# Supplementary material for: A second generation of 1,2,4-oxadiazole derivatives with enhanced solubility for inhibition of 3-hydroxykynurenine transaminase (HKT) from Aedes aegypti
Source: Royal Society of Chemistry journal article supplement (doi:10.1039/d0md00305k), 2020-12-10
Supplement: d0md00305k1.pdf [file d0md00305k1.pdf]

## Electronic Supplementary Information

### A second generation of 1,2,4-oxadiazole derivatives with enhanced solubility for inhibition of 3-hydroxykynurenine transaminase (HKT) from *Aedes aegypti*

Larissa G. Maciel, Andrey da S. Barbosa, Edilson B. de Alencar-Filho, Thereza A. Soares\*,  
Janaína V. dos Anjos\*

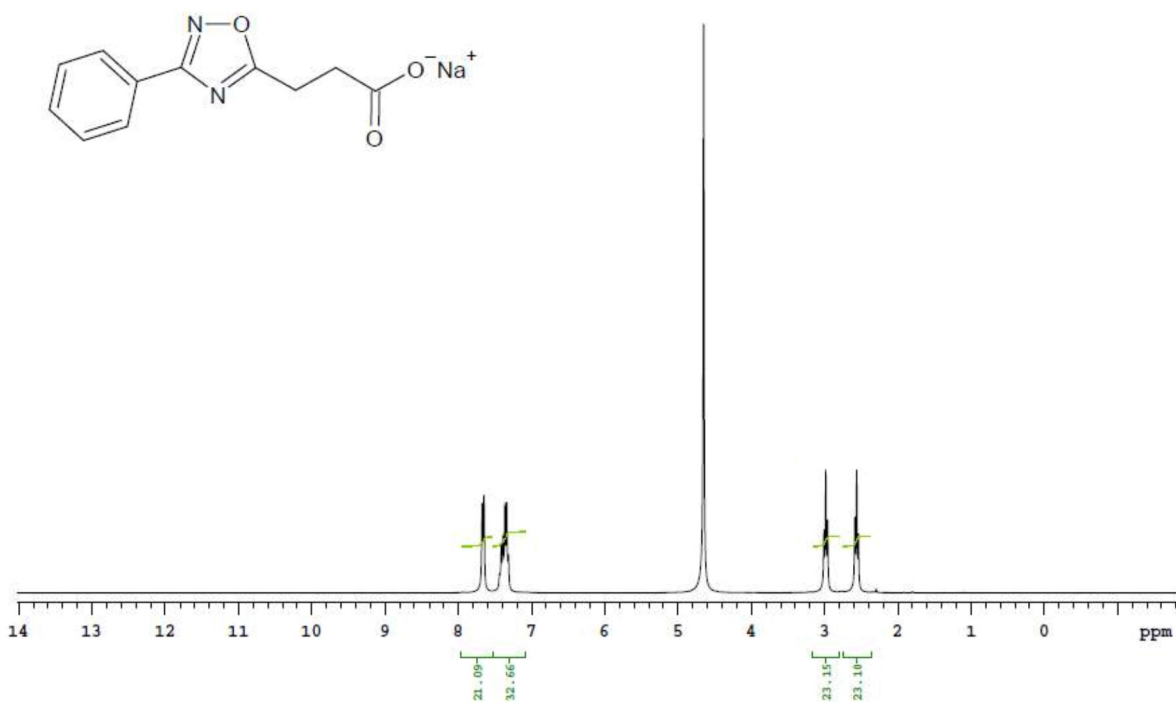

<sup>1</sup>H NMR spectrum of compound **4a** in D<sub>2</sub>O

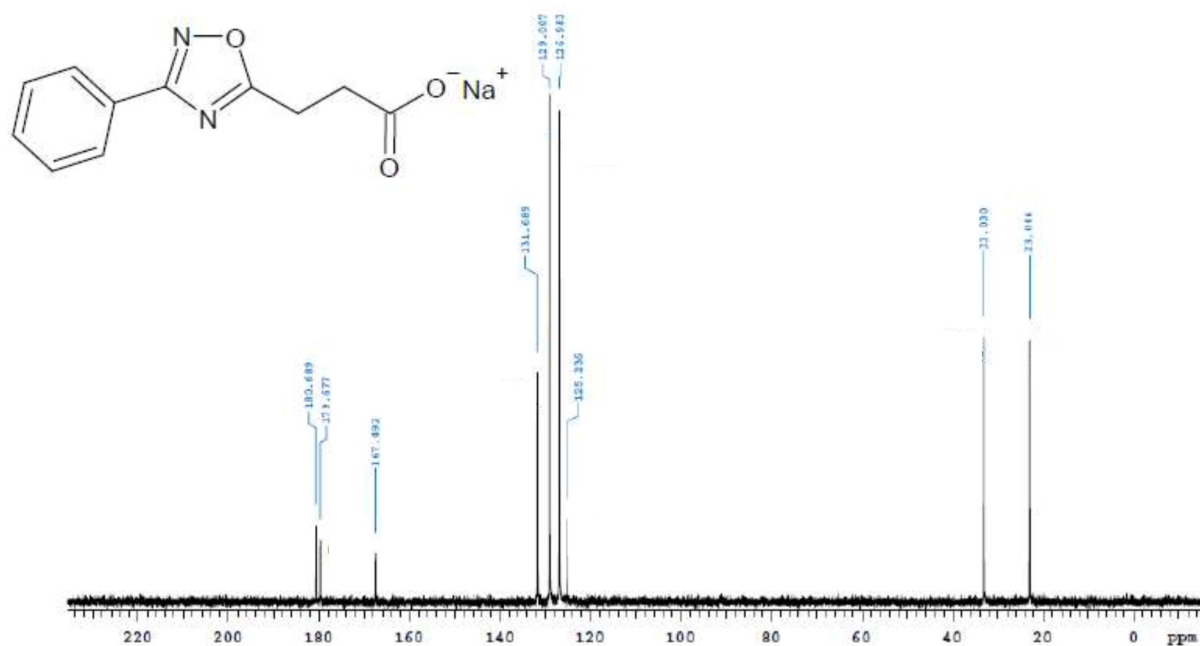

### <sup>13</sup>C NMR spectrum of compound **4a** in D<sub>2</sub>O

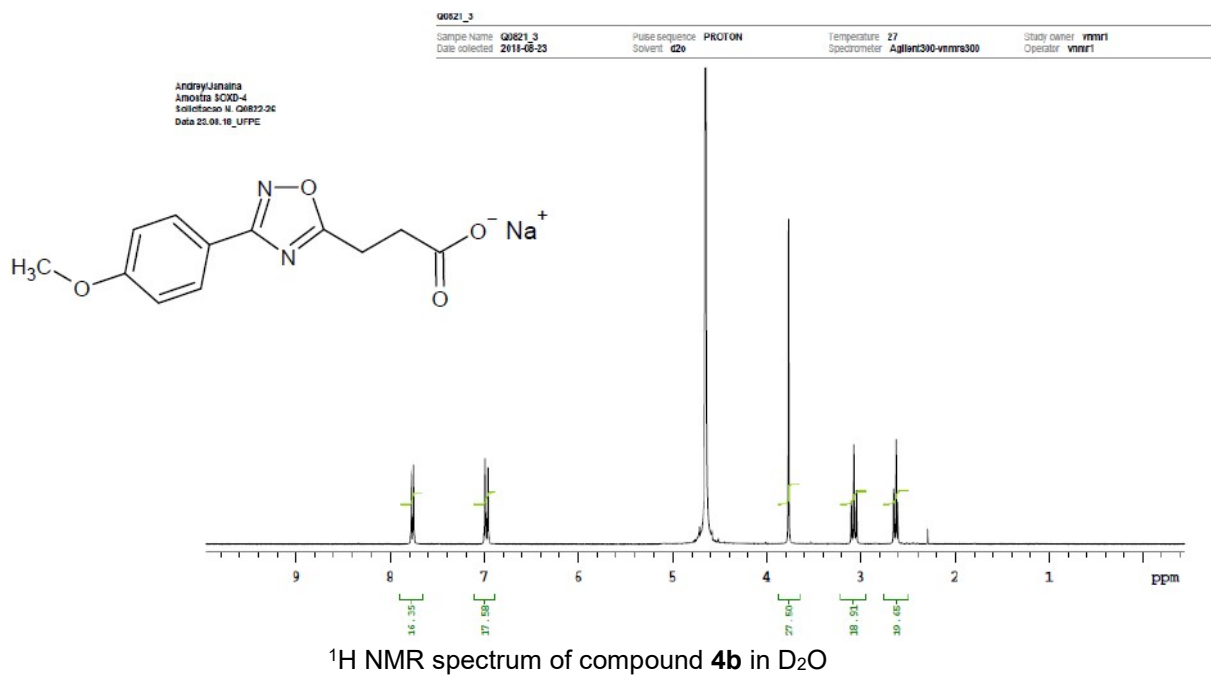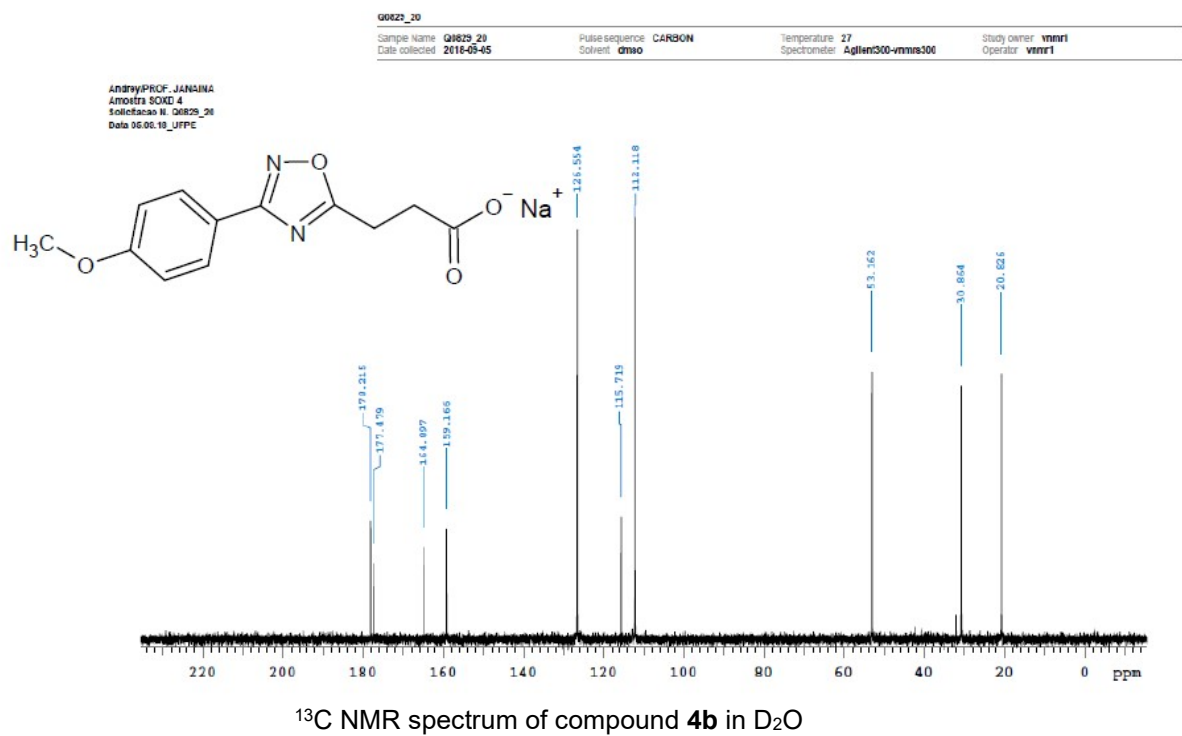

Sample Name: Q0917\_55  
Date collected: 2018-05-19  
Pulse sequence: PROTON  
Solvent: d2o  
Temperature: 27  
Spectrometer: Agilent300-nmrs300  
Study owner: central  
Operator: vsvr1

Andrey/PROF. JAINANA  
Amoxtra 50KD-14  
Solicitação N. Q0917\_55  
Data 13.09.18\_UFFE

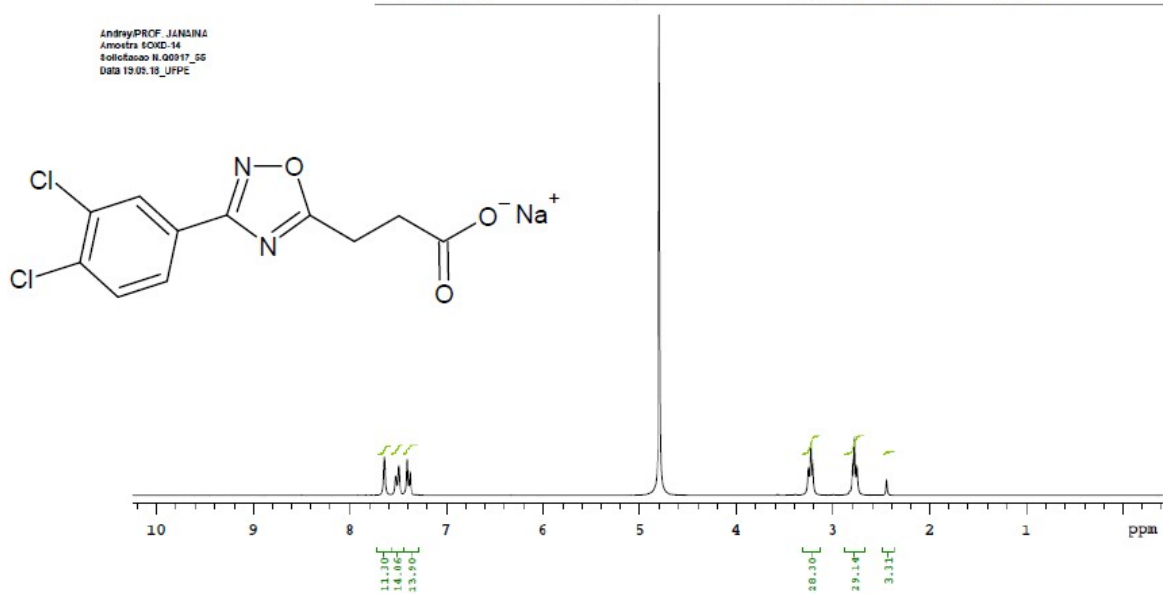

Sample Name: G0917\_55  
Date collected: 2018-05-19  
Pulse sequence: CARBON  
Solvent: d2o  
Temperature: 27  
Spectrometer: Agilent300-nmrs300  
Study owner: central  
Operator: vsvr1

Andrey/PROF. JAINANA  
Amoxtra 50KD-14  
Solicitação N. Q0917\_55  
Data 13.09.18\_UFFE

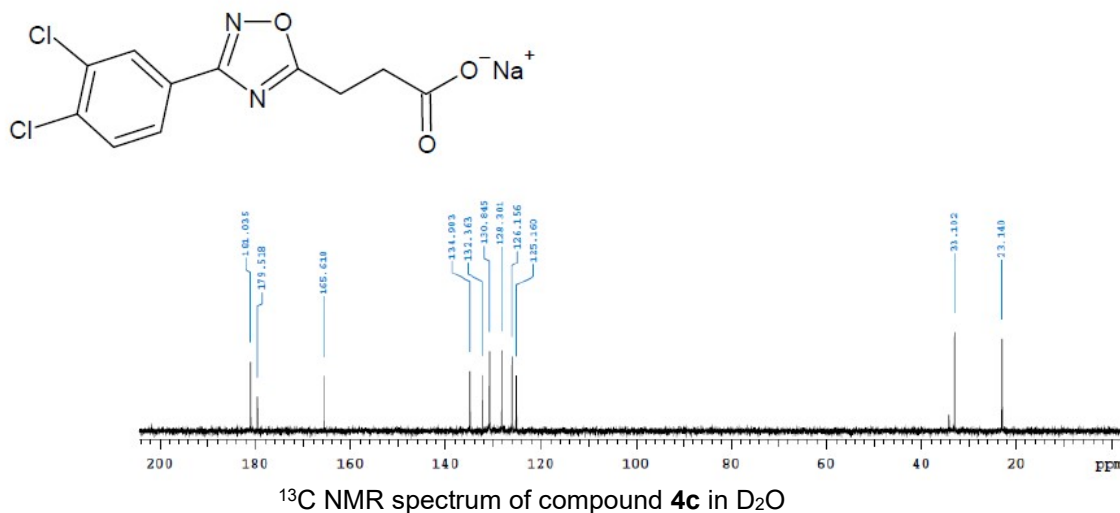

Q0801\_13

Sample Name: Q1091\_13  
Date collected: 2010-05-03Pulse sequence: PROTON  
Solvent: D2OTemperature: 27  
Spectrometer: Agilent300-nmr300Study owner: central  
Operator: vmmr1AndreyJanaina  
Almoeda SOKD-3  
Solicitacao N. Q0802-12  
Data 05.06.18\_UJFPE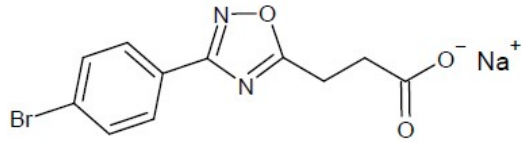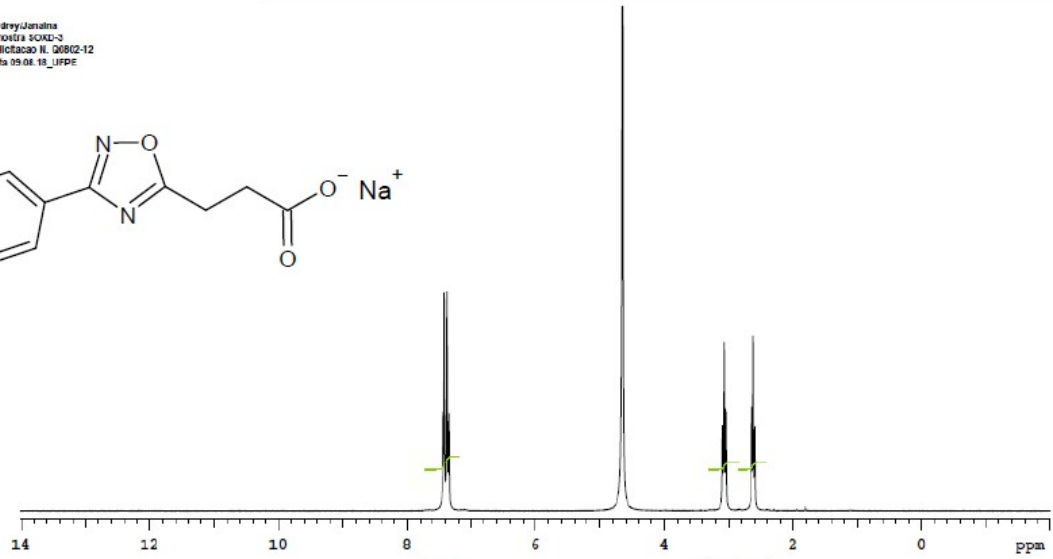<sup>1</sup>H NMR spectrum of compound **4d** in D<sub>2</sub>OSample Name: Q1712\_4  
Date collected: 2011-05-30Pulse sequence: CARBON  
Solvent: d2oTemperature: 27  
Spectrometer: Agilent300-nmr300Study owner: vmmr1  
Operator: vmmr1AndreyJanaina  
Almoeda SOKD-3  
Solicitacao N. Q0802-12  
Data 05.06.18\_UJFPE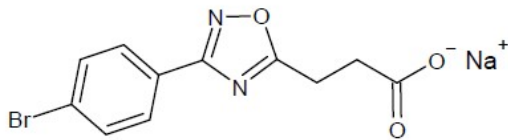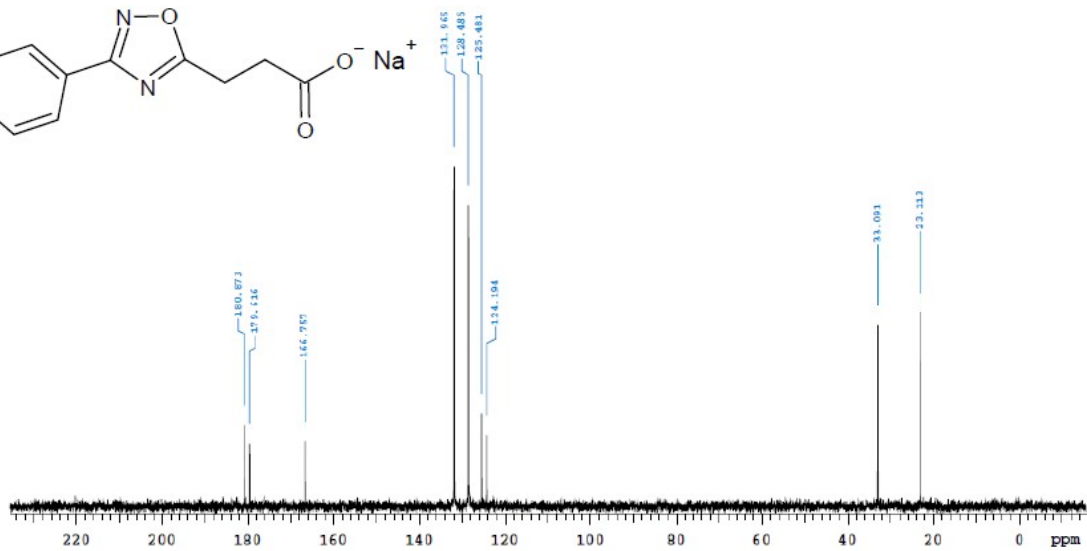<sup>13</sup>C NMR spectrum of compound **4d** in D<sub>2</sub>O

Q0801\_13

Sample Name: Q0801\_13  
Date collected: 2016-05-03Pulse sequence: PROTON  
Solvent: D2OTemperature: 27  
Spectrometer: AgilentD40-vnmr300Study owner: central  
Operator: vnmr1AndreyJanaina  
Alrosta SOD-2  
Solicitação N. Q0802-11  
Data 05.08.18\_LJPPE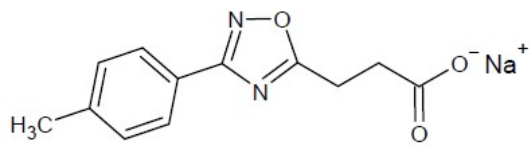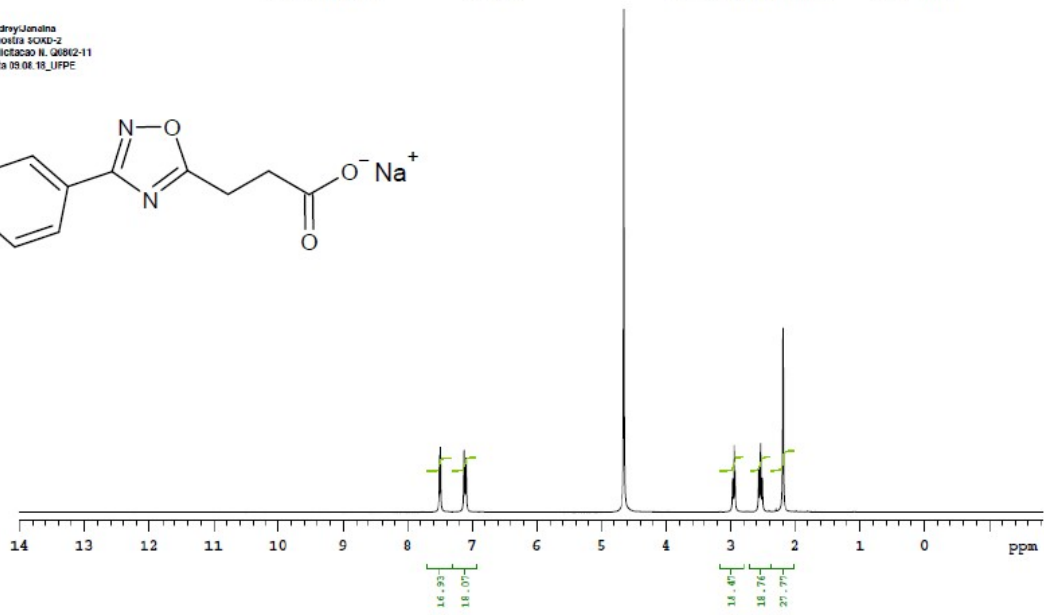<sup>1</sup>H NMR spectrum of compound **4e** in D<sub>2</sub>OSample Name: Q0712\_4  
Date collected: 2016-05-03Pulse sequence: GANDOR  
Solvent: D2OTemperature: 27  
Spectrometer: AgilentD40-vnmr300Study owner: vnmr1  
Operator: vnmr1AndreyJanaina  
Alrosta SOD-2  
Solicitação N. Q0802-11  
Data 05.08.18\_LJPPE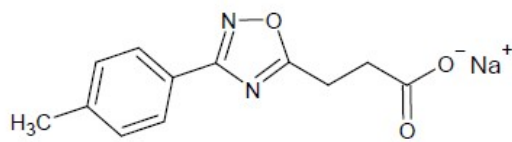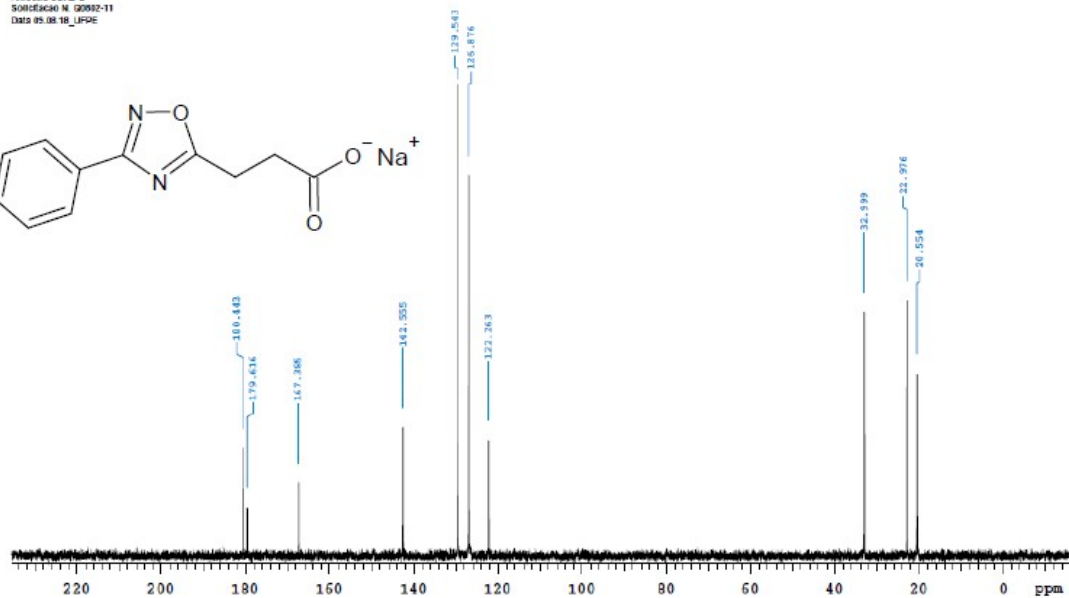<sup>13</sup>C NMR spectrum of compound **4e** in D<sub>2</sub>O

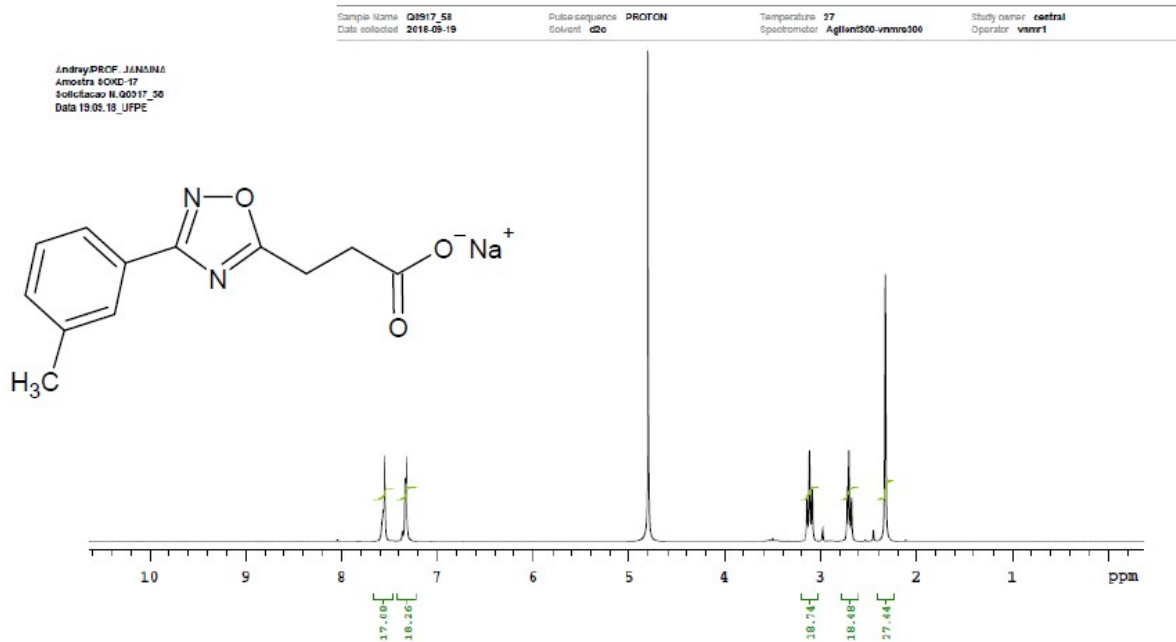

<sup>1</sup>H NMR spectrum of compound **4f** in D<sub>2</sub>O

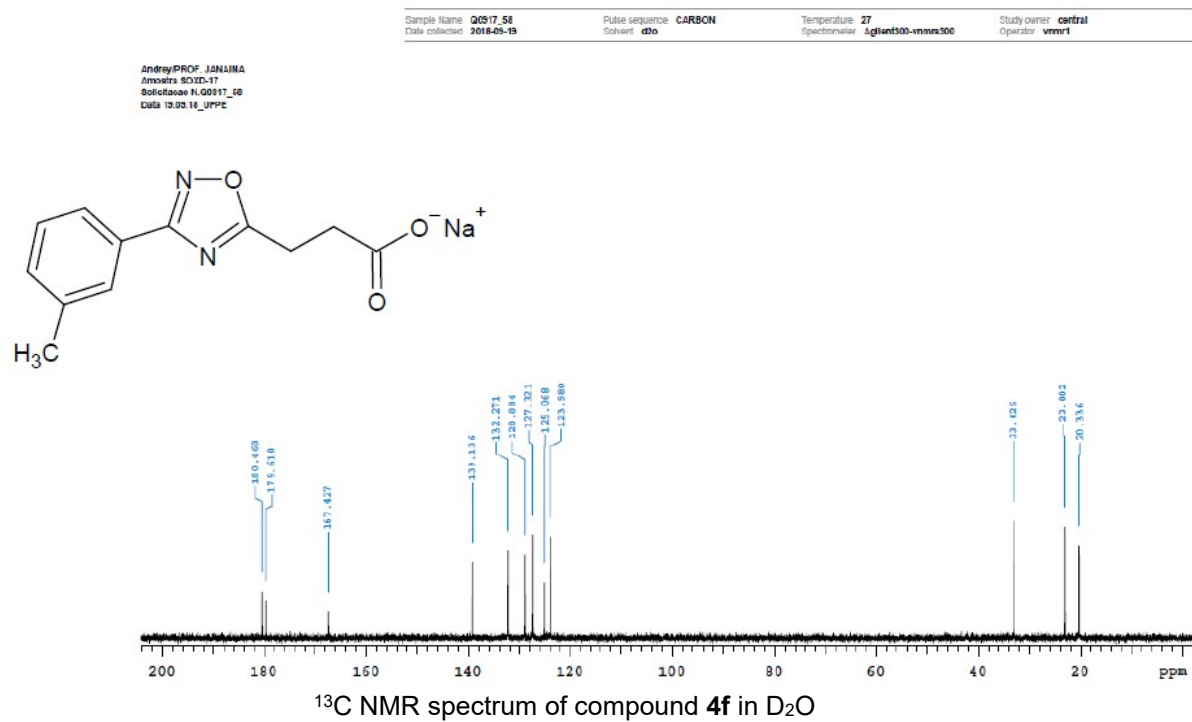

<sup>13</sup>C NMR spectrum of compound **4f** in D<sub>2</sub>O

Q081\_13

Sample Name Q081\_13  
Date collected 2018-08-09Pulse sequence PROTON  
Solvent d2oTemperature 27  
Spectrometer Agilent500-nmr300Study owner central  
Operator vmr1Andrey Janina  
Amostra S0103-7  
Solicitacao N. Q0802-15  
Data 03.06.18\_UFPE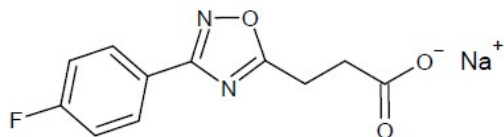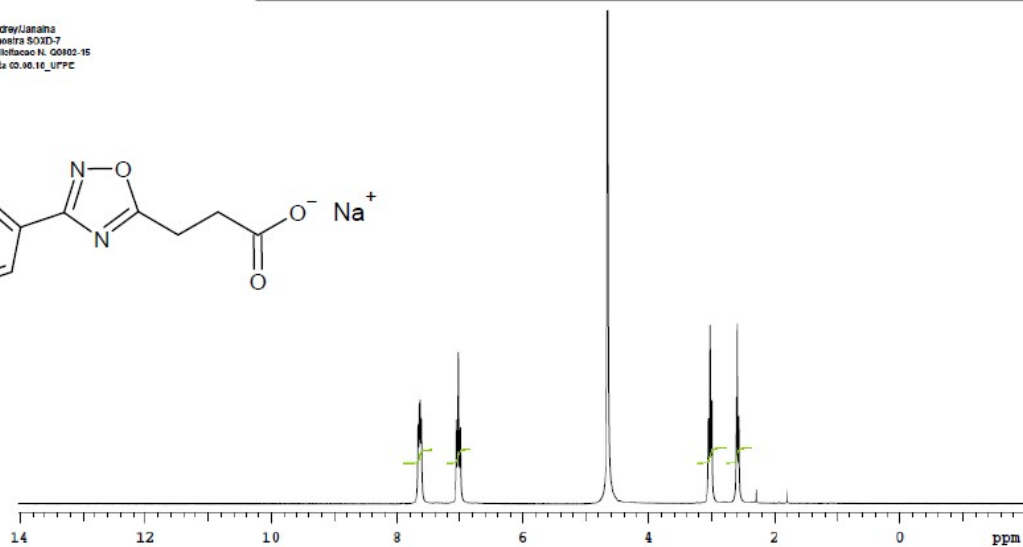<sup>1</sup>H NMR spectrum of compound **4g** in D<sub>2</sub>O

Q0712\_4

Sample Name Q0712\_4  
Date collected 2018-08-09Pulse sequence CARBON  
Solvent d2oTemperature 27  
Spectrometer Agilent500-nmr300Study owner vmr1  
Operator vmr1Andrey Janina  
Amostra S0103-7  
Solicitacao N. Q0802-15  
Data 03.06.18\_UFPE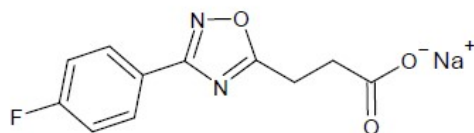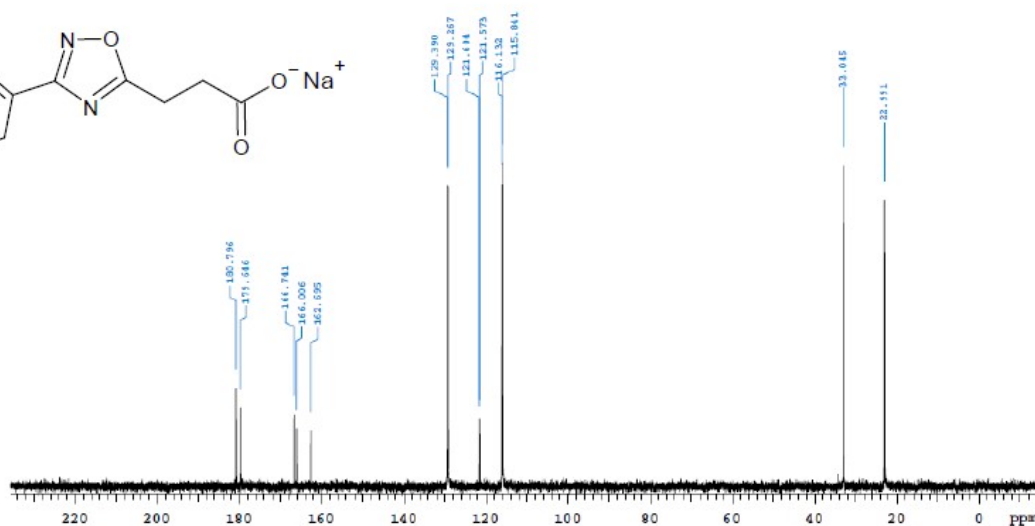<sup>13</sup>C NMR spectrum of compound **4g** in D<sub>2</sub>O

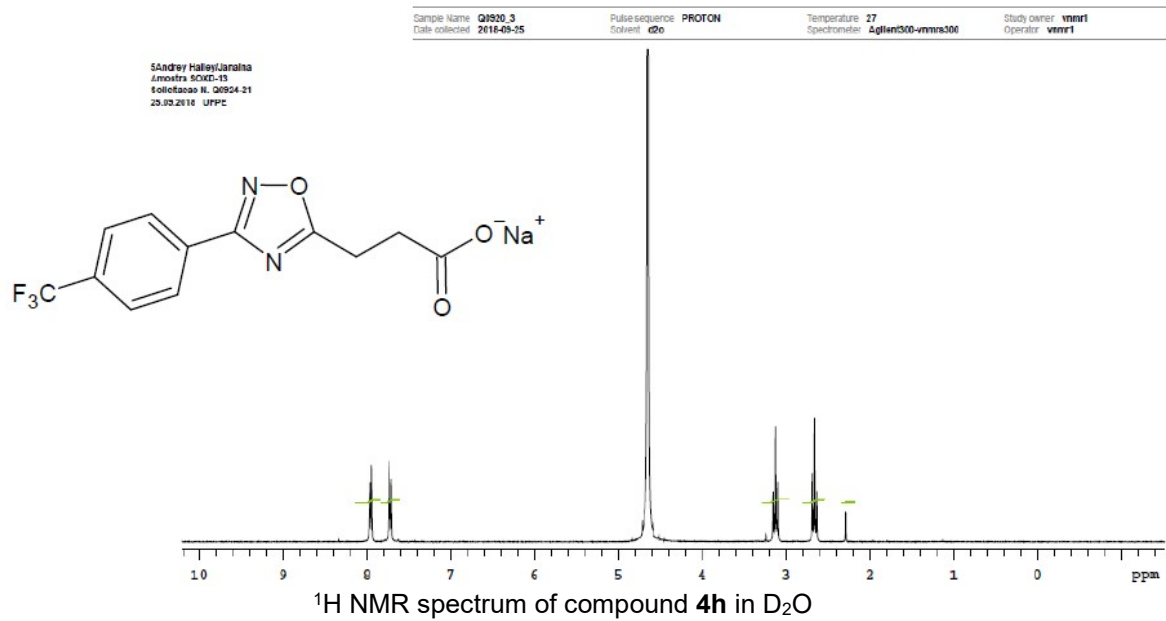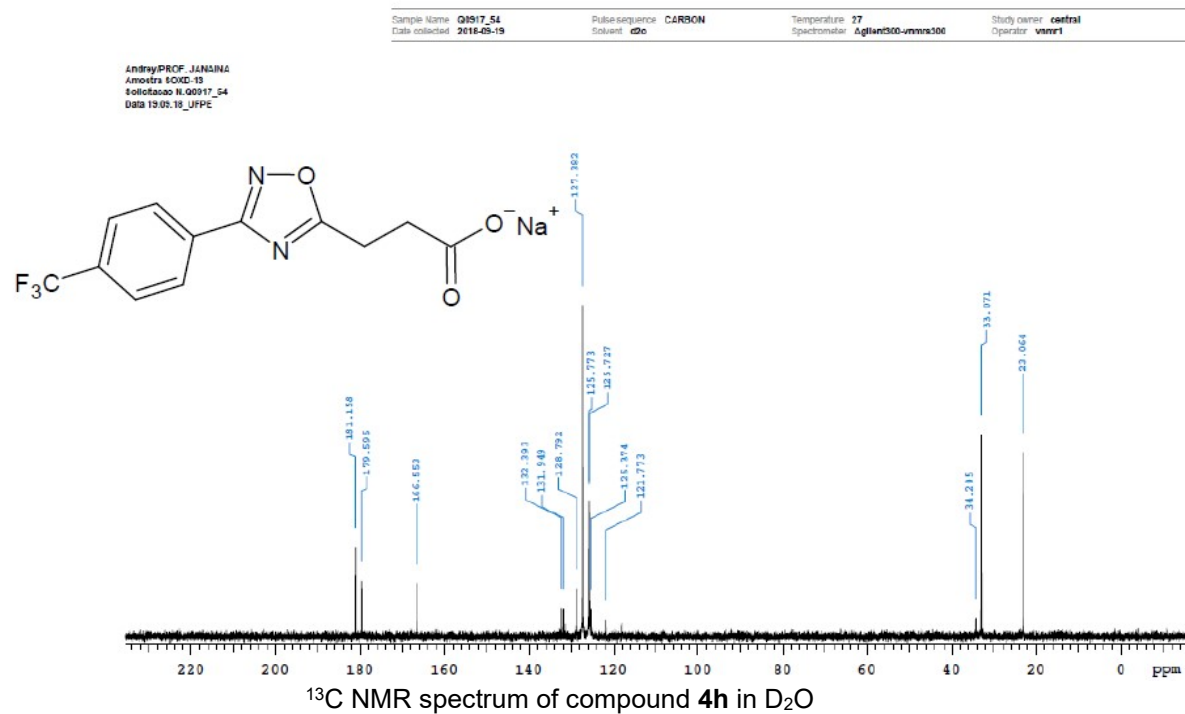



WU21\_3

Sample Name: G0621\_3  
Date collected: 2018-06-23

Pulse sequence: PROTON  
Solvent: D2O

Temperature: 27  
Spectrometer: Agilent300-nmr300

Study owner: vmm1  
Operator: vmm1

AndreyJanaina  
Amostra SOXD-10  
Solicitacao N. Q0823-10  
Data 21.08.18\_UFFE

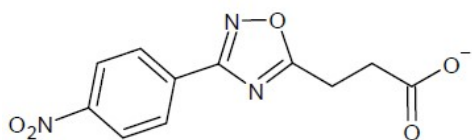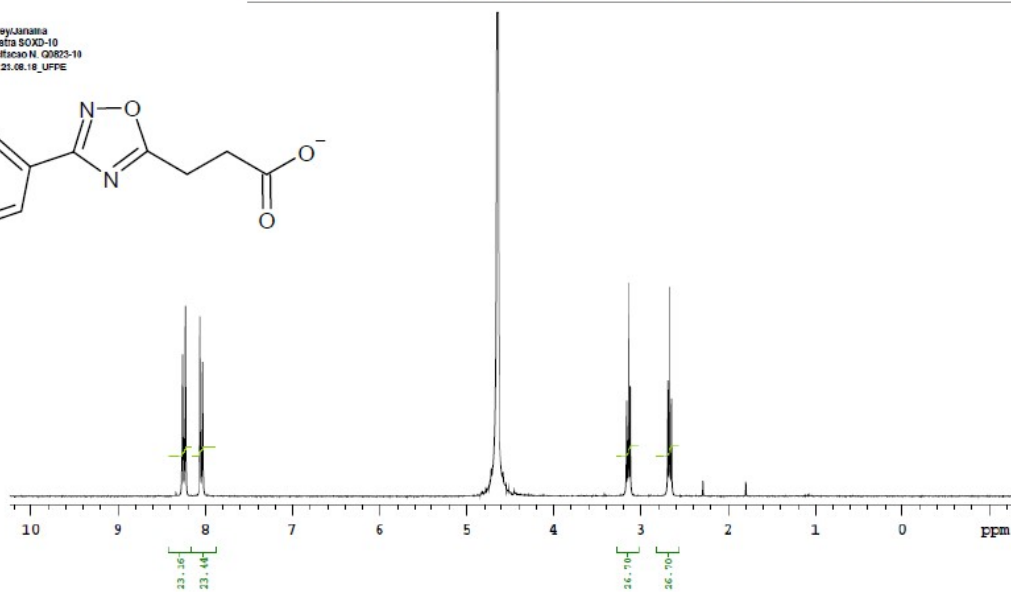

<sup>1</sup>H NMR spectrum of compound **4i** in D<sub>2</sub>O

Sample Name: Q0829\_25  
Date collected: 2018-08-02

Pulse sequence: CARBON  
Solvent: d2o

Temperature: 27  
Spectrometer: Agilent500-nmr500

Study owner: vmm1  
Operator: vmm1

Andrey/PROF. JONAINA  
Amostra SOXD 10  
Solicitacao N. Q0829\_25  
Data 05.05.18\_UFFE

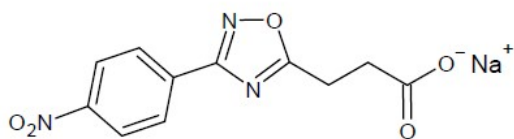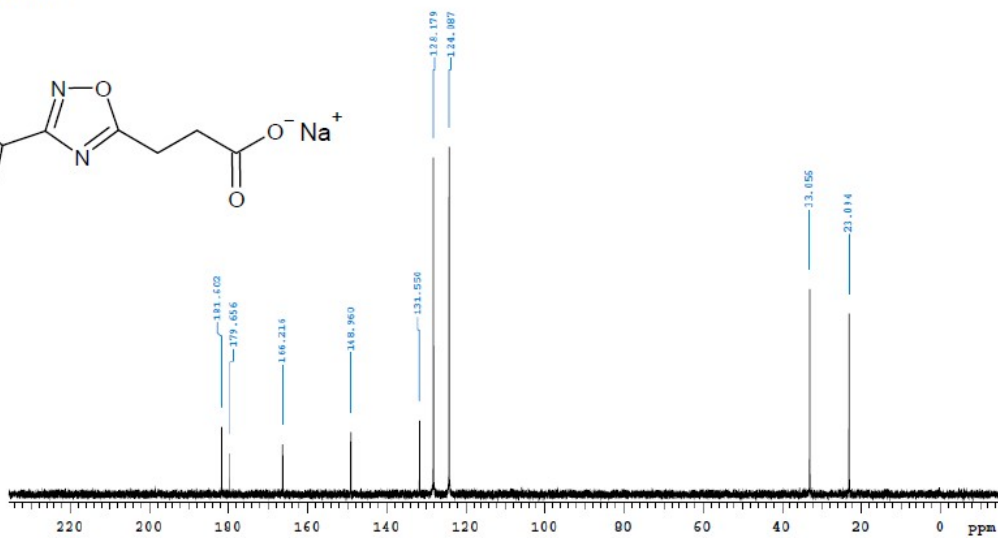

<sup>13</sup>C NMR spectrum of compound **4i** in D<sub>2</sub>O

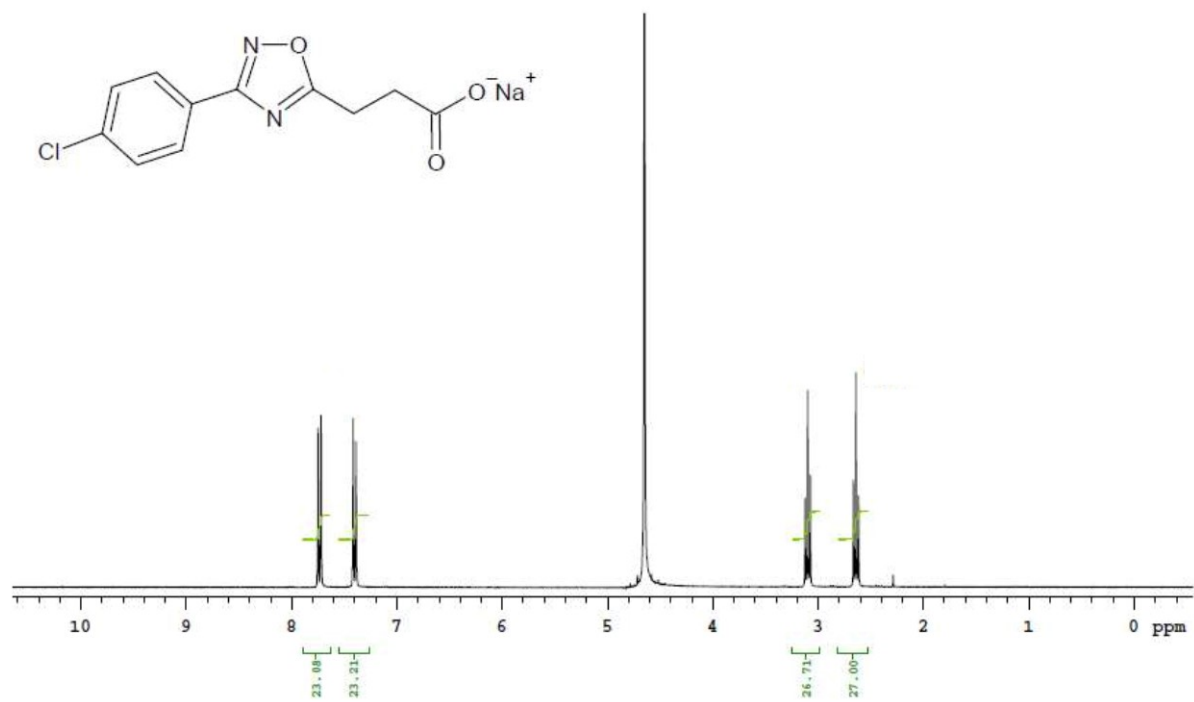

<sup>1</sup>H NMR spectrum of compound 4j in D<sub>2</sub>O

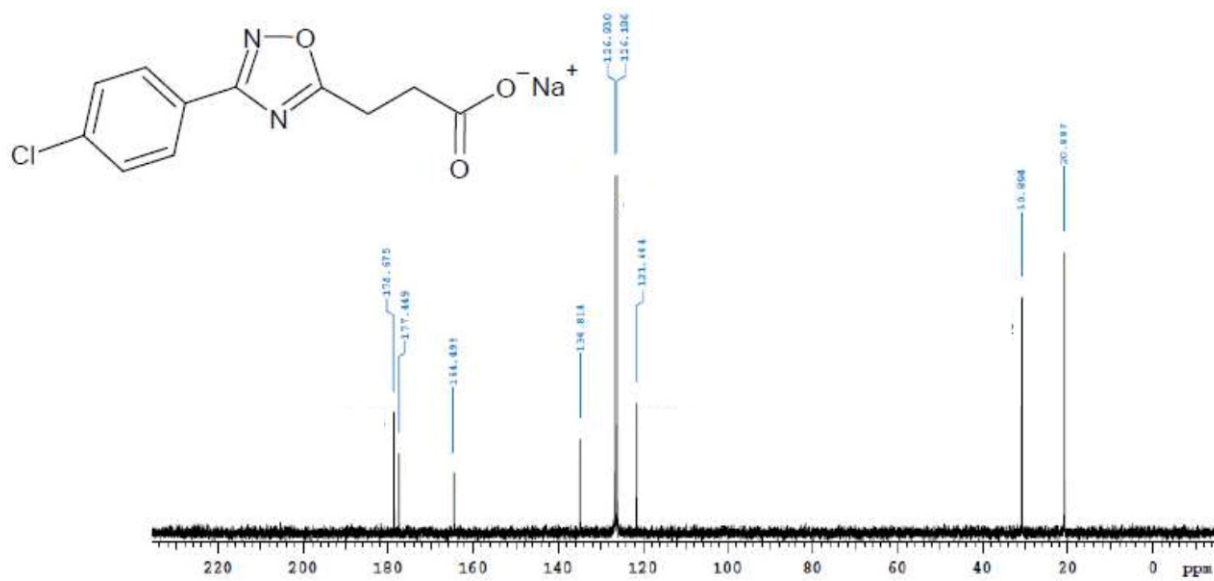

<sup>13</sup>C NMR spectrum of compound 4j in D<sub>2</sub>O

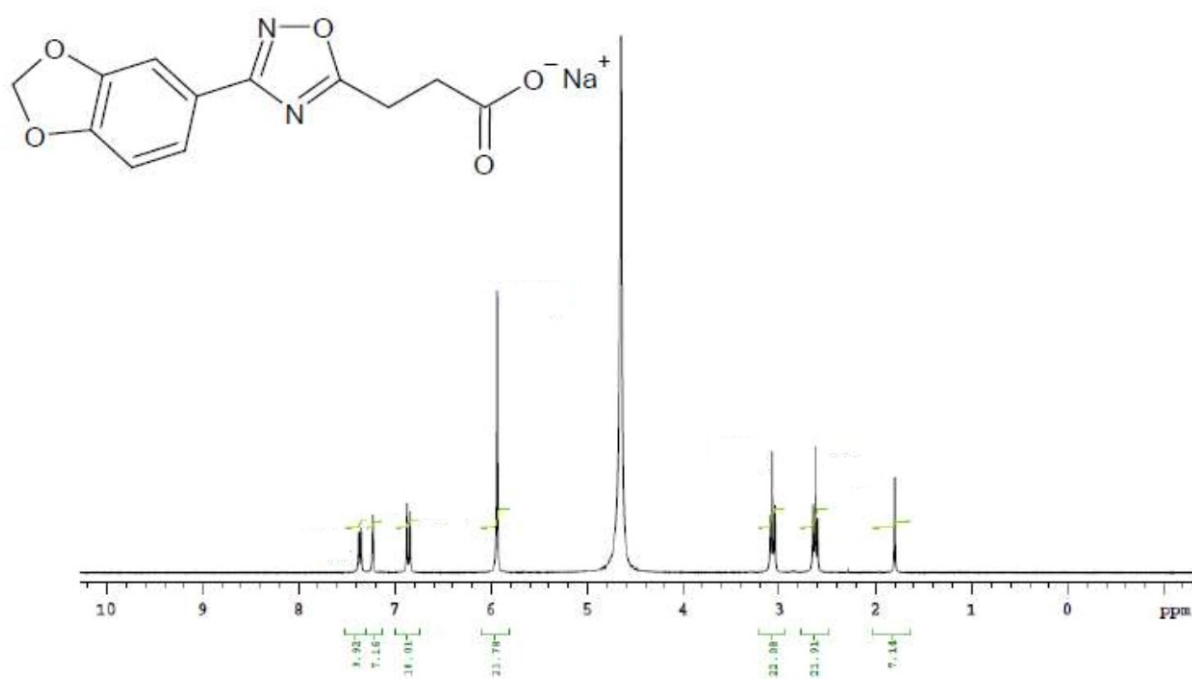

<sup>1</sup>H NMR spectrum of compound **4k** in D<sub>2</sub>O

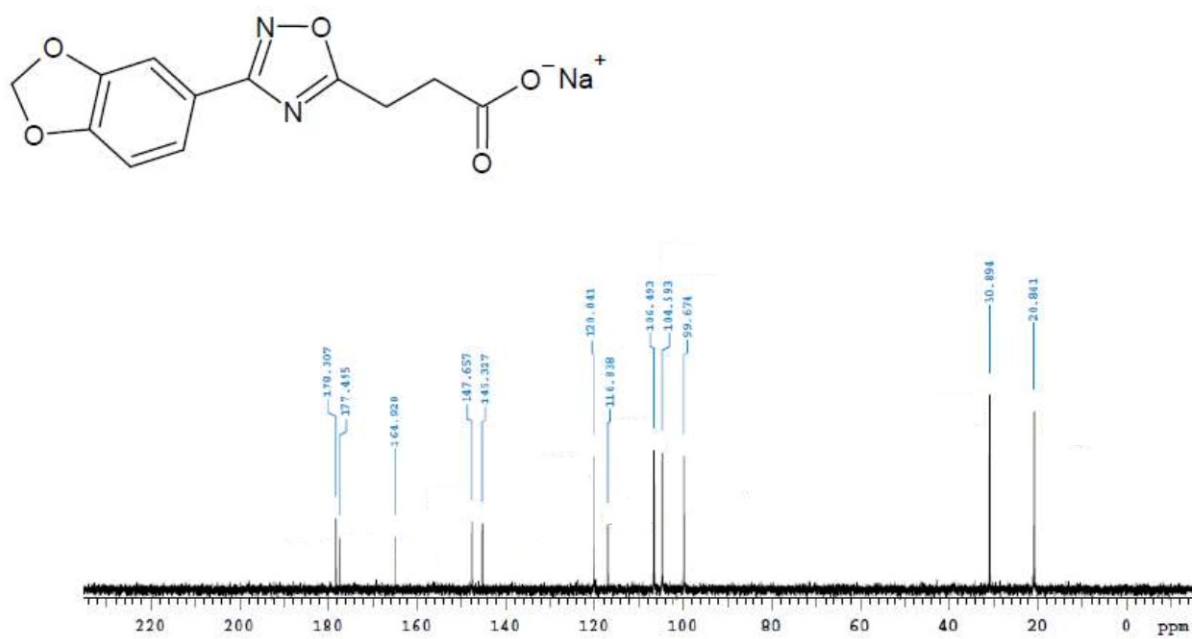

<sup>13</sup>C NMR spectrum of compound **4k** in D<sub>2</sub>O

Q0821\_3

Sample Name: Q0821\_3  
Date collected: 2018-05-23Pulse sequence: PROTON  
Solvent: D2OTemperature: 27  
Spectrometer: Agilent300-vnmr300Study name: vnmr1  
Operator: vnmr1AndreyJianita  
Amostra SOXD-5  
Solicitação N. Q0822-28  
Data 23.08.18\_UFPE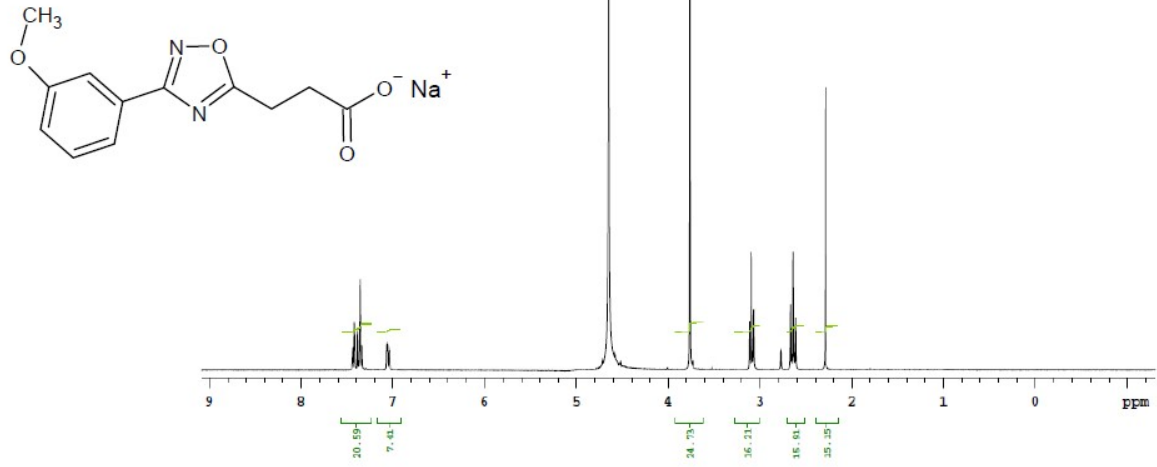<sup>1</sup>H NMR spectrum of compound 4I in D<sub>2</sub>O

Q0822\_22

Sample Name: Q0822\_22  
Date collected: 2018-05-16Pulse sequence: CARBON  
Solvent: DMSOTemperature: 27  
Spectrometer: Agilent300-vnmr300Study name: vnmr1  
Operator: vnmr1AndreyPROF. JANAINA  
Amostra SOXD 6  
Solicitação N. Q0822\_22  
Data 05.05.18\_UFPE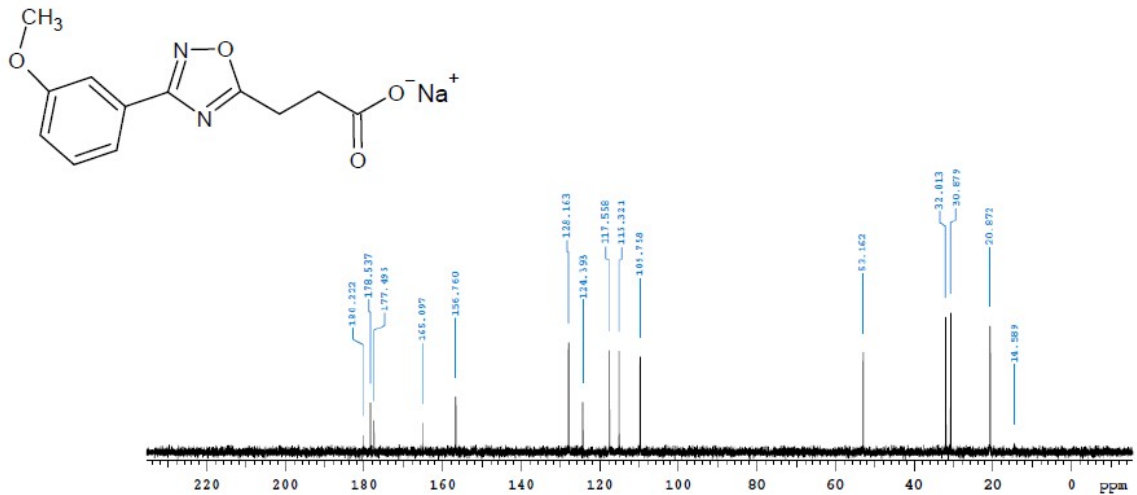<sup>13</sup>C NMR spectrum of compound 4I in D<sub>2</sub>O

Q0021\_3

Sample Name: Q0021\_3  
Date collected: 2016-05-23

Pulse sequence: PROTON  
Solvent: D2O

Temperature: 27  
Spectrometer: Agilent300-VNMR300

Study owner: rmmf1  
Operator: vmmf1

AndreyJanaina  
Amostra SXND-3  
Solicitação N. Q0822-25  
Data 23.05.16\_UFPE

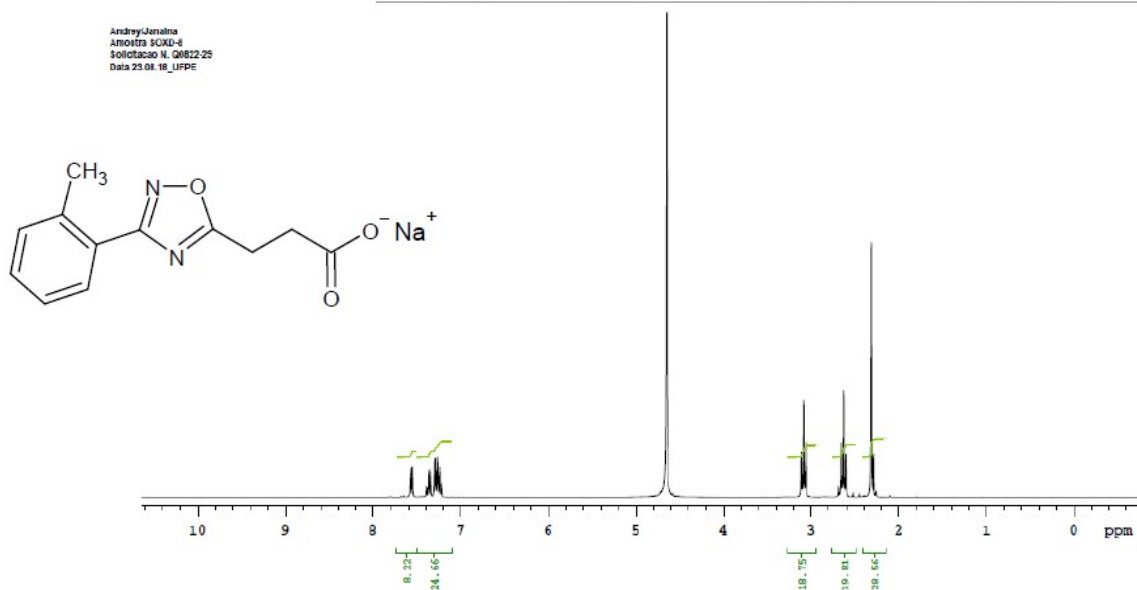

<sup>1</sup>H NMR spectrum of compound **4m** in D<sub>2</sub>O

Q0021\_23

Sample Name: Q0021\_23  
Date collected: 2016-05-05

Pulse sequence: CARBON  
Solvent: DMSO

Temperature: 27  
Spectrometer: Agilent300-VNMR300

Study owner: rmmf1  
Operator: vmmf1

AndreyJanaina  
Amostra SXND-8  
Solicitação N. Q0829-23  
Data 05.05.16\_UFPE

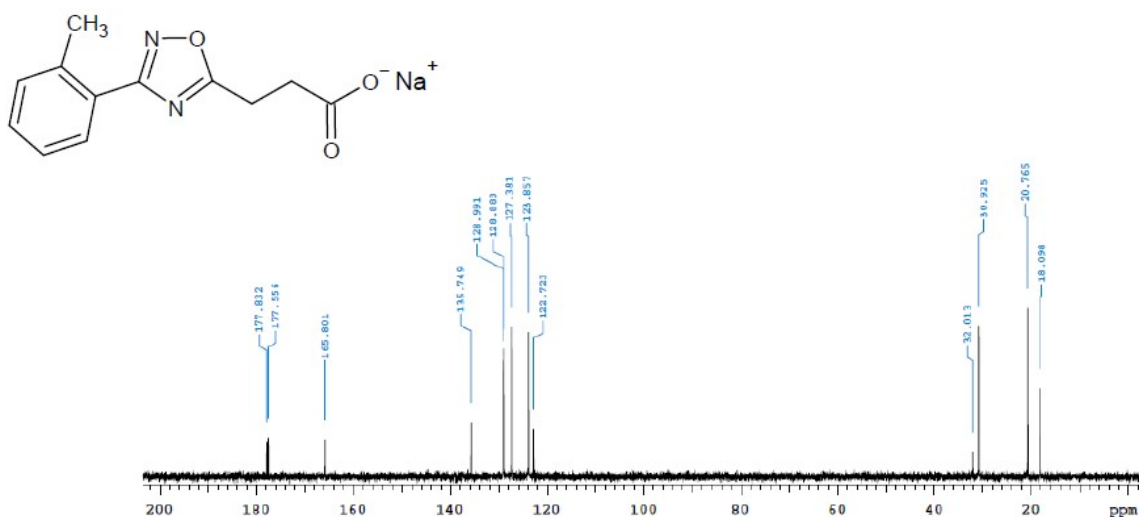

<sup>13</sup>C NMR spectrum of compound **4m** in DMSO

AndryJanaina  
 Amostra SOXD-15  
 Solicitação N. 01105-19  
 Data 00.12.18\_UFPE

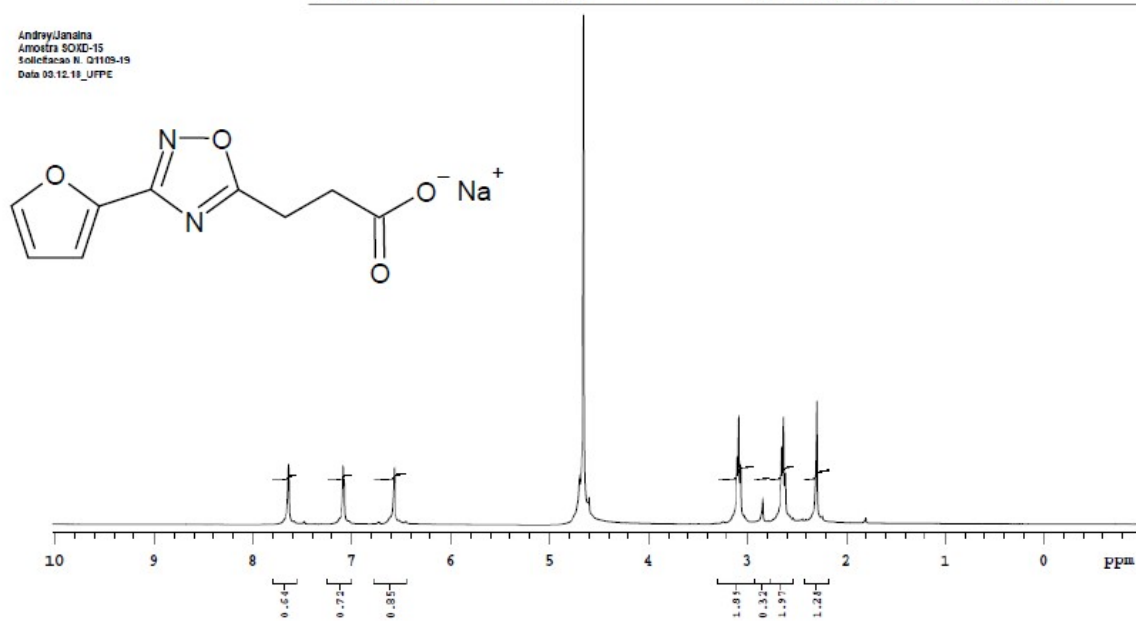

<sup>1</sup>H NMR spectrum of compound 4n in D<sub>2</sub>O

AndryPROF. JANAINA  
 Amostra SOXD-15  
 Solicitação N. 06917\_56  
 Data 15.05.18\_UFPE

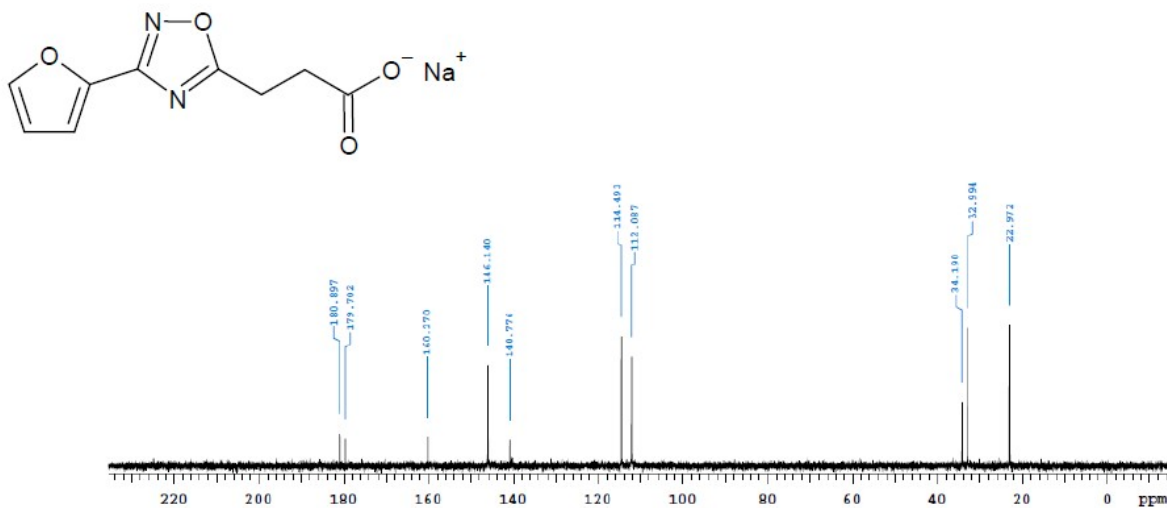

<sup>13</sup>C NMR spectrum of compound 4n in D<sub>2</sub>O

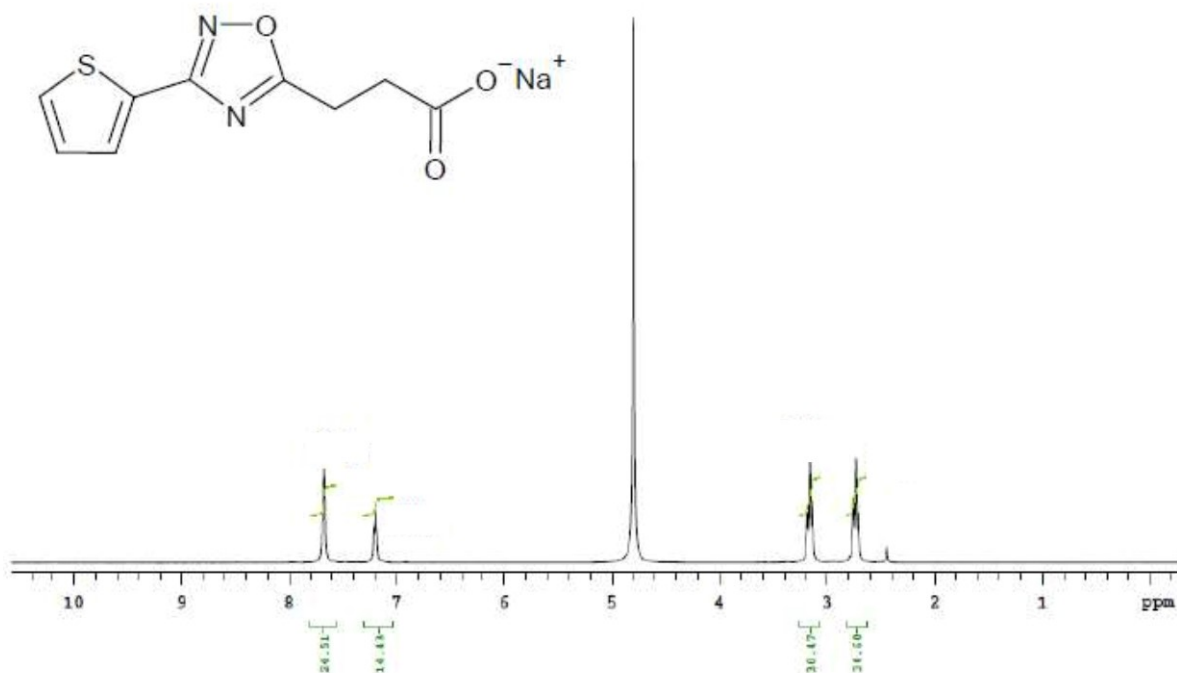

<sup>1</sup>H NMR spectrum of compound **4o** in D<sub>2</sub>O

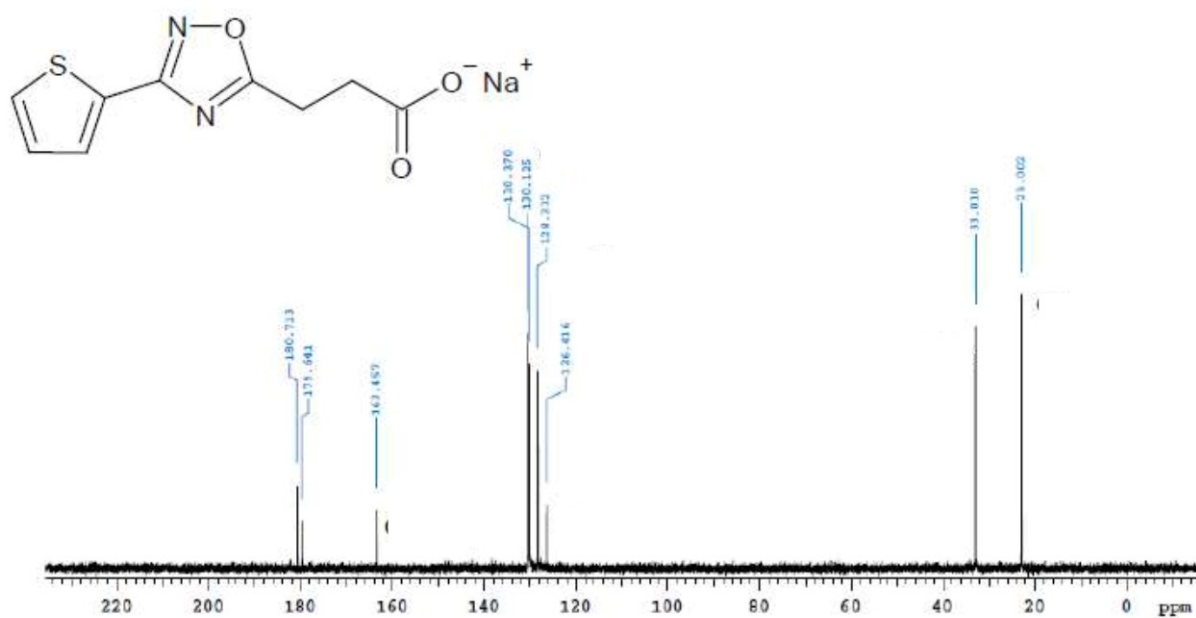

<sup>13</sup>C NMR spectrum of compound **4o** in D<sub>2</sub>O

Q0917\_52

Sample Name: Q0917\_52 Pulse sequence: PROTON Temperature: 27 Study owner: conral  
 Date collected: 2016-02-10 Solvent: d2o Spectrometer: AgilentD01-vnmr300 Operator: vnmr1

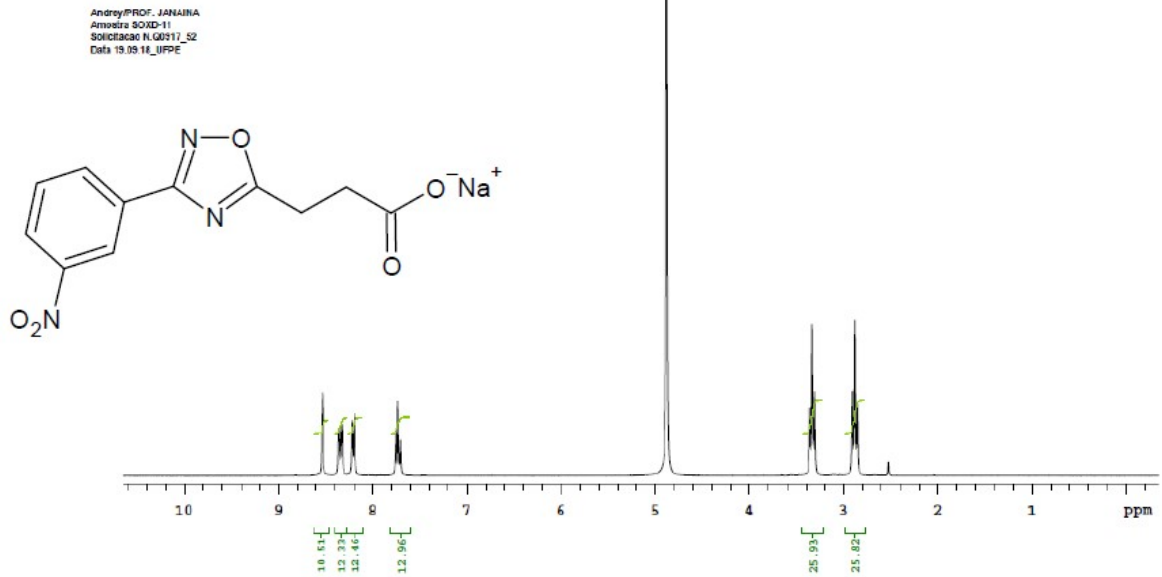

<sup>1</sup>H NMR spectrum of compound **4p** in D<sub>2</sub>O

Sample Name: Q0917\_52 Pulse sequence: CARBON Temperature: 27 Study owner: conral  
 Date collected: 2016-02-10 Solvent: d2o Spectrometer: AgilentD01-vnmr300 Operator: vnmr1

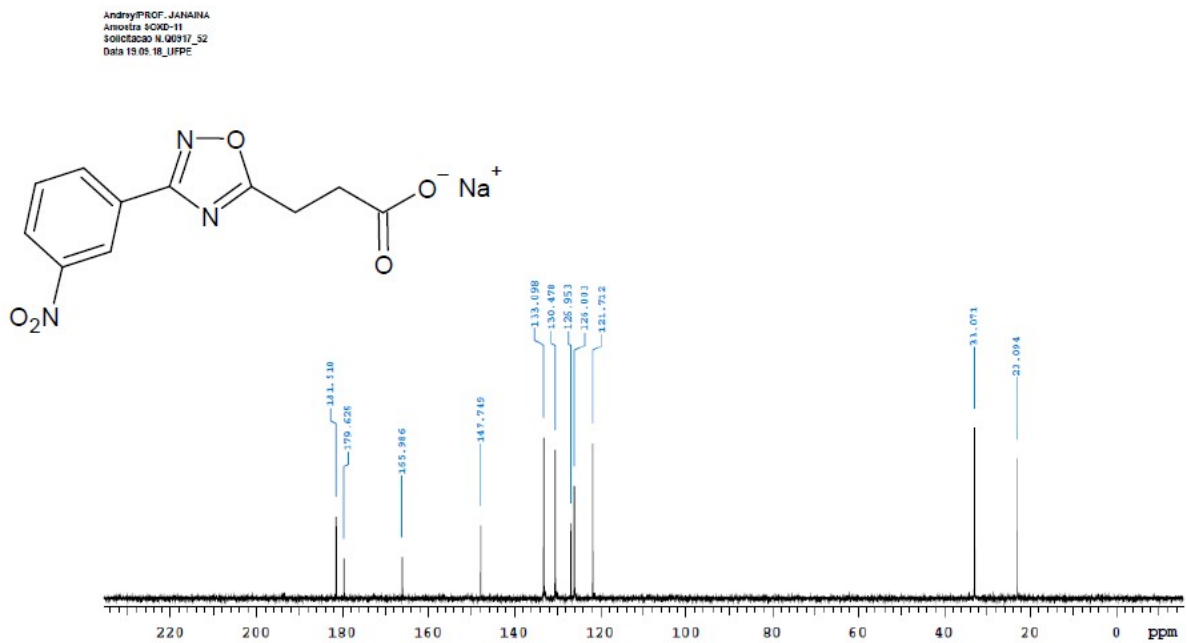

<sup>13</sup>C NMR spectrum of compound **4p** in D<sub>2</sub>O



Sample Name **Q0917\_59** Pulse sequence **PROTON** Temperature **27** Study owner **central**  
Date collected **2016-09-10** Solvent **d2o** Spectrometer **AgilentD00-vnmr300** Operator **vnmr1**

Andrey/PROF. JANAINA  
Amostra S00K0-15  
Solicitação N. Q0917\_59  
Data 19.09.18\_UFPE

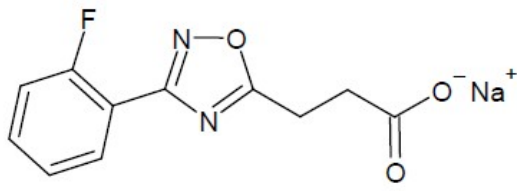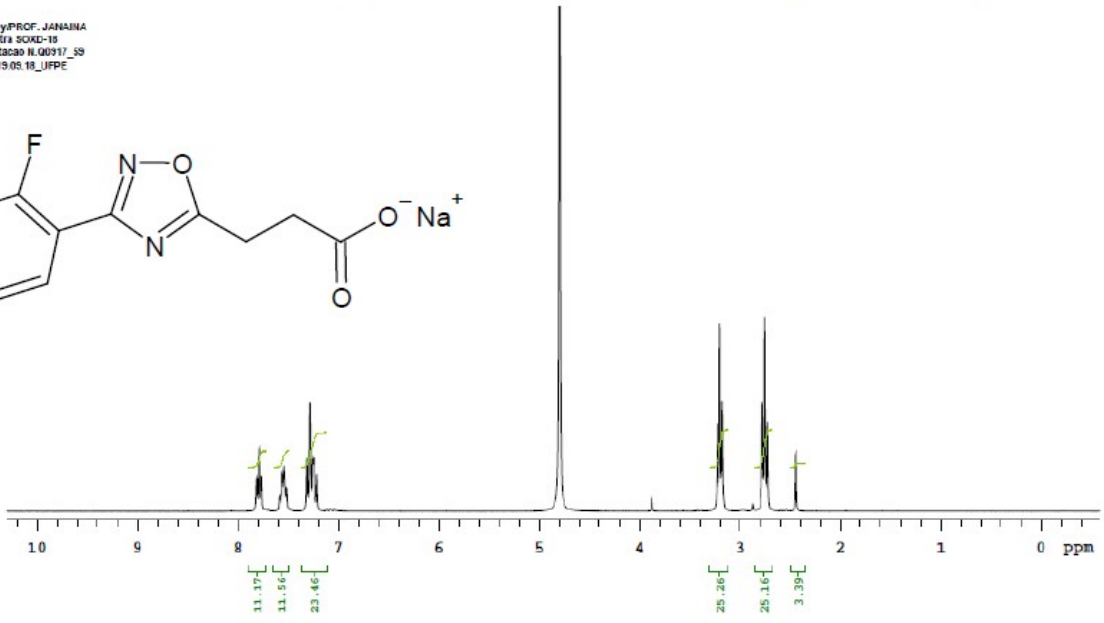

<sup>1</sup>H NMR spectrum of compound **4q** in D<sub>2</sub>O

Sample Name **Q0917\_59** Pulse sequence **CARBON** Temperature **27** Study owner **central**  
Date collected **2018-05-19** Solvent **d2o** Spectrometer **AgilentD00-vnmr340** Operator **vnmr1**

Andrey/PROF. JANAINA  
Amostra S00K0-15  
Solicitação N. Q0917\_59  
Data 19.09.18\_UFPE

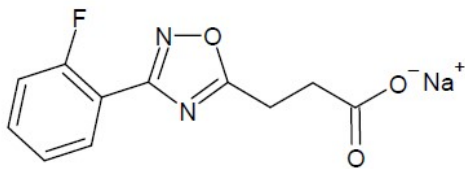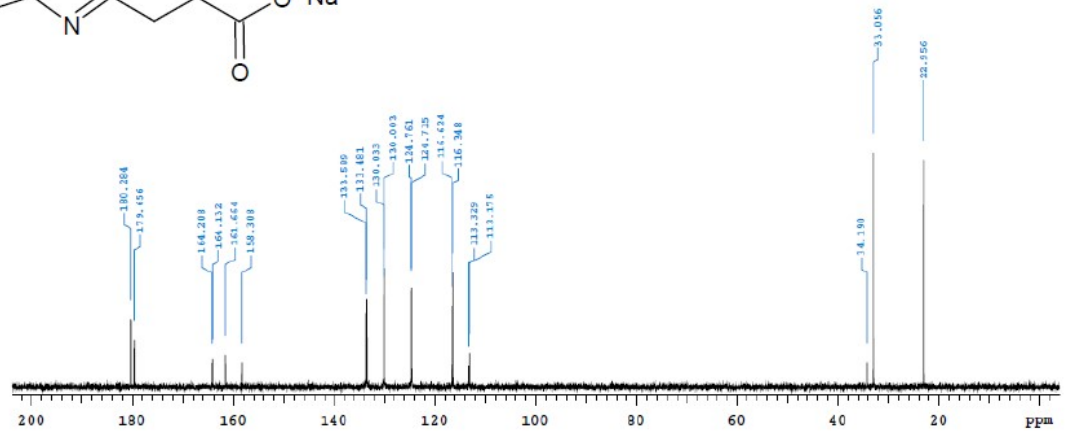

<sup>13</sup>C NMR spectrum of compound **4q** in D<sub>2</sub>O

Sample Name **Q0917\_60** Pulse sequence **PRCTON** Temperature **27** Study owner **central**  
Date collected **2016-05-10** Solvent **d2o** Spectrometer **Agilent1300-vnmr300** Operator **vmar1**

Andrey/PROF. JANAINA  
Amostra SXU-13  
Solucao N.00917\_60  
Data 15.09.18\_LUFPE

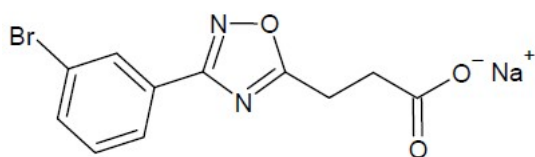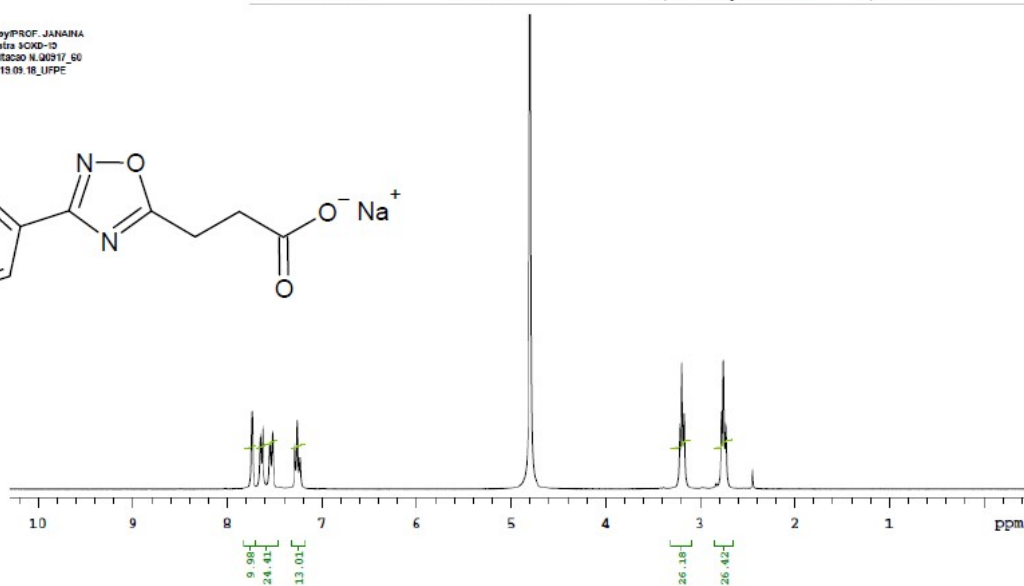

<sup>1</sup>H NMR spectrum of compound **4r** in D<sub>2</sub>O

Sample Name **Q0917\_60** Pulse sequence **CARBON** Temperature **27** Study owner **central**  
Date collected **2016-05-10** Solvent **d2o** Spectrometer **Agilent1300-vnmr300** Operator **vmar1**

Andrey/PROF. JANAINA  
Amostra SXU-13  
Solucao N.00917\_60  
Data 15.09.18\_LUFPE

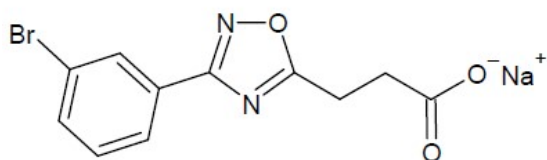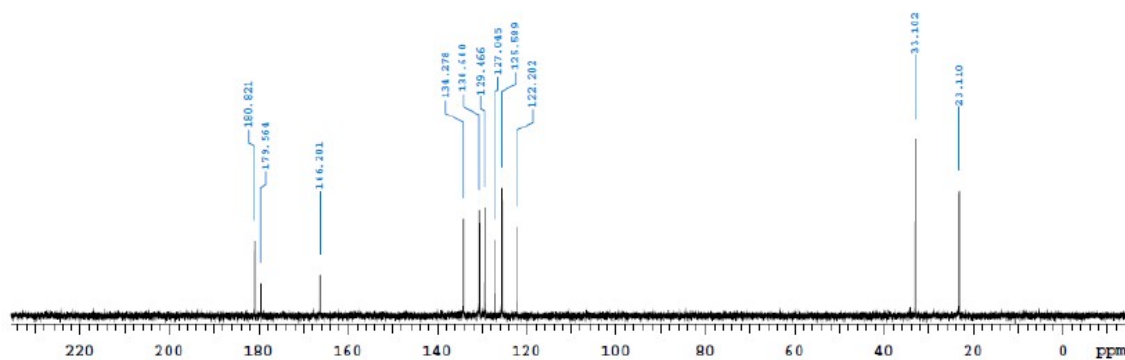

<sup>13</sup>C NMR spectrum of compound **4r** in D<sub>2</sub>O

Sample Name: PCT0414r Pulse sequence: PROTON Temperature: 27  
Date collected: 2019-01-15 Solvent: d2o Spectrometer: varian400-vnmrs400 Study owner: vnmr1  
Operator: operador

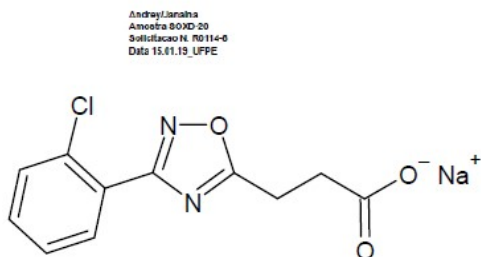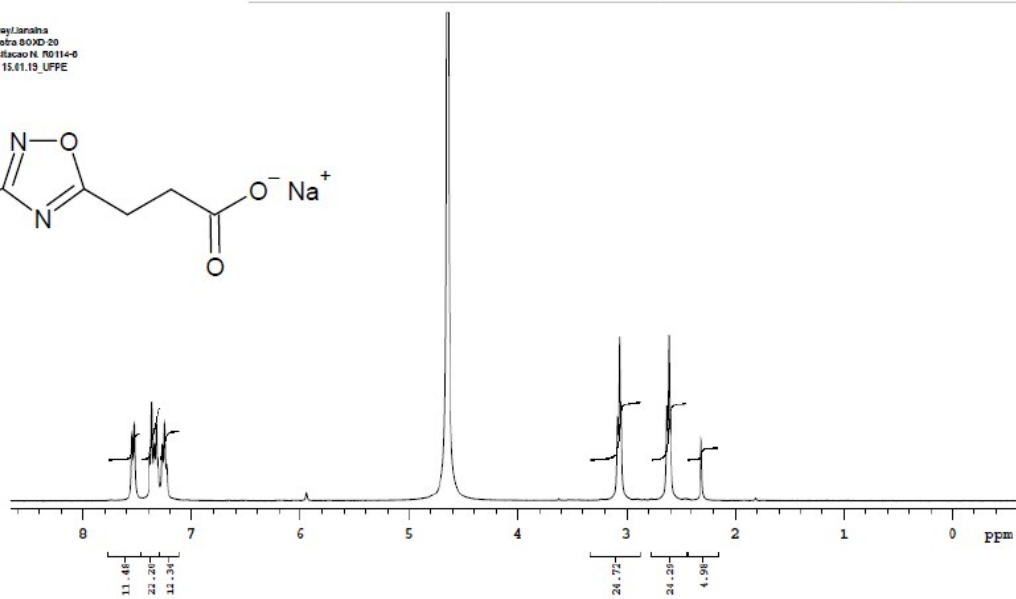

<sup>1</sup>H NMR spectrum of compound **4s** in D<sub>2</sub>O

Sample Name: PCT0414r Pulse sequence: CARBON Temperature: 27  
Date collected: 2019-01-15 Solvent: d2o Spectrometer: varian400-vnmrs400 Study owner: vnmr1  
Operator: operador

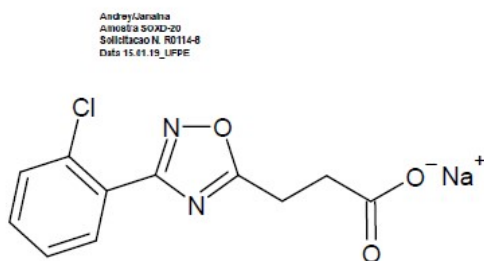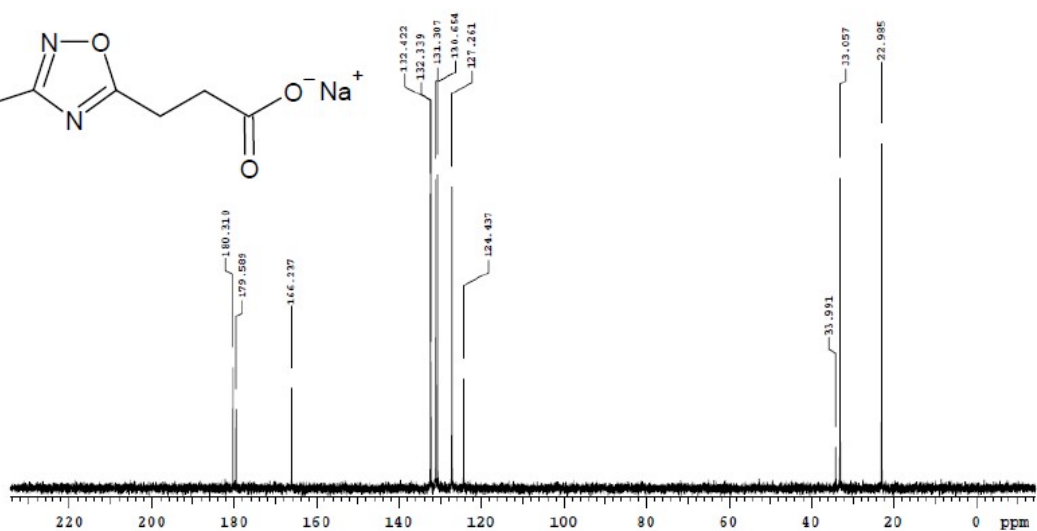

<sup>13</sup>C NMR spectrum of compound **4s** in D<sub>2</sub>O

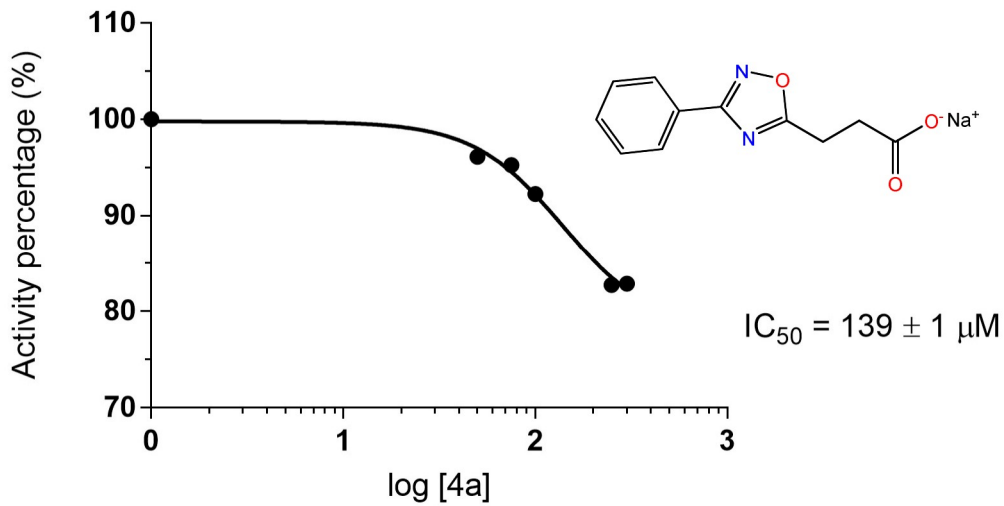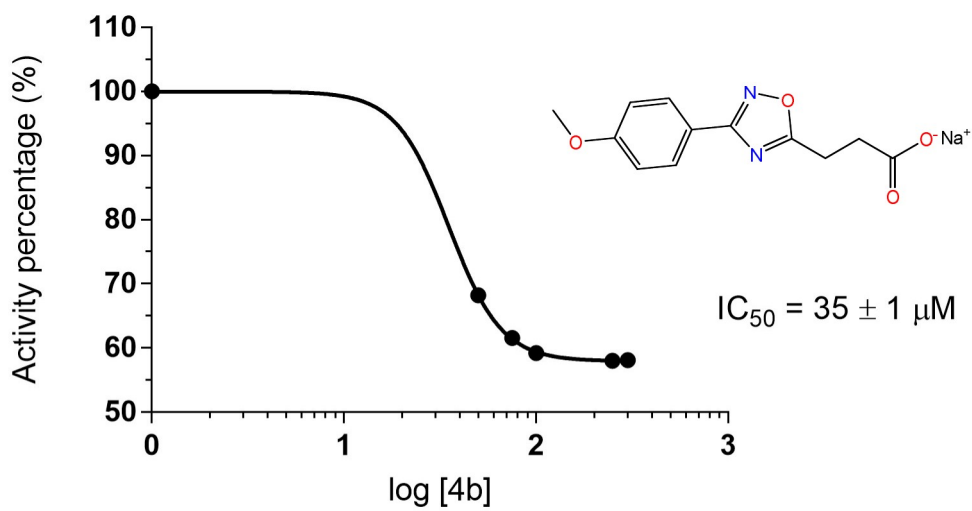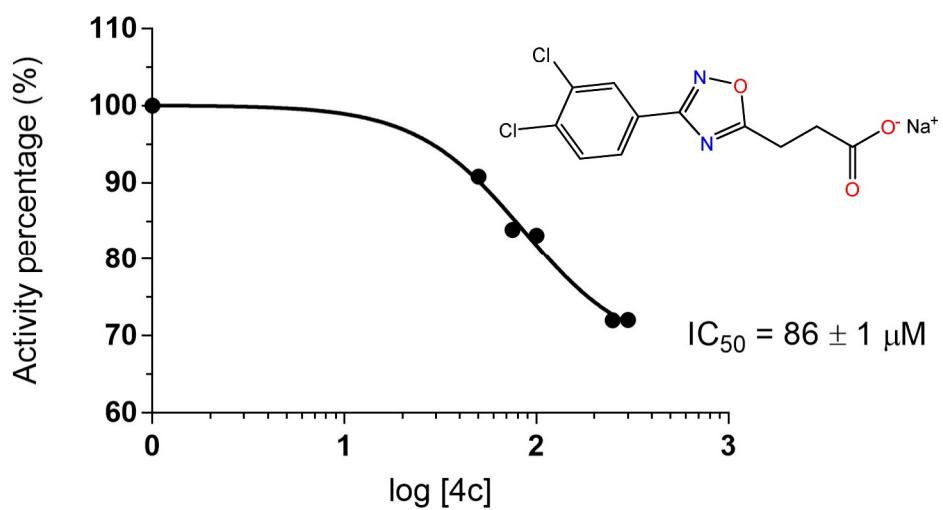

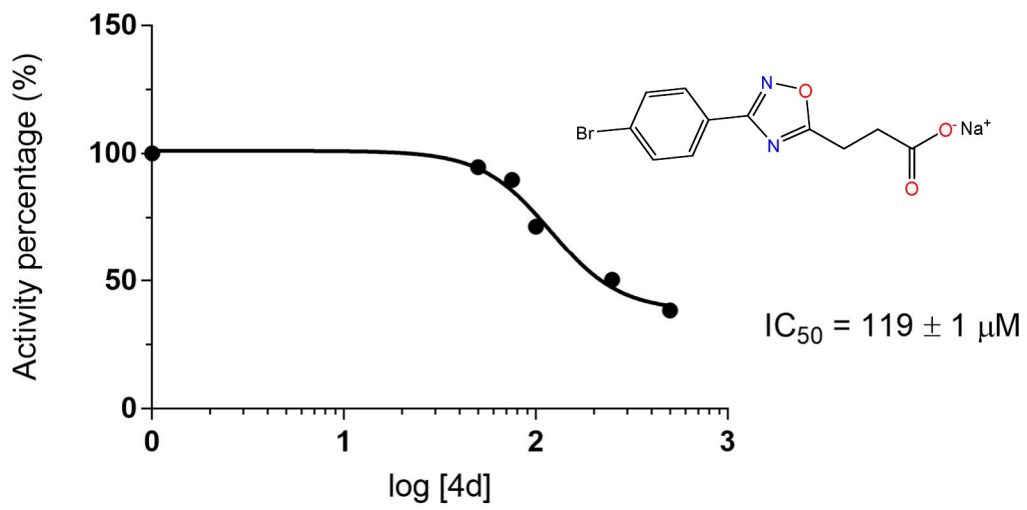

Dose-response curve of compound **4d**

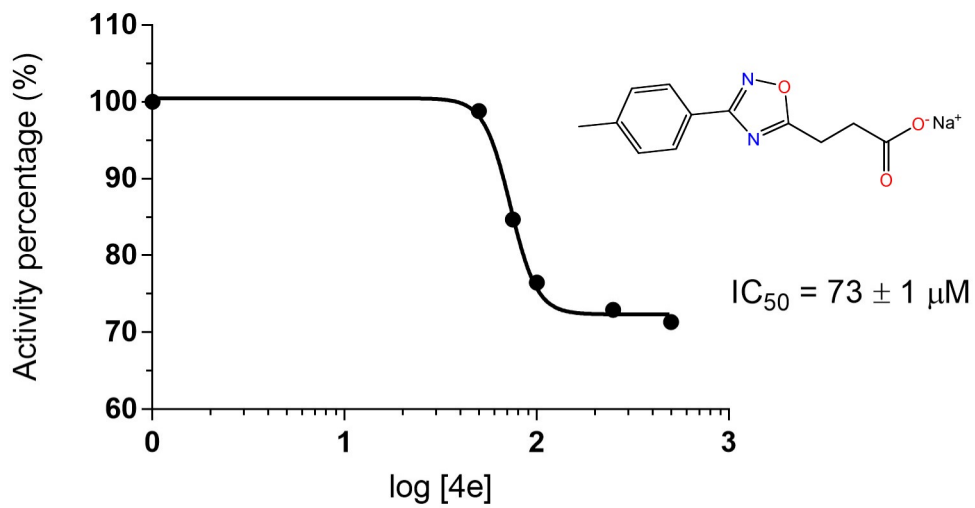

Dose-response curve of compound **4e**

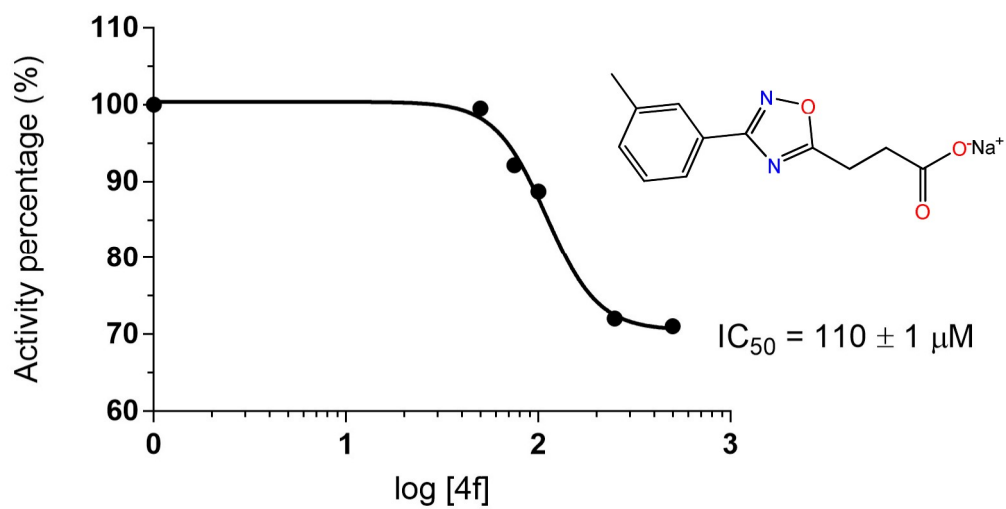

Dose-response curve of compound **4f**

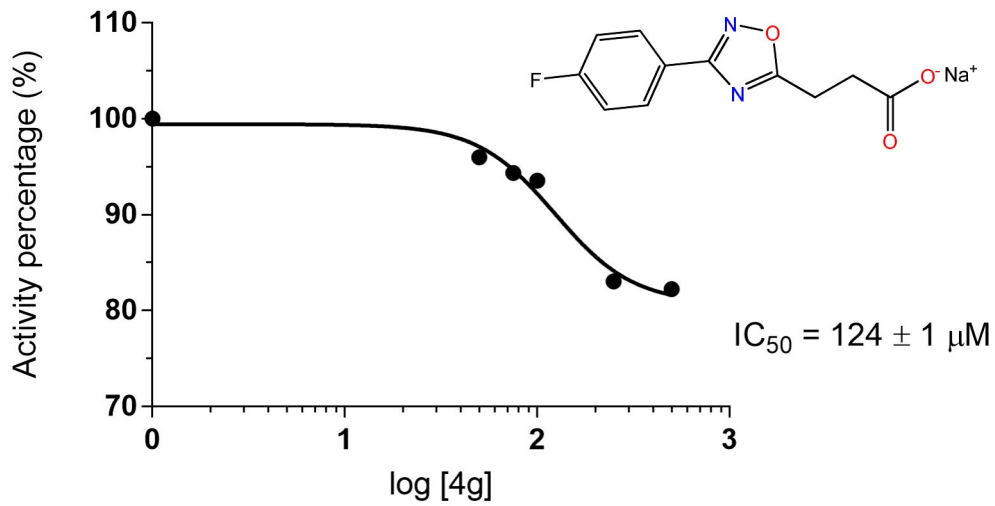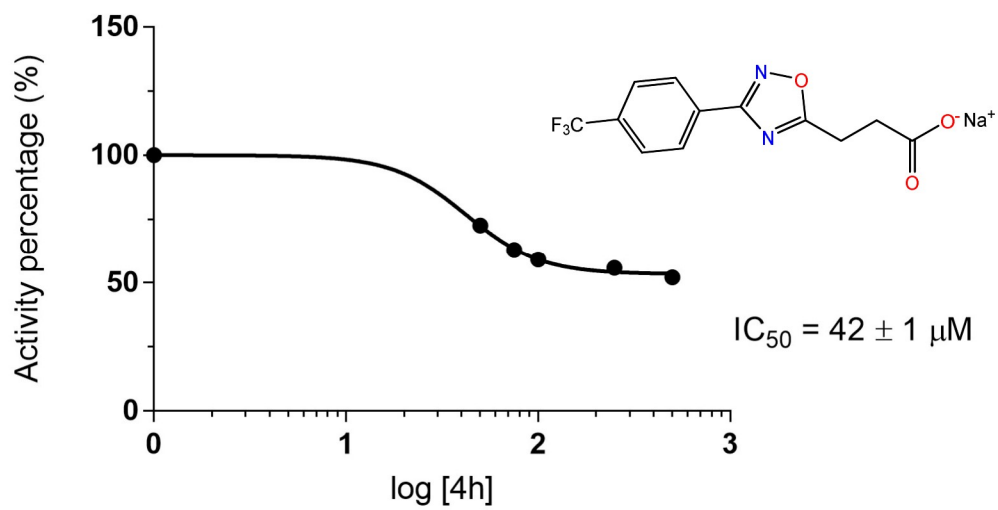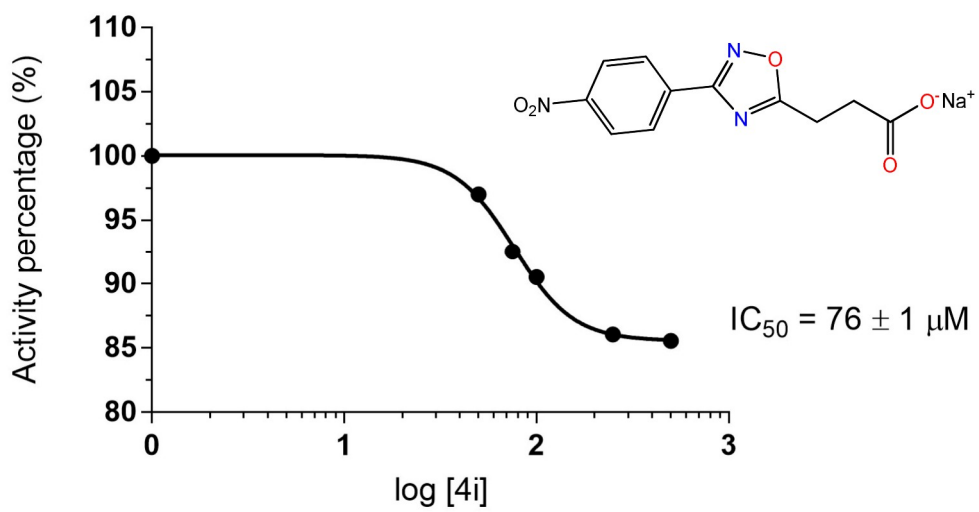

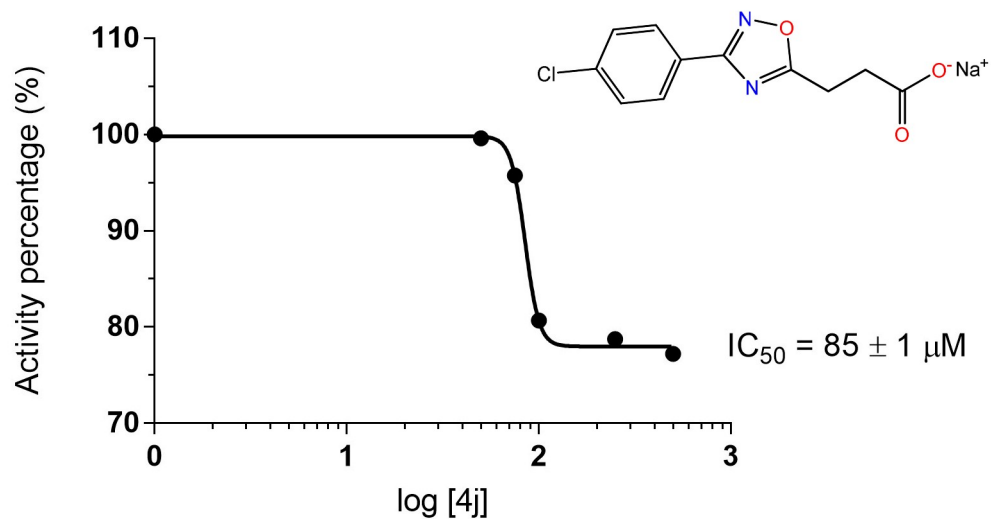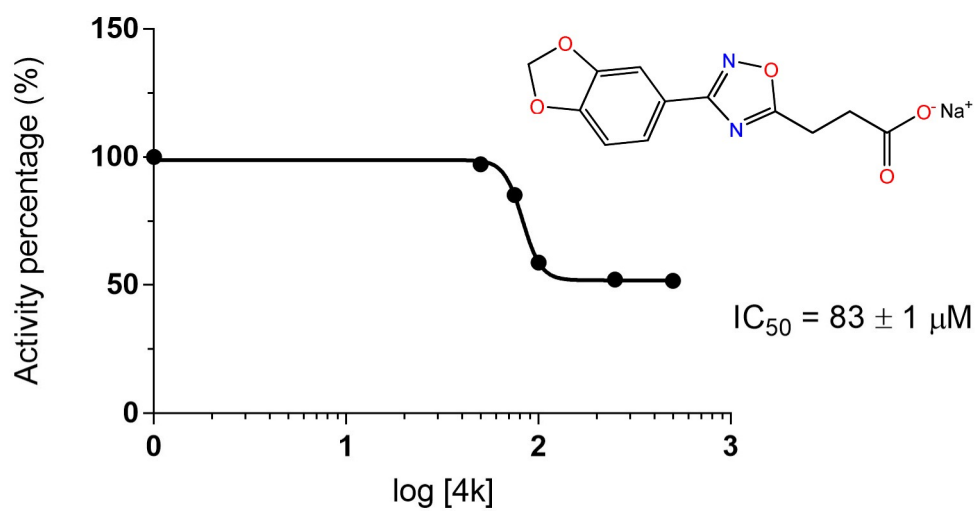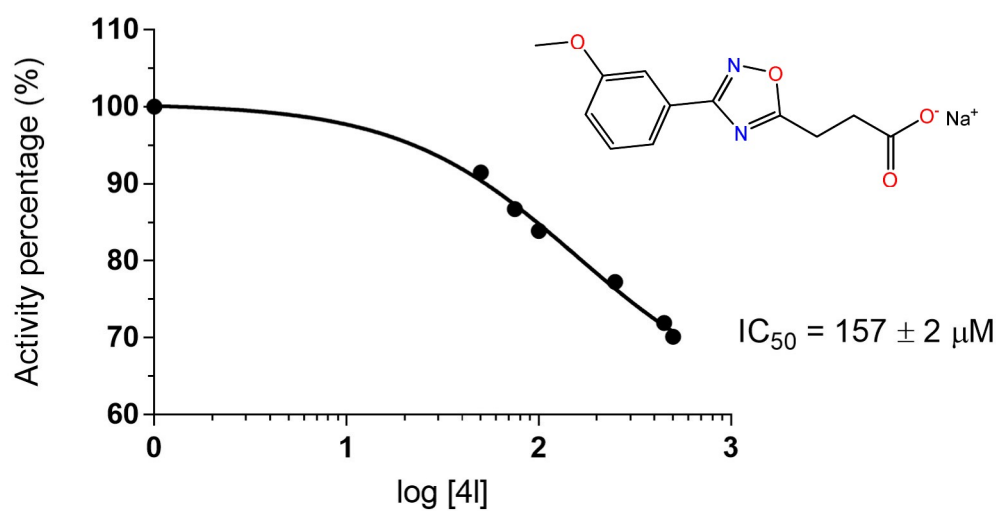

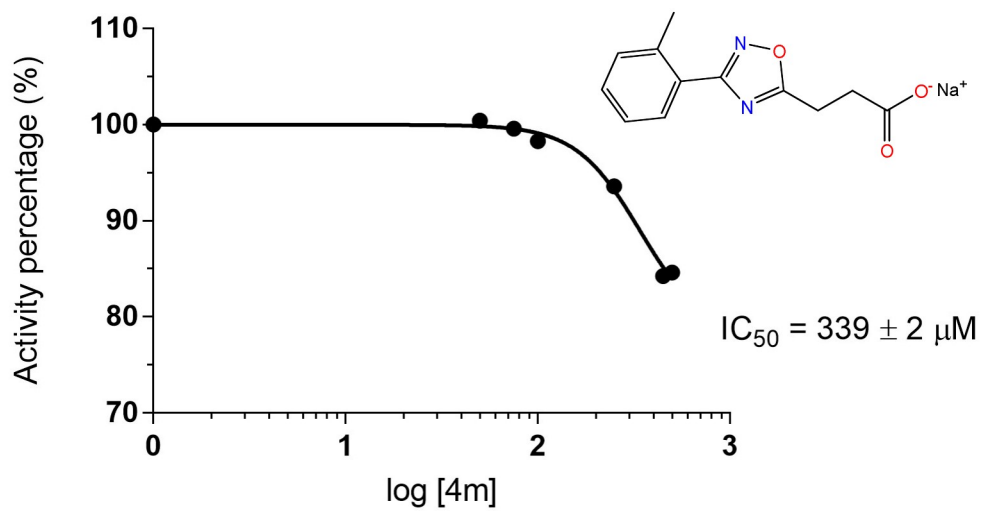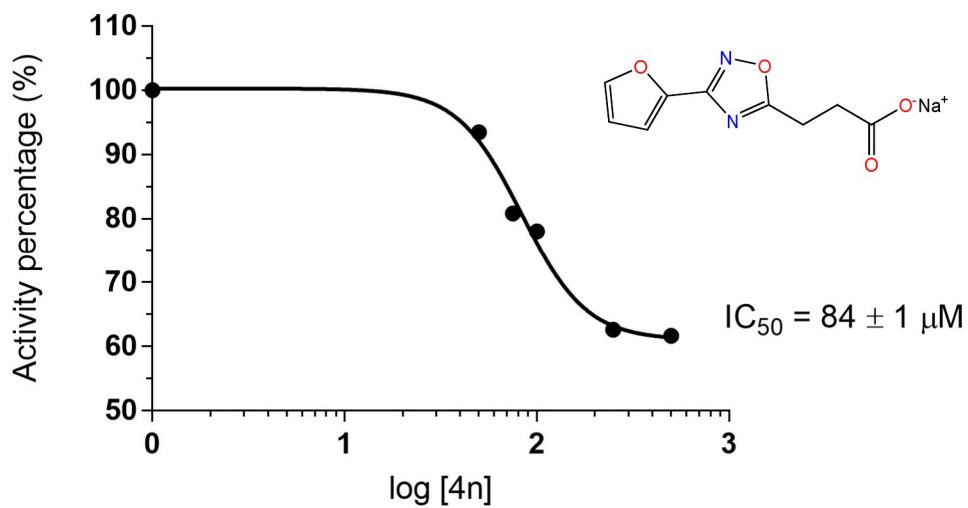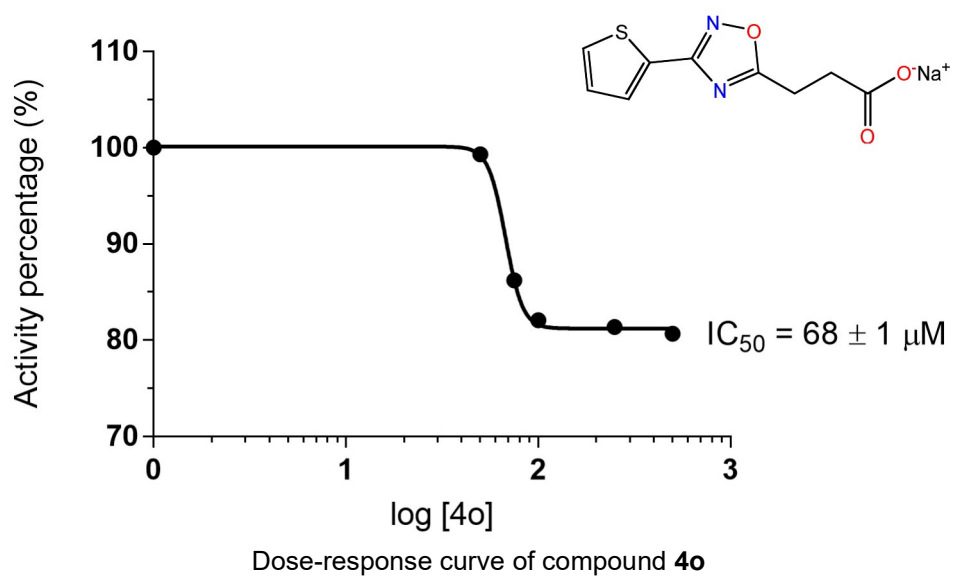



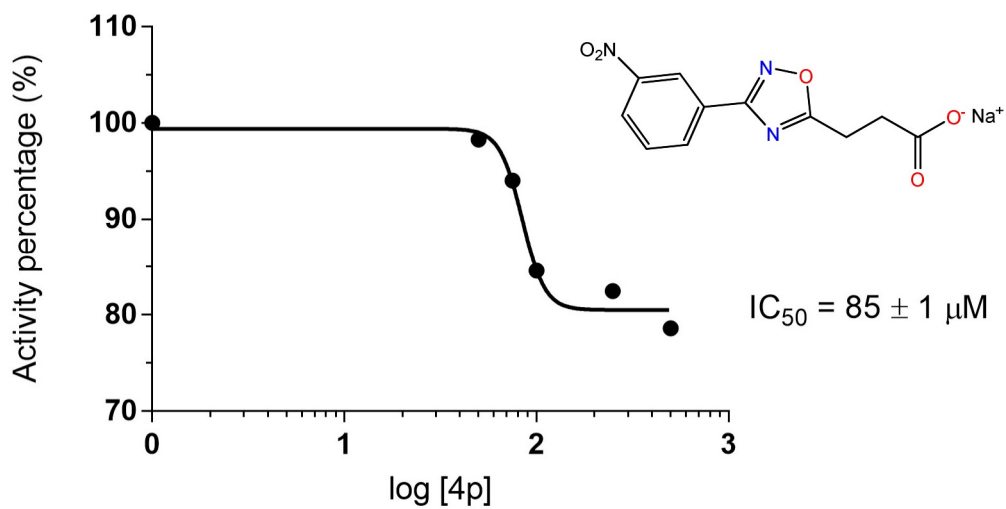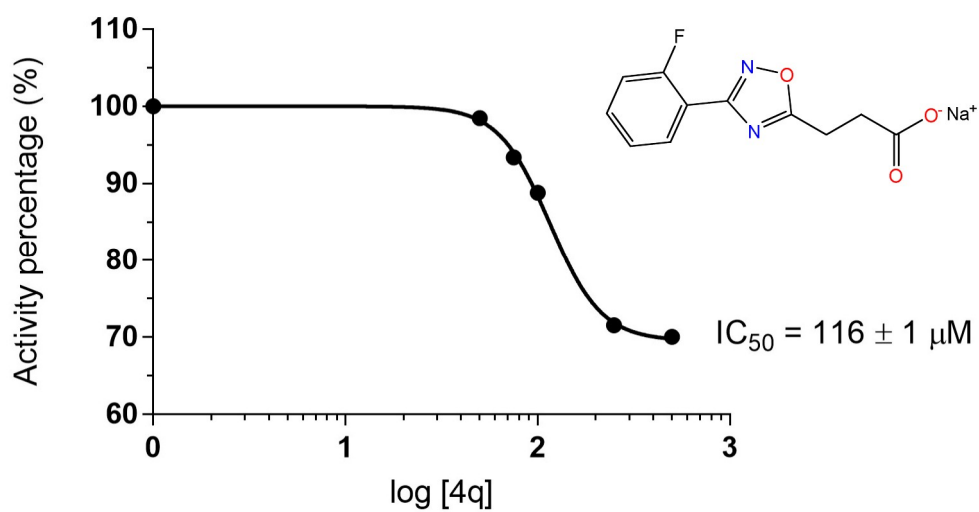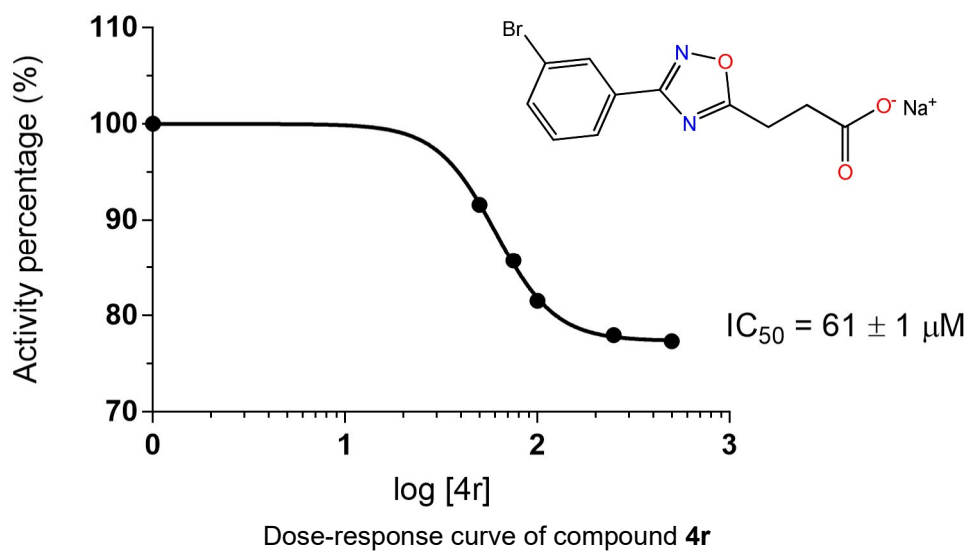

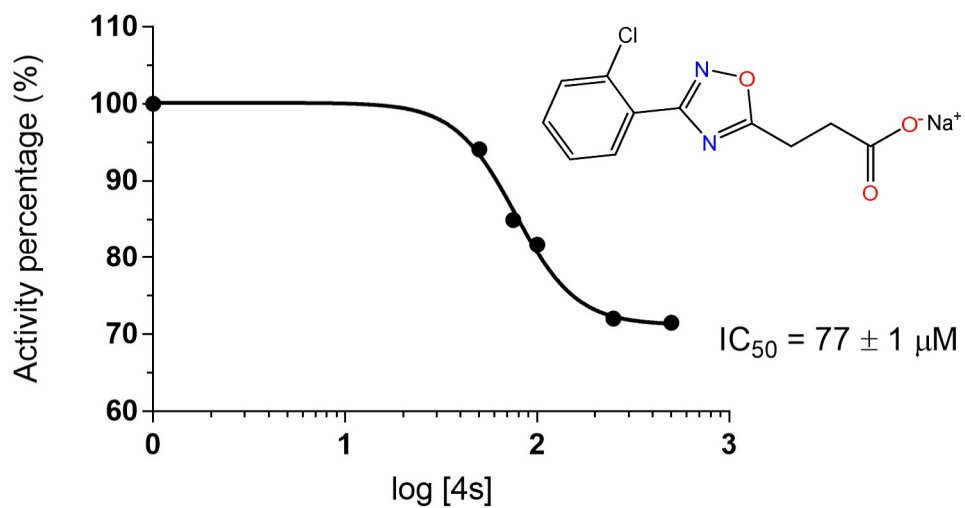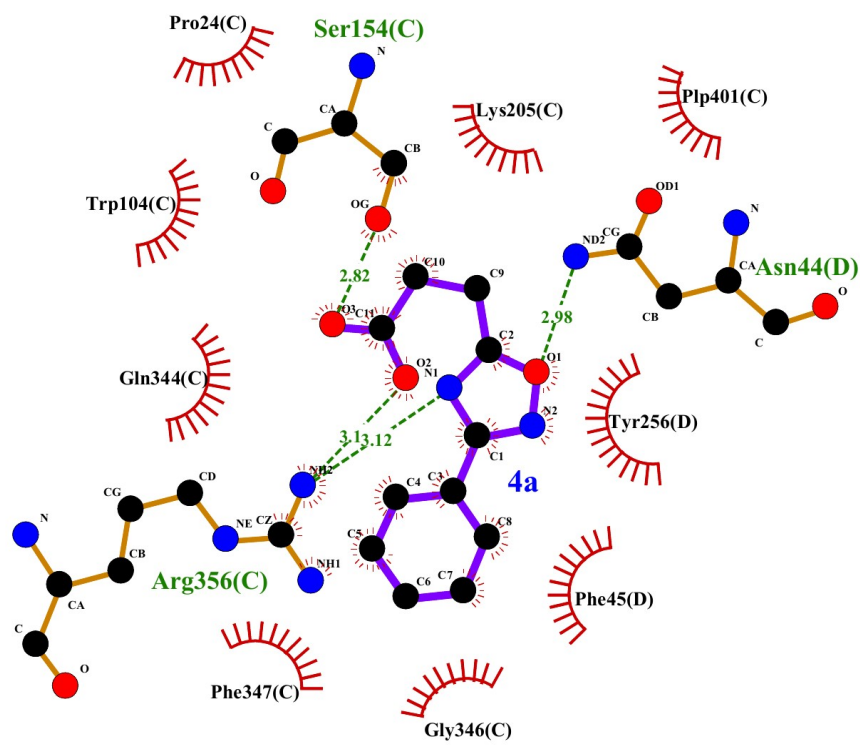

Electrostatic and van der Waals interactions between AeHKT and compound **4a** generated by LigPLOT<sup>+</sup>

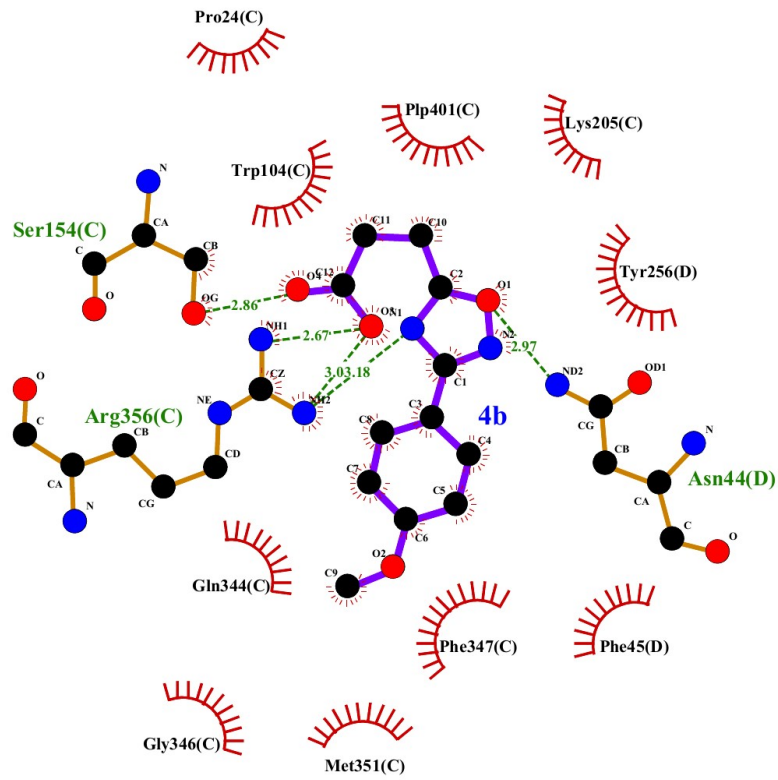

Electrostatic and van der Waals interactions between AeHKT and compound **4b** generated by LigPLOT<sup>+</sup>

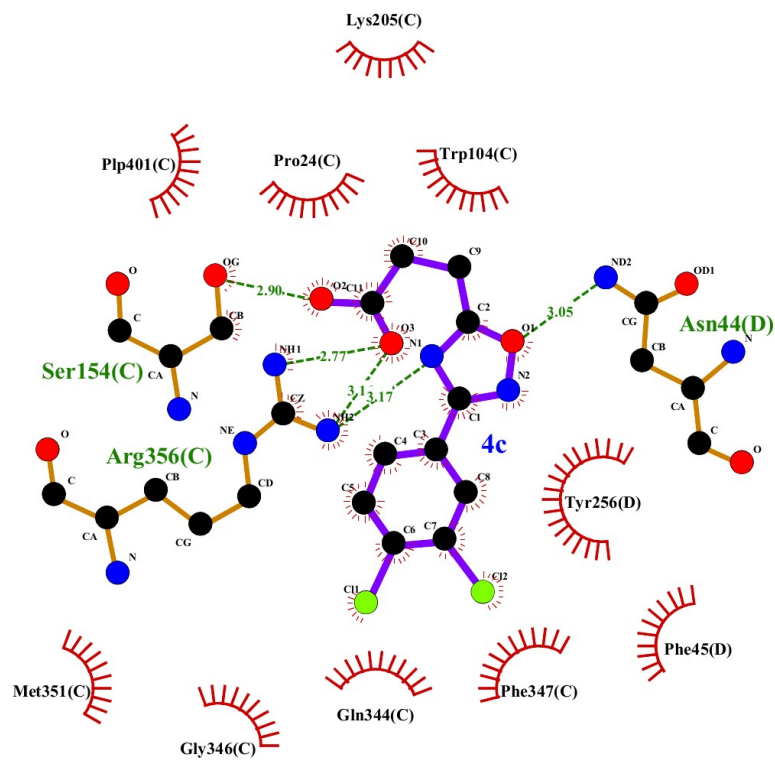

Electrostatic and van der Waals interactions between AeHKT and compound **4c** generated by LigPLOT<sup>+</sup>

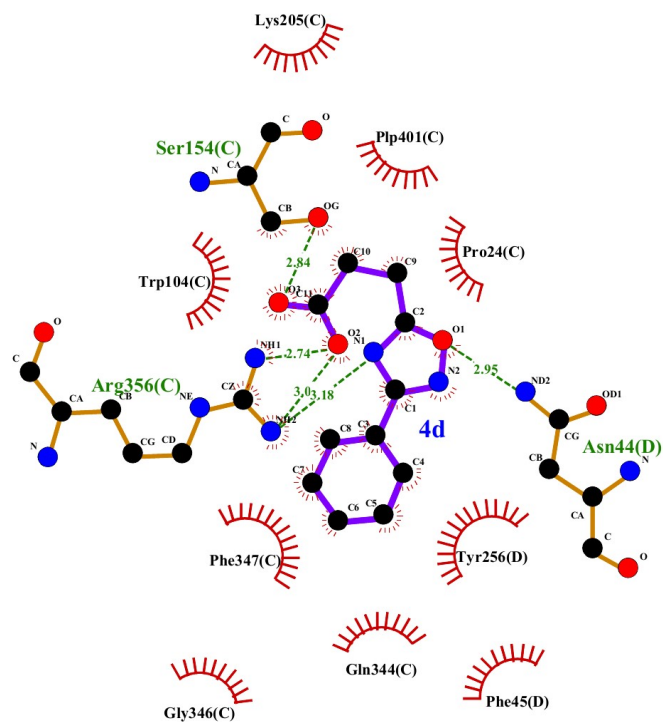

Electrostatic and van der Waals interactions between AeHKT and compound **4d** generated by LigPLOT<sup>+</sup>

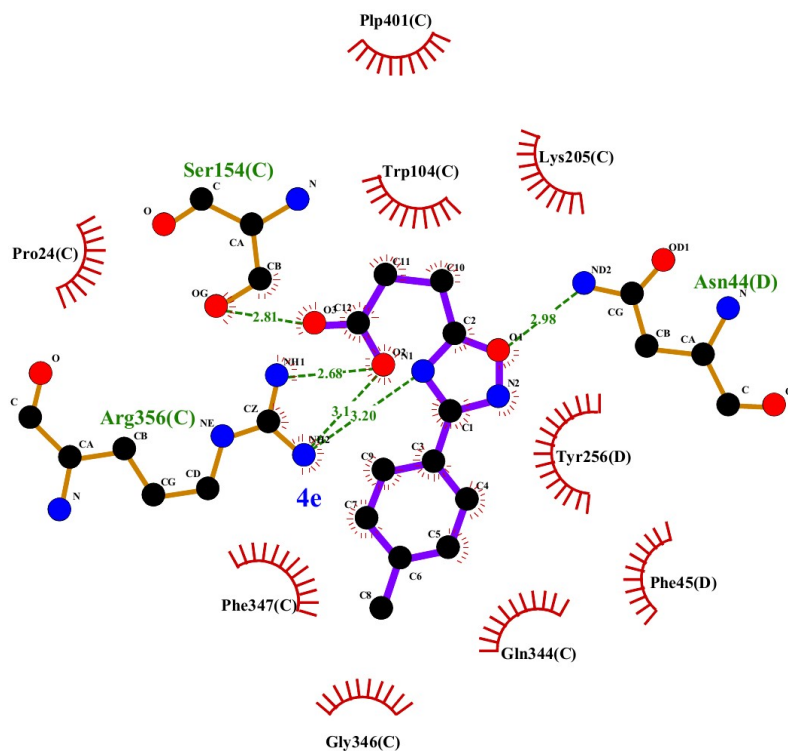

Electrostatic and van der Waals interactions between AeHKT and compound **4e** generated by LigPLOT<sup>+</sup>

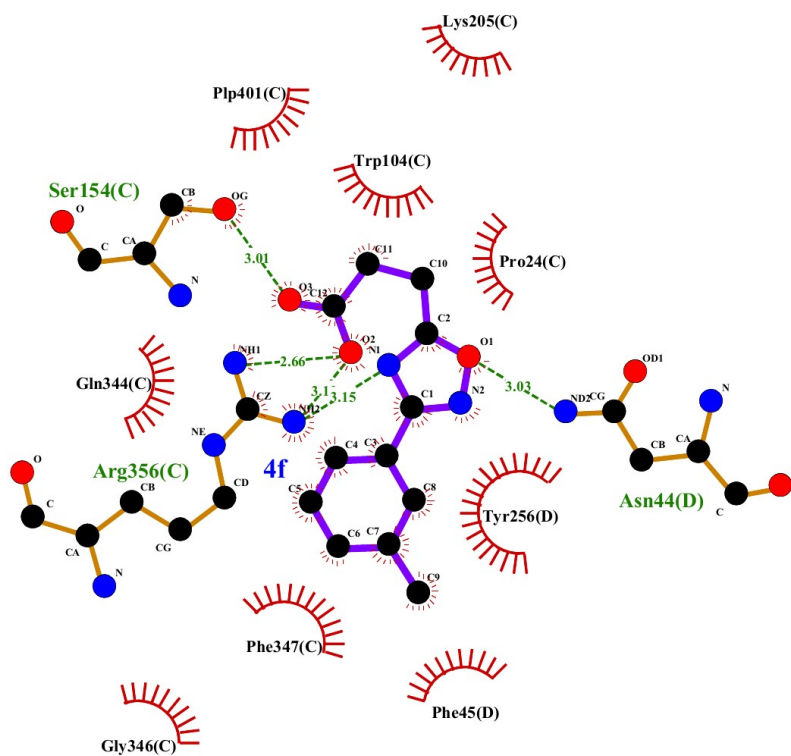

Electrostatic and van der Waals interactions between AeHKT and compound **4f** generated by LigPLOT<sup>+</sup>

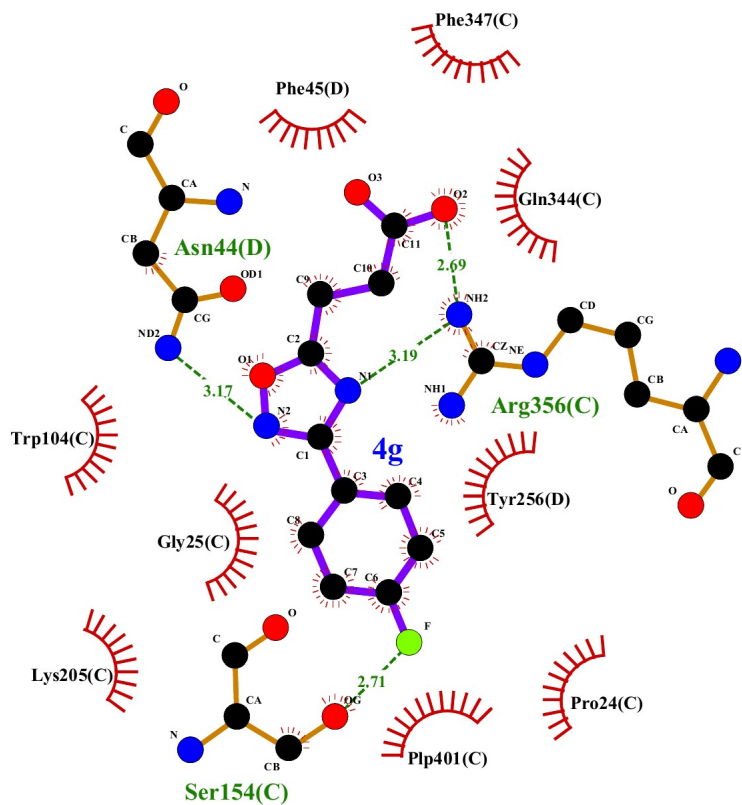

Electrostatic and van der Waals interactions between AeHKT and compound **4g** generated by LigPLOT<sup>+</sup>

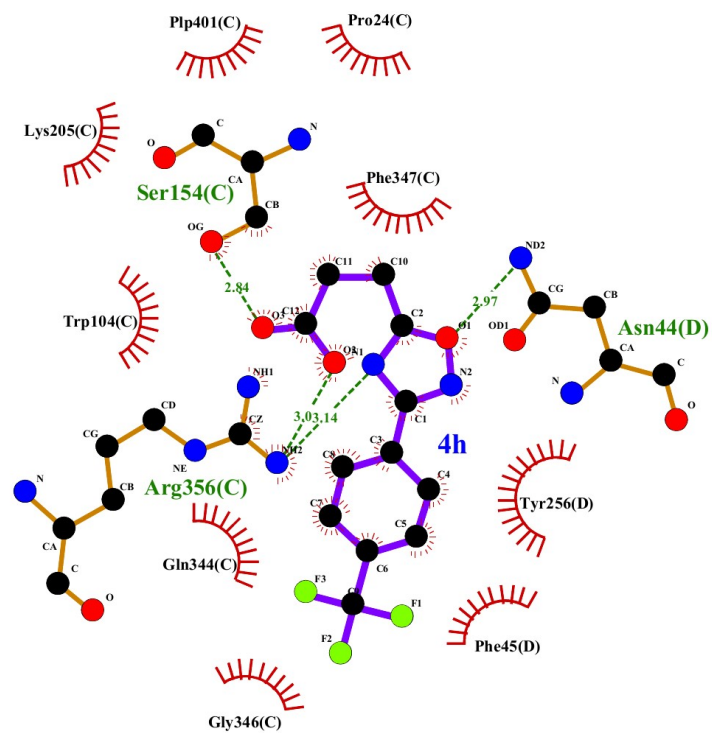

Electrostatic and van der Waals interactions between AeHKT and compound **4h** generated by LigPLOT<sup>+</sup>

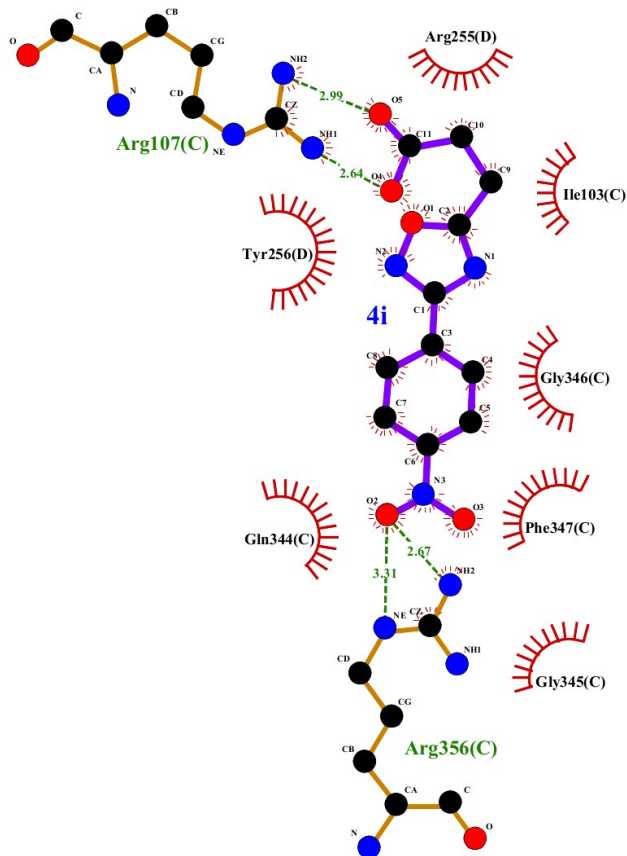

Electrostatic and van der Waals interactions between AeHKT and compound **4i** generated by LigPLOT<sup>+</sup>

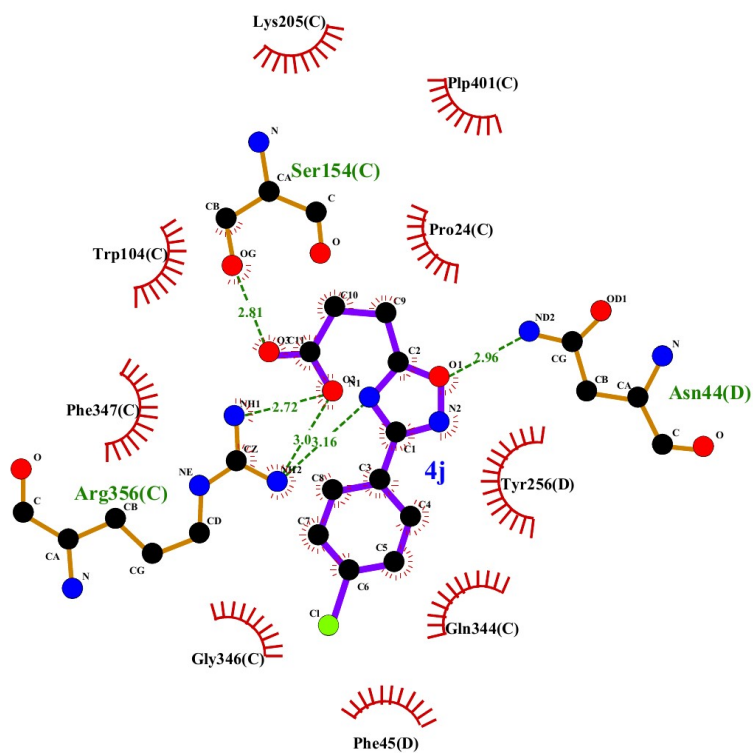

Electrostatic and van der Waals interactions between AeHKT and compound **4j** generated by LigPLOT<sup>+</sup>

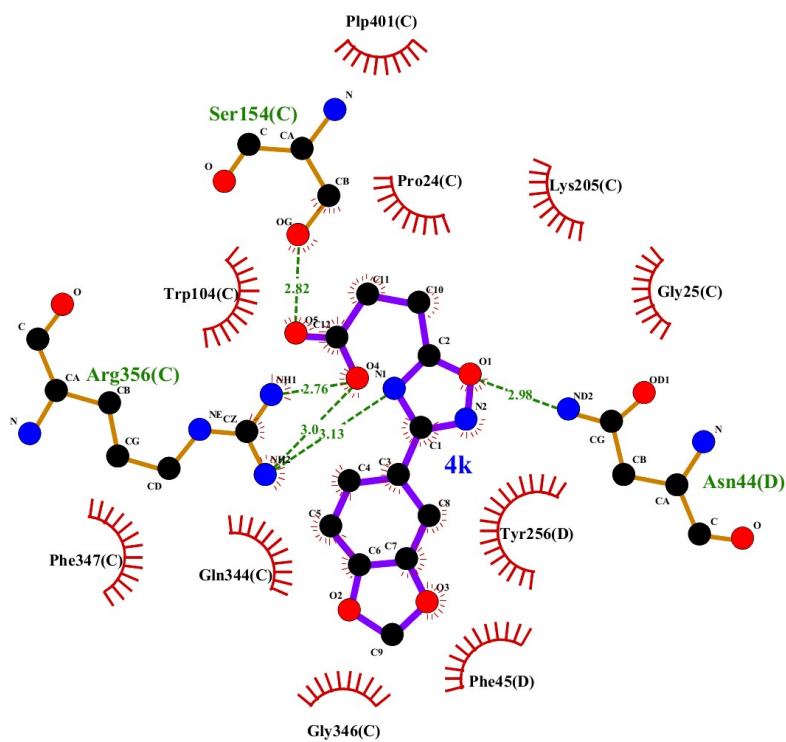

Electrostatic and van der Waals interactions between AeHKT and compound **4k** generated by LigPLOT<sup>+</sup>

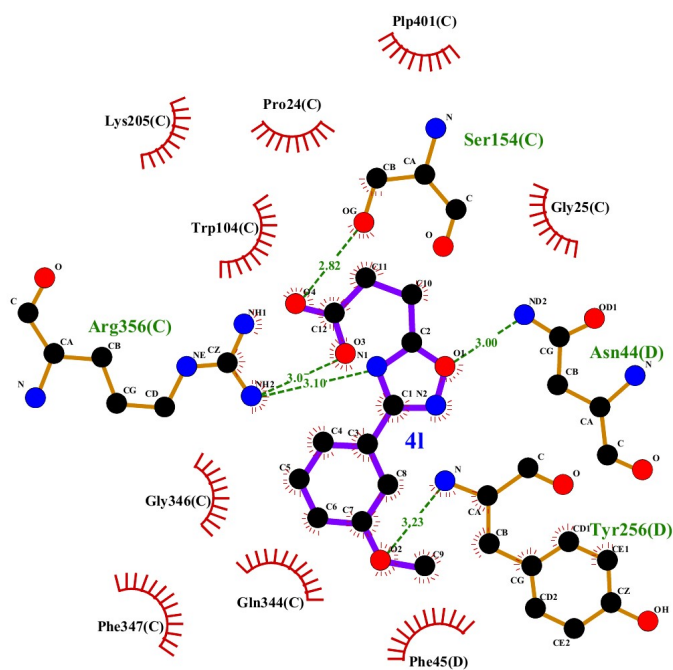

Electrostatic and van der Waals interactions between AeHKT and compound **4l** generated by LigPLOT<sup>+</sup>



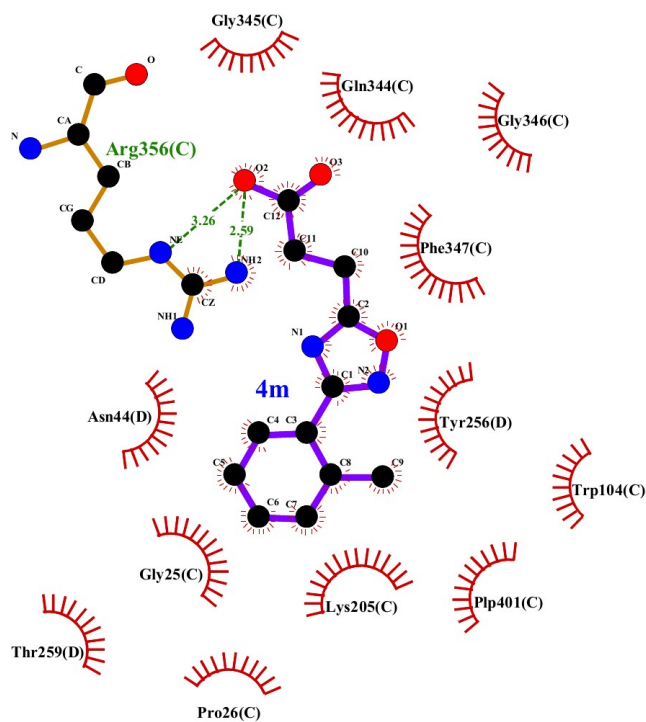

Electrostatic and van der Waals interactions between AeHKT and compound **4m** generated by LigPLOT<sup>+</sup>

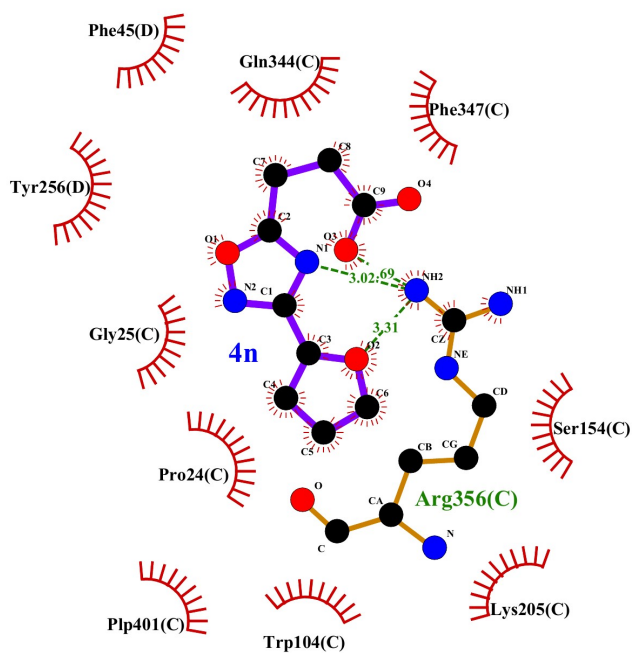

Electrostatic and van der Waals interactions between AeHKT and compound **4n** generated by LigPLOT<sup>+</sup>

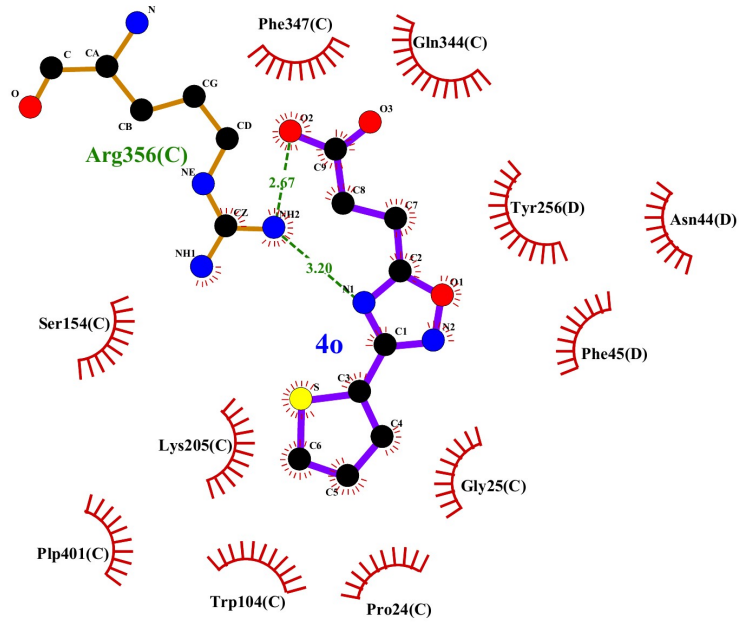

Electrostatic and van der Waals interactions between AeHKT and compound **4o** generated by LigPLOT<sup>+</sup>

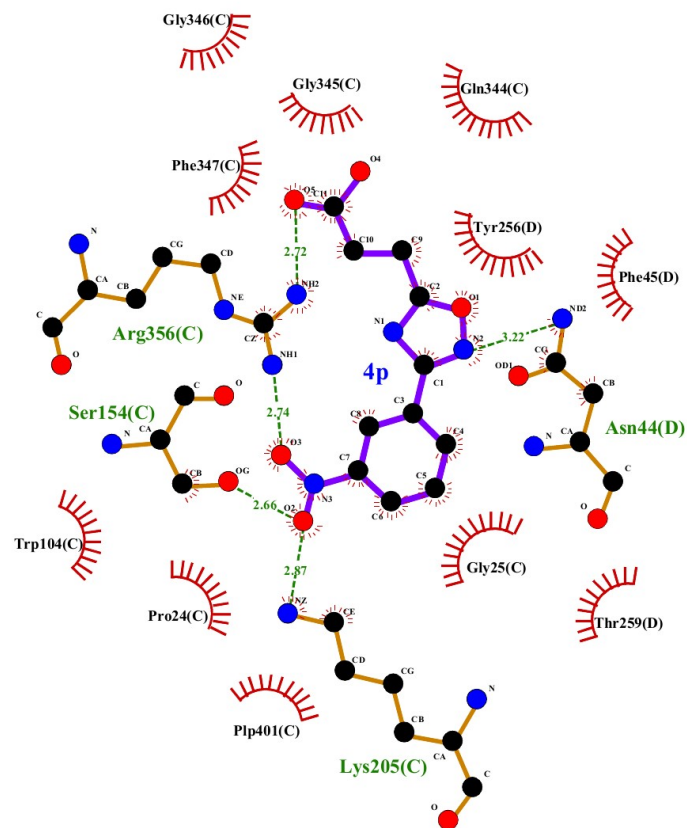

Electrostatic and van der Waals interactions between AeHKT and compound **4p** generated by LigPLOT<sup>+</sup>

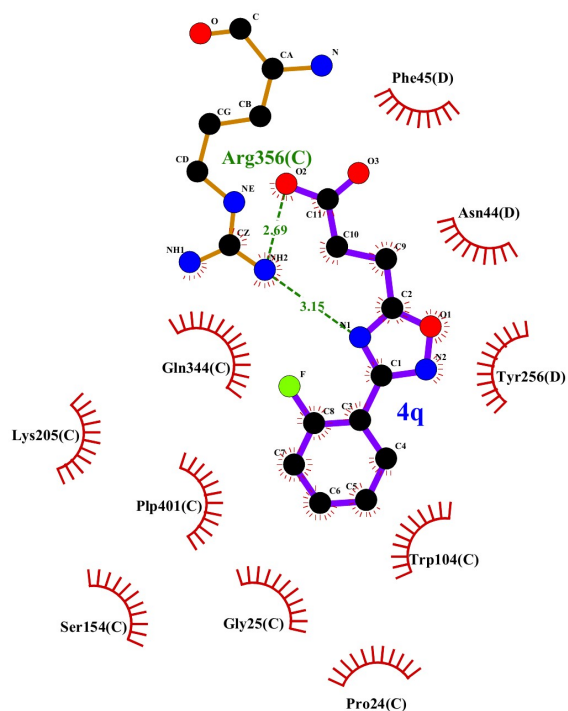

Electrostatic and van der Waals interactions between AeHKT and compound **4q** generated by LigPLOT<sup>+</sup>

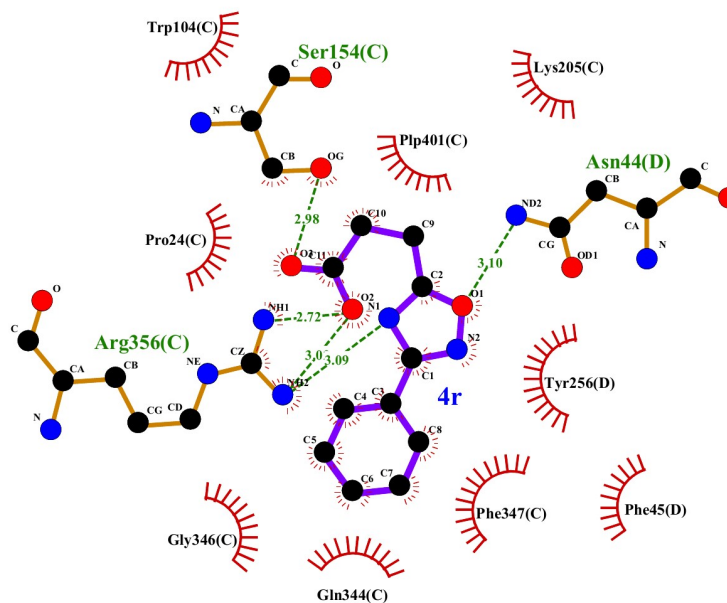

Electrostatic and van der Waals interactions between AeHKT and compound **4r** generated by LigPLOT<sup>+</sup>

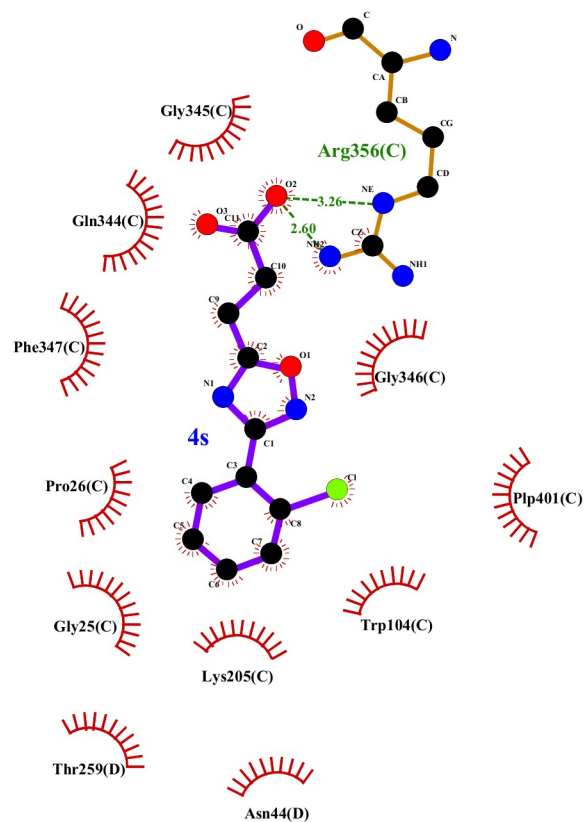

Electrostatic and van der Waals interactions between AeHKT and compound **4s** generated by LigPLOT<sup>+</sup>

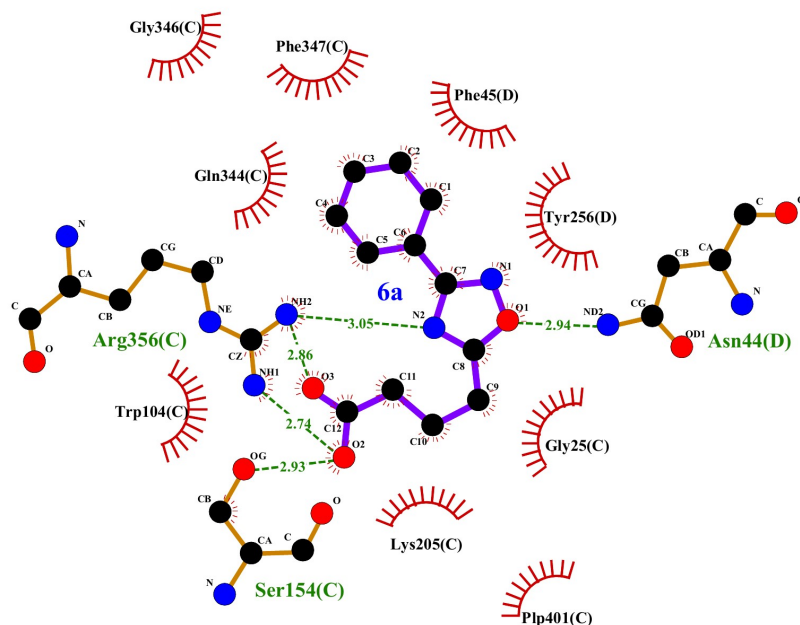

Electrostatic and van der Waals interactions between AeHKT and compound **6a** generated by LigPLOT<sup>+</sup>

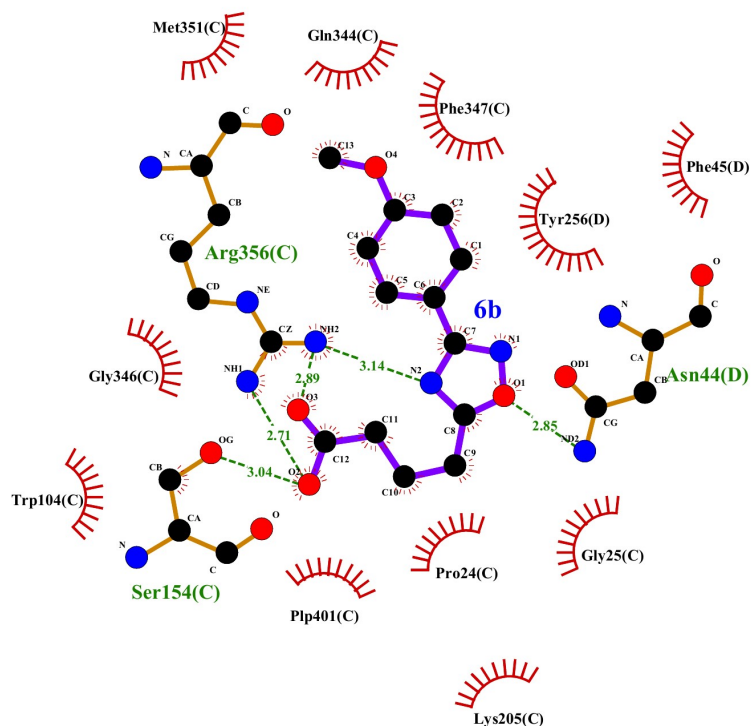

Electrostatic and van der Waals interactions between AeHKT and compound **6b** generated by LigPLOT<sup>+</sup>

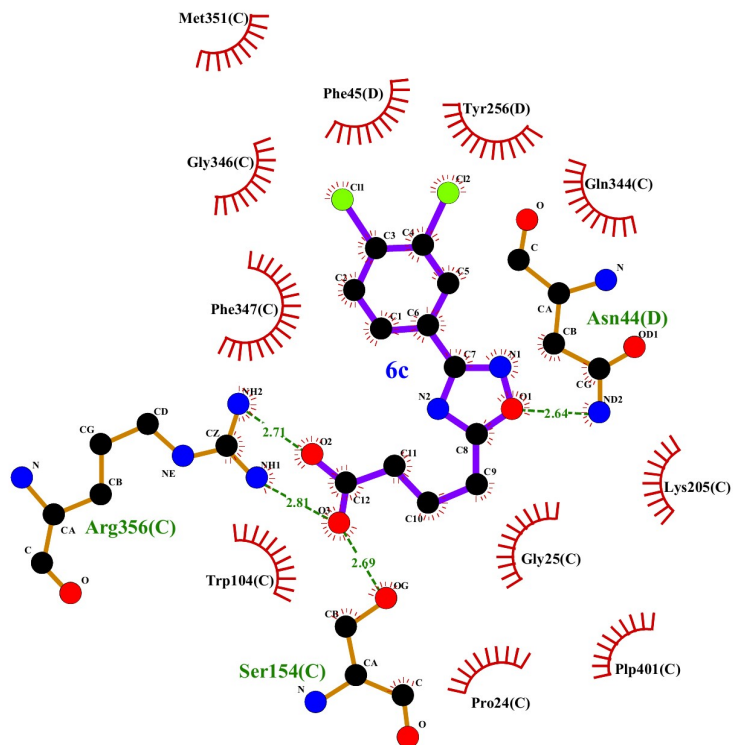

Electrostatic and van der Waals interactions between AeHKT and compound **6c** generated by LigPLOT<sup>+</sup>

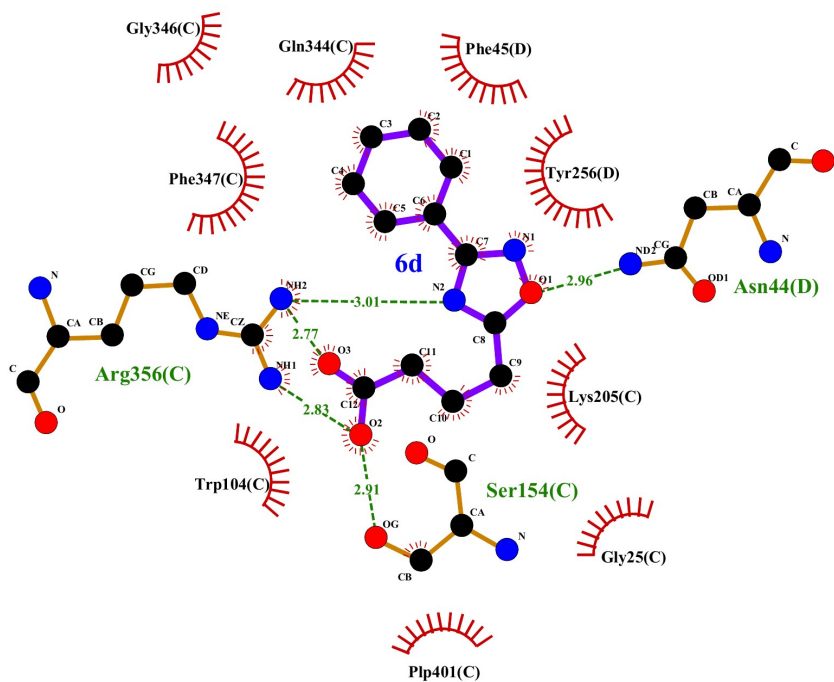

Electrostatic and van der Waals interactions between AeHKT and compound **6d** generated by LigPLOT<sup>+</sup>

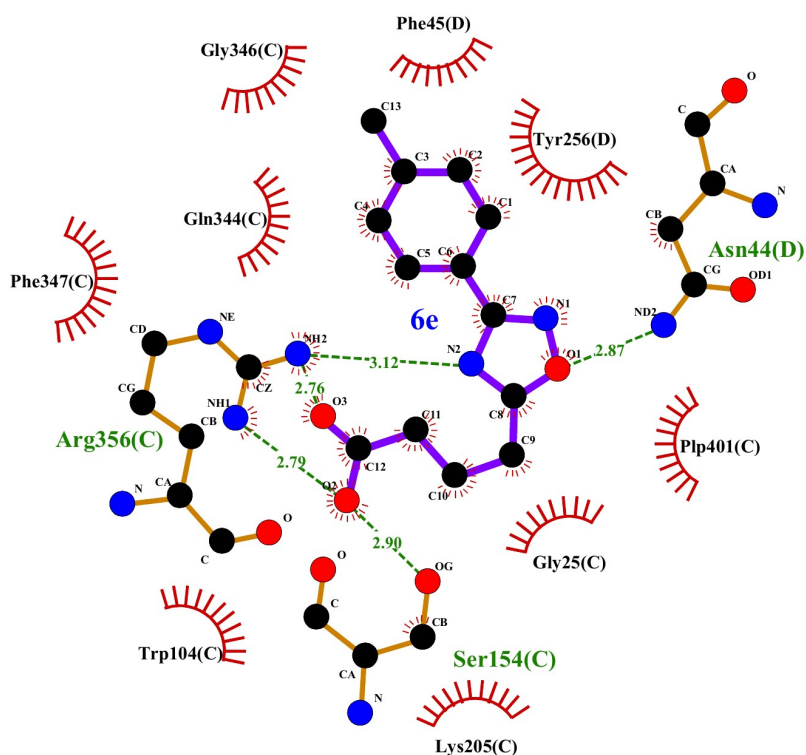

Electrostatic and van der Waals interactions between AeHKT and compound **6e** generated by LigPLOT<sup>+</sup>

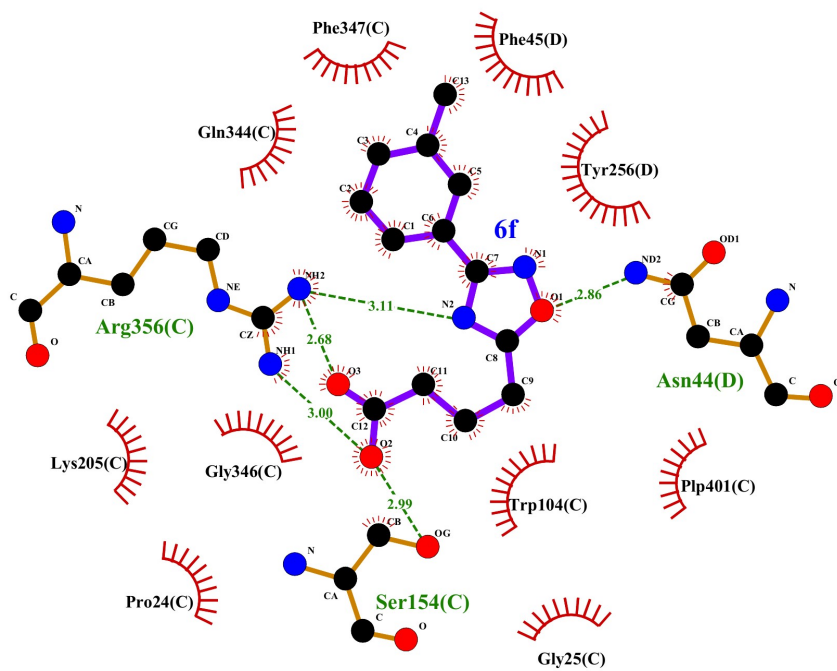

Electrostatic and van der Waals interactions between AeHKT and compound **6f** generated by LigPLOT<sup>+</sup>

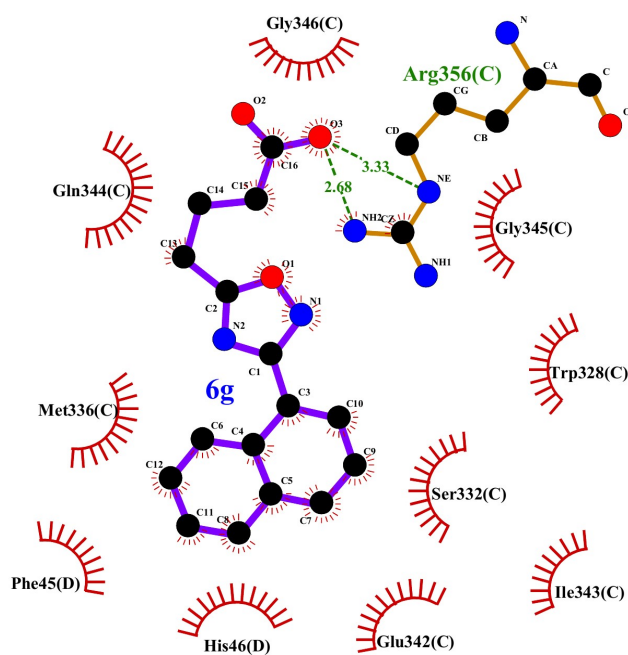

Electrostatic and van der Waals interactions between AeHKT and compound **6g** generated by LigPLOT<sup>+</sup>

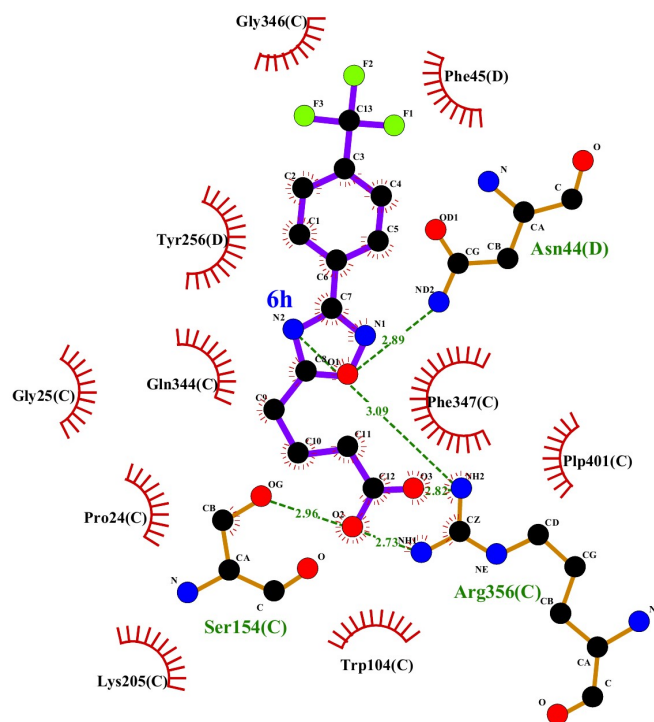

Electrostatic and van der Waals interactions between AeHKT and compound **6h** generated by LigPLOT<sup>+</sup>

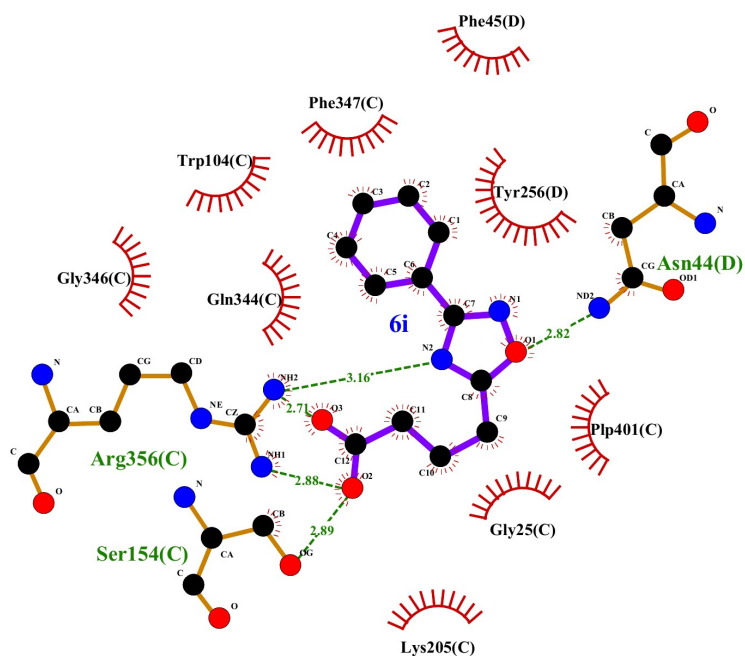

Electrostatic and van der Waals interactions between AeHKT and compound **6i** generated by LigPLOT<sup>+</sup>



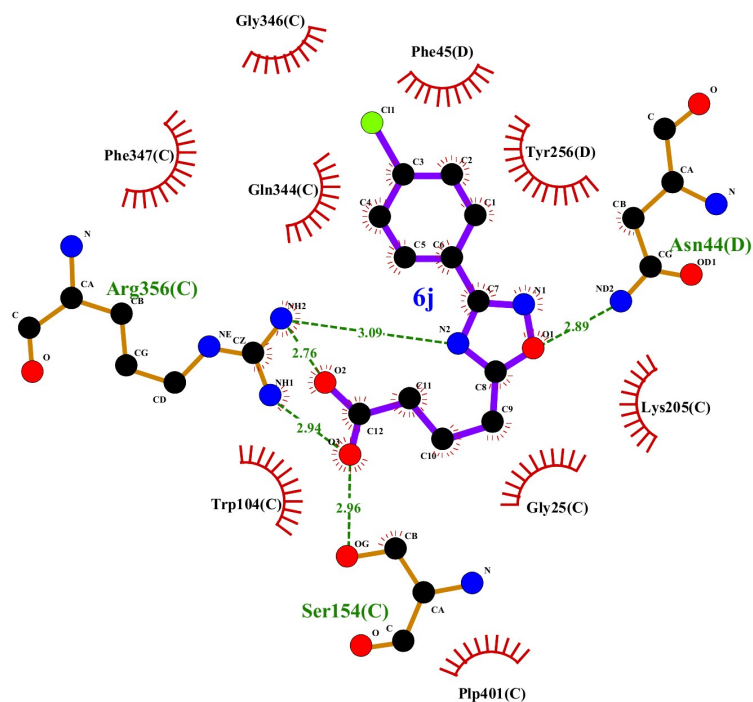

Electrostatic and van der Waals interactions between AeHKT and compound **6j** generated by LigPLOT<sup>+</sup>

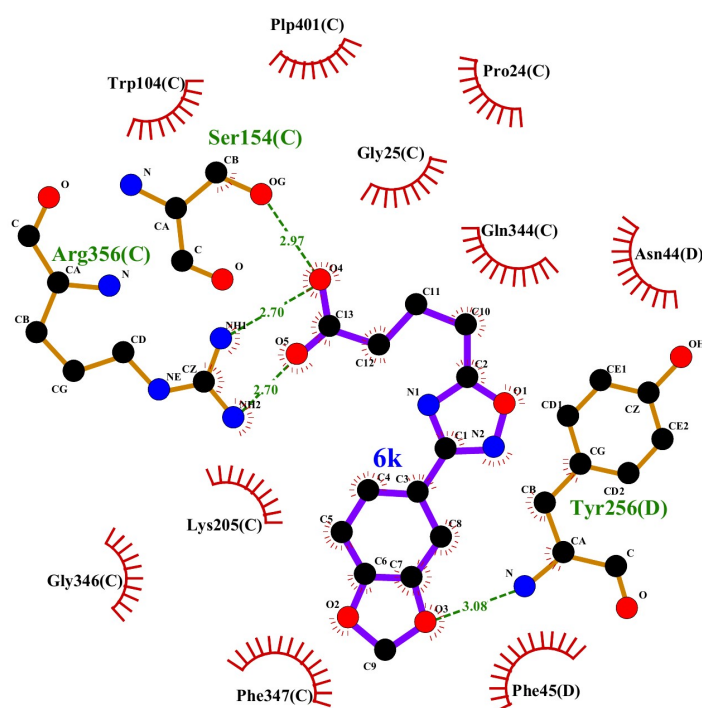

Electrostatic and van der Waals interactions between AeHKT and compound **6k** generated by LigPLOT<sup>+</sup>

Atomic coordinates of lowest energy conformers obtained via molecular docking calculations of compounds 4-OB (validation) and **4a**, **4i**, **4n**, **4m** and **6g** to the HKT enzyme from *Aedes aegypti* (PDB ID 6MFB)

**4-OB inhibitor (placed at the active site)**

|      |    |     |     |       |        |        |         |       |       |        |       |
|------|----|-----|-----|-------|--------|--------|---------|-------|-------|--------|-------|
| ATOM | 1  | CA  | KY1 | D1391 | -2.373 | 25.701 | -15.479 | -0.58 | +0.00 | +0.106 | 0.939 |
| ATOM | 2  | C   | KY1 | D1391 | -2.592 | 24.797 | -14.304 | -0.48 | +0.11 | +0.186 | 0.939 |
| ATOM | 3  | O   | KY1 | D1391 | -3.167 | 25.213 | -13.272 | -0.49 | -0.64 | -0.647 | 0.939 |
| ATOM | 4  | OXT | KY1 | D1391 | -2.179 | 23.633 | -14.421 | -0.66 | -0.44 | -0.647 | 0.939 |
| ATOM | 5  | CB  | KY1 | D1391 | -1.811 | 27.015 | -15.013 | -0.57 | -0.01 | +0.081 | 0.939 |
| ATOM | 6  | C1  | KY1 | D1391 | -2.830 | 28.128 | -14.996 | -0.40 | -0.05 | +0.175 | 0.939 |
| ATOM | 7  | O2  | KY1 | D1391 | -2.975 | 28.713 | -16.050 | -0.38 | +0.11 | -0.291 | 0.939 |
| ATOM | 8  | CD2 | KY1 | D1391 | -3.670 | 28.524 | -13.793 | -0.43 | -0.00 | +0.050 | 0.939 |
| ATOM | 9  | CG  | KY1 | D1391 | -3.576 | 29.807 | -13.213 | -0.50 | -0.00 | +0.052 | 0.939 |
| ATOM | 10 | CD1 | KY1 | D1391 | -4.378 | 30.147 | -12.108 | -0.53 | +0.00 | +0.017 | 0.939 |
| ATOM | 11 | CE1 | KY1 | D1391 | -5.275 | 29.224 | -11.557 | -0.48 | +0.00 | +0.002 | 0.939 |
| ATOM | 12 | CZ  | KY1 | D1391 | -5.363 | 27.956 | -12.132 | -0.45 | +0.00 | +0.000 | 0.939 |
| ATOM | 13 | CE2 | KY1 | D1391 | -4.575 | 27.619 | -13.237 | -0.45 | +0.00 | +0.004 | 0.939 |
| ATOM | 14 | N1  | KY1 | D1391 | -2.727 | 30.751 | -13.694 | -0.25 | +0.12 | -0.398 | 0.939 |
| ATOM | 15 | H12 | KY1 | D1391 | -2.194 | 30.610 | -14.552 | -0.43 | -0.11 | +0.156 | 0.939 |
| ATOM | 16 | H11 | KY1 | D1391 | -2.636 | 31.621 | -13.168 | -0.46 | -0.05 | +0.156 | 0.939 |
| END  |    |     |     |       |        |        |         |       |       |        |       |

**4-OB inhibitor (placed outside of the active site)**

|      |   |     |     |       |        |        |         |       |       |        |        |
|------|---|-----|-----|-------|--------|--------|---------|-------|-------|--------|--------|
| ATOM | 1 | CA  | KY1 | D1391 | -3.012 | 25.831 | -15.523 | -0.53 | -0.01 | +0.106 | 11.269 |
| ATOM | 2 | C   | KY1 | D1391 | -2.765 | 24.900 | -14.375 | -0.51 | +0.09 | +0.186 | 11.269 |
| ATOM | 3 | O   | KY1 | D1391 | -2.179 | 23.806 | -14.549 | -0.67 | -0.39 | -0.647 | 11.269 |
| ATOM | 4 | OXT | KY1 | D1391 | -3.166 | 25.279 | -13.265 | -0.49 | -0.64 | -0.647 | 11.269 |
| ATOM | 5 | CB  | KY1 | D1391 | -2.148 | 27.053 | -15.382 | -0.56 | -0.01 | +0.081 | 11.269 |
| ATOM | 6 | C1  | KY1 | D1391 | -2.938 | 28.319 | -15.153 | -0.41 | -0.05 | +0.175 | 11.269 |
| ATOM | 7 | O2  | KY1 | D1391 | -2.965 | 29.088 | -16.092 | -0.38 | +0.11 | -0.291 | 11.269 |
| ATOM | 8 | CD2 | KY1 | D1391 | -3.691 | 28.660 | -13.878 | -0.44 | -0.00 | +0.050 | 11.269 |
| ATOM | 9 | CE2 | KY1 | D1391 | -4.505 | 27.706 | -13.265 | -0.46 | +0.00 | +0.004 | 11.269 |

|      |    |     |     |       |        |        |         |       |       |        |        |
|------|----|-----|-----|-------|--------|--------|---------|-------|-------|--------|--------|
| ATOM | 10 | CZ  | KY1 | D1391 | -5.212 | 27.992 | -12.092 | -0.47 | +0.00 | +0.000 | 11.269 |
| ATOM | 11 | CE1 | KY1 | D1391 | -5.133 | 29.254 | -11.505 | -0.49 | +0.00 | +0.002 | 11.269 |
| ATOM | 12 | CD1 | KY1 | D1391 | -4.327 | 30.225 | -12.112 | -0.53 | +0.00 | +0.017 | 11.269 |
| ATOM | 13 | CG  | KY1 | D1391 | -3.606 | 29.938 | -13.286 | -0.51 | -0.00 | +0.052 | 11.269 |
| ATOM | 14 | N1  | KY1 | D1391 | -2.843 | 30.926 | -13.818 | -0.24 | +0.10 | -0.398 | 11.269 |
| ATOM | 15 | H12 | KY1 | D1391 | -2.735 | 31.786 | -13.280 | -0.45 | -0.03 | +0.156 | 11.269 |
| ATOM | 16 | H11 | KY1 | D1391 | -2.389 | 30.827 | -14.726 | -0.42 | -0.09 | +0.156 | 11.269 |
| END  |    |     |     |       |        |        |         |       |       |        |        |

### Compound 4a

|        |      |   |    |   |        |        |         |       |       |        |       |
|--------|------|---|----|---|--------|--------|---------|-------|-------|--------|-------|
| HETATM | 7000 | N | 4A | 1 | -3.827 | 26.733 | -12.824 | -0.68 | -0.09 | -0.203 | 9.484 |
| HETATM | 7001 | N | 4A | 1 | -5.188 | 28.491 | -12.905 | -0.79 | -0.02 | -0.105 | 9.484 |
| HETATM | 7002 | C | 4A | 1 | -4.721 | 27.480 | -12.145 | -0.32 | +0.05 | +0.191 | 9.484 |
| HETATM | 7003 | C | 4A | 1 | -3.782 | 27.341 | -14.024 | -0.30 | +0.01 | +0.185 | 9.484 |
| HETATM | 7004 | O | 4A | 1 | -4.590 | 28.375 | -14.052 | -0.80 | -0.01 | -0.195 | 9.484 |
| HETATM | 7005 | C | 4A | 1 | -5.135 | 27.223 | -10.749 | -0.47 | +0.01 | +0.038 | 9.484 |
| HETATM | 7006 | C | 4A | 1 | -4.271 | 26.558 | -9.860  | -0.43 | +0.00 | +0.003 | 9.484 |
| HETATM | 7007 | C | 4A | 1 | -4.668 | 26.319 | -8.542  | -0.48 | +0.00 | +0.000 | 9.484 |
| HETATM | 7008 | C | 4A | 1 | -5.923 | 26.740 | -8.098  | -0.37 | +0.00 | +0.000 | 9.484 |
| HETATM | 7009 | C | 4A | 1 | -6.788 | 27.401 | -8.974  | -0.42 | +0.00 | +0.000 | 9.484 |
| HETATM | 7010 | C | 4A | 1 | -6.398 | 27.643 | -10.295 | -0.37 | +0.00 | +0.003 | 9.484 |
| HETATM | 7011 | C | 4A | 1 | -2.926 | 26.896 | -15.167 | -0.53 | -0.01 | +0.085 | 9.484 |
| HETATM | 7012 | C | 4A | 1 | -3.205 | 25.426 | -15.509 | -0.53 | -0.00 | +0.106 | 9.484 |
| HETATM | 7013 | C | 4A | 1 | -2.511 | 24.462 | -14.583 | -0.53 | +0.09 | +0.186 | 9.484 |
| HETATM | 7014 | O | 4A | 1 | -3.163 | 24.004 | -13.498 | -0.46 | -0.58 | -0.647 | 9.484 |
| HETATM | 7015 | O | 4A | 1 | -1.369 | 24.089 | -14.801 | -0.49 | -0.35 | -0.647 | 9.484 |
| END    |      |   |    |   |        |        |         |       |       |        |       |

### Compound 4i

|        |      |   |    |   |         |        |         |       |       |        |       |
|--------|------|---|----|---|---------|--------|---------|-------|-------|--------|-------|
| HETATM | 7000 | N | 4i | 1 | -8.832  | 24.233 | -8.176  | -0.18 | -0.03 | -0.203 | 6.815 |
| HETATM | 7001 | N | 4i | 1 | -9.425  | 26.362 | -8.428  | -0.87 | -0.04 | -0.105 | 6.815 |
| HETATM | 7002 | C | 4i | 1 | -8.396  | 25.506 | -8.264  | -0.26 | +0.03 | +0.191 | 6.815 |
| HETATM | 7003 | C | 4i | 1 | -10.167 | 24.367 | -8.293  | -0.26 | +0.04 | +0.185 | 6.815 |
| HETATM | 7004 | O | 4i | 1 | -10.496 | 25.627 | -8.442  | -0.68 | -0.09 | -0.195 | 6.815 |
| HETATM | 7005 | C | 4i | 1 | -6.977  | 25.911 | -8.187  | -0.31 | +0.00 | +0.038 | 6.815 |
| HETATM | 7006 | C | 4i | 1 | -6.275  | 25.815 | -6.975  | -0.34 | -0.00 | +0.005 | 6.815 |
| HETATM | 7007 | C | 4i | 1 | -4.932  | 26.197 | -6.903  | -0.32 | -0.00 | +0.024 | 6.815 |
| HETATM | 7008 | C | 4i | 1 | -4.265  | 26.682 | -8.044  | -0.38 | +0.02 | +0.127 | 6.815 |
| HETATM | 7009 | C | 4i | 1 | -4.972  | 26.778 | -9.256  | -0.44 | +0.01 | +0.024 | 6.815 |
| HETATM | 7010 | C | 4i | 1 | -6.316  | 26.396 | -9.326  | -0.38 | +0.00 | +0.005 | 6.815 |
| HETATM | 7011 | N | 4i | 1 | -2.893  | 27.072 | -7.975  | -0.42 | -0.04 | -0.114 | 6.815 |
| HETATM | 7012 | O | 4i | 1 | -2.071  | 26.512 | -8.637  | -0.60 | -0.48 | -0.532 | 6.815 |
| HETATM | 7013 | O | 4i | 1 | -2.520  | 28.054 | -7.182  | -0.58 | -0.14 | -0.532 | 6.815 |
| HETATM | 7014 | C | 4i | 1 | -11.138 | 23.229 | -8.260  | -0.26 | +0.02 | +0.085 | 6.815 |
| HETATM | 7015 | C | 4i | 1 | -12.020 | 23.238 | -9.514  | -0.32 | +0.04 | +0.106 | 6.815 |
| HETATM | 7016 | C | 4i | 1 | -11.278 | 22.837 | -10.763 | -0.35 | +0.11 | +0.186 | 6.815 |
| HETATM | 7017 | O | 4i | 1 | -11.145 | 21.531 | -11.064 | -0.48 | -0.56 | -0.647 | 6.815 |
| HETATM | 7018 | O | 4i | 1 | -10.794 | 23.677 | -11.506 | -0.58 | -0.46 | -0.647 | 6.815 |

END

### Compound 4m

|        |      |   |    |   |        |        |         |       |       |        |       |
|--------|------|---|----|---|--------|--------|---------|-------|-------|--------|-------|
| HETATM | 7000 | N | 4m | 1 | -4.686 | 27.588 | -11.962 | -0.30 | -0.05 | -0.203 | 4.050 |
| HETATM | 7001 | N | 4m | 1 | -4.173 | 25.563 | -12.707 | -0.90 | -0.07 | -0.105 | 4.050 |
| HETATM | 7002 | C | 4m | 1 | -4.186 | 26.882 | -12.995 | -0.32 | +0.05 | +0.190 | 4.050 |
| HETATM | 7003 | C | 4m | 1 | -4.971 | 26.638 | -11.053 | -0.38 | +0.06 | +0.185 | 4.050 |
| HETATM | 7004 | O | 4m | 1 | -4.661 | 25.452 | -11.509 | -0.52 | -0.11 | -0.195 | 4.050 |
| HETATM | 7005 | C | 4m | 1 | -3.697 | 27.442 | -14.296 | -0.44 | -0.00 | +0.034 | 4.050 |
| HETATM | 7006 | C | 4m | 1 | -3.799 | 28.841 | -14.464 | -0.42 | -0.00 | +0.003 | 4.050 |
| HETATM | 7007 | C | 4m | 1 | -3.376 | 29.464 | -15.637 | -0.44 | -0.00 | +0.000 | 4.050 |

|             |   |    |   |        |        |         |       |       |        |       |
|-------------|---|----|---|--------|--------|---------|-------|-------|--------|-------|
| HETATM 7008 | C | 4m | 1 | -2.839 | 28.712 | -16.672 | -0.54 | +0.00 | -0.000 | 4.050 |
| HETATM 7009 | C | 4m | 1 | -2.720 | 27.331 | -16.542 | -0.42 | +0.00 | -0.004 | 4.050 |
| HETATM 7010 | C | 4m | 1 | -3.138 | 26.669 | -15.371 | -0.52 | +0.00 | -0.019 | 4.050 |
| HETATM 7011 | C | 4m | 1 | -2.949 | 25.169 | -15.368 | -0.66 | +0.00 | +0.031 | 4.050 |
| HETATM 7012 | C | 4m | 1 | -5.556 | 26.909 | -9.703  | -0.47 | +0.02 | +0.085 | 4.050 |
| HETATM 7013 | C | 4m | 1 | -4.748 | 26.194 | -8.611  | -0.46 | +0.02 | +0.106 | 4.050 |
| HETATM 7014 | C | 4m | 1 | -3.445 | 26.882 | -8.293  | -0.34 | +0.07 | +0.186 | 4.050 |
| HETATM 7015 | O | 4m | 1 | -2.286 | 26.294 | -8.642  | -0.55 | -0.61 | -0.647 | 4.050 |
| HETATM 7016 | O | 4m | 1 | -3.425 | 27.963 | -7.726  | -0.59 | -0.20 | -0.647 | 4.050 |

END

### Compound 4n

|             |   |    |   |        |        |         |       |       |        |       |
|-------------|---|----|---|--------|--------|---------|-------|-------|--------|-------|
| HETATM 7000 | N | 4n | 1 | -4.117 | 26.712 | -12.254 | -0.55 | -0.10 | -0.201 | 4.260 |
| HETATM 7001 | N | 4n | 1 | -4.412 | 27.993 | -14.051 | -0.59 | +0.00 | -0.103 | 4.260 |
| HETATM 7002 | C | 4n | 1 | -3.781 | 26.917 | -13.542 | -0.28 | +0.04 | +0.214 | 4.260 |
| HETATM 7003 | C | 4n | 1 | -4.980 | 27.718 | -12.013 | -0.33 | +0.04 | +0.186 | 4.260 |
| HETATM 7004 | O | 4n | 1 | -5.141 | 28.460 | -13.082 | -0.90 | -0.03 | -0.195 | 4.260 |
| HETATM 7005 | C | 4n | 1 | -2.848 | 26.073 | -14.292 | -0.40 | +0.04 | +0.138 | 4.260 |
| HETATM 7006 | C | 4n | 1 | -1.976 | 26.496 | -15.274 | -0.56 | -0.00 | +0.030 | 4.260 |
| HETATM 7007 | C | 4n | 1 | -1.305 | 25.367 | -15.691 | -0.58 | +0.00 | +0.029 | 4.260 |
| HETATM 7008 | C | 4n | 1 | -1.805 | 24.322 | -14.941 | -0.54 | +0.05 | +0.123 | 4.260 |
| HETATM 7009 | O | 4n | 1 | -2.723 | 24.777 | -14.117 | -0.81 | -0.20 | -0.302 | 4.260 |
| HETATM 7010 | C | 4n | 1 | -5.665 | 27.952 | -10.703 | -0.47 | +0.01 | +0.085 | 4.260 |
| HETATM 7011 | C | 4n | 1 | -5.317 | 26.843 | -9.700  | -0.45 | +0.02 | +0.106 | 4.260 |
| HETATM 7012 | C | 4n | 1 | -4.156 | 27.197 | -8.806  | -0.26 | +0.06 | +0.186 | 4.260 |
| HETATM 7013 | O | 4n | 1 | -3.005 | 26.508 | -8.914  | -0.52 | -0.52 | -0.647 | 4.260 |
| HETATM 7014 | O | 4n | 1 | -4.244 | 28.100 | -7.986  | -0.47 | -0.12 | -0.647 | 4.260 |

END

### Compound 6g

|        |      |   |    |   |        |        |        |       |       |        |       |
|--------|------|---|----|---|--------|--------|--------|-------|-------|--------|-------|
| HETATM | 7000 | N | 6g | 0 | -0.397 | 30.615 | -5.569 | -0.95 | +0.01 | -0.105 | 7.841 |
| HETATM | 7001 | N | 6g | 0 | -1.979 | 31.766 | -6.614 | -0.24 | +0.10 | -0.203 | 7.841 |
| HETATM | 7002 | C | 6g | 0 | -0.757 | 31.825 | -6.039 | -0.35 | -0.11 | +0.191 | 7.841 |
| HETATM | 7003 | C | 6g | 0 | -2.326 | 30.475 | -6.463 | -0.28 | -0.03 | +0.185 | 7.841 |
| HETATM | 7004 | O | 6g | 0 | -1.380 | 29.813 | -5.845 | -0.95 | -0.03 | -0.195 | 7.841 |
| HETATM | 7005 | C | 6g | 0 | 0.050  | 33.088 | -5.959 | -0.45 | -0.03 | +0.038 | 7.841 |
| HETATM | 7006 | C | 6g | 0 | -0.488 | 34.423 | -5.994 | -0.39 | -0.00 | +0.003 | 7.841 |
| HETATM | 7007 | C | 6g | 0 | 0.411  | 35.529 | -5.909 | -0.44 | -0.00 | +0.000 | 7.841 |
| HETATM | 7008 | C | 6g | 0 | -1.874 | 34.708 | -6.107 | -0.38 | -0.00 | +0.000 | 7.841 |
| HETATM | 7009 | C | 6g | 0 | 1.788  | 35.318 | -5.795 | -0.56 | -0.00 | +0.000 | 7.841 |
| HETATM | 7010 | C | 6g | 0 | -0.077 | 36.847 | -5.939 | -0.37 | -0.00 | +0.000 | 7.841 |
| HETATM | 7011 | C | 6g | 0 | 2.299  | 34.030 | -5.762 | -0.71 | -0.00 | +0.000 | 7.841 |
| HETATM | 7012 | C | 6g | 0 | 1.449  | 32.933 | -5.842 | -0.61 | -0.00 | +0.003 | 7.841 |
| HETATM | 7013 | C | 6g | 0 | -1.441 | 37.090 | -6.052 | -0.39 | -0.00 | +0.000 | 7.841 |
| HETATM | 7014 | C | 6g | 0 | -2.334 | 36.027 | -6.135 | -0.41 | -0.00 | +0.000 | 7.841 |
| HETATM | 7015 | C | 6g | 0 | -3.622 | 29.896 | -6.946 | -0.35 | -0.00 | +0.074 | 7.841 |
| HETATM | 7016 | C | 6g | 0 | -4.035 | 28.657 | -6.142 | -0.36 | -0.00 | +0.020 | 7.841 |
| HETATM | 7017 | C | 6g | 0 | -3.169 | 27.447 | -6.516 | -0.45 | +0.01 | +0.098 | 7.841 |
| HETATM | 7018 | C | 6g | 0 | -3.274 | 27.084 | -7.973 | -0.31 | +0.06 | +0.185 | 7.841 |
| HETATM | 7019 | O | 6g | 0 | -4.212 | 27.504 | -8.631 | -0.33 | -0.19 | -0.647 | 7.841 |
| HETATM | 7020 | O | 6g | 0 | -2.348 | 26.301 | -8.563 | -0.58 | -0.54 | -0.647 | 7.841 |

END

### AeHKT enzyme (holoenzyme)

|      |   |    |     |   |   |         |        |         |      |       |   |
|------|---|----|-----|---|---|---------|--------|---------|------|-------|---|
| ATOM | 1 | N  | MET | C | 1 | -32.564 | 60.106 | -23.077 | 1.00 | 55.29 | N |
| ATOM | 2 | CA | MET | C | 1 | -32.594 | 58.609 | -23.093 | 1.00 | 53.81 | C |
| ATOM | 3 | C  | MET | C | 1 | -32.511 | 58.028 | -21.670 | 1.00 | 56.84 | C |
| ATOM | 4 | O  | MET | C | 1 | -32.737 | 56.837 | -21.484 | 1.00 | 62.02 | O |
| ATOM | 5 | CB | MET | C | 1 | -31.446 | 58.027 | -23.933 | 1.00 | 60.32 | C |
| ATOM | 6 | CG | MET | C | 1 | -31.526 | 58.305 | -25.440 | 1.00 | 57.40 | C |

|      |    |     |     |   |   |         |        |         |      |       |     |
|------|----|-----|-----|---|---|---------|--------|---------|------|-------|-----|
| ATOM | 7  | SD  | MET | C | 1 | -30.003 | 57.777 | -26.276 | 1.00 | 54.89 | S   |
| ATOM | 8  | CE  | MET | C | 1 | -29.933 | 58.896 | -27.675 | 1.00 | 54.09 | C   |
| ATOM | 9  | N   | LYS | C | 2 | -32.148 | 58.841 | -20.674 | 1.00 | 61.56 | N   |
| ATOM | 10 | CA  | LYS | C | 2 | -32.349 | 58.524 | -19.256 | 1.00 | 66.49 | C   |
| ATOM | 11 | C   | LYS | C | 2 | -31.664 | 57.200 | -18.873 | 1.00 | 60.62 | C   |
| ATOM | 12 | O   | LYS | C | 2 | -32.276 | 56.345 | -18.206 | 1.00 | 56.84 | O   |
| ATOM | 13 | CB  | LYS | C | 2 | -33.849 | 58.467 | -18.942 | 1.00 | 71.24 | C   |
| ATOM | 14 | CG  | LYS | C | 2 | -34.678 | 59.643 | -19.450 | 1.00 | 77.67 | C   |
| ATOM | 15 | CD  | LYS | C | 2 | -36.072 | 59.711 | -18.822 | 1.00 | 79.89 | C   |
| ATOM | 16 | CE  | LYS | C | 2 | -36.104 | 60.440 | -17.492 | 1.00 | 84.47 | C   |
| ATOM | 17 | NZ  | LYS | C | 2 | -35.935 | 61.901 | -17.673 | 1.00 | 86.70 | N1+ |
| ATOM | 18 | N   | PHE | C | 3 | -30.393 | 57.051 | -19.268 | 1.00 | 57.68 | N   |
| ATOM | 19 | CA  | PHE | C | 3 | -29.545 | 55.886 | -18.879 | 1.00 | 61.96 | C   |
| ATOM | 20 | C   | PHE | C | 3 | -29.073 | 55.997 | -17.422 | 1.00 | 54.23 | C   |
| ATOM | 21 | O   | PHE | C | 3 | -28.703 | 57.084 | -16.986 | 1.00 | 56.26 | O   |
| ATOM | 22 | CB  | PHE | C | 3 | -28.289 | 55.801 | -19.755 | 1.00 | 61.87 | C   |
| ATOM | 23 | CG  | PHE | C | 3 | -28.519 | 55.557 | -21.225 | 1.00 | 66.37 | C   |
| ATOM | 24 | CD1 | PHE | C | 3 | -29.257 | 54.465 | -21.663 | 1.00 | 68.23 | C   |
| ATOM | 25 | CD2 | PHE | C | 3 | -27.951 | 56.392 | -22.179 | 1.00 | 68.41 | C   |
| ATOM | 26 | CE1 | PHE | C | 3 | -29.457 | 54.234 | -23.017 | 1.00 | 67.52 | C   |
| ATOM | 27 | CE2 | PHE | C | 3 | -28.145 | 56.158 | -23.533 | 1.00 | 66.52 | C   |
| ATOM | 28 | CZ  | PHE | C | 3 | -28.895 | 55.078 | -23.949 | 1.00 | 68.80 | C   |
| ATOM | 29 | N   | THR | C | 4 | -29.065 | 54.864 | -16.704 | 1.00 | 52.63 | N   |
| ATOM | 30 | CA  | THR | C | 4 | -28.244 | 54.617 | -15.497 | 1.00 | 58.04 | C   |
| ATOM | 31 | C   | THR | C | 4 | -26.905 | 55.337 | -15.612 | 1.00 | 63.82 | C   |
| ATOM | 32 | O   | THR | C | 4 | -26.286 | 55.273 | -16.666 | 1.00 | 74.67 | O   |
| ATOM | 33 | CB  | THR | C | 4 | -27.928 | 53.123 | -15.369 | 1.00 | 64.02 | C   |
| ATOM | 34 | CG2 | THR | C | 4 | -26.983 | 52.744 | -14.245 | 1.00 | 70.13 | C   |
| ATOM | 35 | OG1 | THR | C | 4 | -29.182 | 52.489 | -15.152 | 1.00 | 65.81 | O   |
| ATOM | 36 | N   | PRO | C | 5 | -26.396 | 56.019 | -14.557 | 1.00 | 64.70 | N   |
| ATOM | 37 | CA  | PRO | C | 5 | -25.064 | 56.639 | -14.618 | 1.00 | 67.23 | C   |
| ATOM | 38 | C   | PRO | C | 5 | -23.943 | 55.596 | -14.733 | 1.00 | 60.62 | C   |
| ATOM | 39 | O   | PRO | C | 5 | -24.167 | 54.423 | -14.449 | 1.00 | 58.70 | O   |

|      |    |    |     |   |    |         |        |         |      |       |   |
|------|----|----|-----|---|----|---------|--------|---------|------|-------|---|
| ATOM | 40 | CB | PRO | C | 5  | -24.937 | 57.451 | -13.311 | 1.00 | 68.46 | C |
| ATOM | 41 | CG | PRO | C | 5  | -26.038 | 56.921 | -12.389 | 1.00 | 69.22 | C |
| ATOM | 42 | CD | PRO | C | 5  | -27.069 | 56.230 | -13.267 | 1.00 | 65.11 | C |
| ATOM | 43 | N  | PRO | C | 6  | -22.719 | 55.959 | -15.193 | 1.00 | 58.35 | N |
| ATOM | 44 | CA | PRO | C | 6  | -21.614 | 54.997 | -15.299 | 1.00 | 59.64 | C |
| ATOM | 45 | C  | PRO | C | 6  | -20.985 | 54.670 | -13.947 | 1.00 | 59.03 | C |
| ATOM | 46 | O  | PRO | C | 6  | -20.989 | 55.506 | -13.039 | 1.00 | 61.12 | O |
| ATOM | 47 | CB | PRO | C | 6  | -20.586 | 55.694 | -16.200 | 1.00 | 58.70 | C |
| ATOM | 48 | CG | PRO | C | 6  | -20.849 | 57.176 | -15.975 | 1.00 | 60.36 | C |
| ATOM | 49 | CD | PRO | C | 6  | -22.332 | 57.301 | -15.661 | 1.00 | 62.33 | C |
| ATOM | 50 | N  | PRO | C | 7  | -20.420 | 53.454 | -13.776 | 1.00 | 53.63 | N |
| ATOM | 51 | CA | PRO | C | 7  | -19.907 | 53.018 | -12.482 | 1.00 | 54.81 | C |
| ATOM | 52 | C  | PRO | C | 7  | -18.551 | 53.689 | -12.182 | 1.00 | 56.99 | C |
| ATOM | 53 | O  | PRO | C | 7  | -17.730 | 53.892 | -13.116 | 1.00 | 49.79 | O |
| ATOM | 54 | CB | PRO | C | 7  | -19.847 | 51.499 | -12.680 | 1.00 | 53.99 | C |
| ATOM | 55 | CG | PRO | C | 7  | -19.453 | 51.345 | -14.128 | 1.00 | 51.38 | C |
| ATOM | 56 | CD | PRO | C | 7  | -20.197 | 52.456 | -14.832 | 1.00 | 55.31 | C |
| ATOM | 57 | N  | SER | C | 8  | -18.342 | 54.077 | -10.909 | 1.00 | 54.25 | N |
| ATOM | 58 | CA | SER | C | 8  | -17.211 | 54.942 | -10.547 | 1.00 | 50.41 | C |
| ATOM | 59 | C  | SER | C | 8  | -15.897 | 54.155 | -10.665 | 1.00 | 47.26 | C |
| ATOM | 60 | O  | SER | C | 8  | -14.865 | 54.760 | -10.940 | 1.00 | 47.07 | O |
| ATOM | 61 | CB | SER | C | 8  | -17.389 | 55.607 | -9.212  | 1.00 | 43.35 | C |
| ATOM | 62 | OG | SER | C | 8  | -17.627 | 54.653 | -8.191  | 1.00 | 45.20 | O |
| ATOM | 63 | N  | SER | C | 9  | -15.988 | 52.815 | -10.594 | 1.00 | 49.44 | N |
| ATOM | 64 | CA | SER | C | 9  | -14.870 | 51.839 | -10.811 | 1.00 | 49.01 | C |
| ATOM | 65 | C  | SER | C | 9  | -14.125 | 51.984 | -12.157 | 1.00 | 50.24 | C |
| ATOM | 66 | O  | SER | C | 9  | -13.061 | 51.406 | -12.297 | 1.00 | 56.11 | O |
| ATOM | 67 | CB | SER | C | 9  | -15.397 | 50.452 | -10.696 | 1.00 | 52.16 | C |
| ATOM | 68 | OG | SER | C | 9  | -16.212 | 50.162 | -11.823 | 1.00 | 59.59 | O |
| ATOM | 69 | N  | LEU | C | 10 | -14.659 | 52.729 | -13.141 | 1.00 | 51.84 | N |
| ATOM | 70 | CA | LEU | C | 10 | -13.982 | 52.947 | -14.442 | 1.00 | 49.76 | C |
| ATOM | 71 | C  | LEU | C | 10 | -13.296 | 54.334 | -14.533 | 1.00 | 53.27 | C |
| ATOM | 72 | O  | LEU | C | 10 | -12.774 | 54.709 | -15.605 | 1.00 | 56.09 | O |



|      |     |     |     |   |    |         |        |         |      |        |     |
|------|-----|-----|-----|---|----|---------|--------|---------|------|--------|-----|
| ATOM | 73  | CB  | LEU | C | 10 | -14.999 | 52.739 | -15.581 | 1.00 | 48.20  | C   |
| ATOM | 74  | CG  | LEU | C | 10 | -15.500 | 51.301 | -15.800 | 1.00 | 52.25  | C   |
| ATOM | 75  | CD1 | LEU | C | 10 | -16.497 | 51.230 | -16.937 | 1.00 | 52.89  | C   |
| ATOM | 76  | CD2 | LEU | C | 10 | -14.367 | 50.333 | -16.103 | 1.00 | 53.41  | C   |
| ATOM | 77  | N   | ARG | C | 11 | -13.212 | 55.089 | -13.432 | 1.00 | 52.19  | N   |
| ATOM | 78  | CA  | ARG | C | 11 | -12.669 | 56.464 | -13.499 | 1.00 | 50.52  | C   |
| ATOM | 79  | C   | ARG | C | 11 | -11.129 | 56.461 | -13.452 | 1.00 | 45.50  | C   |
| ATOM | 80  | O   | ARG | C | 11 | -10.517 | 57.347 | -14.012 | 1.00 | 44.47  | O   |
| ATOM | 81  | CB  | ARG | C | 11 | -13.262 | 57.358 | -12.404 | 1.00 | 57.95  | C   |
| ATOM | 82  | CG  | ARG | C | 11 | -13.353 | 58.831 | -12.798 | 1.00 | 75.17  | C   |
| ATOM | 83  | CD  | ARG | C | 11 | -14.602 | 59.565 | -12.319 | 1.00 | 87.78  | C   |
| ATOM | 84  | NE  | ARG | C | 11 | -15.019 | 59.234 | -10.952 | 1.00 | 105.27 | N   |
| ATOM | 85  | CZ  | ARG | C | 11 | -16.145 | 59.667 | -10.374 | 1.00 | 120.80 | C   |
| ATOM | 86  | NH1 | ARG | C | 11 | -16.500 | 59.221 | -9.179  | 1.00 | 116.80 | N1+ |
| ATOM | 87  | NH2 | ARG | C | 11 | -16.918 | 60.547 | -10.993 | 1.00 | 120.77 | N   |
| ATOM | 88  | N   | GLY | C | 12 | -10.505 | 55.461 | -12.818 | 1.00 | 45.56  | N   |
| ATOM | 89  | CA  | GLY | C | 12 | -9.054  | 55.402 | -12.703 | 1.00 | 45.84  | C   |
| ATOM | 90  | C   | GLY | C | 12 | -8.382  | 54.640 | -13.849 | 1.00 | 50.26  | C   |
| ATOM | 91  | O   | GLY | C | 12 | -9.022  | 53.923 | -14.618 | 1.00 | 46.19  | O   |
| ATOM | 92  | N   | PRO | C | 13 | -7.039  | 54.733 | -13.971 | 1.00 | 52.85  | N   |
| ATOM | 93  | CA  | PRO | C | 13 | -6.316  | 54.078 | -15.063 | 1.00 | 49.69  | C   |
| ATOM | 94  | C   | PRO | C | 13 | -6.083  | 52.581 | -14.804 | 1.00 | 49.18  | C   |
| ATOM | 95  | O   | PRO | C | 13 | -6.167  | 52.136 | -13.656 | 1.00 | 45.61  | O   |
| ATOM | 96  | CB  | PRO | C | 13 | -4.983  | 54.854 | -15.088 | 1.00 | 46.60  | C   |
| ATOM | 97  | CG  | PRO | C | 13 | -4.746  | 55.231 | -13.623 | 1.00 | 47.99  | C   |
| ATOM | 98  | CD  | PRO | C | 13 | -6.132  | 55.434 | -13.041 | 1.00 | 51.59  | C   |
| ATOM | 99  | N   | LEU | C | 14 | -5.780  | 51.841 | -15.883 | 1.00 | 46.45  | N   |
| ATOM | 100 | CA  | LEU | C | 14 | -5.329  | 50.453 | -15.832 | 1.00 | 41.91  | C   |
| ATOM | 101 | C   | LEU | C | 14 | -3.864  | 50.398 | -15.398 | 1.00 | 42.38  | C   |
| ATOM | 102 | O   | LEU | C | 14 | -3.005  | 51.046 | -16.001 | 1.00 | 41.41  | O   |
| ATOM | 103 | CB  | LEU | C | 14 | -5.483  | 49.843 | -17.226 | 1.00 | 43.44  | C   |
| ATOM | 104 | CG  | LEU | C | 14 | -5.017  | 48.395 | -17.389 | 1.00 | 42.43  | C   |
| ATOM | 105 | CD1 | LEU | C | 14 | -5.997  | 47.415 | -16.768 | 1.00 | 42.25  | C   |

|      |     |     |     |   |    |        |        |         |      |       |     |
|------|-----|-----|-----|---|----|--------|--------|---------|------|-------|-----|
| ATOM | 106 | CD2 | LEU | C | 14 | -4.819 | 48.075 | -18.856 | 1.00 | 45.59 | C   |
| ATOM | 107 | N   | VAL | C | 15 | -3.586 | 49.590 | -14.371 | 1.00 | 44.37 | N   |
| ATOM | 108 | CA  | VAL | C | 15 | -2.249 | 49.431 | -13.846 | 1.00 | 38.66 | C   |
| ATOM | 109 | C   | VAL | C | 15 | -2.022 | 47.937 | -13.654 | 1.00 | 38.30 | C   |
| ATOM | 110 | O   | VAL | C | 15 | -2.600 | 47.348 | -12.716 | 1.00 | 37.10 | O   |
| ATOM | 111 | CB  | VAL | C | 15 | -2.043 | 50.186 | -12.515 | 1.00 | 40.33 | C   |
| ATOM | 112 | CG1 | VAL | C | 15 | -0.573 | 50.204 | -12.118 | 1.00 | 40.23 | C   |
| ATOM | 113 | CG2 | VAL | C | 15 | -2.566 | 51.615 | -12.571 | 1.00 | 41.55 | C   |
| ATOM | 114 | N   | ILE | C | 16 | -1.194 | 47.366 | -14.545 | 1.00 | 35.94 | N   |
| ATOM | 115 | CA  | ILE | C | 16 | -0.821 | 45.947 | -14.546 | 1.00 | 39.55 | C   |
| ATOM | 116 | C   | ILE | C | 16 | 0.687  | 45.842 | -14.365 | 1.00 | 38.03 | C   |
| ATOM | 117 | O   | ILE | C | 16 | 1.424  | 46.143 | -15.293 | 1.00 | 39.52 | O   |
| ATOM | 118 | CB  | ILE | C | 16 | -1.265 | 45.244 | -15.849 | 1.00 | 41.87 | C   |
| ATOM | 119 | CG1 | ILE | C | 16 | -2.760 | 45.428 | -16.129 | 1.00 | 41.76 | C   |
| ATOM | 120 | CG2 | ILE | C | 16 | -0.880 | 43.771 | -15.830 | 1.00 | 39.43 | C   |
| ATOM | 121 | CD1 | ILE | C | 16 | -3.657 | 44.847 | -15.053 | 1.00 | 41.79 | C   |
| ATOM | 122 | N   | PRO | C | 17 | 1.191  | 45.452 | -13.175 | 1.00 | 38.50 | N   |
| ATOM | 123 | CA  | PRO | C | 17 | 2.636  | 45.392 | -12.939 | 1.00 | 39.59 | C   |
| ATOM | 124 | C   | PRO | C | 17 | 3.323  | 44.209 | -13.625 | 1.00 | 40.46 | C   |
| ATOM | 125 | O   | PRO | C | 17 | 2.679  | 43.189 | -13.876 | 1.00 | 40.10 | O   |
| ATOM | 126 | CB  | PRO | C | 17 | 2.786  | 45.213 | -11.419 | 1.00 | 38.62 | C   |
| ATOM | 127 | CG  | PRO | C | 17 | 1.444  | 44.681 | -10.951 | 1.00 | 39.88 | C   |
| ATOM | 128 | CD  | PRO | C | 17 | 0.409  | 45.144 | -11.967 | 1.00 | 39.08 | C   |
| ATOM | 129 | N   | ASP | C | 18 | 4.626  | 44.362 | -13.878 | 1.00 | 39.64 | N   |
| ATOM | 130 | CA  | ASP | C | 18 | 5.437  | 43.283 | -14.385 | 1.00 | 43.07 | C   |
| ATOM | 131 | C   | ASP | C | 18 | 5.544  | 42.231 | -13.278 | 1.00 | 43.65 | C   |
| ATOM | 132 | O   | ASP | C | 18 | 5.607  | 42.579 | -12.101 | 1.00 | 41.08 | O   |
| ATOM | 133 | CB  | ASP | C | 18 | 6.816  | 43.766 | -14.855 | 1.00 | 47.28 | C   |
| ATOM | 134 | CG  | ASP | C | 18 | 6.822  | 44.562 | -16.153 | 1.00 | 46.76 | C   |
| ATOM | 135 | OD1 | ASP | C | 18 | 5.877  | 44.424 | -16.952 | 1.00 | 48.51 | O   |
| ATOM | 136 | OD2 | ASP | C | 18 | 7.767  | 45.320 | -16.351 | 1.00 | 55.43 | O1- |
| ATOM | 137 | N   | LYS | C | 19 | 5.517  | 40.953 | -13.685 | 1.00 | 43.86 | N   |
| ATOM | 138 | CA  | LYS | C | 19 | 5.708  | 39.813 | -12.787 | 1.00 | 41.53 | C   |

|      |     |     |     |   |    |        |        |         |      |       |     |
|------|-----|-----|-----|---|----|--------|--------|---------|------|-------|-----|
| ATOM | 139 | C   | LYS | C | 19 | 6.573  | 38.749 | -13.471 | 1.00 | 42.37 | C   |
| ATOM | 140 | O   | LYS | C | 19 | 6.594  | 38.621 | -14.688 | 1.00 | 39.39 | O   |
| ATOM | 141 | CB  | LYS | C | 19 | 4.375  | 39.192 | -12.377 | 1.00 | 39.19 | C   |
| ATOM | 142 | CG  | LYS | C | 19 | 3.389  | 40.146 | -11.715 | 1.00 | 40.50 | C   |
| ATOM | 143 | CD  | LYS | C | 19 | 2.061  | 39.475 | -11.353 | 1.00 | 40.20 | C   |
| ATOM | 144 | CE  | LYS | C | 19 | 1.054  | 40.436 | -10.756 | 1.00 | 40.80 | C   |
| ATOM | 145 | NZ  | LYS | C | 19 | 1.602  | 41.127 | -9.566  | 1.00 | 42.39 | N1+ |
| ATOM | 146 | N   | ILE | C | 20 | 7.284  | 37.984 | -12.643 | 1.00 | 42.81 | N   |
| ATOM | 147 | CA  | ILE | C | 20 | 8.045  | 36.851 | -13.095 | 1.00 | 39.23 | C   |
| ATOM | 148 | C   | ILE | C | 20 | 7.130  | 35.642 | -12.960 | 1.00 | 40.76 | C   |
| ATOM | 149 | O   | ILE | C | 20 | 6.925  | 35.140 | -11.865 | 1.00 | 44.40 | O   |
| ATOM | 150 | CB  | ILE | C | 20 | 9.366  | 36.705 | -12.310 | 1.00 | 39.89 | C   |
| ATOM | 151 | CG1 | ILE | C | 20 | 10.124 | 38.041 | -12.291 | 1.00 | 39.07 | C   |
| ATOM | 152 | CG2 | ILE | C | 20 | 10.213 | 35.565 | -12.870 | 1.00 | 36.24 | C   |
| ATOM | 153 | CD1 | ILE | C | 20 | 11.550 | 37.941 | -11.832 | 1.00 | 41.70 | C   |
| ATOM | 154 | N   | MET | C | 21 | 6.568  | 35.220 | -14.099 | 1.00 | 40.91 | N   |
| ATOM | 155 | CA  | MET | C | 21 | 5.543  | 34.192 | -14.156 | 1.00 | 38.68 | C   |
| ATOM | 156 | C   | MET | C | 21 | 6.186  | 32.801 | -14.282 | 1.00 | 37.58 | C   |
| ATOM | 157 | O   | MET | C | 21 | 6.498  | 32.332 | -15.384 | 1.00 | 37.42 | O   |
| ATOM | 158 | CB  | MET | C | 21 | 4.616  | 34.476 | -15.339 | 1.00 | 38.41 | C   |
| ATOM | 159 | CG  | MET | C | 21 | 3.901  | 35.786 | -15.213 | 1.00 | 38.71 | C   |
| ATOM | 160 | SD  | MET | C | 21 | 2.818  | 35.838 | -13.762 | 1.00 | 42.19 | S   |
| ATOM | 161 | CE  | MET | C | 21 | 1.426  | 34.870 | -14.357 | 1.00 | 39.55 | C   |
| ATOM | 162 | N   | MET | C | 22 | 6.404  | 32.157 | -13.125 | 1.00 | 37.58 | N   |
| ATOM | 163 | CA  | MET | C | 22 | 7.129  | 30.873 | -13.028 | 1.00 | 34.69 | C   |
| ATOM | 164 | C   | MET | C | 22 | 6.266  | 29.859 | -12.265 | 1.00 | 37.30 | C   |
| ATOM | 165 | O   | MET | C | 22 | 6.765  | 28.989 | -11.530 | 1.00 | 38.97 | O   |
| ATOM | 166 | CB  | MET | C | 22 | 8.491  | 31.070 | -12.364 | 1.00 | 33.99 | C   |
| ATOM | 167 | CG  | MET | C | 22 | 9.427  | 31.919 | -13.229 | 1.00 | 35.83 | C   |
| ATOM | 168 | SD  | MET | C | 22 | 11.183 | 31.930 | -12.731 | 1.00 | 33.69 | S   |
| ATOM | 169 | CE  | MET | C | 22 | 11.649 | 30.245 | -13.120 | 1.00 | 34.87 | C   |
| ATOM | 170 | N   | GLY | C | 23 | 4.949  | 30.008 | -12.453 | 1.00 | 36.62 | N   |
| ATOM | 171 | CA  | GLY | C | 23 | 3.985  | 28.976 | -12.274 | 1.00 | 38.28 | C   |

|      |     |     |     |   |    |        |        |         |      |       |   |
|------|-----|-----|-----|---|----|--------|--------|---------|------|-------|---|
| ATOM | 172 | C   | GLY | C | 23 | 3.880  | 28.147 | -13.548 | 1.00 | 41.29 | C |
| ATOM | 173 | O   | GLY | C | 23 | 4.687  | 28.290 | -14.466 | 1.00 | 45.23 | O |
| ATOM | 174 | N   | PRO | C | 24 | 2.891  | 27.243 | -13.638 | 1.00 | 42.98 | N |
| ATOM | 175 | CA  | PRO | C | 24 | 2.698  | 26.441 | -14.846 | 1.00 | 42.38 | C |
| ATOM | 176 | C   | PRO | C | 24 | 1.822  | 27.113 | -15.913 | 1.00 | 42.35 | C |
| ATOM | 177 | O   | PRO | C | 24 | 1.347  | 26.429 | -16.812 | 1.00 | 38.47 | O |
| ATOM | 178 | CB  | PRO | C | 24 | 2.054  | 25.160 | -14.279 | 1.00 | 43.16 | C |
| ATOM | 179 | CG  | PRO | C | 24 | 1.265  | 25.639 | -13.075 | 1.00 | 45.68 | C |
| ATOM | 180 | CD  | PRO | C | 24 | 1.976  | 26.875 | -12.547 | 1.00 | 43.90 | C |
| ATOM | 181 | N   | GLY | C | 25 | 1.648  | 28.444 | -15.821 | 1.00 | 41.97 | N |
| ATOM | 182 | CA  | GLY | C | 25 | 0.977  | 29.205 | -16.867 | 1.00 | 39.99 | C |
| ATOM | 183 | C   | GLY | C | 25 | 0.053  | 30.274 | -16.302 | 1.00 | 36.34 | C |
| ATOM | 184 | O   | GLY | C | 25 | -0.533 | 30.073 | -15.259 | 1.00 | 34.83 | O |
| ATOM | 185 | N   | PRO | C | 26 | -0.083 | 31.421 | -16.978 | 1.00 | 41.90 | N |
| ATOM | 186 | CA  | PRO | C | 26 | 0.670  | 31.843 | -18.150 | 1.00 | 39.36 | C |
| ATOM | 187 | C   | PRO | C | 26 | 2.167  | 32.053 | -17.907 | 1.00 | 37.09 | C |
| ATOM | 188 | O   | PRO | C | 26 | 2.573  | 32.376 | -16.823 | 1.00 | 41.30 | O |
| ATOM | 189 | CB  | PRO | C | 26 | 0.047  | 33.204 | -18.505 | 1.00 | 44.10 | C |
| ATOM | 190 | CG  | PRO | C | 26 | -1.395 | 33.058 | -18.085 | 1.00 | 43.59 | C |
| ATOM | 191 | CD  | PRO | C | 26 | -1.323 | 32.212 | -16.836 | 1.00 | 45.81 | C |
| ATOM | 192 | N   | SER | C | 27 | 2.979  | 31.853 | -18.936 | 1.00 | 38.91 | N |
| ATOM | 193 | CA  | SER | C | 27 | 4.407  | 32.217 | -18.879 | 1.00 | 38.84 | C |
| ATOM | 194 | C   | SER | C | 27 | 4.617  | 33.704 | -19.229 | 1.00 | 36.47 | C |
| ATOM | 195 | O   | SER | C | 27 | 3.687  | 34.403 | -19.665 | 1.00 | 39.86 | O |
| ATOM | 196 | CB  | SER | C | 27 | 5.169  | 31.330 | -19.810 | 1.00 | 34.92 | C |
| ATOM | 197 | OG  | SER | C | 27 | 4.493  | 31.271 | -21.043 | 1.00 | 32.77 | O |
| ATOM | 198 | N   | ASN | C | 28 | 5.845  | 34.181 | -19.039 | 1.00 | 32.73 | N |
| ATOM | 199 | CA  | ASN | C | 28 | 6.261  | 35.476 | -19.535 | 1.00 | 35.52 | C |
| ATOM | 200 | C   | ASN | C | 28 | 6.480  | 35.421 | -21.059 | 1.00 | 38.22 | C |
| ATOM | 201 | O   | ASN | C | 28 | 7.215  | 34.532 | -21.595 | 1.00 | 36.90 | O |
| ATOM | 202 | CB  | ASN | C | 28 | 7.572  | 35.937 | -18.892 | 1.00 | 39.47 | C |
| ATOM | 203 | CG  | ASN | C | 28 | 7.467  | 36.305 | -17.428 | 1.00 | 38.13 | C |
| ATOM | 204 | ND2 | ASN | C | 28 | 6.735  | 37.366 | -17.119 | 1.00 | 34.20 | N |

|      |     |     |     |   |    |        |        |         |      |       |     |
|------|-----|-----|-----|---|----|--------|--------|---------|------|-------|-----|
| ATOM | 205 | OD1 | ASN | C | 28 | 8.064  | 35.632 | -16.589 | 1.00 | 40.15 | O   |
| ATOM | 206 | N   | CYS | C | 29 | 5.910  | 36.409 | -21.759 | 1.00 | 37.59 | N   |
| ATOM | 207 | CA  | CYS | C | 29 | 6.092  | 36.554 | -23.215 | 1.00 | 38.92 | C   |
| ATOM | 208 | C   | CYS | C | 29 | 7.294  | 37.465 | -23.491 | 1.00 | 38.43 | C   |
| ATOM | 209 | O   | CYS | C | 29 | 7.535  | 38.403 | -22.747 | 1.00 | 39.67 | O   |
| ATOM | 210 | CB  | CYS | C | 29 | 4.850  | 37.147 | -23.871 | 1.00 | 36.01 | C   |
| ATOM | 211 | SG  | CYS | C | 29 | 3.355  | 36.171 | -23.589 | 1.00 | 36.75 | S   |
| ATOM | 212 | N   | SER | C | 30 | 8.011  | 37.200 | -24.580 | 1.00 | 38.14 | N   |
| ATOM | 213 | CA  | SER | C | 30 | 9.102  | 38.062 | -25.023 | 1.00 | 40.83 | C   |
| ATOM | 214 | C   | SER | C | 30 | 8.535  | 39.401 | -25.476 | 1.00 | 40.68 | C   |
| ATOM | 215 | O   | SER | C | 30 | 7.349  | 39.510 | -25.753 | 1.00 | 43.57 | O   |
| ATOM | 216 | CB  | SER | C | 30 | 9.883  | 37.439 | -26.143 | 1.00 | 39.81 | C   |
| ATOM | 217 | OG  | SER | C | 30 | 9.127  | 37.529 | -27.329 | 1.00 | 41.48 | O   |
| ATOM | 218 | N   | LYS | C | 31 | 9.416  | 40.398 | -25.545 | 1.00 | 46.00 | N   |
| ATOM | 219 | CA  | LYS | C | 31 | 9.112  | 41.760 | -26.046 | 1.00 | 48.30 | C   |
| ATOM | 220 | C   | LYS | C | 31 | 8.487  | 41.710 | -27.444 | 1.00 | 42.56 | C   |
| ATOM | 221 | O   | LYS | C | 31 | 7.447  | 42.318 | -27.688 | 1.00 | 36.88 | O   |
| ATOM | 222 | CB  | LYS | C | 31 | 10.400 | 42.584 | -26.136 | 1.00 | 53.07 | C   |
| ATOM | 223 | CG  | LYS | C | 31 | 10.497 | 43.750 | -25.162 | 1.00 | 59.01 | C   |
| ATOM | 224 | CD  | LYS | C | 31 | 10.030 | 43.489 | -23.749 | 1.00 | 53.69 | C   |
| ATOM | 225 | CE  | LYS | C | 31 | 10.659 | 44.463 | -22.768 | 1.00 | 60.31 | C   |
| ATOM | 226 | NZ  | LYS | C | 31 | 9.675  | 45.428 | -22.219 | 1.00 | 65.62 | N1+ |
| ATOM | 227 | N   | ARG | C | 32 | 9.167  | 40.988 | -28.340 | 1.00 | 40.97 | N   |
| ATOM | 228 | CA  | ARG | C | 32 | 8.731  | 40.719 | -29.719 | 1.00 | 40.37 | C   |
| ATOM | 229 | C   | ARG | C | 32 | 7.278  | 40.189 | -29.764 | 1.00 | 40.26 | C   |
| ATOM | 230 | O   | ARG | C | 32 | 6.460  | 40.651 | -30.584 | 1.00 | 41.75 | O   |
| ATOM | 231 | CB  | ARG | C | 32 | 9.723  | 39.732 | -30.335 | 1.00 | 37.17 | C   |
| ATOM | 232 | CG  | ARG | C | 32 | 9.524  | 39.484 | -31.814 | 1.00 | 37.06 | C   |
| ATOM | 233 | CD  | ARG | C | 32 | 10.397 | 38.354 | -32.312 | 1.00 | 36.51 | C   |
| ATOM | 234 | NE  | ARG | C | 32 | 9.966  | 37.972 | -33.648 | 1.00 | 40.30 | N   |
| ATOM | 235 | CZ  | ARG | C | 32 | 10.669 | 37.214 | -34.490 | 1.00 | 42.15 | C   |
| ATOM | 236 | NH1 | ARG | C | 32 | 11.874 | 36.776 | -34.160 | 1.00 | 42.55 | N1+ |
| ATOM | 237 | NH2 | ARG | C | 32 | 10.146 | 36.890 | -35.657 | 1.00 | 39.20 | N   |

|      |     |     |     |   |    |        |        |         |      |       |   |
|------|-----|-----|-----|---|----|--------|--------|---------|------|-------|---|
| ATOM | 238 | N   | VAL | C | 33 | 6.938  | 39.245 | -28.874 | 1.00 | 35.28 | N |
| ATOM | 239 | CA  | VAL | C | 33 | 5.621  | 38.570 | -28.901 | 1.00 | 34.06 | C |
| ATOM | 240 | C   | VAL | C | 33 | 4.508  | 39.514 | -28.409 | 1.00 | 34.19 | C |
| ATOM | 241 | O   | VAL | C | 33 | 3.475  | 39.635 | -29.069 | 1.00 | 31.34 | O |
| ATOM | 242 | CB  | VAL | C | 33 | 5.678  | 37.259 | -28.105 | 1.00 | 33.82 | C |
| ATOM | 243 | CG1 | VAL | C | 33 | 4.299  | 36.735 | -27.747 | 1.00 | 32.50 | C |
| ATOM | 244 | CG2 | VAL | C | 33 | 6.500  | 36.220 | -28.855 | 1.00 | 38.07 | C |
| ATOM | 245 | N   | LEU | C | 34 | 4.714  | 40.203 | -27.278 | 1.00 | 35.52 | N |
| ATOM | 246 | CA  | LEU | C | 34 | 3.744  | 41.227 | -26.839 | 1.00 | 37.11 | C |
| ATOM | 247 | C   | LEU | C | 34 | 3.616  | 42.345 | -27.875 | 1.00 | 37.71 | C |
| ATOM | 248 | O   | LEU | C | 34 | 2.500  | 42.783 | -28.117 | 1.00 | 44.38 | O |
| ATOM | 249 | CB  | LEU | C | 34 | 4.135  | 41.822 | -25.488 | 1.00 | 36.44 | C |
| ATOM | 250 | CG  | LEU | C | 34 | 4.175  | 40.814 | -24.355 | 1.00 | 42.11 | C |
| ATOM | 251 | CD1 | LEU | C | 34 | 4.660  | 41.467 | -23.078 | 1.00 | 41.07 | C |
| ATOM | 252 | CD2 | LEU | C | 34 | 2.808  | 40.167 | -24.159 | 1.00 | 43.04 | C |
| ATOM | 253 | N   | ALA | C | 35 | 4.726  | 42.813 | -28.463 | 1.00 | 35.54 | N |
| ATOM | 254 | CA  | ALA | C | 35 | 4.661  | 43.917 | -29.469 | 1.00 | 36.88 | C |
| ATOM | 255 | C   | ALA | C | 35 | 3.745  | 43.538 | -30.643 | 1.00 | 35.74 | C |
| ATOM | 256 | O   | ALA | C | 35 | 3.079  | 44.378 | -31.188 | 1.00 | 41.40 | O |
| ATOM | 257 | CB  | ALA | C | 35 | 6.041  | 44.303 | -29.967 | 1.00 | 33.14 | C |
| ATOM | 258 | N   | ALA | C | 36 | 3.729  | 42.263 | -31.018 | 1.00 | 39.78 | N |
| ATOM | 259 | CA  | ALA | C | 36 | 2.899  | 41.726 | -32.122 | 1.00 | 44.43 | C |
| ATOM | 260 | C   | ALA | C | 36 | 1.391  | 41.984 | -31.930 | 1.00 | 46.79 | C |
| ATOM | 261 | O   | ALA | C | 36 | 0.664  | 42.040 | -32.928 | 1.00 | 49.46 | O |
| ATOM | 262 | CB  | ALA | C | 36 | 3.166  | 40.247 | -32.262 | 1.00 | 44.36 | C |
| ATOM | 263 | N   | LEU | C | 37 | 0.927  | 42.124 | -30.677 | 1.00 | 43.05 | N |
| ATOM | 264 | CA  | LEU | C | 37 | -0.476 | 42.382 | -30.348 | 1.00 | 41.17 | C |
| ATOM | 265 | C   | LEU | C | 37 | -0.932 | 43.749 | -30.873 | 1.00 | 45.14 | C |
| ATOM | 266 | O   | LEU | C | 37 | -2.126 | 43.933 | -31.233 | 1.00 | 49.55 | O |
| ATOM | 267 | CB  | LEU | C | 37 | -0.641 | 42.330 | -28.827 | 1.00 | 41.07 | C |
| ATOM | 268 | CG  | LEU | C | 37 | -0.460 | 40.958 | -28.172 | 1.00 | 45.77 | C |
| ATOM | 269 | CD1 | LEU | C | 37 | -0.501 | 41.066 | -26.656 | 1.00 | 48.46 | C |
| ATOM | 270 | CD2 | LEU | C | 37 | -1.528 | 39.977 | -28.638 | 1.00 | 44.90 | C |

|      |     |     |     |   |    |        |        |         |      |       |   |
|------|-----|-----|-----|---|----|--------|--------|---------|------|-------|---|
| ATOM | 271 | N   | ASN | C | 38 | -0.007 | 44.719 | -30.858 | 1.00 | 45.51 | N |
| ATOM | 272 | CA  | ASN | C | 38 | -0.291 | 46.139 | -31.130 | 1.00 | 44.44 | C |
| ATOM | 273 | C   | ASN | C | 38 | -0.127 | 46.398 | -32.632 | 1.00 | 43.95 | C |
| ATOM | 274 | O   | ASN | C | 38 | 0.926  | 46.839 | -33.088 | 1.00 | 38.80 | O |
| ATOM | 275 | CB  | ASN | C | 38 | 0.608  | 47.039 | -30.284 | 1.00 | 48.47 | C |
| ATOM | 276 | CG  | ASN | C | 38 | 0.517  | 48.505 | -30.659 | 1.00 | 49.10 | C |
| ATOM | 277 | ND2 | ASN | C | 38 | 1.639  | 49.202 | -30.560 | 1.00 | 48.58 | N |
| ATOM | 278 | OD1 | ASN | C | 38 | -0.540 | 49.002 | -31.039 | 1.00 | 46.00 | O |
| ATOM | 279 | N   | ASN | C | 39 | -1.183 | 46.046 | -33.375 | 1.00 | 42.43 | N |
| ATOM | 280 | CA  | ASN | C | 39 | -1.229 | 45.969 | -34.828 | 1.00 | 39.07 | C |
| ATOM | 281 | C   | ASN | C | 39 | -2.710 | 46.015 | -35.220 | 1.00 | 38.51 | C |
| ATOM | 282 | O   | ASN | C | 39 | -3.568 | 45.722 | -34.412 | 1.00 | 39.38 | O |
| ATOM | 283 | CB  | ASN | C | 39 | -0.535 | 44.715 | -35.373 | 1.00 | 37.04 | C |
| ATOM | 284 | CG  | ASN | C | 39 | 0.978  | 44.845 | -35.450 | 1.00 | 44.04 | C |
| ATOM | 285 | ND2 | ASN | C | 39 | 1.684  | 43.950 | -34.762 | 1.00 | 40.59 | N |
| ATOM | 286 | OD1 | ASN | C | 39 | 1.510  | 45.712 | -36.168 | 1.00 | 40.64 | O |
| ATOM | 287 | N   | THR | C | 40 | -2.996 | 46.426 | -36.450 | 1.00 | 38.84 | N |
| ATOM | 288 | CA  | THR | C | 40 | -4.349 | 46.567 | -36.942 | 1.00 | 39.31 | C |
| ATOM | 289 | C   | THR | C | 40 | -5.079 | 45.226 | -36.826 | 1.00 | 36.47 | C |
| ATOM | 290 | O   | THR | C | 40 | -4.514 | 44.191 | -37.240 | 1.00 | 31.30 | O |
| ATOM | 291 | CB  | THR | C | 40 | -4.319 | 47.022 | -38.407 | 1.00 | 46.03 | C |
| ATOM | 292 | CG2 | THR | C | 40 | -5.670 | 47.502 | -38.885 | 1.00 | 49.92 | C |
| ATOM | 293 | OG1 | THR | C | 40 | -3.351 | 48.066 | -38.530 | 1.00 | 53.96 | O |
| ATOM | 294 | N   | CYS | C | 41 | -6.291 | 45.254 | -36.252 | 1.00 | 33.68 | N |
| ATOM | 295 | CA  | CYS | C | 41 | -7.175 | 44.117 | -36.213 | 1.00 | 36.52 | C |
| ATOM | 296 | C   | CYS | C | 41 | -7.657 | 43.890 | -37.655 | 1.00 | 39.37 | C |
| ATOM | 297 | O   | CYS | C | 41 | -8.608 | 44.521 | -38.095 | 1.00 | 40.96 | O |
| ATOM | 298 | CB  | CYS | C | 41 | -8.362 | 44.320 | -35.262 | 1.00 | 38.77 | C |
| ATOM | 299 | SG  | CYS | C | 41 | -7.971 | 44.728 | -33.529 | 1.00 | 42.04 | S |
| ATOM | 300 | N   | LEU | C | 42 | -6.975 | 43.010 | -38.400 | 1.00 | 41.10 | N |
| ATOM | 301 | CA  | LEU | C | 42 | -7.262 | 42.788 | -39.826 | 1.00 | 45.05 | C |
| ATOM | 302 | C   | LEU | C | 42 | -8.606 | 42.084 | -40.031 | 1.00 | 48.26 | C |
| ATOM | 303 | O   | LEU | C | 42 | -9.074 | 41.346 | -39.172 | 1.00 | 49.86 | O |

|      |     |     |     |   |    |         |        |         |      |       |   |
|------|-----|-----|-----|---|----|---------|--------|---------|------|-------|---|
| ATOM | 304 | CB  | LEU | C | 42 | -6.186  | 41.909 | -40.450 | 1.00 | 44.68 | C |
| ATOM | 305 | CG  | LEU | C | 42 | -4.786  | 42.490 | -40.486 | 1.00 | 46.52 | C |
| ATOM | 306 | CD1 | LEU | C | 42 | -3.813  | 41.455 | -41.028 | 1.00 | 46.98 | C |
| ATOM | 307 | CD2 | LEU | C | 42 | -4.751  | 43.759 | -41.312 | 1.00 | 48.65 | C |
| ATOM | 308 | N   | SER | C | 43 | -9.164  | 42.284 | -41.230 | 1.00 | 50.70 | N |
| ATOM | 309 | CA  | SER | C | 43 | -10.397 | 41.644 | -41.677 | 1.00 | 50.44 | C |
| ATOM | 310 | C   | SER | C | 43 | -10.117 | 40.165 | -41.915 | 1.00 | 45.12 | C |
| ATOM | 311 | O   | SER | C | 43 | -8.974  | 39.813 | -42.167 | 1.00 | 43.22 | O |
| ATOM | 312 | CB  | SER | C | 43 | -10.935 | 42.265 | -42.920 | 1.00 | 49.62 | C |
| ATOM | 313 | OG  | SER | C | 43 | -12.102 | 41.587 | -43.342 | 1.00 | 52.74 | O |
| ATOM | 314 | N   | ASN | C | 44 | -11.174 | 39.347 | -41.835 | 1.00 | 41.17 | N |
| ATOM | 315 | CA  | ASN | C | 44 | -11.067 | 37.922 | -42.000 | 1.00 | 43.18 | C |
| ATOM | 316 | C   | ASN | C | 44 | -10.505 | 37.617 | -43.403 | 1.00 | 45.68 | C |
| ATOM | 317 | O   | ASN | C | 44 | -9.846  | 36.593 | -43.589 | 1.00 | 46.72 | O |
| ATOM | 318 | CB  | ASN | C | 44 | -12.392 | 37.247 | -41.632 | 1.00 | 42.38 | C |
| ATOM | 319 | CG  | ASN | C | 44 | -12.697 | 37.297 | -40.136 | 1.00 | 45.63 | C |
| ATOM | 320 | ND2 | ASN | C | 44 | -13.935 | 37.623 | -39.789 | 1.00 | 35.36 | N |
| ATOM | 321 | OD1 | ASN | C | 44 | -11.841 | 36.994 | -39.282 | 1.00 | 45.01 | O |
| ATOM | 322 | N   | PHE | C | 45 | -10.651 | 38.539 | -44.367 | 1.00 | 49.16 | N |
| ATOM | 323 | CA  | PHE | C | 45 | -10.247 | 38.250 | -45.762 | 1.00 | 50.16 | C |
| ATOM | 324 | C   | PHE | C | 45 | -9.098  | 39.135 | -46.278 | 1.00 | 47.53 | C |
| ATOM | 325 | O   | PHE | C | 45 | -8.846  | 39.118 | -47.465 | 1.00 | 50.11 | O |
| ATOM | 326 | CB  | PHE | C | 45 | -11.489 | 38.262 | -46.666 | 1.00 | 50.35 | C |
| ATOM | 327 | CG  | PHE | C | 45 | -12.319 | 37.004 | -46.512 | 1.00 | 53.50 | C |
| ATOM | 328 | CD1 | PHE | C | 45 | -12.060 | 35.876 | -47.278 | 1.00 | 55.07 | C |
| ATOM | 329 | CD2 | PHE | C | 45 | -13.294 | 36.906 | -45.531 | 1.00 | 56.52 | C |
| ATOM | 330 | CE1 | PHE | C | 45 | -12.784 | 34.704 | -47.106 | 1.00 | 53.09 | C |
| ATOM | 331 | CE2 | PHE | C | 45 | -14.028 | 35.739 | -45.374 | 1.00 | 56.02 | C |
| ATOM | 332 | CZ  | PHE | C | 45 | -13.771 | 34.641 | -46.163 | 1.00 | 54.57 | C |
| ATOM | 333 | N   | HIS | C | 46 | -8.345  | 39.835 | -45.423 | 1.00 | 43.97 | N |
| ATOM | 334 | CA  | HIS | C | 46 | -7.162  | 40.546 | -45.940 | 1.00 | 47.11 | C |
| ATOM | 335 | C   | HIS | C | 46 | -6.039  | 39.543 | -46.251 | 1.00 | 47.21 | C |
| ATOM | 336 | O   | HIS | C | 46 | -5.815  | 38.614 | -45.507 | 1.00 | 50.18 | O |



|      |     |     |     |   |    |        |        |         |      |       |     |
|------|-----|-----|-----|---|----|--------|--------|---------|------|-------|-----|
| ATOM | 337 | CB  | HIS | C | 46 | -6.669 | 41.654 | -44.990 | 1.00 | 49.43 | C   |
| ATOM | 338 | CG  | HIS | C | 46 | -7.616 | 42.801 | -44.825 | 1.00 | 52.98 | C   |
| ATOM | 339 | CD2 | HIS | C | 46 | -8.681 | 43.198 | -45.557 | 1.00 | 49.11 | C   |
| ATOM | 340 | ND1 | HIS | C | 46 | -7.521 | 43.694 | -43.762 | 1.00 | 49.82 | N   |
| ATOM | 341 | CE1 | HIS | C | 46 | -8.486 | 44.585 | -43.854 | 1.00 | 50.94 | C   |
| ATOM | 342 | NE2 | HIS | C | 46 | -9.227 | 44.286 | -44.930 | 1.00 | 50.45 | N   |
| ATOM | 343 | N   | ASP | C | 47 | -5.309 | 39.779 | -47.343 | 1.00 | 47.18 | N   |
| ATOM | 344 | CA  | ASP | C | 47 | -4.187 | 38.930 | -47.766 | 1.00 | 48.64 | C   |
| ATOM | 345 | C   | ASP | C | 47 | -3.140 | 38.814 | -46.644 | 1.00 | 49.68 | C   |
| ATOM | 346 | O   | ASP | C | 47 | -2.410 | 37.835 | -46.575 | 1.00 | 42.80 | O   |
| ATOM | 347 | CB  | ASP | C | 47 | -3.494 | 39.464 | -49.035 | 1.00 | 52.04 | C   |
| ATOM | 348 | CG  | ASP | C | 47 | -4.387 | 39.731 | -50.251 | 1.00 | 57.25 | C   |
| ATOM | 349 | OD1 | ASP | C | 47 | -5.306 | 38.932 | -50.496 | 1.00 | 52.10 | O   |
| ATOM | 350 | OD2 | ASP | C | 47 | -4.148 | 40.751 | -50.967 | 1.00 | 65.49 | 01- |
| ATOM | 351 | N   | GLU | C | 48 | -3.028 | 39.848 | -45.798 | 1.00 | 49.67 | N   |
| ATOM | 352 | CA  | GLU | C | 48 | -1.985 | 39.919 | -44.776 | 1.00 | 42.07 | C   |
| ATOM | 353 | C   | GLU | C | 48 | -2.294 | 38.926 | -43.648 | 1.00 | 41.21 | C   |
| ATOM | 354 | O   | GLU | C | 48 | -1.380 | 38.199 | -43.212 | 1.00 | 39.59 | O   |
| ATOM | 355 | CB  | GLU | C | 48 | -1.829 | 41.360 | -44.290 | 1.00 | 43.58 | C   |
| ATOM | 356 | CG  | GLU | C | 48 | -1.428 | 42.323 | -45.397 | 1.00 | 39.71 | C   |
| ATOM | 357 | CD  | GLU | C | 48 | -2.522 | 43.222 | -45.944 | 1.00 | 38.78 | C   |
| ATOM | 358 | OE1 | GLU | C | 48 | -3.719 | 42.825 | -45.966 | 1.00 | 40.34 | O   |
| ATOM | 359 | OE2 | GLU | C | 48 | -2.171 | 44.348 | -46.337 | 1.00 | 41.87 | 01- |
| ATOM | 360 | N   | LEU | C | 49 | -3.567 | 38.830 | -43.234 | 1.00 | 39.02 | N   |
| ATOM | 361 | CA  | LEU | C | 49 | -3.997 | 37.773 | -42.279 | 1.00 | 41.88 | C   |
| ATOM | 362 | C   | LEU | C | 49 | -3.792 | 36.350 | -42.854 | 1.00 | 43.40 | C   |
| ATOM | 363 | O   | LEU | C | 49 | -3.254 | 35.485 | -42.182 | 1.00 | 47.88 | O   |
| ATOM | 364 | CB  | LEU | C | 49 | -5.459 | 37.988 | -41.886 | 1.00 | 40.31 | C   |
| ATOM | 365 | CG  | LEU | C | 49 | -5.971 | 37.044 | -40.797 | 1.00 | 38.59 | C   |
| ATOM | 366 | CD1 | LEU | C | 49 | -5.036 | 37.032 | -39.606 | 1.00 | 44.13 | C   |
| ATOM | 367 | CD2 | LEU | C | 49 | -7.359 | 37.425 | -40.339 | 1.00 | 36.85 | C   |
| ATOM | 368 | N   | PHE | C | 50 | -4.201 | 36.113 | -44.105 | 1.00 | 44.90 | N   |
| ATOM | 369 | CA  | PHE | C | 50 | -4.010 | 34.822 | -44.808 | 1.00 | 45.54 | C   |

|      |     |     |     |   |    |        |        |         |      |       |   |
|------|-----|-----|-----|---|----|--------|--------|---------|------|-------|---|
| ATOM | 370 | C   | PHE | C | 50 | -2.535 | 34.436 | -44.942 | 1.00 | 43.70 | C |
| ATOM | 371 | O   | PHE | C | 50 | -2.217 | 33.273 | -44.754 | 1.00 | 50.10 | O |
| ATOM | 372 | CB  | PHE | C | 50 | -4.640 | 34.846 | -46.198 | 1.00 | 45.61 | C |
| ATOM | 373 | CG  | PHE | C | 50 | -6.149 | 34.878 | -46.207 | 1.00 | 45.93 | C |
| ATOM | 374 | CD1 | PHE | C | 50 | -6.883 | 34.180 | -45.251 | 1.00 | 47.46 | C |
| ATOM | 375 | CD2 | PHE | C | 50 | -6.831 | 35.552 | -47.213 | 1.00 | 41.06 | C |
| ATOM | 376 | CE1 | PHE | C | 50 | -8.271 | 34.181 | -45.284 | 1.00 | 45.92 | C |
| ATOM | 377 | CE2 | PHE | C | 50 | -8.215 | 35.549 | -47.241 | 1.00 | 45.86 | C |
| ATOM | 378 | CZ  | PHE | C | 50 | -8.934 | 34.864 | -46.279 | 1.00 | 45.13 | C |
| ATOM | 379 | N   | GLN | C | 51 | -1.645 | 35.391 | -45.234 | 1.00 | 44.99 | N |
| ATOM | 380 | CA  | GLN | C | 51 | -0.203 | 35.116 | -45.195 | 1.00 | 45.12 | C |
| ATOM | 381 | C   | GLN | C | 51 | 0.235  | 34.712 | -43.767 | 1.00 | 45.15 | C |
| ATOM | 382 | O   | GLN | C | 51 | 0.984  | 33.751 | -43.620 | 1.00 | 43.21 | O |
| ATOM | 383 | CB  | GLN | C | 51 | 0.597  | 36.302 | -45.728 | 1.00 | 45.20 | C |
| ATOM | 384 | CG  | GLN | C | 51 | 2.073  | 35.980 | -45.911 | 1.00 | 57.04 | C |
| ATOM | 385 | CD  | GLN | C | 51 | 2.825  | 37.023 | -46.710 | 1.00 | 73.84 | C |
| ATOM | 386 | NE2 | GLN | C | 51 | 4.050  | 37.322 | -46.298 | 1.00 | 71.03 | N |
| ATOM | 387 | OE1 | GLN | C | 51 | 2.322  | 37.551 | -47.700 | 1.00 | 88.70 | O |
| ATOM | 388 | N   | VAL | C | 52 | -0.228 | 35.421 | -42.717 | 1.00 | 43.05 | N |
| ATOM | 389 | CA  | VAL | C | 52 | 0.153  | 35.096 | -41.317 | 1.00 | 43.27 | C |
| ATOM | 390 | C   | VAL | C | 52 | -0.394 | 33.718 | -40.916 | 1.00 | 40.71 | C |
| ATOM | 391 | O   | VAL | C | 52 | 0.282  | 32.972 | -40.230 | 1.00 | 37.50 | O |
| ATOM | 392 | CB  | VAL | C | 52 | -0.297 | 36.183 | -40.316 | 1.00 | 49.30 | C |
| ATOM | 393 | CG1 | VAL | C | 52 | -0.371 | 35.680 | -38.871 | 1.00 | 42.29 | C |
| ATOM | 394 | CG2 | VAL | C | 52 | 0.613  | 37.400 | -40.406 | 1.00 | 53.32 | C |
| ATOM | 395 | N   | ILE | C | 53 | -1.626 | 33.411 | -41.327 | 1.00 | 43.45 | N |
| ATOM | 396 | CA  | ILE | C | 53 | -2.256 | 32.103 | -41.108 | 1.00 | 43.85 | C |
| ATOM | 397 | C   | ILE | C | 53 | -1.410 | 30.983 | -41.733 | 1.00 | 41.50 | C |
| ATOM | 398 | O   | ILE | C | 53 | -1.152 | 29.993 | -41.086 | 1.00 | 45.71 | O |
| ATOM | 399 | CB  | ILE | C | 53 | -3.714 | 32.113 | -41.617 | 1.00 | 45.92 | C |
| ATOM | 400 | CG1 | ILE | C | 53 | -4.621 | 32.802 | -40.596 | 1.00 | 45.52 | C |
| ATOM | 401 | CG2 | ILE | C | 53 | -4.209 | 30.706 | -41.931 | 1.00 | 50.91 | C |
| ATOM | 402 | CD1 | ILE | C | 53 | -6.040 | 32.980 | -41.038 | 1.00 | 42.17 | C |

|      |     |     |     |   |    |        |        |         |      |       |     |
|------|-----|-----|-----|---|----|--------|--------|---------|------|-------|-----|
| ATOM | 403 | N   | ASP | C | 54 | -0.974 | 31.129 | -42.987 | 1.00 | 42.64 | N   |
| ATOM | 404 | CA  | ASP | C | 54 | -0.203 | 30.051 | -43.642 | 1.00 | 42.39 | C   |
| ATOM | 405 | C   | ASP | C | 54 | 1.115  | 29.872 | -42.879 | 1.00 | 41.54 | C   |
| ATOM | 406 | O   | ASP | C | 54 | 1.631  | 28.774 | -42.789 | 1.00 | 44.25 | O   |
| ATOM | 407 | CB  | ASP | C | 54 | 0.060  | 30.312 | -45.134 | 1.00 | 42.48 | C   |
| ATOM | 408 | CG  | ASP | C | 54 | -1.134 | 30.150 | -46.065 | 1.00 | 49.01 | C   |
| ATOM | 409 | OD1 | ASP | C | 54 | -2.168 | 29.570 | -45.648 | 1.00 | 53.64 | O   |
| ATOM | 410 | OD2 | ASP | C | 54 | -1.021 | 30.604 | -47.214 | 1.00 | 51.89 | O1- |
| ATOM | 411 | N   | GLU | C | 55 | 1.676  | 30.976 | -42.371 | 1.00 | 43.93 | N   |
| ATOM | 412 | CA  | GLU | C | 55 | 2.964  | 30.941 | -41.629 | 1.00 | 45.31 | C   |
| ATOM | 413 | C   | GLU | C | 55 | 2.784  | 30.228 | -40.282 | 1.00 | 42.85 | C   |
| ATOM | 414 | O   | GLU | C | 55 | 3.670  | 29.530 | -39.849 | 1.00 | 42.40 | O   |
| ATOM | 415 | CB  | GLU | C | 55 | 3.533  | 32.349 | -41.457 | 1.00 | 43.06 | C   |
| ATOM | 416 | CG  | GLU | C | 55 | 4.141  | 32.889 | -42.737 | 1.00 | 45.00 | C   |
| ATOM | 417 | CD  | GLU | C | 55 | 4.689  | 34.297 | -42.662 | 1.00 | 40.07 | C   |
| ATOM | 418 | OE1 | GLU | C | 55 | 4.657  | 34.872 | -41.587 | 1.00 | 39.67 | O   |
| ATOM | 419 | OE2 | GLU | C | 55 | 5.147  | 34.804 | -43.691 | 1.00 | 39.72 | O1- |
| ATOM | 420 | N   | VAL | C | 56 | 1.629  | 30.406 | -39.640 | 1.00 | 40.50 | N   |
| ATOM | 421 | CA  | VAL | C | 56 | 1.352  | 29.752 | -38.394 | 1.00 | 45.56 | C   |
| ATOM | 422 | C   | VAL | C | 56 | 1.204  | 28.247 | -38.651 | 1.00 | 48.74 | C   |
| ATOM | 423 | O   | VAL | C | 56 | 1.736  | 27.429 | -37.882 | 1.00 | 55.65 | O   |
| ATOM | 424 | CB  | VAL | C | 56 | 0.111  | 30.341 | -37.692 | 1.00 | 46.04 | C   |
| ATOM | 425 | CG1 | VAL | C | 56 | -0.401 | 29.434 | -36.576 | 1.00 | 43.65 | C   |
| ATOM | 426 | CG2 | VAL | C | 56 | 0.383  | 31.747 | -37.164 | 1.00 | 43.93 | C   |
| ATOM | 427 | N   | LYS | C | 57 | 0.470  | 27.888 | -39.707 | 1.00 | 46.21 | N   |
| ATOM | 428 | CA  | LYS | C | 57 | 0.272  | 26.474 | -40.072 | 1.00 | 46.11 | C   |
| ATOM | 429 | C   | LYS | C | 57 | 1.609  | 25.780 | -40.400 | 1.00 | 45.57 | C   |
| ATOM | 430 | O   | LYS | C | 57 | 1.785  | 24.613 | -40.040 | 1.00 | 47.91 | O   |
| ATOM | 431 | CB  | LYS | C | 57 | -0.686 | 26.343 | -41.253 | 1.00 | 44.26 | C   |
| ATOM | 432 | CG  | LYS | C | 57 | -2.153 | 26.562 | -40.910 | 1.00 | 42.42 | C   |
| ATOM | 433 | CD  | LYS | C | 57 | -3.093 | 26.072 | -41.992 | 1.00 | 41.44 | C   |
| ATOM | 434 | CE  | LYS | C | 57 | -2.641 | 26.439 | -43.393 | 1.00 | 44.04 | C   |
| ATOM | 435 | NZ  | LYS | C | 57 | -3.697 | 26.156 | -44.392 | 1.00 | 47.05 | N1+ |

|      |     |     |     |   |    |        |        |         |      |       |     |
|------|-----|-----|-----|---|----|--------|--------|---------|------|-------|-----|
| ATOM | 436 | N   | ASP | C | 58 | 2.552  | 26.495 | -41.028 | 1.00 | 40.61 | N   |
| ATOM | 437 | CA  | ASP | C | 58 | 3.860  | 25.927 | -41.336 | 1.00 | 45.50 | C   |
| ATOM | 438 | C   | ASP | C | 58 | 4.641  | 25.680 | -40.031 | 1.00 | 45.76 | C   |
| ATOM | 439 | O   | ASP | C | 58 | 5.208  | 24.624 | -39.816 | 1.00 | 44.04 | O   |
| ATOM | 440 | CB  | ASP | C | 58 | 4.671  | 26.826 | -42.275 | 1.00 | 47.16 | C   |
| ATOM | 441 | CG  | ASP | C | 58 | 4.197  | 26.909 | -43.713 | 1.00 | 48.64 | C   |
| ATOM | 442 | OD1 | ASP | C | 58 | 3.543  | 25.951 | -44.182 | 1.00 | 44.70 | O   |
| ATOM | 443 | OD2 | ASP | C | 58 | 4.548  | 27.924 | -44.369 | 1.00 | 58.87 | O1- |
| ATOM | 444 | N   | GLY | C | 59 | 4.641  | 26.682 | -39.153 | 1.00 | 48.72 | N   |
| ATOM | 445 | CA  | GLY | C | 59 | 5.320  | 26.627 | -37.875 | 1.00 | 48.72 | C   |
| ATOM | 446 | C   | GLY | C | 59 | 4.696  | 25.603 | -36.935 | 1.00 | 47.42 | C   |
| ATOM | 447 | O   | GLY | C | 59 | 5.398  | 24.969 | -36.158 | 1.00 | 49.43 | O   |
| ATOM | 448 | N   | LEU | C | 60 | 3.372  | 25.468 | -36.990 | 1.00 | 42.82 | N   |
| ATOM | 449 | CA  | LEU | C | 60 | 2.668  | 24.507 | -36.179 | 1.00 | 40.80 | C   |
| ATOM | 450 | C   | LEU | C | 60 | 3.054  | 23.094 | -36.605 | 1.00 | 41.03 | C   |
| ATOM | 451 | O   | LEU | C | 60 | 3.234  | 22.240 | -35.768 | 1.00 | 43.32 | O   |
| ATOM | 452 | CB  | LEU | C | 60 | 1.158  | 24.728 | -36.309 | 1.00 | 41.41 | C   |
| ATOM | 453 | CG  | LEU | C | 60 | 0.564  | 25.723 | -35.322 | 1.00 | 41.09 | C   |
| ATOM | 454 | CD1 | LEU | C | 60 | -0.949 | 25.641 | -35.342 | 1.00 | 42.93 | C   |
| ATOM | 455 | CD2 | LEU | C | 60 | 1.097  | 25.496 | -33.909 | 1.00 | 39.00 | C   |
| ATOM | 456 | N   | ARG | C | 61 | 3.223  | 22.885 | -37.913 | 1.00 | 44.85 | N   |
| ATOM | 457 | CA  | ARG | C | 61 | 3.718  | 21.614 | -38.430 | 1.00 | 42.48 | C   |
| ATOM | 458 | C   | ARG | C | 61 | 5.124  | 21.368 | -37.885 | 1.00 | 40.89 | C   |
| ATOM | 459 | O   | ARG | C | 61 | 5.456  | 20.239 | -37.536 | 1.00 | 46.32 | O   |
| ATOM | 460 | CB  | ARG | C | 61 | 3.670  | 21.576 | -39.964 | 1.00 | 45.60 | C   |
| ATOM | 461 | CG  | ARG | C | 61 | 2.265  | 21.368 | -40.532 | 1.00 | 45.52 | C   |
| ATOM | 462 | CD  | ARG | C | 61 | 2.219  | 21.153 | -42.033 | 1.00 | 44.64 | C   |
| ATOM | 463 | NE  | ARG | C | 61 | 2.121  | 22.404 | -42.753 | 1.00 | 43.69 | N   |
| ATOM | 464 | CZ  | ARG | C | 61 | 0.984  | 23.000 | -43.081 | 1.00 | 42.39 | C   |
| ATOM | 465 | NH1 | ARG | C | 61 | -0.186 | 22.436 | -42.819 | 1.00 | 41.44 | N1+ |
| ATOM | 466 | NH2 | ARG | C | 61 | 1.029  | 24.175 | -43.676 | 1.00 | 43.65 | N   |
| ATOM | 467 | N   | TYR | C | 62 | 5.944  | 22.418 | -37.812 | 1.00 | 41.45 | N   |
| ATOM | 468 | CA  | TYR | C | 62 | 7.328  | 22.275 | -37.334 | 1.00 | 42.42 | C   |

|      |     |     |     |   |    |        |        |         |      |       |   |
|------|-----|-----|-----|---|----|--------|--------|---------|------|-------|---|
| ATOM | 469 | C   | TYR | C | 62 | 7.369  | 21.847 | -35.861 | 1.00 | 47.17 | C |
| ATOM | 470 | O   | TYR | C | 62 | 8.147  | 20.959 | -35.498 | 1.00 | 50.03 | O |
| ATOM | 471 | CB  | TYR | C | 62 | 8.089  | 23.584 | -37.471 | 1.00 | 43.19 | C |
| ATOM | 472 | CG  | TYR | C | 62 | 9.484  | 23.587 | -36.902 | 1.00 | 44.34 | C |
| ATOM | 473 | CD1 | TYR | C | 62 | 10.435 | 22.704 | -37.364 | 1.00 | 40.09 | C |
| ATOM | 474 | CD2 | TYR | C | 62 | 9.871  | 24.504 | -35.930 | 1.00 | 49.10 | C |
| ATOM | 475 | CE1 | TYR | C | 62 | 11.729 | 22.715 | -36.877 | 1.00 | 44.11 | C |
| ATOM | 476 | CE2 | TYR | C | 62 | 11.168 | 24.534 | -35.434 | 1.00 | 47.24 | C |
| ATOM | 477 | CZ  | TYR | C | 62 | 12.107 | 23.637 | -35.922 | 1.00 | 47.78 | C |
| ATOM | 478 | OH  | TYR | C | 62 | 13.400 | 23.614 | -35.475 | 1.00 | 45.76 | O |
| ATOM | 479 | N   | ILE | C | 63 | 6.561  | 22.484 | -35.004 | 1.00 | 44.26 | N |
| ATOM | 480 | CA  | ILE | C | 63 | 6.703  | 22.241 | -33.559 | 1.00 | 43.32 | C |
| ATOM | 481 | C   | ILE | C | 63 | 5.960  | 20.947 | -33.180 | 1.00 | 46.91 | C |
| ATOM | 482 | O   | ILE | C | 63 | 6.388  | 20.249 | -32.281 | 1.00 | 54.76 | O |
| ATOM | 483 | CB  | ILE | C | 63 | 6.261  | 23.443 | -32.688 | 1.00 | 39.60 | C |
| ATOM | 484 | CG1 | ILE | C | 63 | 4.862  | 23.956 | -33.007 | 1.00 | 38.28 | C |
| ATOM | 485 | CG2 | ILE | C | 63 | 7.269  | 24.580 | -32.721 | 1.00 | 37.98 | C |
| ATOM | 486 | CD1 | ILE | C | 63 | 4.299  | 24.807 | -31.892 | 1.00 | 42.94 | C |
| ATOM | 487 | N   | PHE | C | 64 | 4.841  | 20.638 | -33.855 | 1.00 | 45.64 | N |
| ATOM | 488 | CA  | PHE | C | 64 | 4.121  | 19.364 | -33.668 | 1.00 | 43.20 | C |
| ATOM | 489 | C   | PHE | C | 64 | 4.819  | 18.190 | -34.396 | 1.00 | 43.45 | C |
| ATOM | 490 | O   | PHE | C | 64 | 4.582  | 17.048 | -34.067 | 1.00 | 45.03 | O |
| ATOM | 491 | CB  | PHE | C | 64 | 2.709  | 19.443 | -34.240 | 1.00 | 40.68 | C |
| ATOM | 492 | CG  | PHE | C | 64 | 1.641  | 20.121 | -33.422 | 1.00 | 39.98 | C |
| ATOM | 493 | CD1 | PHE | C | 64 | 1.486  | 19.860 | -32.069 | 1.00 | 42.66 | C |
| ATOM | 494 | CD2 | PHE | C | 64 | 0.700  | 20.932 | -34.040 | 1.00 | 38.55 | C |
| ATOM | 495 | CE1 | PHE | C | 64 | 0.466  | 20.461 | -31.335 | 1.00 | 43.23 | C |
| ATOM | 496 | CE2 | PHE | C | 64 | -0.333 | 21.504 | -33.305 | 1.00 | 43.90 | C |
| ATOM | 497 | CZ  | PHE | C | 64 | -0.452 | 21.274 | -31.952 | 1.00 | 39.97 | C |
| ATOM | 498 | N   | GLN | C | 65 | 5.653  | 18.478 | -35.399 | 1.00 | 40.63 | N |
| ATOM | 499 | CA  | GLN | C | 65 | 6.357  | 17.465 | -36.241 | 1.00 | 46.40 | C |
| ATOM | 500 | C   | GLN | C | 65 | 5.333  | 16.534 | -36.893 | 1.00 | 43.14 | C |
| ATOM | 501 | O   | GLN | C | 65 | 5.384  | 15.354 | -36.713 | 1.00 | 40.61 | O |

|      |     |     |     |   |    |        |        |         |      |       |     |
|------|-----|-----|-----|---|----|--------|--------|---------|------|-------|-----|
| ATOM | 502 | CB  | GLN | C | 65 | 7.410  | 16.677 | -35.461 | 1.00 | 44.06 | C   |
| ATOM | 503 | CG  | GLN | C | 65 | 8.624  | 17.510 | -35.064 | 1.00 | 45.79 | C   |
| ATOM | 504 | CD  | GLN | C | 65 | 9.610  | 17.717 | -36.187 | 1.00 | 45.40 | C   |
| ATOM | 505 | NE2 | GLN | C | 65 | 9.989  | 18.963 | -36.422 | 1.00 | 43.02 | N   |
| ATOM | 506 | OE1 | GLN | C | 65 | 10.054 | 16.769 | -36.823 | 1.00 | 50.22 | O   |
| ATOM | 507 | N   | THR | C | 66 | 4.421  | 17.153 | -37.646 | 1.00 | 51.18 | N   |
| ATOM | 508 | CA  | THR | C | 66 | 3.408  | 16.528 | -38.489 | 1.00 | 52.89 | C   |
| ATOM | 509 | C   | THR | C | 66 | 3.421  | 17.174 | -39.885 | 1.00 | 53.65 | C   |
| ATOM | 510 | O   | THR | C | 66 | 3.952  | 18.312 | -40.072 | 1.00 | 51.01 | O   |
| ATOM | 511 | CB  | THR | C | 66 | 2.005  | 16.693 | -37.890 | 1.00 | 53.53 | C   |
| ATOM | 512 | CG2 | THR | C | 66 | 1.574  | 18.145 | -37.838 | 1.00 | 53.44 | C   |
| ATOM | 513 | OG1 | THR | C | 66 | 1.049  | 15.941 | -38.642 | 1.00 | 48.41 | O   |
| ATOM | 514 | N   | GLU | C | 67 | 2.816  | 16.449 | -40.842 | 1.00 | 45.10 | N   |
| ATOM | 515 | CA  | GLU | C | 67 | 2.635  | 16.901 | -42.222 | 1.00 | 44.47 | C   |
| ATOM | 516 | C   | GLU | C | 67 | 1.145  | 17.107 | -42.495 | 1.00 | 40.30 | C   |
| ATOM | 517 | O   | GLU | C | 67 | 0.745  | 17.484 | -43.586 | 1.00 | 41.68 | O   |
| ATOM | 518 | CB  | GLU | C | 67 | 3.208  | 15.888 | -43.205 | 1.00 | 45.70 | C   |
| ATOM | 519 | CG  | GLU | C | 67 | 4.711  | 15.954 | -43.394 | 1.00 | 49.58 | C   |
| ATOM | 520 | CD  | GLU | C | 67 | 5.191  | 14.984 | -44.470 | 1.00 | 54.80 | C   |
| ATOM | 521 | OE1 | GLU | C | 67 | 4.848  | 13.774 | -44.390 | 1.00 | 56.58 | O   |
| ATOM | 522 | OE2 | GLU | C | 67 | 5.867  | 15.437 | -45.409 | 1.00 | 60.44 | O1- |
| ATOM | 523 | N   | ASN | C | 68 | 0.332  | 16.910 | -41.463 | 1.00 | 40.19 | N   |
| ATOM | 524 | CA  | ASN | C | 68 | -1.076 | 17.105 | -41.537 | 1.00 | 38.60 | C   |
| ATOM | 525 | C   | ASN | C | 68 | -1.350 | 18.439 | -42.239 | 1.00 | 47.57 | C   |
| ATOM | 526 | O   | ASN | C | 68 | -0.786 | 19.499 | -41.881 | 1.00 | 53.48 | O   |
| ATOM | 527 | CB  | ASN | C | 68 | -1.676 | 16.983 | -40.141 | 1.00 | 39.51 | C   |
| ATOM | 528 | CG  | ASN | C | 68 | -1.662 | 15.554 | -39.642 | 1.00 | 42.47 | C   |
| ATOM | 529 | ND2 | ASN | C | 68 | -1.772 | 15.356 | -38.340 | 1.00 | 40.56 | N   |
| ATOM | 530 | OD1 | ASN | C | 68 | -1.569 | 14.626 | -40.439 | 1.00 | 41.21 | O   |
| ATOM | 531 | N   | ARG | C | 69 | -2.161 | 18.358 | -43.294 | 1.00 | 50.38 | N   |
| ATOM | 532 | CA  | ARG | C | 69 | -2.724 | 19.497 | -43.940 | 1.00 | 50.33 | C   |
| ATOM | 533 | C   | ARG | C | 69 | -3.776 | 20.064 | -43.000 | 1.00 | 48.87 | C   |
| ATOM | 534 | O   | ARG | C | 69 | -3.987 | 21.279 | -42.984 | 1.00 | 54.97 | O   |

|      |     |     |     |   |    |        |        |         |      |       |     |
|------|-----|-----|-----|---|----|--------|--------|---------|------|-------|-----|
| ATOM | 535 | CB  | ARG | C | 69 | -3.351 | 19.143 | -45.295 | 1.00 | 58.87 | C   |
| ATOM | 536 | CG  | ARG | C | 69 | -2.342 | 18.990 | -46.431 | 1.00 | 65.10 | C   |
| ATOM | 537 | CD  | ARG | C | 69 | -3.001 | 18.879 | -47.801 | 1.00 | 68.20 | C   |
| ATOM | 538 | NE  | ARG | C | 69 | -3.965 | 19.950 | -48.042 | 1.00 | 65.87 | N   |
| ATOM | 539 | CZ  | ARG | C | 69 | -5.026 | 19.836 | -48.820 | 1.00 | 66.82 | C   |
| ATOM | 540 | NH1 | ARG | C | 69 | -5.227 | 18.716 | -49.490 | 1.00 | 79.63 | N1+ |
| ATOM | 541 | NH2 | ARG | C | 69 | -5.890 | 20.825 | -48.921 | 1.00 | 70.69 | N   |
| ATOM | 542 | N   | THR | C | 70 | -4.423 | 19.179 | -42.232 | 1.00 | 48.16 | N   |
| ATOM | 543 | CA  | THR | C | 70 | -5.516 | 19.589 | -41.328 | 1.00 | 49.25 | C   |
| ATOM | 544 | C   | THR | C | 70 | -4.969 | 20.084 | -39.984 | 1.00 | 49.17 | C   |
| ATOM | 545 | O   | THR | C | 70 | -5.251 | 19.505 | -38.962 | 1.00 | 50.35 | O   |
| ATOM | 546 | CB  | THR | C | 70 | -6.493 | 18.444 | -41.088 | 1.00 | 46.08 | C   |
| ATOM | 547 | CG2 | THR | C | 70 | -7.836 | 18.934 | -40.580 | 1.00 | 49.19 | C   |
| ATOM | 548 | OG1 | THR | C | 70 | -6.575 | 17.775 | -42.346 | 1.00 | 42.79 | O   |
| ATOM | 549 | N   | THR | C | 71 | -4.227 | 21.191 | -40.037 | 1.00 | 47.77 | N   |
| ATOM | 550 | CA  | THR | C | 71 | -3.515 | 21.804 | -38.944 | 1.00 | 50.67 | C   |
| ATOM | 551 | C   | THR | C | 71 | -3.977 | 23.266 | -38.835 | 1.00 | 54.60 | C   |
| ATOM | 552 | O   | THR | C | 71 | -3.807 | 24.035 | -39.798 | 1.00 | 49.39 | O   |
| ATOM | 553 | CB  | THR | C | 71 | -2.005 | 21.735 | -39.207 | 1.00 | 50.20 | C   |
| ATOM | 554 | CG2 | THR | C | 71 | -1.204 | 22.455 | -38.147 | 1.00 | 51.21 | C   |
| ATOM | 555 | OG1 | THR | C | 71 | -1.581 | 20.370 | -39.283 | 1.00 | 50.92 | O   |
| ATOM | 556 | N   | MET | C | 72 | -4.576 | 23.642 | -37.693 | 1.00 | 51.40 | N   |
| ATOM | 557 | CA  | MET | C | 72 | -5.249 | 24.956 | -37.594 | 1.00 | 48.29 | C   |
| ATOM | 558 | C   | MET | C | 72 | -5.156 | 25.498 | -36.153 | 1.00 | 46.95 | C   |
| ATOM | 559 | O   | MET | C | 72 | -4.326 | 25.015 | -35.380 | 1.00 | 45.36 | O   |
| ATOM | 560 | CB  | MET | C | 72 | -6.701 | 24.834 | -38.076 | 1.00 | 45.34 | C   |
| ATOM | 561 | CG  | MET | C | 72 | -7.629 | 24.089 | -37.155 | 1.00 | 43.84 | C   |
| ATOM | 562 | SD  | MET | C | 72 | -9.202 | 23.625 | -37.943 | 1.00 | 39.12 | S   |
| ATOM | 563 | CE  | MET | C | 72 | -8.657 | 22.077 | -38.670 | 1.00 | 42.54 | C   |
| ATOM | 564 | N   | CYS | C | 73 | -5.946 | 26.536 | -35.816 | 1.00 | 44.41 | N   |
| ATOM | 565 | CA  | CYS | C | 73 | -6.135 | 26.972 | -34.409 | 1.00 | 39.58 | C   |
| ATOM | 566 | C   | CYS | C | 73 | -7.621 | 27.144 | -34.115 | 1.00 | 37.48 | C   |
| ATOM | 567 | O   | CYS | C | 73 | -8.351 | 27.658 | -34.937 | 1.00 | 34.88 | O   |

|      |     |     |     |   |    |         |        |         |      |       |   |
|------|-----|-----|-----|---|----|---------|--------|---------|------|-------|---|
| ATOM | 568 | CB  | CYS | C | 73 | -5.469  | 28.304 | -34.084 | 1.00 | 34.77 | C |
| ATOM | 569 | SG  | CYS | C | 73 | -3.656  | 28.313 | -34.191 | 1.00 | 35.30 | S |
| ATOM | 570 | N   | ILE | C | 74 | -8.021  | 26.780 | -32.898 | 1.00 | 36.83 | N |
| ATOM | 571 | CA  | ILE | C | 74 | -9.329  | 27.157 | -32.373 | 1.00 | 41.18 | C |
| ATOM | 572 | C   | ILE | C | 74 | -9.206  | 28.482 | -31.590 | 1.00 | 45.66 | C |
| ATOM | 573 | O   | ILE | C | 74 | -8.161  | 28.739 | -30.937 | 1.00 | 42.46 | O |
| ATOM | 574 | CB  | ILE | C | 74 | -9.898  | 26.001 | -31.522 | 1.00 | 39.99 | C |
| ATOM | 575 | CG1 | ILE | C | 74 | -9.919  | 24.706 | -32.333 | 1.00 | 42.47 | C |
| ATOM | 576 | CG2 | ILE | C | 74 | -11.282 | 26.344 | -31.013 | 1.00 | 37.67 | C |
| ATOM | 577 | CD1 | ILE | C | 74 | -10.054 | 23.498 | -31.513 | 1.00 | 46.52 | C |
| ATOM | 578 | N   | THR | C | 75 | -10.274 | 29.304 | -31.661 | 1.00 | 39.32 | N |
| ATOM | 579 | CA  | THR | C | 75 | -10.380 | 30.566 | -30.980 | 1.00 | 38.43 | C |
| ATOM | 580 | C   | THR | C | 75 | -10.954 | 30.348 | -29.567 | 1.00 | 38.36 | C |
| ATOM | 581 | O   | THR | C | 75 | -12.147 | 30.150 | -29.363 | 1.00 | 38.29 | O |
| ATOM | 582 | CB  | THR | C | 75 | -11.180 | 31.574 | -31.814 | 1.00 | 42.86 | C |
| ATOM | 583 | CG2 | THR | C | 75 | -11.313 | 32.923 | -31.129 | 1.00 | 40.92 | C |
| ATOM | 584 | OG1 | THR | C | 75 | -10.507 | 31.760 | -33.065 | 1.00 | 47.65 | O |
| ATOM | 585 | N   | GLY | C | 76 | -10.060 | 30.443 | -28.582 | 1.00 | 35.45 | N |
| ATOM | 586 | CA  | GLY | C | 76 | -10.317 | 30.203 | -27.189 | 1.00 | 35.16 | C |
| ATOM | 587 | C   | GLY | C | 76 | -9.059  | 29.653 | -26.553 | 1.00 | 35.03 | C |
| ATOM | 588 | O   | GLY | C | 76 | -8.058  | 29.455 | -27.223 | 1.00 | 34.15 | O |
| ATOM | 589 | N   | SER | C | 77 | -9.121  | 29.390 | -25.251 | 1.00 | 38.81 | N |
| ATOM | 590 | CA  | SER | C | 77 | -7.987  | 28.812 | -24.514 | 1.00 | 37.62 | C |
| ATOM | 591 | C   | SER | C | 77 | -7.909  | 27.310 | -24.824 | 1.00 | 34.53 | C |
| ATOM | 592 | O   | SER | C | 77 | -8.726  | 26.785 | -25.582 | 1.00 | 32.27 | O |
| ATOM | 593 | CB  | SER | C | 77 | -8.115  | 29.102 | -23.030 | 1.00 | 37.81 | C |
| ATOM | 594 | OG  | SER | C | 77 | -9.137  | 28.321 | -22.444 | 1.00 | 38.63 | O |
| ATOM | 595 | N   | ALA | C | 78 | -6.921  | 26.645 | -24.234 | 1.00 | 31.89 | N |
| ATOM | 596 | CA  | ALA | C | 78 | -6.562  | 25.281 | -24.558 | 1.00 | 38.27 | C |
| ATOM | 597 | C   | ALA | C | 78 | -7.611  | 24.233 | -24.108 | 1.00 | 42.02 | C |
| ATOM | 598 | O   | ALA | C | 78 | -7.539  | 23.120 | -24.575 | 1.00 | 48.30 | O |
| ATOM | 599 | CB  | ALA | C | 78 | -5.192  | 24.979 | -23.995 | 1.00 | 36.68 | C |
| ATOM | 600 | N   | HIS | C | 79 | -8.572  | 24.551 | -23.224 | 1.00 | 41.72 | N |



|      |     |     |     |   |    |         |        |         |      |       |   |
|------|-----|-----|-----|---|----|---------|--------|---------|------|-------|---|
| ATOM | 601 | CA  | HIS | C | 79 | -9.764  | 23.670 | -22.983 | 1.00 | 40.07 | C |
| ATOM | 602 | C   | HIS | C | 79 | -10.482 | 23.323 | -24.297 | 1.00 | 42.88 | C |
| ATOM | 603 | O   | HIS | C | 79 | -10.933 | 22.228 | -24.531 | 1.00 | 50.06 | O |
| ATOM | 604 | CB  | HIS | C | 79 | -10.769 | 24.355 | -22.057 | 1.00 | 37.60 | C |
| ATOM | 605 | CG  | HIS | C | 79 | -10.553 | 24.062 | -20.619 | 1.00 | 37.95 | C |
| ATOM | 606 | CD2 | HIS | C | 79 | -11.213 | 23.251 | -19.772 | 1.00 | 43.40 | C |
| ATOM | 607 | ND1 | HIS | C | 79 | -9.533  | 24.620 | -19.911 | 1.00 | 38.30 | N |
| ATOM | 608 | CE1 | HIS | C | 79 | -9.568  | 24.161 | -18.682 | 1.00 | 47.03 | C |
| ATOM | 609 | NE2 | HIS | C | 79 | -10.582 | 23.314 | -18.570 | 1.00 | 42.72 | N |
| ATOM | 610 | N   | THR | C | 80 | -10.662 | 24.360 | -25.094 | 1.00 | 44.95 | N |
| ATOM | 611 | CA  | THR | C | 80 | -11.199 | 24.397 | -26.453 | 1.00 | 40.99 | C |
| ATOM | 612 | C   | THR | C | 80 | -10.620 | 23.282 | -27.328 | 1.00 | 39.46 | C |
| ATOM | 613 | O   | THR | C | 80 | -11.300 | 22.788 | -28.179 | 1.00 | 43.54 | O |
| ATOM | 614 | CB  | THR | C | 80 | -10.912 | 25.823 | -26.963 | 1.00 | 38.62 | C |
| ATOM | 615 | CG2 | THR | C | 80 | -10.170 | 25.863 | -28.272 | 1.00 | 39.17 | C |
| ATOM | 616 | OG1 | THR | C | 80 | -12.125 | 26.567 | -27.009 | 1.00 | 37.59 | O |
| ATOM | 617 | N   | GLY | C | 81 | -9.341  | 22.944 | -27.151 | 1.00 | 41.95 | N |
| ATOM | 618 | CA  | GLY | C | 81 | -8.658  | 21.945 | -27.966 | 1.00 | 43.61 | C |
| ATOM | 619 | C   | GLY | C | 81 | -9.076  | 20.535 | -27.572 | 1.00 | 51.27 | C |
| ATOM | 620 | O   | GLY | C | 81 | -9.264  | 19.662 | -28.427 | 1.00 | 56.67 | O |
| ATOM | 621 | N   | MET | C | 82 | -9.197  | 20.320 | -26.257 | 1.00 | 51.69 | N |
| ATOM | 622 | CA  | MET | C | 82 | -9.812  | 19.121 | -25.646 | 1.00 | 48.79 | C |
| ATOM | 623 | C   | MET | C | 82 | -11.295 | 19.019 | -26.076 | 1.00 | 46.27 | C |
| ATOM | 624 | O   | MET | C | 82 | -11.735 | 17.989 | -26.571 | 1.00 | 46.50 | O |
| ATOM | 625 | CB  | MET | C | 82 | -9.686  | 19.185 | -24.114 | 1.00 | 40.84 | C |
| ATOM | 626 | CG  | MET | C | 82 | -10.122 | 17.919 | -23.371 | 1.00 | 43.05 | C |
| ATOM | 627 | SD  | MET | C | 82 | -10.210 | 18.096 | -21.545 | 1.00 | 42.55 | S |
| ATOM | 628 | CE  | MET | C | 82 | -8.477  | 17.898 | -21.140 | 1.00 | 41.76 | C |
| ATOM | 629 | N   | GLU | C | 83 | -12.069 | 20.089 | -25.876 | 1.00 | 44.36 | N |
| ATOM | 630 | CA  | GLU | C | 83 | -13.493 | 20.134 | -26.279 | 1.00 | 45.42 | C |
| ATOM | 631 | C   | GLU | C | 83 | -13.642 | 19.658 | -27.729 | 1.00 | 49.06 | C |
| ATOM | 632 | O   | GLU | C | 83 | -14.492 | 18.847 | -28.027 | 1.00 | 49.83 | O |
| ATOM | 633 | CB  | GLU | C | 83 | -14.056 | 21.552 | -26.186 | 1.00 | 41.31 | C |

|      |     |     |     |   |    |         |        |         |      |       |     |
|------|-----|-----|-----|---|----|---------|--------|---------|------|-------|-----|
| ATOM | 634 | CG  | GLU | C | 83 | -14.207 | 22.046 | -24.768 | 1.00 | 40.72 | C   |
| ATOM | 635 | CD  | GLU | C | 83 | -15.510 | 21.668 | -24.118 | 1.00 | 40.46 | C   |
| ATOM | 636 | OE1 | GLU | C | 83 | -16.241 | 20.866 | -24.711 | 1.00 | 48.18 | O   |
| ATOM | 637 | OE2 | GLU | C | 83 | -15.786 | 22.175 | -23.018 | 1.00 | 42.60 | O1- |
| ATOM | 638 | N   | ALA | C | 84 | -12.784 | 20.189 | -28.610 | 1.00 | 48.92 | N   |
| ATOM | 639 | CA  | ALA | C | 84 | -12.953 | 20.072 | -30.031 | 1.00 | 44.82 | C   |
| ATOM | 640 | C   | ALA | C | 84 | -12.661 | 18.640 | -30.497 | 1.00 | 43.46 | C   |
| ATOM | 641 | O   | ALA | C | 84 | -13.275 | 18.143 | -31.436 | 1.00 | 40.18 | O   |
| ATOM | 642 | CB  | ALA | C | 84 | -12.065 | 21.075 | -30.725 | 1.00 | 42.08 | C   |
| ATOM | 643 | N   | LEU | C | 85 | -11.680 | 17.993 | -29.875 | 1.00 | 45.41 | N   |
| ATOM | 644 | CA  | LEU | C | 85 | -11.305 | 16.643 | -30.271 | 1.00 | 45.70 | C   |
| ATOM | 645 | C   | LEU | C | 85 | -12.447 | 15.684 | -29.941 | 1.00 | 52.73 | C   |
| ATOM | 646 | O   | LEU | C | 85 | -12.895 | 14.925 | -30.811 | 1.00 | 47.56 | O   |
| ATOM | 647 | CB  | LEU | C | 85 | -10.037 | 16.224 | -29.536 | 1.00 | 42.31 | C   |
| ATOM | 648 | CG  | LEU | C | 85 | -8.746  | 16.800 | -30.100 | 1.00 | 40.67 | C   |
| ATOM | 649 | CD1 | LEU | C | 85 | -7.551  | 16.190 | -29.382 | 1.00 | 39.24 | C   |
| ATOM | 650 | CD2 | LEU | C | 85 | -8.658  | 16.569 | -31.602 | 1.00 | 38.92 | C   |
| ATOM | 651 | N   | LEU | C | 86 | -12.927 | 15.764 | -28.693 | 1.00 | 56.01 | N   |
| ATOM | 652 | CA  | LEU | C | 86 | -14.010 | 14.897 | -28.216 | 1.00 | 58.83 | C   |
| ATOM | 653 | C   | LEU | C | 86 | -15.296 | 15.159 | -29.027 | 1.00 | 55.57 | C   |
| ATOM | 654 | O   | LEU | C | 86 | -15.925 | 14.233 | -29.515 | 1.00 | 56.31 | O   |
| ATOM | 655 | CB  | LEU | C | 86 | -14.216 | 15.116 | -26.710 | 1.00 | 57.81 | C   |
| ATOM | 656 | CG  | LEU | C | 86 | -13.000 | 14.876 | -25.801 | 1.00 | 55.83 | C   |
| ATOM | 657 | CD1 | LEU | C | 86 | -13.394 | 15.088 | -24.355 | 1.00 | 57.65 | C   |
| ATOM | 658 | CD2 | LEU | C | 86 | -12.388 | 13.498 | -25.972 | 1.00 | 47.93 | C   |
| ATOM | 659 | N   | CYS | C | 87 | -15.654 | 16.432 | -29.199 | 1.00 | 54.15 | N   |
| ATOM | 660 | CA  | CYS | C | 87 | -16.935 | 16.858 | -29.791 | 1.00 | 52.74 | C   |
| ATOM | 661 | C   | CYS | C | 87 | -17.060 | 16.413 | -31.256 | 1.00 | 53.88 | C   |
| ATOM | 662 | O   | CYS | C | 87 | -18.165 | 16.031 | -31.716 | 1.00 | 56.71 | O   |
| ATOM | 663 | CB  | CYS | C | 87 | -17.078 | 18.372 | -29.730 | 1.00 | 48.90 | C   |
| ATOM | 664 | SG  | CYS | C | 87 | -18.665 | 18.980 | -30.349 | 1.00 | 45.67 | S   |
| ATOM | 665 | N   | ASN | C | 88 | -15.944 | 16.491 | -31.985 | 1.00 | 50.24 | N   |
| ATOM | 666 | CA  | ASN | C | 88 | -15.909 | 16.131 | -33.385 | 1.00 | 51.55 | C   |

|      |     |     |     |   |    |         |        |         |      |       |     |
|------|-----|-----|-----|---|----|---------|--------|---------|------|-------|-----|
| ATOM | 667 | C   | ASN | C | 88 | -15.836 | 14.607 | -33.546 | 1.00 | 53.74 | C   |
| ATOM | 668 | O   | ASN | C | 88 | -16.560 | 14.080 | -34.367 | 1.00 | 60.48 | O   |
| ATOM | 669 | CB  | ASN | C | 88 | -14.742 | 16.768 | -34.139 | 1.00 | 53.33 | C   |
| ATOM | 670 | CG  | ASN | C | 88 | -14.936 | 18.244 | -34.396 | 1.00 | 54.33 | C   |
| ATOM | 671 | ND2 | ASN | C | 88 | -14.987 | 19.038 | -33.342 | 1.00 | 59.19 | N   |
| ATOM | 672 | OD1 | ASN | C | 88 | -15.038 | 18.664 | -35.537 | 1.00 | 60.25 | O   |
| ATOM | 673 | N   | LEU | C | 89 | -14.980 | 13.908 | -32.781 | 1.00 | 50.22 | N   |
| ATOM | 674 | CA  | LEU | C | 89 | -14.670 | 12.505 | -33.086 | 1.00 | 43.42 | C   |
| ATOM | 675 | C   | LEU | C | 89 | -15.616 | 11.517 | -32.381 | 1.00 | 45.98 | C   |
| ATOM | 676 | O   | LEU | C | 89 | -15.457 | 10.311 | -32.582 | 1.00 | 54.59 | O   |
| ATOM | 677 | CB  | LEU | C | 89 | -13.218 | 12.203 | -32.720 | 1.00 | 41.50 | C   |
| ATOM | 678 | CG  | LEU | C | 89 | -12.149 | 12.787 | -33.629 | 1.00 | 44.49 | C   |
| ATOM | 679 | CD1 | LEU | C | 89 | -10.770 | 12.623 | -32.996 | 1.00 | 48.88 | C   |
| ATOM | 680 | CD2 | LEU | C | 89 | -12.173 | 12.143 | -35.010 | 1.00 | 45.19 | C   |
| ATOM | 681 | N   | LEU | C | 90 | -16.578 | 11.975 | -31.566 | 1.00 | 50.36 | N   |
| ATOM | 682 | CA  | LEU | C | 90 | -17.528 | 11.041 | -30.870 | 1.00 | 49.98 | C   |
| ATOM | 683 | C   | LEU | C | 90 | -18.990 | 11.448 | -31.115 | 1.00 | 51.54 | C   |
| ATOM | 684 | O   | LEU | C | 90 | -19.371 | 12.611 | -30.932 | 1.00 | 45.22 | O   |
| ATOM | 685 | CB  | LEU | C | 90 | -17.240 | 10.998 | -29.365 | 1.00 | 55.15 | C   |
| ATOM | 686 | CG  | LEU | C | 90 | -15.768 | 10.863 | -28.955 | 1.00 | 54.26 | C   |
| ATOM | 687 | CD1 | LEU | C | 90 | -15.609 | 11.184 | -27.472 | 1.00 | 53.66 | C   |
| ATOM | 688 | CD2 | LEU | C | 90 | -15.216 | 9.481  | -29.277 | 1.00 | 49.32 | C   |
| ATOM | 689 | N   | GLU | C | 91 | -19.787 | 10.452 | -31.540 | 1.00 | 55.70 | N   |
| ATOM | 690 | CA  | GLU | C | 91 | -21.250 | 10.497 | -31.622 | 1.00 | 54.67 | C   |
| ATOM | 691 | C   | GLU | C | 91 | -21.833 | 9.894  | -30.337 | 1.00 | 52.74 | C   |
| ATOM | 692 | O   | GLU | C | 91 | -21.112 | 9.261  | -29.599 | 1.00 | 51.85 | O   |
| ATOM | 693 | CB  | GLU | C | 91 | -21.705 | 9.710  | -32.849 | 1.00 | 57.48 | C   |
| ATOM | 694 | CG  | GLU | C | 91 | -20.970 | 10.098 | -34.118 | 1.00 | 61.32 | C   |
| ATOM | 695 | CD  | GLU | C | 91 | -21.511 | 9.468  | -35.390 | 1.00 | 62.12 | C   |
| ATOM | 696 | OE1 | GLU | C | 91 | -20.811 | 8.591  | -35.977 | 1.00 | 57.55 | O   |
| ATOM | 697 | OE2 | GLU | C | 91 | -22.633 | 9.853  | -35.781 | 1.00 | 59.67 | O1- |
| ATOM | 698 | N   | GLU | C | 92 | -23.132 | 10.091 | -30.077 | 1.00 | 54.57 | N   |
| ATOM | 699 | CA  | GLU | C | 92 | -23.800 | 9.501  | -28.896 | 1.00 | 60.87 | C   |

|      |     |     |     |   |    |         |        |         |      |       |     |
|------|-----|-----|-----|---|----|---------|--------|---------|------|-------|-----|
| ATOM | 700 | C   | GLU | C | 92 | -23.488 | 8.003  | -28.854 | 1.00 | 60.80 | C   |
| ATOM | 701 | O   | GLU | C | 92 | -23.672 | 7.341  | -29.865 | 1.00 | 68.90 | O   |
| ATOM | 702 | CB  | GLU | C | 92 | -25.323 | 9.629  | -28.964 | 1.00 | 64.58 | C   |
| ATOM | 703 | CG  | GLU | C | 92 | -25.819 | 11.063 | -28.977 | 1.00 | 72.25 | C   |
| ATOM | 704 | CD  | GLU | C | 92 | -25.931 | 11.750 | -27.624 | 1.00 | 77.46 | C   |
| ATOM | 705 | OE1 | GLU | C | 92 | -26.112 | 12.990 | -27.619 | 1.00 | 62.37 | O   |
| ATOM | 706 | OE2 | GLU | C | 92 | -25.858 | 11.050 | -26.575 | 1.00 | 86.27 | O1- |
| ATOM | 707 | N   | GLY | C | 93 | -22.969 | 7.509  | -27.719 | 1.00 | 55.02 | N   |
| ATOM | 708 | CA  | GLY | C | 93 | -22.756 | 6.079  | -27.482 | 1.00 | 52.11 | C   |
| ATOM | 709 | C   | GLY | C | 93 | -21.402 | 5.525  | -27.928 | 1.00 | 53.73 | C   |
| ATOM | 710 | O   | GLY | C | 93 | -21.053 | 4.393  | -27.523 | 1.00 | 57.73 | O   |
| ATOM | 711 | N   | ASP | C | 94 | -20.624 | 6.272  | -28.737 | 1.00 | 56.15 | N   |
| ATOM | 712 | CA  | ASP | C | 94 | -19.241 | 5.841  | -29.144 | 1.00 | 53.36 | C   |
| ATOM | 713 | C   | ASP | C | 94 | -18.382 | 5.708  | -27.887 | 1.00 | 55.46 | C   |
| ATOM | 714 | O   | ASP | C | 94 | -18.610 | 6.373  | -26.876 | 1.00 | 60.17 | O   |
| ATOM | 715 | CB  | ASP | C | 94 | -18.541 | 6.790  | -30.123 | 1.00 | 52.90 | C   |
| ATOM | 716 | CG  | ASP | C | 94 | -19.299 | 7.056  | -31.410 | 1.00 | 58.28 | C   |
| ATOM | 717 | OD1 | ASP | C | 94 | -20.397 | 6.482  | -31.565 | 1.00 | 61.78 | O   |
| ATOM | 718 | OD2 | ASP | C | 94 | -18.806 | 7.870  | -32.237 | 1.00 | 59.53 | O1- |
| ATOM | 719 | N   | ILE | C | 95 | -17.380 | 4.839  | -27.964 | 1.00 | 64.34 | N   |
| ATOM | 720 | CA  | ILE | C | 95 | -16.644 | 4.412  | -26.788 | 1.00 | 64.12 | C   |
| ATOM | 721 | C   | ILE | C | 95 | -15.306 | 5.162  | -26.750 | 1.00 | 63.13 | C   |
| ATOM | 722 | O   | ILE | C | 95 | -14.468 | 5.010  | -27.665 | 1.00 | 58.91 | O   |
| ATOM | 723 | CB  | ILE | C | 95 | -16.458 | 2.878  | -26.798 | 1.00 | 65.67 | C   |
| ATOM | 724 | CG1 | ILE | C | 95 | -17.770 | 2.133  | -26.510 | 1.00 | 63.27 | C   |
| ATOM | 725 | CG2 | ILE | C | 95 | -15.342 | 2.450  | -25.847 | 1.00 | 64.34 | C   |
| ATOM | 726 | CD1 | ILE | C | 95 | -17.661 | 0.608  | -26.628 | 1.00 | 59.36 | C   |
| ATOM | 727 | N   | VAL | C | 96 | -15.104 | 5.931  | -25.672 | 1.00 | 57.55 | N   |
| ATOM | 728 | CA  | VAL | C | 96 | -13.842 | 6.620  | -25.435 | 1.00 | 54.74 | C   |
| ATOM | 729 | C   | VAL | C | 96 | -13.184 | 6.054  | -24.162 | 1.00 | 54.28 | C   |
| ATOM | 730 | O   | VAL | C | 96 | -13.812 | 5.891  | -23.105 | 1.00 | 48.93 | O   |
| ATOM | 731 | CB  | VAL | C | 96 | -14.032 | 8.153  | -25.380 | 1.00 | 50.12 | C   |
| ATOM | 732 | CG1 | VAL | C | 96 | -14.797 | 8.604  | -24.143 | 1.00 | 51.40 | C   |

|      |     |     |     |   |     |         |        |         |      |       |   |
|------|-----|-----|-----|---|-----|---------|--------|---------|------|-------|---|
| ATOM | 733 | CG2 | VAL | C | 96  | -12.702 | 8.880  | -25.484 | 1.00 | 44.75 | C |
| ATOM | 734 | N   | LEU | C | 97  | -11.889 | 5.766  | -24.283 | 1.00 | 50.32 | N |
| ATOM | 735 | CA  | LEU | C | 97  | -11.082 | 5.372  | -23.165 | 1.00 | 53.83 | C |
| ATOM | 736 | C   | LEU | C | 97  | -10.220 | 6.562  | -22.729 | 1.00 | 55.43 | C |
| ATOM | 737 | O   | LEU | C | 97  | -9.416  | 7.105  | -23.523 | 1.00 | 55.31 | O |
| ATOM | 738 | CB  | LEU | C | 97  | -10.199 | 4.200  | -23.612 | 1.00 | 58.32 | C |
| ATOM | 739 | CG  | LEU | C | 97  | -9.251  | 3.635  | -22.558 | 1.00 | 51.89 | C |
| ATOM | 740 | CD1 | LEU | C | 97  | -10.002 | 3.366  | -21.263 | 1.00 | 56.09 | C |
| ATOM | 741 | CD2 | LEU | C | 97  | -8.570  | 2.370  | -23.064 | 1.00 | 48.94 | C |
| ATOM | 742 | N   | ILE | C | 98  | -10.317 | 6.924  | -21.451 | 1.00 | 50.01 | N |
| ATOM | 743 | CA  | ILE | C | 98  | -9.508  | 8.015  | -20.935 | 1.00 | 50.65 | C |
| ATOM | 744 | C   | ILE | C | 98  | -8.538  | 7.484  | -19.874 | 1.00 | 48.46 | C |
| ATOM | 745 | O   | ILE | C | 98  | -8.983  | 6.928  | -18.894 | 1.00 | 46.07 | O |
| ATOM | 746 | CB  | ILE | C | 98  | -10.408 | 9.133  | -20.378 | 1.00 | 52.77 | C |
| ATOM | 747 | CG1 | ILE | C | 98  | -11.358 | 9.676  | -21.452 | 1.00 | 48.58 | C |
| ATOM | 748 | CG2 | ILE | C | 98  | -9.535  | 10.223 | -19.772 | 1.00 | 58.17 | C |
| ATOM | 749 | CD1 | ILE | C | 98  | -12.473 | 10.537 | -20.925 | 1.00 | 48.01 | C |
| ATOM | 750 | N   | ALA | C | 99  | -7.224  | 7.683  | -20.091 | 1.00 | 51.95 | N |
| ATOM | 751 | CA  | ALA | C | 99  | -6.157  | 7.421  | -19.088 | 1.00 | 48.80 | C |
| ATOM | 752 | C   | ALA | C | 99  | -6.100  | 8.562  | -18.060 | 1.00 | 53.61 | C |
| ATOM | 753 | O   | ALA | C | 99  | -5.537  | 9.617  | -18.364 | 1.00 | 61.74 | O |
| ATOM | 754 | CB  | ALA | C | 99  | -4.827  | 7.268  | -19.777 | 1.00 | 46.07 | C |
| ATOM | 755 | N   | ASN | C | 100 | -6.656  | 8.319  | -16.858 | 1.00 | 52.98 | N |
| ATOM | 756 | CA  | ASN | C | 100 | -6.800  | 9.303  | -15.777 | 1.00 | 52.18 | C |
| ATOM | 757 | C   | ASN | C | 100 | -5.810  | 9.042  | -14.636 | 1.00 | 56.46 | C |
| ATOM | 758 | O   | ASN | C | 100 | -6.098  | 8.210  | -13.770 | 1.00 | 57.91 | O |
| ATOM | 759 | CB  | ASN | C | 100 | -8.192  | 9.271  | -15.138 | 1.00 | 54.38 | C |
| ATOM | 760 | CG  | ASN | C | 100 | -8.265  | 10.012 | -13.814 | 1.00 | 53.45 | C |
| ATOM | 761 | ND2 | ASN | C | 100 | -9.223  | 9.668  | -12.974 | 1.00 | 55.33 | N |
| ATOM | 762 | OD1 | ASN | C | 100 | -7.454  | 10.884 | -13.529 | 1.00 | 62.53 | O |
| ATOM | 763 | N   | ASN | C | 101 | -4.695  | 9.795  | -14.601 | 1.00 | 56.76 | N |
| ATOM | 764 | CA  | ASN | C | 101 | -3.930  | 10.001 | -13.346 | 1.00 | 55.20 | C |
| ATOM | 765 | C   | ASN | C | 101 | -3.765  | 11.513 | -13.084 | 1.00 | 49.59 | C |

|      |     |     |     |   |     |        |        |         |      |       |   |
|------|-----|-----|-----|---|-----|--------|--------|---------|------|-------|---|
| ATOM | 766 | O   | ASN | C | 101 | -2.780 | 11.970 | -12.493 | 1.00 | 45.71 | O |
| ATOM | 767 | CB  | ASN | C | 101 | -2.627 | 9.187  | -13.314 | 1.00 | 54.50 | C |
| ATOM | 768 | CG  | ASN | C | 101 | -1.731 | 9.460  | -14.495 | 1.00 | 56.07 | C |
| ATOM | 769 | ND2 | ASN | C | 101 | -0.598 | 8.783  | -14.567 | 1.00 | 53.88 | N |
| ATOM | 770 | OD1 | ASN | C | 101 | -2.081 | 10.271 | -15.344 | 1.00 | 66.92 | O |
| ATOM | 771 | N   | GLY | C | 102 | -4.791 | 12.290 | -13.435 | 1.00 | 50.66 | N |
| ATOM | 772 | CA  | GLY | C | 102 | -4.725 | 13.735 | -13.295 | 1.00 | 53.37 | C |
| ATOM | 773 | C   | GLY | C | 102 | -6.065 | 14.406 | -13.523 | 1.00 | 54.65 | C |
| ATOM | 774 | O   | GLY | C | 102 | -6.984 | 13.800 | -14.057 | 1.00 | 49.35 | O |
| ATOM | 775 | N   | ILE | C | 103 | -6.147 | 15.688 | -13.140 | 1.00 | 52.47 | N |
| ATOM | 776 | CA  | ILE | C | 103 | -7.380 | 16.455 | -13.239 | 1.00 | 48.62 | C |
| ATOM | 777 | C   | ILE | C | 103 | -7.681 | 16.821 | -14.698 | 1.00 | 44.62 | C |
| ATOM | 778 | O   | ILE | C | 103 | -8.839 | 16.997 | -15.085 | 1.00 | 42.37 | O |
| ATOM | 779 | CB  | ILE | C | 103 | -7.311 | 17.689 | -12.336 | 1.00 | 50.58 | C |
| ATOM | 780 | CG1 | ILE | C | 103 | -8.702 | 18.275 | -12.106 | 1.00 | 46.56 | C |
| ATOM | 781 | CG2 | ILE | C | 103 | -6.315 | 18.695 | -12.891 | 1.00 | 58.90 | C |
| ATOM | 782 | CD1 | ILE | C | 103 | -8.765 | 19.256 | -10.955 | 1.00 | 52.10 | C |
| ATOM | 783 | N   | TRP | C | 104 | -6.643 | 16.901 | -15.525 | 1.00 | 44.90 | N |
| ATOM | 784 | CA  | TRP | C | 104 | -6.851 | 17.170 | -16.933 | 1.00 | 45.15 | C |
| ATOM | 785 | C   | TRP | C | 104 | -7.668 | 16.041 | -17.566 | 1.00 | 45.65 | C |
| ATOM | 786 | O   | TRP | C | 104 | -8.463 | 16.309 | -18.431 | 1.00 | 54.09 | O |
| ATOM | 787 | CB  | TRP | C | 104 | -5.532 | 17.453 | -17.658 | 1.00 | 46.04 | C |
| ATOM | 788 | CG  | TRP | C | 104 | -4.834 | 18.650 | -17.095 | 1.00 | 49.65 | C |
| ATOM | 789 | CD1 | TRP | C | 104 | -3.581 | 18.676 | -16.553 | 1.00 | 50.86 | C |
| ATOM | 790 | CD2 | TRP | C | 104 | -5.392 | 19.970 | -16.909 | 1.00 | 51.58 | C |
| ATOM | 791 | CE2 | TRP | C | 104 | -4.393 | 20.747 | -16.279 | 1.00 | 53.98 | C |
| ATOM | 792 | CE3 | TRP | C | 104 | -6.611 | 20.584 | -17.237 | 1.00 | 48.21 | C |
| ATOM | 793 | NE1 | TRP | C | 104 | -3.309 | 19.929 | -16.073 | 1.00 | 55.99 | N |
| ATOM | 794 | CZ2 | TRP | C | 104 | -4.586 | 22.097 | -15.966 | 1.00 | 50.23 | C |
| ATOM | 795 | CZ3 | TRP | C | 104 | -6.799 | 21.920 | -16.933 | 1.00 | 46.57 | C |
| ATOM | 796 | CH2 | TRP | C | 104 | -5.801 | 22.661 | -16.299 | 1.00 | 48.55 | C |
| ATOM | 797 | N   | ALA | C | 105 | -7.543 | 14.808 | -17.066 | 1.00 | 46.68 | N |
| ATOM | 798 | CA  | ALA | C | 105 | -8.362 | 13.688 | -17.558 | 1.00 | 42.24 | C |

|      |     |     |     |   |     |         |        |         |      |       |     |
|------|-----|-----|-----|---|-----|---------|--------|---------|------|-------|-----|
| ATOM | 799 | C   | ALA | C | 105 | -9.773  | 13.735 | -16.954 | 1.00 | 42.88 | C   |
| ATOM | 800 | O   | ALA | C | 105 | -10.775 | 13.401 | -17.636 | 1.00 | 39.49 | O   |
| ATOM | 801 | CB  | ALA | C | 105 | -7.659  | 12.390 | -17.300 | 1.00 | 45.22 | C   |
| ATOM | 802 | N   | GLU | C | 106 | -9.887  | 14.219 | -15.712 | 1.00 | 46.17 | N   |
| ATOM | 803 | CA  | GLU | C | 106 | -11.212 | 14.414 | -15.117 | 1.00 | 49.73 | C   |
| ATOM | 804 | C   | GLU | C | 106 | -12.024 | 15.369 | -15.993 | 1.00 | 47.00 | C   |
| ATOM | 805 | O   | GLU | C | 106 | -13.231 | 15.160 | -16.161 | 1.00 | 45.38 | O   |
| ATOM | 806 | CB  | GLU | C | 106 | -11.125 | 14.918 | -13.675 | 1.00 | 56.54 | C   |
| ATOM | 807 | CG  | GLU | C | 106 | -10.466 | 13.921 | -12.724 | 1.00 | 62.31 | C   |
| ATOM | 808 | CD  | GLU | C | 106 | -10.864 | 14.052 | -11.261 | 1.00 | 66.11 | C   |
| ATOM | 809 | OE1 | GLU | C | 106 | -11.121 | 15.188 | -10.815 | 1.00 | 67.79 | O   |
| ATOM | 810 | OE2 | GLU | C | 106 | -10.933 | 13.007 | -10.576 | 1.00 | 74.96 | O1- |
| ATOM | 811 | N   | ARG | C | 107 | -11.354 | 16.409 | -16.530 | 1.00 | 53.01 | N   |
| ATOM | 812 | CA  | ARG | C | 107 | -11.969 | 17.411 | -17.453 | 1.00 | 45.55 | C   |
| ATOM | 813 | C   | ARG | C | 107 | -12.459 | 16.664 | -18.686 | 1.00 | 39.90 | C   |
| ATOM | 814 | O   | ARG | C | 107 | -13.628 | 16.723 | -19.022 | 1.00 | 34.33 | O   |
| ATOM | 815 | CB  | ARG | C | 107 | -10.992 | 18.510 | -17.894 | 1.00 | 46.62 | C   |
| ATOM | 816 | CG  | ARG | C | 107 | -10.604 | 19.515 | -16.818 | 1.00 | 46.66 | C   |
| ATOM | 817 | CD  | ARG | C | 107 | -11.779 | 20.331 | -16.319 | 1.00 | 49.55 | C   |
| ATOM | 818 | NE  | ARG | C | 107 | -11.423 | 21.690 | -15.912 | 1.00 | 48.68 | N   |
| ATOM | 819 | CZ  | ARG | C | 107 | -11.385 | 22.113 | -14.671 | 1.00 | 43.36 | C   |
| ATOM | 820 | NH1 | ARG | C | 107 | -11.367 | 21.234 | -13.681 | 1.00 | 46.83 | N1+ |
| ATOM | 821 | NH2 | ARG | C | 107 | -11.391 | 23.413 | -14.428 | 1.00 | 42.47 | N   |
| ATOM | 822 | N   | ALA | C | 108 | -11.555 | 15.889 | -19.289 | 1.00 | 34.82 | N   |
| ATOM | 823 | CA  | ALA | C | 108 | -11.900 | 15.128 | -20.473 | 1.00 | 38.75 | C   |
| ATOM | 824 | C   | ALA | C | 108 | -13.130 | 14.240 | -20.208 | 1.00 | 45.25 | C   |
| ATOM | 825 | O   | ALA | C | 108 | -14.070 | 14.238 | -21.020 | 1.00 | 53.74 | O   |
| ATOM | 826 | CB  | ALA | C | 108 | -10.711 | 14.331 | -20.941 | 1.00 | 38.91 | C   |
| ATOM | 827 | N   | ILE | C | 109 | -13.134 | 13.487 | -19.093 | 1.00 | 42.50 | N   |
| ATOM | 828 | CA  | ILE | C | 109 | -14.252 | 12.604 | -18.771 | 1.00 | 43.97 | C   |
| ATOM | 829 | C   | ILE | C | 109 | -15.553 | 13.431 | -18.762 | 1.00 | 45.92 | C   |
| ATOM | 830 | O   | ILE | C | 109 | -16.544 | 13.021 | -19.353 | 1.00 | 49.36 | O   |
| ATOM | 831 | CB  | ILE | C | 109 | -13.990 | 11.845 | -17.447 | 1.00 | 44.91 | C   |

|      |     |     |     |   |     |         |        |         |      |       |   |
|------|-----|-----|-----|---|-----|---------|--------|---------|------|-------|---|
| ATOM | 832 | CG1 | ILE | C | 109 | -12.908 | 10.781 | -17.619 | 1.00 | 45.98 | C |
| ATOM | 833 | CG2 | ILE | C | 109 | -15.251 | 11.236 | -16.854 | 1.00 | 41.93 | C |
| ATOM | 834 | CD1 | ILE | C | 109 | -12.253 | 10.365 | -16.314 | 1.00 | 48.28 | C |
| ATOM | 835 | N   | ASN | C | 110 | -15.520 | 14.609 | -18.133 | 1.00 | 45.25 | N |
| ATOM | 836 | CA  | ASN | C | 110 | -16.699 | 15.488 | -17.959 | 1.00 | 44.66 | C |
| ATOM | 837 | C   | ASN | C | 110 | -17.248 | 15.891 | -19.336 | 1.00 | 47.07 | C |
| ATOM | 838 | O   | ASN | C | 110 | -18.441 | 15.783 | -19.610 | 1.00 | 45.19 | O |
| ATOM | 839 | CB  | ASN | C | 110 | -16.325 | 16.693 | -17.089 | 1.00 | 40.89 | C |
| ATOM | 840 | CG  | ASN | C | 110 | -17.445 | 17.686 | -16.873 | 1.00 | 40.81 | C |
| ATOM | 841 | ND2 | ASN | C | 110 | -17.808 | 17.932 | -15.621 | 1.00 | 41.53 | N |
| ATOM | 842 | OD1 | ASN | C | 110 | -17.953 | 18.272 | -17.817 | 1.00 | 48.25 | O |
| ATOM | 843 | N   | MET | C | 111 | -16.360 | 16.381 | -20.198 | 1.00 | 49.89 | N |
| ATOM | 844 | CA  | MET | C | 111 | -16.711 | 16.772 | -21.546 | 1.00 | 53.20 | C |
| ATOM | 845 | C   | MET | C | 111 | -17.317 | 15.569 | -22.278 | 1.00 | 55.60 | C |
| ATOM | 846 | O   | MET | C | 111 | -18.415 | 15.678 | -22.841 | 1.00 | 56.17 | O |
| ATOM | 847 | CB  | MET | C | 111 | -15.488 | 17.254 | -22.335 | 1.00 | 55.92 | C |
| ATOM | 848 | CG  | MET | C | 111 | -15.092 | 18.705 | -22.064 | 1.00 | 54.44 | C |
| ATOM | 849 | SD  | MET | C | 111 | -13.393 | 19.029 | -22.628 | 1.00 | 50.40 | S |
| ATOM | 850 | CE  | MET | C | 111 | -13.059 | 20.512 | -21.679 | 1.00 | 56.40 | C |
| ATOM | 851 | N   | ALA | C | 112 | -16.593 | 14.441 | -22.284 | 1.00 | 52.80 | N |
| ATOM | 852 | CA  | ALA | C | 112 | -16.998 | 13.266 | -23.094 | 1.00 | 52.42 | C |
| ATOM | 853 | C   | ALA | C | 112 | -18.409 | 12.787 | -22.700 | 1.00 | 52.71 | C |
| ATOM | 854 | O   | ALA | C | 112 | -19.215 | 12.492 | -23.564 | 1.00 | 56.67 | O |
| ATOM | 855 | CB  | ALA | C | 112 | -15.977 | 12.178 | -22.953 | 1.00 | 49.80 | C |
| ATOM | 856 | N   | THR | C | 113 | -18.705 | 12.765 | -21.397 | 1.00 | 48.34 | N |
| ATOM | 857 | CA  | THR | C | 113 | -20.045 | 12.533 | -20.878 | 1.00 | 51.68 | C |
| ATOM | 858 | C   | THR | C | 113 | -21.026 | 13.577 | -21.435 | 1.00 | 54.02 | C |
| ATOM | 859 | O   | THR | C | 113 | -22.049 | 13.220 | -22.018 | 1.00 | 52.92 | O |
| ATOM | 860 | CB  | THR | C | 113 | -20.083 | 12.569 | -19.340 | 1.00 | 52.91 | C |
| ATOM | 861 | CG2 | THR | C | 113 | -21.448 | 12.252 | -18.762 | 1.00 | 49.10 | C |
| ATOM | 862 | OG1 | THR | C | 113 | -19.128 | 11.636 | -18.835 | 1.00 | 55.46 | O |
| ATOM | 863 | N   | ARG | C | 114 | -20.725 | 14.864 | -21.239 | 1.00 | 57.24 | N |
| ATOM | 864 | CA  | ARG | C | 114 | -21.620 | 15.943 | -21.695 | 1.00 | 54.86 | C |



|      |     |     |     |   |     |         |        |         |      |       |     |
|------|-----|-----|-----|---|-----|---------|--------|---------|------|-------|-----|
| ATOM | 865 | C   | ARG | C | 114 | -22.022 | 15.690 | -23.148 | 1.00 | 52.15 | C   |
| ATOM | 866 | O   | ARG | C | 114 | -23.188 | 15.832 | -23.479 | 1.00 | 51.90 | O   |
| ATOM | 867 | CB  | ARG | C | 114 | -20.979 | 17.324 | -21.502 | 1.00 | 57.46 | C   |
| ATOM | 868 | CG  | ARG | C | 114 | -20.998 | 17.807 | -20.055 | 1.00 | 60.59 | C   |
| ATOM | 869 | CD  | ARG | C | 114 | -20.011 | 18.909 | -19.673 | 1.00 | 53.56 | C   |
| ATOM | 870 | NE  | ARG | C | 114 | -20.687 | 20.172 | -19.462 | 1.00 | 52.80 | N   |
| ATOM | 871 | CZ  | ARG | C | 114 | -20.967 | 20.702 | -18.281 | 1.00 | 52.73 | C   |
| ATOM | 872 | NH1 | ARG | C | 114 | -20.282 | 20.350 | -17.212 | 1.00 | 50.81 | N1+ |
| ATOM | 873 | NH2 | ARG | C | 114 | -21.924 | 21.606 | -18.184 | 1.00 | 56.11 | N   |
| ATOM | 874 | N   | TYR | C | 115 | -21.055 | 15.265 | -23.978 | 1.00 | 55.51 | N   |
| ATOM | 875 | CA  | TYR | C | 115 | -21.251 | 15.040 | -25.418 | 1.00 | 55.18 | C   |
| ATOM | 876 | C   | TYR | C | 115 | -21.956 | 13.701 | -25.694 | 1.00 | 56.77 | C   |
| ATOM | 877 | O   | TYR | C | 115 | -22.372 | 13.447 | -26.825 | 1.00 | 53.95 | O   |
| ATOM | 878 | CB  | TYR | C | 115 | -19.912 | 15.129 | -26.161 | 1.00 | 57.52 | C   |
| ATOM | 879 | CG  | TYR | C | 115 | -19.390 | 16.534 | -26.361 | 1.00 | 59.13 | C   |
| ATOM | 880 | CD1 | TYR | C | 115 | -20.193 | 17.552 | -26.852 | 1.00 | 56.51 | C   |
| ATOM | 881 | CD2 | TYR | C | 115 | -18.081 | 16.851 | -26.038 | 1.00 | 58.40 | C   |
| ATOM | 882 | CE1 | TYR | C | 115 | -19.706 | 18.842 | -27.006 | 1.00 | 59.86 | C   |
| ATOM | 883 | CE2 | TYR | C | 115 | -17.575 | 18.128 | -26.205 | 1.00 | 59.53 | C   |
| ATOM | 884 | CZ  | TYR | C | 115 | -18.385 | 19.131 | -26.694 | 1.00 | 59.52 | C   |
| ATOM | 885 | OH  | TYR | C | 115 | -17.856 | 20.381 | -26.862 | 1.00 | 51.62 | O   |
| ATOM | 886 | N   | GLY | C | 116 | -22.075 | 12.848 | -24.668 | 1.00 | 57.96 | N   |
| ATOM | 887 | CA  | GLY | C | 116 | -22.976 | 11.687 | -24.688 | 1.00 | 54.81 | C   |
| ATOM | 888 | C   | GLY | C | 116 | -22.255 | 10.400 | -25.041 | 1.00 | 52.47 | C   |
| ATOM | 889 | O   | GLY | C | 116 | -22.887 | 9.438  | -25.475 | 1.00 | 50.79 | O   |
| ATOM | 890 | N   | ALA | C | 117 | -20.928 | 10.388 | -24.862 | 1.00 | 50.90 | N   |
| ATOM | 891 | CA  | ALA | C | 117 | -20.111 | 9.225  | -25.150 | 1.00 | 51.48 | C   |
| ATOM | 892 | C   | ALA | C | 117 | -20.291 | 8.216  | -24.019 | 1.00 | 53.54 | C   |
| ATOM | 893 | O   | ALA | C | 117 | -20.799 | 8.553  | -22.958 | 1.00 | 51.38 | O   |
| ATOM | 894 | CB  | ALA | C | 117 | -18.659 | 9.604  | -25.300 | 1.00 | 53.40 | C   |
| ATOM | 895 | N   | ASP | C | 118 | -19.874 | 6.979  | -24.304 | 1.00 | 58.39 | N   |
| ATOM | 896 | CA  | ASP | C | 118 | -19.794 | 5.881  | -23.371 | 1.00 | 56.35 | C   |
| ATOM | 897 | C   | ASP | C | 118 | -18.360 | 5.845  | -22.842 | 1.00 | 56.22 | C   |

|      |     |     |     |   |     |         |        |         |      |       |     |
|------|-----|-----|-----|---|-----|---------|--------|---------|------|-------|-----|
| ATOM | 898 | O   | ASP | C | 118 | -17.422 | 5.342  | -23.516 | 1.00 | 51.31 | O   |
| ATOM | 899 | CB  | ASP | C | 118 | -20.189 | 4.566  | -24.061 | 1.00 | 62.79 | C   |
| ATOM | 900 | CG  | ASP | C | 118 | -20.148 | 3.333  | -23.174 | 1.00 | 55.97 | C   |
| ATOM | 901 | OD1 | ASP | C | 118 | -19.947 | 3.497  | -21.961 | 1.00 | 53.79 | O   |
| ATOM | 902 | OD2 | ASP | C | 118 | -20.315 | 2.217  | -23.711 | 1.00 | 53.71 | O1- |
| ATOM | 903 | N   | VAL | C | 119 | -18.197 | 6.376  | -21.627 | 1.00 | 54.54 | N   |
| ATOM | 904 | CA  | VAL | C | 119 | -16.887 | 6.711  | -21.116 | 1.00 | 52.24 | C   |
| ATOM | 905 | C   | VAL | C | 119 | -16.359 | 5.501  | -20.353 | 1.00 | 52.58 | C   |
| ATOM | 906 | O   | VAL | C | 119 | -17.017 | 5.041  | -19.440 | 1.00 | 59.12 | O   |
| ATOM | 907 | CB  | VAL | C | 119 | -16.916 | 7.964  | -20.216 | 1.00 | 53.45 | C   |
| ATOM | 908 | CG1 | VAL | C | 119 | -15.499 | 8.384  | -19.856 | 1.00 | 56.67 | C   |
| ATOM | 909 | CG2 | VAL | C | 119 | -17.677 | 9.136  | -20.840 | 1.00 | 53.40 | C   |
| ATOM | 910 | N   | ARG | C | 120 | -15.178 | 5.023  | -20.751 | 1.00 | 51.21 | N   |
| ATOM | 911 | CA  | ARG | C | 120 | -14.400 | 4.065  | -19.998 | 1.00 | 53.10 | C   |
| ATOM | 912 | C   | ARG | C | 120 | -13.139 | 4.771  | -19.464 | 1.00 | 55.55 | C   |
| ATOM | 913 | O   | ARG | C | 120 | -12.486 | 5.561  | -20.164 | 1.00 | 58.13 | O   |
| ATOM | 914 | CB  | ARG | C | 120 | -14.041 | 2.856  | -20.880 | 1.00 | 56.03 | C   |
| ATOM | 915 | CG  | ARG | C | 120 | -15.175 | 2.325  | -21.756 | 1.00 | 56.72 | C   |
| ATOM | 916 | CD  | ARG | C | 120 | -16.384 | 1.864  | -20.950 | 1.00 | 58.57 | C   |
| ATOM | 917 | NE  | ARG | C | 120 | -17.552 | 1.504  | -21.755 | 1.00 | 61.94 | N   |
| ATOM | 918 | CZ  | ARG | C | 120 | -17.736 | 0.321  | -22.369 | 1.00 | 56.77 | C   |
| ATOM | 919 | NH1 | ARG | C | 120 | -16.755 | -0.566 | -22.461 | 1.00 | 45.16 | N1+ |
| ATOM | 920 | NH2 | ARG | C | 120 | -18.920 | 0.035  | -22.874 | 1.00 | 45.15 | N   |
| ATOM | 921 | N   | VAL | C | 121 | -12.786 | 4.457  | -18.218 | 1.00 | 57.38 | N   |
| ATOM | 922 | CA  | VAL | C | 121 | -11.649 | 5.043  | -17.553 | 1.00 | 60.70 | C   |
| ATOM | 923 | C   | VAL | C | 121 | -10.614 | 3.934  | -17.323 | 1.00 | 62.94 | C   |
| ATOM | 924 | O   | VAL | C | 121 | -10.960 | 2.765  | -17.189 | 1.00 | 72.61 | O   |
| ATOM | 925 | CB  | VAL | C | 121 | -12.057 | 5.756  | -16.243 | 1.00 | 60.75 | C   |
| ATOM | 926 | CG1 | VAL | C | 121 | -10.892 | 6.500  | -15.612 | 1.00 | 67.50 | C   |
| ATOM | 927 | CG2 | VAL | C | 121 | -13.219 | 6.718  | -16.440 | 1.00 | 56.88 | C   |
| ATOM | 928 | N   | LEU | C | 122 | -9.339  | 4.337  | -17.353 | 1.00 | 64.73 | N   |
| ATOM | 929 | CA  | LEU | C | 122 | -8.176  | 3.583  | -16.899 | 1.00 | 58.87 | C   |
| ATOM | 930 | C   | LEU | C | 122 | -7.534  | 4.420  | -15.782 | 1.00 | 58.97 | C   |

|      |     |     |     |   |     |         |        |         |      |       |     |
|------|-----|-----|-----|---|-----|---------|--------|---------|------|-------|-----|
| ATOM | 931 | O   | LEU | C | 122 | -6.793  | 5.369  | -16.044 | 1.00 | 70.51 | O   |
| ATOM | 932 | CB  | LEU | C | 122 | -7.271  | 3.333  | -18.116 | 1.00 | 56.66 | C   |
| ATOM | 933 | CG  | LEU | C | 122 | -5.779  | 3.089  | -17.868 | 1.00 | 63.33 | C   |
| ATOM | 934 | CD1 | LEU | C | 122 | -5.544  | 1.987  | -16.841 | 1.00 | 64.51 | C   |
| ATOM | 935 | CD2 | LEU | C | 122 | -5.063  | 2.763  | -19.179 | 1.00 | 61.88 | C   |
| ATOM | 936 | N   | GLU | C | 123 | -7.909  | 4.107  | -14.534 | 1.00 | 62.41 | N   |
| ATOM | 937 | CA  | GLU | C | 123 | -7.548  | 4.884  | -13.323 | 1.00 | 61.94 | C   |
| ATOM | 938 | C   | GLU | C | 123 | -6.083  | 4.580  | -12.994 | 1.00 | 55.42 | C   |
| ATOM | 939 | O   | GLU | C | 123 | -5.566  | 3.562  | -13.434 | 1.00 | 56.52 | O   |
| ATOM | 940 | CB  | GLU | C | 123 | -8.455  | 4.544  | -12.126 | 1.00 | 61.29 | C   |
| ATOM | 941 | CG  | GLU | C | 123 | -9.943  | 4.435  | -12.439 | 1.00 | 66.59 | C   |
| ATOM | 942 | CD  | GLU | C | 123 | -10.851 | 5.568  | -11.968 | 1.00 | 74.65 | C   |
| ATOM | 943 | OE1 | GLU | C | 123 | -11.866 | 5.271  | -11.277 | 1.00 | 76.25 | O   |
| ATOM | 944 | OE2 | GLU | C | 123 | -10.584 | 6.736  | -12.336 | 1.00 | 69.60 | O1- |
| ATOM | 945 | N   | GLY | C | 124 | -5.423  | 5.460  | -12.233 | 1.00 | 55.79 | N   |
| ATOM | 946 | CA  | GLY | C | 124 | -3.982  | 5.302  | -11.942 | 1.00 | 56.47 | C   |
| ATOM | 947 | C   | GLY | C | 124 | -3.469  | 6.275  | -10.883 | 1.00 | 57.48 | C   |
| ATOM | 948 | O   | GLY | C | 124 | -4.184  | 7.186  | -10.455 | 1.00 | 50.87 | O   |
| ATOM | 949 | N   | PRO | C | 125 | -2.215  | 6.083  | -10.404 | 1.00 | 64.07 | N   |
| ATOM | 950 | CA  | PRO | C | 125 | -1.598  | 7.007  | -9.452  | 1.00 | 63.12 | C   |
| ATOM | 951 | C   | PRO | C | 125 | -0.972  | 8.217  | -10.170 | 1.00 | 65.42 | C   |
| ATOM | 952 | O   | PRO | C | 125 | -0.459  | 8.111  | -11.304 | 1.00 | 73.12 | O   |
| ATOM | 953 | CB  | PRO | C | 125 | -0.566  | 6.120  | -8.733  | 1.00 | 61.59 | C   |
| ATOM | 954 | CG  | PRO | C | 125 | -0.170  | 5.072  | -9.756  | 1.00 | 62.23 | C   |
| ATOM | 955 | CD  | PRO | C | 125 | -1.343  | 4.936  | -10.710 | 1.00 | 64.74 | C   |
| ATOM | 956 | N   | ALA | C | 126 | -1.027  | 9.365  | -9.499  | 1.00 | 58.61 | N   |
| ATOM | 957 | CA  | ALA | C | 126 | -0.718  | 10.628 | -10.109 | 1.00 | 56.65 | C   |
| ATOM | 958 | C   | ALA | C | 126 | 0.795   | 10.780 | -10.294 | 1.00 | 57.68 | C   |
| ATOM | 959 | O   | ALA | C | 126 | 1.235   | 11.557 | -11.146 | 1.00 | 57.20 | O   |
| ATOM | 960 | CB  | ALA | C | 126 | -1.292  | 11.738 | -9.268  | 1.00 | 59.35 | C   |
| ATOM | 961 | N   | ASP | C | 127 | 1.585   | 10.027 | -9.518  | 1.00 | 56.92 | N   |
| ATOM | 962 | CA  | ASP | C | 127 | 3.037   | 10.199 | -9.501  | 1.00 | 53.82 | C   |
| ATOM | 963 | C   | ASP | C | 127 | 3.742   | 9.112  | -10.321 | 1.00 | 50.06 | C   |

|      |     |     |     |   |     |        |        |         |      |       |     |
|------|-----|-----|-----|---|-----|--------|--------|---------|------|-------|-----|
| ATOM | 964 | O   | ASP | C | 127 | 4.968  | 9.025  | -10.277 | 1.00 | 51.00 | O   |
| ATOM | 965 | CB  | ASP | C | 127 | 3.584  | 10.259 | -8.069  | 1.00 | 61.87 | C   |
| ATOM | 966 | CG  | ASP | C | 127 | 3.303  | 9.035  | -7.207  | 1.00 | 61.07 | C   |
| ATOM | 967 | OD1 | ASP | C | 127 | 2.756  | 8.049  | -7.735  | 1.00 | 59.03 | O   |
| ATOM | 968 | OD2 | ASP | C | 127 | 3.630  | 9.091  | -6.008  | 1.00 | 62.80 | O1- |
| ATOM | 969 | N   | LYS | C | 128 | 3.002  | 8.306  | -11.086 | 1.00 | 50.09 | N   |
| ATOM | 970 | CA  | LYS | C | 128 | 3.652  | 7.289  | -11.910 | 1.00 | 55.54 | C   |
| ATOM | 971 | C   | LYS | C | 128 | 2.910  | 7.143  | -13.227 | 1.00 | 51.16 | C   |
| ATOM | 972 | O   | LYS | C | 128 | 1.674  | 7.152  | -13.247 | 1.00 | 49.04 | O   |
| ATOM | 973 | CB  | LYS | C | 128 | 3.748  | 5.951  | -11.173 | 1.00 | 66.06 | C   |
| ATOM | 974 | CG  | LYS | C | 128 | 4.772  | 5.959  | -10.039 | 1.00 | 79.01 | C   |
| ATOM | 975 | CD  | LYS | C | 128 | 5.147  | 4.613  | -9.457  | 1.00 | 84.06 | C   |
| ATOM | 976 | CE  | LYS | C | 128 | 6.050  | 4.761  | -8.250  | 1.00 | 87.33 | C   |
| ATOM | 977 | NZ  | LYS | C | 128 | 6.444  | 3.446  | -7.689  | 1.00 | 90.96 | N1+ |
| ATOM | 978 | N   | PRO | C | 129 | 3.666  | 6.986  | -14.339 | 1.00 | 45.62 | N   |
| ATOM | 979 | CA  | PRO | C | 129 | 3.089  | 6.807  | -15.674 | 1.00 | 53.58 | C   |
| ATOM | 980 | C   | PRO | C | 129 | 2.385  | 5.455  | -15.906 | 1.00 | 60.19 | C   |
| ATOM | 981 | O   | PRO | C | 129 | 2.599  | 4.493  | -15.150 | 1.00 | 56.15 | O   |
| ATOM | 982 | CB  | PRO | C | 129 | 4.315  | 6.864  | -16.605 | 1.00 | 49.39 | C   |
| ATOM | 983 | CG  | PRO | C | 129 | 5.456  | 6.373  | -15.748 | 1.00 | 47.34 | C   |
| ATOM | 984 | CD  | PRO | C | 129 | 5.135  | 6.888  | -14.356 | 1.00 | 47.27 | C   |
| ATOM | 985 | N   | PHE | C | 130 | 1.564  | 5.379  | -16.959 | 1.00 | 58.73 | N   |
| ATOM | 986 | CA  | PHE | C | 130 | 1.082  | 4.092  | -17.424 | 1.00 | 58.98 | C   |
| ATOM | 987 | C   | PHE | C | 130 | 2.160  | 3.443  | -18.295 | 1.00 | 54.08 | C   |
| ATOM | 988 | O   | PHE | C | 130 | 2.845  | 4.125  | -19.059 | 1.00 | 52.90 | O   |
| ATOM | 989 | CB  | PHE | C | 130 | -0.232 | 4.225  | -18.191 | 1.00 | 60.72 | C   |
| ATOM | 990 | CG  | PHE | C | 130 | -1.339 | 4.853  | -17.392 | 1.00 | 59.62 | C   |
| ATOM | 991 | CD1 | PHE | C | 130 | -1.531 | 6.226  | -17.417 | 1.00 | 57.47 | C   |
| ATOM | 992 | CD2 | PHE | C | 130 | -2.187 | 4.075  | -16.623 | 1.00 | 56.24 | C   |
| ATOM | 993 | CE1 | PHE | C | 130 | -2.558 | 6.805  | -16.686 | 1.00 | 61.30 | C   |
| ATOM | 994 | CE2 | PHE | C | 130 | -3.213 | 4.657  | -15.895 | 1.00 | 58.83 | C   |
| ATOM | 995 | CZ  | PHE | C | 130 | -3.399 | 6.019  | -15.928 | 1.00 | 61.51 | C   |
| ATOM | 996 | N   | SER | C | 131 | 2.287  | 2.118  | -18.155 | 1.00 | 52.36 | N   |

|      |      |     |     |   |     |        |        |         |      |       |     |
|------|------|-----|-----|---|-----|--------|--------|---------|------|-------|-----|
| ATOM | 997  | CA  | SER | C | 131 | 3.081  | 1.255  | -19.048 | 1.00 | 52.91 | C   |
| ATOM | 998  | C   | SER | C | 131 | 2.298  | 1.001  | -20.343 | 1.00 | 46.01 | C   |
| ATOM | 999  | O   | SER | C | 131 | 1.081  | 1.177  | -20.396 | 1.00 | 42.45 | O   |
| ATOM | 1000 | CB  | SER | C | 131 | 3.368  | -0.045 | -18.356 | 1.00 | 51.41 | C   |
| ATOM | 1001 | OG  | SER | C | 131 | 2.129  | -0.625 | -17.937 | 1.00 | 48.74 | O   |
| ATOM | 1002 | N   | MET | C | 132 | 2.983  | 0.519  | -21.373 | 1.00 | 50.15 | N   |
| ATOM | 1003 | CA  | MET | C | 132 | 2.293  | 0.103  | -22.600 | 1.00 | 56.58 | C   |
| ATOM | 1004 | C   | MET | C | 132 | 1.372  | -1.099 | -22.333 | 1.00 | 63.23 | C   |
| ATOM | 1005 | O   | MET | C | 132 | 0.259  | -1.166 | -22.901 | 1.00 | 60.05 | O   |
| ATOM | 1006 | CB  | MET | C | 132 | 3.288  | -0.250 | -23.707 | 1.00 | 55.54 | C   |
| ATOM | 1007 | CG  | MET | C | 132 | 3.910  | 0.985  | -24.328 | 1.00 | 57.77 | C   |
| ATOM | 1008 | SD  | MET | C | 132 | 2.717  | 2.343  | -24.561 | 1.00 | 59.11 | S   |
| ATOM | 1009 | CE  | MET | C | 132 | 3.705  | 3.703  | -23.941 | 1.00 | 59.48 | C   |
| ATOM | 1010 | N   | THR | C | 133 | 1.809  | -2.027 | -21.466 | 1.00 | 59.62 | N   |
| ATOM | 1011 | CA  | THR | C | 133 | 0.997  | -3.225 | -21.205 | 1.00 | 61.21 | C   |
| ATOM | 1012 | C   | THR | C | 133 | -0.262 | -2.779 | -20.446 | 1.00 | 58.69 | C   |
| ATOM | 1013 | O   | THR | C | 133 | -1.346 | -3.310 | -20.686 | 1.00 | 66.51 | O   |
| ATOM | 1014 | CB  | THR | C | 133 | 1.799  | -4.386 | -20.573 | 1.00 | 66.37 | C   |
| ATOM | 1015 | CG2 | THR | C | 133 | 3.300  | -4.295 | -20.781 | 1.00 | 65.02 | C   |
| ATOM | 1016 | OG1 | THR | C | 133 | 1.511  | -4.492 | -19.176 | 1.00 | 63.79 | O   |
| ATOM | 1017 | N   | ASP | C | 134 | -0.141 | -1.775 | -19.566 | 1.00 | 56.38 | N   |
| ATOM | 1018 | CA  | ASP | C | 134 | -1.320 | -1.190 | -18.925 | 1.00 | 56.21 | C   |
| ATOM | 1019 | C   | ASP | C | 134 | -2.301 | -0.717 | -20.016 | 1.00 | 55.58 | C   |
| ATOM | 1020 | O   | ASP | C | 134 | -3.484 | -1.028 | -19.950 | 1.00 | 56.10 | O   |
| ATOM | 1021 | CB  | ASP | C | 134 | -0.952 | -0.090 | -17.920 | 1.00 | 59.90 | C   |
| ATOM | 1022 | CG  | ASP | C | 134 | -0.473 | -0.547 | -16.540 | 1.00 | 64.08 | C   |
| ATOM | 1023 | OD1 | ASP | C | 134 | -0.840 | -1.668 | -16.106 | 1.00 | 57.81 | O   |
| ATOM | 1024 | OD2 | ASP | C | 134 | 0.261  | 0.242  | -15.883 | 1.00 | 63.78 | O1- |
| ATOM | 1025 | N   | PHE | C | 135 | -1.805 | -0.002 | -21.038 | 1.00 | 57.16 | N   |
| ATOM | 1026 | CA  | PHE | C | 135 | -2.660 | 0.563  | -22.114 | 1.00 | 57.24 | C   |
| ATOM | 1027 | C   | PHE | C | 135 | -3.283 | -0.526 | -23.012 | 1.00 | 58.23 | C   |
| ATOM | 1028 | O   | PHE | C | 135 | -4.494 | -0.510 | -23.201 | 1.00 | 52.86 | O   |
| ATOM | 1029 | CB  | PHE | C | 135 | -1.876 | 1.529  | -23.007 | 1.00 | 60.66 | C   |

|      |      |     |     |   |     |        |        |         |      |       |     |
|------|------|-----|-----|---|-----|--------|--------|---------|------|-------|-----|
| ATOM | 1030 | CG  | PHE | C | 135 | -1.689 | 2.923  | -22.465 | 1.00 | 54.36 | C   |
| ATOM | 1031 | CD1 | PHE | C | 135 | -2.774 | 3.743  | -22.220 | 1.00 | 54.10 | C   |
| ATOM | 1032 | CD2 | PHE | C | 135 | -0.414 | 3.430  | -22.250 | 1.00 | 52.10 | C   |
| ATOM | 1033 | CE1 | PHE | C | 135 | -2.588 | 5.032  | -21.738 | 1.00 | 49.59 | C   |
| ATOM | 1034 | CE2 | PHE | C | 135 | -0.234 | 4.711  | -21.763 | 1.00 | 46.28 | C   |
| ATOM | 1035 | CZ  | PHE | C | 135 | -1.322 | 5.513  | -21.521 | 1.00 | 47.77 | C   |
| ATOM | 1036 | N   | LYS | C | 136 | -2.464 | -1.425 | -23.596 | 1.00 | 59.89 | N   |
| ATOM | 1037 | CA  | LYS | C | 136 | -2.954 | -2.589 | -24.403 | 1.00 | 63.43 | C   |
| ATOM | 1038 | C   | LYS | C | 136 | -4.148 | -3.287 | -23.732 | 1.00 | 59.52 | C   |
| ATOM | 1039 | O   | LYS | C | 136 | -5.206 | -3.441 | -24.346 | 1.00 | 61.19 | O   |
| ATOM | 1040 | CB  | LYS | C | 136 | -1.897 | -3.674 | -24.630 | 1.00 | 65.65 | C   |
| ATOM | 1041 | CG  | LYS | C | 136 | -2.241 | -4.628 | -25.773 | 1.00 | 78.15 | C   |
| ATOM | 1042 | CD  | LYS | C | 136 | -1.867 | -6.105 | -25.584 | 1.00 | 86.67 | C   |
| ATOM | 1043 | CE  | LYS | C | 136 | -0.415 | -6.448 | -25.870 | 1.00 | 86.60 | C   |
| ATOM | 1044 | NZ  | LYS | C | 136 | 0.118  | -5.733 | -27.055 | 1.00 | 84.59 | N1+ |
| ATOM | 1045 | N   | LYS | C | 137 | -3.960 | -3.709 | -22.480 | 1.00 | 56.58 | N   |
| ATOM | 1046 | CA  | LYS | C | 137 | -4.943 | -4.506 | -21.741 | 1.00 | 62.84 | C   |
| ATOM | 1047 | C   | LYS | C | 137 | -6.286 | -3.771 | -21.572 | 1.00 | 58.55 | C   |
| ATOM | 1048 | O   | LYS | C | 137 | -7.309 | -4.416 | -21.448 | 1.00 | 69.52 | O   |
| ATOM | 1049 | CB  | LYS | C | 137 | -4.367 | -4.908 | -20.379 | 1.00 | 62.84 | C   |
| ATOM | 1050 | CG  | LYS | C | 137 | -3.474 | -6.143 | -20.383 | 1.00 | 66.53 | C   |
| ATOM | 1051 | CD  | LYS | C | 137 | -3.126 | -6.590 | -18.969 | 1.00 | 76.05 | C   |
| ATOM | 1052 | CE  | LYS | C | 137 | -2.819 | -8.066 | -18.823 | 1.00 | 76.78 | C   |
| ATOM | 1053 | NZ  | LYS | C | 137 | -2.886 | -8.479 | -17.399 | 1.00 | 76.95 | N1+ |
| ATOM | 1054 | N   | ALA | C | 138 | -6.282 | -2.433 | -21.534 | 1.00 | 58.79 | N   |
| ATOM | 1055 | CA  | ALA | C | 138 | -7.493 | -1.620 | -21.345 | 1.00 | 56.09 | C   |
| ATOM | 1056 | C   | ALA | C | 138 | -8.225 | -1.391 | -22.683 | 1.00 | 56.00 | C   |
| ATOM | 1057 | O   | ALA | C | 138 | -9.494 | -1.373 | -22.742 | 1.00 | 48.43 | O   |
| ATOM | 1058 | CB  | ALA | C | 138 | -7.104 | -0.319 | -20.683 | 1.00 | 62.27 | C   |
| ATOM | 1059 | N   | ILE | C | 139 | -7.431 | -1.188 | -23.749 | 1.00 | 57.62 | N   |
| ATOM | 1060 | CA  | ILE | C | 139 | -7.915 | -1.144 | -25.156 | 1.00 | 64.99 | C   |
| ATOM | 1061 | C   | ILE | C | 139 | -8.578 | -2.495 | -25.496 | 1.00 | 59.55 | C   |
| ATOM | 1062 | O   | ILE | C | 139 | -9.718 | -2.511 | -25.946 | 1.00 | 49.49 | O   |

|      |      |     |     |   |     |         |        |         |      |       |     |
|------|------|-----|-----|---|-----|---------|--------|---------|------|-------|-----|
| ATOM | 1063 | CB  | ILE | C | 139 | -6.771  | -0.759 | -26.138 | 1.00 | 64.30 | C   |
| ATOM | 1064 | CG1 | ILE | C | 139 | -6.322  | 0.693  | -25.954 | 1.00 | 61.16 | C   |
| ATOM | 1065 | CG2 | ILE | C | 139 | -7.163  | -1.003 | -27.589 | 1.00 | 63.80 | C   |
| ATOM | 1066 | CD1 | ILE | C | 139 | -5.061  | 1.053  | -26.706 | 1.00 | 62.61 | C   |
| ATOM | 1067 | N   | GLU | C | 140 | -7.840  | -3.599 | -25.293 | 1.00 | 61.13 | N   |
| ATOM | 1068 | CA  | GLU | C | 140 | -8.348  | -5.004 | -25.283 | 1.00 | 62.87 | C   |
| ATOM | 1069 | C   | GLU | C | 140 | -9.784  | -5.085 | -24.725 | 1.00 | 58.98 | C   |
| ATOM | 1070 | O   | GLU | C | 140 | -10.737 | -5.463 | -25.426 | 1.00 | 49.34 | O   |
| ATOM | 1071 | CB  | GLU | C | 140 | -7.440  | -5.861 | -24.393 | 1.00 | 70.96 | C   |
| ATOM | 1072 | CG  | GLU | C | 140 | -6.239  | -6.481 | -25.088 | 1.00 | 80.10 | C   |
| ATOM | 1073 | CD  | GLU | C | 140 | -6.393  | -7.949 | -25.447 | 1.00 | 87.90 | C   |
| ATOM | 1074 | OE1 | GLU | C | 140 | -7.527  | -8.474 | -25.344 | 1.00 | 97.08 | O   |
| ATOM | 1075 | OE2 | GLU | C | 140 | -5.384  | -8.560 | -25.840 | 1.00 | 93.87 | O1- |
| ATOM | 1076 | N   | GLN | C | 141 | -9.928  | -4.731 | -23.442 | 1.00 | 54.23 | N   |
| ATOM | 1077 | CA  | GLN | C | 141 | -11.161 | -4.904 | -22.693 | 1.00 | 55.58 | C   |
| ATOM | 1078 | C   | GLN | C | 141 | -12.284 | -4.071 | -23.322 | 1.00 | 53.85 | C   |
| ATOM | 1079 | O   | GLN | C | 141 | -13.392 | -4.553 | -23.429 | 1.00 | 54.21 | O   |
| ATOM | 1080 | CB  | GLN | C | 141 | -10.974 | -4.538 | -21.215 | 1.00 | 57.66 | C   |
| ATOM | 1081 | CG  | GLN | C | 141 | -12.283 | -4.553 | -20.425 | 1.00 | 61.70 | C   |
| ATOM | 1082 | CD  | GLN | C | 141 | -12.141 | -4.122 | -18.983 | 1.00 | 66.16 | C   |
| ATOM | 1083 | NE2 | GLN | C | 141 | -13.281 | -3.923 | -18.334 | 1.00 | 61.80 | N   |
| ATOM | 1084 | OE1 | GLN | C | 141 | -11.037 | -3.963 | -18.450 | 1.00 | 61.49 | O   |
| ATOM | 1085 | N   | HIS | C | 142 | -11.989 | -2.824 | -23.727 | 1.00 | 59.07 | N   |
| ATOM | 1086 | CA  | HIS | C | 142 | -13.042 | -1.811 | -23.977 | 1.00 | 54.52 | C   |
| ATOM | 1087 | C   | HIS | C | 142 | -13.327 | -1.628 | -25.466 | 1.00 | 50.16 | C   |
| ATOM | 1088 | O   | HIS | C | 142 | -14.453 | -1.250 | -25.831 | 1.00 | 53.11 | O   |
| ATOM | 1089 | CB  | HIS | C | 142 | -12.684 | -0.510 | -23.260 | 1.00 | 57.51 | C   |
| ATOM | 1090 | CG  | HIS | C | 142 | -12.888 | -0.627 | -21.786 | 1.00 | 57.24 | C   |
| ATOM | 1091 | CD2 | HIS | C | 142 | -14.019 | -0.737 | -21.051 | 1.00 | 54.91 | C   |
| ATOM | 1092 | ND1 | HIS | C | 142 | -11.833 | -0.714 | -20.899 | 1.00 | 59.03 | N   |
| ATOM | 1093 | CE1 | HIS | C | 142 | -12.305 | -0.834 | -19.669 | 1.00 | 55.53 | C   |
| ATOM | 1094 | NE2 | HIS | C | 142 | -13.648 | -0.847 | -19.739 | 1.00 | 55.59 | N   |
| ATOM | 1095 | N   | ARG | C | 143 | -12.326 | -1.934 | -26.299 | 1.00 | 50.50 | N   |

|      |      |     |     |   |     |         |        |         |      |       |     |
|------|------|-----|-----|---|-----|---------|--------|---------|------|-------|-----|
| ATOM | 1096 | CA  | ARG | C | 143 | -12.434 | -1.894 | -27.752 | 1.00 | 57.22 | C   |
| ATOM | 1097 | C   | ARG | C | 143 | -12.904 | -0.496 | -28.156 | 1.00 | 64.94 | C   |
| ATOM | 1098 | O   | ARG | C | 143 | -13.953 | -0.339 | -28.774 | 1.00 | 70.33 | O   |
| ATOM | 1099 | CB  | ARG | C | 143 | -13.362 | -3.019 | -28.243 | 1.00 | 60.11 | C   |
| ATOM | 1100 | CG  | ARG | C | 143 | -12.784 | -4.431 | -28.149 | 1.00 | 61.49 | C   |
| ATOM | 1101 | CD  | ARG | C | 143 | -11.304 | -4.482 | -28.510 | 1.00 | 61.21 | C   |
| ATOM | 1102 | NE  | ARG | C | 143 | -10.887 | -5.616 | -29.327 | 1.00 | 65.31 | N   |
| ATOM | 1103 | CZ  | ARG | C | 143 | -10.148 | -6.625 | -28.899 | 1.00 | 66.07 | C   |
| ATOM | 1104 | NH1 | ARG | C | 143 | -10.177 | -6.978 | -27.625 | 1.00 | 66.66 | N1+ |
| ATOM | 1105 | NH2 | ARG | C | 143 | -9.352  | -7.254 | -29.747 | 1.00 | 62.02 | N   |
| ATOM | 1106 | N   | PRO | C | 144 | -12.143 | 0.570  | -27.812 | 1.00 | 65.96 | N   |
| ATOM | 1107 | CA  | PRO | C | 144 | -12.641 | 1.940  | -27.907 | 1.00 | 61.54 | C   |
| ATOM | 1108 | C   | PRO | C | 144 | -12.359 | 2.621  | -29.256 | 1.00 | 52.14 | C   |
| ATOM | 1109 | O   | PRO | C | 144 | -11.384 | 2.293  | -29.939 | 1.00 | 44.34 | O   |
| ATOM | 1110 | CB  | PRO | C | 144 | -11.830 | 2.621  | -26.790 | 1.00 | 65.65 | C   |
| ATOM | 1111 | CG  | PRO | C | 144 | -10.467 | 1.960  | -26.878 | 1.00 | 66.39 | C   |
| ATOM | 1112 | CD  | PRO | C | 144 | -10.745 | 0.539  | -27.342 | 1.00 | 69.66 | C   |
| ATOM | 1113 | N   | LYS | C | 145 | -13.203 | 3.602  | -29.584 | 1.00 | 47.52 | N   |
| ATOM | 1114 | CA  | LYS | C | 145 | -13.096 | 4.350  | -30.815 | 1.00 | 46.29 | C   |
| ATOM | 1115 | C   | LYS | C | 145 | -11.907 | 5.298  | -30.710 | 1.00 | 47.37 | C   |
| ATOM | 1116 | O   | LYS | C | 145 | -11.037 | 5.342  | -31.629 | 1.00 | 48.18 | O   |
| ATOM | 1117 | CB  | LYS | C | 145 | -14.380 | 5.121  | -31.099 | 1.00 | 42.71 | C   |
| ATOM | 1118 | CG  | LYS | C | 145 | -14.461 | 5.708  | -32.494 | 1.00 | 42.42 | C   |
| ATOM | 1119 | CD  | LYS | C | 145 | -15.691 | 6.564  | -32.645 | 1.00 | 42.95 | C   |
| ATOM | 1120 | CE  | LYS | C | 145 | -15.799 | 7.218  | -34.003 | 1.00 | 42.57 | C   |
| ATOM | 1121 | NZ  | LYS | C | 145 | -16.949 | 8.146  | -33.979 | 1.00 | 46.80 | N1+ |
| ATOM | 1122 | N   | CYS | C | 146 | -11.839 | 5.991  | -29.568 | 1.00 | 50.46 | N   |
| ATOM | 1123 | CA  | CYS | C | 146 | -10.686 | 6.855  | -29.261 | 1.00 | 55.16 | C   |
| ATOM | 1124 | C   | CYS | C | 146 | -10.122 | 6.534  | -27.872 | 1.00 | 50.25 | C   |
| ATOM | 1125 | O   | CYS | C | 146 | -10.884 | 6.173  | -26.962 | 1.00 | 49.41 | O   |
| ATOM | 1126 | CB  | CYS | C | 146 | -11.068 | 8.330  | -29.351 | 1.00 | 52.46 | C   |
| ATOM | 1127 | SG  | CYS | C | 146 | -11.867 | 8.797  | -30.913 | 1.00 | 49.87 | S   |
| ATOM | 1128 | N   | LEU | C | 147 | -8.797  | 6.697  | -27.737 | 1.00 | 48.94 | N   |



|      |      |     |     |   |     |        |        |         |      |       |   |
|------|------|-----|-----|---|-----|--------|--------|---------|------|-------|---|
| ATOM | 1129 | CA  | LEU | C | 147 | -8.073 | 6.748  | -26.448 | 1.00 | 52.24 | C |
| ATOM | 1130 | C   | LEU | C | 147 | -7.520 | 8.166  | -26.240 | 1.00 | 57.45 | C |
| ATOM | 1131 | O   | LEU | C | 147 | -6.867 | 8.689  | -27.145 | 1.00 | 52.43 | O |
| ATOM | 1132 | CB  | LEU | C | 147 | -6.909 | 5.754  | -26.471 | 1.00 | 52.06 | C |
| ATOM | 1133 | CG  | LEU | C | 147 | -5.852 | 5.968  | -25.391 | 1.00 | 50.93 | C |
| ATOM | 1134 | CD1 | LEU | C | 147 | -6.414 | 5.626  | -24.029 | 1.00 | 53.32 | C |
| ATOM | 1135 | CD2 | LEU | C | 147 | -4.612 | 5.140  | -25.658 | 1.00 | 55.58 | C |
| ATOM | 1136 | N   | PHE | C | 148 | -7.728 | 8.738  | -25.038 | 1.00 | 61.42 | N |
| ATOM | 1137 | CA  | PHE | C | 148 | -7.267 | 10.103 | -24.689 | 1.00 | 57.89 | C |
| ATOM | 1138 | C   | PHE | C | 148 | -6.180 | 10.048 | -23.611 | 1.00 | 51.38 | C |
| ATOM | 1139 | O   | PHE | C | 148 | -6.304 | 9.334  | -22.653 | 1.00 | 58.97 | O |
| ATOM | 1140 | CB  | PHE | C | 148 | -8.439 | 10.981 | -24.249 | 1.00 | 60.46 | C |
| ATOM | 1141 | CG  | PHE | C | 148 | -8.039 | 12.405 | -23.962 | 1.00 | 64.32 | C |
| ATOM | 1142 | CD1 | PHE | C | 148 | -7.911 | 13.322 | -24.991 | 1.00 | 68.52 | C |
| ATOM | 1143 | CD2 | PHE | C | 148 | -7.767 | 12.822 | -22.671 | 1.00 | 67.79 | C |
| ATOM | 1144 | CE1 | PHE | C | 148 | -7.528 | 14.629 | -24.735 | 1.00 | 68.21 | C |
| ATOM | 1145 | CE2 | PHE | C | 148 | -7.394 | 14.131 | -22.415 | 1.00 | 73.47 | C |
| ATOM | 1146 | CZ  | PHE | C | 148 | -7.274 | 15.033 | -23.446 | 1.00 | 69.56 | C |
| ATOM | 1147 | N   | VAL | C | 149 | -5.109 | 10.824 | -23.799 | 1.00 | 56.75 | N |
| ATOM | 1148 | CA  | VAL | C | 149 | -3.910 | 10.800 | -22.943 | 1.00 | 53.52 | C |
| ATOM | 1149 | C   | VAL | C | 149 | -3.398 | 12.236 | -22.722 | 1.00 | 55.83 | C |
| ATOM | 1150 | O   | VAL | C | 149 | -3.118 | 12.946 | -23.684 | 1.00 | 57.63 | O |
| ATOM | 1151 | CB  | VAL | C | 149 | -2.801 | 9.942  | -23.578 | 1.00 | 55.71 | C |
| ATOM | 1152 | CG1 | VAL | C | 149 | -1.550 | 9.905  | -22.721 | 1.00 | 57.64 | C |
| ATOM | 1153 | CG2 | VAL | C | 149 | -3.269 | 8.527  | -23.864 | 1.00 | 66.22 | C |
| ATOM | 1154 | N   | VAL | C | 150 | -3.229 | 12.632 | -21.452 | 1.00 | 50.75 | N |
| ATOM | 1155 | CA  | VAL | C | 150 | -2.430 | 13.794 | -21.074 | 1.00 | 48.97 | C |
| ATOM | 1156 | C   | VAL | C | 150 | -0.935 | 13.449 | -21.240 | 1.00 | 43.97 | C |
| ATOM | 1157 | O   | VAL | C | 150 | -0.527 | 12.470 | -20.726 | 1.00 | 44.91 | O |
| ATOM | 1158 | CB  | VAL | C | 150 | -2.757 | 14.223 | -19.628 | 1.00 | 46.08 | C |
| ATOM | 1159 | CG1 | VAL | C | 150 | -1.828 | 15.321 | -19.135 | 1.00 | 49.11 | C |
| ATOM | 1160 | CG2 | VAL | C | 150 | -4.195 | 14.674 | -19.485 | 1.00 | 44.89 | C |
| ATOM | 1161 | N   | HIS | C | 151 | -0.149 | 14.272 | -21.957 | 1.00 | 43.65 | N |

|      |      |     |     |   |     |        |        |         |      |       |     |
|------|------|-----|-----|---|-----|--------|--------|---------|------|-------|-----|
| ATOM | 1162 | CA  | HIS | C | 151 | 1.291  | 14.016 | -22.190 | 1.00 | 46.19 | C   |
| ATOM | 1163 | C   | HIS | C | 151 | 2.085  | 14.583 | -21.021 | 1.00 | 48.59 | C   |
| ATOM | 1164 | O   | HIS | C | 151 | 2.774  | 13.851 | -20.329 | 1.00 | 51.33 | O   |
| ATOM | 1165 | CB  | HIS | C | 151 | 1.819  | 14.600 | -23.522 | 1.00 | 43.58 | C   |
| ATOM | 1166 | CG  | HIS | C | 151 | 3.246  | 14.265 | -23.845 | 1.00 | 44.11 | C   |
| ATOM | 1167 | CD2 | HIS | C | 151 | 4.055  | 13.255 | -23.440 | 1.00 | 46.99 | C   |
| ATOM | 1168 | ND1 | HIS | C | 151 | 4.015  | 15.018 | -24.720 | 1.00 | 49.26 | N   |
| ATOM | 1169 | CE1 | HIS | C | 151 | 5.227  | 14.484 | -24.832 | 1.00 | 45.02 | C   |
| ATOM | 1170 | NE2 | HIS | C | 151 | 5.281  | 13.410 | -24.049 | 1.00 | 43.28 | N   |
| ATOM | 1171 | N   | GLY | C | 152 | 1.984  | 15.904 | -20.841 | 1.00 | 46.69 | N   |
| ATOM | 1172 | CA  | GLY | C | 152 | 2.614  | 16.589 | -19.746 | 1.00 | 40.56 | C   |
| ATOM | 1173 | C   | GLY | C | 152 | 1.548  | 17.079 | -18.804 | 1.00 | 39.83 | C   |
| ATOM | 1174 | O   | GLY | C | 152 | 0.697  | 17.871 | -19.208 | 1.00 | 43.18 | O   |
| ATOM | 1175 | N   | ASP | C | 153 | 1.564  | 16.581 | -17.563 | 1.00 | 42.34 | N   |
| ATOM | 1176 | CA  | ASP | C | 153 | 0.488  | 16.882 | -16.592 | 1.00 | 45.03 | C   |
| ATOM | 1177 | C   | ASP | C | 153 | 0.945  | 18.026 | -15.680 | 1.00 | 43.06 | C   |
| ATOM | 1178 | O   | ASP | C | 153 | 1.904  | 17.898 | -14.930 | 1.00 | 45.52 | O   |
| ATOM | 1179 | CB  | ASP | C | 153 | 0.093  | 15.627 | -15.819 | 1.00 | 41.90 | C   |
| ATOM | 1180 | CG  | ASP | C | 153 | -1.182 | 15.758 | -15.021 | 1.00 | 43.85 | C   |
| ATOM | 1181 | OD1 | ASP | C | 153 | -1.454 | 16.862 | -14.532 | 1.00 | 50.99 | O   |
| ATOM | 1182 | OD2 | ASP | C | 153 | -1.896 | 14.744 | -14.895 | 1.00 | 54.15 | O1- |
| ATOM | 1183 | N   | SER | C | 154 | 0.248  | 19.155 | -15.765 | 1.00 | 45.26 | N   |
| ATOM | 1184 | CA  | SER | C | 154 | 0.678  | 20.377 | -15.086 | 1.00 | 44.91 | C   |
| ATOM | 1185 | C   | SER | C | 154 | 0.147  | 20.415 | -13.649 | 1.00 | 43.91 | C   |
| ATOM | 1186 | O   | SER | C | 154 | 0.420  | 21.371 | -12.909 | 1.00 | 45.38 | O   |
| ATOM | 1187 | CB  | SER | C | 154 | 0.277  | 21.615 | -15.882 | 1.00 | 46.35 | C   |
| ATOM | 1188 | OG  | SER | C | 154 | -1.116 | 21.657 | -16.196 | 1.00 | 37.62 | O   |
| ATOM | 1189 | N   | SER | C | 155 | -0.623 | 19.397 | -13.258 | 1.00 | 43.28 | N   |
| ATOM | 1190 | CA  | SER | C | 155 | -1.131 | 19.330 | -11.877 | 1.00 | 47.62 | C   |
| ATOM | 1191 | C   | SER | C | 155 | -0.214 | 18.454 | -11.013 | 1.00 | 44.75 | C   |
| ATOM | 1192 | O   | SER | C | 155 | -0.334 | 18.519 | -9.811  | 1.00 | 41.50 | O   |
| ATOM | 1193 | CB  | SER | C | 155 | -2.566 | 18.854 | -11.811 | 1.00 | 45.06 | C   |
| ATOM | 1194 | OG  | SER | C | 155 | -2.685 | 17.578 | -12.394 | 1.00 | 45.86 | O   |

|      |      |     |     |   |     |       |        |         |      |       |   |
|------|------|-----|-----|---|-----|-------|--------|---------|------|-------|---|
| ATOM | 1195 | N   | SER | C | 156 | 0.707 | 17.706 | -11.649 | 1.00 | 41.89 | N |
| ATOM | 1196 | CA  | SER | C | 156 | 1.441 | 16.604 | -11.034 | 1.00 | 40.66 | C |
| ATOM | 1197 | C   | SER | C | 156 | 2.955 | 16.627 | -11.328 | 1.00 | 43.86 | C |
| ATOM | 1198 | O   | SER | C | 156 | 3.730 | 16.106 | -10.539 | 1.00 | 42.81 | O |
| ATOM | 1199 | CB  | SER | C | 156 | 0.820 | 15.305 | -11.476 | 1.00 | 39.50 | C |
| ATOM | 1200 | OG  | SER | C | 156 | 1.184 | 14.967 | -12.810 | 1.00 | 38.71 | O |
| ATOM | 1201 | N   | GLY | C | 157 | 3.380 | 17.165 | -12.482 | 1.00 | 45.22 | N |
| ATOM | 1202 | CA  | GLY | C | 157 | 4.791 | 17.209 | -12.868 | 1.00 | 42.55 | C |
| ATOM | 1203 | C   | GLY | C | 157 | 5.251 | 15.958 | -13.595 | 1.00 | 43.58 | C |
| ATOM | 1204 | O   | GLY | C | 157 | 6.467 | 15.758 | -13.777 | 1.00 | 43.72 | O |
| ATOM | 1205 | N   | LEU | C | 158 | 4.277 | 15.175 | -14.088 | 1.00 | 44.83 | N |
| ATOM | 1206 | CA  | LEU | C | 158 | 4.468 | 13.835 | -14.685 | 1.00 | 47.89 | C |
| ATOM | 1207 | C   | LEU | C | 158 | 4.418 | 13.883 | -16.220 | 1.00 | 50.43 | C |
| ATOM | 1208 | O   | LEU | C | 158 | 3.412 | 14.328 | -16.786 | 1.00 | 45.87 | O |
| ATOM | 1209 | CB  | LEU | C | 158 | 3.348 | 12.910 | -14.188 | 1.00 | 48.69 | C |
| ATOM | 1210 | CG  | LEU | C | 158 | 3.423 | 11.460 | -14.670 | 1.00 | 47.65 | C |
| ATOM | 1211 | CD1 | LEU | C | 158 | 4.428 | 10.673 | -13.851 | 1.00 | 48.19 | C |
| ATOM | 1212 | CD2 | LEU | C | 158 | 2.055 | 10.789 | -14.623 | 1.00 | 51.81 | C |
| ATOM | 1213 | N   | LEU | C | 159 | 5.457 | 13.316 | -16.859 | 1.00 | 48.89 | N |
| ATOM | 1214 | CA  | LEU | C | 159 | 5.533 | 13.144 | -18.312 | 1.00 | 48.78 | C |
| ATOM | 1215 | C   | LEU | C | 159 | 5.340 | 11.666 | -18.689 | 1.00 | 50.87 | C |
| ATOM | 1216 | O   | LEU | C | 159 | 6.229 | 10.809 | -18.493 | 1.00 | 56.03 | O |
| ATOM | 1217 | CB  | LEU | C | 159 | 6.898 | 13.639 | -18.787 | 1.00 | 45.77 | C |
| ATOM | 1218 | CG  | LEU | C | 159 | 7.129 | 13.551 | -20.290 | 1.00 | 46.47 | C |
| ATOM | 1219 | CD1 | LEU | C | 159 | 6.305 | 14.603 | -21.022 | 1.00 | 48.19 | C |
| ATOM | 1220 | CD2 | LEU | C | 159 | 8.611 | 13.700 | -20.628 | 1.00 | 43.59 | C |
| ATOM | 1221 | N   | GLN | C | 160 | 4.192 | 11.393 | -19.295 | 1.00 | 46.93 | N |
| ATOM | 1222 | CA  | GLN | C | 160 | 3.797 | 10.080 | -19.799 | 1.00 | 48.28 | C |
| ATOM | 1223 | C   | GLN | C | 160 | 4.579 | 9.718  | -21.066 | 1.00 | 44.54 | C |
| ATOM | 1224 | O   | GLN | C | 160 | 4.457 | 10.448 | -22.037 | 1.00 | 46.52 | O |
| ATOM | 1225 | CB  | GLN | C | 160 | 2.296 | 10.137 | -20.095 | 1.00 | 46.83 | C |
| ATOM | 1226 | CG  | GLN | C | 160 | 1.753 | 8.896  | -20.772 | 1.00 | 50.82 | C |
| ATOM | 1227 | CD  | GLN | C | 160 | 2.021 | 7.668  | -19.941 | 1.00 | 50.19 | C |

|      |      |     |     |   |     |        |        |         |      |       |     |
|------|------|-----|-----|---|-----|--------|--------|---------|------|-------|-----|
| ATOM | 1228 | NE2 | GLN | C | 160 | 2.922  | 6.835  | -20.441 | 1.00 | 42.94 | N   |
| ATOM | 1229 | OE1 | GLN | C | 160 | 1.431  | 7.477  | -18.873 | 1.00 | 49.87 | O   |
| ATOM | 1230 | N   | PRO | C | 161 | 5.362  | 8.597  | -21.133 | 1.00 | 45.15 | N   |
| ATOM | 1231 | CA  | PRO | C | 161 | 5.918  | 8.097  | -22.400 | 1.00 | 47.57 | C   |
| ATOM | 1232 | C   | PRO | C | 161 | 4.839  | 7.637  | -23.389 | 1.00 | 45.49 | C   |
| ATOM | 1233 | O   | PRO | C | 161 | 3.863  | 7.054  | -22.976 | 1.00 | 47.69 | O   |
| ATOM | 1234 | CB  | PRO | C | 161 | 6.791  | 6.882  | -22.020 | 1.00 | 44.72 | C   |
| ATOM | 1235 | CG  | PRO | C | 161 | 7.072  | 7.097  | -20.553 | 1.00 | 44.76 | C   |
| ATOM | 1236 | CD  | PRO | C | 161 | 5.814  | 7.763  | -20.010 | 1.00 | 41.71 | C   |
| ATOM | 1237 | N   | LEU | C | 162 | 5.052  | 7.932  | -24.677 | 1.00 | 52.67 | N   |
| ATOM | 1238 | CA  | LEU | C | 162 | 4.094  | 7.705  | -25.773 | 1.00 | 50.61 | C   |
| ATOM | 1239 | C   | LEU | C | 162 | 4.640  | 6.726  | -26.827 | 1.00 | 51.31 | C   |
| ATOM | 1240 | O   | LEU | C | 162 | 3.868  | 6.266  | -27.659 | 1.00 | 56.37 | O   |
| ATOM | 1241 | CB  | LEU | C | 162 | 3.786  | 9.056  | -26.430 | 1.00 | 51.25 | C   |
| ATOM | 1242 | CG  | LEU | C | 162 | 3.133  | 10.103 | -25.529 | 1.00 | 55.98 | C   |
| ATOM | 1243 | CD1 | LEU | C | 162 | 3.142  | 11.466 | -26.207 | 1.00 | 59.71 | C   |
| ATOM | 1244 | CD2 | LEU | C | 162 | 1.708  | 9.709  | -25.144 | 1.00 | 56.44 | C   |
| ATOM | 1245 | N   | GLU | C | 163 | 5.946  | 6.420  | -26.829 | 1.00 | 49.99 | N   |
| ATOM | 1246 | CA  | GLU | C | 163 | 6.514  | 5.597  | -27.896 | 1.00 | 55.86 | C   |
| ATOM | 1247 | C   | GLU | C | 163 | 5.794  | 4.243  | -27.883 | 1.00 | 58.30 | C   |
| ATOM | 1248 | O   | GLU | C | 163 | 5.713  | 3.597  | -26.820 | 1.00 | 55.46 | O   |
| ATOM | 1249 | CB  | GLU | C | 163 | 8.026  | 5.400  | -27.752 | 1.00 | 64.43 | C   |
| ATOM | 1250 | CG  | GLU | C | 163 | 8.856  | 6.572  | -28.240 | 1.00 | 69.42 | C   |
| ATOM | 1251 | CD  | GLU | C | 163 | 10.086 | 6.153  | -29.023 | 1.00 | 75.30 | C   |
| ATOM | 1252 | OE1 | GLU | C | 163 | 9.995  | 6.114  | -30.262 | 1.00 | 82.89 | O   |
| ATOM | 1253 | OE2 | GLU | C | 163 | 11.121 | 5.846  | -28.392 | 1.00 | 77.71 | O1- |
| ATOM | 1254 | N   | GLY | C | 164 | 5.239  | 3.875  | -29.052 | 1.00 | 56.33 | N   |
| ATOM | 1255 | CA  | GLY | C | 164 | 4.560  | 2.626  | -29.287 | 1.00 | 51.12 | C   |
| ATOM | 1256 | C   | GLY | C | 164 | 3.047  | 2.734  | -29.221 | 1.00 | 50.29 | C   |
| ATOM | 1257 | O   | GLY | C | 164 | 2.372  | 2.127  | -30.013 | 1.00 | 63.64 | O   |
| ATOM | 1258 | N   | LEU | C | 165 | 2.516  | 3.501  | -28.263 | 1.00 | 52.59 | N   |
| ATOM | 1259 | CA  | LEU | C | 165 | 1.066  | 3.581  | -27.972 | 1.00 | 47.74 | C   |
| ATOM | 1260 | C   | LEU | C | 165 | 0.220  | 3.845  | -29.226 | 1.00 | 47.35 | C   |

|      |      |     |     |   |     |        |        |         |      |       |     |
|------|------|-----|-----|---|-----|--------|--------|---------|------|-------|-----|
| ATOM | 1261 | O   | LEU | C | 165 | -0.948 | 3.488  | -29.237 | 1.00 | 46.08 | O   |
| ATOM | 1262 | CB  | LEU | C | 165 | 0.841  | 4.680  | -26.931 | 1.00 | 46.38 | C   |
| ATOM | 1263 | CG  | LEU | C | 165 | -0.611 | 4.974  | -26.551 | 1.00 | 47.82 | C   |
| ATOM | 1264 | CD1 | LEU | C | 165 | -1.353 | 3.744  | -26.045 | 1.00 | 46.92 | C   |
| ATOM | 1265 | CD2 | LEU | C | 165 | -0.649 | 6.064  | -25.510 | 1.00 | 49.66 | C   |
| ATOM | 1266 | N   | GLY | C | 166 | 0.787  | 4.506  | -30.243 | 1.00 | 51.89 | N   |
| ATOM | 1267 | CA  | GLY | C | 166 | 0.098  | 4.762  | -31.504 | 1.00 | 56.77 | C   |
| ATOM | 1268 | C   | GLY | C | 166 | -0.098 | 3.498  | -32.328 | 1.00 | 59.18 | C   |
| ATOM | 1269 | O   | GLY | C | 166 | -1.195 | 3.227  | -32.833 | 1.00 | 59.10 | O   |
| ATOM | 1270 | N   | LYS | C | 167 | 0.988  | 2.741  | -32.494 | 1.00 | 66.57 | N   |
| ATOM | 1271 | CA  | LYS | C | 167 | 0.952  | 1.427  | -33.143 | 1.00 | 67.31 | C   |
| ATOM | 1272 | C   | LYS | C | 167 | -0.107 | 0.551  | -32.461 | 1.00 | 61.23 | C   |
| ATOM | 1273 | O   | LYS | C | 167 | -0.941 | -0.022 | -33.129 | 1.00 | 63.00 | O   |
| ATOM | 1274 | CB  | LYS | C | 167 | 2.331  | 0.762  | -33.079 | 1.00 | 68.23 | C   |
| ATOM | 1275 | CG  | LYS | C | 167 | 2.583  | -0.345 | -34.093 | 1.00 | 66.08 | C   |
| ATOM | 1276 | CD  | LYS | C | 167 | 4.058  | -0.718 | -34.232 | 1.00 | 67.08 | C   |
| ATOM | 1277 | CE  | LYS | C | 167 | 4.878  | 0.244  | -35.079 | 1.00 | 70.04 | C   |
| ATOM | 1278 | NZ  | LYS | C | 167 | 4.283  | 0.460  | -36.423 | 1.00 | 69.63 | N1+ |
| ATOM | 1279 | N   | ILE | C | 168 | -0.064 | 0.469  | -31.128 | 1.00 | 54.92 | N   |
| ATOM | 1280 | CA  | ILE | C | 168 | -0.951 | -0.418 | -30.363 | 1.00 | 59.09 | C   |
| ATOM | 1281 | C   | ILE | C | 168 | -2.403 | 0.016  | -30.592 | 1.00 | 63.61 | C   |
| ATOM | 1282 | O   | ILE | C | 168 | -3.286 | -0.822 | -30.726 | 1.00 | 68.77 | O   |
| ATOM | 1283 | CB  | ILE | C | 168 | -0.575 | -0.456 | -28.860 | 1.00 | 52.95 | C   |
| ATOM | 1284 | CG1 | ILE | C | 168 | 0.654  | -1.337 | -28.615 | 1.00 | 49.78 | C   |
| ATOM | 1285 | CG2 | ILE | C | 168 | -1.749 | -0.890 | -27.985 | 1.00 | 54.21 | C   |
| ATOM | 1286 | CD1 | ILE | C | 168 | 1.401  | -1.031 | -27.343 | 1.00 | 50.25 | C   |
| ATOM | 1287 | N   | CYS | C | 169 | -2.631 | 1.331  | -30.631 | 1.00 | 66.32 | N   |
| ATOM | 1288 | CA  | CYS | C | 169 | -3.959 | 1.892  | -30.857 | 1.00 | 62.70 | C   |
| ATOM | 1289 | C   | CYS | C | 169 | -4.493 | 1.486  | -32.243 | 1.00 | 57.55 | C   |
| ATOM | 1290 | O   | CYS | C | 169 | -5.646 | 1.052  | -32.384 | 1.00 | 46.52 | O   |
| ATOM | 1291 | CB  | CYS | C | 169 | -3.920 | 3.407  | -30.691 | 1.00 | 63.16 | C   |
| ATOM | 1292 | SG  | CYS | C | 169 | -4.071 | 3.917  | -28.959 | 1.00 | 58.51 | S   |
| ATOM | 1293 | N   | HIS | C | 170 | -3.651 | 1.642  | -33.267 | 1.00 | 56.28 | N   |

|      |      |     |     |   |     |         |        |         |      |       |     |
|------|------|-----|-----|---|-----|---------|--------|---------|------|-------|-----|
| ATOM | 1294 | CA  | HIS | C | 170 | -4.026  | 1.321  | -34.659 | 1.00 | 61.50 | C   |
| ATOM | 1295 | C   | HIS | C | 170 | -4.213  | -0.195 | -34.837 | 1.00 | 62.67 | C   |
| ATOM | 1296 | O   | HIS | C | 170 | -5.113  | -0.628 | -35.585 | 1.00 | 57.16 | O   |
| ATOM | 1297 | CB  | HIS | C | 170 | -3.009  | 1.915  | -35.641 | 1.00 | 57.68 | C   |
| ATOM | 1298 | CG  | HIS | C | 170 | -2.942  | 3.403  | -35.575 | 1.00 | 64.34 | C   |
| ATOM | 1299 | CD2 | HIS | C | 170 | -3.855  | 4.311  | -35.169 | 1.00 | 63.39 | C   |
| ATOM | 1300 | ND1 | HIS | C | 170 | -1.818  | 4.122  | -35.950 | 1.00 | 64.80 | N   |
| ATOM | 1301 | CE1 | HIS | C | 170 | -2.054  | 5.405  | -35.788 | 1.00 | 63.27 | C   |
| ATOM | 1302 | NE2 | HIS | C | 170 | -3.292  | 5.546  | -35.304 | 1.00 | 59.99 | N   |
| ATOM | 1303 | N   | ASP | C | 171 | -3.390  | -0.995 | -34.138 | 1.00 | 57.28 | N   |
| ATOM | 1304 | CA  | ASP | C | 171 | -3.567  | -2.459 | -34.098 | 1.00 | 54.80 | C   |
| ATOM | 1305 | C   | ASP | C | 171 | -5.029  | -2.762 | -33.697 | 1.00 | 53.48 | C   |
| ATOM | 1306 | O   | ASP | C | 171 | -5.691  | -3.555 | -34.377 | 1.00 | 57.59 | O   |
| ATOM | 1307 | CB  | ASP | C | 171 | -2.502  | -3.141 | -33.222 | 1.00 | 51.69 | C   |
| ATOM | 1308 | CG  | ASP | C | 171 | -1.083  | -3.224 | -33.798 | 1.00 | 52.01 | C   |
| ATOM | 1309 | OD1 | ASP | C | 171 | -0.901  | -2.996 | -35.007 | 1.00 | 54.81 | O   |
| ATOM | 1310 | OD2 | ASP | C | 171 | -0.141  | -3.490 | -33.014 | 1.00 | 54.84 | O1- |
| ATOM | 1311 | N   | TYR | C | 172 | -5.564  | -2.069 | -32.674 | 1.00 | 51.77 | N   |
| ATOM | 1312 | CA  | TYR | C | 172 | -6.960  | -2.301 | -32.161 | 1.00 | 51.21 | C   |
| ATOM | 1313 | C   | TYR | C | 172 | -7.997  | -1.345 | -32.791 | 1.00 | 50.56 | C   |
| ATOM | 1314 | O   | TYR | C | 172 | -9.103  | -1.186 | -32.246 | 1.00 | 39.92 | O   |
| ATOM | 1315 | CB  | TYR | C | 172 | -6.966  | -2.256 | -30.628 | 1.00 | 53.18 | C   |
| ATOM | 1316 | CG  | TYR | C | 172 | -6.313  | -3.454 | -29.977 | 1.00 | 56.95 | C   |
| ATOM | 1317 | CD1 | TYR | C | 172 | -4.940  | -3.498 | -29.745 | 1.00 | 55.76 | C   |
| ATOM | 1318 | CD2 | TYR | C | 172 | -7.063  | -4.570 | -29.625 | 1.00 | 56.05 | C   |
| ATOM | 1319 | CE1 | TYR | C | 172 | -4.333  | -4.619 | -29.199 | 1.00 | 59.22 | C   |
| ATOM | 1320 | CE2 | TYR | C | 172 | -6.474  | -5.696 | -29.069 | 1.00 | 58.71 | C   |
| ATOM | 1321 | CZ  | TYR | C | 172 | -5.103  | -5.727 | -28.859 | 1.00 | 64.60 | C   |
| ATOM | 1322 | OH  | TYR | C | 172 | -4.528  | -6.832 | -28.290 | 1.00 | 59.06 | O   |
| ATOM | 1323 | N   | ASP | C | 173 | -7.676  | -0.758 | -33.962 | 1.00 | 56.55 | N   |
| ATOM | 1324 | CA  | ASP | C | 173 | -8.590  | 0.151  | -34.724 | 1.00 | 61.52 | C   |
| ATOM | 1325 | C   | ASP | C | 173 | -8.988  | 1.389  | -33.899 | 1.00 | 59.42 | C   |
| ATOM | 1326 | O   | ASP | C | 173 | -10.126 | 1.791  | -33.893 | 1.00 | 55.39 | O   |

|      |      |     |     |   |     |         |        |         |      |       |     |
|------|------|-----|-----|---|-----|---------|--------|---------|------|-------|-----|
| ATOM | 1327 | CB  | ASP | C | 173 | -9.861  | -0.584 | -35.163 | 1.00 | 63.52 | C   |
| ATOM | 1328 | CG  | ASP | C | 173 | -9.798  | -1.194 | -36.551 | 1.00 | 67.76 | C   |
| ATOM | 1329 | OD1 | ASP | C | 173 | -8.676  | -1.346 | -37.097 | 1.00 | 65.90 | O   |
| ATOM | 1330 | OD2 | ASP | C | 173 | -10.883 | -1.527 | -37.072 | 1.00 | 75.76 | O1- |
| ATOM | 1331 | N   | CYS | C | 174 | -8.029  | 2.015  | -33.221 | 1.00 | 64.67 | N   |
| ATOM | 1332 | CA  | CYS | C | 174 | -8.345  | 3.040  | -32.212 | 1.00 | 61.78 | C   |
| ATOM | 1333 | C   | CYS | C | 174 | -7.623  | 4.340  | -32.576 | 1.00 | 54.33 | C   |
| ATOM | 1334 | O   | CYS | C | 174 | -6.480  | 4.276  | -33.063 | 1.00 | 46.48 | O   |
| ATOM | 1335 | CB  | CYS | C | 174 | -7.940  | 2.559  | -30.822 | 1.00 | 59.71 | C   |
| ATOM | 1336 | SG  | CYS | C | 174 | -8.367  | 3.714  | -29.496 | 1.00 | 56.91 | S   |
| ATOM | 1337 | N   | LEU | C | 175 | -8.298  | 5.493  | -32.376 | 1.00 | 48.97 | N   |
| ATOM | 1338 | CA  | LEU | C | 175 | -7.663  | 6.834  | -32.616 | 1.00 | 47.46 | C   |
| ATOM | 1339 | C   | LEU | C | 175 | -6.930  | 7.255  | -31.343 | 1.00 | 46.39 | C   |
| ATOM | 1340 | O   | LEU | C | 175 | -7.517  | 7.110  | -30.214 | 1.00 | 45.26 | O   |
| ATOM | 1341 | CB  | LEU | C | 175 | -8.722  | 7.873  | -33.009 | 1.00 | 47.23 | C   |
| ATOM | 1342 | CG  | LEU | C | 175 | -9.361  | 7.713  | -34.395 | 1.00 | 48.86 | C   |
| ATOM | 1343 | CD1 | LEU | C | 175 | -10.282 | 8.881  | -34.688 | 1.00 | 53.72 | C   |
| ATOM | 1344 | CD2 | LEU | C | 175 | -8.327  | 7.582  | -35.508 | 1.00 | 46.54 | C   |
| ATOM | 1345 | N   | LEU | C | 176 | -5.675  | 7.728  | -31.497 | 1.00 | 39.87 | N   |
| ATOM | 1346 | CA  | LEU | C | 176 | -4.866  | 8.207  | -30.323 | 1.00 | 43.62 | C   |
| ATOM | 1347 | C   | LEU | C | 176 | -4.872  | 9.746  | -30.246 | 1.00 | 46.85 | C   |
| ATOM | 1348 | O   | LEU | C | 176 | -4.479  | 10.433 | -31.211 | 1.00 | 46.39 | O   |
| ATOM | 1349 | CB  | LEU | C | 176 | -3.438  | 7.668  | -30.426 | 1.00 | 43.59 | C   |
| ATOM | 1350 | CG  | LEU | C | 176 | -2.434  | 8.250  | -29.427 | 1.00 | 43.54 | C   |
| ATOM | 1351 | CD1 | LEU | C | 176 | -2.860  | 7.976  | -27.992 | 1.00 | 44.04 | C   |
| ATOM | 1352 | CD2 | LEU | C | 176 | -1.030  | 7.714  | -29.683 | 1.00 | 40.68 | C   |
| ATOM | 1353 | N   | LEU | C | 177 | -5.291  | 10.259 | -29.083 | 1.00 | 45.60 | N   |
| ATOM | 1354 | CA  | LEU | C | 177 | -5.483  | 11.694 | -28.782 | 1.00 | 45.22 | C   |
| ATOM | 1355 | C   | LEU | C | 177 | -4.579  | 12.121 | -27.618 | 1.00 | 48.05 | C   |
| ATOM | 1356 | O   | LEU | C | 177 | -4.575  | 11.466 | -26.563 | 1.00 | 45.67 | O   |
| ATOM | 1357 | CB  | LEU | C | 177 | -6.945  | 11.900 | -28.399 | 1.00 | 42.31 | C   |
| ATOM | 1358 | CG  | LEU | C | 177 | -7.947  | 11.393 | -29.439 | 1.00 | 45.34 | C   |
| ATOM | 1359 | CD1 | LEU | C | 177 | -9.388  | 11.780 | -29.070 | 1.00 | 39.03 | C   |

|      |      |     |     |   |     |        |        |         |      |       |     |
|------|------|-----|-----|---|-----|--------|--------|---------|------|-------|-----|
| ATOM | 1360 | CD2 | LEU | C | 177 | -7.573 | 11.899 | -30.830 | 1.00 | 46.44 | C   |
| ATOM | 1361 | N   | VAL | C | 178 | -3.852 | 13.234 | -27.795 | 1.00 | 43.64 | N   |
| ATOM | 1362 | CA  | VAL | C | 178 | -2.853 | 13.653 | -26.816 | 1.00 | 44.58 | C   |
| ATOM | 1363 | C   | VAL | C | 178 | -3.054 | 15.136 | -26.444 | 1.00 | 47.08 | C   |
| ATOM | 1364 | O   | VAL | C | 178 | -3.040 | 16.031 | -27.306 | 1.00 | 44.06 | O   |
| ATOM | 1365 | CB  | VAL | C | 178 | -1.424 | 13.403 | -27.341 | 1.00 | 46.11 | C   |
| ATOM | 1366 | CG1 | VAL | C | 178 | -0.366 | 13.836 | -26.335 | 1.00 | 46.02 | C   |
| ATOM | 1367 | CG2 | VAL | C | 178 | -1.197 | 11.959 | -27.770 | 1.00 | 47.03 | C   |
| ATOM | 1368 | N   | ASP | C | 179 | -3.211 | 15.394 | -25.138 | 1.00 | 49.56 | N   |
| ATOM | 1369 | CA  | ASP | C | 179 | -3.058 | 16.730 | -24.568 | 1.00 | 45.61 | C   |
| ATOM | 1370 | C   | ASP | C | 179 | -1.564 | 16.998 | -24.454 | 1.00 | 45.55 | C   |
| ATOM | 1371 | O   | ASP | C | 179 | -0.834 | 16.208 | -23.847 | 1.00 | 46.58 | O   |
| ATOM | 1372 | CB  | ASP | C | 179 | -3.702 | 16.892 | -23.192 | 1.00 | 42.56 | C   |
| ATOM | 1373 | CG  | ASP | C | 179 | -3.471 | 18.276 | -22.604 | 1.00 | 44.29 | C   |
| ATOM | 1374 | OD1 | ASP | C | 179 | -2.298 | 18.694 | -22.560 | 1.00 | 40.94 | O   |
| ATOM | 1375 | OD2 | ASP | C | 179 | -4.468 | 18.937 | -22.217 | 1.00 | 44.47 | O1- |
| ATOM | 1376 | N   | ALA | C | 180 | -1.119 | 18.078 | -25.097 | 1.00 | 42.86 | N   |
| ATOM | 1377 | CA  | ALA | C | 180 | 0.298  | 18.372 | -25.145 | 1.00 | 41.29 | C   |
| ATOM | 1378 | C   | ALA | C | 180 | 0.534  | 19.857 | -24.808 | 1.00 | 38.91 | C   |
| ATOM | 1379 | O   | ALA | C | 180 | 1.598  | 20.404 | -25.118 | 1.00 | 38.99 | O   |
| ATOM | 1380 | CB  | ALA | C | 180 | 0.864  | 17.958 | -26.482 | 1.00 | 36.65 | C   |
| ATOM | 1381 | N   | VAL | C | 181 | -0.408 | 20.438 | -24.057 | 1.00 | 34.77 | N   |
| ATOM | 1382 | CA  | VAL | C | 181 | -0.403 | 21.834 | -23.666 | 1.00 | 40.46 | C   |
| ATOM | 1383 | C   | VAL | C | 181 | 0.905  | 22.167 | -22.932 | 1.00 | 42.65 | C   |
| ATOM | 1384 | O   | VAL | C | 181 | 1.627  | 23.101 | -23.344 | 1.00 | 50.53 | O   |
| ATOM | 1385 | CB  | VAL | C | 181 | -1.631 | 22.165 | -22.798 | 1.00 | 42.15 | C   |
| ATOM | 1386 | CG1 | VAL | C | 181 | -1.499 | 23.528 | -22.144 | 1.00 | 43.91 | C   |
| ATOM | 1387 | CG2 | VAL | C | 181 | -2.932 | 22.070 | -23.575 | 1.00 | 38.24 | C   |
| ATOM | 1388 | N   | ALA | C | 182 | 1.219  | 21.377 | -21.893 | 1.00 | 43.41 | N   |
| ATOM | 1389 | CA  | ALA | C | 182 | 2.365  | 21.620 | -21.012 | 1.00 | 43.04 | C   |
| ATOM | 1390 | C   | ALA | C | 182 | 3.673  | 20.999 | -21.548 | 1.00 | 43.38 | C   |
| ATOM | 1391 | O   | ALA | C | 182 | 4.783  | 21.426 | -21.111 | 1.00 | 44.46 | O   |
| ATOM | 1392 | CB  | ALA | C | 182 | 2.049  | 21.129 | -19.620 | 1.00 | 43.10 | C   |



|      |      |     |     |   |     |        |        |         |      |       |   |
|------|------|-----|-----|---|-----|--------|--------|---------|------|-------|---|
| ATOM | 1393 | N   | SER | C | 183 | 3.584  | 20.049 | -22.494 | 1.00 | 42.41 | N |
| ATOM | 1394 | CA  | SER | C | 183 | 4.794  | 19.291 | -22.975 | 1.00 | 44.77 | C |
| ATOM | 1395 | C   | SER | C | 183 | 5.443  | 19.919 | -24.226 | 1.00 | 40.47 | C |
| ATOM | 1396 | O   | SER | C | 183 | 6.679  | 19.949 | -24.347 | 1.00 | 41.88 | O |
| ATOM | 1397 | CB  | SER | C | 183 | 4.493  | 17.813 | -23.186 | 1.00 | 47.01 | C |
| ATOM | 1398 | OG  | SER | C | 183 | 3.461  | 17.604 | -24.142 | 1.00 | 50.96 | O |
| ATOM | 1399 | N   | LEU | C | 184 | 4.653  | 20.402 | -25.184 | 1.00 | 38.46 | N |
| ATOM | 1400 | CA  | LEU | C | 184 | 5.258  | 20.760 | -26.467 | 1.00 | 40.82 | C |
| ATOM | 1401 | C   | LEU | C | 184 | 6.272  | 21.896 | -26.286 | 1.00 | 43.22 | C |
| ATOM | 1402 | O   | LEU | C | 184 | 5.948  | 22.915 | -25.659 | 1.00 | 51.10 | O |
| ATOM | 1403 | CB  | LEU | C | 184 | 4.186  | 21.179 | -27.461 | 1.00 | 39.75 | C |
| ATOM | 1404 | CG  | LEU | C | 184 | 4.604  | 21.004 | -28.909 | 1.00 | 40.71 | C |
| ATOM | 1405 | CD1 | LEU | C | 184 | 4.624  | 19.536 | -29.250 | 1.00 | 43.67 | C |
| ATOM | 1406 | CD2 | LEU | C | 184 | 3.661  | 21.742 | -29.844 | 1.00 | 43.72 | C |
| ATOM | 1407 | N   | CYS | C | 185 | 7.465  | 21.685 | -26.862 | 1.00 | 41.47 | N |
| ATOM | 1408 | CA  | CYS | C | 185 | 8.629  | 22.588 | -26.935 | 1.00 | 43.38 | C |
| ATOM | 1409 | C   | CYS | C | 185 | 9.458  | 22.530 | -25.646 | 1.00 | 43.30 | C |
| ATOM | 1410 | O   | CYS | C | 185 | 10.441 | 23.265 | -25.495 | 1.00 | 49.60 | O |
| ATOM | 1411 | CB  | CYS | C | 185 | 8.254  | 24.030 | -27.263 | 1.00 | 46.86 | C |
| ATOM | 1412 | SG  | CYS | C | 185 | 7.440  | 24.227 | -28.870 | 1.00 | 48.84 | S |
| ATOM | 1413 | N   | GLY | C | 186 | 9.068  | 21.647 | -24.720 | 1.00 | 49.12 | N |
| ATOM | 1414 | CA  | GLY | C | 186 | 9.864  | 21.343 | -23.524 | 1.00 | 49.56 | C |
| ATOM | 1415 | C   | GLY | C | 186 | 10.584 | 20.002 | -23.629 | 1.00 | 48.13 | C |
| ATOM | 1416 | O   | GLY | C | 186 | 11.650 | 19.821 | -23.017 | 1.00 | 43.21 | O |
| ATOM | 1417 | N   | VAL | C | 187 | 9.979  | 19.069 | -24.384 | 1.00 | 47.60 | N |
| ATOM | 1418 | CA  | VAL | C | 187 | 10.476 | 17.719 | -24.588 | 1.00 | 45.87 | C |
| ATOM | 1419 | C   | VAL | C | 187 | 10.356 | 17.345 | -26.058 | 1.00 | 46.27 | C |
| ATOM | 1420 | O   | VAL | C | 187 | 9.558  | 17.905 | -26.801 | 1.00 | 43.71 | O |
| ATOM | 1421 | CB  | VAL | C | 187 | 9.700  | 16.709 | -23.727 | 1.00 | 49.31 | C |
| ATOM | 1422 | CG1 | VAL | C | 187 | 9.862  | 17.010 | -22.245 | 1.00 | 53.73 | C |
| ATOM | 1423 | CG2 | VAL | C | 187 | 8.230  | 16.640 | -24.099 | 1.00 | 47.77 | C |
| ATOM | 1424 | N   | PRO | C | 188 | 11.123 | 16.332 | -26.515 | 1.00 | 50.90 | N |
| ATOM | 1425 | CA  | PRO | C | 188 | 10.905 | 15.768 | -27.842 | 1.00 | 45.82 | C |

|      |      |     |     |       |        |        |         |      |       |   |
|------|------|-----|-----|-------|--------|--------|---------|------|-------|---|
| ATOM | 1426 | C   | PRO | C 188 | 9.422  | 15.440 | -28.040 | 1.00 | 44.58 | C |
| ATOM | 1427 | O   | PRO | C 188 | 8.770  | 15.000 | -27.113 | 1.00 | 46.53 | O |
| ATOM | 1428 | CB  | PRO | C 188 | 11.780 | 14.515 | -27.815 | 1.00 | 45.18 | C |
| ATOM | 1429 | CG  | PRO | C 188 | 12.921 | 14.905 | -26.900 | 1.00 | 44.14 | C |
| ATOM | 1430 | CD  | PRO | C 188 | 12.231 | 15.673 | -25.791 | 1.00 | 45.23 | C |
| ATOM | 1431 | N   | PHE | C 189 | 8.906  | 15.736 | -29.235 | 1.00 | 48.76 | N |
| ATOM | 1432 | CA  | PHE | C 189 | 7.585  | 15.291 | -29.676 | 1.00 | 47.88 | C |
| ATOM | 1433 | C   | PHE | C 189 | 7.586  | 15.082 | -31.189 | 1.00 | 51.62 | C |
| ATOM | 1434 | O   | PHE | C 189 | 8.162  | 15.886 | -31.936 | 1.00 | 51.57 | O |
| ATOM | 1435 | CB  | PHE | C 189 | 6.540  | 16.325 | -29.303 | 1.00 | 42.26 | C |
| ATOM | 1436 | CG  | PHE | C 189 | 5.121  | 15.885 | -29.500 | 1.00 | 41.28 | C |
| ATOM | 1437 | CD1 | PHE | C 189 | 4.487  | 16.080 | -30.712 | 1.00 | 40.37 | C |
| ATOM | 1438 | CD2 | PHE | C 189 | 4.389  | 15.371 | -28.441 | 1.00 | 42.55 | C |
| ATOM | 1439 | CE1 | PHE | C 189 | 3.151  | 15.756 | -30.860 | 1.00 | 39.44 | C |
| ATOM | 1440 | CE2 | PHE | C 189 | 3.056  | 15.024 | -28.593 | 1.00 | 38.99 | C |
| ATOM | 1441 | CZ  | PHE | C 189 | 2.443  | 15.214 | -29.803 | 1.00 | 40.45 | C |
| ATOM | 1442 | N   | TYR | C 190 | 6.967  | 13.979 | -31.618 | 1.00 | 53.02 | N |
| ATOM | 1443 | CA  | TYR | C 190 | 6.974  | 13.542 | -33.016 | 1.00 | 50.02 | C |
| ATOM | 1444 | C   | TYR | C 190 | 5.563  | 13.063 | -33.374 | 1.00 | 48.74 | C |
| ATOM | 1445 | O   | TYR | C 190 | 5.277  | 11.879 | -33.316 | 1.00 | 55.15 | O |
| ATOM | 1446 | CB  | TYR | C 190 | 8.011  | 12.436 | -33.256 | 1.00 | 47.32 | C |
| ATOM | 1447 | CG  | TYR | C 190 | 9.444  | 12.742 | -32.878 | 1.00 | 44.13 | C |
| ATOM | 1448 | CD1 | TYR | C 190 | 9.882  | 12.603 | -31.565 | 1.00 | 44.34 | C |
| ATOM | 1449 | CD2 | TYR | C 190 | 10.382 | 13.113 | -33.831 | 1.00 | 40.46 | C |
| ATOM | 1450 | CE1 | TYR | C 190 | 11.197 | 12.869 | -31.206 | 1.00 | 45.11 | C |
| ATOM | 1451 | CE2 | TYR | C 190 | 11.703 | 13.379 | -33.492 | 1.00 | 43.61 | C |
| ATOM | 1452 | CZ  | TYR | C 190 | 12.117 | 13.245 | -32.173 | 1.00 | 45.93 | C |
| ATOM | 1453 | OH  | TYR | C 190 | 13.417 | 13.473 | -31.814 | 1.00 | 44.87 | O |
| ATOM | 1454 | N   | MET | C 191 | 4.673  | 13.992 | -33.730 | 1.00 | 44.03 | N |
| ATOM | 1455 | CA  | MET | C 191 | 3.281  | 13.626 | -33.898 | 1.00 | 45.10 | C |
| ATOM | 1456 | C   | MET | C 191 | 3.147  | 12.444 | -34.866 | 1.00 | 44.35 | C |
| ATOM | 1457 | O   | MET | C 191 | 2.465  | 11.475 | -34.550 | 1.00 | 44.48 | O |
| ATOM | 1458 | CB  | MET | C 191 | 2.407  | 14.769 | -34.411 | 1.00 | 43.22 | C |

|      |      |     |     |   |     |        |        |         |      |       |     |
|------|------|-----|-----|---|-----|--------|--------|---------|------|-------|-----|
| ATOM | 1459 | CG  | MET | C | 191 | 0.919  | 14.470 | -34.293 | 1.00 | 42.32 | C   |
| ATOM | 1460 | SD  | MET | C | 191 | -0.012 | 15.592 | -35.339 | 1.00 | 42.01 | S   |
| ATOM | 1461 | CE  | MET | C | 191 | -1.707 | 15.127 | -34.977 | 1.00 | 37.45 | C   |
| ATOM | 1462 | N   | ASP | C | 192 | 3.803  | 12.533 | -36.022 | 1.00 | 49.71 | N   |
| ATOM | 1463 | CA  | ASP | C | 192 | 3.613  | 11.559 | -37.121 | 1.00 | 48.52 | C   |
| ATOM | 1464 | C   | ASP | C | 192 | 4.238  | 10.206 | -36.742 | 1.00 | 44.08 | C   |
| ATOM | 1465 | O   | ASP | C | 192 | 3.521  | 9.211  | -36.697 | 1.00 | 42.42 | O   |
| ATOM | 1466 | CB  | ASP | C | 192 | 4.073  | 12.161 | -38.450 | 1.00 | 46.38 | C   |
| ATOM | 1467 | CG  | ASP | C | 192 | 2.982  | 13.015 | -39.097 | 1.00 | 50.48 | C   |
| ATOM | 1468 | OD1 | ASP | C | 192 | 1.859  | 13.107 | -38.520 | 1.00 | 48.38 | O   |
| ATOM | 1469 | OD2 | ASP | C | 192 | 3.242  | 13.566 | -40.180 | 1.00 | 51.77 | O1- |
| ATOM | 1470 | N   | LYS | C | 193 | 5.525  | 10.211 | -36.382 | 1.00 | 43.39 | N   |
| ATOM | 1471 | CA  | LYS | C | 193 | 6.305  | 9.016  | -36.052 | 1.00 | 44.65 | C   |
| ATOM | 1472 | C   | LYS | C | 193 | 5.795  | 8.330  | -34.777 | 1.00 | 45.32 | C   |
| ATOM | 1473 | O   | LYS | C | 193 | 5.993  | 7.141  | -34.649 | 1.00 | 44.47 | O   |
| ATOM | 1474 | CB  | LYS | C | 193 | 7.795  | 9.360  | -35.954 | 1.00 | 47.06 | C   |
| ATOM | 1475 | CG  | LYS | C | 193 | 8.371  | 9.898  | -37.262 | 1.00 | 51.80 | C   |
| ATOM | 1476 | CD  | LYS | C | 193 | 9.861  | 9.790  | -37.400 | 1.00 | 53.65 | C   |
| ATOM | 1477 | CE  | LYS | C | 193 | 10.349 | 10.364 | -38.711 | 1.00 | 61.54 | C   |
| ATOM | 1478 | NZ  | LYS | C | 193 | 11.599 | 11.149 | -38.537 | 1.00 | 66.96 | N1+ |
| ATOM | 1479 | N   | TRP | C | 194 | 5.090  | 9.043  | -33.885 | 1.00 | 44.33 | N   |
| ATOM | 1480 | CA  | TRP | C | 194 | 4.408  | 8.390  | -32.757 | 1.00 | 44.02 | C   |
| ATOM | 1481 | C   | TRP | C | 194 | 2.945  | 8.066  | -33.100 | 1.00 | 47.14 | C   |
| ATOM | 1482 | O   | TRP | C | 194 | 2.112  | 7.829  | -32.212 | 1.00 | 44.36 | O   |
| ATOM | 1483 | CB  | TRP | C | 194 | 4.517  | 9.230  | -31.491 | 1.00 | 43.64 | C   |
| ATOM | 1484 | CG  | TRP | C | 194 | 5.919  | 9.405  | -30.990 | 1.00 | 47.39 | C   |
| ATOM | 1485 | CD1 | TRP | C | 194 | 7.041  | 8.750  | -31.406 | 1.00 | 49.03 | C   |
| ATOM | 1486 | CD2 | TRP | C | 194 | 6.347  | 10.309 | -29.952 | 1.00 | 49.45 | C   |
| ATOM | 1487 | CE2 | TRP | C | 194 | 7.744  | 10.139 | -29.803 | 1.00 | 52.45 | C   |
| ATOM | 1488 | CE3 | TRP | C | 194 | 5.694  | 11.252 | -29.148 | 1.00 | 49.00 | C   |
| ATOM | 1489 | NE1 | TRP | C | 194 | 8.140  | 9.187  | -30.708 | 1.00 | 53.43 | N   |
| ATOM | 1490 | CZ2 | TRP | C | 194 | 8.487  | 10.867 | -28.872 | 1.00 | 48.95 | C   |
| ATOM | 1491 | CZ3 | TRP | C | 194 | 6.433  | 11.981 | -28.235 | 1.00 | 50.75 | C   |

|      |      |     |     |   |     |        |        |         |      |       |     |
|------|------|-----|-----|---|-----|--------|--------|---------|------|-------|-----|
| ATOM | 1492 | CH2 | TRP | C | 194 | 7.814  | 11.800 | -28.110 | 1.00 | 47.48 | C   |
| ATOM | 1493 | N   | GLU | C | 195 | 2.641  | 8.006  | -34.400 | 1.00 | 50.64 | N   |
| ATOM | 1494 | CA  | GLU | C | 195 | 1.323  | 7.643  | -34.906 | 1.00 | 50.76 | C   |
| ATOM | 1495 | C   | GLU | C | 195 | 0.237  | 8.204  | -33.985 | 1.00 | 46.71 | C   |
| ATOM | 1496 | O   | GLU | C | 195 | -0.536 | 7.457  | -33.401 | 1.00 | 52.92 | O   |
| ATOM | 1497 | CB  | GLU | C | 195 | 1.253  | 6.120  | -35.040 | 1.00 | 53.95 | C   |
| ATOM | 1498 | CG  | GLU | C | 195 | 2.130  | 5.557  | -36.154 | 1.00 | 54.74 | C   |
| ATOM | 1499 | CD  | GLU | C | 195 | 2.061  | 4.040  | -36.271 | 1.00 | 61.14 | C   |
| ATOM | 1500 | OE1 | GLU | C | 195 | 0.936  | 3.521  | -36.434 | 1.00 | 58.70 | O   |
| ATOM | 1501 | OE2 | GLU | C | 195 | 3.123  | 3.374  | -36.167 | 1.00 | 64.15 | O1- |
| ATOM | 1502 | N   | ILE | C | 196 | 0.198  | 9.536  | -33.873 | 1.00 | 45.21 | N   |
| ATOM | 1503 | CA  | ILE | C | 196 | -0.810 | 10.250 | -33.108 | 1.00 | 46.97 | C   |
| ATOM | 1504 | C   | ILE | C | 196 | -1.822 | 10.829 | -34.110 | 1.00 | 49.12 | C   |
| ATOM | 1505 | O   | ILE | C | 196 | -1.399 | 11.304 | -35.187 | 1.00 | 44.40 | O   |
| ATOM | 1506 | CB  | ILE | C | 196 | -0.158 | 11.340 | -32.225 | 1.00 | 47.54 | C   |
| ATOM | 1507 | CG1 | ILE | C | 196 | 0.717  | 10.723 | -31.138 | 1.00 | 46.10 | C   |
| ATOM | 1508 | CG2 | ILE | C | 196 | -1.194 | 12.280 | -31.612 | 1.00 | 49.93 | C   |
| ATOM | 1509 | CD1 | ILE | C | 196 | 1.656  | 11.702 | -30.490 | 1.00 | 45.89 | C   |
| ATOM | 1510 | N   | ASP | C | 197 | -3.117 | 10.835 | -33.723 | 1.00 | 46.66 | N   |
| ATOM | 1511 | CA  | ASP | C | 197 | -4.244 | 11.197 | -34.615 | 1.00 | 52.30 | C   |
| ATOM | 1512 | C   | ASP | C | 197 | -4.837 | 12.572 | -34.285 | 1.00 | 62.14 | C   |
| ATOM | 1513 | O   | ASP | C | 197 | -5.486 | 13.177 | -35.147 | 1.00 | 65.06 | O   |
| ATOM | 1514 | CB  | ASP | C | 197 | -5.352 | 10.139 | -34.568 | 1.00 | 49.64 | C   |
| ATOM | 1515 | CG  | ASP | C | 197 | -4.893 | 8.826  | -35.182 | 1.00 | 48.85 | C   |
| ATOM | 1516 | OD1 | ASP | C | 197 | -4.363 | 8.873  | -36.332 | 1.00 | 40.27 | O   |
| ATOM | 1517 | OD2 | ASP | C | 197 | -4.997 | 7.782  | -34.477 | 1.00 | 46.22 | O1- |
| ATOM | 1518 | N   | GLY | C | 198 | -4.638 | 13.044 | -33.047 | 1.00 | 64.88 | N   |
| ATOM | 1519 | CA  | GLY | C | 198 | -5.258 | 14.261 | -32.547 | 1.00 | 62.27 | C   |
| ATOM | 1520 | C   | GLY | C | 198 | -4.455 | 14.859 | -31.411 | 1.00 | 57.00 | C   |
| ATOM | 1521 | O   | GLY | C | 198 | -4.092 | 14.150 | -30.452 | 1.00 | 51.35 | O   |
| ATOM | 1522 | N   | VAL | C | 199 | -4.186 | 16.163 | -31.532 | 1.00 | 52.30 | N   |
| ATOM | 1523 | CA  | VAL | C | 199 | -3.326 | 16.861 | -30.608 | 1.00 | 51.34 | C   |
| ATOM | 1524 | C   | VAL | C | 199 | -3.630 | 18.371 | -30.605 | 1.00 | 52.84 | C   |

|      |      |     |     |   |     |        |        |         |      |       |   |
|------|------|-----|-----|---|-----|--------|--------|---------|------|-------|---|
| ATOM | 1525 | O   | VAL | C | 199 | -4.068 | 18.961 | -31.599 | 1.00 | 52.50 | O |
| ATOM | 1526 | CB  | VAL | C | 199 | -1.862 | 16.579 | -30.972 | 1.00 | 52.97 | C |
| ATOM | 1527 | CG1 | VAL | C | 199 | -1.487 | 17.224 | -32.297 | 1.00 | 52.22 | C |
| ATOM | 1528 | CG2 | VAL | C | 199 | -0.917 | 17.002 | -29.854 | 1.00 | 54.11 | C |
| ATOM | 1529 | N   | TYR | C | 200 | -3.394 | 18.995 | -29.449 | 1.00 | 49.67 | N |
| ATOM | 1530 | CA  | TYR | C | 200 | -3.509 | 20.436 | -29.281 | 1.00 | 44.53 | C |
| ATOM | 1531 | C   | TYR | C | 200 | -2.404 | 20.872 | -28.311 | 1.00 | 43.24 | C |
| ATOM | 1532 | O   | TYR | C | 200 | -1.856 | 20.018 | -27.609 | 1.00 | 42.41 | O |
| ATOM | 1533 | CB  | TYR | C | 200 | -4.926 | 20.801 | -28.823 | 1.00 | 42.23 | C |
| ATOM | 1534 | CG  | TYR | C | 200 | -5.348 | 20.192 | -27.505 | 1.00 | 47.60 | C |
| ATOM | 1535 | CD1 | TYR | C | 200 | -5.656 | 18.840 | -27.386 | 1.00 | 46.95 | C |
| ATOM | 1536 | CD2 | TYR | C | 200 | -5.441 | 20.965 | -26.360 | 1.00 | 44.88 | C |
| ATOM | 1537 | CE1 | TYR | C | 200 | -6.032 | 18.274 | -26.172 | 1.00 | 44.59 | C |
| ATOM | 1538 | CE2 | TYR | C | 200 | -5.836 | 20.418 | -25.146 | 1.00 | 47.84 | C |
| ATOM | 1539 | CZ  | TYR | C | 200 | -6.124 | 19.065 | -25.038 | 1.00 | 46.69 | C |
| ATOM | 1540 | OH  | TYR | C | 200 | -6.481 | 18.541 | -23.823 | 1.00 | 40.41 | O |
| ATOM | 1541 | N   | THR | C | 201 | -2.062 | 22.171 | -28.321 | 1.00 | 40.37 | N |
| ATOM | 1542 | CA  | THR | C | 201 | -1.286 | 22.804 | -27.243 | 1.00 | 42.88 | C |
| ATOM | 1543 | C   | THR | C | 201 | -1.958 | 24.125 | -26.834 | 1.00 | 39.25 | C |
| ATOM | 1544 | O   | THR | C | 201 | -3.050 | 24.444 | -27.266 | 1.00 | 34.96 | O |
| ATOM | 1545 | CB  | THR | C | 201 | 0.197  | 22.968 | -27.614 | 1.00 | 46.92 | C |
| ATOM | 1546 | CG2 | THR | C | 201 | 0.403  | 23.884 | -28.805 | 1.00 | 44.37 | C |
| ATOM | 1547 | OG1 | THR | C | 201 | 0.903  | 23.473 | -26.470 | 1.00 | 47.58 | O |
| ATOM | 1548 | N   | GLY | C | 202 | -1.315 | 24.836 | -25.909 | 1.00 | 39.97 | N |
| ATOM | 1549 | CA  | GLY | C | 202 | -1.750 | 26.164 | -25.440 | 1.00 | 42.08 | C |
| ATOM | 1550 | C   | GLY | C | 202 | -0.716 | 27.237 | -25.763 | 1.00 | 41.98 | C |
| ATOM | 1551 | O   | GLY | C | 202 | 0.497  | 26.994 | -25.839 | 1.00 | 43.94 | O |
| ATOM | 1552 | N   | SER | C | 203 | -1.202 | 28.454 | -25.971 | 1.00 | 43.07 | N |
| ATOM | 1553 | CA  | SER | C | 203 | -0.326 | 29.567 | -26.319 | 1.00 | 38.85 | C |
| ATOM | 1554 | C   | SER | C | 203 | 0.513  | 29.964 | -25.108 | 1.00 | 35.18 | C |
| ATOM | 1555 | O   | SER | C | 203 | 1.696  | 30.187 | -25.274 | 1.00 | 41.19 | O |
| ATOM | 1556 | CB  | SER | C | 203 | -1.109 | 30.746 | -26.854 | 1.00 | 34.86 | C |
| ATOM | 1557 | OG  | SER | C | 203 | -2.258 | 30.967 | -26.055 | 1.00 | 32.64 | O |

|      |      |     |     |   |     |        |        |         |      |       |     |
|------|------|-----|-----|---|-----|--------|--------|---------|------|-------|-----|
| ATOM | 1558 | N   | GLN | C | 204 | -0.103 | 29.992 | -23.910 | 1.00 | 36.99 | N   |
| ATOM | 1559 | CA  | GLN | C | 204 | 0.469  | 30.630 | -22.713 | 1.00 | 36.49 | C   |
| ATOM | 1560 | C   | GLN | C | 204 | 1.366  | 29.676 | -21.909 | 1.00 | 36.22 | C   |
| ATOM | 1561 | O   | GLN | C | 204 | 1.774  | 30.012 | -20.798 | 1.00 | 38.58 | O   |
| ATOM | 1562 | CB  | GLN | C | 204 | -0.638 | 31.246 | -21.849 | 1.00 | 37.88 | C   |
| ATOM | 1563 | CG  | GLN | C | 204 | -1.367 | 30.284 | -20.923 | 1.00 | 39.26 | C   |
| ATOM | 1564 | CD  | GLN | C | 204 | -2.492 | 29.532 | -21.599 | 1.00 | 45.74 | C   |
| ATOM | 1565 | NE2 | GLN | C | 204 | -3.409 | 28.983 | -20.794 | 1.00 | 34.58 | N   |
| ATOM | 1566 | OE1 | GLN | C | 204 | -2.523 | 29.434 | -22.833 | 1.00 | 47.60 | O   |
| ATOM | 1567 | N   | LYS | C | 205 | 1.721  | 28.507 | -22.449 | 1.00 | 38.29 | N   |
| ATOM | 1568 | CA  | LYS | C | 205 | 2.556  | 27.571 | -21.684 | 1.00 | 37.16 | C   |
| ATOM | 1569 | C   | LYS | C | 205 | 3.978  | 27.715 | -22.240 | 1.00 | 40.95 | C   |
| ATOM | 1570 | O   | LYS | C | 205 | 4.560  | 28.834 | -22.177 | 1.00 | 43.89 | O   |
| ATOM | 1571 | CB  | LYS | C | 205 | 1.887  | 26.192 | -21.625 | 1.00 | 37.05 | C   |
| ATOM | 1572 | CG  | LYS | C | 205 | 0.464  | 26.195 | -21.052 | 1.00 | 38.93 | C   |
| ATOM | 1573 | CD  | LYS | C | 205 | 0.319  | 25.845 | -19.577 | 1.00 | 42.98 | C   |
| ATOM | 1574 | CE  | LYS | C | 205 | -0.935 | 26.404 | -18.920 | 1.00 | 46.32 | C   |
| ATOM | 1575 | NZ  | LYS | C | 205 | -1.980 | 25.383 | -18.670 | 1.00 | 50.33 | N1+ |
| ATOM | 1576 | N   | VAL | C | 206 | 4.562  | 26.659 | -22.812 | 1.00 | 40.77 | N   |
| ATOM | 1577 | CA  | VAL | C | 206 | 5.982  | 26.749 | -23.124 | 1.00 | 39.26 | C   |
| ATOM | 1578 | C   | VAL | C | 206 | 6.242  | 27.796 | -24.227 | 1.00 | 40.88 | C   |
| ATOM | 1579 | O   | VAL | C | 206 | 7.298  | 28.395 | -24.238 | 1.00 | 46.21 | O   |
| ATOM | 1580 | CB  | VAL | C | 206 | 6.566  | 25.373 | -23.470 | 1.00 | 43.30 | C   |
| ATOM | 1581 | CG1 | VAL | C | 206 | 8.063  | 25.451 | -23.699 | 1.00 | 43.03 | C   |
| ATOM | 1582 | CG2 | VAL | C | 206 | 6.241  | 24.335 | -22.409 | 1.00 | 47.85 | C   |
| ATOM | 1583 | N   | LEU | C | 207 | 5.304  | 28.016 | -25.159 | 1.00 | 42.42 | N   |
| ATOM | 1584 | CA  | LEU | C | 207 | 5.532  | 28.937 | -26.328 | 1.00 | 42.55 | C   |
| ATOM | 1585 | C   | LEU | C | 207 | 5.811  | 30.382 | -25.888 | 1.00 | 41.87 | C   |
| ATOM | 1586 | O   | LEU | C | 207 | 6.460  | 31.138 | -26.633 | 1.00 | 43.32 | O   |
| ATOM | 1587 | CB  | LEU | C | 207 | 4.325  | 28.908 | -27.284 | 1.00 | 44.33 | C   |
| ATOM | 1588 | CG  | LEU | C | 207 | 4.320  | 27.748 | -28.282 | 1.00 | 42.81 | C   |
| ATOM | 1589 | CD1 | LEU | C | 207 | 2.943  | 27.528 | -28.865 | 1.00 | 40.99 | C   |
| ATOM | 1590 | CD2 | LEU | C | 207 | 5.351  | 27.972 | -29.379 | 1.00 | 43.14 | C   |

|      |      |     |     |   |     |        |        |         |      |       |   |
|------|------|-----|-----|---|-----|--------|--------|---------|------|-------|---|
| ATOM | 1591 | N   | GLY | C | 208 | 5.301  | 30.775 | -24.714 | 1.00 | 40.18 | N |
| ATOM | 1592 | CA  | GLY | C | 208 | 5.475  | 32.128 | -24.205 | 1.00 | 37.64 | C |
| ATOM | 1593 | C   | GLY | C | 208 | 4.686  | 33.136 | -25.020 | 1.00 | 34.48 | C |
| ATOM | 1594 | O   | GLY | C | 208 | 5.266  | 34.068 | -25.475 | 1.00 | 29.39 | O |
| ATOM | 1595 | N   | ALA | C | 209 | 3.371  | 32.876 | -25.184 | 1.00 | 32.93 | N |
| ATOM | 1596 | CA  | ALA | C | 209 | 2.458  | 33.611 | -26.059 | 1.00 | 34.27 | C |
| ATOM | 1597 | C   | ALA | C | 209 | 1.152  | 33.908 | -25.331 | 1.00 | 34.03 | C |
| ATOM | 1598 | O   | ALA | C | 209 | 0.768  | 33.174 | -24.447 | 1.00 | 37.53 | O |
| ATOM | 1599 | CB  | ALA | C | 209 | 2.177  | 32.836 | -27.318 | 1.00 | 35.68 | C |
| ATOM | 1600 | N   | PRO | C | 210 | 0.443  | 35.013 | -25.642 | 1.00 | 36.06 | N |
| ATOM | 1601 | CA  | PRO | C | 210 | -0.743 | 35.384 | -24.876 | 1.00 | 38.79 | C |
| ATOM | 1602 | C   | PRO | C | 210 | -1.806 | 34.298 | -24.960 | 1.00 | 33.34 | C |
| ATOM | 1603 | O   | PRO | C | 210 | -1.927 | 33.637 | -25.971 | 1.00 | 36.61 | O |
| ATOM | 1604 | CB  | PRO | C | 210 | -1.232 | 36.691 | -25.522 | 1.00 | 39.52 | C |
| ATOM | 1605 | CG  | PRO | C | 210 | 0.020  | 37.214 | -26.220 | 1.00 | 41.08 | C |
| ATOM | 1606 | CD  | PRO | C | 210 | 0.754  | 35.980 | -26.703 | 1.00 | 37.68 | C |
| ATOM | 1607 | N   | PRO | C | 211 | -2.585 | 34.057 | -23.894 | 1.00 | 35.84 | N |
| ATOM | 1608 | CA  | PRO | C | 211 | -3.669 | 33.079 | -23.959 | 1.00 | 38.55 | C |
| ATOM | 1609 | C   | PRO | C | 211 | -4.774 | 33.531 | -24.923 | 1.00 | 36.60 | C |
| ATOM | 1610 | O   | PRO | C | 211 | -4.900 | 34.719 | -25.199 | 1.00 | 40.44 | O |
| ATOM | 1611 | CB  | PRO | C | 211 | -4.146 | 32.996 | -22.499 | 1.00 | 37.17 | C |
| ATOM | 1612 | CG  | PRO | C | 211 | -3.774 | 34.332 | -21.897 | 1.00 | 32.65 | C |
| ATOM | 1613 | CD  | PRO | C | 211 | -2.466 | 34.682 | -22.565 | 1.00 | 35.66 | C |
| ATOM | 1614 | N   | GLY | C | 212 | -5.498 | 32.563 | -25.478 | 1.00 | 35.45 | N |
| ATOM | 1615 | CA  | GLY | C | 212 | -6.726 | 32.850 | -26.210 | 1.00 | 37.04 | C |
| ATOM | 1616 | C   | GLY | C | 212 | -6.828 | 32.192 | -27.571 | 1.00 | 32.73 | C |
| ATOM | 1617 | O   | GLY | C | 212 | -7.851 | 32.338 | -28.235 | 1.00 | 35.32 | O |
| ATOM | 1618 | N   | ILE | C | 213 | -5.792 | 31.466 | -27.982 | 1.00 | 32.34 | N |
| ATOM | 1619 | CA  | ILE | C | 213 | -5.700 | 30.912 | -29.341 | 1.00 | 33.72 | C |
| ATOM | 1620 | C   | ILE | C | 213 | -4.971 | 29.560 | -29.243 | 1.00 | 33.63 | C |
| ATOM | 1621 | O   | ILE | C | 213 | -3.856 | 29.490 | -28.730 | 1.00 | 38.32 | O |
| ATOM | 1622 | CB  | ILE | C | 213 | -5.011 | 31.920 | -30.289 | 1.00 | 30.26 | C |
| ATOM | 1623 | CG1 | ILE | C | 213 | -4.791 | 31.395 | -31.714 | 1.00 | 31.10 | C |

|      |      |     |     |   |     |        |        |         |      |       |   |
|------|------|-----|-----|---|-----|--------|--------|---------|------|-------|---|
| ATOM | 1624 | CG2 | ILE | C | 213 | -3.687 | 32.352 | -29.694 | 1.00 | 30.55 | C |
| ATOM | 1625 | CD1 | ILE | C | 213 | -6.015 | 31.376 | -32.592 | 1.00 | 30.49 | C |
| ATOM | 1626 | N   | THR | C | 214 | -5.611 | 28.494 | -29.735 | 1.00 | 34.56 | N |
| ATOM | 1627 | CA  | THR | C | 214 | -5.209 | 27.109 | -29.404 | 1.00 | 36.07 | C |
| ATOM | 1628 | C   | THR | C | 214 | -4.886 | 26.325 | -30.673 | 1.00 | 34.70 | C |
| ATOM | 1629 | O   | THR | C | 214 | -5.780 | 25.944 | -31.416 | 1.00 | 39.13 | O |
| ATOM | 1630 | CB  | THR | C | 214 | -6.306 | 26.417 | -28.577 | 1.00 | 35.65 | C |
| ATOM | 1631 | CG2 | THR | C | 214 | -5.957 | 24.971 | -28.297 | 1.00 | 34.86 | C |
| ATOM | 1632 | OG1 | THR | C | 214 | -6.544 | 27.108 | -27.339 | 1.00 | 34.41 | O |
| ATOM | 1633 | N   | PRO | C | 215 | -3.609 | 26.065 | -30.988 | 1.00 | 34.53 | N |
| ATOM | 1634 | CA  | PRO | C | 215 | -3.254 | 25.164 | -32.085 | 1.00 | 39.34 | C |
| ATOM | 1635 | C   | PRO | C | 215 | -3.833 | 23.744 | -31.935 | 1.00 | 41.46 | C |
| ATOM | 1636 | O   | PRO | C | 215 | -3.929 | 23.259 | -30.826 | 1.00 | 39.51 | O |
| ATOM | 1637 | CB  | PRO | C | 215 | -1.723 | 25.077 | -32.010 | 1.00 | 37.33 | C |
| ATOM | 1638 | CG  | PRO | C | 215 | -1.329 | 26.365 | -31.336 | 1.00 | 37.17 | C |
| ATOM | 1639 | CD  | PRO | C | 215 | -2.435 | 26.642 | -30.335 | 1.00 | 37.06 | C |
| ATOM | 1640 | N   | ILE | C | 216 | -4.175 | 23.107 | -33.067 | 1.00 | 41.36 | N |
| ATOM | 1641 | CA  | ILE | C | 216 | -4.758 | 21.772 | -33.118 | 1.00 | 38.83 | C |
| ATOM | 1642 | C   | ILE | C | 216 | -4.399 | 21.141 | -34.468 | 1.00 | 41.75 | C |
| ATOM | 1643 | O   | ILE | C | 216 | -4.236 | 21.845 | -35.485 | 1.00 | 43.86 | O |
| ATOM | 1644 | CB  | ILE | C | 216 | -6.282 | 21.841 | -32.877 | 1.00 | 40.42 | C |
| ATOM | 1645 | CG1 | ILE | C | 216 | -6.906 | 20.450 | -32.720 | 1.00 | 43.55 | C |
| ATOM | 1646 | CG2 | ILE | C | 216 | -6.991 | 22.636 | -33.965 | 1.00 | 40.81 | C |
| ATOM | 1647 | CD1 | ILE | C | 216 | -8.359 | 20.467 | -32.314 | 1.00 | 41.64 | C |
| ATOM | 1648 | N   | SER | C | 217 | -4.285 | 19.807 | -34.490 | 1.00 | 45.12 | N |
| ATOM | 1649 | CA  | SER | C | 217 | -3.925 | 19.062 | -35.714 | 1.00 | 42.98 | C |
| ATOM | 1650 | C   | SER | C | 217 | -4.470 | 17.641 | -35.646 | 1.00 | 45.94 | C |
| ATOM | 1651 | O   | SER | C | 217 | -4.440 | 17.031 | -34.572 | 1.00 | 46.40 | O |
| ATOM | 1652 | CB  | SER | C | 217 | -2.453 | 19.045 | -35.947 | 1.00 | 43.17 | C |
| ATOM | 1653 | OG  | SER | C | 217 | -2.160 | 18.379 | -37.165 | 1.00 | 46.40 | O |
| ATOM | 1654 | N   | ILE | C | 218 | -4.986 | 17.152 | -36.789 | 1.00 | 47.57 | N |
| ATOM | 1655 | CA  | ILE | C | 218 | -5.531 | 15.807 | -36.890 | 1.00 | 47.73 | C |
| ATOM | 1656 | C   | ILE | C | 218 | -4.998 | 15.083 | -38.141 | 1.00 | 53.15 | C |



|      |      |     |     |   |     |         |        |         |      |       |     |
|------|------|-----|-----|---|-----|---------|--------|---------|------|-------|-----|
| ATOM | 1657 | O   | ILE | C | 218 | -4.723  | 15.669 | -39.166 | 1.00 | 57.49 | O   |
| ATOM | 1658 | CB  | ILE | C | 218 | -7.066  | 15.833 | -36.852 | 1.00 | 46.73 | C   |
| ATOM | 1659 | CG1 | ILE | C | 218 | -7.665  | 16.513 | -38.080 | 1.00 | 46.99 | C   |
| ATOM | 1660 | CG2 | ILE | C | 218 | -7.582  | 16.443 | -35.555 | 1.00 | 47.00 | C   |
| ATOM | 1661 | CD1 | ILE | C | 218 | -9.146  | 16.258 | -38.222 | 1.00 | 44.54 | C   |
| ATOM | 1662 | N   | SER | C | 219 | -4.878  | 13.760 | -38.025 | 1.00 | 56.13 | N   |
| ATOM | 1663 | CA  | SER | C | 219 | -4.368  | 12.859 | -39.076 | 1.00 | 52.11 | C   |
| ATOM | 1664 | C   | SER | C | 219 | -5.409  | 12.631 | -40.171 | 1.00 | 50.21 | C   |
| ATOM | 1665 | O   | SER | C | 219 | -6.620  | 12.771 | -39.913 | 1.00 | 44.07 | O   |
| ATOM | 1666 | CB  | SER | C | 219 | -4.012  | 11.539 | -38.467 | 1.00 | 49.32 | C   |
| ATOM | 1667 | OG  | SER | C | 219 | -5.154  | 10.979 | -37.824 | 1.00 | 47.80 | O   |
| ATOM | 1668 | N   | PRO | C | 220 | -4.976  | 12.206 | -41.392 | 1.00 | 47.32 | N   |
| ATOM | 1669 | CA  | PRO | C | 220 | -5.906  | 11.729 | -42.425 | 1.00 | 50.95 | C   |
| ATOM | 1670 | C   | PRO | C | 220 | -6.967  | 10.723 | -41.909 | 1.00 | 55.91 | C   |
| ATOM | 1671 | O   | PRO | C | 220 | -8.175  | 10.921 | -42.193 | 1.00 | 56.55 | O   |
| ATOM | 1672 | CB  | PRO | C | 220 | -4.962  | 11.145 | -43.498 | 1.00 | 47.90 | C   |
| ATOM | 1673 | CG  | PRO | C | 220 | -3.676  | 11.962 | -43.354 | 1.00 | 45.37 | C   |
| ATOM | 1674 | CD  | PRO | C | 220 | -3.570  | 12.185 | -41.859 | 1.00 | 46.42 | C   |
| ATOM | 1675 | N   | LYS | C | 221 | -6.579  | 9.699  | -41.120 | 1.00 | 53.73 | N   |
| ATOM | 1676 | CA  | LYS | C | 221 | -7.607  | 8.785  | -40.529 | 1.00 | 62.32 | C   |
| ATOM | 1677 | C   | LYS | C | 221 | -8.653  | 9.609  | -39.760 | 1.00 | 56.30 | C   |
| ATOM | 1678 | O   | LYS | C | 221 | -9.850  | 9.423  | -39.969 | 1.00 | 54.71 | O   |
| ATOM | 1679 | CB  | LYS | C | 221 | -7.077  | 7.740  | -39.534 | 1.00 | 71.42 | C   |
| ATOM | 1680 | CG  | LYS | C | 221 | -5.932  | 6.846  | -39.991 | 1.00 | 85.61 | C   |
| ATOM | 1681 | CD  | LYS | C | 221 | -4.901  | 6.598  | -38.874 | 1.00 | 96.46 | C   |
| ATOM | 1682 | CE  | LYS | C | 221 | -3.640  | 5.869  | -39.303 | 1.00 | 95.69 | C   |
| ATOM | 1683 | NZ  | LYS | C | 221 | -3.857  | 4.406  | -39.433 | 1.00 | 91.62 | N1+ |
| ATOM | 1684 | N   | ALA | C | 222 | -8.195  | 10.492 | -38.853 | 1.00 | 53.97 | N   |
| ATOM | 1685 | CA  | ALA | C | 222 | -9.101  | 11.260 | -37.951 | 1.00 | 51.73 | C   |
| ATOM | 1686 | C   | ALA | C | 222 | -10.067 | 12.152 | -38.743 | 1.00 | 46.45 | C   |
| ATOM | 1687 | O   | ALA | C | 222 | -11.221 | 12.300 | -38.363 | 1.00 | 45.42 | O   |
| ATOM | 1688 | CB  | ALA | C | 222 | -8.294  | 12.076 | -36.979 | 1.00 | 54.79 | C   |
| ATOM | 1689 | N   | LEU | C | 223 | -9.591  | 12.734 | -39.846 | 1.00 | 45.80 | N   |

|      |      |     |     |   |     |         |        |         |      |        |     |
|------|------|-----|-----|---|-----|---------|--------|---------|------|--------|-----|
| ATOM | 1690 | CA  | LEU | C | 223 | -10.424 | 13.575 | -40.714 | 1.00 | 49.90  | C   |
| ATOM | 1691 | C   | LEU | C | 223 | -11.552 | 12.728 | -41.332 | 1.00 | 54.20  | C   |
| ATOM | 1692 | O   | LEU | C | 223 | -12.715 | 13.149 | -41.343 | 1.00 | 49.00  | O   |
| ATOM | 1693 | CB  | LEU | C | 223 | -9.520  | 14.209 | -41.780 | 1.00 | 48.63  | C   |
| ATOM | 1694 | CG  | LEU | C | 223 | -10.190 | 15.061 | -42.860 | 1.00 | 46.12  | C   |
| ATOM | 1695 | CD1 | LEU | C | 223 | -10.951 | 16.232 | -42.263 | 1.00 | 42.12  | C   |
| ATOM | 1696 | CD2 | LEU | C | 223 | -9.146  | 15.556 | -43.851 | 1.00 | 46.89  | C   |
| ATOM | 1697 | N   | GLU | C | 224 | -11.201 | 11.532 | -41.822 | 1.00 | 58.58  | N   |
| ATOM | 1698 | CA  | GLU | C | 224 | -12.158 | 10.619 | -42.472 | 1.00 | 61.06  | C   |
| ATOM | 1699 | C   | GLU | C | 224 | -13.190 | 10.134 | -41.448 | 1.00 | 55.14  | C   |
| ATOM | 1700 | O   | GLU | C | 224 | -14.370 | 9.966  | -41.769 | 1.00 | 53.73  | O   |
| ATOM | 1701 | CB  | GLU | C | 224 | -11.427 | 9.439  | -43.120 | 1.00 | 74.94  | C   |
| ATOM | 1702 | CG  | GLU | C | 224 | -12.352 | 8.454  | -43.827 | 1.00 | 87.04  | C   |
| ATOM | 1703 | CD  | GLU | C | 224 | -11.667 | 7.330  | -44.598 | 1.00 | 100.44 | C   |
| ATOM | 1704 | OE1 | GLU | C | 224 | -10.666 | 6.754  | -44.087 | 1.00 | 96.71  | O   |
| ATOM | 1705 | OE2 | GLU | C | 224 | -12.147 | 7.018  | -45.713 | 1.00 | 103.10 | O1- |
| ATOM | 1706 | N   | VAL | C | 225 | -12.769 | 9.924  | -40.201 | 1.00 | 52.39  | N   |
| ATOM | 1707 | CA  | VAL | C | 225 | -13.733 | 9.527  | -39.177 | 1.00 | 55.68  | C   |
| ATOM | 1708 | C   | VAL | C | 225 | -14.763 | 10.646 | -38.949 | 1.00 | 58.48  | C   |
| ATOM | 1709 | O   | VAL | C | 225 | -15.905 | 10.345 | -38.633 | 1.00 | 62.69  | O   |
| ATOM | 1710 | CB  | VAL | C | 225 | -13.028 | 9.118  | -37.876 | 1.00 | 58.42  | C   |
| ATOM | 1711 | CG1 | VAL | C | 225 | -14.003 | 8.986  | -36.708 | 1.00 | 60.04  | C   |
| ATOM | 1712 | CG2 | VAL | C | 225 | -12.241 | 7.832  | -38.077 | 1.00 | 59.27  | C   |
| ATOM | 1713 | N   | ILE | C | 226 | -14.370 | 11.920 | -39.115 | 1.00 | 56.98  | N   |
| ATOM | 1714 | CA  | ILE | C | 226 | -15.294 | 13.061 | -38.922 | 1.00 | 59.97  | C   |
| ATOM | 1715 | C   | ILE | C | 226 | -16.263 | 13.166 | -40.119 | 1.00 | 57.27  | C   |
| ATOM | 1716 | O   | ILE | C | 226 | -17.466 | 13.292 | -39.918 | 1.00 | 59.26  | O   |
| ATOM | 1717 | CB  | ILE | C | 226 | -14.534 | 14.381 | -38.629 | 1.00 | 59.45  | C   |
| ATOM | 1718 | CG1 | ILE | C | 226 | -13.794 | 14.301 | -37.289 | 1.00 | 63.07  | C   |
| ATOM | 1719 | CG2 | ILE | C | 226 | -15.476 | 15.576 | -38.660 | 1.00 | 57.35  | C   |
| ATOM | 1720 | CD1 | ILE | C | 226 | -12.667 | 15.306 | -37.115 | 1.00 | 63.05  | C   |
| ATOM | 1721 | N   | ARG | C | 227 | -15.737 | 13.101 | -41.345 | 1.00 | 56.91  | N   |
| ATOM | 1722 | CA  | ARG | C | 227 | -16.540 | 13.087 | -42.586 | 1.00 | 58.10  | C   |

|      |      |     |           |         |        |         |      |        |     |
|------|------|-----|-----------|---------|--------|---------|------|--------|-----|
| ATOM | 1723 | C   | ARG C 227 | -17.556 | 11.928 | -42.594 | 1.00 | 58.29  | C   |
| ATOM | 1724 | O   | ARG C 227 | -18.632 | 12.063 | -43.175 | 1.00 | 53.86  | O   |
| ATOM | 1725 | CB  | ARG C 227 | -15.608 | 13.001 | -43.802 | 1.00 | 55.67  | C   |
| ATOM | 1726 | CG  | ARG C 227 | -14.947 | 14.323 | -44.183 | 1.00 | 56.00  | C   |
| ATOM | 1727 | CD  | ARG C 227 | -13.855 | 14.180 | -45.229 | 1.00 | 52.45  | C   |
| ATOM | 1728 | NE  | ARG C 227 | -13.188 | 15.440 | -45.537 | 1.00 | 53.52  | N   |
| ATOM | 1729 | CZ  | ARG C 227 | -11.983 | 15.527 | -46.097 | 1.00 | 57.52  | C   |
| ATOM | 1730 | NH1 | ARG C 227 | -11.231 | 14.447 | -46.203 | 1.00 | 56.27  | N1+ |
| ATOM | 1731 | NH2 | ARG C 227 | -11.535 | 16.679 | -46.571 | 1.00 | 57.39  | N   |
| ATOM | 1732 | N   | SER C 228 | -17.201 | 10.802 | -41.951 | 1.00 | 63.55  | N   |
| ATOM | 1733 | CA  | SER C 228 | -18.021 | 9.579  | -41.880 | 1.00 | 59.96  | C   |
| ATOM | 1734 | C   | SER C 228 | -19.214 | 9.751  | -40.939 | 1.00 | 60.66  | C   |
| ATOM | 1735 | O   | SER C 228 | -20.141 | 8.975  | -41.003 | 1.00 | 72.67  | O   |
| ATOM | 1736 | CB  | SER C 228 | -17.194 | 8.385  | -41.433 | 1.00 | 59.42  | C   |
| ATOM | 1737 | OG  | SER C 228 | -16.485 | 7.830  | -42.526 | 1.00 | 58.28  | O   |
| ATOM | 1738 | N   | ARG C 229 | -19.152 | 10.708 | -40.012 | 1.00 | 59.40  | N   |
| ATOM | 1739 | CA  | ARG C 229 | -20.216 | 10.900 | -39.024 | 1.00 | 68.60  | C   |
| ATOM | 1740 | C   | ARG C 229 | -21.591 | 10.829 | -39.701 | 1.00 | 72.04  | C   |
| ATOM | 1741 | O   | ARG C 229 | -21.808 | 11.444 | -40.741 | 1.00 | 66.39  | O   |
| ATOM | 1742 | CB  | ARG C 229 | -20.090 | 12.255 | -38.315 | 1.00 | 69.73  | C   |
| ATOM | 1743 | CG  | ARG C 229 | -19.022 | 12.305 | -37.234 | 1.00 | 66.56  | C   |
| ATOM | 1744 | CD  | ARG C 229 | -19.058 | 13.605 | -36.465 | 1.00 | 66.87  | C   |
| ATOM | 1745 | NE  | ARG C 229 | -20.253 | 13.764 | -35.638 | 1.00 | 67.71  | N   |
| ATOM | 1746 | CZ  | ARG C 229 | -20.272 | 13.871 | -34.299 | 1.00 | 63.05  | C   |
| ATOM | 1747 | NH1 | ARG C 229 | -19.151 | 13.930 | -33.595 | 1.00 | 58.09  | N1+ |
| ATOM | 1748 | NH2 | ARG C 229 | -21.434 | 13.915 | -33.668 | 1.00 | 49.95  | N   |
| ATOM | 1749 | N   | LYS C 230 | -22.513 | 10.091 | -39.079 | 1.00 | 77.15  | N   |
| ATOM | 1750 | CA  | LYS C 230 | -23.898 | 10.041 | -39.523 | 1.00 | 81.71  | C   |
| ATOM | 1751 | C   | LYS C 230 | -24.597 | 11.282 | -38.968 | 1.00 | 70.30  | C   |
| ATOM | 1752 | O   | LYS C 230 | -25.222 | 12.002 | -39.717 | 1.00 | 68.57  | O   |
| ATOM | 1753 | CB  | LYS C 230 | -24.596 | 8.739  | -39.102 | 1.00 | 90.76  | C   |
| ATOM | 1754 | CG  | LYS C 230 | -23.782 | 7.467  | -39.327 | 1.00 | 103.23 | C   |
| ATOM | 1755 | CD  | LYS C 230 | -22.996 | 6.997  | -38.092 | 1.00 | 106.60 | C   |

|      |      |     |     |   |     |         |        |         |      |       |     |
|------|------|-----|-----|---|-----|---------|--------|---------|------|-------|-----|
| ATOM | 1756 | CE  | LYS | C | 230 | -21.540 | 6.649  | -38.360 | 1.00 | 97.16 | C   |
| ATOM | 1757 | NZ  | LYS | C | 230 | -21.397 | 5.407  | -39.157 | 1.00 | 88.22 | N1+ |
| ATOM | 1758 | N   | THR | C | 231 | -24.456 | 11.523 | -37.658 | 1.00 | 67.82 | N   |
| ATOM | 1759 | CA  | THR | C | 231 | -25.022 | 12.716 | -36.992 | 1.00 | 63.67 | C   |
| ATOM | 1760 | C   | THR | C | 231 | -24.060 | 13.896 | -37.077 | 1.00 | 64.09 | C   |
| ATOM | 1761 | O   | THR | C | 231 | -22.836 | 13.735 | -37.161 | 1.00 | 61.98 | O   |
| ATOM | 1762 | CB  | THR | C | 231 | -25.331 | 12.455 | -35.517 | 1.00 | 63.94 | C   |
| ATOM | 1763 | CG2 | THR | C | 231 | -26.318 | 11.322 | -35.323 | 1.00 | 63.33 | C   |
| ATOM | 1764 | OG1 | THR | C | 231 | -24.072 | 12.169 | -34.899 | 1.00 | 63.69 | O   |
| ATOM | 1765 | N   | PRO | C | 232 | -24.591 | 15.134 | -37.031 | 1.00 | 58.87 | N   |
| ATOM | 1766 | CA  | PRO | C | 232 | -23.742 | 16.327 | -37.003 | 1.00 | 60.03 | C   |
| ATOM | 1767 | C   | PRO | C | 232 | -23.106 | 16.576 | -35.618 | 1.00 | 58.68 | C   |
| ATOM | 1768 | O   | PRO | C | 232 | -23.805 | 16.421 | -34.607 | 1.00 | 51.54 | O   |
| ATOM | 1769 | CB  | PRO | C | 232 | -24.760 | 17.418 | -37.341 | 1.00 | 59.20 | C   |
| ATOM | 1770 | CG  | PRO | C | 232 | -26.026 | 16.933 | -36.678 | 1.00 | 59.17 | C   |
| ATOM | 1771 | CD  | PRO | C | 232 | -26.024 | 15.444 | -36.935 | 1.00 | 54.89 | C   |
| ATOM | 1772 | N   | SER | C | 233 | -21.813 | 16.949 | -35.577 | 1.00 | 53.88 | N   |
| ATOM | 1773 | CA  | SER | C | 233 | -21.153 | 17.365 | -34.327 | 1.00 | 54.74 | C   |
| ATOM | 1774 | C   | SER | C | 233 | -21.885 | 18.575 | -33.748 | 1.00 | 55.11 | C   |
| ATOM | 1775 | O   | SER | C | 233 | -22.433 | 19.384 | -34.485 | 1.00 | 65.39 | O   |
| ATOM | 1776 | CB  | SER | C | 233 | -19.684 | 17.650 | -34.502 | 1.00 | 55.63 | C   |
| ATOM | 1777 | OG  | SER | C | 233 | -19.475 | 18.783 | -35.328 | 1.00 | 64.75 | O   |
| ATOM | 1778 | N   | LYS | C | 234 | -21.846 | 18.698 | -32.421 | 1.00 | 54.21 | N   |
| ATOM | 1779 | CA  | LYS | C | 234 | -22.768 | 19.541 | -31.657 | 1.00 | 53.76 | C   |
| ATOM | 1780 | C   | LYS | C | 234 | -22.425 | 21.042 | -31.682 | 1.00 | 49.47 | C   |
| ATOM | 1781 | O   | LYS | C | 234 | -23.264 | 21.845 | -31.273 | 1.00 | 49.76 | O   |
| ATOM | 1782 | CB  | LYS | C | 234 | -22.748 | 19.089 | -30.192 | 1.00 | 62.13 | C   |
| ATOM | 1783 | CG  | LYS | C | 234 | -22.981 | 17.599 | -29.969 | 1.00 | 61.60 | C   |
| ATOM | 1784 | CD  | LYS | C | 234 | -24.092 | 17.330 | -28.979 | 1.00 | 63.91 | C   |
| ATOM | 1785 | CE  | LYS | C | 234 | -25.150 | 16.375 | -29.495 | 1.00 | 65.80 | C   |
| ATOM | 1786 | NZ  | LYS | C | 234 | -24.734 | 14.968 | -29.300 | 1.00 | 66.66 | N1+ |
| ATOM | 1787 | N   | VAL | C | 235 | -21.192 | 21.421 | -32.054 | 1.00 | 46.95 | N   |
| ATOM | 1788 | CA  | VAL | C | 235 | -20.726 | 22.776 | -31.875 | 1.00 | 48.40 | C   |

|      |      |     |     |   |     |         |        |         |      |       |   |
|------|------|-----|-----|---|-----|---------|--------|---------|------|-------|---|
| ATOM | 1789 | C   | VAL | C | 235 | -20.221 | 23.321 | -33.205 | 1.00 | 46.28 | C |
| ATOM | 1790 | O   | VAL | C | 235 | -19.174 | 22.897 | -33.686 | 1.00 | 50.55 | O |
| ATOM | 1791 | CB  | VAL | C | 235 | -19.625 | 22.869 | -30.808 | 1.00 | 53.77 | C |
| ATOM | 1792 | CG1 | VAL | C | 235 | -19.188 | 24.315 | -30.602 | 1.00 | 57.05 | C |
| ATOM | 1793 | CG2 | VAL | C | 235 | -20.070 | 22.257 | -29.494 | 1.00 | 54.11 | C |
| ATOM | 1794 | N   | PHE | C | 236 | -20.986 | 24.273 | -33.754 | 1.00 | 46.32 | N |
| ATOM | 1795 | CA  | PHE | C | 236 | -20.653 | 24.965 | -35.013 | 1.00 | 45.71 | C |
| ATOM | 1796 | C   | PHE | C | 236 | -19.297 | 25.666 | -34.905 | 1.00 | 44.86 | C |
| ATOM | 1797 | O   | PHE | C | 236 | -18.495 | 25.665 | -35.830 | 1.00 | 43.00 | O |
| ATOM | 1798 | CB  | PHE | C | 236 | -21.724 | 25.996 | -35.364 | 1.00 | 42.22 | C |
| ATOM | 1799 | CG  | PHE | C | 236 | -21.355 | 26.845 | -36.549 | 1.00 | 45.58 | C |
| ATOM | 1800 | CD1 | PHE | C | 236 | -20.449 | 27.884 | -36.426 | 1.00 | 47.10 | C |
| ATOM | 1801 | CD2 | PHE | C | 236 | -21.877 | 26.576 | -37.805 | 1.00 | 48.29 | C |
| ATOM | 1802 | CE1 | PHE | C | 236 | -20.093 | 28.648 | -37.527 | 1.00 | 48.50 | C |
| ATOM | 1803 | CE2 | PHE | C | 236 | -21.545 | 27.360 | -38.898 | 1.00 | 45.38 | C |
| ATOM | 1804 | CZ  | PHE | C | 236 | -20.647 | 28.392 | -38.759 | 1.00 | 46.54 | C |
| ATOM | 1805 | N   | TYR | C | 237 | -19.062 | 26.261 | -33.739 | 1.00 | 46.52 | N |
| ATOM | 1806 | CA  | TYR | C | 237 | -17.955 | 27.130 | -33.520 | 1.00 | 45.13 | C |
| ATOM | 1807 | C   | TYR | C | 237 | -16.633 | 26.356 | -33.632 | 1.00 | 47.74 | C |
| ATOM | 1808 | O   | TYR | C | 237 | -15.644 | 26.973 | -33.982 | 1.00 | 45.25 | O |
| ATOM | 1809 | CB  | TYR | C | 237 | -18.171 | 27.825 | -32.175 | 1.00 | 49.26 | C |
| ATOM | 1810 | CG  | TYR | C | 237 | -17.089 | 28.784 | -31.776 | 1.00 | 49.47 | C |
| ATOM | 1811 | CD1 | TYR | C | 237 | -17.002 | 30.037 | -32.354 | 1.00 | 50.94 | C |
| ATOM | 1812 | CD2 | TYR | C | 237 | -16.143 | 28.429 | -30.835 | 1.00 | 48.38 | C |
| ATOM | 1813 | CE1 | TYR | C | 237 | -15.989 | 30.917 | -32.012 | 1.00 | 51.26 | C |
| ATOM | 1814 | CE2 | TYR | C | 237 | -15.128 | 29.298 | -30.479 | 1.00 | 54.91 | C |
| ATOM | 1815 | CZ  | TYR | C | 237 | -15.052 | 30.551 | -31.060 | 1.00 | 54.34 | C |
| ATOM | 1816 | OH  | TYR | C | 237 | -14.061 | 31.411 | -30.677 | 1.00 | 46.65 | O |
| ATOM | 1817 | N   | TRP | C | 238 | -16.610 | 25.030 | -33.354 | 1.00 | 50.89 | N |
| ATOM | 1818 | CA  | TRP | C | 238 | -15.348 | 24.201 | -33.516 | 1.00 | 48.50 | C |
| ATOM | 1819 | C   | TRP | C | 238 | -15.572 | 22.853 | -34.227 | 1.00 | 45.02 | C |
| ATOM | 1820 | O   | TRP | C | 238 | -14.820 | 21.918 | -33.993 | 1.00 | 50.08 | O |
| ATOM | 1821 | CB  | TRP | C | 238 | -14.583 | 23.995 | -32.181 | 1.00 | 49.96 | C |

|      |      |     |     |   |     |         |        |         |      |       |     |
|------|------|-----|-----|---|-----|---------|--------|---------|------|-------|-----|
| ATOM | 1822 | CG  | TRP | C | 238 | -15.367 | 23.471 | -31.015 | 1.00 | 44.32 | C   |
| ATOM | 1823 | CD1 | TRP | C | 238 | -16.083 | 22.313 | -30.952 | 1.00 | 42.00 | C   |
| ATOM | 1824 | CD2 | TRP | C | 238 | -15.482 | 24.090 | -29.719 | 1.00 | 45.44 | C   |
| ATOM | 1825 | CE2 | TRP | C | 238 | -16.335 | 23.266 | -28.945 | 1.00 | 45.94 | C   |
| ATOM | 1826 | CE3 | TRP | C | 238 | -14.968 | 25.265 | -29.140 | 1.00 | 40.90 | C   |
| ATOM | 1827 | NE1 | TRP | C | 238 | -16.691 | 22.198 | -29.731 | 1.00 | 44.60 | N   |
| ATOM | 1828 | CZ2 | TRP | C | 238 | -16.670 | 23.575 | -27.624 | 1.00 | 45.64 | C   |
| ATOM | 1829 | CZ3 | TRP | C | 238 | -15.324 | 25.584 | -27.846 | 1.00 | 41.83 | C   |
| ATOM | 1830 | CH2 | TRP | C | 238 | -16.166 | 24.748 | -27.102 | 1.00 | 45.80 | C   |
| ATOM | 1831 | N   | ASP | C | 239 | -16.574 | 22.749 | -35.104 | 1.00 | 49.08 | N   |
| ATOM | 1832 | CA  | ASP | C | 239 | -16.632 | 21.689 | -36.112 | 1.00 | 43.80 | C   |
| ATOM | 1833 | C   | ASP | C | 239 | -15.454 | 21.870 | -37.074 | 1.00 | 43.84 | C   |
| ATOM | 1834 | O   | ASP | C | 239 | -15.395 | 22.858 | -37.802 | 1.00 | 49.51 | O   |
| ATOM | 1835 | CB  | ASP | C | 239 | -17.939 | 21.761 | -36.895 | 1.00 | 45.34 | C   |
| ATOM | 1836 | CG  | ASP | C | 239 | -18.060 | 20.823 | -38.097 | 1.00 | 45.06 | C   |
| ATOM | 1837 | OD1 | ASP | C | 239 | -17.007 | 20.443 | -38.697 | 1.00 | 36.90 | O   |
| ATOM | 1838 | OD2 | ASP | C | 239 | -19.228 | 20.512 | -38.448 | 1.00 | 40.22 | O1- |
| ATOM | 1839 | N   | LEU | C | 240 | -14.543 | 20.895 | -37.115 | 1.00 | 42.81 | N   |
| ATOM | 1840 | CA  | LEU | C | 240 | -13.287 | 21.069 | -37.813 | 1.00 | 43.75 | C   |
| ATOM | 1841 | C   | LEU | C | 240 | -13.446 | 21.042 | -39.339 | 1.00 | 48.17 | C   |
| ATOM | 1842 | O   | LEU | C | 240 | -12.459 | 21.335 | -40.044 | 1.00 | 47.17 | O   |
| ATOM | 1843 | CB  | LEU | C | 240 | -12.306 | 19.986 | -37.359 | 1.00 | 44.78 | C   |
| ATOM | 1844 | CG  | LEU | C | 240 | -12.020 | 19.925 | -35.857 | 1.00 | 44.18 | C   |
| ATOM | 1845 | CD1 | LEU | C | 240 | -10.920 | 18.911 | -35.593 | 1.00 | 40.37 | C   |
| ATOM | 1846 | CD2 | LEU | C | 240 | -11.636 | 21.300 | -35.306 | 1.00 | 43.81 | C   |
| ATOM | 1847 | N   | LEU | C | 241 | -14.633 | 20.682 | -39.860 | 1.00 | 53.45 | N   |
| ATOM | 1848 | CA  | LEU | C | 241 | -14.824 | 20.568 | -41.338 | 1.00 | 57.83 | C   |
| ATOM | 1849 | C   | LEU | C | 241 | -15.111 | 21.948 | -41.944 | 1.00 | 60.75 | C   |
| ATOM | 1850 | O   | LEU | C | 241 | -14.748 | 22.190 | -43.103 | 1.00 | 52.34 | O   |
| ATOM | 1851 | CB  | LEU | C | 241 | -15.964 | 19.602 | -41.665 | 1.00 | 56.74 | C   |
| ATOM | 1852 | CG  | LEU | C | 241 | -15.735 | 18.149 | -41.261 | 1.00 | 56.54 | C   |
| ATOM | 1853 | CD1 | LEU | C | 241 | -16.875 | 17.264 | -41.761 | 1.00 | 51.65 | C   |
| ATOM | 1854 | CD2 | LEU | C | 241 | -14.387 | 17.662 | -41.768 | 1.00 | 57.37 | C   |

|      |      |     |     |   |     |         |        |         |      |       |   |
|------|------|-----|-----|---|-----|---------|--------|---------|------|-------|---|
| ATOM | 1855 | N   | ILE | C | 242 | -15.753 | 22.824 | -41.152 | 1.00 | 57.89 | N |
| ATOM | 1856 | CA  | ILE | C | 242 | -16.045 | 24.177 | -41.565 | 1.00 | 53.65 | C |
| ATOM | 1857 | C   | ILE | C | 242 | -14.971 | 25.152 | -41.040 | 1.00 | 54.90 | C |
| ATOM | 1858 | O   | ILE | C | 242 | -14.529 | 26.011 | -41.780 | 1.00 | 55.80 | O |
| ATOM | 1859 | CB  | ILE | C | 242 | -17.496 | 24.538 | -41.204 | 1.00 | 51.81 | C |
| ATOM | 1860 | CG1 | ILE | C | 242 | -17.780 | 24.626 | -39.713 | 1.00 | 55.23 | C |
| ATOM | 1861 | CG2 | ILE | C | 242 | -18.439 | 23.537 | -41.841 | 1.00 | 48.71 | C |
| ATOM | 1862 | CD1 | ILE | C | 242 | -19.219 | 25.038 | -39.427 | 1.00 | 54.49 | C |
| ATOM | 1863 | N   | LEU | C | 243 | -14.487 | 24.984 | -39.805 | 1.00 | 51.52 | N |
| ATOM | 1864 | CA  | LEU | C | 243 | -13.367 | 25.821 | -39.324 | 1.00 | 53.11 | C |
| ATOM | 1865 | C   | LEU | C | 243 | -12.110 | 25.548 | -40.166 | 1.00 | 50.11 | C |
| ATOM | 1866 | O   | LEU | C | 243 | -11.356 | 26.461 | -40.486 | 1.00 | 48.83 | O |
| ATOM | 1867 | CB  | LEU | C | 243 | -13.122 | 25.564 | -37.829 | 1.00 | 56.91 | C |
| ATOM | 1868 | CG  | LEU | C | 243 | -11.926 | 26.288 | -37.202 | 1.00 | 53.58 | C |
| ATOM | 1869 | CD1 | LEU | C | 243 | -12.220 | 27.773 | -37.040 | 1.00 | 50.71 | C |
| ATOM | 1870 | CD2 | LEU | C | 243 | -11.533 | 25.664 | -35.858 | 1.00 | 52.26 | C |
| ATOM | 1871 | N   | GLY | C | 244 | -11.894 | 24.284 | -40.537 | 1.00 | 50.81 | N |
| ATOM | 1872 | CA  | GLY | C | 244 | -10.771 | 23.894 | -41.381 | 1.00 | 45.37 | C |
| ATOM | 1873 | C   | GLY | C | 244 | -10.821 | 24.593 | -42.731 | 1.00 | 46.63 | C |
| ATOM | 1874 | O   | GLY | C | 244 | -9.777  | 24.881 | -43.342 | 1.00 | 44.81 | O |
| ATOM | 1875 | N   | ASN | C | 245 | -12.050 | 24.849 | -43.204 | 1.00 | 46.23 | N |
| ATOM | 1876 | CA  | ASN | C | 245 | -12.280 | 25.543 | -44.457 | 1.00 | 44.56 | C |
| ATOM | 1877 | C   | ASN | C | 245 | -11.623 | 26.938 | -44.388 | 1.00 | 46.37 | C |
| ATOM | 1878 | O   | ASN | C | 245 | -10.719 | 27.216 | -45.195 | 1.00 | 43.33 | O |
| ATOM | 1879 | CB  | ASN | C | 245 | -13.773 | 25.575 | -44.801 | 1.00 | 46.20 | C |
| ATOM | 1880 | CG  | ASN | C | 245 | -14.069 | 26.474 | -45.985 | 1.00 | 54.41 | C |
| ATOM | 1881 | ND2 | ASN | C | 245 | -14.704 | 25.947 | -47.026 | 1.00 | 59.59 | N |
| ATOM | 1882 | OD1 | ASN | C | 245 | -13.714 | 27.645 | -45.964 | 1.00 | 51.55 | O |
| ATOM | 1883 | N   | TYR | C | 246 | -12.047 | 27.787 | -43.419 | 1.00 | 43.58 | N |
| ATOM | 1884 | CA  | TYR | C | 246 | -11.530 | 29.168 | -43.253 | 1.00 | 41.09 | C |
| ATOM | 1885 | C   | TYR | C | 246 | -9.991  | 29.174 | -43.168 | 1.00 | 40.34 | C |
| ATOM | 1886 | O   | TYR | C | 246 | -9.317  | 30.105 | -43.688 | 1.00 | 35.39 | O |
| ATOM | 1887 | CB  | TYR | C | 246 | -12.101 | 29.880 | -42.014 | 1.00 | 46.69 | C |

|      |      |     |     |   |     |         |        |         |      |       |   |
|------|------|-----|-----|---|-----|---------|--------|---------|------|-------|---|
| ATOM | 1888 | CG  | TYR | C | 246 | -11.449 | 31.233 | -41.829 | 1.00 | 53.26 | C |
| ATOM | 1889 | CD1 | TYR | C | 246 | -11.633 | 32.230 | -42.778 | 1.00 | 57.58 | C |
| ATOM | 1890 | CD2 | TYR | C | 246 | -10.528 | 31.475 | -40.818 | 1.00 | 55.33 | C |
| ATOM | 1891 | CE1 | TYR | C | 246 | -10.983 | 33.447 | -42.694 | 1.00 | 55.25 | C |
| ATOM | 1892 | CE2 | TYR | C | 246 | -9.873  | 32.692 | -40.712 | 1.00 | 57.64 | C |
| ATOM | 1893 | CZ  | TYR | C | 246 | -10.105 | 33.686 | -41.651 | 1.00 | 56.97 | C |
| ATOM | 1894 | OH  | TYR | C | 246 | -9.481  | 34.903 | -41.581 | 1.00 | 48.60 | O |
| ATOM | 1895 | N   | TRP | C | 247 | -9.445  | 28.149 | -42.490 | 1.00 | 37.86 | N |
| ATOM | 1896 | CA  | TRP | C | 247 | -8.024  | 28.003 | -42.262 | 1.00 | 38.26 | C |
| ATOM | 1897 | C   | TRP | C | 247 | -7.327  | 27.365 | -43.470 | 1.00 | 38.84 | C |
| ATOM | 1898 | O   | TRP | C | 247 | -6.121  | 27.080 | -43.430 | 1.00 | 40.06 | O |
| ATOM | 1899 | CB  | TRP | C | 247 | -7.766  | 27.237 | -40.953 | 1.00 | 39.89 | C |
| ATOM | 1900 | CG  | TRP | C | 247 | -7.887  | 28.106 | -39.736 | 1.00 | 38.39 | C |
| ATOM | 1901 | CD1 | TRP | C | 247 | -9.042  | 28.537 | -39.147 | 1.00 | 40.23 | C |
| ATOM | 1902 | CD2 | TRP | C | 247 | -6.819  | 28.689 | -38.972 | 1.00 | 35.11 | C |
| ATOM | 1903 | CE2 | TRP | C | 247 | -7.411  | 29.432 | -37.924 | 1.00 | 37.67 | C |
| ATOM | 1904 | CE3 | TRP | C | 247 | -5.428  | 28.643 | -39.056 | 1.00 | 41.56 | C |
| ATOM | 1905 | NE1 | TRP | C | 247 | -8.770  | 29.300 | -38.039 | 1.00 | 39.64 | N |
| ATOM | 1906 | CZ2 | TRP | C | 247 | -6.661  | 30.124 | -36.977 | 1.00 | 36.84 | C |
| ATOM | 1907 | CZ3 | TRP | C | 247 | -4.681  | 29.336 | -38.121 | 1.00 | 45.11 | C |
| ATOM | 1908 | CH2 | TRP | C | 247 | -5.292  | 30.064 | -37.092 | 1.00 | 40.50 | C |
| ATOM | 1909 | N   | GLY | C | 248 | -8.059  | 27.194 | -44.568 | 1.00 | 39.45 | N |
| ATOM | 1910 | CA  | GLY | C | 248 | -7.463  | 26.831 | -45.848 | 1.00 | 40.74 | C |
| ATOM | 1911 | C   | GLY | C | 248 | -6.820  | 25.467 | -45.785 | 1.00 | 39.90 | C |
| ATOM | 1912 | O   | GLY | C | 248 | -5.697  | 25.301 | -46.192 | 1.00 | 44.14 | O |
| ATOM | 1913 | N   | CYS | C | 249 | -7.564  | 24.505 | -45.240 | 1.00 | 46.42 | N |
| ATOM | 1914 | CA  | CYS | C | 249 | -7.086  | 23.164 | -44.926 | 1.00 | 48.95 | C |
| ATOM | 1915 | C   | CYS | C | 249 | -7.533  | 22.161 | -45.995 | 1.00 | 51.22 | C |
| ATOM | 1916 | O   | CYS | C | 249 | -6.911  | 21.106 | -46.148 | 1.00 | 59.48 | O |
| ATOM | 1917 | CB  | CYS | C | 249 | -7.599  | 22.729 | -43.556 | 1.00 | 51.61 | C |
| ATOM | 1918 | SG  | CYS | C | 249 | -6.627  | 23.366 | -42.157 | 1.00 | 50.90 | S |
| ATOM | 1919 | N   | TYR | C | 250 | -8.614  | 22.500 | -46.712 | 1.00 | 57.71 | N |
| ATOM | 1920 | CA  | TYR | C | 250 | -9.267  | 21.641 | -47.677 | 1.00 | 53.51 | C |



|      |      |     |     |   |     |         |        |         |      |       |     |
|------|------|-----|-----|---|-----|---------|--------|---------|------|-------|-----|
| ATOM | 1921 | C   | TYR | C | 250 | -9.195  | 22.274 | -49.069 | 1.00 | 62.28 | C   |
| ATOM | 1922 | O   | TYR | C | 250 | -8.681  | 23.381 | -49.211 | 1.00 | 59.16 | O   |
| ATOM | 1923 | CB  | TYR | C | 250 | -10.696 | 21.390 | -47.213 | 1.00 | 50.85 | C   |
| ATOM | 1924 | CG  | TYR | C | 250 | -10.786 | 20.953 | -45.773 | 1.00 | 52.28 | C   |
| ATOM | 1925 | CD1 | TYR | C | 250 | -9.967  | 19.946 | -45.267 | 1.00 | 51.19 | C   |
| ATOM | 1926 | CD2 | TYR | C | 250 | -11.693 | 21.542 | -44.909 | 1.00 | 49.57 | C   |
| ATOM | 1927 | CE1 | TYR | C | 250 | -10.047 | 19.545 | -43.942 | 1.00 | 48.15 | C   |
| ATOM | 1928 | CE2 | TYR | C | 250 | -11.775 | 21.163 | -43.581 | 1.00 | 51.45 | C   |
| ATOM | 1929 | CZ  | TYR | C | 250 | -10.946 | 20.167 | -43.092 | 1.00 | 48.00 | C   |
| ATOM | 1930 | OH  | TYR | C | 250 | -11.061 | 19.812 | -41.782 | 1.00 | 46.71 | O   |
| ATOM | 1931 | N   | ASP | C | 251 | -9.650  | 21.520 | -50.088 | 1.00 | 74.84 | N   |
| ATOM | 1932 | CA  | ASP | C | 251 | -9.816  | 22.007 | -51.482 | 1.00 | 70.10 | C   |
| ATOM | 1933 | C   | ASP | C | 251 | -11.261 | 22.488 | -51.628 | 1.00 | 67.15 | C   |
| ATOM | 1934 | O   | ASP | C | 251 | -12.123 | 21.768 | -52.113 | 1.00 | 66.55 | O   |
| ATOM | 1935 | CB  | ASP | C | 251 | -9.505  | 20.936 | -52.536 | 1.00 | 69.77 | C   |
| ATOM | 1936 | CG  | ASP | C | 251 | -8.186  | 20.196 | -52.372 | 1.00 | 68.17 | C   |
| ATOM | 1937 | OD1 | ASP | C | 251 | -7.130  | 20.805 | -52.634 | 1.00 | 67.03 | O   |
| ATOM | 1938 | OD2 | ASP | C | 251 | -8.229  | 18.999 | -52.022 | 1.00 | 62.86 | O1- |
| ATOM | 1939 | N   | GLU | C | 252 | -11.519 | 23.688 | -51.115 | 1.00 | 62.31 | N   |
| ATOM | 1940 | CA  | GLU | C | 252 | -12.811 | 24.330 | -51.225 | 1.00 | 60.88 | C   |
| ATOM | 1941 | C   | GLU | C | 252 | -12.605 | 25.843 | -51.333 | 1.00 | 59.48 | C   |
| ATOM | 1942 | O   | GLU | C | 252 | -11.506 | 26.341 | -51.161 | 1.00 | 58.02 | O   |
| ATOM | 1943 | CB  | GLU | C | 252 | -13.674 | 23.995 | -50.016 | 1.00 | 62.54 | C   |
| ATOM | 1944 | CG  | GLU | C | 252 | -13.583 | 22.552 | -49.590 | 1.00 | 58.92 | C   |
| ATOM | 1945 | CD  | GLU | C | 252 | -14.316 | 22.225 | -48.304 | 1.00 | 64.82 | C   |
| ATOM | 1946 | OE1 | GLU | C | 252 | -14.195 | 21.062 | -47.866 | 1.00 | 76.77 | O   |
| ATOM | 1947 | OE2 | GLU | C | 252 | -15.012 | 23.113 | -47.749 | 1.00 | 56.34 | O1- |
| ATOM | 1948 | N   | GLN | C | 253 | -13.672 | 26.567 | -51.660 | 1.00 | 66.70 | N   |
| ATOM | 1949 | CA  | GLN | C | 253 | -13.655 | 28.032 | -51.576 | 1.00 | 69.91 | C   |
| ATOM | 1950 | C   | GLN | C | 253 | -13.605 | 28.379 | -50.085 | 1.00 | 62.19 | C   |
| ATOM | 1951 | O   | GLN | C | 253 | -14.349 | 27.767 | -49.325 | 1.00 | 60.59 | O   |
| ATOM | 1952 | CB  | GLN | C | 253 | -14.899 | 28.612 | -52.262 | 1.00 | 74.53 | C   |
| ATOM | 1953 | CG  | GLN | C | 253 | -14.770 | 30.078 | -52.664 | 1.00 | 81.54 | C   |

|      |      |     |     |   |     |         |        |         |      |       |     |
|------|------|-----|-----|---|-----|---------|--------|---------|------|-------|-----|
| ATOM | 1954 | CD  | GLN | C | 253 | -15.838 | 30.501 | -53.646 | 1.00 | 86.34 | C   |
| ATOM | 1955 | NE2 | GLN | C | 253 | -15.835 | 29.892 | -54.823 | 1.00 | 83.77 | N   |
| ATOM | 1956 | OE1 | GLN | C | 253 | -16.674 | 31.354 | -53.351 | 1.00 | 89.79 | O   |
| ATOM | 1957 | N   | LYS | C | 254 | -12.716 | 29.296 | -49.671 | 1.00 | 57.63 | N   |
| ATOM | 1958 | CA  | LYS | C | 254 | -12.765 | 29.866 | -48.300 | 1.00 | 53.47 | C   |
| ATOM | 1959 | C   | LYS | C | 254 | -14.098 | 30.605 | -48.089 | 1.00 | 53.29 | C   |
| ATOM | 1960 | O   | LYS | C | 254 | -14.490 | 31.415 | -48.909 | 1.00 | 65.58 | O   |
| ATOM | 1961 | CB  | LYS | C | 254 | -11.598 | 30.818 | -48.034 | 1.00 | 53.78 | C   |
| ATOM | 1962 | CG  | LYS | C | 254 | -10.367 | 30.209 | -47.378 | 1.00 | 55.78 | C   |
| ATOM | 1963 | CD  | LYS | C | 254 | -9.122  | 31.059 | -47.571 | 1.00 | 58.44 | C   |
| ATOM | 1964 | CE  | LYS | C | 254 | -7.901  | 30.470 | -46.903 | 1.00 | 67.72 | C   |
| ATOM | 1965 | NZ  | LYS | C | 254 | -6.795  | 30.283 | -47.873 | 1.00 | 73.16 | N1+ |
| ATOM | 1966 | N   | ARG | C | 255 | -14.802 | 30.269 | -47.003 | 1.00 | 47.25 | N   |
| ATOM | 1967 | CA  | ARG | C | 255 | -15.968 | 30.987 | -46.517 | 1.00 | 53.93 | C   |
| ATOM | 1968 | C   | ARG | C | 255 | -15.654 | 31.539 | -45.117 | 1.00 | 57.44 | C   |
| ATOM | 1969 | O   | ARG | C | 255 | -14.716 | 31.105 | -44.416 | 1.00 | 54.05 | O   |
| ATOM | 1970 | CB  | ARG | C | 255 | -17.199 | 30.074 | -46.413 | 1.00 | 59.06 | C   |
| ATOM | 1971 | CG  | ARG | C | 255 | -17.596 | 29.375 | -47.711 | 1.00 | 61.44 | C   |
| ATOM | 1972 | CD  | ARG | C | 255 | -18.828 | 28.480 | -47.588 | 1.00 | 63.97 | C   |
| ATOM | 1973 | NE  | ARG | C | 255 | -18.864 | 27.526 | -46.464 | 1.00 | 68.37 | N   |
| ATOM | 1974 | CZ  | ARG | C | 255 | -18.392 | 26.265 | -46.482 | 1.00 | 72.12 | C   |
| ATOM | 1975 | NH1 | ARG | C | 255 | -17.630 | 25.833 | -47.476 | 1.00 | 72.87 | N1+ |
| ATOM | 1976 | NH2 | ARG | C | 255 | -18.669 | 25.437 | -45.489 | 1.00 | 62.55 | N   |
| ATOM | 1977 | N   | TYR | C | 256 | -16.449 | 32.515 | -44.700 | 1.00 | 53.99 | N   |
| ATOM | 1978 | CA  | TYR | C | 256 | -16.386 | 33.011 | -43.341 | 1.00 | 52.05 | C   |
| ATOM | 1979 | C   | TYR | C | 256 | -16.991 | 31.973 | -42.390 | 1.00 | 43.92 | C   |
| ATOM | 1980 | O   | TYR | C | 256 | -18.001 | 31.365 | -42.677 | 1.00 | 44.38 | O   |
| ATOM | 1981 | CB  | TYR | C | 256 | -17.104 | 34.359 | -43.257 | 1.00 | 52.67 | C   |
| ATOM | 1982 | CG  | TYR | C | 256 | -17.540 | 34.784 | -41.879 | 1.00 | 51.17 | C   |
| ATOM | 1983 | CD1 | TYR | C | 256 | -16.683 | 35.493 | -41.054 | 1.00 | 48.65 | C   |
| ATOM | 1984 | CD2 | TYR | C | 256 | -18.820 | 34.504 | -41.416 | 1.00 | 49.09 | C   |
| ATOM | 1985 | CE1 | TYR | C | 256 | -17.083 | 35.915 | -39.798 | 1.00 | 47.99 | C   |
| ATOM | 1986 | CE2 | TYR | C | 256 | -19.236 | 34.917 | -40.162 | 1.00 | 51.29 | C   |

|      |      |     |     |   |     |         |        |         |      |       |   |
|------|------|-----|-----|---|-----|---------|--------|---------|------|-------|---|
| ATOM | 1987 | CZ  | TYR | C | 256 | -18.359 | 35.623 | -39.354 | 1.00 | 51.98 | C |
| ATOM | 1988 | OH  | TYR | C | 256 | -18.748 | 36.049 | -38.122 | 1.00 | 57.14 | O |
| ATOM | 1989 | N   | HIS | C | 257 | -16.353 | 31.803 | -41.235 | 1.00 | 43.27 | N |
| ATOM | 1990 | CA  | HIS | C | 257 | -16.825 | 30.897 | -40.205 | 1.00 | 41.78 | C |
| ATOM | 1991 | C   | HIS | C | 257 | -17.144 | 31.707 | -38.932 | 1.00 | 45.08 | C |
| ATOM | 1992 | O   | HIS | C | 257 | -18.314 | 31.733 | -38.473 | 1.00 | 49.57 | O |
| ATOM | 1993 | CB  | HIS | C | 257 | -15.788 | 29.781 | -40.033 | 1.00 | 41.40 | C |
| ATOM | 1994 | CG  | HIS | C | 257 | -16.114 | 28.849 | -38.934 | 1.00 | 44.05 | C |
| ATOM | 1995 | CD2 | HIS | C | 257 | -17.196 | 28.074 | -38.720 | 1.00 | 48.66 | C |
| ATOM | 1996 | ND1 | HIS | C | 257 | -15.312 | 28.724 | -37.830 | 1.00 | 51.77 | N |
| ATOM | 1997 | CE1 | HIS | C | 257 | -15.875 | 27.880 | -36.990 | 1.00 | 51.89 | C |
| ATOM | 1998 | NE2 | HIS | C | 257 | -17.038 | 27.471 | -37.508 | 1.00 | 45.83 | N |
| ATOM | 1999 | N   | HIS | C | 258 | -16.107 | 32.373 | -38.389 | 1.00 | 40.83 | N |
| ATOM | 2000 | CA  | HIS | C | 258 | -16.181 | 33.253 | -37.241 | 1.00 | 39.94 | C |
| ATOM | 2001 | C   | HIS | C | 258 | -15.017 | 34.239 | -37.351 | 1.00 | 40.09 | C |
| ATOM | 2002 | O   | HIS | C | 258 | -14.130 | 33.992 | -38.121 | 1.00 | 35.44 | O |
| ATOM | 2003 | CB  | HIS | C | 258 | -16.120 | 32.441 | -35.941 | 1.00 | 44.21 | C |
| ATOM | 2004 | CG  | HIS | C | 258 | -14.727 | 32.084 | -35.543 | 1.00 | 47.53 | C |
| ATOM | 2005 | CD2 | HIS | C | 258 | -13.875 | 32.674 | -34.669 | 1.00 | 48.67 | C |
| ATOM | 2006 | ND1 | HIS | C | 258 | -14.042 | 31.023 | -36.116 | 1.00 | 50.08 | N |
| ATOM | 2007 | CE1 | HIS | C | 258 | -12.826 | 30.967 | -35.599 | 1.00 | 52.76 | C |
| ATOM | 2008 | NE2 | HIS | C | 258 | -12.697 | 31.973 | -34.702 | 1.00 | 48.92 | N |
| ATOM | 2009 | N   | THR | C | 259 | -15.026 | 35.349 | -36.599 | 1.00 | 41.74 | N |
| ATOM | 2010 | CA  | THR | C | 259 | -13.901 | 36.298 | -36.698 | 1.00 | 44.84 | C |
| ATOM | 2011 | C   | THR | C | 259 | -12.740 | 35.822 | -35.813 | 1.00 | 45.21 | C |
| ATOM | 2012 | O   | THR | C | 259 | -12.869 | 35.708 | -34.597 | 1.00 | 50.39 | O |
| ATOM | 2013 | CB  | THR | C | 259 | -14.307 | 37.728 | -36.327 | 1.00 | 44.05 | C |
| ATOM | 2014 | CG2 | THR | C | 259 | -13.133 | 38.671 | -36.415 | 1.00 | 41.57 | C |
| ATOM | 2015 | OG1 | THR | C | 259 | -15.352 | 38.214 | -37.175 | 1.00 | 43.17 | O |
| ATOM | 2016 | N   | VAL | C | 260 | -11.592 | 35.553 | -36.430 | 1.00 | 47.73 | N |
| ATOM | 2017 | CA  | VAL | C | 260 | -10.442 | 35.091 | -35.674 | 1.00 | 49.75 | C |
| ATOM | 2018 | C   | VAL | C | 260 | -9.744  | 36.270 | -34.998 | 1.00 | 53.86 | C |
| ATOM | 2019 | O   | VAL | C | 260 | -9.649  | 37.371 | -35.551 | 1.00 | 51.49 | O |

|      |      |     |     |   |     |         |        |         |      |       |   |
|------|------|-----|-----|---|-----|---------|--------|---------|------|-------|---|
| ATOM | 2020 | CB  | VAL | C | 260 | -9.433  | 34.303 | -36.524 | 1.00 | 46.68 | C |
| ATOM | 2021 | CG1 | VAL | C | 260 | -10.070 | 33.059 | -37.127 | 1.00 | 47.33 | C |
| ATOM | 2022 | CG2 | VAL | C | 260 | -8.762  | 35.177 | -37.567 | 1.00 | 48.21 | C |
| ATOM | 2023 | N   | PRO | C | 261 | -9.148  | 36.014 | -33.812 | 1.00 | 49.37 | N |
| ATOM | 2024 | CA  | PRO | C | 261 | -8.466  | 37.052 | -33.047 | 1.00 | 44.91 | C |
| ATOM | 2025 | C   | PRO | C | 261 | -7.100  | 37.364 | -33.670 | 1.00 | 41.53 | C |
| ATOM | 2026 | O   | PRO | C | 261 | -6.082  | 36.800 | -33.259 | 1.00 | 40.66 | O |
| ATOM | 2027 | CB  | PRO | C | 261 | -8.340  | 36.384 | -31.672 | 1.00 | 48.64 | C |
| ATOM | 2028 | CG  | PRO | C | 261 | -8.138  | 34.913 | -32.007 | 1.00 | 46.57 | C |
| ATOM | 2029 | CD  | PRO | C | 261 | -9.069  | 34.685 | -33.180 | 1.00 | 45.94 | C |
| ATOM | 2030 | N   | SER | C | 262 | -7.103  | 38.257 | -34.663 | 1.00 | 37.73 | N |
| ATOM | 2031 | CA  | SER | C | 262 | -5.916  | 38.530 | -35.468 | 1.00 | 37.65 | C |
| ATOM | 2032 | C   | SER | C | 262 | -4.724  | 38.917 | -34.577 | 1.00 | 38.64 | C |
| ATOM | 2033 | O   | SER | C | 262 | -3.602  | 38.497 | -34.848 | 1.00 | 45.34 | O |
| ATOM | 2034 | CB  | SER | C | 262 | -6.189  | 39.571 | -36.546 | 1.00 | 38.61 | C |
| ATOM | 2035 | OG  | SER | C | 262 | -6.859  | 40.719 | -36.028 | 1.00 | 38.12 | O |
| ATOM | 2036 | N   | ASN | C | 263 | -4.959  | 39.694 | -33.510 | 1.00 | 36.18 | N |
| ATOM | 2037 | CA  | ASN | C | 263 | -3.872  | 40.109 | -32.607 | 1.00 | 37.36 | C |
| ATOM | 2038 | C   | ASN | C | 263 | -3.188  | 38.896 | -31.917 | 1.00 | 38.33 | C |
| ATOM | 2039 | O   | ASN | C | 263 | -1.941  | 38.838 | -31.826 | 1.00 | 35.78 | O |
| ATOM | 2040 | CB  | ASN | C | 263 | -4.372  | 41.135 | -31.596 | 1.00 | 38.95 | C |
| ATOM | 2041 | CG  | ASN | C | 263 | -5.175  | 42.241 | -32.247 | 1.00 | 42.91 | C |
| ATOM | 2042 | ND2 | ASN | C | 263 | -4.490  | 43.317 | -32.623 | 1.00 | 35.99 | N |
| ATOM | 2043 | OD1 | ASN | C | 263 | -6.402  | 42.118 | -32.389 | 1.00 | 38.95 | O |
| ATOM | 2044 | N   | LEU | C | 264 | -3.970  | 37.940 | -31.394 | 1.00 | 35.33 | N |
| ATOM | 2045 | CA  | LEU | C | 264 | -3.407  | 36.777 | -30.730 | 1.00 | 33.65 | C |
| ATOM | 2046 | C   | LEU | C | 264 | -2.643  | 35.902 | -31.736 | 1.00 | 36.77 | C |
| ATOM | 2047 | O   | LEU | C | 264 | -1.576  | 35.336 | -31.384 | 1.00 | 38.20 | O |
| ATOM | 2048 | CB  | LEU | C | 264 | -4.531  | 35.994 | -30.059 | 1.00 | 35.83 | C |
| ATOM | 2049 | CG  | LEU | C | 264 | -5.308  | 36.757 | -28.980 | 1.00 | 38.37 | C |
| ATOM | 2050 | CD1 | LEU | C | 264 | -6.285  | 35.824 | -28.281 | 1.00 | 37.76 | C |
| ATOM | 2051 | CD2 | LEU | C | 264 | -4.372  | 37.397 | -27.961 | 1.00 | 35.89 | C |
| ATOM | 2052 | N   | ILE | C | 265 | -3.136  | 35.839 | -32.984 | 1.00 | 36.44 | N |

|      |      |     |     |   |     |        |        |         |      |       |   |
|------|------|-----|-----|---|-----|--------|--------|---------|------|-------|---|
| ATOM | 2053 | CA  | ILE | C | 265 | -2.498 | 35.038 | -34.064 | 1.00 | 36.41 | C |
| ATOM | 2054 | C   | ILE | C | 265 | -1.137 | 35.664 | -34.434 | 1.00 | 38.88 | C |
| ATOM | 2055 | O   | ILE | C | 265 | -0.150 | 34.943 | -34.682 | 1.00 | 39.28 | O |
| ATOM | 2056 | CB  | ILE | C | 265 | -3.453 | 34.911 | -35.266 | 1.00 | 33.21 | C |
| ATOM | 2057 | CG1 | ILE | C | 265 | -4.662 | 34.046 | -34.927 | 1.00 | 34.90 | C |
| ATOM | 2058 | CG2 | ILE | C | 265 | -2.737 | 34.387 | -36.480 | 1.00 | 35.66 | C |
| ATOM | 2059 | CD1 | ILE | C | 265 | -5.798 | 34.158 | -35.939 | 1.00 | 34.75 | C |
| ATOM | 2060 | N   | PHE | C | 266 | -1.073 | 37.003 | -34.501 | 1.00 | 41.51 | N |
| ATOM | 2061 | CA  | PHE | C | 266 | 0.205  | 37.704 | -34.764 | 1.00 | 44.61 | C |
| ATOM | 2062 | C   | PHE | C | 266 | 1.253  | 37.355 | -33.694 | 1.00 | 37.82 | C |
| ATOM | 2063 | O   | PHE | C | 266 | 2.396  | 37.114 | -34.011 | 1.00 | 40.53 | O |
| ATOM | 2064 | CB  | PHE | C | 266 | 0.049  | 39.228 | -34.756 | 1.00 | 45.72 | C |
| ATOM | 2065 | CG  | PHE | C | 266 | -0.926 | 39.808 | -35.745 | 1.00 | 46.86 | C |
| ATOM | 2066 | CD1 | PHE | C | 266 | -1.141 | 39.213 | -36.983 | 1.00 | 47.99 | C |
| ATOM | 2067 | CD2 | PHE | C | 266 | -1.594 | 40.996 | -35.456 | 1.00 | 43.04 | C |
| ATOM | 2068 | CE1 | PHE | C | 266 | -2.032 | 39.777 | -37.890 | 1.00 | 46.41 | C |
| ATOM | 2069 | CE2 | PHE | C | 266 | -2.481 | 41.556 | -36.366 | 1.00 | 41.66 | C |
| ATOM | 2070 | CZ  | PHE | C | 266 | -2.704 | 40.943 | -37.579 | 1.00 | 42.47 | C |
| ATOM | 2071 | N   | ALA | C | 267 | 0.844  | 37.371 | -32.423 | 1.00 | 38.57 | N |
| ATOM | 2072 | CA  | ALA | C | 267 | 1.712  | 37.016 | -31.248 | 1.00 | 36.42 | C |
| ATOM | 2073 | C   | ALA | C | 267 | 2.140  | 35.537 | -31.305 | 1.00 | 32.97 | C |
| ATOM | 2074 | O   | ALA | C | 267 | 3.307  | 35.228 | -31.056 | 1.00 | 27.83 | O |
| ATOM | 2075 | CB  | ALA | C | 267 | 0.987  | 37.345 | -29.963 | 1.00 | 34.63 | C |
| ATOM | 2076 | N   | LEU | C | 268 | 1.201  | 34.640 | -31.653 | 1.00 | 32.39 | N |
| ATOM | 2077 | CA  | LEU | C | 268 | 1.518  | 33.218 | -31.818 | 1.00 | 32.89 | C |
| ATOM | 2078 | C   | LEU | C | 268 | 2.579  | 33.078 | -32.912 | 1.00 | 33.82 | C |
| ATOM | 2079 | O   | LEU | C | 268 | 3.588  | 32.460 | -32.676 | 1.00 | 36.54 | O |
| ATOM | 2080 | CB  | LEU | C | 268 | 0.250  | 32.414 | -32.138 | 1.00 | 35.27 | C |
| ATOM | 2081 | CG  | LEU | C | 268 | 0.402  | 30.880 | -32.203 | 1.00 | 35.52 | C |
| ATOM | 2082 | CD1 | LEU | C | 268 | 0.774  | 30.297 | -30.860 | 1.00 | 32.68 | C |
| ATOM | 2083 | CD2 | LEU | C | 268 | -0.872 | 30.212 | -32.679 | 1.00 | 34.26 | C |
| ATOM | 2084 | N   | ARG | C | 269 | 2.392  | 33.738 | -34.068 | 1.00 | 36.35 | N |
| ATOM | 2085 | CA  | ARG | C | 269 | 3.337  | 33.640 | -35.173 | 1.00 | 32.27 | C |

|      |      |     |     |   |     |       |        |         |      |       |     |
|------|------|-----|-----|---|-----|-------|--------|---------|------|-------|-----|
| ATOM | 2086 | C   | ARG | C | 269 | 4.759 | 33.975 | -34.706 | 1.00 | 34.17 | C   |
| ATOM | 2087 | O   | ARG | C | 269 | 5.753 | 33.265 | -35.083 | 1.00 | 38.43 | O   |
| ATOM | 2088 | CB  | ARG | C | 269 | 2.954 | 34.551 | -36.337 | 1.00 | 33.44 | C   |
| ATOM | 2089 | CG  | ARG | C | 269 | 3.819 | 34.360 | -37.588 | 1.00 | 33.64 | C   |
| ATOM | 2090 | CD  | ARG | C | 269 | 5.042 | 35.253 | -37.656 | 1.00 | 33.35 | C   |
| ATOM | 2091 | NE  | ARG | C | 269 | 5.646 | 35.240 | -38.969 | 1.00 | 38.37 | N   |
| ATOM | 2092 | CZ  | ARG | C | 269 | 6.864 | 35.716 | -39.278 | 1.00 | 43.62 | C   |
| ATOM | 2093 | NH1 | ARG | C | 269 | 7.586 | 36.386 | -38.395 | 1.00 | 40.23 | N1+ |
| ATOM | 2094 | NH2 | ARG | C | 269 | 7.362 | 35.514 | -40.485 | 1.00 | 39.41 | N   |
| ATOM | 2095 | N   | GLU | C | 270 | 4.888 | 35.059 | -33.940 | 1.00 | 30.78 | N   |
| ATOM | 2096 | CA  | GLU | C | 270 | 6.212 | 35.509 | -33.465 | 1.00 | 32.80 | C   |
| ATOM | 2097 | C   | GLU | C | 270 | 6.782 | 34.524 | -32.421 | 1.00 | 37.29 | C   |
| ATOM | 2098 | O   | GLU | C | 270 | 8.006 | 34.298 | -32.322 | 1.00 | 37.84 | O   |
| ATOM | 2099 | CB  | GLU | C | 270 | 6.058 | 36.928 | -32.929 | 1.00 | 34.18 | C   |
| ATOM | 2100 | CG  | GLU | C | 270 | 5.702 | 37.955 | -34.011 | 1.00 | 36.12 | C   |
| ATOM | 2101 | CD  | GLU | C | 270 | 6.913 | 38.329 | -34.859 | 1.00 | 40.53 | C   |
| ATOM | 2102 | OE1 | GLU | C | 270 | 7.543 | 39.384 | -34.587 | 1.00 | 40.05 | O   |
| ATOM | 2103 | OE2 | GLU | C | 270 | 7.286 | 37.514 | -35.735 | 1.00 | 42.59 | O1- |
| ATOM | 2104 | N   | ALA | C | 271 | 5.890 | 33.893 | -31.646 | 1.00 | 39.62 | N   |
| ATOM | 2105 | CA  | ALA | C | 271 | 6.285 | 32.914 | -30.639 | 1.00 | 40.06 | C   |
| ATOM | 2106 | C   | ALA | C | 271 | 6.909 | 31.691 | -31.321 | 1.00 | 34.93 | C   |
| ATOM | 2107 | O   | ALA | C | 271 | 8.014 | 31.258 | -30.981 | 1.00 | 33.25 | O   |
| ATOM | 2108 | CB  | ALA | C | 271 | 5.085 | 32.536 | -29.785 | 1.00 | 43.81 | C   |
| ATOM | 2109 | N   | ILE | C | 272 | 6.228 | 31.181 | -32.344 | 1.00 | 32.93 | N   |
| ATOM | 2110 | CA  | ILE | C | 272 | 6.759 | 30.039 | -33.094 | 1.00 | 36.28 | C   |
| ATOM | 2111 | C   | ILE | C | 272 | 8.064 | 30.401 | -33.851 | 1.00 | 36.06 | C   |
| ATOM | 2112 | O   | ILE | C | 272 | 9.016 | 29.593 | -33.898 | 1.00 | 37.48 | O   |
| ATOM | 2113 | CB  | ILE | C | 272 | 5.667 | 29.466 | -34.012 | 1.00 | 36.98 | C   |
| ATOM | 2114 | CG1 | ILE | C | 272 | 4.421 | 29.076 | -33.219 | 1.00 | 38.01 | C   |
| ATOM | 2115 | CG2 | ILE | C | 272 | 6.194 | 28.277 | -34.789 | 1.00 | 38.49 | C   |
| ATOM | 2116 | CD1 | ILE | C | 272 | 3.257 | 28.707 | -34.102 | 1.00 | 41.82 | C   |
| ATOM | 2117 | N   | ALA | C | 273 | 8.135 | 31.599 | -34.434 | 1.00 | 33.10 | N   |
| ATOM | 2118 | CA  | ALA | C | 273 | 9.323 | 32.047 | -35.129 | 1.00 | 34.71 | C   |

|      |      |     |     |   |     |        |        |         |      |       |   |
|------|------|-----|-----|---|-----|--------|--------|---------|------|-------|---|
| ATOM | 2119 | C   | ALA | C | 273 | 10.563 | 32.038 | -34.239 | 1.00 | 36.12 | C |
| ATOM | 2120 | O   | ALA | C | 273 | 11.660 | 31.736 | -34.712 | 1.00 | 40.58 | O |
| ATOM | 2121 | CB  | ALA | C | 273 | 9.095  | 33.433 | -35.646 | 1.00 | 39.53 | C |
| ATOM | 2122 | N   | GLN | C | 274 | 10.396 | 32.443 | -32.981 | 1.00 | 39.80 | N |
| ATOM | 2123 | CA  | GLN | C | 274 | 11.484 | 32.441 | -31.969 | 1.00 | 41.62 | C |
| ATOM | 2124 | C   | GLN | C | 274 | 12.091 | 31.034 | -31.871 | 1.00 | 41.38 | C |
| ATOM | 2125 | O   | GLN | C | 274 | 13.309 | 30.863 | -31.755 | 1.00 | 44.62 | O |
| ATOM | 2126 | CB  | GLN | C | 274 | 10.960 | 32.907 | -30.598 | 1.00 | 44.14 | C |
| ATOM | 2127 | CG  | GLN | C | 274 | 11.171 | 34.385 | -30.297 | 1.00 | 43.97 | C |
| ATOM | 2128 | CD  | GLN | C | 274 | 10.209 | 35.027 | -29.315 | 1.00 | 47.46 | C |
| ATOM | 2129 | NE2 | GLN | C | 274 | 10.482 | 36.305 | -29.056 | 1.00 | 39.35 | N |
| ATOM | 2130 | OE1 | GLN | C | 274 | 9.250  | 34.404 | -28.801 | 1.00 | 41.91 | O |
| ATOM | 2131 | N   | ILE | C | 275 | 11.224 | 30.022 | -31.898 | 1.00 | 44.21 | N |
| ATOM | 2132 | CA  | ILE | C | 275 | 11.643 | 28.641 | -31.778 | 1.00 | 43.05 | C |
| ATOM | 2133 | C   | ILE | C | 275 | 12.306 | 28.162 | -33.081 | 1.00 | 43.44 | C |
| ATOM | 2134 | O   | ILE | C | 275 | 13.298 | 27.425 | -33.011 | 1.00 | 39.37 | O |
| ATOM | 2135 | CB  | ILE | C | 275 | 10.444 | 27.792 | -31.339 | 1.00 | 43.16 | C |
| ATOM | 2136 | CG1 | ILE | C | 275 | 10.038 | 28.207 | -29.924 | 1.00 | 46.59 | C |
| ATOM | 2137 | CG2 | ILE | C | 275 | 10.749 | 26.302 | -31.435 | 1.00 | 42.71 | C |
| ATOM | 2138 | CD1 | ILE | C | 275 | 8.747  | 27.578 | -29.448 | 1.00 | 52.19 | C |
| ATOM | 2139 | N   | ALA | C | 276 | 11.801 | 28.601 | -34.248 | 1.00 | 42.13 | N |
| ATOM | 2140 | CA  | ALA | C | 276 | 12.456 | 28.294 | -35.548 | 1.00 | 47.96 | C |
| ATOM | 2141 | C   | ALA | C | 276 | 13.851 | 28.930 | -35.640 | 1.00 | 54.33 | C |
| ATOM | 2142 | O   | ALA | C | 276 | 14.753 | 28.371 | -36.265 | 1.00 | 63.15 | O |
| ATOM | 2143 | CB  | ALA | C | 276 | 11.603 | 28.739 | -36.703 | 1.00 | 48.14 | C |
| ATOM | 2144 | N   | GLU | C | 277 | 14.033 | 30.105 | -35.028 | 1.00 | 54.66 | N |
| ATOM | 2145 | CA  | GLU | C | 277 | 15.296 | 30.811 | -35.138 | 1.00 | 56.21 | C |
| ATOM | 2146 | C   | GLU | C | 277 | 16.383 | 30.071 | -34.343 | 1.00 | 54.21 | C |
| ATOM | 2147 | O   | GLU | C | 277 | 17.473 | 29.854 | -34.854 | 1.00 | 47.86 | O |
| ATOM | 2148 | CB  | GLU | C | 277 | 15.126 | 32.268 | -34.703 | 1.00 | 61.02 | C |
| ATOM | 2149 | CG  | GLU | C | 277 | 14.535 | 33.153 | -35.788 | 1.00 | 62.66 | C |
| ATOM | 2150 | CD  | GLU | C | 277 | 13.793 | 34.398 | -35.313 | 1.00 | 68.66 | C |
| ATOM | 2151 | OE1 | GLU | C | 277 | 13.909 | 34.758 | -34.102 | 1.00 | 75.85 | O |

|      |      |     |     |   |     |        |        |         |      |       |     |
|------|------|-----|-----|---|-----|--------|--------|---------|------|-------|-----|
| ATOM | 2152 | OE2 | GLU | C | 277 | 13.085 | 35.010 | -36.153 | 1.00 | 61.96 | 01- |
| ATOM | 2153 | N   | GLU | C | 278 | 16.090 | 29.682 | -33.093 | 1.00 | 50.84 | N   |
| ATOM | 2154 | CA  | GLU | C | 278 | 17.115 | 29.086 | -32.232 | 1.00 | 48.20 | C   |
| ATOM | 2155 | C   | GLU | C | 278 | 17.285 | 27.598 | -32.563 | 1.00 | 50.89 | C   |
| ATOM | 2156 | O   | GLU | C | 278 | 18.422 | 27.087 | -32.506 | 1.00 | 52.83 | O   |
| ATOM | 2157 | CB  | GLU | C | 278 | 16.804 | 29.261 | -30.751 | 1.00 | 50.24 | C   |
| ATOM | 2158 | CG  | GLU | C | 278 | 17.991 | 28.929 | -29.868 | 1.00 | 54.75 | C   |
| ATOM | 2159 | CD  | GLU | C | 278 | 17.630 | 28.818 | -28.399 | 1.00 | 65.37 | C   |
| ATOM | 2160 | OE1 | GLU | C | 278 | 16.540 | 29.322 | -28.030 | 1.00 | 71.91 | O   |
| ATOM | 2161 | OE2 | GLU | C | 278 | 18.422 | 28.218 | -27.624 | 1.00 | 70.90 | 01- |
| ATOM | 2162 | N   | GLY | C | 279 | 16.167 | 26.931 | -32.890 | 1.00 | 44.77 | N   |
| ATOM | 2163 | CA  | GLY | C | 279 | 16.124 | 25.526 | -33.219 | 1.00 | 43.51 | C   |
| ATOM | 2164 | C   | GLY | C | 279 | 15.340 | 24.754 | -32.174 | 1.00 | 46.26 | C   |
| ATOM | 2165 | O   | GLY | C | 279 | 15.620 | 24.898 | -30.993 | 1.00 | 50.08 | O   |
| ATOM | 2166 | N   | LEU | C | 280 | 14.377 | 23.921 | -32.607 | 1.00 | 45.49 | N   |
| ATOM | 2167 | CA  | LEU | C | 280 | 13.568 | 23.072 | -31.670 | 1.00 | 47.15 | C   |
| ATOM | 2168 | C   | LEU | C | 280 | 14.461 | 22.272 | -30.693 | 1.00 | 44.94 | C   |
| ATOM | 2169 | O   | LEU | C | 280 | 14.136 | 22.098 | -29.542 | 1.00 | 39.52 | O   |
| ATOM | 2170 | CB  | LEU | C | 280 | 12.692 | 22.123 | -32.489 | 1.00 | 43.97 | C   |
| ATOM | 2171 | CG  | LEU | C | 280 | 11.244 | 22.034 | -32.026 | 1.00 | 50.24 | C   |
| ATOM | 2172 | CD1 | LEU | C | 280 | 10.567 | 20.798 | -32.598 | 1.00 | 54.85 | C   |
| ATOM | 2173 | CD2 | LEU | C | 280 | 11.141 | 22.028 | -30.514 | 1.00 | 48.92 | C   |
| ATOM | 2174 | N   | GLU | C | 281 | 15.600 | 21.774 | -31.182 | 1.00 | 50.88 | N   |
| ATOM | 2175 | CA  | GLU | C | 281 | 16.466 | 20.869 | -30.426 | 1.00 | 55.22 | C   |
| ATOM | 2176 | C   | GLU | C | 281 | 17.151 | 21.655 | -29.315 | 1.00 | 49.15 | C   |
| ATOM | 2177 | O   | GLU | C | 281 | 16.976 | 21.302 | -28.151 | 1.00 | 47.90 | O   |
| ATOM | 2178 | CB  | GLU | C | 281 | 17.438 | 20.140 | -31.364 | 1.00 | 58.34 | C   |
| ATOM | 2179 | CG  | GLU | C | 281 | 18.491 | 19.298 | -30.657 | 1.00 | 61.90 | C   |
| ATOM | 2180 | CD  | GLU | C | 281 | 19.069 | 18.153 | -31.487 | 1.00 | 68.15 | C   |
| ATOM | 2181 | OE1 | GLU | C | 281 | 20.151 | 17.642 | -31.117 | 1.00 | 66.50 | O   |
| ATOM | 2182 | OE2 | GLU | C | 281 | 18.425 | 17.752 | -32.492 | 1.00 | 68.09 | 01- |
| ATOM | 2183 | N   | PRO | C | 282 | 17.922 | 22.729 | -29.623 | 1.00 | 44.51 | N   |
| ATOM | 2184 | CA  | PRO | C | 282 | 18.496 | 23.586 | -28.579 | 1.00 | 43.80 | C   |



|      |      |     |     |   |     |        |        |         |      |       |     |
|------|------|-----|-----|---|-----|--------|--------|---------|------|-------|-----|
| ATOM | 2185 | C   | PRO | C | 282 | 17.465 | 24.137 | -27.569 | 1.00 | 44.79 | C   |
| ATOM | 2186 | O   | PRO | C | 282 | 17.703 | 24.215 | -26.347 | 1.00 | 42.89 | O   |
| ATOM | 2187 | CB  | PRO | C | 282 | 19.105 | 24.751 | -29.376 | 1.00 | 43.79 | C   |
| ATOM | 2188 | CG  | PRO | C | 282 | 19.351 | 24.211 | -30.763 | 1.00 | 39.84 | C   |
| ATOM | 2189 | CD  | PRO | C | 282 | 18.272 | 23.177 | -30.979 | 1.00 | 40.73 | C   |
| ATOM | 2190 | N   | VAL | C | 283 | 16.291 | 24.508 | -28.072 | 1.00 | 46.62 | N   |
| ATOM | 2191 | CA  | VAL | C | 283 | 15.234 | 25.066 | -27.229 | 1.00 | 51.39 | C   |
| ATOM | 2192 | C   | VAL | C | 283 | 14.761 | 24.020 | -26.207 | 1.00 | 51.78 | C   |
| ATOM | 2193 | O   | VAL | C | 283 | 14.428 | 24.356 | -25.078 | 1.00 | 53.91 | O   |
| ATOM | 2194 | CB  | VAL | C | 283 | 14.089 | 25.595 | -28.110 | 1.00 | 50.41 | C   |
| ATOM | 2195 | CG1 | VAL | C | 283 | 12.779 | 25.725 | -27.348 | 1.00 | 52.02 | C   |
| ATOM | 2196 | CG2 | VAL | C | 283 | 14.499 | 26.906 | -28.763 | 1.00 | 47.88 | C   |
| ATOM | 2197 | N   | ILE | C | 284 | 14.689 | 22.754 | -26.628 | 1.00 | 53.14 | N   |
| ATOM | 2198 | CA  | ILE | C | 284 | 14.337 | 21.653 | -25.737 | 1.00 | 49.50 | C   |
| ATOM | 2199 | C   | ILE | C | 284 | 15.505 | 21.369 | -24.778 | 1.00 | 47.56 | C   |
| ATOM | 2200 | O   | ILE | C | 284 | 15.309 | 21.246 | -23.576 | 1.00 | 45.74 | O   |
| ATOM | 2201 | CB  | ILE | C | 284 | 13.931 | 20.418 | -26.551 | 1.00 | 49.40 | C   |
| ATOM | 2202 | CG1 | ILE | C | 284 | 12.574 | 20.616 | -27.225 | 1.00 | 52.89 | C   |
| ATOM | 2203 | CG2 | ILE | C | 284 | 13.943 | 19.184 | -25.672 | 1.00 | 51.97 | C   |
| ATOM | 2204 | CD1 | ILE | C | 284 | 12.174 | 19.486 | -28.175 | 1.00 | 54.00 | C   |
| ATOM | 2205 | N   | ARG | C | 285 | 16.728 | 21.302 | -25.310 | 1.00 | 55.80 | N   |
| ATOM | 2206 | CA  | ARG | C | 285 | 17.942 | 21.060 | -24.493 | 1.00 | 60.31 | C   |
| ATOM | 2207 | C   | ARG | C | 285 | 18.080 | 22.119 | -23.391 | 1.00 | 61.20 | C   |
| ATOM | 2208 | O   | ARG | C | 285 | 18.511 | 21.766 | -22.288 | 1.00 | 62.54 | O   |
| ATOM | 2209 | CB  | ARG | C | 285 | 19.225 | 21.064 | -25.333 | 1.00 | 65.26 | C   |
| ATOM | 2210 | CG  | ARG | C | 285 | 19.379 | 19.867 | -26.258 | 1.00 | 72.45 | C   |
| ATOM | 2211 | CD  | ARG | C | 285 | 20.789 | 19.725 | -26.797 | 1.00 | 74.63 | C   |
| ATOM | 2212 | NE  | ARG | C | 285 | 20.868 | 18.597 | -27.716 | 1.00 | 78.60 | N   |
| ATOM | 2213 | CZ  | ARG | C | 285 | 20.726 | 17.321 | -27.363 | 1.00 | 78.88 | C   |
| ATOM | 2214 | NH1 | ARG | C | 285 | 20.523 | 16.988 | -26.098 | 1.00 | 69.08 | N1+ |
| ATOM | 2215 | NH2 | ARG | C | 285 | 20.786 | 16.378 | -28.281 | 1.00 | 77.40 | N   |
| ATOM | 2216 | N   | ARG | C | 286 | 17.757 | 23.394 | -23.699 | 1.00 | 60.75 | N   |
| ATOM | 2217 | CA  | ARG | C | 286 | 17.900 | 24.479 | -22.726 | 1.00 | 59.51 | C   |

|      |      |     |     |   |     |        |        |         |      |       |     |
|------|------|-----|-----|---|-----|--------|--------|---------|------|-------|-----|
| ATOM | 2218 | C   | ARG | C | 286 | 16.899 | 24.250 | -21.585 | 1.00 | 53.19 | C   |
| ATOM | 2219 | O   | ARG | C | 286 | 17.258 | 24.456 | -20.422 | 1.00 | 52.18 | O   |
| ATOM | 2220 | CB  | ARG | C | 286 | 17.785 | 25.882 | -23.344 | 1.00 | 65.20 | C   |
| ATOM | 2221 | CG  | ARG | C | 286 | 17.976 | 27.014 | -22.332 | 1.00 | 74.14 | C   |
| ATOM | 2222 | CD  | ARG | C | 286 | 18.428 | 28.382 | -22.833 | 1.00 | 74.20 | C   |
| ATOM | 2223 | NE  | ARG | C | 286 | 17.921 | 28.676 | -24.168 | 1.00 | 79.78 | N   |
| ATOM | 2224 | CZ  | ARG | C | 286 | 16.676 | 29.046 | -24.449 | 1.00 | 72.24 | C   |
| ATOM | 2225 | NH1 | ARG | C | 286 | 15.879 | 29.504 | -23.499 | 1.00 | 76.04 | N1+ |
| ATOM | 2226 | NH2 | ARG | C | 286 | 16.234 | 28.950 | -25.688 | 1.00 | 67.08 | N   |
| ATOM | 2227 | N   | ARG | C | 287 | 15.690 | 23.773 | -21.908 | 1.00 | 53.38 | N   |
| ATOM | 2228 | CA  | ARG | C | 287 | 14.657 | 23.475 | -20.892 | 1.00 | 56.35 | C   |
| ATOM | 2229 | C   | ARG | C | 287 | 15.035 | 22.257 | -20.035 | 1.00 | 56.74 | C   |
| ATOM | 2230 | O   | ARG | C | 287 | 14.842 | 22.296 | -18.824 | 1.00 | 52.50 | O   |
| ATOM | 2231 | CB  | ARG | C | 287 | 13.283 | 23.248 | -21.524 | 1.00 | 55.69 | C   |
| ATOM | 2232 | CG  | ARG | C | 287 | 12.336 | 24.417 | -21.315 | 1.00 | 60.39 | C   |
| ATOM | 2233 | CD  | ARG | C | 287 | 11.583 | 24.827 | -22.562 | 1.00 | 62.66 | C   |
| ATOM | 2234 | NE  | ARG | C | 287 | 11.308 | 26.250 | -22.511 | 1.00 | 64.20 | N   |
| ATOM | 2235 | CZ  | ARG | C | 287 | 11.138 | 26.990 | -23.585 | 1.00 | 65.77 | C   |
| ATOM | 2236 | NH1 | ARG | C | 287 | 10.861 | 26.384 | -24.726 | 1.00 | 67.82 | N1+ |
| ATOM | 2237 | NH2 | ARG | C | 287 | 11.264 | 28.305 | -23.524 | 1.00 | 60.25 | N   |
| ATOM | 2238 | N   | GLN | C | 288 | 15.550 | 21.188 | -20.663 | 1.00 | 56.88 | N   |
| ATOM | 2239 | CA  | GLN | C | 288 | 16.048 | 20.024 | -19.932 | 1.00 | 52.84 | C   |
| ATOM | 2240 | C   | GLN | C | 288 | 17.122 | 20.513 | -18.947 | 1.00 | 47.45 | C   |
| ATOM | 2241 | O   | GLN | C | 288 | 17.093 | 20.120 | -17.802 | 1.00 | 45.50 | O   |
| ATOM | 2242 | CB  | GLN | C | 288 | 16.527 | 18.910 | -20.883 | 1.00 | 58.21 | C   |
| ATOM | 2243 | CG  | GLN | C | 288 | 15.472 | 17.821 | -21.134 | 1.00 | 73.26 | C   |
| ATOM | 2244 | CD  | GLN | C | 288 | 15.315 | 17.280 | -22.552 | 1.00 | 76.09 | C   |
| ATOM | 2245 | NE2 | GLN | C | 288 | 14.132 | 16.751 | -22.827 | 1.00 | 65.25 | N   |
| ATOM | 2246 | OE1 | GLN | C | 288 | 16.219 | 17.284 | -23.395 | 1.00 | 65.65 | O   |
| ATOM | 2247 | N   | GLU | C | 289 | 18.031 | 21.403 | -19.374 | 1.00 | 45.12 | N   |
| ATOM | 2248 | CA  | GLU | C | 289 | 19.145 | 21.876 | -18.498 | 1.00 | 49.70 | C   |
| ATOM | 2249 | C   | GLU | C | 289 | 18.627 | 22.746 | -17.332 | 1.00 | 46.44 | C   |
| ATOM | 2250 | O   | GLU | C | 289 | 19.135 | 22.651 | -16.211 | 1.00 | 43.19 | O   |

|      |      |     |     |   |     |        |        |         |      |       |     |
|------|------|-----|-----|---|-----|--------|--------|---------|------|-------|-----|
| ATOM | 2251 | CB  | GLU | C | 289 | 20.207 | 22.626 | -19.304 | 1.00 | 58.68 | C   |
| ATOM | 2252 | CG  | GLU | C | 289 | 21.109 | 21.728 | -20.153 | 1.00 | 66.61 | C   |
| ATOM | 2253 | CD  | GLU | C | 289 | 21.981 | 22.467 | -21.170 | 1.00 | 74.50 | C   |
| ATOM | 2254 | OE1 | GLU | C | 289 | 22.616 | 21.792 | -22.033 | 1.00 | 69.66 | O   |
| ATOM | 2255 | OE2 | GLU | C | 289 | 22.031 | 23.727 | -21.103 | 1.00 | 78.62 | O1- |
| ATOM | 2256 | N   | CYS | C | 290 | 17.610 | 23.577 | -17.577 | 1.00 | 38.98 | N   |
| ATOM | 2257 | CA  | CYS | C | 290 | 17.014 | 24.397 | -16.535 | 1.00 | 40.04 | C   |
| ATOM | 2258 | C   | CYS | C | 290 | 16.337 | 23.492 | -15.474 | 1.00 | 40.75 | C   |
| ATOM | 2259 | O   | CYS | C | 290 | 16.317 | 23.789 | -14.267 | 1.00 | 39.14 | O   |
| ATOM | 2260 | CB  | CYS | C | 290 | 16.068 | 25.432 | -17.154 | 1.00 | 41.29 | C   |
| ATOM | 2261 | SG  | CYS | C | 290 | 16.869 | 26.718 | -18.173 | 1.00 | 42.35 | S   |
| ATOM | 2262 | N   | ALA | C | 291 | 15.821 | 22.333 | -15.885 | 1.00 | 35.94 | N   |
| ATOM | 2263 | CA  | ALA | C | 291 | 15.201 | 21.442 | -14.923 | 1.00 | 38.50 | C   |
| ATOM | 2264 | C   | ALA | C | 291 | 16.264 | 20.769 | -14.031 | 1.00 | 41.21 | C   |
| ATOM | 2265 | O   | ALA | C | 291 | 16.059 | 20.611 | -12.804 | 1.00 | 42.16 | O   |
| ATOM | 2266 | CB  | ALA | C | 291 | 14.309 | 20.442 | -15.624 | 1.00 | 36.30 | C   |
| ATOM | 2267 | N   | GLU | C | 292 | 17.375 | 20.350 | -14.642 | 1.00 | 45.24 | N   |
| ATOM | 2268 | CA  | GLU | C | 292 | 18.508 | 19.813 | -13.930 | 1.00 | 51.98 | C   |
| ATOM | 2269 | C   | GLU | C | 292 | 18.863 | 20.781 | -12.791 | 1.00 | 50.91 | C   |
| ATOM | 2270 | O   | GLU | C | 292 | 18.918 | 20.390 | -11.634 | 1.00 | 56.44 | O   |
| ATOM | 2271 | CB  | GLU | C | 292 | 19.735 | 19.650 | -14.837 | 1.00 | 63.80 | C   |
| ATOM | 2272 | CG  | GLU | C | 292 | 19.647 | 18.532 | -15.857 | 1.00 | 70.18 | C   |
| ATOM | 2273 | CD  | GLU | C | 292 | 19.437 | 17.155 | -15.258 | 1.00 | 84.73 | C   |
| ATOM | 2274 | OE1 | GLU | C | 292 | 19.932 | 16.922 | -14.122 | 1.00 | 94.33 | O   |
| ATOM | 2275 | OE2 | GLU | C | 292 | 18.768 | 16.326 | -15.919 | 1.00 | 86.77 | O1- |
| ATOM | 2276 | N   | GLN | C | 293 | 19.084 | 22.054 | -13.136 | 1.00 | 48.77 | N   |
| ATOM | 2277 | CA  | GLN | C | 293 | 19.536 | 23.053 | -12.177 | 1.00 | 44.70 | C   |
| ATOM | 2278 | C   | GLN | C | 293 | 18.482 | 23.176 | -11.076 | 1.00 | 42.08 | C   |
| ATOM | 2279 | O   | GLN | C | 293 | 18.848 | 23.221 | -9.911  | 1.00 | 39.50 | O   |
| ATOM | 2280 | CB  | GLN | C | 293 | 19.821 | 24.382 | -12.880 | 1.00 | 44.64 | C   |
| ATOM | 2281 | CG  | GLN | C | 293 | 20.313 | 25.502 | -11.968 | 1.00 | 46.14 | C   |
| ATOM | 2282 | CD  | GLN | C | 293 | 21.712 | 25.279 | -11.452 | 1.00 | 44.08 | C   |
| ATOM | 2283 | NE2 | GLN | C | 293 | 22.300 | 26.334 | -10.911 | 1.00 | 40.25 | N   |

|      |      |     |     |   |     |        |        |         |      |       |     |
|------|------|-----|-----|---|-----|--------|--------|---------|------|-------|-----|
| ATOM | 2284 | OE1 | GLN | C | 293 | 22.250 | 24.178 | -11.527 | 1.00 | 42.57 | O   |
| ATOM | 2285 | N   | MET | C | 294 | 17.198 | 23.210 | -11.466 | 1.00 | 42.57 | N   |
| ATOM | 2286 | CA  | MET | C | 294 | 16.087 | 23.303 | -10.506 | 1.00 | 43.27 | C   |
| ATOM | 2287 | C   | MET | C | 294 | 16.220 | 22.154 | -9.503  | 1.00 | 45.71 | C   |
| ATOM | 2288 | O   | MET | C | 294 | 16.093 | 22.390 | -8.310  | 1.00 | 41.72 | O   |
| ATOM | 2289 | CB  | MET | C | 294 | 14.711 | 23.233 | -11.182 | 1.00 | 39.38 | C   |
| ATOM | 2290 | CG  | MET | C | 294 | 13.536 | 23.328 | -10.195 | 1.00 | 41.60 | C   |
| ATOM | 2291 | SD  | MET | C | 294 | 13.290 | 24.978 | -9.424  | 1.00 | 46.74 | S   |
| ATOM | 2292 | CE  | MET | C | 294 | 12.554 | 25.869 | -10.786 | 1.00 | 44.21 | C   |
| ATOM | 2293 | N   | TYR | C | 295 | 16.487 | 20.940 | -10.025 | 1.00 | 49.00 | N   |
| ATOM | 2294 | CA  | TYR | C | 295 | 16.553 | 19.685 | -9.244  | 1.00 | 46.85 | C   |
| ATOM | 2295 | C   | TYR | C | 295 | 17.695 | 19.762 | -8.225  | 1.00 | 44.07 | C   |
| ATOM | 2296 | O   | TYR | C | 295 | 17.505 | 19.407 | -7.050  | 1.00 | 44.99 | O   |
| ATOM | 2297 | CB  | TYR | C | 295 | 16.725 | 18.451 | -10.139 | 1.00 | 44.78 | C   |
| ATOM | 2298 | CG  | TYR | C | 295 | 15.605 | 18.185 | -11.117 | 1.00 | 46.07 | C   |
| ATOM | 2299 | CD1 | TYR | C | 295 | 14.302 | 18.550 | -10.816 | 1.00 | 44.48 | C   |
| ATOM | 2300 | CD2 | TYR | C | 295 | 15.834 | 17.529 | -12.327 | 1.00 | 43.41 | C   |
| ATOM | 2301 | CE1 | TYR | C | 295 | 13.267 | 18.313 | -11.702 | 1.00 | 46.27 | C   |
| ATOM | 2302 | CE2 | TYR | C | 295 | 14.805 | 17.294 | -13.232 | 1.00 | 42.28 | C   |
| ATOM | 2303 | CZ  | TYR | C | 295 | 13.511 | 17.682 | -12.912 | 1.00 | 45.87 | C   |
| ATOM | 2304 | OH  | TYR | C | 295 | 12.448 | 17.490 | -13.758 | 1.00 | 46.68 | O   |
| ATOM | 2305 | N   | ARG | C | 296 | 18.862 | 20.212 | -8.682  | 1.00 | 40.67 | N   |
| ATOM | 2306 | CA  | ARG | C | 296 | 20.028 | 20.333 | -7.815  | 1.00 | 46.28 | C   |
| ATOM | 2307 | C   | ARG | C | 296 | 19.731 | 21.305 | -6.667  | 1.00 | 46.69 | C   |
| ATOM | 2308 | O   | ARG | C | 296 | 19.969 | 20.983 | -5.506  | 1.00 | 52.05 | O   |
| ATOM | 2309 | CB  | ARG | C | 296 | 21.273 | 20.743 | -8.604  | 1.00 | 46.70 | C   |
| ATOM | 2310 | CG  | ARG | C | 296 | 21.867 | 19.589 | -9.397  | 1.00 | 49.56 | C   |
| ATOM | 2311 | CD  | ARG | C | 296 | 23.278 | 19.893 | -9.813  | 1.00 | 50.08 | C   |
| ATOM | 2312 | NE  | ARG | C | 296 | 23.204 | 20.915 | -10.839 | 1.00 | 56.57 | N   |
| ATOM | 2313 | CZ  | ARG | C | 296 | 22.874 | 20.678 | -12.104 | 1.00 | 56.38 | C   |
| ATOM | 2314 | NH1 | ARG | C | 296 | 22.701 | 19.431 | -12.509 | 1.00 | 49.93 | N1+ |
| ATOM | 2315 | NH2 | ARG | C | 296 | 22.718 | 21.683 | -12.952 | 1.00 | 53.54 | N   |
| ATOM | 2316 | N   | GLY | C | 297 | 19.163 | 22.462 | -6.995  | 1.00 | 45.35 | N   |

|      |      |     |     |   |     |        |        |        |      |       |   |
|------|------|-----|-----|---|-----|--------|--------|--------|------|-------|---|
| ATOM | 2317 | CA  | GLY | C | 297 | 18.854 | 23.484 | -6.015 | 1.00 | 44.11 | C |
| ATOM | 2318 | C   | GLY | C | 297 | 17.840 | 23.015 | -4.990 | 1.00 | 46.81 | C |
| ATOM | 2319 | O   | GLY | C | 297 | 17.907 | 23.398 | -3.817 | 1.00 | 53.92 | O |
| ATOM | 2320 | N   | LEU | C | 298 | 16.877 | 22.207 | -5.433 | 1.00 | 50.35 | N |
| ATOM | 2321 | CA  | LEU | C | 298 | 15.853 | 21.663 | -4.540 | 1.00 | 54.64 | C |
| ATOM | 2322 | C   | LEU | C | 298 | 16.462 | 20.580 | -3.619 | 1.00 | 54.98 | C |
| ATOM | 2323 | O   | LEU | C | 298 | 16.113 | 20.485 | -2.457 | 1.00 | 52.05 | O |
| ATOM | 2324 | CB  | LEU | C | 298 | 14.682 | 21.129 | -5.377 | 1.00 | 51.76 | C |
| ATOM | 2325 | CG  | LEU | C | 298 | 13.718 | 22.190 | -5.922 | 1.00 | 52.90 | C |
| ATOM | 2326 | CD1 | LEU | C | 298 | 12.745 | 21.589 | -6.925 | 1.00 | 49.58 | C |
| ATOM | 2327 | CD2 | LEU | C | 298 | 12.938 | 22.868 | -4.807 | 1.00 | 53.45 | C |
| ATOM | 2328 | N   | GLN | C | 299 | 17.387 | 19.770 | -4.136 | 1.00 | 52.59 | N |
| ATOM | 2329 | CA  | GLN | C | 299 | 18.011 | 18.731 | -3.354 | 1.00 | 53.46 | C |
| ATOM | 2330 | C   | GLN | C | 299 | 18.817 | 19.377 | -2.224 | 1.00 | 56.05 | C |
| ATOM | 2331 | O   | GLN | C | 299 | 18.785 | 18.913 | -1.078 | 1.00 | 51.74 | O |
| ATOM | 2332 | CB  | GLN | C | 299 | 18.900 | 17.898 | -4.265 | 1.00 | 57.48 | C |
| ATOM | 2333 | CG  | GLN | C | 299 | 19.479 | 16.641 | -3.637 | 1.00 | 62.71 | C |
| ATOM | 2334 | CD  | GLN | C | 299 | 20.416 | 16.001 | -4.633 | 1.00 | 70.54 | C |
| ATOM | 2335 | NE2 | GLN | C | 299 | 21.576 | 16.611 | -4.831 | 1.00 | 72.61 | N |
| ATOM | 2336 | OE1 | GLN | C | 299 | 20.070 | 15.025 | -5.292 | 1.00 | 79.52 | O |
| ATOM | 2337 | N   | ALA | C | 300 | 19.505 | 20.476 | -2.566 | 1.00 | 53.33 | N |
| ATOM | 2338 | CA  | ALA | C | 300 | 20.416 | 21.170 | -1.672 | 1.00 | 48.99 | C |
| ATOM | 2339 | C   | ALA | C | 300 | 19.621 | 21.822 | -0.538 | 1.00 | 52.03 | C |
| ATOM | 2340 | O   | ALA | C | 300 | 20.144 | 22.040 | 0.552  | 1.00 | 57.11 | O |
| ATOM | 2341 | CB  | ALA | C | 300 | 21.250 | 22.176 | -2.443 | 1.00 | 43.22 | C |
| ATOM | 2342 | N   | MET | C | 301 | 18.349 | 22.126 | -0.809 | 1.00 | 51.79 | N |
| ATOM | 2343 | CA  | MET | C | 301 | 17.464 | 22.764 | 0.153  | 1.00 | 51.64 | C |
| ATOM | 2344 | C   | MET | C | 301 | 16.666 | 21.726 | 0.959  | 1.00 | 46.08 | C |
| ATOM | 2345 | O   | MET | C | 301 | 15.868 | 22.112 | 1.803  | 1.00 | 43.84 | O |
| ATOM | 2346 | CB  | MET | C | 301 | 16.485 | 23.691 | -0.575 | 1.00 | 58.34 | C |
| ATOM | 2347 | CG  | MET | C | 301 | 17.143 | 24.909 | -1.194 | 1.00 | 59.89 | C |
| ATOM | 2348 | SD  | MET | C | 301 | 15.897 | 25.856 | -2.084 | 1.00 | 61.09 | S |
| ATOM | 2349 | CE  | MET | C | 301 | 14.970 | 26.547 | -0.715 | 1.00 | 63.38 | C |

|      |      |     |     |   |     |        |        |        |      |       |     |
|------|------|-----|-----|---|-----|--------|--------|--------|------|-------|-----|
| ATOM | 2350 | N   | GLY | C | 302 | 16.864 | 20.435 | 0.666  | 1.00 | 42.80 | N   |
| ATOM | 2351 | CA  | GLY | C | 302 | 16.296 | 19.333 | 1.402  | 1.00 | 45.61 | C   |
| ATOM | 2352 | C   | GLY | C | 302 | 14.871 | 19.012 | 0.992  | 1.00 | 52.44 | C   |
| ATOM | 2353 | O   | GLY | C | 302 | 14.252 | 18.162 | 1.581  | 1.00 | 54.76 | O   |
| ATOM | 2354 | N   | LEU | C | 303 | 14.357 | 19.673 | -0.050 | 1.00 | 60.68 | N   |
| ATOM | 2355 | CA  | LEU | C | 303 | 12.924 | 19.577 | -0.443 | 1.00 | 59.15 | C   |
| ATOM | 2356 | C   | LEU | C | 303 | 12.708 | 18.423 | -1.431 | 1.00 | 51.73 | C   |
| ATOM | 2357 | O   | LEU | C | 303 | 13.615 | 18.009 | -2.133 | 1.00 | 50.96 | O   |
| ATOM | 2358 | CB  | LEU | C | 303 | 12.497 | 20.918 | -1.046 | 1.00 | 57.19 | C   |
| ATOM | 2359 | CG  | LEU | C | 303 | 12.486 | 22.075 | -0.054 | 1.00 | 58.62 | C   |
| ATOM | 2360 | CD1 | LEU | C | 303 | 12.555 | 23.426 | -0.758 | 1.00 | 59.54 | C   |
| ATOM | 2361 | CD2 | LEU | C | 303 | 11.259 | 21.972 | 0.829  | 1.00 | 61.59 | C   |
| ATOM | 2362 | N   | GLU | C | 304 | 11.472 | 17.935 | -1.498 | 1.00 | 52.59 | N   |
| ATOM | 2363 | CA  | GLU | C | 304 | 11.151 | 16.783 | -2.325 | 1.00 | 58.94 | C   |
| ATOM | 2364 | C   | GLU | C | 304 | 10.244 | 17.191 | -3.494 | 1.00 | 58.35 | C   |
| ATOM | 2365 | O   | GLU | C | 304 | 9.644  | 18.264 | -3.508 | 1.00 | 58.71 | O   |
| ATOM | 2366 | CB  | GLU | C | 304 | 10.514 | 15.706 | -1.449 | 1.00 | 61.39 | C   |
| ATOM | 2367 | CG  | GLU | C | 304 | 11.511 | 15.099 | -0.475 | 1.00 | 71.50 | C   |
| ATOM | 2368 | CD  | GLU | C | 304 | 10.961 | 13.999 | 0.416  | 1.00 | 71.52 | C   |
| ATOM | 2369 | OE1 | GLU | C | 304 | 9.956  | 14.244 | 1.098  | 1.00 | 66.53 | O   |
| ATOM | 2370 | OE2 | GLU | C | 304 | 11.521 | 12.892 | 0.390  | 1.00 | 76.46 | O1- |
| ATOM | 2371 | N   | ILE | C | 305 | 10.142 | 16.273 | -4.457 | 1.00 | 53.30 | N   |
| ATOM | 2372 | CA  | ILE | C | 305 | 9.406  | 16.432 | -5.687 | 1.00 | 51.16 | C   |
| ATOM | 2373 | C   | ILE | C | 305 | 8.343  | 15.322 | -5.767 | 1.00 | 54.30 | C   |
| ATOM | 2374 | O   | ILE | C | 305 | 8.674  | 14.150 | -5.616 | 1.00 | 57.43 | O   |
| ATOM | 2375 | CB  | ILE | C | 305 | 10.403 | 16.366 | -6.867 | 1.00 | 47.89 | C   |
| ATOM | 2376 | CG1 | ILE | C | 305 | 11.481 | 17.443 | -6.745 | 1.00 | 44.92 | C   |
| ATOM | 2377 | CG2 | ILE | C | 305 | 9.682  | 16.411 | -8.205 | 1.00 | 49.65 | C   |
| ATOM | 2378 | CD1 | ILE | C | 305 | 12.464 | 17.460 | -7.875 | 1.00 | 44.55 | C   |
| ATOM | 2379 | N   | PHE | C | 306 | 7.091  | 15.695 | -6.075 | 1.00 | 55.90 | N   |
| ATOM | 2380 | CA  | PHE | C | 306 | 5.919  | 14.785 | -6.084 | 1.00 | 52.55 | C   |
| ATOM | 2381 | C   | PHE | C | 306 | 6.196  | 13.518 | -6.911 | 1.00 | 52.80 | C   |
| ATOM | 2382 | O   | PHE | C | 306 | 5.913  | 12.381 | -6.463 | 1.00 | 50.13 | O   |

|      |      |     |     |   |     |        |        |         |      |       |     |
|------|------|-----|-----|---|-----|--------|--------|---------|------|-------|-----|
| ATOM | 2383 | CB  | PHE | C | 306 | 4.693  | 15.520 | -6.634  | 1.00 | 51.64 | C   |
| ATOM | 2384 | CG  | PHE | C | 306 | 3.404  | 14.732 | -6.597  | 1.00 | 54.05 | C   |
| ATOM | 2385 | CD1 | PHE | C | 306 | 2.821  | 14.375 | -5.386  | 1.00 | 52.36 | C   |
| ATOM | 2386 | CD2 | PHE | C | 306 | 2.760  | 14.359 | -7.770  | 1.00 | 50.52 | C   |
| ATOM | 2387 | CE1 | PHE | C | 306 | 1.634  | 13.661 | -5.350  | 1.00 | 50.08 | C   |
| ATOM | 2388 | CE2 | PHE | C | 306 | 1.574  | 13.640 | -7.731  | 1.00 | 52.05 | C   |
| ATOM | 2389 | CZ  | PHE | C | 306 | 1.007  | 13.302 | -6.521  | 1.00 | 53.98 | C   |
| ATOM | 2390 | N   | VAL | C | 307 | 6.714  | 13.717 | -8.128  | 1.00 | 52.48 | N   |
| ATOM | 2391 | CA  | VAL | C | 307 | 7.121  | 12.619 | -8.981  | 1.00 | 56.26 | C   |
| ATOM | 2392 | C   | VAL | C | 307 | 8.576  | 12.291 | -8.638  | 1.00 | 58.61 | C   |
| ATOM | 2393 | O   | VAL | C | 307 | 9.471  | 13.053 | -8.970  | 1.00 | 70.54 | O   |
| ATOM | 2394 | CB  | VAL | C | 307 | 6.930  | 12.976 | -10.468 | 1.00 | 58.26 | C   |
| ATOM | 2395 | CG1 | VAL | C | 307 | 7.630  | 11.994 | -11.403 | 1.00 | 58.12 | C   |
| ATOM | 2396 | CG2 | VAL | C | 307 | 5.456  | 13.085 | -10.823 | 1.00 | 55.81 | C   |
| ATOM | 2397 | N   | LYS | C | 308 | 8.803  | 11.159 | -7.966  | 1.00 | 64.76 | N   |
| ATOM | 2398 | CA  | LYS | C | 308 | 10.127 | 10.875 | -7.373  | 1.00 | 71.86 | C   |
| ATOM | 2399 | C   | LYS | C | 308 | 11.094 | 10.383 | -8.463  | 1.00 | 66.67 | C   |
| ATOM | 2400 | O   | LYS | C | 308 | 12.260 | 10.756 | -8.471  | 1.00 | 57.49 | O   |
| ATOM | 2401 | CB  | LYS | C | 308 | 9.963  | 9.958  | -6.153  | 1.00 | 71.62 | C   |
| ATOM | 2402 | CG  | LYS | C | 308 | 9.586  | 10.724 | -4.886  | 1.00 | 83.64 | C   |
| ATOM | 2403 | CD  | LYS | C | 308 | 8.918  | 9.908  | -3.796  | 1.00 | 88.41 | C   |
| ATOM | 2404 | CE  | LYS | C | 308 | 7.442  | 10.208 | -3.633  | 1.00 | 88.06 | C   |
| ATOM | 2405 | NZ  | LYS | C | 308 | 6.764  | 9.135  | -2.867  | 1.00 | 84.33 | N1+ |
| ATOM | 2406 | N   | ASP | C | 309 | 10.595 | 9.609  | -9.425  | 1.00 | 69.22 | N   |
| ATOM | 2407 | CA  | ASP | C | 309 | 11.463 | 8.995  | -10.409 | 1.00 | 76.51 | C   |
| ATOM | 2408 | C   | ASP | C | 309 | 11.772 | 10.017 | -11.498 | 1.00 | 72.90 | C   |
| ATOM | 2409 | O   | ASP | C | 309 | 10.897 | 10.315 | -12.309 | 1.00 | 68.17 | O   |
| ATOM | 2410 | CB  | ASP | C | 309 | 10.848 | 7.716  | -10.979 | 1.00 | 86.36 | C   |
| ATOM | 2411 | CG  | ASP | C | 309 | 11.902 | 6.768  | -11.528 | 1.00 | 93.00 | C   |
| ATOM | 2412 | OD1 | ASP | C | 309 | 12.982 | 7.261  | -11.933 | 1.00 | 94.22 | O   |
| ATOM | 2413 | OD2 | ASP | C | 309 | 11.646 | 5.547  | -11.528 | 1.00 | 97.52 | O1- |
| ATOM | 2414 | N   | PRO | C | 310 | 13.019 | 10.558 | -11.559 | 1.00 | 71.81 | N   |
| ATOM | 2415 | CA  | PRO | C | 310 | 13.357 | 11.681 | -12.436 | 1.00 | 66.47 | C   |

|      |      |     |     |   |     |        |        |         |      |        |     |
|------|------|-----|-----|---|-----|--------|--------|---------|------|--------|-----|
| ATOM | 2416 | C   | PRO | C | 310 | 13.109 | 11.435 | -13.928 | 1.00 | 65.50  | C   |
| ATOM | 2417 | O   | PRO | C | 310 | 12.874 | 12.388 | -14.670 | 1.00 | 75.96  | O   |
| ATOM | 2418 | CB  | PRO | C | 310 | 14.867 | 11.906 | -12.248 | 1.00 | 67.19  | C   |
| ATOM | 2419 | CG  | PRO | C | 310 | 15.156 | 11.281 | -10.904 | 1.00 | 72.01  | C   |
| ATOM | 2420 | CD  | PRO | C | 310 | 14.191 | 10.118 | -10.783 | 1.00 | 72.42  | C   |
| ATOM | 2421 | N   | GLU | C | 311 | 13.182 | 10.176 | -14.357 | 1.00 | 64.69  | N   |
| ATOM | 2422 | CA  | GLU | C | 311 | 12.994 | 9.863  | -15.759 | 1.00 | 66.36  | C   |
| ATOM | 2423 | C   | GLU | C | 311 | 11.508 | 10.026 | -16.125 | 1.00 | 54.10  | C   |
| ATOM | 2424 | O   | GLU | C | 311 | 11.199 | 10.065 | -17.279 | 1.00 | 57.48  | O   |
| ATOM | 2425 | CB  | GLU | C | 311 | 13.616 | 8.506  | -16.135 | 1.00 | 77.87  | C   |
| ATOM | 2426 | CG  | GLU | C | 311 | 13.125 | 7.307  | -15.335 | 1.00 | 85.60  | C   |
| ATOM | 2427 | CD  | GLU | C | 311 | 14.215 | 6.318  | -14.933 | 1.00 | 97.59  | C   |
| ATOM | 2428 | OE1 | GLU | C | 311 | 13.933 | 5.082  | -14.887 | 1.00 | 94.43  | O   |
| ATOM | 2429 | OE2 | GLU | C | 311 | 15.344 | 6.779  | -14.651 | 1.00 | 103.03 | O1- |
| ATOM | 2430 | N   | TYR | C | 312 | 10.604 | 10.206 | -15.160 | 1.00 | 47.57  | N   |
| ATOM | 2431 | CA  | TYR | C | 312 | 9.193  | 10.437 | -15.488 | 1.00 | 52.34  | C   |
| ATOM | 2432 | C   | TYR | C | 312 | 8.759  | 11.871 | -15.127 | 1.00 | 49.05  | C   |
| ATOM | 2433 | O   | TYR | C | 312 | 7.541  | 12.158 | -15.123 | 1.00 | 42.02  | O   |
| ATOM | 2434 | CB  | TYR | C | 312 | 8.319  | 9.363  | -14.825 | 1.00 | 61.05  | C   |
| ATOM | 2435 | CG  | TYR | C | 312 | 8.700  | 7.949  | -15.201 | 1.00 | 70.86  | C   |
| ATOM | 2436 | CD1 | TYR | C | 312 | 9.144  | 7.666  | -16.483 | 1.00 | 72.10  | C   |
| ATOM | 2437 | CD2 | TYR | C | 312 | 8.632  | 6.895  | -14.292 | 1.00 | 66.98  | C   |
| ATOM | 2438 | CE1 | TYR | C | 312 | 9.534  | 6.390  | -16.849 | 1.00 | 77.83  | C   |
| ATOM | 2439 | CE2 | TYR | C | 312 | 8.999  | 5.605  | -14.650 | 1.00 | 65.61  | C   |
| ATOM | 2440 | CZ  | TYR | C | 312 | 9.454  | 5.353  | -15.938 | 1.00 | 75.69  | C   |
| ATOM | 2441 | OH  | TYR | C | 312 | 9.818  | 4.109  | -16.381 | 1.00 | 71.21  | O   |
| ATOM | 2442 | N   | ARG | C | 313 | 9.733  | 12.771 | -14.885 | 1.00 | 45.79  | N   |
| ATOM | 2443 | CA  | ARG | C | 313 | 9.462  | 14.192 | -14.559 | 1.00 | 47.63  | C   |
| ATOM | 2444 | C   | ARG | C | 313 | 9.332  | 15.019 | -15.849 | 1.00 | 46.28  | C   |
| ATOM | 2445 | O   | ARG | C | 313 | 10.137 | 14.914 | -16.781 | 1.00 | 40.67  | O   |
| ATOM | 2446 | CB  | ARG | C | 313 | 10.543 | 14.771 | -13.642 | 1.00 | 47.48  | C   |
| ATOM | 2447 | CG  | ARG | C | 313 | 10.560 | 14.132 | -12.262 | 1.00 | 55.96  | C   |
| ATOM | 2448 | CD  | ARG | C | 313 | 11.216 | 14.914 | -11.137 | 1.00 | 53.49  | C   |



|      |      |     |     |   |     |        |        |         |      |       |     |
|------|------|-----|-----|---|-----|--------|--------|---------|------|-------|-----|
| ATOM | 2449 | NE  | ARG | C | 313 | 12.648 | 14.696 | -10.978 | 1.00 | 54.40 | N   |
| ATOM | 2450 | CZ  | ARG | C | 313 | 13.257 | 14.442 | -9.822  | 1.00 | 55.83 | C   |
| ATOM | 2451 | NH1 | ARG | C | 313 | 12.594 | 13.856 | -8.839  | 1.00 | 53.86 | N1+ |
| ATOM | 2452 | NH2 | ARG | C | 313 | 14.524 | 14.790 | -9.655  | 1.00 | 48.31 | N   |
| ATOM | 2453 | N   | LEU | C | 314 | 8.272  | 15.833 | -15.884 | 1.00 | 48.39 | N   |
| ATOM | 2454 | CA  | LEU | C | 314 | 8.039  | 16.839 | -16.913 | 1.00 | 40.16 | C   |
| ATOM | 2455 | C   | LEU | C | 314 | 8.948  | 18.019 | -16.619 | 1.00 | 37.72 | C   |
| ATOM | 2456 | O   | LEU | C | 314 | 8.741  | 18.698 | -15.622 | 1.00 | 45.32 | O   |
| ATOM | 2457 | CB  | LEU | C | 314 | 6.576  | 17.283 | -16.859 | 1.00 | 40.74 | C   |
| ATOM | 2458 | CG  | LEU | C | 314 | 6.219  | 18.461 | -17.769 | 1.00 | 45.02 | C   |
| ATOM | 2459 | CD1 | LEU | C | 314 | 6.438  | 18.099 | -19.227 | 1.00 | 47.14 | C   |
| ATOM | 2460 | CD2 | LEU | C | 314 | 4.778  | 18.908 | -17.559 | 1.00 | 44.01 | C   |
| ATOM | 2461 | N   | PRO | C | 315 | 9.958  | 18.325 | -17.452 | 1.00 | 35.58 | N   |
| ATOM | 2462 | CA  | PRO | C | 315 | 10.880 | 19.403 | -17.124 | 1.00 | 39.20 | C   |
| ATOM | 2463 | C   | PRO | C | 315 | 10.211 | 20.778 | -16.915 | 1.00 | 40.65 | C   |
| ATOM | 2464 | O   | PRO | C | 315 | 10.716 | 21.566 | -16.147 | 1.00 | 45.09 | O   |
| ATOM | 2465 | CB  | PRO | C | 315 | 11.887 | 19.414 | -18.295 | 1.00 | 41.40 | C   |
| ATOM | 2466 | CG  | PRO | C | 315 | 11.274 | 18.571 | -19.393 | 1.00 | 38.00 | C   |
| ATOM | 2467 | CD  | PRO | C | 315 | 10.277 | 17.655 | -18.723 | 1.00 | 37.98 | C   |
| ATOM | 2468 | N   | THR | C | 316 | 9.066  | 21.053 | -17.549 | 1.00 | 40.60 | N   |
| ATOM | 2469 | CA  | THR | C | 316 | 8.503  | 22.407 | -17.536 | 1.00 | 38.57 | C   |
| ATOM | 2470 | C   | THR | C | 316 | 7.638  | 22.674 | -16.305 | 1.00 | 39.24 | C   |
| ATOM | 2471 | O   | THR | C | 316 | 7.304  | 23.848 | -16.044 | 1.00 | 36.19 | O   |
| ATOM | 2472 | CB  | THR | C | 316 | 7.678  | 22.686 | -18.793 | 1.00 | 40.72 | C   |
| ATOM | 2473 | CG2 | THR | C | 316 | 8.538  | 22.580 | -20.037 | 1.00 | 39.90 | C   |
| ATOM | 2474 | OG1 | THR | C | 316 | 6.555  | 21.797 | -18.834 | 1.00 | 38.66 | O   |
| ATOM | 2475 | N   | VAL | C | 317 | 7.246  | 21.606 | -15.590 | 1.00 | 40.19 | N   |
| ATOM | 2476 | CA  | VAL | C | 317 | 6.526  | 21.725 | -14.338 | 1.00 | 38.36 | C   |
| ATOM | 2477 | C   | VAL | C | 317 | 7.084  | 20.728 | -13.320 | 1.00 | 40.31 | C   |
| ATOM | 2478 | O   | VAL | C | 317 | 7.185  | 19.537 | -13.596 | 1.00 | 39.54 | O   |
| ATOM | 2479 | CB  | VAL | C | 317 | 5.024  | 21.523 | -14.523 | 1.00 | 39.49 | C   |
| ATOM | 2480 | CG1 | VAL | C | 317 | 4.274  | 21.868 | -13.249 | 1.00 | 42.74 | C   |
| ATOM | 2481 | CG2 | VAL | C | 317 | 4.506  | 22.331 | -15.688 | 1.00 | 41.91 | C   |

|      |      |     |     |   |     |        |        |         |      |       |   |
|------|------|-----|-----|---|-----|--------|--------|---------|------|-------|---|
| ATOM | 2482 | N   | THR | C | 318 | 7.470  | 21.269 | -12.160 | 1.00 | 39.78 | N |
| ATOM | 2483 | CA  | THR | C | 318 | 8.052  | 20.545 | -11.071 | 1.00 | 41.38 | C |
| ATOM | 2484 | C   | THR | C | 318 | 7.309  | 20.874 | -9.772  | 1.00 | 46.15 | C |
| ATOM | 2485 | O   | THR | C | 318 | 7.306  | 22.064 | -9.337  | 1.00 | 40.06 | O |
| ATOM | 2486 | CB  | THR | C | 318 | 9.518  | 20.936 | -10.874 | 1.00 | 41.44 | C |
| ATOM | 2487 | CG2 | THR | C | 318 | 10.126 | 20.184 | -9.706  | 1.00 | 42.39 | C |
| ATOM | 2488 | OG1 | THR | C | 318 | 10.242 | 20.696 | -12.078 | 1.00 | 37.26 | O |
| ATOM | 2489 | N   | CYS | C | 319 | 6.720  | 19.840 | -9.144  | 1.00 | 49.07 | N |
| ATOM | 2490 | CA  | CYS | C | 319 | 5.801  | 20.039 | -8.000  | 1.00 | 50.81 | C |
| ATOM | 2491 | C   | CYS | C | 319 | 6.522  | 19.796 | -6.672  | 1.00 | 48.45 | C |
| ATOM | 2492 | O   | CYS | C | 319 | 6.791  | 18.672 | -6.286  | 1.00 | 52.55 | O |
| ATOM | 2493 | CB  | CYS | C | 319 | 4.564  | 19.163 | -8.108  | 1.00 | 50.13 | C |
| ATOM | 2494 | SG  | CYS | C | 319 | 3.514  | 19.645 | -9.500  | 1.00 | 53.46 | S |
| ATOM | 2495 | N   | ILE | C | 320 | 6.777  | 20.899 | -5.976  | 1.00 | 46.30 | N |
| ATOM | 2496 | CA  | ILE | C | 320 | 7.605  | 20.979 | -4.793  | 1.00 | 46.47 | C |
| ATOM | 2497 | C   | ILE | C | 320 | 6.738  | 20.687 | -3.563  | 1.00 | 47.29 | C |
| ATOM | 2498 | O   | ILE | C | 320 | 5.739  | 21.392 | -3.350  | 1.00 | 46.08 | O |
| ATOM | 2499 | CB  | ILE | C | 320 | 8.209  | 22.395 | -4.716  | 1.00 | 46.00 | C |
| ATOM | 2500 | CG1 | ILE | C | 320 | 9.101  | 22.696 | -5.927  | 1.00 | 45.93 | C |
| ATOM | 2501 | CG2 | ILE | C | 320 | 8.929  | 22.601 | -3.393  | 1.00 | 49.10 | C |
| ATOM | 2502 | CD1 | ILE | C | 320 | 9.422  | 24.172 | -6.111  | 1.00 | 44.75 | C |
| ATOM | 2503 | N   | MET | C | 321 | 7.141  | 19.699 | -2.742  | 1.00 | 48.98 | N |
| ATOM | 2504 | CA  | MET | C | 321 | 6.296  | 19.195 | -1.609  | 1.00 | 48.81 | C |
| ATOM | 2505 | C   | MET | C | 321 | 6.421  | 20.155 | -0.416  | 1.00 | 45.45 | C |
| ATOM | 2506 | O   | MET | C | 321 | 7.505  | 20.505 | -0.007  | 1.00 | 47.53 | O |
| ATOM | 2507 | CB  | MET | C | 321 | 6.692  | 17.774 | -1.175  | 1.00 | 48.24 | C |
| ATOM | 2508 | CG  | MET | C | 321 | 6.493  | 16.687 | -2.244  | 1.00 | 49.85 | C |
| ATOM | 2509 | SD  | MET | C | 321 | 4.768  | 16.546 | -2.867  | 1.00 | 56.35 | S |
| ATOM | 2510 | CE  | MET | C | 321 | 3.946  | 15.868 | -1.424  | 1.00 | 52.09 | C |
| ATOM | 2511 | N   | ILE | C | 322 | 5.289  | 20.610 | 0.115   | 1.00 | 46.16 | N |
| ATOM | 2512 | CA  | ILE | C | 322 | 5.301  | 21.529 | 1.235   | 1.00 | 48.84 | C |
| ATOM | 2513 | C   | ILE | C | 322 | 5.775  | 20.768 | 2.470   | 1.00 | 50.93 | C |
| ATOM | 2514 | O   | ILE | C | 322 | 5.130  | 19.812 | 2.869   | 1.00 | 54.78 | O |

|      |      |     |     |   |     |       |        |        |      |       |     |
|------|------|-----|-----|---|-----|-------|--------|--------|------|-------|-----|
| ATOM | 2515 | CB  | ILE | C | 322 | 3.909 | 22.140 | 1.470  | 1.00 | 51.16 | C   |
| ATOM | 2516 | CG1 | ILE | C | 322 | 3.355 | 22.845 | 0.226  | 1.00 | 53.91 | C   |
| ATOM | 2517 | CG2 | ILE | C | 322 | 3.954 | 23.082 | 2.662  | 1.00 | 57.68 | C   |
| ATOM | 2518 | CD1 | ILE | C | 322 | 1.842 | 23.036 | 0.220  | 1.00 | 50.27 | C   |
| ATOM | 2519 | N   | PRO | C | 323 | 6.873 | 21.178 | 3.144  | 1.00 | 54.56 | N   |
| ATOM | 2520 | CA  | PRO | C | 323 | 7.314 | 20.506 | 4.369  | 1.00 | 51.09 | C   |
| ATOM | 2521 | C   | PRO | C | 323 | 6.270 | 20.624 | 5.489  | 1.00 | 53.81 | C   |
| ATOM | 2522 | O   | PRO | C | 323 | 5.548 | 21.650 | 5.553  | 1.00 | 47.03 | O   |
| ATOM | 2523 | CB  | PRO | C | 323 | 8.591 | 21.246 | 4.799  | 1.00 | 50.66 | C   |
| ATOM | 2524 | CG  | PRO | C | 323 | 8.999 | 22.084 | 3.583  | 1.00 | 53.22 | C   |
| ATOM | 2525 | CD  | PRO | C | 323 | 7.728 | 22.328 | 2.798  | 1.00 | 53.39 | C   |
| ATOM | 2526 | N   | LYS | C | 324 | 6.199 | 19.582 | 6.338  | 1.00 | 57.79 | N   |
| ATOM | 2527 | CA  | LYS | C | 324 | 5.280 | 19.536 | 7.483  | 1.00 | 59.84 | C   |
| ATOM | 2528 | C   | LYS | C | 324 | 5.381 | 20.881 | 8.199  | 1.00 | 52.74 | C   |
| ATOM | 2529 | O   | LYS | C | 324 | 6.494 | 21.402 | 8.374  | 1.00 | 46.95 | O   |
| ATOM | 2530 | CB  | LYS | C | 324 | 5.564 | 18.348 | 8.419  | 1.00 | 68.67 | C   |
| ATOM | 2531 | CG  | LYS | C | 324 | 5.010 | 18.459 | 9.848  | 1.00 | 73.18 | C   |
| ATOM | 2532 | CD  | LYS | C | 324 | 4.307 | 17.206 | 10.399 | 1.00 | 74.79 | C   |
| ATOM | 2533 | CE  | LYS | C | 324 | 5.231 | 16.173 | 11.012 | 1.00 | 85.21 | C   |
| ATOM | 2534 | NZ  | LYS | C | 324 | 5.883 | 15.319 | 9.986  | 1.00 | 97.60 | N1+ |
| ATOM | 2535 | N   | GLY | C | 325 | 4.201 | 21.454 | 8.489  | 1.00 | 49.15 | N   |
| ATOM | 2536 | CA  | GLY | C | 325 | 4.023 | 22.627 | 9.333  | 1.00 | 47.40 | C   |
| ATOM | 2537 | C   | GLY | C | 325 | 4.362 | 23.938 | 8.655  | 1.00 | 50.86 | C   |
| ATOM | 2538 | O   | GLY | C | 325 | 4.424 | 24.949 | 9.334  | 1.00 | 54.45 | O   |
| ATOM | 2539 | N   | VAL | C | 326 | 4.555 | 23.946 | 7.327  | 1.00 | 57.07 | N   |
| ATOM | 2540 | CA  | VAL | C | 326 | 4.834 | 25.190 | 6.566  | 1.00 | 51.81 | C   |
| ATOM | 2541 | C   | VAL | C | 326 | 3.534 | 25.662 | 5.907  | 1.00 | 52.21 | C   |
| ATOM | 2542 | O   | VAL | C | 326 | 2.856 | 24.868 | 5.249  | 1.00 | 62.79 | O   |
| ATOM | 2543 | CB  | VAL | C | 326 | 5.943 | 24.979 | 5.516  | 1.00 | 52.87 | C   |
| ATOM | 2544 | CG1 | VAL | C | 326 | 6.036 | 26.155 | 4.556  | 1.00 | 54.58 | C   |
| ATOM | 2545 | CG2 | VAL | C | 326 | 7.303 | 24.696 | 6.149  | 1.00 | 48.45 | C   |
| ATOM | 2546 | N   | ASN | C | 327 | 3.202 | 26.949 | 6.065  | 1.00 | 49.46 | N   |
| ATOM | 2547 | CA  | ASN | C | 327 | 2.024 | 27.562 | 5.394  | 1.00 | 53.76 | C   |

|      |      |     |     |   |     |        |        |        |      |       |   |
|------|------|-----|-----|---|-----|--------|--------|--------|------|-------|---|
| ATOM | 2548 | C   | ASN | C | 327 | 2.411  | 28.024 | 3.973  | 1.00 | 51.52 | C |
| ATOM | 2549 | O   | ASN | C | 327 | 3.133  | 29.007 | 3.790  | 1.00 | 49.32 | O |
| ATOM | 2550 | CB  | ASN | C | 327 | 1.446  | 28.721 | 6.220  | 1.00 | 51.79 | C |
| ATOM | 2551 | CG  | ASN | C | 327 | 0.357  | 29.494 | 5.502  | 1.00 | 52.90 | C |
| ATOM | 2552 | ND2 | ASN | C | 327 | -0.130 | 30.546 | 6.131  | 1.00 | 53.64 | N |
| ATOM | 2553 | OD1 | ASN | C | 327 | -0.050 | 29.158 | 4.389  | 1.00 | 54.07 | O |
| ATOM | 2554 | N   | TRP | C | 328 | 1.876  | 27.349 | 2.955  | 1.00 | 50.10 | N |
| ATOM | 2555 | CA  | TRP | C | 328 | 2.310  | 27.601 | 1.578  | 1.00 | 56.13 | C |
| ATOM | 2556 | C   | TRP | C | 328 | 1.904  | 29.008 | 1.108  | 1.00 | 57.31 | C |
| ATOM | 2557 | O   | TRP | C | 328 | 2.661  | 29.645 | 0.399  | 1.00 | 52.47 | O |
| ATOM | 2558 | CB  | TRP | C | 328 | 1.784  | 26.513 | 0.648  | 1.00 | 56.13 | C |
| ATOM | 2559 | CG  | TRP | C | 328 | 0.358  | 26.706 | 0.281  | 1.00 | 55.88 | C |
| ATOM | 2560 | CD1 | TRP | C | 328 | -0.730 | 26.147 | 0.879  | 1.00 | 61.43 | C |
| ATOM | 2561 | CD2 | TRP | C | 328 | -0.134 | 27.549 | -0.770 | 1.00 | 63.88 | C |
| ATOM | 2562 | CE2 | TRP | C | 328 | -1.541 | 27.438 | -0.752 | 1.00 | 67.06 | C |
| ATOM | 2563 | CE3 | TRP | C | 328 | 0.471  | 28.381 | -1.720 | 1.00 | 62.24 | C |
| ATOM | 2564 | NE1 | TRP | C | 328 | -1.874 | 26.582 | 0.268  | 1.00 | 63.45 | N |
| ATOM | 2565 | CZ2 | TRP | C | 328 | -2.345 | 28.135 | -1.656 | 1.00 | 63.44 | C |
| ATOM | 2566 | CZ3 | TRP | C | 328 | -0.326 | 29.069 | -2.610 | 1.00 | 56.18 | C |
| ATOM | 2567 | CH2 | TRP | C | 328 | -1.715 | 28.953 | -2.568 | 1.00 | 59.73 | C |
| ATOM | 2568 | N   | TRP | C | 329 | 0.732  | 29.485 | 1.546  | 1.00 | 63.69 | N |
| ATOM | 2569 | CA  | TRP | C | 329 | 0.193  | 30.792 | 1.172  | 1.00 | 64.58 | C |
| ATOM | 2570 | C   | TRP | C | 329 | 1.114  | 31.926 | 1.659  | 1.00 | 65.08 | C |
| ATOM | 2571 | O   | TRP | C | 329 | 1.356  | 32.907 | 0.931  | 1.00 | 57.77 | O |
| ATOM | 2572 | CB  | TRP | C | 329 | -1.256 | 30.961 | 1.677  | 1.00 | 75.54 | C |
| ATOM | 2573 | CG  | TRP | C | 329 | -1.849 | 32.318 | 1.422  | 1.00 | 85.33 | C |
| ATOM | 2574 | CD1 | TRP | C | 329 | -2.385 | 33.163 | 2.352  | 1.00 | 87.24 | C |
| ATOM | 2575 | CD2 | TRP | C | 329 | -1.938 | 33.008 | 0.151  | 1.00 | 99.16 | C |
| ATOM | 2576 | CE2 | TRP | C | 329 | -2.546 | 34.259 | 0.406  | 1.00 | 98.59 | C |
| ATOM | 2577 | CE3 | TRP | C | 329 | -1.558 | 32.702 | -1.172 | 1.00 | 97.77 | C |
| ATOM | 2578 | NE1 | TRP | C | 329 | -2.808 | 34.322 | 1.753  | 1.00 | 92.67 | N |
| ATOM | 2579 | CZ2 | TRP | C | 329 | -2.787 | 35.186 | -0.613 | 1.00 | 98.80 | C |
| ATOM | 2580 | CZ3 | TRP | C | 329 | -1.792 | 33.618 | -2.176 | 1.00 | 90.65 | C |

|      |      |     |     |   |     |        |        |        |      |        |     |
|------|------|-----|-----|---|-----|--------|--------|--------|------|--------|-----|
| ATOM | 2581 | CH2 | TRP | C | 329 | -2.403 | 34.843 | -1.894 | 1.00 | 100.56 | C   |
| ATOM | 2582 | N   | LYS | C | 330 | 1.638  | 31.817 | 2.882  | 1.00 | 61.97  | N   |
| ATOM | 2583 | CA  | LYS | C | 330 | 2.511  | 32.880 | 3.411  | 1.00 | 66.78  | C   |
| ATOM | 2584 | C   | LYS | C | 330 | 3.734  | 33.046 | 2.488  | 1.00 | 57.97  | C   |
| ATOM | 2585 | O   | LYS | C | 330 | 4.207  | 34.178 | 2.274  | 1.00 | 58.08  | O   |
| ATOM | 2586 | CB  | LYS | C | 330 | 2.940  | 32.598 | 4.863  | 1.00 | 80.24  | C   |
| ATOM | 2587 | CG  | LYS | C | 330 | 2.053  | 33.169 | 5.979  | 1.00 | 89.02  | C   |
| ATOM | 2588 | CD  | LYS | C | 330 | 2.671  | 33.045 | 7.388  | 1.00 | 96.81  | C   |
| ATOM | 2589 | CE  | LYS | C | 330 | 1.679  | 32.799 | 8.514  | 1.00 | 96.42  | C   |
| ATOM | 2590 | NZ  | LYS | C | 330 | 2.266  | 31.930 | 9.565  | 1.00 | 95.36  | N1+ |
| ATOM | 2591 | N   | VAL | C | 331 | 4.243  | 31.931 | 1.944  | 1.00 | 48.32  | N   |
| ATOM | 2592 | CA  | VAL | C | 331 | 5.474  | 31.934 | 1.152  | 1.00 | 47.67  | C   |
| ATOM | 2593 | C   | VAL | C | 331 | 5.197  | 32.566 | -0.221 | 1.00 | 46.80  | C   |
| ATOM | 2594 | O   | VAL | C | 331 | 5.965  | 33.380 | -0.687 | 1.00 | 50.13  | O   |
| ATOM | 2595 | CB  | VAL | C | 331 | 6.076  | 30.521 | 1.036  | 1.00 | 47.07  | C   |
| ATOM | 2596 | CG1 | VAL | C | 331 | 7.353  | 30.491 | 0.211  | 1.00 | 46.79  | C   |
| ATOM | 2597 | CG2 | VAL | C | 331 | 6.354  | 29.930 | 2.404  | 1.00 | 49.15  | C   |
| ATOM | 2598 | N   | SER | C | 332 | 4.080  | 32.198 | -0.844 | 1.00 | 47.64  | N   |
| ATOM | 2599 | CA  | SER | C | 332 | 3.681  | 32.735 | -2.142 | 1.00 | 49.10  | C   |
| ATOM | 2600 | C   | SER | C | 332 | 3.424  | 34.243 | -2.053 | 1.00 | 47.45  | C   |
| ATOM | 2601 | O   | SER | C | 332 | 3.753  | 34.980 | -2.956 | 1.00 | 53.12  | O   |
| ATOM | 2602 | CB  | SER | C | 332 | 2.481  | 31.989 | -2.683 | 1.00 | 48.42  | C   |
| ATOM | 2603 | OG  | SER | C | 332 | 2.795  | 30.610 | -2.872 | 1.00 | 51.10  | O   |
| ATOM | 2604 | N   | GLU | C | 333 | 2.824  | 34.680 | -0.951 | 1.00 | 50.00  | N   |
| ATOM | 2605 | CA  | GLU | C | 333 | 2.481  | 36.085 | -0.710 | 1.00 | 49.86  | C   |
| ATOM | 2606 | C   | GLU | C | 333 | 3.769  | 36.913 | -0.555 | 1.00 | 46.28  | C   |
| ATOM | 2607 | O   | GLU | C | 333 | 3.973  | 37.948 | -1.203 | 1.00 | 46.68  | O   |
| ATOM | 2608 | CB  | GLU | C | 333 | 1.602  | 36.174 | 0.542  | 1.00 | 50.15  | C   |
| ATOM | 2609 | CG  | GLU | C | 333 | 0.786  | 37.441 | 0.631  | 1.00 | 57.15  | C   |
| ATOM | 2610 | CD  | GLU | C | 333 | 0.705  | 38.071 | 2.013  | 1.00 | 60.96  | C   |
| ATOM | 2611 | OE1 | GLU | C | 333 | 1.109  | 37.421 | 2.997  | 1.00 | 56.44  | O   |
| ATOM | 2612 | OE2 | GLU | C | 333 | 0.259  | 39.234 | 2.089  | 1.00 | 64.86  | O1- |
| ATOM | 2613 | N   | TYR | C | 334 | 4.660  | 36.428 | 0.309  | 1.00 | 45.78  | N   |

|      |      |     |     |   |     |        |        |        |      |       |   |
|------|------|-----|-----|---|-----|--------|--------|--------|------|-------|---|
| ATOM | 2614 | CA  | TYR | C | 334 | 5.918  | 37.085 | 0.532  | 1.00 | 45.07 | C |
| ATOM | 2615 | C   | TYR | C | 334 | 6.662  | 37.257 | -0.800 | 1.00 | 41.66 | C |
| ATOM | 2616 | O   | TYR | C | 334 | 7.175  | 38.329 | -1.070 | 1.00 | 40.86 | O |
| ATOM | 2617 | CB  | TYR | C | 334 | 6.782  | 36.317 | 1.539  | 1.00 | 42.48 | C |
| ATOM | 2618 | CG  | TYR | C | 334 | 7.975  | 37.115 | 1.990  | 1.00 | 43.02 | C |
| ATOM | 2619 | CD1 | TYR | C | 334 | 7.835  | 38.062 | 2.992  | 1.00 | 44.61 | C |
| ATOM | 2620 | CD2 | TYR | C | 334 | 9.220  | 36.977 | 1.384  | 1.00 | 42.18 | C |
| ATOM | 2621 | CE1 | TYR | C | 334 | 8.904  | 38.841 | 3.399  | 1.00 | 44.43 | C |
| ATOM | 2622 | CE2 | TYR | C | 334 | 10.306 | 37.740 | 1.790  | 1.00 | 43.09 | C |
| ATOM | 2623 | CZ  | TYR | C | 334 | 10.137 | 38.684 | 2.791  | 1.00 | 45.64 | C |
| ATOM | 2624 | OH  | TYR | C | 334 | 11.166 | 39.446 | 3.242  | 1.00 | 47.14 | O |
| ATOM | 2625 | N   | ALA | C | 335 | 6.730  | 36.183 | -1.601 | 1.00 | 38.16 | N |
| ATOM | 2626 | CA  | ALA | C | 335 | 7.550  | 36.145 | -2.809 | 1.00 | 39.50 | C |
| ATOM | 2627 | C   | ALA | C | 335 | 7.015  | 37.148 | -3.851 | 1.00 | 40.92 | C |
| ATOM | 2628 | O   | ALA | C | 335 | 7.789  | 37.767 | -4.604 | 1.00 | 39.80 | O |
| ATOM | 2629 | CB  | ALA | C | 335 | 7.586  | 34.741 | -3.342 | 1.00 | 40.63 | C |
| ATOM | 2630 | N   | MET | C | 336 | 5.692  | 37.343 | -3.859 | 1.00 | 40.12 | N |
| ATOM | 2631 | CA  | MET | C | 336 | 5.053  | 38.264 | -4.775 | 1.00 | 41.81 | C |
| ATOM | 2632 | C   | MET | C | 336 | 5.262  | 39.705 | -4.267 | 1.00 | 45.26 | C |
| ATOM | 2633 | O   | MET | C | 336 | 5.604  | 40.631 | -5.049 | 1.00 | 43.29 | O |
| ATOM | 2634 | CB  | MET | C | 336 | 3.566  | 37.914 | -4.912 | 1.00 | 38.40 | C |
| ATOM | 2635 | CG  | MET | C | 336 | 2.754  | 38.835 | -5.827 | 1.00 | 38.32 | C |
| ATOM | 2636 | SD  | MET | C | 336 | 3.375  | 39.010 | -7.526 | 1.00 | 38.14 | S |
| ATOM | 2637 | CE  | MET | C | 336 | 3.172  | 37.339 | -8.136 | 1.00 | 40.51 | C |
| ATOM | 2638 | N   | ASN | C | 337 | 5.122  | 39.906 | -2.954 | 1.00 | 40.60 | N |
| ATOM | 2639 | CA  | ASN | C | 337 | 5.219  | 41.235 | -2.419 | 1.00 | 38.40 | C |
| ATOM | 2640 | C   | ASN | C | 337 | 6.649  | 41.752 | -2.543 | 1.00 | 37.17 | C |
| ATOM | 2641 | O   | ASN | C | 337 | 6.835  | 42.940 | -2.673 | 1.00 | 41.50 | O |
| ATOM | 2642 | CB  | ASN | C | 337 | 4.766  | 41.310 | -0.962 | 1.00 | 40.06 | C |
| ATOM | 2643 | CG  | ASN | C | 337 | 3.282  | 41.107 | -0.793 | 1.00 | 39.21 | C |
| ATOM | 2644 | ND2 | ASN | C | 337 | 2.871  | 40.940 | 0.444  | 1.00 | 43.32 | N |
| ATOM | 2645 | OD1 | ASN | C | 337 | 2.523  | 41.072 | -1.758 | 1.00 | 42.60 | O |
| ATOM | 2646 | N   | ASN | C | 338 | 7.642  | 40.875 | -2.446 | 1.00 | 34.00 | N |

|      |      |     |     |   |     |        |        |        |      |       |   |
|------|------|-----|-----|---|-----|--------|--------|--------|------|-------|---|
| ATOM | 2647 | CA  | ASN | C | 338 | 9.037  | 41.297 | -2.298 | 1.00 | 39.00 | C |
| ATOM | 2648 | C   | ASN | C | 338 | 9.842  | 41.164 | -3.602 | 1.00 | 42.23 | C |
| ATOM | 2649 | O   | ASN | C | 338 | 10.732 | 41.973 | -3.826 | 1.00 | 41.46 | O |
| ATOM | 2650 | CB  | ASN | C | 338 | 9.725  | 40.504 | -1.177 | 1.00 | 42.17 | C |
| ATOM | 2651 | CG  | ASN | C | 338 | 9.257  | 40.960 | 0.185  | 1.00 | 40.14 | C |
| ATOM | 2652 | ND2 | ASN | C | 338 | 8.133  | 40.438 | 0.646  | 1.00 | 39.45 | N |
| ATOM | 2653 | OD1 | ASN | C | 338 | 9.855  | 41.855 | 0.766  | 1.00 | 42.10 | O |
| ATOM | 2654 | N   | PHE | C | 339 | 9.549  | 40.141 | -4.430 | 1.00 | 45.83 | N |
| ATOM | 2655 | CA  | PHE | C | 339 | 10.353 | 39.812 | -5.641 | 1.00 | 46.44 | C |
| ATOM | 2656 | C   | PHE | C | 339 | 9.557  | 39.894 | -6.961 | 1.00 | 46.67 | C |
| ATOM | 2657 | O   | PHE | C | 339 | 10.160 | 39.753 | -8.049 | 1.00 | 47.31 | O |
| ATOM | 2658 | CB  | PHE | C | 339 | 10.948 | 38.412 | -5.470 | 1.00 | 44.22 | C |
| ATOM | 2659 | CG  | PHE | C | 339 | 11.811 | 38.294 | -4.245 | 1.00 | 42.47 | C |
| ATOM | 2660 | CD1 | PHE | C | 339 | 12.934 | 39.089 | -4.101 | 1.00 | 43.95 | C |
| ATOM | 2661 | CD2 | PHE | C | 339 | 11.462 | 37.449 | -3.209 | 1.00 | 43.84 | C |
| ATOM | 2662 | CE1 | PHE | C | 339 | 13.717 | 39.017 | -2.961 | 1.00 | 42.38 | C |
| ATOM | 2663 | CE2 | PHE | C | 339 | 12.242 | 37.382 | -2.063 | 1.00 | 45.62 | C |
| ATOM | 2664 | CZ  | PHE | C | 339 | 13.370 | 38.164 | -1.944 | 1.00 | 42.16 | C |
| ATOM | 2665 | N   | SER | C | 340 | 8.237  | 40.113 | -6.868 | 1.00 | 43.21 | N |
| ATOM | 2666 | CA  | SER | C | 340 | 7.284  | 40.079 | -7.977 | 1.00 | 40.80 | C |
| ATOM | 2667 | C   | SER | C | 340 | 7.288  | 38.709 | -8.666 | 1.00 | 43.46 | C |
| ATOM | 2668 | O   | SER | C | 340 | 7.027  | 38.598 | -9.882 | 1.00 | 44.81 | O |
| ATOM | 2669 | CB  | SER | C | 340 | 7.545  | 41.196 | -8.923 | 1.00 | 39.85 | C |
| ATOM | 2670 | OG  | SER | C | 340 | 7.140  | 42.402 | -8.318 | 1.00 | 43.16 | O |
| ATOM | 2671 | N   | LEU | C | 341 | 7.513  | 37.669 | -7.860 | 1.00 | 40.91 | N |
| ATOM | 2672 | CA  | LEU | C | 341 | 7.564  | 36.304 | -8.316 | 1.00 | 41.54 | C |
| ATOM | 2673 | C   | LEU | C | 341 | 6.239  | 35.590 | -8.012 | 1.00 | 42.54 | C |
| ATOM | 2674 | O   | LEU | C | 341 | 5.708  | 35.659 | -6.881 | 1.00 | 37.75 | O |
| ATOM | 2675 | CB  | LEU | C | 341 | 8.709  | 35.609 | -7.578 | 1.00 | 43.59 | C |
| ATOM | 2676 | CG  | LEU | C | 341 | 8.991  | 34.177 | -8.016 | 1.00 | 44.80 | C |
| ATOM | 2677 | CD1 | LEU | C | 341 | 9.315  | 34.105 | -9.490 | 1.00 | 49.56 | C |
| ATOM | 2678 | CD2 | LEU | C | 341 | 10.141 | 33.588 | -7.227 | 1.00 | 48.32 | C |
| ATOM | 2679 | N   | GLU | C | 342 | 5.758  | 34.847 | -9.012 | 1.00 | 41.50 | N |

|      |      |     |     |   |     |        |        |         |      |       |     |
|------|------|-----|-----|---|-----|--------|--------|---------|------|-------|-----|
| ATOM | 2680 | CA  | GLU | C | 342 | 4.661  | 33.913 | -8.871  | 1.00 | 46.15 | C   |
| ATOM | 2681 | C   | GLU | C | 342 | 5.212  | 32.560 | -8.389  | 1.00 | 42.64 | C   |
| ATOM | 2682 | O   | GLU | C | 342 | 5.880  | 31.875 | -9.139  | 1.00 | 40.58 | O   |
| ATOM | 2683 | CB  | GLU | C | 342 | 3.959  | 33.770 | -10.231 | 1.00 | 48.85 | C   |
| ATOM | 2684 | CG  | GLU | C | 342 | 2.949  | 32.629 | -10.305 | 1.00 | 48.30 | C   |
| ATOM | 2685 | CD  | GLU | C | 342 | 1.662  | 32.860 | -9.526  | 1.00 | 52.28 | C   |
| ATOM | 2686 | OE1 | GLU | C | 342 | 1.590  | 33.843 | -8.780  | 1.00 | 55.58 | O   |
| ATOM | 2687 | OE2 | GLU | C | 342 | 0.714  | 32.077 | -9.701  | 1.00 | 60.46 | O1- |
| ATOM | 2688 | N   | ILE | C | 343 | 4.924  | 32.190 | -7.139  | 1.00 | 41.22 | N   |
| ATOM | 2689 | CA  | ILE | C | 343 | 5.131  | 30.812 | -6.644  | 1.00 | 44.36 | C   |
| ATOM | 2690 | C   | ILE | C | 343 | 3.753  | 30.199 | -6.419  | 1.00 | 44.38 | C   |
| ATOM | 2691 | O   | ILE | C | 343 | 3.133  | 30.439 | -5.387  | 1.00 | 43.68 | O   |
| ATOM | 2692 | CB  | ILE | C | 343 | 5.950  | 30.758 | -5.334  | 1.00 | 47.47 | C   |
| ATOM | 2693 | CG1 | ILE | C | 343 | 7.319  | 31.428 | -5.468  | 1.00 | 48.43 | C   |
| ATOM | 2694 | CG2 | ILE | C | 343 | 6.083  | 29.321 | -4.849  | 1.00 | 47.06 | C   |
| ATOM | 2695 | CD1 | ILE | C | 343 | 8.065  | 31.574 | -4.166  | 1.00 | 49.36 | C   |
| ATOM | 2696 | N   | GLN | C | 344 | 3.282  | 29.436 | -7.403  | 1.00 | 48.52 | N   |
| ATOM | 2697 | CA  | GLN | C | 344 | 1.870  | 29.028 | -7.452  | 1.00 | 49.50 | C   |
| ATOM | 2698 | C   | GLN | C | 344 | 1.636  | 27.823 | -6.536  | 1.00 | 43.15 | C   |
| ATOM | 2699 | O   | GLN | C | 344 | 2.483  | 26.972 | -6.440  | 1.00 | 43.61 | O   |
| ATOM | 2700 | CB  | GLN | C | 344 | 1.430  | 28.722 | -8.888  | 1.00 | 47.84 | C   |
| ATOM | 2701 | CG  | GLN | C | 344 | -0.042 | 28.329 | -8.978  | 1.00 | 46.71 | C   |
| ATOM | 2702 | CD  | GLN | C | 344 | -0.758 | 28.893 | -10.180 | 1.00 | 51.38 | C   |
| ATOM | 2703 | NE2 | GLN | C | 344 | -2.076 | 28.983 | -10.066 | 1.00 | 42.55 | N   |
| ATOM | 2704 | OE1 | GLN | C | 344 | -0.147 | 29.243 | -11.200 | 1.00 | 59.47 | O   |
| ATOM | 2705 | N   | GLY | C | 345 | 0.466  | 27.799 | -5.886  | 1.00 | 47.88 | N   |
| ATOM | 2706 | CA  | GLY | C | 345 | -0.062 | 26.651 | -5.149  | 1.00 | 53.04 | C   |
| ATOM | 2707 | C   | GLY | C | 345 | -0.334 | 25.448 | -6.056  | 1.00 | 56.85 | C   |
| ATOM | 2708 | O   | GLY | C | 345 | -0.189 | 25.503 | -7.279  | 1.00 | 55.88 | O   |
| ATOM | 2709 | N   | GLY | C | 346 | -0.728 | 24.337 | -5.431  | 1.00 | 58.31 | N   |
| ATOM | 2710 | CA  | GLY | C | 346 | -1.024 | 23.101 | -6.111  | 1.00 | 50.28 | C   |
| ATOM | 2711 | C   | GLY | C | 346 | -2.454 | 23.077 | -6.605  | 1.00 | 47.65 | C   |
| ATOM | 2712 | O   | GLY | C | 346 | -3.193 | 23.987 | -6.376  | 1.00 | 44.84 | O   |



|      |      |     |     |   |     |        |        |         |      |       |   |
|------|------|-----|-----|---|-----|--------|--------|---------|------|-------|---|
| ATOM | 2713 | N   | PHE | C | 347 | -2.837 | 21.957 | -7.213  | 1.00 | 49.06 | N |
| ATOM | 2714 | CA  | PHE | C | 347 | -3.998 | 21.811 | -8.062  | 1.00 | 50.50 | C |
| ATOM | 2715 | C   | PHE | C | 347 | -4.186 | 20.315 | -8.381  | 1.00 | 52.45 | C |
| ATOM | 2716 | O   | PHE | C | 347 | -3.211 | 19.571 | -8.564  | 1.00 | 49.85 | O |
| ATOM | 2717 | CB  | PHE | C | 347 | -3.824 | 22.652 | -9.333  | 1.00 | 48.91 | C |
| ATOM | 2718 | CG  | PHE | C | 347 | -5.026 | 22.693 | -10.240 | 1.00 | 47.91 | C |
| ATOM | 2719 | CD1 | PHE | C | 347 | -6.231 | 23.222 | -9.788  | 1.00 | 44.50 | C |
| ATOM | 2720 | CD2 | PHE | C | 347 | -4.947 | 22.226 | -11.547 | 1.00 | 48.20 | C |
| ATOM | 2721 | CE1 | PHE | C | 347 | -7.341 | 23.269 | -10.611 | 1.00 | 42.51 | C |
| ATOM | 2722 | CE2 | PHE | C | 347 | -6.052 | 22.290 | -12.382 | 1.00 | 48.84 | C |
| ATOM | 2723 | CZ  | PHE | C | 347 | -7.245 | 22.808 | -11.908 | 1.00 | 52.64 | C |
| ATOM | 2724 | N   | GLY | C | 348 | -5.450 | 19.878 | -8.431  | 1.00 | 55.49 | N |
| ATOM | 2725 | CA  | GLY | C | 348 | -5.777 | 18.484 | -8.683  | 1.00 | 56.05 | C |
| ATOM | 2726 | C   | GLY | C | 348 | -5.090 | 17.590 | -7.661  | 1.00 | 50.87 | C |
| ATOM | 2727 | O   | GLY | C | 348 | -5.236 | 17.853 | -6.475  | 1.00 | 50.39 | O |
| ATOM | 2728 | N   | PRO | C | 349 | -4.274 | 16.582 | -8.065  | 1.00 | 47.25 | N |
| ATOM | 2729 | CA  | PRO | C | 349 | -3.621 | 15.680 | -7.109  | 1.00 | 46.31 | C |
| ATOM | 2730 | C   | PRO | C | 349 | -2.632 | 16.346 | -6.142  | 1.00 | 51.01 | C |
| ATOM | 2731 | O   | PRO | C | 349 | -2.104 | 15.693 | -5.256  | 1.00 | 65.27 | O |
| ATOM | 2732 | CB  | PRO | C | 349 | -2.879 | 14.688 | -8.012  | 1.00 | 44.88 | C |
| ATOM | 2733 | CG  | PRO | C | 349 | -2.678 | 15.437 | -9.296  | 1.00 | 45.25 | C |
| ATOM | 2734 | CD  | PRO | C | 349 | -3.947 | 16.242 | -9.455  | 1.00 | 45.47 | C |
| ATOM | 2735 | N   | THR | C | 350 | -2.438 | 17.657 | -6.291  | 1.00 | 54.63 | N |
| ATOM | 2736 | CA  | THR | C | 350 | -1.329 | 18.396 | -5.708  | 1.00 | 49.77 | C |
| ATOM | 2737 | C   | THR | C | 350 | -1.912 | 19.516 | -4.817  | 1.00 | 49.90 | C |
| ATOM | 2738 | O   | THR | C | 350 | -1.193 | 20.262 | -4.174  | 1.00 | 51.99 | O |
| ATOM | 2739 | CB  | THR | C | 350 | -0.412 | 18.684 | -6.911  | 1.00 | 48.13 | C |
| ATOM | 2740 | CG2 | THR | C | 350 | -0.322 | 20.128 | -7.336  | 1.00 | 44.19 | C |
| ATOM | 2741 | OG1 | THR | C | 350 | 0.900  | 18.153 | -6.716  | 1.00 | 52.68 | O |
| ATOM | 2742 | N   | MET | C | 351 | -3.244 | 19.600 | -4.737  | 1.00 | 48.84 | N |
| ATOM | 2743 | CA  | MET | C | 351 | -3.922 | 20.575 | -3.901  | 1.00 | 55.58 | C |
| ATOM | 2744 | C   | MET | C | 351 | -3.465 | 20.374 | -2.455  | 1.00 | 57.66 | C |
| ATOM | 2745 | O   | MET | C | 351 | -3.593 | 19.278 | -1.896  | 1.00 | 58.33 | O |

|      |      |     |     |   |     |        |        |        |      |       |   |
|------|------|-----|-----|---|-----|--------|--------|--------|------|-------|---|
| ATOM | 2746 | CB  | MET | C | 351 | -5.455 | 20.457 | -3.964 | 1.00 | 59.78 | C |
| ATOM | 2747 | CG  | MET | C | 351 | -6.200 | 21.586 | -3.246 | 1.00 | 58.65 | C |
| ATOM | 2748 | SD  | MET | C | 351 | -5.848 | 23.224 | -3.973 | 1.00 | 73.55 | S |
| ATOM | 2749 | CE  | MET | C | 351 | -5.164 | 24.113 | -2.568 | 1.00 | 75.87 | C |
| ATOM | 2750 | N   | GLY | C | 352 | -2.898 | 21.449 | -1.897 | 1.00 | 57.20 | N |
| ATOM | 2751 | CA  | GLY | C | 352 | -2.567 | 21.568 | -0.502 | 1.00 | 50.97 | C |
| ATOM | 2752 | C   | GLY | C | 352 | -1.270 | 20.858 | -0.133 | 1.00 | 50.34 | C |
| ATOM | 2753 | O   | GLY | C | 352 | -0.902 | 20.868 | 1.031  | 1.00 | 43.34 | O |
| ATOM | 2754 | N   | ILE | C | 353 | -0.580 | 20.230 | -1.095 | 1.00 | 51.10 | N |
| ATOM | 2755 | CA  | ILE | C | 353 | 0.606  | 19.421 | -0.746 | 1.00 | 52.50 | C |
| ATOM | 2756 | C   | ILE | C | 353 | 1.852  | 19.919 | -1.489 | 1.00 | 53.03 | C |
| ATOM | 2757 | O   | ILE | C | 353 | 2.962  | 19.760 | -0.982 | 1.00 | 56.41 | O |
| ATOM | 2758 | CB  | ILE | C | 353 | 0.367  | 17.901 | -0.927 | 1.00 | 53.34 | C |
| ATOM | 2759 | CG1 | ILE | C | 353 | 0.040  | 17.514 | -2.369 | 1.00 | 58.77 | C |
| ATOM | 2760 | CG2 | ILE | C | 353 | -0.699 | 17.385 | 0.038  | 1.00 | 48.03 | C |
| ATOM | 2761 | CD1 | ILE | C | 353 | -0.062 | 16.006 | -2.571 | 1.00 | 60.19 | C |
| ATOM | 2762 | N   | ALA | C | 354 | 1.680  | 20.552 | -2.656 | 1.00 | 54.90 | N |
| ATOM | 2763 | CA  | ALA | C | 354 | 2.824  | 21.050 | -3.418 | 1.00 | 51.04 | C |
| ATOM | 2764 | C   | ALA | C | 354 | 2.580  | 22.472 | -3.930 | 1.00 | 47.09 | C |
| ATOM | 2765 | O   | ALA | C | 354 | 1.450  | 22.909 | -4.069 | 1.00 | 59.06 | O |
| ATOM | 2766 | CB  | ALA | C | 354 | 3.122  | 20.111 | -4.551 | 1.00 | 50.21 | C |
| ATOM | 2767 | N   | TRP | C | 355 | 3.681  | 23.190 | -4.151 | 1.00 | 42.96 | N |
| ATOM | 2768 | CA  | TRP | C | 355 | 3.741  | 24.316 | -5.055 | 1.00 | 39.05 | C |
| ATOM | 2769 | C   | TRP | C | 355 | 4.098  | 23.764 | -6.439 | 1.00 | 40.71 | C |
| ATOM | 2770 | O   | TRP | C | 355 | 4.638  | 22.636 | -6.522 | 1.00 | 40.23 | O |
| ATOM | 2771 | CB  | TRP | C | 355 | 4.803  | 25.337 | -4.627 | 1.00 | 40.43 | C |
| ATOM | 2772 | CG  | TRP | C | 355 | 4.721  | 25.975 | -3.265 | 1.00 | 43.31 | C |
| ATOM | 2773 | CD1 | TRP | C | 355 | 4.029  | 27.099 | -2.929 | 1.00 | 45.75 | C |
| ATOM | 2774 | CD2 | TRP | C | 355 | 5.483  | 25.628 | -2.092 | 1.00 | 42.10 | C |
| ATOM | 2775 | CE2 | TRP | C | 355 | 5.157  | 26.565 | -1.090 | 1.00 | 45.06 | C |
| ATOM | 2776 | CE3 | TRP | C | 355 | 6.385  | 24.602 | -1.779 | 1.00 | 42.41 | C |
| ATOM | 2777 | NE1 | TRP | C | 355 | 4.273  | 27.452 | -1.631 | 1.00 | 45.86 | N |
| ATOM | 2778 | CZ2 | TRP | C | 355 | 5.697  | 26.499 | 0.197  | 1.00 | 46.64 | C |

|      |      |     |     |   |     |        |        |         |      |       |     |
|------|------|-----|-----|---|-----|--------|--------|---------|------|-------|-----|
| ATOM | 2779 | CZ3 | TRP | C | 355 | 6.920  | 24.532 | -0.507  | 1.00 | 40.39 | C   |
| ATOM | 2780 | CH2 | TRP | C | 355 | 6.583  | 25.470 | 0.463   | 1.00 | 41.52 | C   |
| ATOM | 2781 | N   | ARG | C | 356 | 3.874  | 24.563 | -7.498  | 1.00 | 36.28 | N   |
| ATOM | 2782 | CA  | ARG | C | 356 | 4.118  | 24.116 | -8.877  | 1.00 | 36.85 | C   |
| ATOM | 2783 | C   | ARG | C | 356 | 5.078  | 25.080 | -9.594  | 1.00 | 38.61 | C   |
| ATOM | 2784 | O   | ARG | C | 356 | 4.793  | 26.275 | -9.786  | 1.00 | 38.29 | O   |
| ATOM | 2785 | CB  | ARG | C | 356 | 2.773  | 23.982 | -9.593  | 1.00 | 39.48 | C   |
| ATOM | 2786 | CG  | ARG | C | 356 | 1.783  | 23.093 | -8.851  | 1.00 | 40.02 | C   |
| ATOM | 2787 | CD  | ARG | C | 356 | 0.531  | 22.785 | -9.632  | 1.00 | 40.30 | C   |
| ATOM | 2788 | NE  | ARG | C | 356 | -0.353 | 23.929 | -9.792  | 1.00 | 41.71 | N   |
| ATOM | 2789 | CZ  | ARG | C | 356 | -1.063 | 24.161 | -10.884 | 1.00 | 40.49 | C   |
| ATOM | 2790 | NH1 | ARG | C | 356 | -0.971 | 23.330 | -11.911 | 1.00 | 45.34 | N1+ |
| ATOM | 2791 | NH2 | ARG | C | 356 | -1.830 | 25.228 | -10.961 | 1.00 | 41.21 | N   |
| ATOM | 2792 | N   | ALA | C | 357 | 6.237  | 24.558 | -9.994  | 1.00 | 37.10 | N   |
| ATOM | 2793 | CA  | ALA | C | 357 | 7.294  | 25.402 | -10.458 | 1.00 | 39.56 | C   |
| ATOM | 2794 | C   | ALA | C | 357 | 7.426  | 25.303 | -11.986 | 1.00 | 41.29 | C   |
| ATOM | 2795 | O   | ALA | C | 357 | 7.721  | 24.237 | -12.530 | 1.00 | 42.12 | O   |
| ATOM | 2796 | CB  | ALA | C | 357 | 8.556  | 25.034 | -9.742  | 1.00 | 43.41 | C   |
| ATOM | 2797 | N   | GLY | C | 358 | 7.223  | 26.448 | -12.654 | 1.00 | 40.45 | N   |
| ATOM | 2798 | CA  | GLY | C | 358 | 7.150  | 26.532 | -14.080 | 1.00 | 40.07 | C   |
| ATOM | 2799 | C   | GLY | C | 358 | 8.473  | 26.876 | -14.724 | 1.00 | 39.34 | C   |
| ATOM | 2800 | O   | GLY | C | 358 | 9.157  | 27.829 | -14.320 | 1.00 | 36.71 | O   |
| ATOM | 2801 | N   | ILE | C | 359 | 8.809  | 26.127 | -15.775 | 1.00 | 38.06 | N   |
| ATOM | 2802 | CA  | ILE | C | 359 | 9.906  | 26.512 | -16.653 | 1.00 | 40.98 | C   |
| ATOM | 2803 | C   | ILE | C | 359 | 9.387  | 26.622 | -18.093 | 1.00 | 37.45 | C   |
| ATOM | 2804 | O   | ILE | C | 359 | 9.453  | 25.695 | -18.855 | 1.00 | 36.98 | O   |
| ATOM | 2805 | CB  | ILE | C | 359 | 11.079 | 25.534 | -16.493 | 1.00 | 43.35 | C   |
| ATOM | 2806 | CG1 | ILE | C | 359 | 11.490 | 25.440 | -15.021 | 1.00 | 45.53 | C   |
| ATOM | 2807 | CG2 | ILE | C | 359 | 12.254 | 25.918 | -17.387 | 1.00 | 42.86 | C   |
| ATOM | 2808 | CD1 | ILE | C | 359 | 12.712 | 24.565 | -14.791 | 1.00 | 48.88 | C   |
| ATOM | 2809 | N   | MET | C | 360 | 8.890  | 27.809 | -18.436 | 1.00 | 36.36 | N   |
| ATOM | 2810 | CA  | MET | C | 360 | 8.113  | 28.032 | -19.645 | 1.00 | 36.50 | C   |
| ATOM | 2811 | C   | MET | C | 360 | 8.325  | 29.464 | -20.155 | 1.00 | 36.77 | C   |

|      |      |     |     |   |     |        |        |         |      |       |     |
|------|------|-----|-----|---|-----|--------|--------|---------|------|-------|-----|
| ATOM | 2812 | O   | MET | C | 360 | 8.520  | 30.400 | -19.370 | 1.00 | 38.92 | O   |
| ATOM | 2813 | CB  | MET | C | 360 | 6.629  | 27.862 | -19.319 | 1.00 | 34.70 | C   |
| ATOM | 2814 | CG  | MET | C | 360 | 6.263  | 26.467 | -18.977 | 1.00 | 36.38 | C   |
| ATOM | 2815 | SD  | MET | C | 360 | 4.496  | 26.398 | -18.660 | 1.00 | 38.27 | S   |
| ATOM | 2816 | CE  | MET | C | 360 | 4.291  | 24.641 | -18.404 | 1.00 | 41.58 | C   |
| ATOM | 2817 | N   | GLY | C | 361 | 8.245  | 29.648 | -21.471 | 1.00 | 37.16 | N   |
| ATOM | 2818 | CA  | GLY | C | 361 | 8.403  | 30.974 | -22.050 | 1.00 | 39.00 | C   |
| ATOM | 2819 | C   | GLY | C | 361 | 9.712  | 31.596 | -21.607 | 1.00 | 40.39 | C   |
| ATOM | 2820 | O   | GLY | C | 361 | 10.692 | 30.895 | -21.526 | 1.00 | 40.92 | O   |
| ATOM | 2821 | N   | GLU | C | 362 | 9.717  | 32.901 | -21.308 | 1.00 | 41.32 | N   |
| ATOM | 2822 | CA  | GLU | C | 362 | 10.993 | 33.665 | -21.225 | 1.00 | 43.75 | C   |
| ATOM | 2823 | C   | GLU | C | 362 | 11.726 | 33.390 | -19.910 | 1.00 | 44.39 | C   |
| ATOM | 2824 | O   | GLU | C | 362 | 12.899 | 33.750 | -19.789 | 1.00 | 42.47 | O   |
| ATOM | 2825 | CB  | GLU | C | 362 | 10.784 | 35.173 | -21.366 | 1.00 | 44.78 | C   |
| ATOM | 2826 | CG  | GLU | C | 362 | 10.575 | 35.614 | -22.790 | 1.00 | 47.46 | C   |
| ATOM | 2827 | CD  | GLU | C | 362 | 11.817 | 35.579 | -23.655 | 1.00 | 53.16 | C   |
| ATOM | 2828 | OE1 | GLU | C | 362 | 12.606 | 36.550 | -23.569 | 1.00 | 54.47 | O   |
| ATOM | 2829 | OE2 | GLU | C | 362 | 11.976 | 34.591 | -24.428 | 1.00 | 52.00 | O1- |
| ATOM | 2830 | N   | SER | C | 363 | 11.058 | 32.744 | -18.949 | 1.00 | 42.76 | N   |
| ATOM | 2831 | CA  | SER | C | 363 | 11.723 | 32.371 | -17.717 | 1.00 | 44.60 | C   |
| ATOM | 2832 | C   | SER | C | 363 | 12.329 | 30.968 | -17.838 | 1.00 | 43.80 | C   |
| ATOM | 2833 | O   | SER | C | 363 | 12.555 | 30.319 | -16.824 | 1.00 | 45.48 | O   |
| ATOM | 2834 | CB  | SER | C | 363 | 10.802 | 32.509 | -16.525 | 1.00 | 44.03 | C   |
| ATOM | 2835 | OG  | SER | C | 363 | 10.458 | 33.886 | -16.312 | 1.00 | 44.44 | O   |
| ATOM | 2836 | N   | SER | C | 364 | 12.628 | 30.532 | -19.071 | 1.00 | 41.02 | N   |
| ATOM | 2837 | CA  | SER | C | 364 | 13.350 | 29.268 | -19.346 | 1.00 | 41.44 | C   |
| ATOM | 2838 | C   | SER | C | 364 | 14.858 | 29.530 | -19.455 | 1.00 | 42.20 | C   |
| ATOM | 2839 | O   | SER | C | 364 | 15.469 | 29.226 | -20.466 | 1.00 | 45.39 | O   |
| ATOM | 2840 | CB  | SER | C | 364 | 12.850 | 28.640 | -20.603 | 1.00 | 36.31 | C   |
| ATOM | 2841 | OG  | SER | C | 364 | 11.484 | 28.318 | -20.479 | 1.00 | 41.54 | O   |
| ATOM | 2842 | N   | THR | C | 365 | 15.442 | 30.148 | -18.427 | 1.00 | 40.64 | N   |
| ATOM | 2843 | CA  | THR | C | 365 | 16.866 | 30.484 | -18.422 | 1.00 | 39.56 | C   |
| ATOM | 2844 | C   | THR | C | 365 | 17.477 | 30.031 | -17.090 | 1.00 | 37.73 | C   |

|      |      |     |     |   |     |        |        |         |      |       |     |
|------|------|-----|-----|---|-----|--------|--------|---------|------|-------|-----|
| ATOM | 2845 | O   | THR | C | 365 | 16.786 | 30.001 | -16.059 | 1.00 | 33.91 | O   |
| ATOM | 2846 | CB  | THR | C | 365 | 17.133 | 31.974 | -18.699 | 1.00 | 37.83 | C   |
| ATOM | 2847 | CG2 | THR | C | 365 | 16.484 | 32.473 | -19.971 | 1.00 | 35.41 | C   |
| ATOM | 2848 | OG1 | THR | C | 365 | 16.661 | 32.751 | -17.602 | 1.00 | 42.01 | O   |
| ATOM | 2849 | N   | LEU | C | 366 | 18.757 | 29.644 | -17.167 | 1.00 | 38.34 | N   |
| ATOM | 2850 | CA  | LEU | C | 366 | 19.590 | 29.341 | -16.020 | 1.00 | 41.86 | C   |
| ATOM | 2851 | C   | LEU | C | 366 | 19.467 | 30.459 | -14.984 | 1.00 | 37.38 | C   |
| ATOM | 2852 | O   | LEU | C | 366 | 19.285 | 30.192 | -13.823 | 1.00 | 36.42 | O   |
| ATOM | 2853 | CB  | LEU | C | 366 | 21.040 | 29.206 | -16.487 | 1.00 | 50.74 | C   |
| ATOM | 2854 | CG  | LEU | C | 366 | 21.764 | 27.955 | -16.003 | 1.00 | 62.16 | C   |
| ATOM | 2855 | CD1 | LEU | C | 366 | 23.045 | 27.738 | -16.805 | 1.00 | 66.22 | C   |
| ATOM | 2856 | CD2 | LEU | C | 366 | 22.040 | 28.030 | -14.502 | 1.00 | 63.25 | C   |
| ATOM | 2857 | N   | GLN | C | 367 | 19.534 | 31.709 | -15.453 | 1.00 | 39.13 | N   |
| ATOM | 2858 | CA  | GLN | C | 367 | 19.458 | 32.911 | -14.604 | 1.00 | 40.80 | C   |
| ATOM | 2859 | C   | GLN | C | 367 | 18.098 | 32.999 | -13.911 | 1.00 | 35.77 | C   |
| ATOM | 2860 | O   | GLN | C | 367 | 18.056 | 33.416 | -12.785 | 1.00 | 43.22 | O   |
| ATOM | 2861 | CB  | GLN | C | 367 | 19.704 | 34.211 | -15.385 | 1.00 | 38.13 | C   |
| ATOM | 2862 | CG  | GLN | C | 367 | 21.089 | 34.269 | -16.018 | 1.00 | 39.32 | C   |
| ATOM | 2863 | CD  | GLN | C | 367 | 21.074 | 33.805 | -17.455 | 1.00 | 38.93 | C   |
| ATOM | 2864 | NE2 | GLN | C | 367 | 21.886 | 34.437 | -18.272 | 1.00 | 30.98 | N   |
| ATOM | 2865 | OE1 | GLN | C | 367 | 20.305 | 32.926 | -17.841 | 1.00 | 44.67 | O   |
| ATOM | 2866 | N   | ARG | C | 368 | 17.005 | 32.639 | -14.591 | 1.00 | 33.47 | N   |
| ATOM | 2867 | CA  | ARG | C | 368 | 15.680 | 32.767 | -13.990 | 1.00 | 35.16 | C   |
| ATOM | 2868 | C   | ARG | C | 368 | 15.439 | 31.671 | -12.954 | 1.00 | 36.40 | C   |
| ATOM | 2869 | O   | ARG | C | 368 | 14.796 | 31.937 | -11.950 | 1.00 | 37.88 | O   |
| ATOM | 2870 | CB  | ARG | C | 368 | 14.573 | 32.760 | -15.041 | 1.00 | 37.23 | C   |
| ATOM | 2871 | CG  | ARG | C | 368 | 14.330 | 34.134 | -15.645 | 1.00 | 38.91 | C   |
| ATOM | 2872 | CD  | ARG | C | 368 | 13.511 | 35.014 | -14.722 | 1.00 | 38.87 | C   |
| ATOM | 2873 | NE  | ARG | C | 368 | 13.553 | 36.406 | -15.133 | 1.00 | 39.45 | N   |
| ATOM | 2874 | CZ  | ARG | C | 368 | 12.681 | 36.994 | -15.931 | 1.00 | 38.62 | C   |
| ATOM | 2875 | NH1 | ARG | C | 368 | 11.579 | 36.363 | -16.319 | 1.00 | 43.15 | N1+ |
| ATOM | 2876 | NH2 | ARG | C | 368 | 12.933 | 38.223 | -16.337 | 1.00 | 37.60 | N   |
| ATOM | 2877 | N   | VAL | C | 369 | 15.955 | 30.458 | -13.209 | 1.00 | 39.76 | N   |

|      |      |     |     |   |     |        |        |         |      |       |   |
|------|------|-----|-----|---|-----|--------|--------|---------|------|-------|---|
| ATOM | 2878 | CA  | VAL | C | 369 | 15.839 | 29.338 | -12.266 | 1.00 | 39.83 | C |
| ATOM | 2879 | C   | VAL | C | 369 | 16.596 | 29.683 | -10.971 | 1.00 | 39.07 | C |
| ATOM | 2880 | O   | VAL | C | 369 | 16.087 | 29.489 | -9.890  | 1.00 | 36.84 | O |
| ATOM | 2881 | CB  | VAL | C | 369 | 16.338 | 28.024 | -12.892 | 1.00 | 41.64 | C |
| ATOM | 2882 | CG1 | VAL | C | 369 | 16.281 | 26.871 | -11.904 | 1.00 | 42.89 | C |
| ATOM | 2883 | CG2 | VAL | C | 369 | 15.550 | 27.660 | -14.137 | 1.00 | 43.58 | C |
| ATOM | 2884 | N   | ASN | C | 370 | 17.813 | 30.214 | -11.113 | 1.00 | 40.16 | N |
| ATOM | 2885 | CA  | ASN | C | 370 | 18.687 | 30.586 | -9.988  | 1.00 | 40.57 | C |
| ATOM | 2886 | C   | ASN | C | 370 | 18.030 | 31.672 | -9.136  | 1.00 | 41.33 | C |
| ATOM | 2887 | O   | ASN | C | 370 | 18.167 | 31.664 | -7.906  | 1.00 | 43.62 | O |
| ATOM | 2888 | CB  | ASN | C | 370 | 20.070 | 31.043 | -10.463 | 1.00 | 37.03 | C |
| ATOM | 2889 | CG  | ASN | C | 370 | 20.919 | 29.869 | -10.872 | 1.00 | 33.32 | C |
| ATOM | 2890 | ND2 | ASN | C | 370 | 21.719 | 30.030 | -11.903 | 1.00 | 35.76 | N |
| ATOM | 2891 | OD1 | ASN | C | 370 | 20.820 | 28.808 | -10.283 | 1.00 | 36.65 | O |
| ATOM | 2892 | N   | PHE | C | 371 | 17.298 | 32.578 | -9.788  | 1.00 | 38.44 | N |
| ATOM | 2893 | CA  | PHE | C | 371 | 16.492 | 33.560 | -9.076  | 1.00 | 38.71 | C |
| ATOM | 2894 | C   | PHE | C | 371 | 15.323 | 32.895 | -8.318  | 1.00 | 41.55 | C |
| ATOM | 2895 | O   | PHE | C | 371 | 15.068 | 33.244 | -7.172  | 1.00 | 41.84 | O |
| ATOM | 2896 | CB  | PHE | C | 371 | 15.960 | 34.610 | -10.051 | 1.00 | 38.79 | C |
| ATOM | 2897 | CG  | PHE | C | 371 | 15.205 | 35.685 | -9.323  | 1.00 | 37.84 | C |
| ATOM | 2898 | CD1 | PHE | C | 371 | 15.871 | 36.540 | -8.470  | 1.00 | 39.88 | C |
| ATOM | 2899 | CD2 | PHE | C | 371 | 13.834 | 35.783 | -9.417  | 1.00 | 36.75 | C |
| ATOM | 2900 | CE1 | PHE | C | 371 | 15.186 | 37.508 | -7.761  | 1.00 | 38.83 | C |
| ATOM | 2901 | CE2 | PHE | C | 371 | 13.151 | 36.757 | -8.713  | 1.00 | 37.32 | C |
| ATOM | 2902 | CZ  | PHE | C | 371 | 13.831 | 37.608 | -7.881  | 1.00 | 36.89 | C |
| ATOM | 2903 | N   | TYR | C | 372 | 14.618 | 31.952 | -8.971  | 1.00 | 40.49 | N |
| ATOM | 2904 | CA  | TYR | C | 372 | 13.477 | 31.220 | -8.386  | 1.00 | 43.79 | C |
| ATOM | 2905 | C   | TYR | C | 372 | 13.944 | 30.536 | -7.095  | 1.00 | 40.81 | C |
| ATOM | 2906 | O   | TYR | C | 372 | 13.334 | 30.673 | -6.030  | 1.00 | 41.11 | O |
| ATOM | 2907 | CB  | TYR | C | 372 | 12.859 | 30.220 | -9.387  | 1.00 | 44.80 | C |
| ATOM | 2908 | CG  | TYR | C | 372 | 11.564 | 29.578 | -8.936  | 1.00 | 43.74 | C |
| ATOM | 2909 | CD1 | TYR | C | 372 | 11.562 | 28.505 | -8.060  | 1.00 | 42.31 | C |
| ATOM | 2910 | CD2 | TYR | C | 372 | 10.326 | 30.069 | -9.333  | 1.00 | 48.80 | C |

|      |      |     |     |   |     |        |        |        |      |       |   |
|------|------|-----|-----|---|-----|--------|--------|--------|------|-------|---|
| ATOM | 2911 | CE1 | TYR | C | 372 | 10.381 | 27.927 | -7.611 | 1.00 | 41.54 | C |
| ATOM | 2912 | CE2 | TYR | C | 372 | 9.131  | 29.503 | -8.895 | 1.00 | 46.20 | C |
| ATOM | 2913 | CZ  | TYR | C | 372 | 9.160  | 28.416 | -8.036 | 1.00 | 45.68 | C |
| ATOM | 2914 | OH  | TYR | C | 372 | 8.004  | 27.851 | -7.575 | 1.00 | 48.30 | O |
| ATOM | 2915 | N   | LEU | C | 373 | 15.045 | 29.802 | -7.195 | 1.00 | 38.87 | N |
| ATOM | 2916 | CA  | LEU | C | 373 | 15.569 | 29.078 | -6.039 | 1.00 | 42.53 | C |
| ATOM | 2917 | C   | LEU | C | 373 | 15.855 | 30.064 | -4.901 | 1.00 | 42.09 | C |
| ATOM | 2918 | O   | LEU | C | 373 | 15.415 | 29.845 | -3.781 | 1.00 | 38.11 | O |
| ATOM | 2919 | CB  | LEU | C | 373 | 16.830 | 28.317 | -6.450 | 1.00 | 40.31 | C |
| ATOM | 2920 | CG  | LEU | C | 373 | 16.603 | 27.156 | -7.421 | 1.00 | 40.48 | C |
| ATOM | 2921 | CD1 | LEU | C | 373 | 17.912 | 26.703 | -8.046 | 1.00 | 42.28 | C |
| ATOM | 2922 | CD2 | LEU | C | 373 | 15.930 | 25.985 | -6.728 | 1.00 | 40.41 | C |
| ATOM | 2923 | N   | TYR | C | 374 | 16.583 | 31.140 | -5.222 | 1.00 | 42.85 | N |
| ATOM | 2924 | CA  | TYR | C | 374 | 16.971 | 32.155 | -4.240 | 1.00 | 45.72 | C |
| ATOM | 2925 | C   | TYR | C | 374 | 15.728 | 32.666 | -3.498 | 1.00 | 48.21 | C |
| ATOM | 2926 | O   | TYR | C | 374 | 15.649 | 32.627 | -2.267 | 1.00 | 49.87 | O |
| ATOM | 2927 | CB  | TYR | C | 374 | 17.682 | 33.334 | -4.916 | 1.00 | 41.76 | C |
| ATOM | 2928 | CG  | TYR | C | 374 | 17.931 | 34.529 | -4.020 | 1.00 | 40.31 | C |
| ATOM | 2929 | CD1 | TYR | C | 374 | 18.999 | 34.552 | -3.131 | 1.00 | 39.70 | C |
| ATOM | 2930 | CD2 | TYR | C | 374 | 17.127 | 35.660 | -4.086 | 1.00 | 39.52 | C |
| ATOM | 2931 | CE1 | TYR | C | 374 | 19.232 | 35.635 | -2.294 | 1.00 | 38.75 | C |
| ATOM | 2932 | CE2 | TYR | C | 374 | 17.361 | 36.761 | -3.274 | 1.00 | 41.71 | C |
| ATOM | 2933 | CZ  | TYR | C | 374 | 18.409 | 36.747 | -2.366 | 1.00 | 40.11 | C |
| ATOM | 2934 | OH  | TYR | C | 374 | 18.664 | 37.843 | -1.594 | 1.00 | 38.15 | O |
| ATOM | 2935 | N   | ALA | C | 375 | 14.769 | 33.139 | -4.290 | 1.00 | 44.52 | N |
| ATOM | 2936 | CA  | ALA | C | 375 | 13.635 | 33.886 | -3.835 | 1.00 | 43.19 | C |
| ATOM | 2937 | C   | ALA | C | 375 | 12.714 | 33.013 | -2.976 | 1.00 | 43.47 | C |
| ATOM | 2938 | O   | ALA | C | 375 | 12.171 | 33.492 | -1.974 | 1.00 | 39.41 | O |
| ATOM | 2939 | CB  | ALA | C | 375 | 12.912 | 34.416 | -5.055 | 1.00 | 45.58 | C |
| ATOM | 2940 | N   | PHE | C | 376 | 12.488 | 31.772 | -3.438 | 1.00 | 46.56 | N |
| ATOM | 2941 | CA  | PHE | C | 376 | 11.729 | 30.737 | -2.729 | 1.00 | 46.71 | C |
| ATOM | 2942 | C   | PHE | C | 376 | 12.340 | 30.535 | -1.341 | 1.00 | 49.89 | C |
| ATOM | 2943 | O   | PHE | C | 376 | 11.603 | 30.526 | -0.349 | 1.00 | 47.71 | O |

|      |      |     |     |   |     |        |        |        |      |       |     |
|------|------|-----|-----|---|-----|--------|--------|--------|------|-------|-----|
| ATOM | 2944 | CB  | PHE | C | 376 | 11.734 | 29.436 | -3.537 | 1.00 | 47.73 | C   |
| ATOM | 2945 | CG  | PHE | C | 376 | 11.018 | 28.259 | -2.921 | 1.00 | 50.35 | C   |
| ATOM | 2946 | CD1 | PHE | C | 376 | 9.827  | 28.404 | -2.233 | 1.00 | 59.42 | C   |
| ATOM | 2947 | CD2 | PHE | C | 376 | 11.508 | 26.975 | -3.087 | 1.00 | 59.30 | C   |
| ATOM | 2948 | CE1 | PHE | C | 376 | 9.165  | 27.304 | -1.699 | 1.00 | 58.46 | C   |
| ATOM | 2949 | CE2 | PHE | C | 376 | 10.844 | 25.874 | -2.557 | 1.00 | 60.36 | C   |
| ATOM | 2950 | CZ  | PHE | C | 376 | 9.669  | 26.039 | -1.871 | 1.00 | 55.57 | C   |
| ATOM | 2951 | N   | LYS | C | 377 | 13.683 | 30.407 | -1.297 | 1.00 | 48.86 | N   |
| ATOM | 2952 | CA  | LYS | C | 377 | 14.423 | 30.098 | -0.078 | 1.00 | 48.49 | C   |
| ATOM | 2953 | C   | LYS | C | 377 | 14.345 | 31.277 | 0.886  | 1.00 | 48.73 | C   |
| ATOM | 2954 | O   | LYS | C | 377 | 14.099 | 31.055 | 2.040  | 1.00 | 49.81 | O   |
| ATOM | 2955 | CB  | LYS | C | 377 | 15.903 | 29.804 | -0.326 | 1.00 | 48.93 | C   |
| ATOM | 2956 | CG  | LYS | C | 377 | 16.698 | 29.512 | 0.941  | 1.00 | 47.33 | C   |
| ATOM | 2957 | CD  | LYS | C | 377 | 18.122 | 29.062 | 0.697  | 1.00 | 51.16 | C   |
| ATOM | 2958 | CE  | LYS | C | 377 | 18.845 | 28.651 | 1.967  | 1.00 | 58.81 | C   |
| ATOM | 2959 | NZ  | LYS | C | 377 | 19.795 | 27.530 | 1.733  | 1.00 | 62.68 | N1+ |
| ATOM | 2960 | N   | GLU | C | 378 | 14.623 | 32.494 | 0.392  | 1.00 | 48.80 | N   |
| ATOM | 2961 | CA  | GLU | C | 378 | 14.529 | 33.731 | 1.178  | 1.00 | 46.38 | C   |
| ATOM | 2962 | C   | GLU | C | 378 | 13.109 | 33.882 | 1.735  | 1.00 | 47.63 | C   |
| ATOM | 2963 | O   | GLU | C | 378 | 12.964 | 34.216 | 2.899  | 1.00 | 45.60 | O   |
| ATOM | 2964 | CB  | GLU | C | 378 | 14.908 | 34.961 | 0.354  | 1.00 | 46.74 | C   |
| ATOM | 2965 | CG  | GLU | C | 378 | 16.403 | 35.090 | 0.102  | 1.00 | 52.71 | C   |
| ATOM | 2966 | CD  | GLU | C | 378 | 17.261 | 35.151 | 1.363  | 1.00 | 58.43 | C   |
| ATOM | 2967 | OE1 | GLU | C | 378 | 17.153 | 36.179 | 2.093  | 1.00 | 45.50 | O   |
| ATOM | 2968 | OE2 | GLU | C | 378 | 18.024 | 34.149 | 1.626  | 1.00 | 62.09 | O1- |
| ATOM | 2969 | N   | SER | C | 379 | 12.096 | 33.587 | 0.903  | 1.00 | 47.38 | N   |
| ATOM | 2970 | CA  | SER | C | 379 | 10.684 | 33.701 | 1.256  | 1.00 | 46.95 | C   |
| ATOM | 2971 | C   | SER | C | 379 | 10.310 | 32.705 | 2.349  | 1.00 | 44.63 | C   |
| ATOM | 2972 | O   | SER | C | 379 | 9.528  | 33.061 | 3.217  | 1.00 | 47.18 | O   |
| ATOM | 2973 | CB  | SER | C | 379 | 9.782  | 33.513 | 0.057  | 1.00 | 46.50 | C   |
| ATOM | 2974 | OG  | SER | C | 379 | 10.101 | 34.434 | -0.962 | 1.00 | 42.57 | O   |
| ATOM | 2975 | N   | LEU | C | 380 | 10.835 | 31.476 | 2.258  | 1.00 | 47.65 | N   |
| ATOM | 2976 | CA  | LEU | C | 380 | 10.650 | 30.409 | 3.278  | 1.00 | 54.62 | C   |



|      |      |     |     |   |     |        |        |       |      |       |     |
|------|------|-----|-----|---|-----|--------|--------|-------|------|-------|-----|
| ATOM | 2977 | C   | LEU | C | 380 | 11.063 | 30.917 | 4.662 | 1.00 | 55.43 | C   |
| ATOM | 2978 | O   | LEU | C | 380 | 10.258 | 30.902 | 5.574 | 1.00 | 50.31 | O   |
| ATOM | 2979 | CB  | LEU | C | 380 | 11.503 | 29.192 | 2.912 | 1.00 | 57.77 | C   |
| ATOM | 2980 | CG  | LEU | C | 380 | 10.742 | 27.930 | 2.529 | 1.00 | 66.04 | C   |
| ATOM | 2981 | CD1 | LEU | C | 380 | 11.643 | 27.002 | 1.730 | 1.00 | 76.17 | C   |
| ATOM | 2982 | CD2 | LEU | C | 380 | 10.188 | 27.222 | 3.758 | 1.00 | 61.72 | C   |
| ATOM | 2983 | N   | LYS | C | 381 | 12.321 | 31.381 | 4.749 | 1.00 | 56.76 | N   |
| ATOM | 2984 | CA  | LYS | C | 381 | 13.025 | 31.821 | 5.965 | 1.00 | 61.34 | C   |
| ATOM | 2985 | C   | LYS | C | 381 | 12.398 | 33.108 | 6.541 | 1.00 | 65.58 | C   |
| ATOM | 2986 | O   | LYS | C | 381 | 12.367 | 33.309 | 7.751 | 1.00 | 78.82 | O   |
| ATOM | 2987 | CB  | LYS | C | 381 | 14.510 | 32.089 | 5.655 | 1.00 | 67.89 | C   |
| ATOM | 2988 | CG  | LYS | C | 381 | 15.343 | 30.904 | 5.156 | 1.00 | 73.11 | C   |
| ATOM | 2989 | CD  | LYS | C | 381 | 16.875 | 31.128 | 5.091 | 1.00 | 76.66 | C   |
| ATOM | 2990 | CE  | LYS | C | 381 | 17.307 | 32.541 | 4.735 | 1.00 | 76.18 | C   |
| ATOM | 2991 | NZ  | LYS | C | 381 | 18.711 | 32.629 | 4.257 | 1.00 | 65.86 | N1+ |
| ATOM | 2992 | N   | ALA | C | 382 | 11.944 | 34.019 | 5.680 | 1.00 | 61.02 | N   |
| ATOM | 2993 | CA  | ALA | C | 382 | 11.354 | 35.260 | 6.139 | 1.00 | 59.47 | C   |
| ATOM | 2994 | C   | ALA | C | 382 | 10.035 | 34.984 | 6.873 | 1.00 | 56.27 | C   |
| ATOM | 2995 | O   | ALA | C | 382 | 9.665  | 35.755 | 7.733 | 1.00 | 53.03 | O   |
| ATOM | 2996 | CB  | ALA | C | 382 | 11.132 | 36.204 | 4.984 | 1.00 | 61.27 | C   |
| ATOM | 2997 | N   | THR | C | 383 | 9.321  | 33.922 | 6.484 | 1.00 | 52.76 | N   |
| ATOM | 2998 | CA  | THR | C | 383 | 7.969  | 33.633 | 7.002 | 1.00 | 55.07 | C   |
| ATOM | 2999 | C   | THR | C | 383 | 7.969  | 32.511 | 8.046 | 1.00 | 57.83 | C   |
| ATOM | 3000 | O   | THR | C | 383 | 7.005  | 32.414 | 8.807 | 1.00 | 54.24 | O   |
| ATOM | 3001 | CB  | THR | C | 383 | 7.001  | 33.222 | 5.889 | 1.00 | 51.93 | C   |
| ATOM | 3002 | CG2 | THR | C | 383 | 6.565  | 34.407 | 5.059 | 1.00 | 51.50 | C   |
| ATOM | 3003 | OG1 | THR | C | 383 | 7.634  | 32.225 | 5.083 | 1.00 | 53.28 | O   |
| ATOM | 3004 | N   | HIS | C | 384 | 9.019  | 31.673 | 8.032 | 1.00 | 60.23 | N   |
| ATOM | 3005 | CA  | HIS | C | 384 | 9.265  | 30.575 | 8.974 | 1.00 | 62.50 | C   |
| ATOM | 3006 | C   | HIS | C | 384 | 10.706 | 30.647 | 9.495 | 1.00 | 68.06 | C   |
| ATOM | 3007 | O   | HIS | C | 384 | 11.615 | 30.861 | 8.710 | 1.00 | 89.54 | O   |
| ATOM | 3008 | CB  | HIS | C | 384 | 8.969  | 29.249 | 8.261 | 1.00 | 58.69 | C   |
| ATOM | 3009 | CG  | HIS | C | 384 | 7.611  | 29.175 | 7.636 | 1.00 | 62.74 | C   |

|        |      |     |     |   |     |        |        |         |      |       |     |
|--------|------|-----|-----|---|-----|--------|--------|---------|------|-------|-----|
| ATOM   | 3010 | CD2 | HIS | C | 384 | 6.610  | 28.269 | 7.758   | 1.00 | 64.15 | C   |
| ATOM   | 3011 | ND1 | HIS | C | 384 | 7.152  | 30.120 | 6.741   | 1.00 | 65.42 | N   |
| ATOM   | 3012 | CE1 | HIS | C | 384 | 5.934  | 29.798 | 6.336   | 1.00 | 61.68 | C   |
| ATOM   | 3013 | NE2 | HIS | C | 384 | 5.575  | 28.672 | 6.948   | 1.00 | 61.33 | N   |
| ATOM   | 3014 | N   | PRO | C | 385 | 11.024 | 30.401 | 10.791  | 1.00 | 85.82 | N   |
| ATOM   | 3015 | CA  | PRO | C | 385 | 12.410 | 30.536 | 11.255  | 1.00 | 82.20 | C   |
| ATOM   | 3016 | C   | PRO | C | 385 | 13.367 | 29.514 | 10.612  | 1.00 | 82.91 | C   |
| ATOM   | 3017 | O   | PRO | C | 385 | 13.791 | 28.549 | 11.253  | 1.00 | 84.47 | O   |
| ATOM   | 3018 | CB  | PRO | C | 385 | 12.291 | 30.298 | 12.764  | 1.00 | 80.72 | C   |
| ATOM   | 3019 | CG  | PRO | C | 385 | 11.099 | 29.362 | 12.892  | 1.00 | 84.27 | C   |
| ATOM   | 3020 | CD  | PRO | C | 385 | 10.131 | 29.851 | 11.831  | 1.00 | 87.64 | C   |
| TER    | 3021 |     | PRO | C | 385 |        |        |         |      |       |     |
| HETATM | 3022 | P   | PLP | C | 401 | -6.445 | 26.743 | -20.550 | 1.00 | 44.65 | P   |
| HETATM | 3023 | O1P | PLP | C | 401 | -7.905 | 26.469 | -20.831 | 1.00 | 43.50 | O   |
| HETATM | 3024 | O2P | PLP | C | 401 | -5.786 | 27.675 | -21.569 | 1.00 | 45.58 | O1- |
| HETATM | 3025 | O3P | PLP | C | 401 | -6.231 | 27.066 | -19.073 | 1.00 | 44.85 | O   |
| HETATM | 3026 | O4P | PLP | C | 401 | -5.593 | 25.375 | -20.710 | 1.00 | 47.81 | O   |
| HETATM | 3027 | N1  | PLP | C | 401 | -4.286 | 20.880 | -20.185 | 1.00 | 48.60 | N   |
| HETATM | 3028 | C2  | PLP | C | 401 | -3.037 | 21.040 | -19.626 | 1.00 | 44.53 | C   |
| HETATM | 3029 | C2A | PLP | C | 401 | -2.023 | 19.927 | -19.530 | 1.00 | 46.19 | C   |
| HETATM | 3030 | C3  | PLP | C | 401 | -2.631 | 22.357 | -19.123 | 1.00 | 45.04 | C   |
| HETATM | 3031 | O3  | PLP | C | 401 | -1.397 | 22.469 | -18.610 | 1.00 | 44.71 | O   |
| HETATM | 3032 | C4  | PLP | C | 401 | -3.608 | 23.489 | -19.183 | 1.00 | 50.01 | C   |
| HETATM | 3033 | C4A | PLP | C | 401 | -3.199 | 24.848 | -18.670 | 1.00 | 53.59 | C   |
| HETATM | 3034 | C5  | PLP | C | 401 | -4.943 | 23.162 | -19.816 | 1.00 | 46.94 | C   |
| HETATM | 3035 | C5A | PLP | C | 401 | -6.033 | 24.196 | -19.981 | 1.00 | 51.34 | C   |
| HETATM | 3036 | C6  | PLP | C | 401 | -5.200 | 21.870 | -20.296 | 1.00 | 44.73 | C   |
| ATOM   | 3037 | N   | MET | D | 1   | 18.320 | 13.662 | -32.168 | 1.00 | 68.10 | N   |
| ATOM   | 3038 | CA  | MET | D | 1   | 16.925 | 14.220 | -32.047 | 1.00 | 67.24 | C   |
| ATOM   | 3039 | C   | MET | D | 1   | 16.293 | 14.411 | -33.435 | 1.00 | 71.11 | C   |
| ATOM   | 3040 | O   | MET | D | 1   | 15.089 | 14.151 | -33.608 | 1.00 | 70.32 | O   |
| ATOM   | 3041 | CB  | MET | D | 1   | 16.913 | 15.572 | -31.329 | 1.00 | 62.28 | C   |
| ATOM   | 3042 | CG  | MET | D | 1   | 16.488 | 15.501 | -29.876 | 1.00 | 62.52 | C   |

|      |      |     |     |   |   |        |        |         |      |       |     |
|------|------|-----|-----|---|---|--------|--------|---------|------|-------|-----|
| ATOM | 3043 | SD  | MET | D | 1 | 15.704 | 17.042 | -29.295 | 1.00 | 54.45 | S   |
| ATOM | 3044 | CE  | MET | D | 1 | 16.062 | 16.963 | -27.538 | 1.00 | 56.91 | C   |
| ATOM | 3045 | N   | LYS | D | 2 | 17.081 | 14.958 | -34.374 | 1.00 | 66.69 | N   |
| ATOM | 3046 | CA  | LYS | D | 2 | 16.755 | 14.994 | -35.806 | 1.00 | 71.66 | C   |
| ATOM | 3047 | C   | LYS | D | 2 | 15.263 | 15.306 | -36.050 | 1.00 | 64.56 | C   |
| ATOM | 3048 | O   | LYS | D | 2 | 14.452 | 14.416 | -36.333 | 1.00 | 63.40 | O   |
| ATOM | 3049 | CB  | LYS | D | 2 | 17.172 | 13.662 | -36.431 | 1.00 | 77.79 | C   |
| ATOM | 3050 | CG  | LYS | D | 2 | 18.664 | 13.373 | -36.344 | 1.00 | 86.58 | C   |
| ATOM | 3051 | CD  | LYS | D | 2 | 19.074 | 12.101 | -37.050 | 1.00 | 90.36 | C   |
| ATOM | 3052 | CE  | LYS | D | 2 | 20.213 | 12.316 | -38.024 | 1.00 | 90.57 | C   |
| ATOM | 3053 | NZ  | LYS | D | 2 | 20.607 | 11.045 | -38.676 | 1.00 | 94.19 | N1+ |
| ATOM | 3054 | N   | PHE | D | 3 | 14.918 | 16.598 | -35.994 | 1.00 | 55.33 | N   |
| ATOM | 3055 | CA  | PHE | D | 3 | 13.601 | 17.099 | -36.395 | 1.00 | 52.68 | C   |
| ATOM | 3056 | C   | PHE | D | 3 | 13.615 | 17.495 | -37.891 | 1.00 | 50.32 | C   |
| ATOM | 3057 | O   | PHE | D | 3 | 14.614 | 17.969 | -38.400 | 1.00 | 40.02 | O   |
| ATOM | 3058 | CB  | PHE | D | 3 | 13.230 | 18.292 | -35.505 | 1.00 | 53.19 | C   |
| ATOM | 3059 | CG  | PHE | D | 3 | 13.143 | 18.044 | -34.017 | 1.00 | 53.00 | C   |
| ATOM | 3060 | CD1 | PHE | D | 3 | 12.084 | 17.333 | -33.466 | 1.00 | 55.99 | C   |
| ATOM | 3061 | CD2 | PHE | D | 3 | 14.098 | 18.550 | -33.148 | 1.00 | 52.70 | C   |
| ATOM | 3062 | CE1 | PHE | D | 3 | 11.994 | 17.134 | -32.090 | 1.00 | 61.71 | C   |
| ATOM | 3063 | CE2 | PHE | D | 3 | 13.995 | 18.355 | -31.775 | 1.00 | 54.73 | C   |
| ATOM | 3064 | CZ  | PHE | D | 3 | 12.943 | 17.654 | -31.240 | 1.00 | 49.79 | C   |
| ATOM | 3065 | N   | THR | D | 4 | 12.493 | 17.287 | -38.598 | 1.00 | 49.22 | N   |
| ATOM | 3066 | CA  | THR | D | 4 | 12.190 | 18.004 | -39.833 | 1.00 | 52.39 | C   |
| ATOM | 3067 | C   | THR | D | 4 | 12.631 | 19.456 | -39.676 | 1.00 | 54.94 | C   |
| ATOM | 3068 | O   | THR | D | 4 | 12.249 | 20.076 | -38.692 | 1.00 | 52.31 | O   |
| ATOM | 3069 | CB  | THR | D | 4 | 10.681 | 18.147 | -40.095 | 1.00 | 55.56 | C   |
| ATOM | 3070 | CG2 | THR | D | 4 | 10.420 | 18.582 | -41.523 | 1.00 | 60.00 | C   |
| ATOM | 3071 | OG1 | THR | D | 4 | 9.940  | 16.958 | -39.810 | 1.00 | 47.16 | O   |
| ATOM | 3072 | N   | PRO | D | 5 | 13.370 | 20.074 | -40.626 | 1.00 | 50.23 | N   |
| ATOM | 3073 | CA  | PRO | D | 5 | 13.761 | 21.476 | -40.488 | 1.00 | 51.60 | C   |
| ATOM | 3074 | C   | PRO | D | 5 | 12.542 | 22.408 | -40.495 | 1.00 | 52.07 | C   |
| ATOM | 3075 | O   | PRO | D | 5 | 11.449 | 22.012 | -40.891 | 1.00 | 53.85 | O   |

|      |      |    |     |   |    |        |        |         |      |       |   |
|------|------|----|-----|---|----|--------|--------|---------|------|-------|---|
| ATOM | 3076 | CB | PRO | D | 5  | 14.703 | 21.707 | -41.682 | 1.00 | 51.89 | C |
| ATOM | 3077 | CG | PRO | D | 5  | 14.268 | 20.691 | -42.710 | 1.00 | 49.16 | C |
| ATOM | 3078 | CD | PRO | D | 5  | 13.817 | 19.494 | -41.895 | 1.00 | 52.60 | C |
| ATOM | 3079 | N  | PRO | D | 6  | 12.673 | 23.655 | -39.991 | 1.00 | 51.59 | N |
| ATOM | 3080 | CA | PRO | D | 6  | 11.570 | 24.613 | -39.965 | 1.00 | 50.80 | C |
| ATOM | 3081 | C  | PRO | D | 6  | 11.371 | 25.400 | -41.255 | 1.00 | 51.86 | C |
| ATOM | 3082 | O  | PRO | D | 6  | 12.323 | 25.637 | -42.009 | 1.00 | 53.97 | O |
| ATOM | 3083 | CB | PRO | D | 6  | 12.046 | 25.613 | -38.905 | 1.00 | 58.49 | C |
| ATOM | 3084 | CG | PRO | D | 6  | 13.549 | 25.652 | -39.097 | 1.00 | 56.47 | C |
| ATOM | 3085 | CD | PRO | D | 6  | 13.911 | 24.211 | -39.415 | 1.00 | 56.51 | C |
| ATOM | 3086 | N  | PRO | D | 7  | 10.142 | 25.902 | -41.495 | 1.00 | 47.37 | N |
| ATOM | 3087 | CA | PRO | D | 7  | 9.801  | 26.570 | -42.756 | 1.00 | 49.68 | C |
| ATOM | 3088 | C  | PRO | D | 7  | 10.442 | 27.959 | -42.936 | 1.00 | 51.86 | C |
| ATOM | 3089 | O  | PRO | D | 7  | 10.434 | 28.784 | -42.018 | 1.00 | 53.13 | O |
| ATOM | 3090 | CB | PRO | D | 7  | 8.277  | 26.728 | -42.667 | 1.00 | 48.15 | C |
| ATOM | 3091 | CG | PRO | D | 7  | 8.029  | 26.856 | -41.166 | 1.00 | 50.29 | C |
| ATOM | 3092 | CD | PRO | D | 7  | 9.038  | 25.910 | -40.528 | 1.00 | 48.08 | C |
| ATOM | 3093 | N  | SER | D | 8  | 10.938 | 28.229 | -44.146 | 1.00 | 54.28 | N |
| ATOM | 3094 | CA | SER | D | 8  | 11.566 | 29.502 | -44.478 | 1.00 | 54.46 | C |
| ATOM | 3095 | C  | SER | D | 8  | 10.553 | 30.670 | -44.449 | 1.00 | 53.34 | C |
| ATOM | 3096 | O  | SER | D | 8  | 10.958 | 31.826 | -44.450 | 1.00 | 49.18 | O |
| ATOM | 3097 | CB | SER | D | 8  | 12.267 | 29.407 | -45.807 | 1.00 | 52.20 | C |
| ATOM | 3098 | OG | SER | D | 8  | 11.329 | 29.119 | -46.826 | 1.00 | 56.06 | O |
| ATOM | 3099 | N  | SER | D | 9  | 9.242  | 30.392 | -44.395 | 1.00 | 54.08 | N |
| ATOM | 3100 | CA | SER | D | 9  | 8.252  | 31.467 | -44.339 | 1.00 | 51.61 | C |
| ATOM | 3101 | C  | SER | D | 9  | 8.163  | 32.110 | -42.938 | 1.00 | 55.97 | C |
| ATOM | 3102 | O  | SER | D | 9  | 7.263  | 32.906 | -42.708 | 1.00 | 64.56 | O |
| ATOM | 3103 | CB | SER | D | 9  | 6.901  | 30.998 | -44.816 | 1.00 | 52.50 | C |
| ATOM | 3104 | OG | SER | D | 9  | 6.283  | 30.122 | -43.890 | 1.00 | 54.33 | O |
| ATOM | 3105 | N  | LEU | D | 10 | 9.078  | 31.777 | -42.016 | 1.00 | 54.82 | N |
| ATOM | 3106 | CA | LEU | D | 10 | 9.207  | 32.442 | -40.717 | 1.00 | 47.01 | C |
| ATOM | 3107 | C  | LEU | D | 10 | 10.559 | 33.153 | -40.618 | 1.00 | 49.46 | C |
| ATOM | 3108 | O  | LEU | D | 10 | 10.916 | 33.653 | -39.543 | 1.00 | 42.90 | O |

|      |      |     |     |   |    |        |        |         |      |       |     |
|------|------|-----|-----|---|----|--------|--------|---------|------|-------|-----|
| ATOM | 3109 | CB  | LEU | D | 10 | 9.134  | 31.400 | -39.600 | 1.00 | 44.62 | C   |
| ATOM | 3110 | CG  | LEU | D | 10 | 7.853  | 30.593 | -39.472 | 1.00 | 43.71 | C   |
| ATOM | 3111 | CD1 | LEU | D | 10 | 8.088  | 29.436 | -38.508 | 1.00 | 46.85 | C   |
| ATOM | 3112 | CD2 | LEU | D | 10 | 6.677  | 31.454 | -39.006 | 1.00 | 40.46 | C   |
| ATOM | 3113 | N   | ARG | D | 11 | 11.344 | 33.149 | -41.703 | 1.00 | 54.56 | N   |
| ATOM | 3114 | CA  | ARG | D | 11 | 12.696 | 33.750 | -41.674 | 1.00 | 57.23 | C   |
| ATOM | 3115 | C   | ARG | D | 11 | 12.572 | 35.272 | -41.517 | 1.00 | 51.38 | C   |
| ATOM | 3116 | O   | ARG | D | 11 | 13.437 | 35.905 | -40.933 | 1.00 | 51.82 | O   |
| ATOM | 3117 | CB  | ARG | D | 11 | 13.505 | 33.389 | -42.926 | 1.00 | 63.71 | C   |
| ATOM | 3118 | CG  | ARG | D | 11 | 13.921 | 31.923 | -42.987 | 1.00 | 73.90 | C   |
| ATOM | 3119 | CD  | ARG | D | 11 | 15.067 | 31.602 | -43.943 | 1.00 | 79.69 | C   |
| ATOM | 3120 | NE  | ARG | D | 11 | 15.871 | 30.459 | -43.487 | 1.00 | 87.72 | N   |
| ATOM | 3121 | CZ  | ARG | D | 11 | 15.954 | 29.261 | -44.084 | 1.00 | 89.78 | C   |
| ATOM | 3122 | NH1 | ARG | D | 11 | 15.393 | 29.041 | -45.262 | 1.00 | 75.39 | N1+ |
| ATOM | 3123 | NH2 | ARG | D | 11 | 16.613 | 28.278 | -43.494 | 1.00 | 94.18 | N   |
| ATOM | 3124 | N   | GLY | D | 12 | 11.460 | 35.837 | -42.004 | 1.00 | 46.26 | N   |
| ATOM | 3125 | CA  | GLY | D | 12 | 11.314 | 37.260 | -42.118 | 1.00 | 47.96 | C   |
| ATOM | 3126 | C   | GLY | D | 12 | 10.369 | 37.846 | -41.074 | 1.00 | 51.29 | C   |
| ATOM | 3127 | O   | GLY | D | 12 | 9.675  | 37.142 | -40.332 | 1.00 | 55.17 | O   |
| ATOM | 3128 | N   | PRO | D | 13 | 10.282 | 39.185 | -41.033 | 1.00 | 44.06 | N   |
| ATOM | 3129 | CA  | PRO | D | 13 | 9.557  | 39.874 | -39.977 | 1.00 | 43.55 | C   |
| ATOM | 3130 | C   | PRO | D | 13 | 8.040  | 39.849 | -40.180 | 1.00 | 46.22 | C   |
| ATOM | 3131 | O   | PRO | D | 13 | 7.577  | 39.499 | -41.264 | 1.00 | 47.59 | O   |
| ATOM | 3132 | CB  | PRO | D | 13 | 10.108 | 41.304 | -40.071 | 1.00 | 43.36 | C   |
| ATOM | 3133 | CG  | PRO | D | 13 | 10.481 | 41.477 | -41.523 | 1.00 | 42.51 | C   |
| ATOM | 3134 | CD  | PRO | D | 13 | 10.901 | 40.101 | -42.000 | 1.00 | 45.75 | C   |
| ATOM | 3135 | N   | LEU | D | 14 | 7.311  | 40.212 | -39.113 | 1.00 | 49.27 | N   |
| ATOM | 3136 | CA  | LEU | D | 14 | 5.864  | 40.428 | -39.128 | 1.00 | 52.16 | C   |
| ATOM | 3137 | C   | LEU | D | 14 | 5.579  | 41.911 | -39.392 | 1.00 | 50.31 | C   |
| ATOM | 3138 | O   | LEU | D | 14 | 6.121  | 42.768 | -38.721 | 1.00 | 59.13 | O   |
| ATOM | 3139 | CB  | LEU | D | 14 | 5.284  | 40.007 | -37.777 | 1.00 | 51.65 | C   |
| ATOM | 3140 | CG  | LEU | D | 14 | 3.814  | 40.358 | -37.583 | 1.00 | 48.41 | C   |
| ATOM | 3141 | CD1 | LEU | D | 14 | 2.953  | 39.256 | -38.148 | 1.00 | 49.15 | C   |

|      |      |     |     |   |    |        |        |         |      |       |     |
|------|------|-----|-----|---|----|--------|--------|---------|------|-------|-----|
| ATOM | 3142 | CD2 | LEU | D | 14 | 3.485  | 40.603 | -36.119 | 1.00 | 45.02 | C   |
| ATOM | 3143 | N   | VAL | D | 15 | 4.695  | 42.184 | -40.354 | 1.00 | 55.46 | N   |
| ATOM | 3144 | CA  | VAL | D | 15 | 4.471  | 43.524 | -40.913 | 1.00 | 51.79 | C   |
| ATOM | 3145 | C   | VAL | D | 15 | 2.972  | 43.681 | -41.219 | 1.00 | 50.55 | C   |
| ATOM | 3146 | O   | VAL | D | 15 | 2.468  | 43.088 | -42.163 | 1.00 | 47.20 | O   |
| ATOM | 3147 | CB  | VAL | D | 15 | 5.355  | 43.726 | -42.161 | 1.00 | 54.06 | C   |
| ATOM | 3148 | CG1 | VAL | D | 15 | 4.883  | 44.879 | -43.041 | 1.00 | 54.11 | C   |
| ATOM | 3149 | CG2 | VAL | D | 15 | 6.827  | 43.902 | -41.778 | 1.00 | 54.82 | C   |
| ATOM | 3150 | N   | ILE | D | 16 | 2.270  | 44.465 | -40.391 | 1.00 | 45.81 | N   |
| ATOM | 3151 | CA  | ILE | D | 16 | 0.839  | 44.670 | -40.515 | 1.00 | 44.23 | C   |
| ATOM | 3152 | C   | ILE | D | 16 | 0.564  | 46.158 | -40.724 | 1.00 | 51.18 | C   |
| ATOM | 3153 | O   | ILE | D | 16 | 0.554  | 46.933 | -39.773 | 1.00 | 61.36 | O   |
| ATOM | 3154 | CB  | ILE | D | 16 | 0.116  | 44.096 | -39.286 | 1.00 | 37.23 | C   |
| ATOM | 3155 | CG1 | ILE | D | 16 | 0.567  | 42.669 | -39.015 | 1.00 | 46.77 | C   |
| ATOM | 3156 | CG2 | ILE | D | 16 | -1.394 | 44.148 | -39.422 | 1.00 | 36.69 | C   |
| ATOM | 3157 | CD1 | ILE | D | 16 | 0.035  | 41.651 | -40.022 | 1.00 | 48.73 | C   |
| ATOM | 3158 | N   | PRO | D | 17 | 0.265  | 46.600 | -41.966 | 1.00 | 55.95 | N   |
| ATOM | 3159 | CA  | PRO | D | 17 | 0.000  | 48.019 | -42.230 | 1.00 | 53.09 | C   |
| ATOM | 3160 | C   | PRO | D | 17 | -1.190 | 48.585 | -41.426 | 1.00 | 51.89 | C   |
| ATOM | 3161 | O   | PRO | D | 17 | -2.039 | 47.790 | -40.978 | 1.00 | 51.97 | O   |
| ATOM | 3162 | CB  | PRO | D | 17 | -0.304 | 48.038 | -43.741 | 1.00 | 51.62 | C   |
| ATOM | 3163 | CG  | PRO | D | 17 | -0.729 | 46.622 | -44.071 | 1.00 | 52.40 | C   |
| ATOM | 3164 | CD  | PRO | D | 17 | 0.096  | 45.747 | -43.159 | 1.00 | 53.92 | C   |
| ATOM | 3165 | N   | ASP | D | 18 | -1.235 | 49.923 | -41.239 | 1.00 | 50.47 | N   |
| ATOM | 3166 | CA  | ASP | D | 18 | -2.467 | 50.633 | -40.764 | 1.00 | 52.98 | C   |
| ATOM | 3167 | C   | ASP | D | 18 | -3.494 | 50.532 | -41.888 | 1.00 | 50.59 | C   |
| ATOM | 3168 | O   | ASP | D | 18 | -3.108 | 50.570 | -43.091 | 1.00 | 51.03 | O   |
| ATOM | 3169 | CB  | ASP | D | 18 | -2.302 | 52.128 | -40.410 | 1.00 | 52.07 | C   |
| ATOM | 3170 | CG  | ASP | D | 18 | -1.329 | 52.443 | -39.276 | 1.00 | 60.37 | C   |
| ATOM | 3171 | OD1 | ASP | D | 18 | -1.620 | 52.091 | -38.107 | 1.00 | 68.28 | O   |
| ATOM | 3172 | OD2 | ASP | D | 18 | -0.277 | 53.056 | -39.557 | 1.00 | 62.50 | O1- |
| ATOM | 3173 | N   | LYS | D | 19 | -4.771 | 50.404 | -41.491 | 1.00 | 47.68 | N   |
| ATOM | 3174 | CA  | LYS | D | 19 | -5.891 | 50.356 | -42.413 | 1.00 | 42.87 | C   |

|      |      |     |     |   |    |         |        |         |      |       |     |
|------|------|-----|-----|---|----|---------|--------|---------|------|-------|-----|
| ATOM | 3175 | C   | LYS | D | 19 | -7.066  | 51.110 | -41.811 | 1.00 | 44.76 | C   |
| ATOM | 3176 | O   | LYS | D | 19 | -7.250  | 51.128 | -40.599 | 1.00 | 45.08 | O   |
| ATOM | 3177 | CB  | LYS | D | 19 | -6.356  | 48.922 | -42.692 | 1.00 | 44.83 | C   |
| ATOM | 3178 | CG  | LYS | D | 19 | -5.361  | 48.018 | -43.412 | 1.00 | 42.73 | C   |
| ATOM | 3179 | CD  | LYS | D | 19 | -5.961  | 46.677 | -43.795 | 1.00 | 42.40 | C   |
| ATOM | 3180 | CE  | LYS | D | 19 | -4.937  | 45.729 | -44.377 | 1.00 | 41.19 | C   |
| ATOM | 3181 | NZ  | LYS | D | 19 | -4.308  | 46.273 | -45.602 | 1.00 | 40.98 | N1+ |
| ATOM | 3182 | N   | ILE | D | 20 | -7.889  | 51.690 | -42.690 | 1.00 | 47.40 | N   |
| ATOM | 3183 | CA  | ILE | D | 20 | -9.079  | 52.365 | -42.269 | 1.00 | 45.21 | C   |
| ATOM | 3184 | C   | ILE | D | 20 | -10.224 | 51.358 | -42.334 | 1.00 | 44.11 | C   |
| ATOM | 3185 | O   | ILE | D | 20 | -10.752 | 51.078 | -43.390 | 1.00 | 48.91 | O   |
| ATOM | 3186 | CB  | ILE | D | 20 | -9.319  | 53.651 | -43.076 | 1.00 | 45.14 | C   |
| ATOM | 3187 | CG1 | ILE | D | 20 | -8.047  | 54.512 | -43.074 | 1.00 | 50.24 | C   |
| ATOM | 3188 | CG2 | ILE | D | 20 | -10.530 | 54.397 | -42.522 | 1.00 | 46.79 | C   |
| ATOM | 3189 | CD1 | ILE | D | 20 | -8.189  | 55.904 | -43.639 | 1.00 | 52.38 | C   |
| ATOM | 3190 | N   | MET | D | 21 | -10.613 | 50.868 | -41.150 | 1.00 | 46.33 | N   |
| ATOM | 3191 | CA  | MET | D | 21 | -11.431 | 49.674 | -40.992 | 1.00 | 44.40 | C   |
| ATOM | 3192 | C   | MET | D | 21 | -12.903 | 50.043 | -40.860 | 1.00 | 37.93 | C   |
| ATOM | 3193 | O   | MET | D | 21 | -13.488 | 49.890 | -39.817 | 1.00 | 41.42 | O   |
| ATOM | 3194 | CB  | MET | D | 21 | -10.971 | 48.863 | -39.773 | 1.00 | 38.81 | C   |
| ATOM | 3195 | CG  | MET | D | 21 | -9.567  | 48.287 | -39.965 | 1.00 | 38.17 | C   |
| ATOM | 3196 | SD  | MET | D | 21 | -9.425  | 47.029 | -41.279 | 1.00 | 41.28 | S   |
| ATOM | 3197 | CE  | MET | D | 21 | -10.442 | 45.730 | -40.579 | 1.00 | 36.62 | C   |
| ATOM | 3198 | N   | MET | D | 22 | -13.506 | 50.436 | -41.978 | 1.00 | 43.66 | N   |
| ATOM | 3199 | CA  | MET | D | 22 | -14.942 | 50.824 | -41.994 | 1.00 | 47.78 | C   |
| ATOM | 3200 | C   | MET | D | 22 | -15.771 | 49.779 | -42.766 | 1.00 | 44.28 | C   |
| ATOM | 3201 | O   | MET | D | 22 | -16.720 | 50.092 | -43.466 | 1.00 | 45.85 | O   |
| ATOM | 3202 | CB  | MET | D | 22 | -15.114 | 52.230 | -42.590 | 1.00 | 48.48 | C   |
| ATOM | 3203 | CG  | MET | D | 22 | -14.357 | 53.301 | -41.820 | 1.00 | 49.18 | C   |
| ATOM | 3204 | SD  | MET | D | 22 | -14.510 | 54.994 | -42.488 | 1.00 | 50.32 | S   |
| ATOM | 3205 | CE  | MET | D | 22 | -16.226 | 55.294 | -42.085 | 1.00 | 44.76 | C   |
| ATOM | 3206 | N   | GLY | D | 23 | -15.388 | 48.510 | -42.631 | 1.00 | 45.89 | N   |
| ATOM | 3207 | CA  | GLY | D | 23 | -16.277 | 47.411 | -42.855 | 1.00 | 47.12 | C   |

|      |      |     |     |   |    |         |        |         |      |       |   |
|------|------|-----|-----|---|----|---------|--------|---------|------|-------|---|
| ATOM | 3208 | C   | GLY | D | 23 | -17.223 | 47.276 | -41.671 | 1.00 | 43.91 | C |
| ATOM | 3209 | O   | GLY | D | 23 | -17.208 | 48.094 | -40.765 | 1.00 | 50.66 | O |
| ATOM | 3210 | N   | PRO | D | 24 | -18.087 | 46.253 | -41.603 | 1.00 | 43.30 | N |
| ATOM | 3211 | CA  | PRO | D | 24 | -18.916 | 46.071 | -40.413 | 1.00 | 46.35 | C |
| ATOM | 3212 | C   | PRO | D | 24 | -18.154 | 45.195 | -39.408 | 1.00 | 46.43 | C |
| ATOM | 3213 | O   | PRO | D | 24 | -18.752 | 44.746 | -38.425 | 1.00 | 48.70 | O |
| ATOM | 3214 | CB  | PRO | D | 24 | -20.176 | 45.414 | -40.993 | 1.00 | 42.66 | C |
| ATOM | 3215 | CG  | PRO | D | 24 | -19.672 | 44.635 | -42.221 | 1.00 | 44.02 | C |
| ATOM | 3216 | CD  | PRO | D | 24 | -18.342 | 45.243 | -42.639 | 1.00 | 41.96 | C |
| ATOM | 3217 | N   | GLY | D | 25 | -16.837 | 45.060 | -39.652 | 1.00 | 49.37 | N |
| ATOM | 3218 | CA  | GLY | D | 25 | -16.001 | 43.835 | -39.421 | 1.00 | 47.21 | C |
| ATOM | 3219 | C   | GLY | D | 25 | -15.295 | 43.997 | -38.097 | 1.00 | 50.58 | C |
| ATOM | 3220 | O   | GLY | D | 25 | -15.953 | 44.330 | -37.121 | 1.00 | 76.85 | O |
| ATOM | 3221 | N   | PRO | D | 26 | -13.965 | 43.841 | -37.993 | 1.00 | 48.37 | N |
| ATOM | 3222 | CA  | PRO | D | 26 | -13.232 | 44.458 | -36.884 | 1.00 | 46.79 | C |
| ATOM | 3223 | C   | PRO | D | 26 | -13.126 | 45.981 | -37.124 | 1.00 | 42.76 | C |
| ATOM | 3224 | O   | PRO | D | 26 | -12.890 | 46.406 | -38.239 | 1.00 | 40.99 | O |
| ATOM | 3225 | CB  | PRO | D | 26 | -11.853 | 43.781 | -36.913 | 1.00 | 45.55 | C |
| ATOM | 3226 | CG  | PRO | D | 26 | -11.990 | 42.663 | -37.935 | 1.00 | 47.78 | C |
| ATOM | 3227 | CD  | PRO | D | 26 | -13.098 | 43.083 | -38.885 | 1.00 | 47.88 | C |
| ATOM | 3228 | N   | SER | D | 27 | -13.302 | 46.792 | -36.081 | 1.00 | 44.04 | N |
| ATOM | 3229 | CA  | SER | D | 27 | -13.131 | 48.260 | -36.175 | 1.00 | 41.42 | C |
| ATOM | 3230 | C   | SER | D | 27 | -11.688 | 48.615 | -35.850 | 1.00 | 41.02 | C |
| ATOM | 3231 | O   | SER | D | 27 | -10.943 | 47.756 | -35.367 | 1.00 | 43.61 | O |
| ATOM | 3232 | CB  | SER | D | 27 | -14.084 | 48.996 | -35.263 | 1.00 | 44.65 | C |
| ATOM | 3233 | OG  | SER | D | 27 | -14.380 | 48.232 | -34.097 | 1.00 | 42.86 | O |
| ATOM | 3234 | N   | ASN | D | 28 | -11.295 | 49.861 | -36.166 | 1.00 | 44.05 | N |
| ATOM | 3235 | CA  | ASN | D | 28 | -10.051 | 50.441 | -35.636 | 1.00 | 41.94 | C |
| ATOM | 3236 | C   | ASN | D | 28 | -10.236 | 50.674 | -34.137 | 1.00 | 39.99 | C |
| ATOM | 3237 | O   | ASN | D | 28 | -11.324 | 51.099 | -33.695 | 1.00 | 42.72 | O |
| ATOM | 3238 | CB  | ASN | D | 28 | -9.676  | 51.794 | -36.234 | 1.00 | 42.05 | C |
| ATOM | 3239 | CG  | ASN | D | 28 | -9.419  | 51.753 | -37.717 | 1.00 | 40.73 | C |
| ATOM | 3240 | ND2 | ASN | D | 28 | -8.298  | 51.170 | -38.105 | 1.00 | 36.00 | N |



|      |      |     |     |   |    |         |        |         |      |       |     |
|------|------|-----|-----|---|----|---------|--------|---------|------|-------|-----|
| ATOM | 3241 | OD1 | ASN | D | 28 | -10.235 | 52.248 | -38.500 | 1.00 | 41.83 | O   |
| ATOM | 3242 | N   | CYS | D | 29 | -9.166  | 50.415 | -33.387 | 1.00 | 38.97 | N   |
| ATOM | 3243 | CA  | CYS | D | 29 | -9.130  | 50.536 | -31.917 | 1.00 | 43.58 | C   |
| ATOM | 3244 | C   | CYS | D | 29 | -8.360  | 51.797 | -31.524 | 1.00 | 41.69 | C   |
| ATOM | 3245 | O   | CYS | D | 29 | -7.443  | 52.184 | -32.232 | 1.00 | 42.46 | O   |
| ATOM | 3246 | CB  | CYS | D | 29 | -8.451  | 49.306 | -31.324 | 1.00 | 43.28 | C   |
| ATOM | 3247 | SG  | CYS | D | 29 | -9.301  | 47.770 | -31.774 | 1.00 | 40.74 | S   |
| ATOM | 3248 | N   | SER | D | 30 | -8.713  | 52.425 | -30.398 | 1.00 | 40.27 | N   |
| ATOM | 3249 | CA  | SER | D | 30 | -7.927  | 53.583 | -29.914 | 1.00 | 39.82 | C   |
| ATOM | 3250 | C   | SER | D | 30 | -6.517  | 53.133 | -29.527 | 1.00 | 40.29 | C   |
| ATOM | 3251 | O   | SER | D | 30 | -6.324  | 51.956 | -29.210 | 1.00 | 44.32 | O   |
| ATOM | 3252 | CB  | SER | D | 30 | -8.590  | 54.264 | -28.757 | 1.00 | 42.35 | C   |
| ATOM | 3253 | OG  | SER | D | 30 | -8.311  | 53.595 | -27.528 | 1.00 | 40.71 | O   |
| ATOM | 3254 | N   | LYS | D | 31 | -5.567  | 54.081 | -29.535 | 1.00 | 39.44 | N   |
| ATOM | 3255 | CA  | LYS | D | 31 | -4.209  | 53.936 | -28.956 | 1.00 | 38.64 | C   |
| ATOM | 3256 | C   | LYS | D | 31 | -4.267  | 53.402 | -27.508 | 1.00 | 37.11 | C   |
| ATOM | 3257 | O   | LYS | D | 31 | -3.577  | 52.449 | -27.174 | 1.00 | 33.24 | O   |
| ATOM | 3258 | CB  | LYS | D | 31 | -3.517  | 55.298 | -28.990 | 1.00 | 41.44 | C   |
| ATOM | 3259 | CG  | LYS | D | 31 | -2.003  | 55.311 | -28.774 | 1.00 | 43.64 | C   |
| ATOM | 3260 | CD  | LYS | D | 31 | -1.571  | 56.546 | -27.992 | 1.00 | 47.24 | C   |
| ATOM | 3261 | CE  | LYS | D | 31 | -0.136  | 56.965 | -28.162 | 1.00 | 49.47 | C   |
| ATOM | 3262 | NZ  | LYS | D | 31 | 0.804   | 56.026 | -27.509 | 1.00 | 50.94 | N1+ |
| ATOM | 3263 | N   | ARG | D | 32 | -5.086  | 54.038 | -26.657 | 1.00 | 34.11 | N   |
| ATOM | 3264 | CA  | ARG | D | 32 | -5.293  | 53.639 | -25.271 | 1.00 | 36.37 | C   |
| ATOM | 3265 | C   | ARG | D | 32 | -5.631  | 52.138 | -25.190 | 1.00 | 41.66 | C   |
| ATOM | 3266 | O   | ARG | D | 32 | -5.118  | 51.397 | -24.333 | 1.00 | 46.15 | O   |
| ATOM | 3267 | CB  | ARG | D | 32 | -6.431  | 54.471 | -24.657 | 1.00 | 36.92 | C   |
| ATOM | 3268 | CG  | ARG | D | 32 | -6.917  | 54.002 | -23.291 | 1.00 | 36.65 | C   |
| ATOM | 3269 | CD  | ARG | D | 32 | -7.771  | 55.026 | -22.556 | 1.00 | 37.86 | C   |
| ATOM | 3270 | NE  | ARG | D | 32 | -8.009  | 54.650 | -21.158 | 1.00 | 38.37 | N   |
| ATOM | 3271 | CZ  | ARG | D | 32 | -9.031  | 55.097 | -20.415 | 1.00 | 40.96 | C   |
| ATOM | 3272 | NH1 | ARG | D | 32 | -9.854  | 56.020 | -20.892 | 1.00 | 36.73 | N1+ |
| ATOM | 3273 | NH2 | ARG | D | 32 | -9.255  | 54.592 | -19.211 | 1.00 | 37.64 | N   |

|      |      |     |     |   |    |        |        |         |      |       |   |
|------|------|-----|-----|---|----|--------|--------|---------|------|-------|---|
| ATOM | 3274 | N   | VAL | D | 33 | -6.543 | 51.707 | -26.063 | 1.00 | 41.92 | N |
| ATOM | 3275 | CA  | VAL | D | 33 | -7.093 | 50.371 | -26.045 | 1.00 | 43.71 | C |
| ATOM | 3276 | C   | VAL | D | 33 | -6.041 | 49.347 | -26.498 | 1.00 | 42.74 | C |
| ATOM | 3277 | O   | VAL | D | 33 | -6.043 | 48.247 | -25.969 | 1.00 | 42.77 | O |
| ATOM | 3278 | CB  | VAL | D | 33 | -8.359 | 50.287 | -26.910 | 1.00 | 41.54 | C |
| ATOM | 3279 | CG1 | VAL | D | 33 | -8.747 | 48.854 | -27.208 | 1.00 | 43.50 | C |
| ATOM | 3280 | CG2 | VAL | D | 33 | -9.502 | 51.002 | -26.241 | 1.00 | 44.53 | C |
| ATOM | 3281 | N   | LEU | D | 34 | -5.212 | 49.684 | -27.501 | 1.00 | 38.67 | N |
| ATOM | 3282 | CA  | LEU | D | 34 | -4.225 | 48.744 | -28.024 | 1.00 | 39.52 | C |
| ATOM | 3283 | C   | LEU | D | 34 | -3.074 | 48.663 | -27.021 | 1.00 | 45.25 | C |
| ATOM | 3284 | O   | LEU | D | 34 | -2.404 | 47.633 | -26.901 | 1.00 | 51.95 | O |
| ATOM | 3285 | CB  | LEU | D | 34 | -3.691 | 49.183 | -29.393 | 1.00 | 39.57 | C |
| ATOM | 3286 | CG  | LEU | D | 34 | -4.628 | 49.057 | -30.597 | 1.00 | 43.44 | C |
| ATOM | 3287 | CD1 | LEU | D | 34 | -3.924 | 49.511 | -31.862 | 1.00 | 43.09 | C |
| ATOM | 3288 | CD2 | LEU | D | 34 | -5.151 | 47.636 | -30.771 | 1.00 | 44.45 | C |
| ATOM | 3289 | N   | ALA | D | 35 | -2.828 | 49.787 | -26.334 | 1.00 | 46.03 | N |
| ATOM | 3290 | CA  | ALA | D | 35 | -1.734 | 49.887 | -25.391 | 1.00 | 42.55 | C |
| ATOM | 3291 | C   | ALA | D | 35 | -1.951 | 48.854 | -24.267 | 1.00 | 40.14 | C |
| ATOM | 3292 | O   | ALA | D | 35 | -1.015 | 48.247 | -23.751 | 1.00 | 42.38 | O |
| ATOM | 3293 | CB  | ALA | D | 35 | -1.630 | 51.308 | -24.885 | 1.00 | 39.59 | C |
| ATOM | 3294 | N   | ALA | D | 36 | -3.221 | 48.624 | -23.954 | 1.00 | 37.66 | N |
| ATOM | 3295 | CA  | ALA | D | 36 | -3.651 | 47.778 | -22.897 | 1.00 | 37.56 | C |
| ATOM | 3296 | C   | ALA | D | 36 | -3.221 | 46.327 | -23.128 | 1.00 | 37.94 | C |
| ATOM | 3297 | O   | ALA | D | 36 | -3.121 | 45.581 | -22.161 | 1.00 | 43.44 | O |
| ATOM | 3298 | CB  | ALA | D | 36 | -5.154 | 47.893 | -22.773 | 1.00 | 37.65 | C |
| ATOM | 3299 | N   | LEU | D | 37 | -3.009 | 45.917 | -24.384 | 1.00 | 37.93 | N |
| ATOM | 3300 | CA  | LEU | D | 37 | -2.662 | 44.528 | -24.673 | 1.00 | 39.37 | C |
| ATOM | 3301 | C   | LEU | D | 37 | -1.250 | 44.221 | -24.160 | 1.00 | 41.52 | C |
| ATOM | 3302 | O   | LEU | D | 37 | -0.882 | 43.030 | -23.840 | 1.00 | 36.50 | O |
| ATOM | 3303 | CB  | LEU | D | 37 | -2.765 | 44.294 | -26.180 | 1.00 | 39.07 | C |
| ATOM | 3304 | CG  | LEU | D | 37 | -4.191 | 44.346 | -26.721 | 1.00 | 43.21 | C |
| ATOM | 3305 | CD1 | LEU | D | 37 | -4.183 | 44.477 | -28.239 | 1.00 | 41.91 | C |
| ATOM | 3306 | CD2 | LEU | D | 37 | -4.995 | 43.121 | -26.259 | 1.00 | 38.51 | C |

|      |      |     |     |   |    |        |        |         |      |       |   |
|------|------|-----|-----|---|----|--------|--------|---------|------|-------|---|
| ATOM | 3307 | N   | ASN | D | 38 | -0.460 | 45.294 | -24.067 | 1.00 | 41.18 | N |
| ATOM | 3308 | CA  | ASN | D | 38 | 0.942  | 45.202 | -23.731 | 1.00 | 43.47 | C |
| ATOM | 3309 | C   | ASN | D | 38 | 1.096  | 45.198 | -22.205 | 1.00 | 42.38 | C |
| ATOM | 3310 | O   | ASN | D | 38 | 1.608  | 46.149 | -21.626 | 1.00 | 38.98 | O |
| ATOM | 3311 | CB  | ASN | D | 38 | 1.714  | 46.331 | -24.399 | 1.00 | 42.69 | C |
| ATOM | 3312 | CG  | ASN | D | 38 | 3.200  | 46.145 | -24.288 | 1.00 | 41.24 | C |
| ATOM | 3313 | ND2 | ASN | D | 38 | 3.906  | 47.172 | -23.859 | 1.00 | 41.70 | N |
| ATOM | 3314 | OD1 | ASN | D | 38 | 3.698  | 45.077 | -24.576 | 1.00 | 46.89 | O |
| ATOM | 3315 | N   | ASN | D | 39 | 0.668  | 44.098 | -21.567 | 1.00 | 39.21 | N |
| ATOM | 3316 | CA  | ASN | D | 39 | 0.805  | 43.942 | -20.136 | 1.00 | 39.25 | C |
| ATOM | 3317 | C   | ASN | D | 39 | 0.964  | 42.462 | -19.832 | 1.00 | 42.76 | C |
| ATOM | 3318 | O   | ASN | D | 39 | 0.533  | 41.614 | -20.640 | 1.00 | 49.64 | O |
| ATOM | 3319 | CB  | ASN | D | 39 | -0.351 | 44.548 | -19.337 | 1.00 | 41.28 | C |
| ATOM | 3320 | CG  | ASN | D | 39 | -0.318 | 46.065 | -19.302 | 1.00 | 39.56 | C |
| ATOM | 3321 | ND2 | ASN | D | 39 | -1.360 | 46.692 | -19.823 | 1.00 | 34.86 | N |
| ATOM | 3322 | OD1 | ASN | D | 39 | 0.651  | 46.662 | -18.834 | 1.00 | 37.32 | O |
| ATOM | 3323 | N   | THR | D | 40 | 1.602  | 42.189 | -18.682 | 1.00 | 40.75 | N |
| ATOM | 3324 | CA  | THR | D | 40 | 1.708  | 40.850 | -18.134 | 1.00 | 43.15 | C |
| ATOM | 3325 | C   | THR | D | 40 | 0.389  | 40.081 | -18.294 | 1.00 | 38.98 | C |
| ATOM | 3326 | O   | THR | D | 40 | -0.657 | 40.490 | -17.746 | 1.00 | 33.41 | O |
| ATOM | 3327 | CB  | THR | D | 40 | 2.071  | 40.872 | -16.645 | 1.00 | 44.57 | C |
| ATOM | 3328 | CG2 | THR | D | 40 | 2.423  | 39.503 | -16.112 | 1.00 | 44.75 | C |
| ATOM | 3329 | OG1 | THR | D | 40 | 3.183  | 41.745 | -16.474 | 1.00 | 51.69 | O |
| ATOM | 3330 | N   | CYS | D | 41 | 0.463  | 38.966 | -19.029 | 1.00 | 36.97 | N |
| ATOM | 3331 | CA  | CYS | D | 41 | -0.567 | 37.954 | -19.001 | 1.00 | 37.44 | C |
| ATOM | 3332 | C   | CYS | D | 41 | -0.618 | 37.379 | -17.583 | 1.00 | 37.00 | C |
| ATOM | 3333 | O   | CYS | D | 41 | 0.257  | 36.602 | -17.204 | 1.00 | 33.49 | O |
| ATOM | 3334 | CB  | CYS | D | 41 | -0.303 | 36.805 | -19.967 | 1.00 | 37.67 | C |
| ATOM | 3335 | SG  | CYS | D | 41 | 0.204  | 37.321 | -21.617 | 1.00 | 37.32 | S |
| ATOM | 3336 | N   | LEU | D | 42 | -1.632 | 37.789 | -16.819 | 1.00 | 35.02 | N |
| ATOM | 3337 | CA  | LEU | D | 42 | -1.674 | 37.522 | -15.407 | 1.00 | 38.16 | C |
| ATOM | 3338 | C   | LEU | D | 42 | -2.189 | 36.099 | -15.184 | 1.00 | 43.70 | C |
| ATOM | 3339 | O   | LEU | D | 42 | -2.800 | 35.496 | -16.080 | 1.00 | 45.36 | O |

|      |      |     |     |   |    |        |        |         |      |       |   |
|------|------|-----|-----|---|----|--------|--------|---------|------|-------|---|
| ATOM | 3340 | CB  | LEU | D | 42 | -2.572 | 38.551 | -14.718 | 1.00 | 35.62 | C |
| ATOM | 3341 | CG  | LEU | D | 42 | -2.005 | 39.963 | -14.684 | 1.00 | 35.30 | C |
| ATOM | 3342 | CD1 | LEU | D | 42 | -3.007 | 40.944 | -14.115 | 1.00 | 35.53 | C |
| ATOM | 3343 | CD2 | LEU | D | 42 | -0.723 | 40.002 | -13.881 | 1.00 | 37.35 | C |
| ATOM | 3344 | N   | SER | D | 43 | -1.886 | 35.574 | -13.991 | 1.00 | 42.83 | N |
| ATOM | 3345 | CA  | SER | D | 43 | -2.463 | 34.348 | -13.502 | 1.00 | 41.51 | C |
| ATOM | 3346 | C   | SER | D | 43 | -3.965 | 34.557 | -13.293 | 1.00 | 42.11 | C |
| ATOM | 3347 | O   | SER | D | 43 | -4.401 | 35.682 | -13.087 | 1.00 | 40.41 | O |
| ATOM | 3348 | CB  | SER | D | 43 | -1.813 | 33.888 | -12.236 | 1.00 | 41.79 | C |
| ATOM | 3349 | OG  | SER | D | 43 | -2.659 | 32.978 | -11.562 | 1.00 | 44.62 | O |
| ATOM | 3350 | N   | ASN | D | 44 | -4.713 | 33.446 | -13.318 | 1.00 | 38.98 | N |
| ATOM | 3351 | CA  | ASN | D | 44 | -6.142 | 33.454 | -13.193 | 1.00 | 40.56 | C |
| ATOM | 3352 | C   | ASN | D | 44 | -6.525 | 33.912 | -11.771 | 1.00 | 41.05 | C |
| ATOM | 3353 | O   | ASN | D | 44 | -7.645 | 34.428 | -11.567 | 1.00 | 41.58 | O |
| ATOM | 3354 | CB  | ASN | D | 44 | -6.743 | 32.100 | -13.620 | 1.00 | 42.58 | C |
| ATOM | 3355 | CG  | ASN | D | 44 | -6.551 | 31.775 | -15.100 | 1.00 | 47.88 | C |
| ATOM | 3356 | ND2 | ASN | D | 44 | -6.070 | 30.579 | -15.405 | 1.00 | 36.08 | N |
| ATOM | 3357 | OD1 | ASN | D | 44 | -6.849 | 32.588 | -15.980 | 1.00 | 49.84 | O |
| ATOM | 3358 | N   | PHE | D | 45 | -5.610 | 33.792 | -10.794 | 1.00 | 42.77 | N |
| ATOM | 3359 | CA  | PHE | D | 45 | -5.977 | 34.022 | -9.385  | 1.00 | 45.35 | C |
| ATOM | 3360 | C   | PHE | D | 45 | -5.303 | 35.255 | -8.784  | 1.00 | 47.26 | C |
| ATOM | 3361 | O   | PHE | D | 45 | -5.529 | 35.525 | -7.612  | 1.00 | 54.17 | O |
| ATOM | 3362 | CB  | PHE | D | 45 | -5.790 | 32.738 | -8.567  | 1.00 | 51.59 | C |
| ATOM | 3363 | CG  | PHE | D | 45 | -7.030 | 31.893 | -8.684  | 1.00 | 51.86 | C |
| ATOM | 3364 | CD1 | PHE | D | 45 | -8.125 | 32.142 | -7.867  | 1.00 | 54.09 | C |
| ATOM | 3365 | CD2 | PHE | D | 45 | -7.175 | 30.992 | -9.729  | 1.00 | 52.42 | C |
| ATOM | 3366 | CE1 | PHE | D | 45 | -9.304 | 31.431 | -8.030  | 1.00 | 57.59 | C |
| ATOM | 3367 | CE2 | PHE | D | 45 | -8.358 | 30.287 | -9.894  | 1.00 | 52.51 | C |
| ATOM | 3368 | CZ  | PHE | D | 45 | -9.415 | 30.498 | -9.041  | 1.00 | 55.64 | C |
| ATOM | 3369 | N   | HIS | D | 46 | -4.604 | 36.052 | -9.605  | 1.00 | 44.10 | N |
| ATOM | 3370 | CA  | HIS | D | 46 | -3.986 | 37.288 | -9.155  | 1.00 | 40.35 | C |
| ATOM | 3371 | C   | HIS | D | 46 | -5.050 | 38.354 | -8.889  | 1.00 | 39.56 | C |
| ATOM | 3372 | O   | HIS | D | 46 | -5.984 | 38.466 | -9.643  | 1.00 | 40.07 | O |

|      |      |     |     |   |    |        |        |         |      |       |     |
|------|------|-----|-----|---|----|--------|--------|---------|------|-------|-----|
| ATOM | 3373 | CB  | HIS | D | 46 | -3.006 | 37.813 | -10.216 | 1.00 | 44.49 | C   |
| ATOM | 3374 | CG  | HIS | D | 46 | -1.668 | 37.153 | -10.240 | 1.00 | 43.96 | C   |
| ATOM | 3375 | CD2 | HIS | D | 46 | -1.029 | 36.377 | -9.331  | 1.00 | 39.60 | C   |
| ATOM | 3376 | ND1 | HIS | D | 46 | -0.810 | 37.296 | -11.319 | 1.00 | 46.07 | N   |
| ATOM | 3377 | CE1 | HIS | D | 46 | 0.303  | 36.619 | -11.060 | 1.00 | 49.53 | C   |
| ATOM | 3378 | NE2 | HIS | D | 46 | 0.186  | 36.039 | -9.852  | 1.00 | 39.46 | N   |
| ATOM | 3379 | N   | ASP | D | 47 | -4.814 | 39.212 | -7.893  | 1.00 | 40.35 | N   |
| ATOM | 3380 | CA  | ASP | D | 47 | -5.773 | 40.240 | -7.479  | 1.00 | 45.72 | C   |
| ATOM | 3381 | C   | ASP | D | 47 | -5.972 | 41.313 | -8.563  | 1.00 | 46.88 | C   |
| ATOM | 3382 | O   | ASP | D | 47 | -7.079 | 41.867 | -8.725  | 1.00 | 46.38 | O   |
| ATOM | 3383 | CB  | ASP | D | 47 | -5.347 | 40.900 | -6.167  | 1.00 | 47.43 | C   |
| ATOM | 3384 | CG  | ASP | D | 47 | -5.374 | 39.940 | -4.994  | 1.00 | 53.46 | C   |
| ATOM | 3385 | OD1 | ASP | D | 47 | -6.382 | 39.185 | -4.871  | 1.00 | 57.56 | O   |
| ATOM | 3386 | OD2 | ASP | D | 47 | -4.373 | 39.920 | -4.239  | 1.00 | 53.47 | O1- |
| ATOM | 3387 | N   | GLU | D | 48 | -4.910 | 41.662 | -9.286  | 1.00 | 45.37 | N   |
| ATOM | 3388 | CA  | GLU | D | 48 | -5.046 | 42.699 | -10.317 | 1.00 | 39.94 | C   |
| ATOM | 3389 | C   | GLU | D | 48 | -6.033 | 42.219 | -11.398 | 1.00 | 39.00 | C   |
| ATOM | 3390 | O   | GLU | D | 48 | -6.759 | 43.028 | -11.965 | 1.00 | 34.98 | O   |
| ATOM | 3391 | CB  | GLU | D | 48 | -3.685 | 43.091 | -10.888 | 1.00 | 38.80 | C   |
| ATOM | 3392 | CG  | GLU | D | 48 | -2.706 | 43.592 | -9.844  | 1.00 | 38.12 | C   |
| ATOM | 3393 | CD  | GLU | D | 48 | -1.692 | 42.563 | -9.354  | 1.00 | 42.12 | C   |
| ATOM | 3394 | OE1 | GLU | D | 48 | -2.015 | 41.337 | -9.292  | 1.00 | 39.67 | O   |
| ATOM | 3395 | OE2 | GLU | D | 48 | -0.569 | 42.986 | -9.044  | 1.00 | 39.42 | O1- |
| ATOM | 3396 | N   | LEU | D | 49 | -6.103 | 40.905 | -11.658 | 1.00 | 37.50 | N   |
| ATOM | 3397 | CA  | LEU | D | 49 | -7.004 | 40.423 | -12.705 | 1.00 | 41.82 | C   |
| ATOM | 3398 | C   | LEU | D | 49 | -8.462 | 40.462 | -12.213 | 1.00 | 42.75 | C   |
| ATOM | 3399 | O   | LEU | D | 49 | -9.363 | 40.858 | -12.970 | 1.00 | 39.90 | O   |
| ATOM | 3400 | CB  | LEU | D | 49 | -6.599 | 39.018 | -13.153 | 1.00 | 39.80 | C   |
| ATOM | 3401 | CG  | LEU | D | 49 | -7.507 | 38.413 | -14.222 | 1.00 | 40.93 | C   |
| ATOM | 3402 | CD1 | LEU | D | 49 | -7.528 | 39.261 | -15.496 | 1.00 | 41.63 | C   |
| ATOM | 3403 | CD2 | LEU | D | 49 | -7.091 | 36.988 | -14.533 | 1.00 | 41.13 | C   |
| ATOM | 3404 | N   | PHE | D | 50 | -8.679 | 40.036 | -10.959 | 1.00 | 43.44 | N   |
| ATOM | 3405 | CA  | PHE | D | 50 | -9.984 | 40.072 | -10.309 | 1.00 | 46.59 | C   |

|      |      |     |     |   |    |         |        |         |      |       |   |
|------|------|-----|-----|---|----|---------|--------|---------|------|-------|---|
| ATOM | 3406 | C   | PHE | D | 50 | -10.508 | 41.507 | -10.261 | 1.00 | 41.00 | C |
| ATOM | 3407 | O   | PHE | D | 50 | -11.669 | 41.753 | -10.411 | 1.00 | 38.88 | O |
| ATOM | 3408 | CB  | PHE | D | 50 | -9.936  | 39.480 | -8.897  | 1.00 | 50.97 | C |
| ATOM | 3409 | CG  | PHE | D | 50 | -9.778  | 37.980 | -8.824  | 1.00 | 58.85 | C |
| ATOM | 3410 | CD1 | PHE | D | 50 | -10.360 | 37.147 | -9.767  | 1.00 | 63.65 | C |
| ATOM | 3411 | CD2 | PHE | D | 50 | -9.051  | 37.399 | -7.791  | 1.00 | 64.77 | C |
| ATOM | 3412 | CE1 | PHE | D | 50 | -10.200 | 35.770 | -9.682  | 1.00 | 74.20 | C |
| ATOM | 3413 | CE2 | PHE | D | 50 | -8.892  | 36.024 | -7.709  | 1.00 | 61.26 | C |
| ATOM | 3414 | CZ  | PHE | D | 50 | -9.476  | 35.213 | -8.650  | 1.00 | 67.31 | C |
| ATOM | 3415 | N   | GLN | D | 51 | -9.615  | 42.457 | -10.028 | 1.00 | 45.12 | N |
| ATOM | 3416 | CA  | GLN | D | 51 | -9.994  | 43.846 | -10.002 | 1.00 | 45.01 | C |
| ATOM | 3417 | C   | GLN | D | 51 | -10.531 | 44.258 | -11.382 | 1.00 | 47.24 | C |
| ATOM | 3418 | O   | GLN | D | 51 | -11.599 | 44.890 | -11.477 | 1.00 | 45.08 | O |
| ATOM | 3419 | CB  | GLN | D | 51 | -8.777  | 44.658 | -9.593  | 1.00 | 45.86 | C |
| ATOM | 3420 | CG  | GLN | D | 51 | -8.915  | 46.136 | -9.891  | 1.00 | 55.32 | C |
| ATOM | 3421 | CD  | GLN | D | 51 | -9.371  | 46.885 | -8.670  | 1.00 | 57.38 | C |
| ATOM | 3422 | NE2 | GLN | D | 51 | -10.442 | 46.396 | -8.059  | 1.00 | 52.00 | N |
| ATOM | 3423 | OE1 | GLN | D | 51 | -8.744  | 47.870 | -8.279  | 1.00 | 62.55 | O |
| ATOM | 3424 | N   | VAL | D | 52 | -9.787  | 43.917 | -12.449 | 1.00 | 45.61 | N |
| ATOM | 3425 | CA  | VAL | D | 52 | -10.169 | 44.305 | -13.809 | 1.00 | 45.35 | C |
| ATOM | 3426 | C   | VAL | D | 52 | -11.500 | 43.622 | -14.180 | 1.00 | 42.59 | C |
| ATOM | 3427 | O   | VAL | D | 52 | -12.385 | 44.250 | -14.776 | 1.00 | 41.00 | O |
| ATOM | 3428 | CB  | VAL | D | 52 | -9.062  | 44.014 | -14.838 | 1.00 | 47.24 | C |
| ATOM | 3429 | CG1 | VAL | D | 52 | -9.526  | 44.317 | -16.250 | 1.00 | 49.75 | C |
| ATOM | 3430 | CG2 | VAL | D | 52 | -7.780  | 44.778 | -14.549 | 1.00 | 49.30 | C |
| ATOM | 3431 | N   | ILE | D | 53 | -11.672 | 42.364 | -13.775 | 1.00 | 36.89 | N |
| ATOM | 3432 | CA  | ILE | D | 53 | -12.909 | 41.642 | -14.045 | 1.00 | 37.32 | C |
| ATOM | 3433 | C   | ILE | D | 53 | -14.123 | 42.312 | -13.369 | 1.00 | 39.38 | C |
| ATOM | 3434 | O   | ILE | D | 53 | -15.183 | 42.431 | -13.981 | 1.00 | 40.58 | O |
| ATOM | 3435 | CB  | ILE | D | 53 | -12.764 | 40.189 | -13.594 | 1.00 | 37.40 | C |
| ATOM | 3436 | CG1 | ILE | D | 53 | -11.910 | 39.390 | -14.585 | 1.00 | 37.12 | C |
| ATOM | 3437 | CG2 | ILE | D | 53 | -14.144 | 39.602 | -13.376 | 1.00 | 37.08 | C |
| ATOM | 3438 | CD1 | ILE | D | 53 | -11.285 | 38.141 | -14.004 | 1.00 | 37.28 | C |

|      |      |     |     |   |    |         |        |         |      |       |     |
|------|------|-----|-----|---|----|---------|--------|---------|------|-------|-----|
| ATOM | 3439 | N   | ASP | D | 54 | -13.985 | 42.742 | -12.108 | 1.00 | 41.37 | N   |
| ATOM | 3440 | CA  | ASP | D | 54 | -15.087 | 43.391 | -11.391 | 1.00 | 42.22 | C   |
| ATOM | 3441 | C   | ASP | D | 54 | -15.484 | 44.668 | -12.146 | 1.00 | 43.55 | C   |
| ATOM | 3442 | O   | ASP | D | 54 | -16.676 | 44.996 | -12.219 | 1.00 | 50.16 | O   |
| ATOM | 3443 | CB  | ASP | D | 54 | -14.747 | 43.687 | -9.925  | 1.00 | 43.70 | C   |
| ATOM | 3444 | CG  | ASP | D | 54 | -14.827 | 42.500 | -8.975  | 1.00 | 48.57 | C   |
| ATOM | 3445 | OD1 | ASP | D | 54 | -15.018 | 41.370 | -9.460  | 1.00 | 46.60 | O   |
| ATOM | 3446 | OD2 | ASP | D | 54 | -14.665 | 42.715 | -7.743  | 1.00 | 50.20 | O1- |
| ATOM | 3447 | N   | GLU | D | 55 | -14.494 | 45.367 | -12.723 | 1.00 | 45.17 | N   |
| ATOM | 3448 | CA  | GLU | D | 55 | -14.695 | 46.668 | -13.413 | 1.00 | 46.03 | C   |
| ATOM | 3449 | C   | GLU | D | 55 | -15.361 | 46.464 | -14.780 | 1.00 | 47.80 | C   |
| ATOM | 3450 | O   | GLU | D | 55 | -16.201 | 47.281 | -15.183 | 1.00 | 45.58 | O   |
| ATOM | 3451 | CB  | GLU | D | 55 | -13.372 | 47.425 | -13.521 | 1.00 | 46.75 | C   |
| ATOM | 3452 | CG  | GLU | D | 55 | -12.849 | 47.832 | -12.145 | 1.00 | 52.57 | C   |
| ATOM | 3453 | CD  | GLU | D | 55 | -11.520 | 48.558 | -12.058 | 1.00 | 46.89 | C   |
| ATOM | 3454 | OE1 | GLU | D | 55 | -10.933 | 48.824 | -13.103 | 1.00 | 44.92 | O   |
| ATOM | 3455 | OE2 | GLU | D | 55 | -11.114 | 48.886 | -10.930 | 1.00 | 50.40 | O1- |
| ATOM | 3456 | N   | VAL | D | 56 | -14.995 | 45.374 | -15.471 | 1.00 | 47.95 | N   |
| ATOM | 3457 | CA  | VAL | D | 56 | -15.606 | 45.013 | -16.750 | 1.00 | 44.06 | C   |
| ATOM | 3458 | C   | VAL | D | 56 | -17.086 | 44.699 | -16.516 | 1.00 | 41.15 | C   |
| ATOM | 3459 | O   | VAL | D | 56 | -17.923 | 45.179 | -17.243 | 1.00 | 38.33 | O   |
| ATOM | 3460 | CB  | VAL | D | 56 | -14.878 | 43.830 | -17.416 | 1.00 | 45.61 | C   |
| ATOM | 3461 | CG1 | VAL | D | 56 | -15.753 | 43.134 | -18.455 | 1.00 | 45.84 | C   |
| ATOM | 3462 | CG2 | VAL | D | 56 | -13.554 | 44.263 | -18.031 | 1.00 | 41.14 | C   |
| ATOM | 3463 | N   | LYS | D | 57 | -17.386 | 43.898 | -15.488 | 1.00 | 41.91 | N   |
| ATOM | 3464 | CA  | LYS | D | 57 | -18.766 | 43.535 | -15.159 | 1.00 | 42.35 | C   |
| ATOM | 3465 | C   | LYS | D | 57 | -19.574 | 44.801 | -14.816 | 1.00 | 47.97 | C   |
| ATOM | 3466 | O   | LYS | D | 57 | -20.747 | 44.929 | -15.160 | 1.00 | 50.32 | O   |
| ATOM | 3467 | CB  | LYS | D | 57 | -18.795 | 42.500 | -14.032 | 1.00 | 39.46 | C   |
| ATOM | 3468 | CG  | LYS | D | 57 | -18.145 | 41.172 | -14.382 | 1.00 | 42.28 | C   |
| ATOM | 3469 | CD  | LYS | D | 57 | -18.395 | 40.047 | -13.389 | 1.00 | 47.00 | C   |
| ATOM | 3470 | CE  | LYS | D | 57 | -18.361 | 40.459 | -11.931 | 1.00 | 49.07 | C   |
| ATOM | 3471 | NZ  | LYS | D | 57 | -18.747 | 39.330 | -11.047 | 1.00 | 50.61 | N1+ |

|      |      |     |     |   |    |         |        |         |      |       |     |
|------|------|-----|-----|---|----|---------|--------|---------|------|-------|-----|
| ATOM | 3472 | N   | ASP | D | 58 | -18.953 | 45.774 | -14.146 | 1.00 | 51.33 | N   |
| ATOM | 3473 | CA  | ASP | D | 58 | -19.665 | 47.025 | -13.880 | 1.00 | 52.27 | C   |
| ATOM | 3474 | C   | ASP | D | 58 | -19.953 | 47.752 | -15.202 | 1.00 | 52.46 | C   |
| ATOM | 3475 | O   | ASP | D | 58 | -21.035 | 48.334 | -15.388 | 1.00 | 50.47 | O   |
| ATOM | 3476 | CB  | ASP | D | 58 | -18.860 | 47.936 | -12.956 | 1.00 | 54.02 | C   |
| ATOM | 3477 | CG  | ASP | D | 58 | -18.768 | 47.461 | -11.525 | 1.00 | 48.84 | C   |
| ATOM | 3478 | OD1 | ASP | D | 58 | -19.521 | 46.517 | -11.163 | 1.00 | 47.72 | O   |
| ATOM | 3479 | OD2 | ASP | D | 58 | -17.938 | 48.044 | -10.798 | 1.00 | 48.45 | O1- |
| ATOM | 3480 | N   | GLY | D | 59 | -18.946 | 47.768 | -16.086 | 1.00 | 50.58 | N   |
| ATOM | 3481 | CA  | GLY | D | 59 | -19.045 | 48.348 | -17.424 | 1.00 | 49.21 | C   |
| ATOM | 3482 | C   | GLY | D | 59 | -20.087 | 47.671 | -18.318 | 1.00 | 49.62 | C   |
| ATOM | 3483 | O   | GLY | D | 59 | -20.701 | 48.321 | -19.137 | 1.00 | 42.76 | O   |
| ATOM | 3484 | N   | LEU | D | 60 | -20.269 | 46.353 | -18.190 | 1.00 | 49.10 | N   |
| ATOM | 3485 | CA  | LEU | D | 60 | -21.238 | 45.640 | -19.010 | 1.00 | 46.23 | C   |
| ATOM | 3486 | C   | LEU | D | 60 | -22.656 | 45.890 | -18.467 | 1.00 | 45.97 | C   |
| ATOM | 3487 | O   | LEU | D | 60 | -23.581 | 46.207 | -19.229 | 1.00 | 48.15 | O   |
| ATOM | 3488 | CB  | LEU | D | 60 | -20.872 | 44.153 | -19.056 | 1.00 | 43.35 | C   |
| ATOM | 3489 | CG  | LEU | D | 60 | -19.537 | 43.838 | -19.726 | 1.00 | 41.06 | C   |
| ATOM | 3490 | CD1 | LEU | D | 60 | -19.296 | 42.338 | -19.767 | 1.00 | 45.10 | C   |
| ATOM | 3491 | CD2 | LEU | D | 60 | -19.446 | 44.426 | -21.133 | 1.00 | 39.64 | C   |
| ATOM | 3492 | N   | ARG | D | 61 | -22.826 | 45.817 | -17.146 | 1.00 | 41.77 | N   |
| ATOM | 3493 | CA  | ARG | D | 61 | -24.079 | 46.238 | -16.555 | 1.00 | 40.56 | C   |
| ATOM | 3494 | C   | ARG | D | 61 | -24.468 | 47.637 | -17.085 | 1.00 | 42.96 | C   |
| ATOM | 3495 | O   | ARG | D | 61 | -25.643 | 47.924 | -17.347 | 1.00 | 44.43 | O   |
| ATOM | 3496 | CB  | ARG | D | 61 | -23.984 | 46.159 | -15.033 | 1.00 | 41.73 | C   |
| ATOM | 3497 | CG  | ARG | D | 61 | -24.229 | 44.766 | -14.477 | 1.00 | 42.85 | C   |
| ATOM | 3498 | CD  | ARG | D | 61 | -24.445 | 44.775 | -12.978 | 1.00 | 45.08 | C   |
| ATOM | 3499 | NE  | ARG | D | 61 | -23.187 | 44.937 | -12.263 | 1.00 | 47.74 | N   |
| ATOM | 3500 | CZ  | ARG | D | 61 | -22.360 | 43.944 | -11.938 | 1.00 | 43.70 | C   |
| ATOM | 3501 | NH1 | ARG | D | 61 | -22.700 | 42.687 | -12.173 | 1.00 | 38.44 | N1+ |
| ATOM | 3502 | NH2 | ARG | D | 61 | -21.188 | 44.228 | -11.391 | 1.00 | 41.57 | N   |
| ATOM | 3503 | N   | TYR | D | 62 | -23.491 | 48.511 | -17.308 | 1.00 | 39.96 | N   |
| ATOM | 3504 | CA  | TYR | D | 62 | -23.804 | 49.860 | -17.747 | 1.00 | 40.39 | C   |



|      |      |     |     |   |    |         |        |         |      |       |   |
|------|------|-----|-----|---|----|---------|--------|---------|------|-------|---|
| ATOM | 3505 | C   | TYR | D | 62 | -24.193 | 49.898 | -19.236 | 1.00 | 44.35 | C |
| ATOM | 3506 | O   | TYR | D | 62 | -25.214 | 50.492 | -19.587 | 1.00 | 47.10 | O |
| ATOM | 3507 | CB  | TYR | D | 62 | -22.618 | 50.765 | -17.430 | 1.00 | 39.12 | C |
| ATOM | 3508 | CG  | TYR | D | 62 | -22.682 | 52.142 | -18.018 | 1.00 | 36.28 | C |
| ATOM | 3509 | CD1 | TYR | D | 62 | -23.623 | 53.055 | -17.592 | 1.00 | 39.81 | C |
| ATOM | 3510 | CD2 | TYR | D | 62 | -21.806 | 52.532 | -19.001 | 1.00 | 36.78 | C |
| ATOM | 3511 | CE1 | TYR | D | 62 | -23.700 | 54.318 | -18.148 | 1.00 | 41.14 | C |
| ATOM | 3512 | CE2 | TYR | D | 62 | -21.861 | 53.798 | -19.552 | 1.00 | 38.59 | C |
| ATOM | 3513 | CZ  | TYR | D | 62 | -22.793 | 54.704 | -19.110 | 1.00 | 39.56 | C |
| ATOM | 3514 | OH  | TYR | D | 62 | -22.835 | 55.966 | -19.637 | 1.00 | 52.65 | O |
| ATOM | 3515 | N   | ILE | D | 63 | -23.384 | 49.301 | -20.122 | 1.00 | 47.69 | N |
| ATOM | 3516 | CA  | ILE | D | 63 | -23.622 | 49.412 | -21.595 | 1.00 | 46.10 | C |
| ATOM | 3517 | C   | ILE | D | 63 | -24.809 | 48.531 | -22.020 | 1.00 | 50.64 | C |
| ATOM | 3518 | O   | ILE | D | 63 | -25.468 | 48.875 | -23.019 | 1.00 | 49.01 | O |
| ATOM | 3519 | CB  | ILE | D | 63 | -22.387 | 49.119 | -22.483 | 1.00 | 42.10 | C |
| ATOM | 3520 | CG1 | ILE | D | 63 | -21.789 | 47.722 | -22.272 | 1.00 | 40.22 | C |
| ATOM | 3521 | CG2 | ILE | D | 63 | -21.351 | 50.224 | -22.345 | 1.00 | 41.42 | C |
| ATOM | 3522 | CD1 | ILE | D | 63 | -20.750 | 47.352 | -23.317 | 1.00 | 40.17 | C |
| ATOM | 3523 | N   | PHE | D | 64 | -25.069 | 47.423 | -21.300 | 1.00 | 48.44 | N |
| ATOM | 3524 | CA  | PHE | D | 64 | -26.280 | 46.603 | -21.532 | 1.00 | 47.53 | C |
| ATOM | 3525 | C   | PHE | D | 64 | -27.504 | 47.249 | -20.849 | 1.00 | 49.61 | C |
| ATOM | 3526 | O   | PHE | D | 64 | -28.639 | 46.854 | -21.113 | 1.00 | 50.07 | O |
| ATOM | 3527 | CB  | PHE | D | 64 | -26.115 | 45.165 | -21.025 | 1.00 | 45.81 | C |
| ATOM | 3528 | CG  | PHE | D | 64 | -25.230 | 44.235 | -21.822 | 1.00 | 47.03 | C |
| ATOM | 3529 | CD1 | PHE | D | 64 | -25.220 | 44.240 | -23.210 | 1.00 | 51.34 | C |
| ATOM | 3530 | CD2 | PHE | D | 64 | -24.422 | 43.308 | -21.173 | 1.00 | 50.29 | C |
| ATOM | 3531 | CE1 | PHE | D | 64 | -24.425 | 43.351 | -23.929 | 1.00 | 50.20 | C |
| ATOM | 3532 | CE2 | PHE | D | 64 | -23.626 | 42.420 | -21.890 | 1.00 | 52.86 | C |
| ATOM | 3533 | CZ  | PHE | D | 64 | -23.628 | 42.443 | -23.270 | 1.00 | 48.63 | C |
| ATOM | 3534 | N   | GLN | D | 65 | -27.267 | 48.214 | -19.945 | 1.00 | 49.04 | N |
| ATOM | 3535 | CA  | GLN | D | 65 | -28.295 | 48.805 | -19.094 | 1.00 | 46.29 | C |
| ATOM | 3536 | C   | GLN | D | 65 | -29.097 | 47.699 | -18.383 | 1.00 | 44.86 | C |
| ATOM | 3537 | O   | GLN | D | 65 | -30.292 | 47.586 | -18.591 | 1.00 | 50.85 | O |

|      |      |     |     |   |    |         |        |         |      |       |     |
|------|------|-----|-----|---|----|---------|--------|---------|------|-------|-----|
| ATOM | 3538 | CB  | GLN | D | 65 | -29.167 | 49.725 | -19.953 | 1.00 | 49.83 | C   |
| ATOM | 3539 | CG  | GLN | D | 65 | -28.509 | 51.060 | -20.304 | 1.00 | 50.79 | C   |
| ATOM | 3540 | CD  | GLN | D | 65 | -28.451 | 51.961 | -19.092 | 1.00 | 54.16 | C   |
| ATOM | 3541 | NE2 | GLN | D | 65 | -27.294 | 52.541 | -18.821 | 1.00 | 59.21 | N   |
| ATOM | 3542 | OE1 | GLN | D | 65 | -29.428 | 52.103 | -18.370 | 1.00 | 58.85 | O   |
| ATOM | 3543 | N   | THR | D | 66 | -28.411 | 46.903 | -17.546 | 1.00 | 44.74 | N   |
| ATOM | 3544 | CA  | THR | D | 66 | -28.975 | 45.854 | -16.633 | 1.00 | 47.30 | C   |
| ATOM | 3545 | C   | THR | D | 66 | -28.349 | 45.946 | -15.225 | 1.00 | 50.48 | C   |
| ATOM | 3546 | O   | THR | D | 66 | -27.291 | 46.542 | -15.034 | 1.00 | 51.45 | O   |
| ATOM | 3547 | CB  | THR | D | 66 | -28.741 | 44.428 | -17.170 | 1.00 | 45.49 | C   |
| ATOM | 3548 | CG2 | THR | D | 66 | -27.351 | 44.218 | -17.729 | 1.00 | 44.99 | C   |
| ATOM | 3549 | OG1 | THR | D | 66 | -28.940 | 43.446 | -16.146 | 1.00 | 40.71 | O   |
| ATOM | 3550 | N   | GLU | D | 67 | -29.016 | 45.309 | -14.251 | 1.00 | 56.55 | N   |
| ATOM | 3551 | CA  | GLU | D | 67 | -28.563 | 45.127 | -12.860 | 1.00 | 54.91 | C   |
| ATOM | 3552 | C   | GLU | D | 67 | -28.117 | 43.672 | -12.596 | 1.00 | 52.31 | C   |
| ATOM | 3553 | O   | GLU | D | 67 | -27.768 | 43.346 | -11.462 | 1.00 | 47.34 | O   |
| ATOM | 3554 | CB  | GLU | D | 67 | -29.702 | 45.491 | -11.898 | 1.00 | 59.30 | C   |
| ATOM | 3555 | CG  | GLU | D | 67 | -29.780 | 46.974 | -11.556 | 1.00 | 65.83 | C   |
| ATOM | 3556 | CD  | GLU | D | 67 | -30.989 | 47.394 | -10.723 | 1.00 | 71.45 | C   |
| ATOM | 3557 | OE1 | GLU | D | 67 | -32.012 | 46.669 | -10.738 | 1.00 | 68.35 | O   |
| ATOM | 3558 | OE2 | GLU | D | 67 | -30.917 | 48.459 | -10.072 | 1.00 | 76.05 | O1- |
| ATOM | 3559 | N   | ASN | D | 68 | -28.111 | 42.804 | -13.625 | 1.00 | 52.52 | N   |
| ATOM | 3560 | CA  | ASN | D | 68 | -27.893 | 41.335 | -13.468 | 1.00 | 54.17 | C   |
| ATOM | 3561 | C   | ASN | D | 68 | -26.505 | 41.014 | -12.884 | 1.00 | 55.95 | C   |
| ATOM | 3562 | O   | ASN | D | 68 | -25.457 | 41.381 | -13.435 | 1.00 | 57.48 | O   |
| ATOM | 3563 | CB  | ASN | D | 68 | -28.027 | 40.578 | -14.792 | 1.00 | 56.61 | C   |
| ATOM | 3564 | CG  | ASN | D | 68 | -29.406 | 40.641 | -15.414 | 1.00 | 58.83 | C   |
| ATOM | 3565 | ND2 | ASN | D | 68 | -29.462 | 40.671 | -16.740 | 1.00 | 51.30 | N   |
| ATOM | 3566 | OD1 | ASN | D | 68 | -30.408 | 40.645 | -14.698 | 1.00 | 59.27 | O   |
| ATOM | 3567 | N   | ARG | D | 69 | -26.497 | 40.257 | -11.784 | 1.00 | 57.80 | N   |
| ATOM | 3568 | CA  | ARG | D | 69 | -25.266 | 39.689 | -11.251 | 1.00 | 57.20 | C   |
| ATOM | 3569 | C   | ARG | D | 69 | -24.637 | 38.746 | -12.285 | 1.00 | 51.99 | C   |
| ATOM | 3570 | O   | ARG | D | 69 | -23.438 | 38.539 | -12.229 | 1.00 | 46.21 | O   |

|      |      |     |     |   |    |         |        |         |      |       |     |
|------|------|-----|-----|---|----|---------|--------|---------|------|-------|-----|
| ATOM | 3571 | CB  | ARG | D | 69 | -25.504 | 38.923 | -9.943  | 1.00 | 57.05 | C   |
| ATOM | 3572 | CG  | ARG | D | 69 | -25.542 | 39.796 | -8.697  | 1.00 | 64.79 | C   |
| ATOM | 3573 | CD  | ARG | D | 69 | -25.898 | 39.002 | -7.446  | 1.00 | 71.03 | C   |
| ATOM | 3574 | NE  | ARG | D | 69 | -24.805 | 38.179 | -6.936  | 1.00 | 69.20 | N   |
| ATOM | 3575 | CZ  | ARG | D | 69 | -24.908 | 37.333 | -5.908  | 1.00 | 67.19 | C   |
| ATOM | 3576 | NH1 | ARG | D | 69 | -26.096 | 36.940 | -5.482  | 1.00 | 62.83 | N1+ |
| ATOM | 3577 | NH2 | ARG | D | 69 | -23.820 | 36.882 | -5.308  | 1.00 | 64.15 | N   |
| ATOM | 3578 | N   | THR | D | 70 | -25.455 | 38.132 | -13.160 | 1.00 | 47.56 | N   |
| ATOM | 3579 | CA  | THR | D | 70 | -24.981 | 37.062 | -14.081 | 1.00 | 46.89 | C   |
| ATOM | 3580 | C   | THR | D | 70 | -24.534 | 37.711 | -15.406 | 1.00 | 47.60 | C   |
| ATOM | 3581 | O   | THR | D | 70 | -25.187 | 37.547 | -16.484 | 1.00 | 39.60 | O   |
| ATOM | 3582 | CB  | THR | D | 70 | -26.042 | 35.963 | -14.235 | 1.00 | 48.60 | C   |
| ATOM | 3583 | CG2 | THR | D | 70 | -25.452 | 34.694 | -14.804 | 1.00 | 50.33 | C   |
| ATOM | 3584 | OG1 | THR | D | 70 | -26.663 | 35.664 | -12.978 | 1.00 | 47.90 | O   |
| ATOM | 3585 | N   | THR | D | 71 | -23.440 | 38.489 | -15.289 | 1.00 | 43.38 | N   |
| ATOM | 3586 | CA  | THR | D | 71 | -22.846 | 39.306 | -16.343 | 1.00 | 41.74 | C   |
| ATOM | 3587 | C   | THR | D | 71 | -21.362 | 38.919 | -16.447 | 1.00 | 42.49 | C   |
| ATOM | 3588 | O   | THR | D | 71 | -20.695 | 38.896 | -15.436 | 1.00 | 43.15 | O   |
| ATOM | 3589 | CB  | THR | D | 71 | -23.110 | 40.787 | -16.059 | 1.00 | 41.79 | C   |
| ATOM | 3590 | CG2 | THR | D | 71 | -22.607 | 41.729 | -17.137 | 1.00 | 42.70 | C   |
| ATOM | 3591 | OG1 | THR | D | 71 | -24.518 | 40.963 | -15.916 | 1.00 | 39.57 | O   |
| ATOM | 3592 | N   | MET | D | 72 | -20.882 | 38.538 | -17.646 | 1.00 | 38.09 | N   |
| ATOM | 3593 | CA  | MET | D | 72 | -19.569 | 37.930 | -17.760 | 1.00 | 38.96 | C   |
| ATOM | 3594 | C   | MET | D | 72 | -19.067 | 37.927 | -19.213 | 1.00 | 38.90 | C   |
| ATOM | 3595 | O   | MET | D | 72 | -19.626 | 38.604 | -20.120 | 1.00 | 35.16 | O   |
| ATOM | 3596 | CB  | MET | D | 72 | -19.563 | 36.513 | -17.161 | 1.00 | 42.43 | C   |
| ATOM | 3597 | CG  | MET | D | 72 | -20.142 | 35.421 | -18.050 | 1.00 | 42.13 | C   |
| ATOM | 3598 | SD  | MET | D | 72 | -20.574 | 33.904 | -17.136 | 1.00 | 42.57 | S   |
| ATOM | 3599 | CE  | MET | D | 72 | -22.061 | 34.440 | -16.298 | 1.00 | 37.91 | C   |
| ATOM | 3600 | N   | CYS | D | 73 | -17.912 | 37.284 | -19.423 | 1.00 | 35.43 | N   |
| ATOM | 3601 | CA  | CYS | D | 73 | -17.440 | 37.130 | -20.764 | 1.00 | 39.47 | C   |
| ATOM | 3602 | C   | CYS | D | 73 | -17.166 | 35.649 | -21.073 | 1.00 | 41.15 | C   |
| ATOM | 3603 | O   | CYS | D | 73 | -16.790 | 34.858 | -20.211 | 1.00 | 41.71 | O   |

|      |      |     |     |   |    |         |        |         |      |       |   |
|------|------|-----|-----|---|----|---------|--------|---------|------|-------|---|
| ATOM | 3604 | CB  | CYS | D | 73 | -16.223 | 37.998 | -21.043 | 1.00 | 37.66 | C |
| ATOM | 3605 | SG  | CYS | D | 73 | -16.508 | 39.768 | -20.755 | 1.00 | 42.15 | S |
| ATOM | 3606 | N   | ILE | D | 74 | -17.364 | 35.302 | -22.346 | 1.00 | 37.81 | N |
| ATOM | 3607 | CA  | ILE | D | 74 | -16.940 | 34.067 | -22.883 | 1.00 | 38.06 | C |
| ATOM | 3608 | C   | ILE | D | 74 | -15.637 | 34.311 | -23.646 | 1.00 | 39.21 | C |
| ATOM | 3609 | O   | ILE | D | 74 | -15.498 | 35.345 | -24.327 | 1.00 | 41.58 | O |
| ATOM | 3610 | CB  | ILE | D | 74 | -18.037 | 33.479 | -23.785 | 1.00 | 37.54 | C |
| ATOM | 3611 | CG1 | ILE | D | 74 | -19.388 | 33.468 | -23.071 | 1.00 | 38.27 | C |
| ATOM | 3612 | CG2 | ILE | D | 74 | -17.623 | 32.097 | -24.239 | 1.00 | 39.01 | C |
| ATOM | 3613 | CD1 | ILE | D | 74 | -20.502 | 33.039 | -23.935 | 1.00 | 39.12 | C |
| ATOM | 3614 | N   | THR | D | 75 | -14.712 | 33.348 | -23.537 | 1.00 | 36.69 | N |
| ATOM | 3615 | CA  | THR | D | 75 | -13.413 | 33.425 | -24.173 | 1.00 | 33.98 | C |
| ATOM | 3616 | C   | THR | D | 75 | -13.556 | 32.846 | -25.582 | 1.00 | 34.79 | C |
| ATOM | 3617 | O   | THR | D | 75 | -13.535 | 31.629 | -25.769 | 1.00 | 32.22 | O |
| ATOM | 3618 | CB  | THR | D | 75 | -12.370 | 32.729 | -23.286 | 1.00 | 33.22 | C |
| ATOM | 3619 | CG2 | THR | D | 75 | -10.980 | 32.657 | -23.880 | 1.00 | 30.89 | C |
| ATOM | 3620 | OG1 | THR | D | 75 | -12.337 | 33.431 | -22.041 | 1.00 | 34.62 | O |
| ATOM | 3621 | N   | GLY | D | 76 | -13.751 | 33.748 | -26.548 | 1.00 | 37.46 | N |
| ATOM | 3622 | CA  | GLY | D | 76 | -13.916 | 33.437 | -27.976 | 1.00 | 36.63 | C |
| ATOM | 3623 | C   | GLY | D | 76 | -14.663 | 34.547 | -28.710 | 1.00 | 36.20 | C |
| ATOM | 3624 | O   | GLY | D | 76 | -15.057 | 35.555 | -28.107 | 1.00 | 40.37 | O |
| ATOM | 3625 | N   | SER | D | 77 | -14.844 | 34.369 | -30.018 | 1.00 | 33.64 | N |
| ATOM | 3626 | CA  | SER | D | 77 | -15.477 | 35.362 | -30.874 | 1.00 | 37.76 | C |
| ATOM | 3627 | C   | SER | D | 77 | -16.976 | 35.445 | -30.551 | 1.00 | 36.42 | C |
| ATOM | 3628 | O   | SER | D | 77 | -17.479 | 34.635 | -29.784 | 1.00 | 38.48 | O |
| ATOM | 3629 | CB  | SER | D | 77 | -15.222 | 35.052 | -32.344 | 1.00 | 43.47 | C |
| ATOM | 3630 | OG  | SER | D | 77 | -16.312 | 34.336 | -32.941 | 1.00 | 47.84 | O |
| ATOM | 3631 | N   | ALA | D | 78 | -17.688 | 36.423 | -31.131 | 1.00 | 34.01 | N |
| ATOM | 3632 | CA  | ALA | D | 78 | -19.121 | 36.684 | -30.759 | 1.00 | 37.08 | C |
| ATOM | 3633 | C   | ALA | D | 78 | -20.081 | 35.500 | -31.022 | 1.00 | 36.91 | C |
| ATOM | 3634 | O   | ALA | D | 78 | -21.139 | 35.433 | -30.408 | 1.00 | 41.77 | O |
| ATOM | 3635 | CB  | ALA | D | 78 | -19.625 | 37.903 | -31.475 | 1.00 | 38.39 | C |
| ATOM | 3636 | N   | HIS | D | 79 | -19.751 | 34.592 | -31.939 | 1.00 | 37.88 | N |

|      |      |     |     |   |    |         |        |         |      |       |   |
|------|------|-----|-----|---|----|---------|--------|---------|------|-------|---|
| ATOM | 3637 | CA  | HIS | D | 79 | -20.557 | 33.399 | -32.187 | 1.00 | 43.88 | C |
| ATOM | 3638 | C   | HIS | D | 79 | -20.830 | 32.654 | -30.885 | 1.00 | 41.94 | C |
| ATOM | 3639 | O   | HIS | D | 79 | -21.869 | 31.994 | -30.718 | 1.00 | 47.19 | O |
| ATOM | 3640 | CB  | HIS | D | 79 | -19.845 | 32.405 | -33.103 | 1.00 | 44.85 | C |
| ATOM | 3641 | CG  | HIS | D | 79 | -20.080 | 32.599 | -34.555 | 1.00 | 52.21 | C |
| ATOM | 3642 | CD2 | HIS | D | 79 | -20.694 | 31.805 | -35.457 | 1.00 | 56.27 | C |
| ATOM | 3643 | ND1 | HIS | D | 79 | -19.557 | 33.675 | -35.255 | 1.00 | 52.61 | N |
| ATOM | 3644 | CE1 | HIS | D | 79 | -19.860 | 33.536 | -36.527 | 1.00 | 56.50 | C |
| ATOM | 3645 | NE2 | HIS | D | 79 | -20.551 | 32.394 | -36.678 | 1.00 | 56.92 | N |
| ATOM | 3646 | N   | THR | D | 80 | -19.856 | 32.771 | -29.995 | 1.00 | 39.62 | N |
| ATOM | 3647 | CA  | THR | D | 80 | -19.741 | 32.029 | -28.756 | 1.00 | 42.32 | C |
| ATOM | 3648 | C   | THR | D | 80 | -20.862 | 32.461 | -27.793 | 1.00 | 43.95 | C |
| ATOM | 3649 | O   | THR | D | 80 | -21.348 | 31.682 | -26.992 | 1.00 | 44.28 | O |
| ATOM | 3650 | CB  | THR | D | 80 | -18.303 | 32.261 | -28.291 | 1.00 | 46.26 | C |
| ATOM | 3651 | CG2 | THR | D | 80 | -18.241 | 33.133 | -27.064 | 1.00 | 43.10 | C |
| ATOM | 3652 | OG1 | THR | D | 80 | -17.624 | 31.014 | -28.166 | 1.00 | 53.60 | O |
| ATOM | 3653 | N   | GLY | D | 81 | -21.290 | 33.725 | -27.892 | 1.00 | 43.10 | N |
| ATOM | 3654 | CA  | GLY | D | 81 | -22.468 | 34.197 | -27.201 | 1.00 | 43.98 | C |
| ATOM | 3655 | C   | GLY | D | 81 | -23.736 | 33.510 | -27.676 | 1.00 | 41.33 | C |
| ATOM | 3656 | O   | GLY | D | 81 | -24.591 | 33.154 | -26.883 | 1.00 | 44.09 | O |
| ATOM | 3657 | N   | MET | D | 82 | -23.873 | 33.371 | -28.994 | 1.00 | 44.37 | N |
| ATOM | 3658 | CA  | MET | D | 82 | -25.007 | 32.664 | -29.595 | 1.00 | 45.73 | C |
| ATOM | 3659 | C   | MET | D | 82 | -24.966 | 31.192 | -29.166 | 1.00 | 41.32 | C |
| ATOM | 3660 | O   | MET | D | 82 | -25.957 | 30.669 | -28.746 | 1.00 | 40.48 | O |
| ATOM | 3661 | CB  | MET | D | 82 | -24.983 | 32.761 | -31.120 | 1.00 | 45.13 | C |
| ATOM | 3662 | CG  | MET | D | 82 | -26.247 | 32.233 | -31.770 | 1.00 | 46.17 | C |
| ATOM | 3663 | SD  | MET | D | 82 | -26.038 | 32.098 | -33.554 | 1.00 | 46.32 | S |
| ATOM | 3664 | CE  | MET | D | 82 | -26.170 | 33.823 | -34.017 | 1.00 | 43.33 | C |
| ATOM | 3665 | N   | GLU | D | 83 | -23.786 | 30.570 | -29.241 | 1.00 | 43.93 | N |
| ATOM | 3666 | CA  | GLU | D | 83 | -23.560 | 29.206 | -28.794 | 1.00 | 45.31 | C |
| ATOM | 3667 | C   | GLU | D | 83 | -23.947 | 29.060 | -27.319 | 1.00 | 47.10 | C |
| ATOM | 3668 | O   | GLU | D | 83 | -24.667 | 28.149 | -26.934 | 1.00 | 51.80 | O |
| ATOM | 3669 | CB  | GLU | D | 83 | -22.092 | 28.819 | -28.999 | 1.00 | 50.12 | C |

|      |      |     |     |   |    |         |        |         |      |       |     |
|------|------|-----|-----|---|----|---------|--------|---------|------|-------|-----|
| ATOM | 3670 | CG  | GLU | D | 83 | -21.667 | 28.701 | -30.458 | 1.00 | 49.90 | C   |
| ATOM | 3671 | CD  | GLU | D | 83 | -21.936 | 27.361 | -31.147 | 1.00 | 52.89 | C   |
| ATOM | 3672 | OE1 | GLU | D | 83 | -22.822 | 26.599 | -30.667 | 1.00 | 51.22 | O   |
| ATOM | 3673 | OE2 | GLU | D | 83 | -21.247 | 27.075 | -32.171 | 1.00 | 45.58 | O1- |
| ATOM | 3674 | N   | ALA | D | 84 | -23.459 | 29.968 | -26.480 | 1.00 | 53.66 | N   |
| ATOM | 3675 | CA  | ALA | D | 84 | -23.593 | 29.808 | -25.013 | 1.00 | 54.33 | C   |
| ATOM | 3676 | C   | ALA | D | 84 | -25.061 | 29.899 | -24.586 | 1.00 | 46.93 | C   |
| ATOM | 3677 | O   | ALA | D | 84 | -25.506 | 29.078 | -23.787 | 1.00 | 46.41 | O   |
| ATOM | 3678 | CB  | ALA | D | 84 | -22.754 | 30.832 | -24.275 | 1.00 | 54.83 | C   |
| ATOM | 3679 | N   | LEU | D | 85 | -25.768 | 30.917 | -25.098 | 1.00 | 46.12 | N   |
| ATOM | 3680 | CA  | LEU | D | 85 | -27.216 | 31.143 | -24.835 | 1.00 | 47.11 | C   |
| ATOM | 3681 | C   | LEU | D | 85 | -28.057 | 29.910 | -25.207 | 1.00 | 44.62 | C   |
| ATOM | 3682 | O   | LEU | D | 85 | -28.886 | 29.496 | -24.417 | 1.00 | 42.57 | O   |
| ATOM | 3683 | CB  | LEU | D | 85 | -27.686 | 32.374 | -25.622 | 1.00 | 49.26 | C   |
| ATOM | 3684 | CG  | LEU | D | 85 | -27.358 | 33.742 | -25.015 | 1.00 | 50.43 | C   |
| ATOM | 3685 | CD1 | LEU | D | 85 | -28.146 | 34.843 | -25.715 | 1.00 | 49.86 | C   |
| ATOM | 3686 | CD2 | LEU | D | 85 | -27.661 | 33.777 | -23.515 | 1.00 | 49.36 | C   |
| ATOM | 3687 | N   | LEU | D | 86 | -27.835 | 29.324 | -26.401 | 1.00 | 47.92 | N   |
| ATOM | 3688 | CA  | LEU | D | 86 | -28.637 | 28.165 | -26.911 | 1.00 | 46.47 | C   |
| ATOM | 3689 | C   | LEU | D | 86 | -28.295 | 26.878 | -26.149 | 1.00 | 52.19 | C   |
| ATOM | 3690 | O   | LEU | D | 86 | -29.203 | 26.215 | -25.626 | 1.00 | 51.52 | O   |
| ATOM | 3691 | CB  | LEU | D | 86 | -28.363 | 27.971 | -28.404 | 1.00 | 44.60 | C   |
| ATOM | 3692 | CG  | LEU | D | 86 | -28.794 | 29.111 | -29.331 | 1.00 | 39.14 | C   |
| ATOM | 3693 | CD1 | LEU | D | 86 | -28.355 | 28.832 | -30.753 | 1.00 | 38.15 | C   |
| ATOM | 3694 | CD2 | LEU | D | 86 | -30.288 | 29.331 | -29.289 | 1.00 | 42.20 | C   |
| ATOM | 3695 | N   | CYS | D | 87 | -26.989 | 26.544 | -26.108 | 1.00 | 56.57 | N   |
| ATOM | 3696 | CA  | CYS | D | 87 | -26.425 | 25.365 | -25.400 | 1.00 | 52.70 | C   |
| ATOM | 3697 | C   | CYS | D | 87 | -26.913 | 25.307 | -23.953 | 1.00 | 55.81 | C   |
| ATOM | 3698 | O   | CYS | D | 87 | -27.128 | 24.219 | -23.431 | 1.00 | 61.15 | O   |
| ATOM | 3699 | CB  | CYS | D | 87 | -24.902 | 25.405 | -25.360 | 1.00 | 53.31 | C   |
| ATOM | 3700 | SG  | CYS | D | 87 | -24.119 | 23.913 | -24.681 | 1.00 | 48.43 | S   |
| ATOM | 3701 | N   | ASN | D | 88 | -27.060 | 26.482 | -23.323 | 1.00 | 53.47 | N   |
| ATOM | 3702 | CA  | ASN | D | 88 | -27.321 | 26.584 | -21.889 | 1.00 | 51.88 | C   |

|      |      |     |     |   |    |         |        |         |      |       |     |
|------|------|-----|-----|---|----|---------|--------|---------|------|-------|-----|
| ATOM | 3703 | C   | ASN | D | 88 | -28.821 | 26.471 | -21.575 | 1.00 | 51.82 | C   |
| ATOM | 3704 | O   | ASN | D | 88 | -29.169 | 25.868 | -20.547 | 1.00 | 43.61 | O   |
| ATOM | 3705 | CB  | ASN | D | 88 | -26.756 | 27.881 | -21.294 | 1.00 | 53.42 | C   |
| ATOM | 3706 | CG  | ASN | D | 88 | -25.348 | 27.714 | -20.761 | 1.00 | 51.54 | C   |
| ATOM | 3707 | ND2 | ASN | D | 88 | -24.356 | 28.087 | -21.553 | 1.00 | 41.01 | N   |
| ATOM | 3708 | OD1 | ASN | D | 88 | -25.166 | 27.256 | -19.634 | 1.00 | 52.49 | O   |
| ATOM | 3709 | N   | LEU | D | 89 | -29.682 | 27.065 | -22.427 | 1.00 | 51.97 | N   |
| ATOM | 3710 | CA  | LEU | D | 89 | -31.121 | 27.262 | -22.133 | 1.00 | 47.15 | C   |
| ATOM | 3711 | C   | LEU | D | 89 | -32.025 | 26.262 | -22.884 | 1.00 | 52.38 | C   |
| ATOM | 3712 | O   | LEU | D | 89 | -33.250 | 26.431 | -22.865 | 1.00 | 58.40 | O   |
| ATOM | 3713 | CB  | LEU | D | 89 | -31.501 | 28.687 | -22.528 | 1.00 | 42.50 | C   |
| ATOM | 3714 | CG  | LEU | D | 89 | -30.908 | 29.777 | -21.660 | 1.00 | 45.37 | C   |
| ATOM | 3715 | CD1 | LEU | D | 89 | -30.971 | 31.121 | -22.363 | 1.00 | 45.44 | C   |
| ATOM | 3716 | CD2 | LEU | D | 89 | -31.621 | 29.839 | -20.314 | 1.00 | 49.99 | C   |
| ATOM | 3717 | N   | LEU | D | 90 | -31.453 | 25.237 | -23.529 | 1.00 | 50.39 | N   |
| ATOM | 3718 | CA  | LEU | D | 90 | -32.215 | 24.249 | -24.305 | 1.00 | 50.48 | C   |
| ATOM | 3719 | C   | LEU | D | 90 | -31.712 | 22.833 | -23.991 | 1.00 | 54.54 | C   |
| ATOM | 3720 | O   | LEU | D | 90 | -30.549 | 22.516 | -24.265 | 1.00 | 63.49 | O   |
| ATOM | 3721 | CB  | LEU | D | 90 | -32.046 | 24.555 | -25.801 | 1.00 | 48.89 | C   |
| ATOM | 3722 | CG  | LEU | D | 90 | -32.472 | 25.952 | -26.244 | 1.00 | 46.22 | C   |
| ATOM | 3723 | CD1 | LEU | D | 90 | -32.025 | 26.229 | -27.673 | 1.00 | 43.64 | C   |
| ATOM | 3724 | CD2 | LEU | D | 90 | -33.976 | 26.127 | -26.106 | 1.00 | 43.71 | C   |
| ATOM | 3725 | N   | GLU | D | 91 | -32.595 | 21.980 | -23.455 | 1.00 | 56.67 | N   |
| ATOM | 3726 | CA  | GLU | D | 91 | -32.366 | 20.510 | -23.390 | 1.00 | 59.26 | C   |
| ATOM | 3727 | C   | GLU | D | 91 | -32.813 | 19.866 | -24.715 | 1.00 | 52.32 | C   |
| ATOM | 3728 | O   | GLU | D | 91 | -33.527 | 20.500 | -25.471 | 1.00 | 47.34 | O   |
| ATOM | 3729 | CB  | GLU | D | 91 | -33.144 | 19.887 | -22.224 | 1.00 | 62.73 | C   |
| ATOM | 3730 | CG  | GLU | D | 91 | -33.007 | 20.642 | -20.922 | 1.00 | 61.68 | C   |
| ATOM | 3731 | CD  | GLU | D | 91 | -33.294 | 19.842 | -19.661 | 1.00 | 66.44 | C   |
| ATOM | 3732 | OE1 | GLU | D | 91 | -34.171 | 20.276 | -18.895 | 1.00 | 64.33 | O   |
| ATOM | 3733 | OE2 | GLU | D | 91 | -32.609 | 18.814 | -19.425 | 1.00 | 67.90 | O1- |
| ATOM | 3734 | N   | GLU | D | 92 | -32.422 | 18.604 | -24.964 | 1.00 | 56.29 | N   |
| ATOM | 3735 | CA  | GLU | D | 92 | -33.005 | 17.793 | -26.076 | 1.00 | 61.37 | C   |

|      |      |     |     |   |    |         |        |         |      |       |     |
|------|------|-----|-----|---|----|---------|--------|---------|------|-------|-----|
| ATOM | 3736 | C   | GLU | D | 92 | -34.521 | 18.032 | -26.068 | 1.00 | 61.41 | C   |
| ATOM | 3737 | O   | GLU | D | 92 | -35.147 | 17.979 | -24.993 | 1.00 | 54.16 | O   |
| ATOM | 3738 | CB  | GLU | D | 92 | -32.754 | 16.280 | -25.960 | 1.00 | 64.27 | C   |
| ATOM | 3739 | CG  | GLU | D | 92 | -31.289 | 15.854 | -25.802 | 1.00 | 76.06 | C   |
| ATOM | 3740 | CD  | GLU | D | 92 | -30.405 | 15.763 | -27.049 | 1.00 | 83.74 | C   |
| ATOM | 3741 | OE1 | GLU | D | 92 | -29.240 | 15.245 | -26.939 | 1.00 | 66.91 | O   |
| ATOM | 3742 | OE2 | GLU | D | 92 | -30.859 | 16.207 | -28.128 | 1.00 | 90.80 | O1- |
| ATOM | 3743 | N   | GLY | D | 93 | -35.083 | 18.416 | -27.227 | 1.00 | 60.57 | N   |
| ATOM | 3744 | CA  | GLY | D | 93 | -36.548 | 18.543 | -27.416 | 1.00 | 58.30 | C   |
| ATOM | 3745 | C   | GLY | D | 93 | -37.205 | 19.848 | -26.948 | 1.00 | 61.85 | C   |
| ATOM | 3746 | O   | GLY | D | 93 | -38.364 | 20.055 | -27.273 | 1.00 | 66.22 | O   |
| ATOM | 3747 | N   | ASP | D | 94 | -36.528 | 20.736 | -26.203 | 1.00 | 58.22 | N   |
| ATOM | 3748 | CA  | ASP | D | 94 | -37.108 | 22.074 | -25.923 | 1.00 | 59.62 | C   |
| ATOM | 3749 | C   | ASP | D | 94 | -37.406 | 22.817 | -27.238 | 1.00 | 57.58 | C   |
| ATOM | 3750 | O   | ASP | D | 94 | -36.732 | 22.595 | -28.258 | 1.00 | 60.72 | O   |
| ATOM | 3751 | CB  | ASP | D | 94 | -36.178 | 22.923 | -25.058 | 1.00 | 64.83 | C   |
| ATOM | 3752 | CG  | ASP | D | 94 | -35.995 | 22.360 | -23.665 | 1.00 | 69.76 | C   |
| ATOM | 3753 | OD1 | ASP | D | 94 | -36.766 | 21.440 | -23.300 | 1.00 | 68.54 | O   |
| ATOM | 3754 | OD2 | ASP | D | 94 | -35.074 | 22.827 | -22.971 | 1.00 | 68.38 | O1- |
| ATOM | 3755 | N   | ILE | D | 95 | -38.410 | 23.704 | -27.209 | 1.00 | 53.42 | N   |
| ATOM | 3756 | CA  | ILE | D | 95 | -38.863 | 24.433 | -28.399 | 1.00 | 53.73 | C   |
| ATOM | 3757 | C   | ILE | D | 95 | -38.272 | 25.848 | -28.380 | 1.00 | 55.86 | C   |
| ATOM | 3758 | O   | ILE | D | 95 | -38.598 | 26.657 | -27.508 | 1.00 | 53.45 | O   |
| ATOM | 3759 | CB  | ILE | D | 95 | -40.405 | 24.497 | -28.495 | 1.00 | 55.50 | C   |
| ATOM | 3760 | CG1 | ILE | D | 95 | -41.065 | 23.113 | -28.457 | 1.00 | 59.23 | C   |
| ATOM | 3761 | CG2 | ILE | D | 95 | -40.842 | 25.275 | -29.732 | 1.00 | 55.22 | C   |
| ATOM | 3762 | CD1 | ILE | D | 95 | -42.581 | 23.161 | -28.347 | 1.00 | 55.40 | C   |
| ATOM | 3763 | N   | VAL | D | 96 | -37.489 | 26.159 | -29.412 | 1.00 | 52.23 | N   |
| ATOM | 3764 | CA  | VAL | D | 96 | -36.958 | 27.480 | -29.618 | 1.00 | 55.52 | C   |
| ATOM | 3765 | C   | VAL | D | 96 | -37.585 | 28.039 | -30.888 | 1.00 | 55.23 | C   |
| ATOM | 3766 | O   | VAL | D | 96 | -37.501 | 27.405 | -31.945 | 1.00 | 53.19 | O   |
| ATOM | 3767 | CB  | VAL | D | 96 | -35.417 | 27.483 | -29.731 | 1.00 | 63.35 | C   |
| ATOM | 3768 | CG1 | VAL | D | 96 | -34.895 | 26.507 | -30.788 | 1.00 | 64.20 | C   |



|      |      |     |     |   |     |         |        |         |      |       |   |
|------|------|-----|-----|---|-----|---------|--------|---------|------|-------|---|
| ATOM | 3769 | CG2 | VAL | D | 96  | -34.867 | 28.890 | -29.982 | 1.00 | 56.68 | C |
| ATOM | 3770 | N   | LEU | D | 97  | -38.150 | 29.243 | -30.780 | 1.00 | 54.42 | N |
| ATOM | 3771 | CA  | LEU | D | 97  | -38.593 | 29.982 | -31.941 | 1.00 | 59.84 | C |
| ATOM | 3772 | C   | LEU | D | 97  | -37.523 | 31.028 | -32.317 | 1.00 | 61.51 | C |
| ATOM | 3773 | O   | LEU | D | 97  | -37.076 | 31.814 | -31.473 | 1.00 | 69.00 | O |
| ATOM | 3774 | CB  | LEU | D | 97  | -39.958 | 30.617 | -31.634 | 1.00 | 61.06 | C |
| ATOM | 3775 | CG  | LEU | D | 97  | -40.448 | 31.682 | -32.626 | 1.00 | 60.53 | C |
| ATOM | 3776 | CD1 | LEU | D | 97  | -40.643 | 31.118 | -34.026 | 1.00 | 58.91 | C |
| ATOM | 3777 | CD2 | LEU | D | 97  | -41.731 | 32.345 | -32.143 | 1.00 | 61.25 | C |
| ATOM | 3778 | N   | ILE | D | 98  | -37.163 | 31.066 | -33.605 | 1.00 | 55.73 | N |
| ATOM | 3779 | CA  | ILE | D | 98  | -36.131 | 31.935 | -34.115 | 1.00 | 55.48 | C |
| ATOM | 3780 | C   | ILE | D | 98  | -36.681 | 32.818 | -35.244 | 1.00 | 58.81 | C |
| ATOM | 3781 | O   | ILE | D | 98  | -37.185 | 32.322 | -36.245 | 1.00 | 59.64 | O |
| ATOM | 3782 | CB  | ILE | D | 98  | -34.949 | 31.068 | -34.569 | 1.00 | 53.98 | C |
| ATOM | 3783 | CG1 | ILE | D | 98  | -34.418 | 30.229 | -33.398 | 1.00 | 54.90 | C |
| ATOM | 3784 | CG2 | ILE | D | 98  | -33.879 | 31.927 | -35.221 | 1.00 | 53.95 | C |
| ATOM | 3785 | CD1 | ILE | D | 98  | -33.351 | 29.223 | -33.773 | 1.00 | 57.42 | C |
| ATOM | 3786 | N   | ALA | D | 99  | -36.541 | 34.139 | -35.080 | 1.00 | 61.02 | N |
| ATOM | 3787 | CA  | ALA | D | 99  | -36.983 | 35.132 | -36.065 | 1.00 | 61.39 | C |
| ATOM | 3788 | C   | ALA | D | 99  | -35.951 | 35.232 | -37.192 | 1.00 | 57.14 | C |
| ATOM | 3789 | O   | ALA | D | 99  | -34.935 | 35.853 | -37.049 | 1.00 | 58.08 | O |
| ATOM | 3790 | CB  | ALA | D | 99  | -37.193 | 36.463 | -35.393 | 1.00 | 66.07 | C |
| ATOM | 3791 | N   | ASN | D | 100 | -36.241 | 34.600 | -38.327 | 1.00 | 58.00 | N |
| ATOM | 3792 | CA  | ASN | D | 100 | -35.250 | 34.427 | -39.362 | 1.00 | 57.26 | C |
| ATOM | 3793 | C   | ASN | D | 100 | -35.526 | 35.384 | -40.529 | 1.00 | 60.55 | C |
| ATOM | 3794 | O   | ASN | D | 100 | -36.323 | 35.053 | -41.409 | 1.00 | 60.27 | O |
| ATOM | 3795 | CB  | ASN | D | 100 | -35.203 | 32.977 | -39.838 | 1.00 | 49.74 | C |
| ATOM | 3796 | CG  | ASN | D | 100 | -34.440 | 32.823 | -41.133 | 1.00 | 55.65 | C |
| ATOM | 3797 | ND2 | ASN | D | 100 | -34.683 | 31.714 | -41.809 | 1.00 | 57.04 | N |
| ATOM | 3798 | OD1 | ASN | D | 100 | -33.647 | 33.696 | -41.524 | 1.00 | 56.66 | O |
| ATOM | 3799 | N   | ASN | D | 101 | -34.835 | 36.538 | -40.540 | 1.00 | 59.06 | N |
| ATOM | 3800 | CA  | ASN | D | 101 | -34.771 | 37.407 | -41.721 | 1.00 | 58.57 | C |
| ATOM | 3801 | C   | ASN | D | 101 | -33.317 | 37.830 | -42.000 | 1.00 | 56.32 | C |

|      |      |     |     |   |     |         |        |         |      |       |   |
|------|------|-----|-----|---|-----|---------|--------|---------|------|-------|---|
| ATOM | 3802 | O   | ASN | D | 101 | -33.069 | 38.919 | -42.490 | 1.00 | 49.68 | O |
| ATOM | 3803 | CB  | ASN | D | 101 | -35.740 | 38.590 | -41.623 | 1.00 | 60.36 | C |
| ATOM | 3804 | CG  | ASN | D | 101 | -35.321 | 39.666 | -40.650 | 1.00 | 62.37 | C |
| ATOM | 3805 | ND2 | ASN | D | 101 | -36.186 | 40.647 | -40.431 | 1.00 | 61.71 | N |
| ATOM | 3806 | OD1 | ASN | D | 101 | -34.215 | 39.622 | -40.123 | 1.00 | 75.45 | O |
| ATOM | 3807 | N   | GLY | D | 102 | -32.362 | 36.930 | -41.744 | 1.00 | 53.75 | N |
| ATOM | 3808 | CA  | GLY | D | 102 | -30.976 | 37.165 | -42.139 | 1.00 | 51.27 | C |
| ATOM | 3809 | C   | GLY | D | 102 | -30.048 | 36.038 | -41.729 | 1.00 | 49.18 | C |
| ATOM | 3810 | O   | GLY | D | 102 | -30.429 | 35.098 | -41.047 | 1.00 | 48.91 | O |
| ATOM | 3811 | N   | ILE | D | 103 | -28.791 | 36.163 | -42.141 | 1.00 | 50.86 | N |
| ATOM | 3812 | CA  | ILE | D | 103 | -27.835 | 35.071 | -42.028 | 1.00 | 51.00 | C |
| ATOM | 3813 | C   | ILE | D | 103 | -27.532 | 34.732 | -40.570 | 1.00 | 50.59 | C |
| ATOM | 3814 | O   | ILE | D | 103 | -27.229 | 33.567 | -40.286 | 1.00 | 51.50 | O |
| ATOM | 3815 | CB  | ILE | D | 103 | -26.540 | 35.381 | -42.790 | 1.00 | 50.54 | C |
| ATOM | 3816 | CG1 | ILE | D | 103 | -25.654 | 34.134 | -42.853 | 1.00 | 51.85 | C |
| ATOM | 3817 | CG2 | ILE | D | 103 | -25.832 | 36.582 | -42.173 | 1.00 | 53.71 | C |
| ATOM | 3818 | CD1 | ILE | D | 103 | -24.822 | 34.032 | -44.109 | 1.00 | 53.76 | C |
| ATOM | 3819 | N   | TRP | D | 104 | -27.610 | 35.723 | -39.671 | 1.00 | 47.30 | N |
| ATOM | 3820 | CA  | TRP | D | 104 | -27.289 | 35.485 | -38.257 | 1.00 | 51.23 | C |
| ATOM | 3821 | C   | TRP | D | 104 | -28.310 | 34.522 | -37.631 | 1.00 | 47.83 | C |
| ATOM | 3822 | O   | TRP | D | 104 | -27.933 | 33.657 | -36.851 | 1.00 | 45.50 | O |
| ATOM | 3823 | CB  | TRP | D | 104 | -27.118 | 36.804 | -37.486 | 1.00 | 50.75 | C |
| ATOM | 3824 | CG  | TRP | D | 104 | -26.062 | 37.669 | -38.104 | 1.00 | 48.77 | C |
| ATOM | 3825 | CD1 | TRP | D | 104 | -26.241 | 38.891 | -38.682 | 1.00 | 48.05 | C |
| ATOM | 3826 | CD2 | TRP | D | 104 | -24.669 | 37.352 | -38.292 | 1.00 | 45.63 | C |
| ATOM | 3827 | CE2 | TRP | D | 104 | -24.076 | 38.445 | -38.965 | 1.00 | 47.19 | C |
| ATOM | 3828 | CE3 | TRP | D | 104 | -23.858 | 36.272 | -37.941 | 1.00 | 47.41 | C |
| ATOM | 3829 | NE1 | TRP | D | 104 | -25.058 | 39.363 | -39.195 | 1.00 | 44.56 | N |
| ATOM | 3830 | CZ2 | TRP | D | 104 | -22.722 | 38.480 | -39.295 | 1.00 | 53.57 | C |
| ATOM | 3831 | CZ3 | TRP | D | 104 | -22.522 | 36.293 | -38.283 | 1.00 | 51.04 | C |
| ATOM | 3832 | CH2 | TRP | D | 104 | -21.957 | 37.389 | -38.938 | 1.00 | 54.95 | C |
| ATOM | 3833 | N   | ALA | D | 105 | -29.570 | 34.616 | -38.058 | 1.00 | 50.33 | N |
| ATOM | 3834 | CA  | ALA | D | 105 | -30.623 | 33.664 | -37.662 | 1.00 | 52.55 | C |

|      |      |     |     |   |     |         |        |         |      |       |     |
|------|------|-----|-----|---|-----|---------|--------|---------|------|-------|-----|
| ATOM | 3835 | C   | ALA | D | 105 | -30.360 | 32.246 | -38.214 | 1.00 | 49.08 | C   |
| ATOM | 3836 | O   | ALA | D | 105 | -30.579 | 31.234 | -37.515 | 1.00 | 41.73 | O   |
| ATOM | 3837 | CB  | ALA | D | 105 | -31.961 | 34.206 | -38.102 | 1.00 | 53.58 | C   |
| ATOM | 3838 | N   | GLU | D | 106 | -29.848 | 32.141 | -39.446 | 1.00 | 50.77 | N   |
| ATOM | 3839 | CA  | GLU | D | 106 | -29.572 | 30.807 | -40.031 | 1.00 | 57.66 | C   |
| ATOM | 3840 | C   | GLU | D | 106 | -28.532 | 30.060 | -39.191 | 1.00 | 57.29 | C   |
| ATOM | 3841 | O   | GLU | D | 106 | -28.672 | 28.864 | -38.944 | 1.00 | 63.42 | O   |
| ATOM | 3842 | CB  | GLU | D | 106 | -28.982 | 30.879 | -41.438 | 1.00 | 63.39 | C   |
| ATOM | 3843 | CG  | GLU | D | 106 | -29.914 | 31.379 | -42.521 | 1.00 | 70.05 | C   |
| ATOM | 3844 | CD  | GLU | D | 106 | -29.198 | 31.331 | -43.859 | 1.00 | 72.10 | C   |
| ATOM | 3845 | OE1 | GLU | D | 106 | -28.034 | 30.849 | -43.873 | 1.00 | 63.70 | O   |
| ATOM | 3846 | OE2 | GLU | D | 106 | -29.786 | 31.770 | -44.867 | 1.00 | 69.93 | O1- |
| ATOM | 3847 | N   | ARG | D | 107 | -27.457 | 30.774 | -38.825 | 1.00 | 56.55 | N   |
| ATOM | 3848 | CA  | ARG | D | 107 | -26.436 | 30.293 | -37.901 | 1.00 | 50.59 | C   |
| ATOM | 3849 | C   | ARG | D | 107 | -27.113 | 29.791 | -36.612 | 1.00 | 49.93 | C   |
| ATOM | 3850 | O   | ARG | D | 107 | -26.747 | 28.742 | -36.088 | 1.00 | 49.12 | O   |
| ATOM | 3851 | CB  | ARG | D | 107 | -25.421 | 31.400 | -37.601 | 1.00 | 52.25 | C   |
| ATOM | 3852 | CG  | ARG | D | 107 | -24.457 | 31.727 | -38.735 | 1.00 | 54.22 | C   |
| ATOM | 3853 | CD  | ARG | D | 107 | -23.282 | 30.764 | -38.834 | 1.00 | 54.72 | C   |
| ATOM | 3854 | NE  | ARG | D | 107 | -22.056 | 31.364 | -39.363 | 1.00 | 55.06 | N   |
| ATOM | 3855 | CZ  | ARG | D | 107 | -21.692 | 31.373 | -40.643 | 1.00 | 52.91 | C   |
| ATOM | 3856 | NH1 | ARG | D | 107 | -22.588 | 31.138 | -41.586 | 1.00 | 53.09 | N1+ |
| ATOM | 3857 | NH2 | ARG | D | 107 | -20.424 | 31.574 | -40.964 | 1.00 | 49.63 | N   |
| ATOM | 3858 | N   | ALA | D | 108 | -28.107 | 30.538 | -36.116 | 1.00 | 45.38 | N   |
| ATOM | 3859 | CA  | ALA | D | 108 | -28.769 | 30.225 | -34.859 | 1.00 | 46.11 | C   |
| ATOM | 3860 | C   | ALA | D | 108 | -29.667 | 28.998 | -35.037 | 1.00 | 51.47 | C   |
| ATOM | 3861 | O   | ALA | D | 108 | -29.762 | 28.162 | -34.115 | 1.00 | 46.75 | O   |
| ATOM | 3862 | CB  | ALA | D | 108 | -29.543 | 31.416 | -34.362 | 1.00 | 46.35 | C   |
| ATOM | 3863 | N   | ILE | D | 109 | -30.294 | 28.875 | -36.220 | 1.00 | 51.03 | N   |
| ATOM | 3864 | CA  | ILE | D | 109 | -31.016 | 27.634 | -36.556 | 1.00 | 51.21 | C   |
| ATOM | 3865 | C   | ILE | D | 109 | -30.022 | 26.467 | -36.600 | 1.00 | 46.73 | C   |
| ATOM | 3866 | O   | ILE | D | 109 | -30.335 | 25.394 | -36.111 | 1.00 | 51.16 | O   |
| ATOM | 3867 | CB  | ILE | D | 109 | -31.848 | 27.764 | -37.850 | 1.00 | 53.84 | C   |

|      |      |     |     |   |     |         |        |         |      |       |   |
|------|------|-----|-----|---|-----|---------|--------|---------|------|-------|---|
| ATOM | 3868 | CG1 | ILE | D | 109 | -33.173 | 28.496 | -37.600 | 1.00 | 52.71 | C |
| ATOM | 3869 | CG2 | ILE | D | 109 | -32.088 | 26.402 | -38.488 | 1.00 | 55.15 | C |
| ATOM | 3870 | CD1 | ILE | D | 109 | -33.659 | 29.316 | -38.781 | 1.00 | 52.49 | C |
| ATOM | 3871 | N   | ASN | D | 110 | -28.827 | 26.674 | -37.168 | 1.00 | 46.90 | N |
| ATOM | 3872 | CA  | ASN | D | 110 | -27.873 | 25.563 | -37.335 | 1.00 | 46.59 | C |
| ATOM | 3873 | C   | ASN | D | 110 | -27.386 | 25.121 | -35.943 | 1.00 | 52.85 | C |
| ATOM | 3874 | O   | ASN | D | 110 | -27.235 | 23.917 | -35.686 | 1.00 | 57.60 | O |
| ATOM | 3875 | CB  | ASN | D | 110 | -26.803 | 25.916 | -38.362 | 1.00 | 43.72 | C |
| ATOM | 3876 | CG  | ASN | D | 110 | -25.662 | 24.923 | -38.456 | 1.00 | 51.27 | C |
| ATOM | 3877 | ND2 | ASN | D | 110 | -25.144 | 24.694 | -39.655 | 1.00 | 45.71 | N |
| ATOM | 3878 | OD1 | ASN | D | 110 | -25.175 | 24.435 | -37.443 | 1.00 | 55.33 | O |
| ATOM | 3879 | N   | MET | D | 111 | -27.223 | 26.074 | -35.016 | 1.00 | 50.23 | N |
| ATOM | 3880 | CA  | MET | D | 111 | -26.669 | 25.767 | -33.689 | 1.00 | 51.32 | C |
| ATOM | 3881 | C   | MET | D | 111 | -27.715 | 25.011 | -32.841 | 1.00 | 52.17 | C |
| ATOM | 3882 | O   | MET | D | 111 | -27.419 | 23.987 | -32.208 | 1.00 | 46.95 | O |
| ATOM | 3883 | CB  | MET | D | 111 | -26.217 | 27.048 | -32.971 | 1.00 | 52.24 | C |
| ATOM | 3884 | CG  | MET | D | 111 | -24.823 | 27.568 | -33.399 | 1.00 | 50.77 | C |
| ATOM | 3885 | SD  | MET | D | 111 | -24.423 | 29.222 | -32.680 | 1.00 | 49.35 | S |
| ATOM | 3886 | CE  | MET | D | 111 | -23.165 | 29.767 | -33.836 | 1.00 | 45.48 | C |
| ATOM | 3887 | N   | ALA | D | 112 | -28.953 | 25.508 | -32.860 | 1.00 | 53.93 | N |
| ATOM | 3888 | CA  | ALA | D | 112 | -30.038 | 24.963 | -32.077 | 1.00 | 53.83 | C |
| ATOM | 3889 | C   | ALA | D | 112 | -30.328 | 23.526 | -32.522 | 1.00 | 58.34 | C |
| ATOM | 3890 | O   | ALA | D | 112 | -30.577 | 22.656 | -31.671 | 1.00 | 61.97 | O |
| ATOM | 3891 | CB  | ALA | D | 112 | -31.255 | 25.857 | -32.181 | 1.00 | 55.05 | C |
| ATOM | 3892 | N   | THR | D | 113 | -30.269 | 23.280 | -33.837 | 1.00 | 55.62 | N |
| ATOM | 3893 | CA  | THR | D | 113 | -30.410 | 21.936 | -34.389 | 1.00 | 55.07 | C |
| ATOM | 3894 | C   | THR | D | 113 | -29.390 | 21.026 | -33.704 | 1.00 | 53.88 | C |
| ATOM | 3895 | O   | THR | D | 113 | -29.770 | 20.017 | -33.091 | 1.00 | 57.77 | O |
| ATOM | 3896 | CB  | THR | D | 113 | -30.268 | 21.936 | -35.919 | 1.00 | 59.08 | C |
| ATOM | 3897 | CG2 | THR | D | 113 | -30.287 | 20.556 | -36.539 | 1.00 | 50.71 | C |
| ATOM | 3898 | OG1 | THR | D | 113 | -31.354 | 22.714 | -36.425 | 1.00 | 62.35 | O |
| ATOM | 3899 | N   | ARG | D | 114 | -28.111 | 21.429 | -33.767 | 1.00 | 53.85 | N |
| ATOM | 3900 | CA  | ARG | D | 114 | -26.967 | 20.624 | -33.252 | 1.00 | 49.13 | C |

|      |      |     |     |   |     |         |        |         |      |       |     |
|------|------|-----|-----|---|-----|---------|--------|---------|------|-------|-----|
| ATOM | 3901 | C   | ARG | D | 114 | -27.159 | 20.330 | -31.749 | 1.00 | 50.60 | C   |
| ATOM | 3902 | O   | ARG | D | 114 | -26.779 | 19.265 | -31.275 | 1.00 | 50.48 | O   |
| ATOM | 3903 | CB  | ARG | D | 114 | -25.646 | 21.336 | -33.580 | 1.00 | 46.28 | C   |
| ATOM | 3904 | CG  | ARG | D | 114 | -25.347 | 21.429 | -35.072 | 1.00 | 51.30 | C   |
| ATOM | 3905 | CD  | ARG | D | 114 | -24.230 | 22.379 | -35.512 | 1.00 | 50.65 | C   |
| ATOM | 3906 | NE  | ARG | D | 114 | -22.953 | 21.731 | -35.813 | 1.00 | 49.74 | N   |
| ATOM | 3907 | CZ  | ARG | D | 114 | -22.246 | 21.887 | -36.941 | 1.00 | 55.00 | C   |
| ATOM | 3908 | NH1 | ARG | D | 114 | -22.688 | 22.669 | -37.914 | 1.00 | 53.04 | N1+ |
| ATOM | 3909 | NH2 | ARG | D | 114 | -21.075 | 21.283 | -37.080 | 1.00 | 50.68 | N   |
| ATOM | 3910 | N   | TYR | D | 115 | -27.784 | 21.254 | -31.004 | 1.00 | 51.94 | N   |
| ATOM | 3911 | CA  | TYR | D | 115 | -27.973 | 21.093 | -29.545 | 1.00 | 57.17 | C   |
| ATOM | 3912 | C   | TYR | D | 115 | -29.191 | 20.200 | -29.248 | 1.00 | 59.58 | C   |
| ATOM | 3913 | O   | TYR | D | 115 | -29.460 | 19.924 | -28.075 | 1.00 | 54.58 | O   |
| ATOM | 3914 | CB  | TYR | D | 115 | -28.026 | 22.457 | -28.824 | 1.00 | 53.65 | C   |
| ATOM | 3915 | CG  | TYR | D | 115 | -26.692 | 23.169 | -28.714 | 1.00 | 51.94 | C   |
| ATOM | 3916 | CD1 | TYR | D | 115 | -25.556 | 22.493 | -28.306 | 1.00 | 52.53 | C   |
| ATOM | 3917 | CD2 | TYR | D | 115 | -26.552 | 24.512 | -29.040 | 1.00 | 51.39 | C   |
| ATOM | 3918 | CE1 | TYR | D | 115 | -24.321 | 23.114 | -28.244 | 1.00 | 55.37 | C   |
| ATOM | 3919 | CE2 | TYR | D | 115 | -25.327 | 25.152 | -28.978 | 1.00 | 50.18 | C   |
| ATOM | 3920 | CZ  | TYR | D | 115 | -24.202 | 24.452 | -28.575 | 1.00 | 56.86 | C   |
| ATOM | 3921 | OH  | TYR | D | 115 | -22.973 | 25.050 | -28.492 | 1.00 | 55.06 | O   |
| ATOM | 3922 | N   | GLY | D | 116 | -29.908 | 19.753 | -30.293 | 1.00 | 63.10 | N   |
| ATOM | 3923 | CA  | GLY | D | 116 | -30.976 | 18.728 | -30.185 | 1.00 | 62.90 | C   |
| ATOM | 3924 | C   | GLY | D | 116 | -32.354 | 19.307 | -29.876 | 1.00 | 61.49 | C   |
| ATOM | 3925 | O   | GLY | D | 116 | -33.239 | 18.605 | -29.379 | 1.00 | 63.15 | O   |
| ATOM | 3926 | N   | ALA | D | 117 | -32.543 | 20.589 | -30.191 | 1.00 | 61.46 | N   |
| ATOM | 3927 | CA  | ALA | D | 117 | -33.751 | 21.327 | -29.867 | 1.00 | 60.44 | C   |
| ATOM | 3928 | C   | ALA | D | 117 | -34.759 | 21.168 | -31.001 | 1.00 | 59.11 | C   |
| ATOM | 3929 | O   | ALA | D | 117 | -34.411 | 20.741 | -32.089 | 1.00 | 63.66 | O   |
| ATOM | 3930 | CB  | ALA | D | 117 | -33.427 | 22.791 | -29.645 | 1.00 | 62.37 | C   |
| ATOM | 3931 | N   | ASP | D | 118 | -35.996 | 21.569 | -30.708 | 1.00 | 60.88 | N   |
| ATOM | 3932 | CA  | ASP | D | 118 | -37.096 | 21.573 | -31.634 | 1.00 | 57.74 | C   |
| ATOM | 3933 | C   | ASP | D | 118 | -37.202 | 23.012 | -32.142 | 1.00 | 59.49 | C   |

|      |      |     |     |   |     |         |        |         |      |       |     |
|------|------|-----|-----|---|-----|---------|--------|---------|------|-------|-----|
| ATOM | 3934 | O   | ASP | D | 118 | -37.682 | 23.903 | -31.421 | 1.00 | 56.98 | O   |
| ATOM | 3935 | CB  | ASP | D | 118 | -38.358 | 21.011 | -30.955 | 1.00 | 60.54 | C   |
| ATOM | 3936 | CG  | ASP | D | 118 | -39.589 | 20.846 | -31.837 | 1.00 | 62.18 | C   |
| ATOM | 3937 | OD1 | ASP | D | 118 | -39.529 | 21.192 | -33.031 | 1.00 | 66.67 | O   |
| ATOM | 3938 | OD2 | ASP | D | 118 | -40.621 | 20.392 | -31.308 | 1.00 | 64.55 | O1- |
| ATOM | 3939 | N   | VAL | D | 119 | -36.723 | 23.208 | -33.377 | 1.00 | 58.44 | N   |
| ATOM | 3940 | CA  | VAL | D | 119 | -36.560 | 24.503 | -34.007 | 1.00 | 62.99 | C   |
| ATOM | 3941 | C   | VAL | D | 119 | -37.836 | 24.878 | -34.783 | 1.00 | 70.06 | C   |
| ATOM | 3942 | O   | VAL | D | 119 | -38.310 | 24.101 | -35.604 | 1.00 | 76.00 | O   |
| ATOM | 3943 | CB  | VAL | D | 119 | -35.335 | 24.485 | -34.942 | 1.00 | 60.50 | C   |
| ATOM | 3944 | CG1 | VAL | D | 119 | -35.150 | 25.811 | -35.664 | 1.00 | 57.45 | C   |
| ATOM | 3945 | CG2 | VAL | D | 119 | -34.067 | 24.100 | -34.196 | 1.00 | 63.86 | C   |
| ATOM | 3946 | N   | ARG | D | 120 | -38.334 | 26.099 | -34.548 | 1.00 | 68.46 | N   |
| ATOM | 3947 | CA  | ARG | D | 120 | -39.508 | 26.658 | -35.212 | 1.00 | 67.90 | C   |
| ATOM | 3948 | C   | ARG | D | 120 | -39.197 | 28.093 | -35.661 | 1.00 | 68.73 | C   |
| ATOM | 3949 | O   | ARG | D | 120 | -38.592 | 28.854 | -34.939 | 1.00 | 76.64 | O   |
| ATOM | 3950 | CB  | ARG | D | 120 | -40.709 | 26.678 | -34.264 | 1.00 | 66.91 | C   |
| ATOM | 3951 | CG  | ARG | D | 120 | -40.978 | 25.363 | -33.545 | 1.00 | 68.05 | C   |
| ATOM | 3952 | CD  | ARG | D | 120 | -41.570 | 24.245 | -34.394 | 1.00 | 62.57 | C   |
| ATOM | 3953 | NE  | ARG | D | 120 | -41.797 | 23.087 | -33.541 | 1.00 | 62.43 | N   |
| ATOM | 3954 | CZ  | ARG | D | 120 | -42.773 | 22.992 | -32.650 | 1.00 | 59.06 | C   |
| ATOM | 3955 | NH1 | ARG | D | 120 | -43.719 | 23.916 | -32.632 | 1.00 | 53.92 | N1+ |
| ATOM | 3956 | NH2 | ARG | D | 120 | -42.807 | 21.974 | -31.796 | 1.00 | 55.13 | N   |
| ATOM | 3957 | N   | VAL | D | 121 | -39.652 | 28.460 | -36.856 | 1.00 | 65.80 | N   |
| ATOM | 3958 | CA  | VAL | D | 121 | -39.122 | 29.600 | -37.546 | 1.00 | 65.31 | C   |
| ATOM | 3959 | C   | VAL | D | 121 | -40.259 | 30.579 | -37.862 | 1.00 | 67.95 | C   |
| ATOM | 3960 | O   | VAL | D | 121 | -41.435 | 30.236 | -37.825 | 1.00 | 78.14 | O   |
| ATOM | 3961 | CB  | VAL | D | 121 | -38.348 | 29.150 | -38.799 | 1.00 | 68.00 | C   |
| ATOM | 3962 | CG1 | VAL | D | 121 | -37.757 | 30.321 | -39.570 | 1.00 | 71.51 | C   |
| ATOM | 3963 | CG2 | VAL | D | 121 | -37.256 | 28.149 | -38.450 | 1.00 | 63.51 | C   |
| ATOM | 3964 | N   | LEU | D | 122 | -39.865 | 31.832 | -38.091 | 1.00 | 67.10 | N   |
| ATOM | 3965 | CA  | LEU | D | 122 | -40.727 | 32.907 | -38.499 | 1.00 | 64.20 | C   |
| ATOM | 3966 | C   | LEU | D | 122 | -40.003 | 33.660 | -39.618 | 1.00 | 60.69 | C   |

|      |      |     |     |   |     |         |        |         |      |       |     |
|------|------|-----|-----|---|-----|---------|--------|---------|------|-------|-----|
| ATOM | 3967 | O   | LEU | D | 122 | -39.162 | 34.481 | -39.338 | 1.00 | 74.58 | O   |
| ATOM | 3968 | CB  | LEU | D | 122 | -40.996 | 33.776 | -37.264 | 1.00 | 65.56 | C   |
| ATOM | 3969 | CG  | LEU | D | 122 | -41.633 | 35.147 | -37.493 | 1.00 | 70.59 | C   |
| ATOM | 3970 | CD1 | LEU | D | 122 | -42.877 | 35.058 | -38.362 | 1.00 | 75.71 | C   |
| ATOM | 3971 | CD2 | LEU | D | 122 | -41.985 | 35.806 | -36.166 | 1.00 | 74.43 | C   |
| ATOM | 3972 | N   | GLU | D | 123 | -40.297 | 33.322 | -40.878 | 1.00 | 59.19 | N   |
| ATOM | 3973 | CA  | GLU | D | 123 | -39.536 | 33.829 | -42.028 | 1.00 | 60.90 | C   |
| ATOM | 3974 | C   | GLU | D | 123 | -39.981 | 35.259 | -42.331 | 1.00 | 58.31 | C   |
| ATOM | 3975 | O   | GLU | D | 123 | -41.069 | 35.659 | -41.981 | 1.00 | 65.50 | O   |
| ATOM | 3976 | CB  | GLU | D | 123 | -39.708 | 32.936 | -43.260 | 1.00 | 67.04 | C   |
| ATOM | 3977 | CG  | GLU | D | 123 | -39.468 | 31.455 | -42.984 | 1.00 | 70.51 | C   |
| ATOM | 3978 | CD  | GLU | D | 123 | -38.628 | 30.735 | -44.022 | 1.00 | 73.52 | C   |
| ATOM | 3979 | OE1 | GLU | D | 123 | -38.506 | 31.254 | -45.149 | 1.00 | 74.58 | O   |
| ATOM | 3980 | OE2 | GLU | D | 123 | -38.074 | 29.670 | -43.690 | 1.00 | 73.57 | O1- |
| ATOM | 3981 | N   | GLY | D | 124 | -39.102 | 36.030 | -42.973 | 1.00 | 62.32 | N   |
| ATOM | 3982 | CA  | GLY | D | 124 | -39.370 | 37.420 | -43.317 | 1.00 | 54.91 | C   |
| ATOM | 3983 | C   | GLY | D | 124 | -38.466 | 37.891 | -44.449 | 1.00 | 54.33 | C   |
| ATOM | 3984 | O   | GLY | D | 124 | -37.421 | 37.290 | -44.717 | 1.00 | 46.03 | O   |
| ATOM | 3985 | N   | PRO | D | 125 | -38.847 | 38.976 | -45.158 | 1.00 | 59.38 | N   |
| ATOM | 3986 | CA  | PRO | D | 125 | -37.921 | 39.654 | -46.066 | 1.00 | 64.43 | C   |
| ATOM | 3987 | C   | PRO | D | 125 | -36.809 | 40.330 | -45.240 | 1.00 | 73.71 | C   |
| ATOM | 3988 | O   | PRO | D | 125 | -37.083 | 40.886 | -44.173 | 1.00 | 84.78 | O   |
| ATOM | 3989 | CB  | PRO | D | 125 | -38.809 | 40.681 | -46.781 | 1.00 | 62.09 | C   |
| ATOM | 3990 | CG  | PRO | D | 125 | -39.918 | 40.963 | -45.780 | 1.00 | 61.92 | C   |
| ATOM | 3991 | CD  | PRO | D | 125 | -40.160 | 39.639 | -45.079 | 1.00 | 60.49 | C   |
| ATOM | 3992 | N   | ALA | D | 126 | -35.569 | 40.291 | -45.735 | 1.00 | 68.26 | N   |
| ATOM | 3993 | CA  | ALA | D | 126 | -34.404 | 40.779 | -44.996 | 1.00 | 64.52 | C   |
| ATOM | 3994 | C   | ALA | D | 126 | -34.384 | 42.313 | -44.899 | 1.00 | 69.51 | C   |
| ATOM | 3995 | O   | ALA | D | 126 | -33.474 | 42.868 | -44.232 | 1.00 | 61.16 | O   |
| ATOM | 3996 | CB  | ALA | D | 126 | -33.142 | 40.288 | -45.661 | 1.00 | 68.44 | C   |
| ATOM | 3997 | N   | ASP | D | 127 | -35.356 | 42.987 | -45.549 | 1.00 | 67.63 | N   |
| ATOM | 3998 | CA  | ASP | D | 127 | -35.328 | 44.450 | -45.743 | 1.00 | 64.47 | C   |
| ATOM | 3999 | C   | ASP | D | 127 | -36.514 | 45.123 | -45.030 | 1.00 | 63.17 | C   |

|      |      |     |     |   |     |         |        |         |      |       |     |
|------|------|-----|-----|---|-----|---------|--------|---------|------|-------|-----|
| ATOM | 4000 | O   | ASP | D | 127 | -36.742 | 46.328 | -45.212 | 1.00 | 58.30 | O   |
| ATOM | 4001 | CB  | ASP | D | 127 | -35.196 | 44.791 | -47.238 | 1.00 | 64.98 | C   |
| ATOM | 4002 | CG  | ASP | D | 127 | -36.452 | 44.681 | -48.094 | 1.00 | 59.91 | C   |
| ATOM | 4003 | OD1 | ASP | D | 127 | -37.418 | 43.981 | -47.681 | 1.00 | 47.71 | O   |
| ATOM | 4004 | OD2 | ASP | D | 127 | -36.430 | 45.298 | -49.189 | 1.00 | 60.28 | O1- |
| ATOM | 4005 | N   | LYS | D | 128 | -37.223 | 44.349 | -44.192 | 1.00 | 62.68 | N   |
| ATOM | 4006 | CA  | LYS | D | 128 | -38.261 | 44.845 | -43.306 | 1.00 | 60.15 | C   |
| ATOM | 4007 | C   | LYS | D | 128 | -38.174 | 44.110 | -41.972 | 1.00 | 60.68 | C   |
| ATOM | 4008 | O   | LYS | D | 128 | -37.784 | 42.950 | -41.924 | 1.00 | 56.52 | O   |
| ATOM | 4009 | CB  | LYS | D | 128 | -39.635 | 44.648 | -43.950 | 1.00 | 68.93 | C   |
| ATOM | 4010 | CG  | LYS | D | 128 | -40.075 | 45.798 | -44.848 | 1.00 | 83.57 | C   |
| ATOM | 4011 | CD  | LYS | D | 128 | -41.087 | 45.417 | -45.912 | 1.00 | 90.77 | C   |
| ATOM | 4012 | CE  | LYS | D | 128 | -41.663 | 46.625 | -46.626 | 1.00 | 93.81 | C   |
| ATOM | 4013 | NZ  | LYS | D | 128 | -42.180 | 46.264 | -47.967 | 1.00 | 99.06 | N1+ |
| ATOM | 4014 | N   | PRO | D | 129 | -38.544 | 44.750 | -40.841 | 1.00 | 63.38 | N   |
| ATOM | 4015 | CA  | PRO | D | 129 | -38.556 | 44.077 | -39.539 | 1.00 | 62.92 | C   |
| ATOM | 4016 | C   | PRO | D | 129 | -39.788 | 43.184 | -39.375 | 1.00 | 60.19 | C   |
| ATOM | 4017 | O   | PRO | D | 129 | -40.621 | 43.160 | -40.245 | 1.00 | 68.06 | O   |
| ATOM | 4018 | CB  | PRO | D | 129 | -38.660 | 45.255 | -38.558 | 1.00 | 61.33 | C   |
| ATOM | 4019 | CG  | PRO | D | 129 | -39.510 | 46.258 | -39.315 | 1.00 | 63.24 | C   |
| ATOM | 4020 | CD  | PRO | D | 129 | -39.007 | 46.145 | -40.746 | 1.00 | 63.53 | C   |
| ATOM | 4021 | N   | PHE | D | 130 | -39.885 | 42.507 | -38.233 | 1.00 | 63.14 | N   |
| ATOM | 4022 | CA  | PHE | D | 130 | -41.104 | 41.851 | -37.783 | 1.00 | 68.31 | C   |
| ATOM | 4023 | C   | PHE | D | 130 | -41.926 | 42.856 | -36.967 | 1.00 | 70.11 | C   |
| ATOM | 4024 | O   | PHE | D | 130 | -41.351 | 43.732 | -36.331 | 1.00 | 73.98 | O   |
| ATOM | 4025 | CB  | PHE | D | 130 | -40.749 | 40.580 | -37.000 | 1.00 | 70.75 | C   |
| ATOM | 4026 | CG  | PHE | D | 130 | -39.935 | 39.592 | -37.798 | 1.00 | 69.79 | C   |
| ATOM | 4027 | CD1 | PHE | D | 130 | -40.550 | 38.738 | -38.704 | 1.00 | 64.35 | C   |
| ATOM | 4028 | CD2 | PHE | D | 130 | -38.552 | 39.561 | -37.694 | 1.00 | 69.34 | C   |
| ATOM | 4029 | CE1 | PHE | D | 130 | -39.803 | 37.854 | -39.463 | 1.00 | 61.91 | C   |
| ATOM | 4030 | CE2 | PHE | D | 130 | -37.802 | 38.680 | -38.457 | 1.00 | 69.53 | C   |
| ATOM | 4031 | CZ  | PHE | D | 130 | -38.431 | 37.827 | -39.340 | 1.00 | 71.45 | C   |
| ATOM | 4032 | N   | SER | D | 131 | -43.261 | 42.734 | -37.019 | 1.00 | 74.69 | N   |



|      |      |     |     |   |     |         |        |         |      |       |     |
|------|------|-----|-----|---|-----|---------|--------|---------|------|-------|-----|
| ATOM | 4033 | CA  | SER | D | 131 | -44.191 | 43.555 | -36.221 | 1.00 | 77.80 | C   |
| ATOM | 4034 | C   | SER | D | 131 | -44.517 | 42.797 | -34.933 | 1.00 | 74.58 | C   |
| ATOM | 4035 | O   | SER | D | 131 | -44.297 | 41.588 | -34.876 | 1.00 | 81.94 | O   |
| ATOM | 4036 | CB  | SER | D | 131 | -45.441 | 43.880 | -36.999 | 1.00 | 83.18 | C   |
| ATOM | 4037 | OG  | SER | D | 131 | -46.174 | 42.697 | -37.293 | 1.00 | 90.31 | O   |
| ATOM | 4038 | N   | MET | D | 132 | -45.039 | 43.486 | -33.911 | 1.00 | 68.51 | N   |
| ATOM | 4039 | CA  | MET | D | 132 | -45.341 | 42.780 | -32.650 | 1.00 | 70.85 | C   |
| ATOM | 4040 | C   | MET | D | 132 | -46.471 | 41.777 | -32.904 | 1.00 | 72.34 | C   |
| ATOM | 4041 | O   | MET | D | 132 | -46.564 | 40.788 | -32.171 | 1.00 | 71.90 | O   |
| ATOM | 4042 | CB  | MET | D | 132 | -45.733 | 43.696 | -31.480 | 1.00 | 70.14 | C   |
| ATOM | 4043 | CG  | MET | D | 132 | -44.551 | 44.336 | -30.698 | 1.00 | 82.85 | C   |
| ATOM | 4044 | SD  | MET | D | 132 | -42.951 | 43.412 | -30.538 | 1.00 | 87.51 | S   |
| ATOM | 4045 | CE  | MET | D | 132 | -41.999 | 44.108 | -31.893 | 1.00 | 76.51 | C   |
| ATOM | 4046 | N   | THR | D | 133 | -47.300 | 42.026 | -33.931 | 1.00 | 64.77 | N   |
| ATOM | 4047 | CA  | THR | D | 133 | -48.387 | 41.119 | -34.247 | 1.00 | 69.62 | C   |
| ATOM | 4048 | C   | THR | D | 133 | -47.777 | 39.790 | -34.715 | 1.00 | 73.68 | C   |
| ATOM | 4049 | O   | THR | D | 133 | -48.097 | 38.714 | -34.155 | 1.00 | 66.38 | O   |
| ATOM | 4050 | CB  | THR | D | 133 | -49.375 | 41.739 | -35.246 | 1.00 | 74.04 | C   |
| ATOM | 4051 | CG2 | THR | D | 133 | -50.561 | 40.854 | -35.565 | 1.00 | 70.77 | C   |
| ATOM | 4052 | OG1 | THR | D | 133 | -49.873 | 42.949 | -34.685 | 1.00 | 66.63 | O   |
| ATOM | 4053 | N   | ASP | D | 134 | -46.871 | 39.870 | -35.701 | 1.00 | 67.41 | N   |
| ATOM | 4054 | CA  | ASP | D | 134 | -46.140 | 38.689 | -36.210 | 1.00 | 66.80 | C   |
| ATOM | 4055 | C   | ASP | D | 134 | -45.524 | 37.894 | -35.043 | 1.00 | 68.34 | C   |
| ATOM | 4056 | O   | ASP | D | 134 | -45.511 | 36.653 | -35.060 | 1.00 | 64.82 | O   |
| ATOM | 4057 | CB  | ASP | D | 134 | -45.044 | 39.085 | -37.201 | 1.00 | 64.71 | C   |
| ATOM | 4058 | CG  | ASP | D | 134 | -45.567 | 39.845 | -38.399 | 1.00 | 70.51 | C   |
| ATOM | 4059 | OD1 | ASP | D | 134 | -46.723 | 39.591 | -38.778 | 1.00 | 72.58 | O   |
| ATOM | 4060 | OD2 | ASP | D | 134 | -44.819 | 40.697 | -38.925 | 1.00 | 74.04 | O1- |
| ATOM | 4061 | N   | PHE | D | 135 | -45.003 | 38.615 | -34.041 | 1.00 | 67.17 | N   |
| ATOM | 4062 | CA  | PHE | D | 135 | -44.369 | 37.988 | -32.875 | 1.00 | 70.12 | C   |
| ATOM | 4063 | C   | PHE | D | 135 | -45.424 | 37.294 | -31.983 | 1.00 | 71.41 | C   |
| ATOM | 4064 | O   | PHE | D | 135 | -45.233 | 36.129 | -31.595 | 1.00 | 62.32 | O   |
| ATOM | 4065 | CB  | PHE | D | 135 | -43.517 | 39.009 | -32.106 | 1.00 | 70.06 | C   |

|      |      |     |     |   |     |         |        |         |      |       |     |
|------|------|-----|-----|---|-----|---------|--------|---------|------|-------|-----|
| ATOM | 4066 | CG  | PHE | D | 135 | -42.131 | 39.288 | -32.655 | 1.00 | 63.23 | C   |
| ATOM | 4067 | CD1 | PHE | D | 135 | -41.246 | 38.257 | -32.921 | 1.00 | 59.30 | C   |
| ATOM | 4068 | CD2 | PHE | D | 135 | -41.690 | 40.590 | -32.838 | 1.00 | 58.93 | C   |
| ATOM | 4069 | CE1 | PHE | D | 135 | -39.977 | 38.517 | -33.407 | 1.00 | 58.40 | C   |
| ATOM | 4070 | CE2 | PHE | D | 135 | -40.423 | 40.852 | -33.325 | 1.00 | 57.19 | C   |
| ATOM | 4071 | CZ  | PHE | D | 135 | -39.566 | 39.814 | -33.603 | 1.00 | 62.20 | C   |
| ATOM | 4072 | N   | LYS | D | 136 | -46.532 | 37.976 | -31.645 | 1.00 | 68.88 | N   |
| ATOM | 4073 | CA  | LYS | D | 136 | -47.552 | 37.359 | -30.766 | 1.00 | 70.83 | C   |
| ATOM | 4074 | C   | LYS | D | 136 | -48.074 | 36.062 | -31.399 | 1.00 | 76.53 | C   |
| ATOM | 4075 | O   | LYS | D | 136 | -48.207 | 35.054 | -30.710 | 1.00 | 77.95 | O   |
| ATOM | 4076 | CB  | LYS | D | 136 | -48.732 | 38.293 | -30.487 | 1.00 | 73.79 | C   |
| ATOM | 4077 | CG  | LYS | D | 136 | -48.376 | 39.601 | -29.797 | 1.00 | 87.02 | C   |
| ATOM | 4078 | CD  | LYS | D | 136 | -49.475 | 40.656 | -29.818 | 1.00 | 89.96 | C   |
| ATOM | 4079 | CE  | LYS | D | 136 | -50.092 | 40.907 | -28.456 | 1.00 | 86.18 | C   |
| ATOM | 4080 | NZ  | LYS | D | 136 | -50.589 | 42.297 | -28.349 | 1.00 | 84.70 | N1+ |
| ATOM | 4081 | N   | LYS | D | 137 | -48.356 | 36.103 | -32.712 | 1.00 | 80.89 | N   |
| ATOM | 4082 | CA  | LYS | D | 137 | -48.949 | 34.972 | -33.453 | 1.00 | 80.64 | C   |
| ATOM | 4083 | C   | LYS | D | 137 | -48.025 | 33.750 | -33.384 | 1.00 | 70.20 | C   |
| ATOM | 4084 | O   | LYS | D | 137 | -48.418 | 32.716 | -32.865 | 1.00 | 68.28 | O   |
| ATOM | 4085 | CB  | LYS | D | 137 | -49.260 | 35.362 | -34.902 | 1.00 | 89.92 | C   |
| ATOM | 4086 | CG  | LYS | D | 137 | -50.652 | 35.946 | -35.134 | 1.00 | 93.95 | C   |
| ATOM | 4087 | CD  | LYS | D | 137 | -50.965 | 36.196 | -36.607 | 1.00 | 99.15 | C   |
| ATOM | 4088 | CE  | LYS | D | 137 | -50.335 | 37.461 | -37.157 | 1.00 | 98.44 | C   |
| ATOM | 4089 | NZ  | LYS | D | 137 | -50.393 | 37.514 | -38.638 | 1.00 | 93.79 | N1+ |
| ATOM | 4090 | N   | ALA | D | 138 | -46.787 | 33.901 | -33.860 | 1.00 | 71.76 | N   |
| ATOM | 4091 | CA  | ALA | D | 138 | -45.756 | 32.826 | -33.833 | 1.00 | 71.73 | C   |
| ATOM | 4092 | C   | ALA | D | 138 | -45.644 | 32.140 | -32.453 | 1.00 | 66.09 | C   |
| ATOM | 4093 | O   | ALA | D | 138 | -45.449 | 30.930 | -32.353 | 1.00 | 57.61 | O   |
| ATOM | 4094 | CB  | ALA | D | 138 | -44.439 | 33.426 | -34.244 | 1.00 | 71.11 | C   |
| ATOM | 4095 | N   | ILE | D | 139 | -45.750 | 32.933 | -31.382 | 1.00 | 73.05 | N   |
| ATOM | 4096 | CA  | ILE | D | 139 | -45.561 | 32.470 | -30.005 | 1.00 | 73.75 | C   |
| ATOM | 4097 | C   | ILE | D | 139 | -46.784 | 31.637 | -29.586 | 1.00 | 76.42 | C   |
| ATOM | 4098 | O   | ILE | D | 139 | -46.637 | 30.583 | -28.943 | 1.00 | 69.52 | O   |

|      |      |     |     |   |     |         |        |         |      |        |     |
|------|------|-----|-----|---|-----|---------|--------|---------|------|--------|-----|
| ATOM | 4099 | CB  | ILE | D | 139 | -45.294 | 33.668 | -29.052 | 1.00 | 70.46  | C   |
| ATOM | 4100 | CG1 | ILE | D | 139 | -44.050 | 34.468 | -29.459 | 1.00 | 70.72  | C   |
| ATOM | 4101 | CG2 | ILE | D | 139 | -45.200 | 33.210 | -27.600 | 1.00 | 66.42  | C   |
| ATOM | 4102 | CD1 | ILE | D | 139 | -43.938 | 35.838 | -28.800 | 1.00 | 71.05  | C   |
| ATOM | 4103 | N   | GLU | D | 140 | -47.983 | 32.126 | -29.947 | 1.00 | 89.91  | N   |
| ATOM | 4104 | CA  | GLU | D | 140 | -49.286 | 31.469 | -29.648 | 1.00 | 86.93  | C   |
| ATOM | 4105 | C   | GLU | D | 140 | -49.358 | 30.084 | -30.314 | 1.00 | 81.46  | C   |
| ATOM | 4106 | O   | GLU | D | 140 | -49.874 | 29.148 | -29.697 | 1.00 | 76.41  | O   |
| ATOM | 4107 | CB  | GLU | D | 140 | -50.443 | 32.356 | -30.119 | 1.00 | 90.11  | C   |
| ATOM | 4108 | CG  | GLU | D | 140 | -51.823 | 31.729 | -29.949 | 1.00 | 90.35  | C   |
| ATOM | 4109 | CD  | GLU | D | 140 | -52.398 | 31.842 | -28.549 | 1.00 | 89.07  | C   |
| ATOM | 4110 | OE1 | GLU | D | 140 | -52.922 | 30.824 | -28.036 | 1.00 | 74.63  | O   |
| ATOM | 4111 | OE2 | GLU | D | 140 | -52.327 | 32.955 | -27.979 | 1.00 | 84.34  | O1- |
| ATOM | 4112 | N   | GLN | D | 141 | -48.822 | 29.977 | -31.546 | 1.00 | 71.03  | N   |
| ATOM | 4113 | CA  | GLN | D | 141 | -48.825 | 28.739 | -32.353 | 1.00 | 74.15  | C   |
| ATOM | 4114 | C   | GLN | D | 141 | -47.884 | 27.682 | -31.743 | 1.00 | 78.90  | C   |
| ATOM | 4115 | O   | GLN | D | 141 | -48.220 | 26.471 | -31.679 | 1.00 | 62.05  | O   |
| ATOM | 4116 | CB  | GLN | D | 141 | -48.398 | 29.010 | -33.803 | 1.00 | 81.01  | C   |
| ATOM | 4117 | CG  | GLN | D | 141 | -48.748 | 30.404 | -34.319 | 1.00 | 92.39  | C   |
| ATOM | 4118 | CD  | GLN | D | 141 | -48.909 | 30.507 | -35.818 | 1.00 | 99.64  | C   |
| ATOM | 4119 | NE2 | GLN | D | 141 | -49.807 | 31.383 | -36.253 | 1.00 | 95.35  | N   |
| ATOM | 4120 | OE1 | GLN | D | 141 | -48.227 | 29.825 | -36.582 | 1.00 | 105.91 | O   |
| ATOM | 4121 | N   | HIS | D | 142 | -46.692 | 28.129 | -31.311 | 1.00 | 80.55  | N   |
| ATOM | 4122 | CA  | HIS | D | 142 | -45.562 | 27.228 | -31.070 | 1.00 | 73.18  | C   |
| ATOM | 4123 | C   | HIS | D | 142 | -45.310 | 26.985 | -29.569 | 1.00 | 68.52  | C   |
| ATOM | 4124 | O   | HIS | D | 142 | -44.681 | 25.992 | -29.207 | 1.00 | 71.86  | O   |
| ATOM | 4125 | CB  | HIS | D | 142 | -44.346 | 27.763 | -31.823 | 1.00 | 69.96  | C   |
| ATOM | 4126 | CG  | HIS | D | 142 | -44.418 | 27.649 | -33.314 | 1.00 | 69.48  | C   |
| ATOM | 4127 | CD2 | HIS | D | 142 | -44.133 | 26.620 | -34.142 | 1.00 | 58.67  | C   |
| ATOM | 4128 | ND1 | HIS | D | 142 | -44.731 | 28.732 | -34.136 | 1.00 | 79.14  | N   |
| ATOM | 4129 | CE1 | HIS | D | 142 | -44.642 | 28.363 | -35.405 | 1.00 | 70.08  | C   |
| ATOM | 4130 | NE2 | HIS | D | 142 | -44.271 | 27.067 | -35.431 | 1.00 | 57.38  | N   |
| ATOM | 4131 | N   | ARG | D | 143 | -45.816 | 27.872 | -28.704 | 1.00 | 74.76  | N   |

|      |      |     |     |   |     |         |        |         |      |        |     |
|------|------|-----|-----|---|-----|---------|--------|---------|------|--------|-----|
| ATOM | 4132 | CA  | ARG | D | 143 | -45.637 | 27.819 | -27.234 | 1.00 | 77.46  | C   |
| ATOM | 4133 | C   | ARG | D | 143 | -44.182 | 27.508 | -26.848 | 1.00 | 69.46  | C   |
| ATOM | 4134 | O   | ARG | D | 143 | -43.910 | 26.662 | -25.994 | 1.00 | 59.70  | O   |
| ATOM | 4135 | CB  | ARG | D | 143 | -46.659 | 26.842 | -26.647 | 1.00 | 85.84  | C   |
| ATOM | 4136 | CG  | ARG | D | 143 | -48.095 | 27.353 | -26.708 | 1.00 | 98.26  | C   |
| ATOM | 4137 | CD  | ARG | D | 143 | -49.052 | 26.370 | -26.054 | 1.00 | 120.13 | C   |
| ATOM | 4138 | NE  | ARG | D | 143 | -50.453 | 26.502 | -26.465 | 1.00 | 134.26 | N   |
| ATOM | 4139 | CZ  | ARG | D | 143 | -51.405 | 25.595 | -26.215 | 1.00 | 127.51 | C   |
| ATOM | 4140 | NH1 | ARG | D | 143 | -51.167 | 24.589 | -25.390 | 1.00 | 113.48 | N1+ |
| ATOM | 4141 | NH2 | ARG | D | 143 | -52.590 | 25.687 | -26.799 | 1.00 | 118.64 | N   |
| ATOM | 4142 | N   | PRO | D | 144 | -43.184 | 28.251 | -27.385 | 1.00 | 68.78  | N   |
| ATOM | 4143 | CA  | PRO | D | 144 | -41.772 | 27.929 | -27.151 | 1.00 | 68.32  | C   |
| ATOM | 4144 | C   | PRO | D | 144 | -41.219 | 28.337 | -25.767 | 1.00 | 66.45  | C   |
| ATOM | 4145 | O   | PRO | D | 144 | -41.728 | 29.263 | -25.117 | 1.00 | 58.75  | O   |
| ATOM | 4146 | CB  | PRO | D | 144 | -41.057 | 28.743 | -28.235 | 1.00 | 62.81  | C   |
| ATOM | 4147 | CG  | PRO | D | 144 | -41.932 | 29.972 | -28.392 | 1.00 | 66.40  | C   |
| ATOM | 4148 | CD  | PRO | D | 144 | -43.351 | 29.488 | -28.168 | 1.00 | 65.26  | C   |
| ATOM | 4149 | N   | LYS | D | 145 | -40.155 | 27.633 | -25.352 | 1.00 | 65.15  | N   |
| ATOM | 4150 | CA  | LYS | D | 145 | -39.320 | 27.982 | -24.200 | 1.00 | 64.52  | C   |
| ATOM | 4151 | C   | LYS | D | 145 | -38.635 | 29.339 | -24.437 | 1.00 | 62.17  | C   |
| ATOM | 4152 | O   | LYS | D | 145 | -38.774 | 30.243 | -23.626 | 1.00 | 63.88  | O   |
| ATOM | 4153 | CB  | LYS | D | 145 | -38.266 | 26.902 | -23.938 | 1.00 | 61.49  | C   |
| ATOM | 4154 | CG  | LYS | D | 145 | -37.917 | 26.716 | -22.469 | 1.00 | 59.39  | C   |
| ATOM | 4155 | CD  | LYS | D | 145 | -36.918 | 25.620 | -22.253 | 1.00 | 58.28  | C   |
| ATOM | 4156 | CE  | LYS | D | 145 | -36.442 | 25.546 | -20.819 | 1.00 | 57.05  | C   |
| ATOM | 4157 | NZ  | LYS | D | 145 | -35.252 | 24.668 | -20.719 | 1.00 | 58.30  | N1+ |
| ATOM | 4158 | N   | CYS | D | 146 | -37.938 | 29.480 | -25.569 | 1.00 | 61.24  | N   |
| ATOM | 4159 | CA  | CYS | D | 146 | -37.186 | 30.678 | -25.868 | 1.00 | 63.63  | C   |
| ATOM | 4160 | C   | CYS | D | 146 | -37.529 | 31.200 | -27.258 | 1.00 | 59.92  | C   |
| ATOM | 4161 | O   | CYS | D | 146 | -37.678 | 30.421 | -28.183 | 1.00 | 62.54  | O   |
| ATOM | 4162 | CB  | CYS | D | 146 | -35.686 | 30.412 | -25.825 | 1.00 | 67.79  | C   |
| ATOM | 4163 | SG  | CYS | D | 146 | -35.113 | 29.716 | -24.254 | 1.00 | 69.97  | S   |
| ATOM | 4164 | N   | LEU | D | 147 | -37.579 | 32.533 | -27.365 | 1.00 | 59.33  | N   |

|      |      |     |     |   |     |         |        |         |      |       |   |
|------|------|-----|-----|---|-----|---------|--------|---------|------|-------|---|
| ATOM | 4165 | CA  | LEU | D | 147 | -37.530 | 33.268 | -28.620 | 1.00 | 56.02 | C |
| ATOM | 4166 | C   | LEU | D | 147 | -36.131 | 33.874 | -28.817 | 1.00 | 56.70 | C |
| ATOM | 4167 | O   | LEU | D | 147 | -35.577 | 34.462 | -27.892 | 1.00 | 57.79 | O |
| ATOM | 4168 | CB  | LEU | D | 147 | -38.582 | 34.374 | -28.555 | 1.00 | 52.59 | C |
| ATOM | 4169 | CG  | LEU | D | 147 | -38.530 | 35.375 | -29.700 | 1.00 | 56.06 | C |
| ATOM | 4170 | CD1 | LEU | D | 147 | -38.773 | 34.681 | -31.027 | 1.00 | 61.40 | C |
| ATOM | 4171 | CD2 | LEU | D | 147 | -39.550 | 36.480 | -29.482 | 1.00 | 60.67 | C |
| ATOM | 4172 | N   | PHE | D | 148 | -35.591 | 33.768 | -30.035 | 1.00 | 51.92 | N |
| ATOM | 4173 | CA  | PHE | D | 148 | -34.305 | 34.330 | -30.390 | 1.00 | 48.50 | C |
| ATOM | 4174 | C   | PHE | D | 148 | -34.464 | 35.399 | -31.478 | 1.00 | 53.44 | C |
| ATOM | 4175 | O   | PHE | D | 148 | -35.090 | 35.162 | -32.479 | 1.00 | 64.31 | O |
| ATOM | 4176 | CB  | PHE | D | 148 | -33.370 | 33.223 | -30.875 | 1.00 | 48.19 | C |
| ATOM | 4177 | CG  | PHE | D | 148 | -31.960 | 33.690 | -31.144 | 1.00 | 50.64 | C |
| ATOM | 4178 | CD1 | PHE | D | 148 | -31.030 | 33.764 | -30.119 | 1.00 | 48.34 | C |
| ATOM | 4179 | CD2 | PHE | D | 148 | -31.566 | 34.062 | -32.421 | 1.00 | 51.90 | C |
| ATOM | 4180 | CE1 | PHE | D | 148 | -29.738 | 34.192 | -30.368 | 1.00 | 50.06 | C |
| ATOM | 4181 | CE2 | PHE | D | 148 | -30.267 | 34.489 | -32.665 | 1.00 | 53.98 | C |
| ATOM | 4182 | CZ  | PHE | D | 148 | -29.359 | 34.566 | -31.635 | 1.00 | 49.85 | C |
| ATOM | 4183 | N   | VAL | D | 149 | -33.854 | 36.573 | -31.274 | 1.00 | 52.78 | N |
| ATOM | 4184 | CA  | VAL | D | 149 | -33.998 | 37.709 | -32.147 | 1.00 | 48.09 | C |
| ATOM | 4185 | C   | VAL | D | 149 | -32.638 | 38.407 | -32.328 | 1.00 | 50.12 | C |
| ATOM | 4186 | O   | VAL | D | 149 | -31.910 | 38.633 | -31.366 | 1.00 | 50.68 | O |
| ATOM | 4187 | CB  | VAL | D | 149 | -35.044 | 38.681 | -31.580 | 1.00 | 52.62 | C |
| ATOM | 4188 | CG1 | VAL | D | 149 | -35.157 | 39.949 | -32.408 | 1.00 | 55.54 | C |
| ATOM | 4189 | CG2 | VAL | D | 149 | -36.396 | 38.012 | -31.450 | 1.00 | 65.07 | C |
| ATOM | 4190 | N   | VAL | D | 150 | -32.328 | 38.755 | -33.580 | 1.00 | 48.28 | N |
| ATOM | 4191 | CA  | VAL | D | 150 | -31.224 | 39.615 | -33.968 | 1.00 | 47.81 | C |
| ATOM | 4192 | C   | VAL | D | 150 | -31.679 | 41.072 | -33.871 | 1.00 | 55.50 | C |
| ATOM | 4193 | O   | VAL | D | 150 | -32.638 | 41.452 | -34.509 | 1.00 | 60.33 | O |
| ATOM | 4194 | CB  | VAL | D | 150 | -30.777 | 39.274 | -35.397 | 1.00 | 46.32 | C |
| ATOM | 4195 | CG1 | VAL | D | 150 | -29.752 | 40.255 | -35.933 | 1.00 | 51.52 | C |
| ATOM | 4196 | CG2 | VAL | D | 150 | -30.241 | 37.858 | -35.473 | 1.00 | 49.47 | C |
| ATOM | 4197 | N   | HIS | D | 151 | -30.980 | 41.884 | -33.070 | 1.00 | 58.60 | N |

|      |      |     |     |   |     |         |        |         |      |       |     |
|------|------|-----|-----|---|-----|---------|--------|---------|------|-------|-----|
| ATOM | 4198 | CA  | HIS | D | 151 | -31.350 | 43.283 | -32.895 | 1.00 | 52.22 | C   |
| ATOM | 4199 | C   | HIS | D | 151 | -30.827 | 44.081 | -34.089 | 1.00 | 52.76 | C   |
| ATOM | 4200 | O   | HIS | D | 151 | -31.600 | 44.613 | -34.863 | 1.00 | 51.28 | O   |
| ATOM | 4201 | CB  | HIS | D | 151 | -30.838 | 43.817 | -31.554 | 1.00 | 53.42 | C   |
| ATOM | 4202 | CG  | HIS | D | 151 | -31.291 | 45.206 | -31.260 | 1.00 | 57.93 | C   |
| ATOM | 4203 | CD2 | HIS | D | 151 | -32.483 | 45.812 | -31.462 | 1.00 | 60.70 | C   |
| ATOM | 4204 | ND1 | HIS | D | 151 | -30.466 | 46.143 | -30.680 | 1.00 | 54.03 | N   |
| ATOM | 4205 | CE1 | HIS | D | 151 | -31.134 | 47.270 | -30.528 | 1.00 | 62.57 | C   |
| ATOM | 4206 | NE2 | HIS | D | 151 | -32.381 | 47.091 | -31.000 | 1.00 | 60.29 | N   |
| ATOM | 4207 | N   | GLY | D | 152 | -29.501 | 44.117 | -34.230 | 1.00 | 50.43 | N   |
| ATOM | 4208 | CA  | GLY | D | 152 | -28.841 | 44.807 | -35.302 | 1.00 | 51.45 | C   |
| ATOM | 4209 | C   | GLY | D | 152 | -28.186 | 43.809 | -36.227 | 1.00 | 50.12 | C   |
| ATOM | 4210 | O   | GLY | D | 152 | -27.341 | 43.058 | -35.773 | 1.00 | 55.88 | O   |
| ATOM | 4211 | N   | ASP | D | 153 | -28.590 | 43.813 | -37.506 | 1.00 | 51.31 | N   |
| ATOM | 4212 | CA  | ASP | D | 153 | -28.164 | 42.823 | -38.503 | 1.00 | 48.19 | C   |
| ATOM | 4213 | C   | ASP | D | 153 | -27.101 | 43.457 | -39.395 | 1.00 | 47.45 | C   |
| ATOM | 4214 | O   | ASP | D | 153 | -27.393 | 44.378 | -40.142 | 1.00 | 46.98 | O   |
| ATOM | 4215 | CB  | ASP | D | 153 | -29.343 | 42.265 | -39.313 | 1.00 | 47.28 | C   |
| ATOM | 4216 | CG  | ASP | D | 153 | -28.972 | 41.101 | -40.230 | 1.00 | 49.23 | C   |
| ATOM | 4217 | OD1 | ASP | D | 153 | -27.940 | 41.222 | -40.932 | 1.00 | 48.25 | O   |
| ATOM | 4218 | OD2 | ASP | D | 153 | -29.710 | 40.072 | -40.236 | 1.00 | 42.91 | O1- |
| ATOM | 4219 | N   | SER | D | 154 | -25.876 | 42.929 | -39.292 | 1.00 | 49.50 | N   |
| ATOM | 4220 | CA  | SER | D | 154 | -24.718 | 43.376 | -40.046 | 1.00 | 52.96 | C   |
| ATOM | 4221 | C   | SER | D | 154 | -24.704 | 42.822 | -41.475 | 1.00 | 51.79 | C   |
| ATOM | 4222 | O   | SER | D | 154 | -23.824 | 43.197 | -42.254 | 1.00 | 53.40 | O   |
| ATOM | 4223 | CB  | SER | D | 154 | -23.444 | 42.995 | -39.349 | 1.00 | 56.81 | C   |
| ATOM | 4224 | OG  | SER | D | 154 | -23.385 | 41.598 | -39.140 | 1.00 | 57.73 | O   |
| ATOM | 4225 | N   | SER | D | 155 | -25.628 | 41.917 | -41.813 | 1.00 | 47.81 | N   |
| ATOM | 4226 | CA  | SER | D | 155 | -25.701 | 41.415 | -43.206 | 1.00 | 49.95 | C   |
| ATOM | 4227 | C   | SER | D | 155 | -26.669 | 42.271 | -44.052 | 1.00 | 53.32 | C   |
| ATOM | 4228 | O   | SER | D | 155 | -26.494 | 42.312 | -45.272 | 1.00 | 46.09 | O   |
| ATOM | 4229 | CB  | SER | D | 155 | -26.070 | 39.955 | -43.258 | 1.00 | 43.83 | C   |
| ATOM | 4230 | OG  | SER | D | 155 | -27.365 | 39.753 | -42.718 | 1.00 | 46.11 | O   |

|      |      |     |     |   |     |         |        |         |      |       |   |
|------|------|-----|-----|---|-----|---------|--------|---------|------|-------|---|
| ATOM | 4231 | N   | SER | D | 156 | -27.636 | 42.965 | -43.408 | 1.00 | 51.27 | N |
| ATOM | 4232 | CA  | SER | D | 156 | -28.742 | 43.685 | -44.099 | 1.00 | 54.29 | C |
| ATOM | 4233 | C   | SER | D | 156 | -28.723 | 45.211 | -43.882 | 1.00 | 58.04 | C |
| ATOM | 4234 | O   | SER | D | 156 | -28.922 | 45.993 | -44.822 | 1.00 | 61.80 | O |
| ATOM | 4235 | CB  | SER | D | 156 | -30.075 | 43.110 | -43.709 | 1.00 | 48.75 | C |
| ATOM | 4236 | OG  | SER | D | 156 | -30.222 | 43.061 | -42.313 | 1.00 | 49.43 | O |
| ATOM | 4237 | N   | GLY | D | 157 | -28.508 | 45.635 | -42.640 | 1.00 | 61.05 | N |
| ATOM | 4238 | CA  | GLY | D | 157 | -28.534 | 47.027 | -42.261 | 1.00 | 55.19 | C |
| ATOM | 4239 | C   | GLY | D | 157 | -29.814 | 47.335 | -41.527 | 1.00 | 56.98 | C |
| ATOM | 4240 | O   | GLY | D | 157 | -30.214 | 48.498 | -41.436 | 1.00 | 59.40 | O |
| ATOM | 4241 | N   | LEU | D | 158 | -30.413 | 46.283 | -40.961 | 1.00 | 50.78 | N |
| ATOM | 4242 | CA  | LEU | D | 158 | -31.734 | 46.324 | -40.376 | 1.00 | 50.29 | C |
| ATOM | 4243 | C   | LEU | D | 158 | -31.659 | 46.478 | -38.851 | 1.00 | 49.52 | C |
| ATOM | 4244 | O   | LEU | D | 158 | -30.963 | 45.701 | -38.174 | 1.00 | 54.54 | O |
| ATOM | 4245 | CB  | LEU | D | 158 | -32.432 | 45.012 | -40.737 | 1.00 | 53.07 | C |
| ATOM | 4246 | CG  | LEU | D | 158 | -33.939 | 44.983 | -40.492 | 1.00 | 56.85 | C |
| ATOM | 4247 | CD1 | LEU | D | 158 | -34.624 | 46.106 | -41.255 | 1.00 | 53.03 | C |
| ATOM | 4248 | CD2 | LEU | D | 158 | -34.528 | 43.634 | -40.886 | 1.00 | 57.84 | C |
| ATOM | 4249 | N   | LEU | D | 159 | -32.422 | 47.432 | -38.306 | 1.00 | 49.64 | N |
| ATOM | 4250 | CA  | LEU | D | 159 | -32.694 | 47.504 | -36.863 | 1.00 | 51.75 | C |
| ATOM | 4251 | C   | LEU | D | 159 | -34.132 | 47.029 | -36.574 | 1.00 | 52.29 | C |
| ATOM | 4252 | O   | LEU | D | 159 | -35.072 | 47.566 | -37.132 | 1.00 | 67.55 | O |
| ATOM | 4253 | CB  | LEU | D | 159 | -32.472 | 48.941 | -36.376 | 1.00 | 50.80 | C |
| ATOM | 4254 | CG  | LEU | D | 159 | -32.475 | 49.106 | -34.849 | 1.00 | 55.35 | C |
| ATOM | 4255 | CD1 | LEU | D | 159 | -31.259 | 48.445 | -34.231 | 1.00 | 57.19 | C |
| ATOM | 4256 | CD2 | LEU | D | 159 | -32.561 | 50.574 | -34.416 | 1.00 | 54.48 | C |
| ATOM | 4257 | N   | GLN | D | 160 | -34.278 | 46.086 | -35.636 | 1.00 | 47.09 | N |
| ATOM | 4258 | CA  | GLN | D | 160 | -35.537 | 45.457 | -35.246 | 1.00 | 51.59 | C |
| ATOM | 4259 | C   | GLN | D | 160 | -36.083 | 46.056 | -33.948 | 1.00 | 54.70 | C |
| ATOM | 4260 | O   | GLN | D | 160 | -35.578 | 45.741 | -32.879 | 1.00 | 63.36 | O |
| ATOM | 4261 | CB  | GLN | D | 160 | -35.296 | 43.958 | -35.032 | 1.00 | 52.47 | C |
| ATOM | 4262 | CG  | GLN | D | 160 | -36.444 | 43.199 | -34.364 | 1.00 | 50.25 | C |
| ATOM | 4263 | CD  | GLN | D | 160 | -37.654 | 43.206 | -35.265 | 1.00 | 57.34 | C |

|      |      |     |     |   |     |         |        |         |      |       |     |
|------|------|-----|-----|---|-----|---------|--------|---------|------|-------|-----|
| ATOM | 4264 | NE2 | GLN | D | 160 | -38.767 | 43.735 | -34.770 | 1.00 | 55.22 | N   |
| ATOM | 4265 | OE1 | GLN | D | 160 | -37.576 | 42.775 | -36.414 | 1.00 | 56.18 | O   |
| ATOM | 4266 | N   | PRO | D | 161 | -37.152 | 46.887 | -33.952 | 1.00 | 56.05 | N   |
| ATOM | 4267 | CA  | PRO | D | 161 | -37.755 | 47.355 | -32.702 | 1.00 | 58.34 | C   |
| ATOM | 4268 | C   | PRO | D | 161 | -38.110 | 46.195 | -31.759 | 1.00 | 60.38 | C   |
| ATOM | 4269 | O   | PRO | D | 161 | -38.533 | 45.141 | -32.221 | 1.00 | 62.80 | O   |
| ATOM | 4270 | CB  | PRO | D | 161 | -39.038 | 48.092 | -33.113 | 1.00 | 57.99 | C   |
| ATOM | 4271 | CG  | PRO | D | 161 | -38.890 | 48.372 | -34.595 | 1.00 | 54.10 | C   |
| ATOM | 4272 | CD  | PRO | D | 161 | -37.811 | 47.454 | -35.136 | 1.00 | 54.39 | C   |
| ATOM | 4273 | N   | LEU | D | 162 | -37.904 | 46.413 | -30.456 | 1.00 | 62.54 | N   |
| ATOM | 4274 | CA  | LEU | D | 162 | -38.018 | 45.378 | -29.429 | 1.00 | 59.25 | C   |
| ATOM | 4275 | C   | LEU | D | 162 | -38.997 | 45.804 | -28.334 | 1.00 | 57.08 | C   |
| ATOM | 4276 | O   | LEU | D | 162 | -39.367 | 44.955 | -27.508 | 1.00 | 61.59 | O   |
| ATOM | 4277 | CB  | LEU | D | 162 | -36.654 | 45.139 | -28.769 | 1.00 | 64.99 | C   |
| ATOM | 4278 | CG  | LEU | D | 162 | -35.525 | 44.608 | -29.644 | 1.00 | 63.61 | C   |
| ATOM | 4279 | CD1 | LEU | D | 162 | -34.219 | 44.615 | -28.865 | 1.00 | 65.23 | C   |
| ATOM | 4280 | CD2 | LEU | D | 162 | -35.830 | 43.212 | -30.148 | 1.00 | 65.11 | C   |
| ATOM | 4281 | N   | GLU | D | 163 | -39.327 | 47.103 | -28.266 | 1.00 | 54.51 | N   |
| ATOM | 4282 | CA  | GLU | D | 163 | -40.300 | 47.632 | -27.291 | 1.00 | 57.73 | C   |
| ATOM | 4283 | C   | GLU | D | 163 | -41.517 | 46.694 | -27.219 | 1.00 | 55.75 | C   |
| ATOM | 4284 | O   | GLU | D | 163 | -42.081 | 46.368 | -28.240 | 1.00 | 64.37 | O   |
| ATOM | 4285 | CB  | GLU | D | 163 | -40.711 | 49.039 | -27.709 | 1.00 | 62.11 | C   |
| ATOM | 4286 | CG  | GLU | D | 163 | -39.585 | 50.047 | -27.654 | 1.00 | 71.72 | C   |
| ATOM | 4287 | CD  | GLU | D | 163 | -39.886 | 51.223 | -26.733 | 1.00 | 82.23 | C   |
| ATOM | 4288 | OE1 | GLU | D | 163 | -39.091 | 51.472 | -25.793 | 1.00 | 78.85 | O   |
| ATOM | 4289 | OE2 | GLU | D | 163 | -40.929 | 51.883 | -26.944 | 1.00 | 84.41 | O1- |
| ATOM | 4290 | N   | GLY | D | 164 | -41.835 | 46.173 | -26.028 | 1.00 | 54.57 | N   |
| ATOM | 4291 | CA  | GLY | D | 164 | -43.011 | 45.334 | -25.797 | 1.00 | 50.98 | C   |
| ATOM | 4292 | C   | GLY | D | 164 | -42.742 | 43.838 | -25.882 | 1.00 | 56.01 | C   |
| ATOM | 4293 | O   | GLY | D | 164 | -43.249 | 43.072 | -25.057 | 1.00 | 56.48 | O   |
| ATOM | 4294 | N   | LEU | D | 165 | -41.976 | 43.404 | -26.895 | 1.00 | 58.26 | N   |
| ATOM | 4295 | CA  | LEU | D | 165 | -41.709 | 41.965 | -27.210 | 1.00 | 52.50 | C   |
| ATOM | 4296 | C   | LEU | D | 165 | -41.375 | 41.136 | -25.966 | 1.00 | 56.87 | C   |



|      |      |     |     |   |     |         |        |         |      |       |     |
|------|------|-----|-----|---|-----|---------|--------|---------|------|-------|-----|
| ATOM | 4297 | O   | LEU | D | 165 | -41.671 | 39.926 | -25.913 | 1.00 | 64.41 | O   |
| ATOM | 4298 | CB  | LEU | D | 165 | -40.535 | 41.887 | -28.188 | 1.00 | 56.79 | C   |
| ATOM | 4299 | CG  | LEU | D | 165 | -40.099 | 40.474 | -28.586 | 1.00 | 59.26 | C   |
| ATOM | 4300 | CD1 | LEU | D | 165 | -41.236 | 39.701 | -29.225 | 1.00 | 62.88 | C   |
| ATOM | 4301 | CD2 | LEU | D | 165 | -38.912 | 40.512 | -29.526 | 1.00 | 57.52 | C   |
| ATOM | 4302 | N   | GLY | D | 166 | -40.679 | 41.770 | -25.017 | 1.00 | 61.12 | N   |
| ATOM | 4303 | CA  | GLY | D | 166 | -40.349 | 41.193 | -23.740 | 1.00 | 55.77 | C   |
| ATOM | 4304 | C   | GLY | D | 166 | -41.580 | 40.714 | -23.002 | 1.00 | 57.24 | C   |
| ATOM | 4305 | O   | GLY | D | 166 | -41.624 | 39.548 | -22.579 | 1.00 | 59.18 | O   |
| ATOM | 4306 | N   | LYS | D | 167 | -42.575 | 41.602 | -22.864 | 1.00 | 61.12 | N   |
| ATOM | 4307 | CA  | LYS | D | 167 | -43.733 | 41.349 | -21.983 | 1.00 | 68.57 | C   |
| ATOM | 4308 | C   | LYS | D | 167 | -44.543 | 40.182 | -22.542 | 1.00 | 65.74 | C   |
| ATOM | 4309 | O   | LYS | D | 167 | -44.939 | 39.274 | -21.790 | 1.00 | 63.73 | O   |
| ATOM | 4310 | CB  | LYS | D | 167 | -44.676 | 42.549 | -21.824 | 1.00 | 70.97 | C   |
| ATOM | 4311 | CG  | LYS | D | 167 | -45.659 | 42.408 | -20.661 | 1.00 | 79.25 | C   |
| ATOM | 4312 | CD  | LYS | D | 167 | -47.003 | 43.085 | -20.864 | 1.00 | 89.10 | C   |
| ATOM | 4313 | CE  | LYS | D | 167 | -47.613 | 43.621 | -19.582 | 1.00 | 95.74 | C   |
| ATOM | 4314 | NZ  | LYS | D | 167 | -46.874 | 44.801 | -19.062 | 1.00 | 99.25 | N1+ |
| ATOM | 4315 | N   | ILE | D | 168 | -44.773 | 40.250 | -23.857 | 1.00 | 63.81 | N   |
| ATOM | 4316 | CA  | ILE | D | 168 | -45.491 | 39.250 | -24.607 | 1.00 | 59.23 | C   |
| ATOM | 4317 | C   | ILE | D | 168 | -44.863 | 37.884 | -24.329 | 1.00 | 59.51 | C   |
| ATOM | 4318 | O   | ILE | D | 168 | -45.526 | 37.003 | -23.788 | 1.00 | 52.56 | O   |
| ATOM | 4319 | CB  | ILE | D | 168 | -45.470 | 39.625 | -26.096 | 1.00 | 64.22 | C   |
| ATOM | 4320 | CG1 | ILE | D | 168 | -46.364 | 40.842 | -26.361 | 1.00 | 69.40 | C   |
| ATOM | 4321 | CG2 | ILE | D | 168 | -45.843 | 38.431 | -26.968 | 1.00 | 64.87 | C   |
| ATOM | 4322 | CD1 | ILE | D | 168 | -46.007 | 41.596 | -27.628 | 1.00 | 76.52 | C   |
| ATOM | 4323 | N   | CYS | D | 169 | -43.573 | 37.744 | -24.680 | 1.00 | 66.53 | N   |
| ATOM | 4324 | CA  | CYS | D | 169 | -42.786 | 36.534 | -24.408 | 1.00 | 59.63 | C   |
| ATOM | 4325 | C   | CYS | D | 169 | -43.097 | 36.004 | -23.005 | 1.00 | 59.00 | C   |
| ATOM | 4326 | O   | CYS | D | 169 | -43.340 | 34.812 | -22.839 | 1.00 | 62.98 | O   |
| ATOM | 4327 | CB  | CYS | D | 169 | -41.292 | 36.806 | -24.505 | 1.00 | 58.85 | C   |
| ATOM | 4328 | SG  | CYS | D | 169 | -40.621 | 36.639 | -26.175 | 1.00 | 60.22 | S   |
| ATOM | 4329 | N   | HIS | D | 170 | -43.089 | 36.904 | -22.015 | 1.00 | 57.52 | N   |

|      |      |     |     |   |     |         |        |         |      |       |     |
|------|------|-----|-----|---|-----|---------|--------|---------|------|-------|-----|
| ATOM | 4330 | CA  | HIS | D | 170 | -43.264 | 36.547 | -20.587 | 1.00 | 63.72 | C   |
| ATOM | 4331 | C   | HIS | D | 170 | -44.716 | 36.193 | -20.213 | 1.00 | 64.50 | C   |
| ATOM | 4332 | O   | HIS | D | 170 | -44.915 | 35.364 | -19.319 | 1.00 | 67.85 | O   |
| ATOM | 4333 | CB  | HIS | D | 170 | -42.748 | 37.673 | -19.686 | 1.00 | 66.45 | C   |
| ATOM | 4334 | CG  | HIS | D | 170 | -41.270 | 37.848 | -19.724 | 1.00 | 66.00 | C   |
| ATOM | 4335 | CD2 | HIS | D | 170 | -40.283 | 36.976 | -20.020 | 1.00 | 66.97 | C   |
| ATOM | 4336 | ND1 | HIS | D | 170 | -40.662 | 39.056 | -19.438 | 1.00 | 65.29 | N   |
| ATOM | 4337 | CE1 | HIS | D | 170 | -39.360 | 38.914 | -19.549 | 1.00 | 69.91 | C   |
| ATOM | 4338 | NE2 | HIS | D | 170 | -39.103 | 37.643 | -19.907 | 1.00 | 69.80 | N   |
| ATOM | 4339 | N   | ASP | D | 171 | -45.717 | 36.821 | -20.854 | 1.00 | 65.31 | N   |
| ATOM | 4340 | CA  | ASP | D | 171 | -47.127 | 36.398 | -20.722 | 1.00 | 61.93 | C   |
| ATOM | 4341 | C   | ASP | D | 171 | -47.239 | 34.916 | -21.127 | 1.00 | 67.82 | C   |
| ATOM | 4342 | O   | ASP | D | 171 | -48.021 | 34.146 | -20.526 | 1.00 | 62.13 | O   |
| ATOM | 4343 | CB  | ASP | D | 171 | -48.090 | 37.232 | -21.577 | 1.00 | 59.51 | C   |
| ATOM | 4344 | CG  | ASP | D | 171 | -48.197 | 38.710 | -21.224 | 1.00 | 63.67 | C   |
| ATOM | 4345 | OD1 | ASP | D | 171 | -48.076 | 39.059 | -20.034 | 1.00 | 64.10 | O   |
| ATOM | 4346 | OD2 | ASP | D | 171 | -48.416 | 39.508 | -22.151 | 1.00 | 68.51 | O1- |
| ATOM | 4347 | N   | TYR | D | 172 | -46.438 | 34.523 | -22.131 | 1.00 | 63.63 | N   |
| ATOM | 4348 | CA  | TYR | D | 172 | -46.455 | 33.178 | -22.706 | 1.00 | 61.24 | C   |
| ATOM | 4349 | C   | TYR | D | 172 | -45.327 | 32.316 | -22.111 | 1.00 | 61.68 | C   |
| ATOM | 4350 | O   | TYR | D | 172 | -44.948 | 31.288 | -22.698 | 1.00 | 53.68 | O   |
| ATOM | 4351 | CB  | TYR | D | 172 | -46.370 | 33.277 | -24.235 | 1.00 | 64.91 | C   |
| ATOM | 4352 | CG  | TYR | D | 172 | -47.634 | 33.755 | -24.909 | 1.00 | 73.46 | C   |
| ATOM | 4353 | CD1 | TYR | D | 172 | -48.767 | 32.951 | -24.956 | 1.00 | 78.66 | C   |
| ATOM | 4354 | CD2 | TYR | D | 172 | -47.708 | 35.006 | -25.504 | 1.00 | 76.58 | C   |
| ATOM | 4355 | CE1 | TYR | D | 172 | -49.936 | 33.380 | -25.568 | 1.00 | 78.10 | C   |
| ATOM | 4356 | CE2 | TYR | D | 172 | -48.870 | 35.450 | -26.120 | 1.00 | 83.30 | C   |
| ATOM | 4357 | CZ  | TYR | D | 172 | -49.989 | 34.634 | -26.151 | 1.00 | 85.26 | C   |
| ATOM | 4358 | OH  | TYR | D | 172 | -51.139 | 35.056 | -26.760 | 1.00 | 87.04 | O   |
| ATOM | 4359 | N   | ASP | D | 173 | -44.787 | 32.729 | -20.953 | 1.00 | 68.91 | N   |
| ATOM | 4360 | CA  | ASP | D | 173 | -43.817 | 31.928 | -20.151 | 1.00 | 68.92 | C   |
| ATOM | 4361 | C   | ASP | D | 173 | -42.546 | 31.590 | -20.969 | 1.00 | 63.15 | C   |
| ATOM | 4362 | O   | ASP | D | 173 | -42.001 | 30.493 | -20.805 | 1.00 | 57.24 | O   |

|      |      |     |     |   |     |         |        |         |      |       |     |
|------|------|-----|-----|---|-----|---------|--------|---------|------|-------|-----|
| ATOM | 4363 | CB  | ASP | D | 173 | -44.517 | 30.675 | -19.607 | 1.00 | 70.75 | C   |
| ATOM | 4364 | CG  | ASP | D | 173 | -43.859 | 30.071 | -18.379 | 1.00 | 72.48 | C   |
| ATOM | 4365 | OD1 | ASP | D | 173 | -43.200 | 30.814 | -17.655 | 1.00 | 71.36 | O   |
| ATOM | 4366 | OD2 | ASP | D | 173 | -43.992 | 28.852 | -18.177 | 1.00 | 79.79 | O1- |
| ATOM | 4367 | N   | CYS | D | 174 | -42.068 | 32.554 | -21.790 | 1.00 | 60.44 | N   |
| ATOM | 4368 | CA  | CYS | D | 174 | -40.991 | 32.400 | -22.822 | 1.00 | 62.27 | C   |
| ATOM | 4369 | C   | CYS | D | 174 | -39.874 | 33.442 | -22.596 | 1.00 | 62.62 | C   |
| ATOM | 4370 | O   | CYS | D | 174 | -40.143 | 34.634 | -22.506 | 1.00 | 58.38 | O   |
| ATOM | 4371 | CB  | CYS | D | 174 | -41.552 | 32.557 | -24.237 | 1.00 | 56.84 | C   |
| ATOM | 4372 | SG  | CYS | D | 174 | -40.323 | 32.492 | -25.577 | 1.00 | 64.03 | S   |
| ATOM | 4373 | N   | LEU | D | 175 | -38.615 | 32.974 | -22.553 | 1.00 | 59.62 | N   |
| ATOM | 4374 | CA  | LEU | D | 175 | -37.413 | 33.820 | -22.458 | 1.00 | 54.12 | C   |
| ATOM | 4375 | C   | LEU | D | 175 | -37.175 | 34.554 | -23.786 | 1.00 | 54.64 | C   |
| ATOM | 4376 | O   | LEU | D | 175 | -37.311 | 33.976 | -24.861 | 1.00 | 57.56 | O   |
| ATOM | 4377 | CB  | LEU | D | 175 | -36.201 | 32.943 | -22.147 | 1.00 | 51.84 | C   |
| ATOM | 4378 | CG  | LEU | D | 175 | -36.235 | 32.174 | -20.829 | 1.00 | 52.02 | C   |
| ATOM | 4379 | CD1 | LEU | D | 175 | -34.968 | 31.346 | -20.656 | 1.00 | 49.84 | C   |
| ATOM | 4380 | CD2 | LEU | D | 175 | -36.425 | 33.108 | -19.643 | 1.00 | 53.86 | C   |
| ATOM | 4381 | N   | LEU | D | 176 | -36.752 | 35.813 | -23.693 | 1.00 | 47.73 | N   |
| ATOM | 4382 | CA  | LEU | D | 176 | -36.389 | 36.605 | -24.868 | 1.00 | 52.11 | C   |
| ATOM | 4383 | C   | LEU | D | 176 | -34.848 | 36.719 | -24.968 | 1.00 | 56.15 | C   |
| ATOM | 4384 | O   | LEU | D | 176 | -34.215 | 37.360 | -24.117 | 1.00 | 54.78 | O   |
| ATOM | 4385 | CB  | LEU | D | 176 | -37.060 | 37.975 | -24.718 | 1.00 | 47.73 | C   |
| ATOM | 4386 | CG  | LEU | D | 176 | -36.609 | 39.035 | -25.709 | 1.00 | 45.57 | C   |
| ATOM | 4387 | CD1 | LEU | D | 176 | -36.724 | 38.522 | -27.134 | 1.00 | 50.07 | C   |
| ATOM | 4388 | CD2 | LEU | D | 176 | -37.400 | 40.311 | -25.538 | 1.00 | 44.20 | C   |
| ATOM | 4389 | N   | LEU | D | 177 | -34.256 | 36.097 | -25.997 | 1.00 | 50.99 | N   |
| ATOM | 4390 | CA  | LEU | D | 177 | -32.804 | 36.103 | -26.250 | 1.00 | 51.37 | C   |
| ATOM | 4391 | C   | LEU | D | 177 | -32.472 | 37.076 | -27.386 | 1.00 | 55.39 | C   |
| ATOM | 4392 | O   | LEU | D | 177 | -33.099 | 36.982 | -28.431 | 1.00 | 62.06 | O   |
| ATOM | 4393 | CB  | LEU | D | 177 | -32.378 | 34.693 | -26.661 | 1.00 | 48.43 | C   |
| ATOM | 4394 | CG  | LEU | D | 177 | -32.657 | 33.590 | -25.645 | 1.00 | 53.14 | C   |
| ATOM | 4395 | CD1 | LEU | D | 177 | -32.084 | 32.262 | -26.118 | 1.00 | 56.30 | C   |

|      |      |     |     |   |     |         |        |         |      |       |     |
|------|------|-----|-----|---|-----|---------|--------|---------|------|-------|-----|
| ATOM | 4396 | CD2 | LEU | D | 177 | -32.110 | 33.932 | -24.275 | 1.00 | 50.61 | C   |
| ATOM | 4397 | N   | VAL | D | 178 | -31.456 | 37.947 | -27.216 | 1.00 | 55.08 | N   |
| ATOM | 4398 | CA  | VAL | D | 178 | -31.158 | 39.001 | -28.220 | 1.00 | 52.96 | C   |
| ATOM | 4399 | C   | VAL | D | 178 | -29.666 | 39.029 | -28.580 | 1.00 | 58.05 | C   |
| ATOM | 4400 | O   | VAL | D | 178 | -28.824 | 39.067 | -27.690 | 1.00 | 69.43 | O   |
| ATOM | 4401 | CB  | VAL | D | 178 | -31.622 | 40.377 | -27.717 | 1.00 | 52.67 | C   |
| ATOM | 4402 | CG1 | VAL | D | 178 | -31.505 | 41.440 | -28.796 | 1.00 | 53.37 | C   |
| ATOM | 4403 | CG2 | VAL | D | 178 | -33.043 | 40.338 | -27.172 | 1.00 | 55.14 | C   |
| ATOM | 4404 | N   | ASP | D | 179 | -29.361 | 39.056 | -29.890 | 1.00 | 54.76 | N   |
| ATOM | 4405 | CA  | ASP | D | 179 | -28.003 | 39.306 | -30.430 | 1.00 | 49.04 | C   |
| ATOM | 4406 | C   | ASP | D | 179 | -27.862 | 40.819 | -30.631 | 1.00 | 52.11 | C   |
| ATOM | 4407 | O   | ASP | D | 179 | -28.430 | 41.366 | -31.580 | 1.00 | 55.11 | O   |
| ATOM | 4408 | CB  | ASP | D | 179 | -27.731 | 38.563 | -31.753 | 1.00 | 44.14 | C   |
| ATOM | 4409 | CG  | ASP | D | 179 | -26.443 | 38.937 | -32.498 | 1.00 | 42.52 | C   |
| ATOM | 4410 | OD1 | ASP | D | 179 | -26.037 | 40.095 | -32.415 | 1.00 | 45.20 | O   |
| ATOM | 4411 | OD2 | ASP | D | 179 | -25.849 | 38.071 | -33.180 | 1.00 | 41.89 | O1- |
| ATOM | 4412 | N   | ALA | D | 180 | -27.075 | 41.477 | -29.768 | 1.00 | 52.08 | N   |
| ATOM | 4413 | CA  | ALA | D | 180 | -26.834 | 42.924 | -29.887 | 1.00 | 53.90 | C   |
| ATOM | 4414 | C   | ALA | D | 180 | -25.391 | 43.231 | -30.336 | 1.00 | 50.07 | C   |
| ATOM | 4415 | O   | ALA | D | 180 | -24.883 | 44.306 | -30.073 | 1.00 | 54.55 | O   |
| ATOM | 4416 | CB  | ALA | D | 180 | -27.188 | 43.589 | -28.577 | 1.00 | 53.63 | C   |
| ATOM | 4417 | N   | VAL | D | 181 | -24.754 | 42.306 | -31.066 | 1.00 | 47.40 | N   |
| ATOM | 4418 | CA  | VAL | D | 181 | -23.360 | 42.431 | -31.454 | 1.00 | 41.17 | C   |
| ATOM | 4419 | C   | VAL | D | 181 | -23.163 | 43.729 | -32.255 | 1.00 | 44.57 | C   |
| ATOM | 4420 | O   | VAL | D | 181 | -22.185 | 44.428 | -32.019 | 1.00 | 47.69 | O   |
| ATOM | 4421 | CB  | VAL | D | 181 | -22.857 | 41.209 | -32.254 | 1.00 | 37.46 | C   |
| ATOM | 4422 | CG1 | VAL | D | 181 | -21.502 | 41.467 | -32.882 | 1.00 | 33.69 | C   |
| ATOM | 4423 | CG2 | VAL | D | 181 | -22.804 | 39.926 | -31.443 | 1.00 | 40.14 | C   |
| ATOM | 4424 | N   | ALA | D | 182 | -24.064 | 44.038 | -33.200 | 1.00 | 45.10 | N   |
| ATOM | 4425 | CA  | ALA | D | 182 | -23.872 | 45.188 | -34.122 | 1.00 | 46.35 | C   |
| ATOM | 4426 | C   | ALA | D | 182 | -24.658 | 46.424 | -33.664 | 1.00 | 44.74 | C   |
| ATOM | 4427 | O   | ALA | D | 182 | -24.404 | 47.523 | -34.159 | 1.00 | 48.59 | O   |
| ATOM | 4428 | CB  | ALA | D | 182 | -24.242 | 44.815 | -35.537 | 1.00 | 45.80 | C   |

|      |      |     |           |         |        |         |      |       |   |
|------|------|-----|-----------|---------|--------|---------|------|-------|---|
| ATOM | 4429 | N   | SER D 183 | -25.579 | 46.260 | -32.712 | 1.00 | 43.70 | N |
| ATOM | 4430 | CA  | SER D 183 | -26.376 | 47.396 | -32.206 | 1.00 | 47.41 | C |
| ATOM | 4431 | C   | SER D 183 | -25.653 | 48.162 | -31.083 | 1.00 | 49.20 | C |
| ATOM | 4432 | O   | SER D 183 | -25.492 | 49.383 | -31.194 | 1.00 | 49.08 | O |
| ATOM | 4433 | CB  | SER D 183 | -27.745 | 46.954 | -31.740 | 1.00 | 42.24 | C |
| ATOM | 4434 | OG  | SER D 183 | -27.650 | 45.838 | -30.879 | 1.00 | 43.95 | O |
| ATOM | 4435 | N   | LEU D 184 | -25.244 | 47.447 | -30.019 | 1.00 | 46.99 | N |
| ATOM | 4436 | CA  | LEU D 184 | -24.949 | 48.038 | -28.694 | 1.00 | 45.83 | C |
| ATOM | 4437 | C   | LEU D 184 | -23.947 | 49.196 | -28.807 | 1.00 | 47.07 | C |
| ATOM | 4438 | O   | LEU D 184 | -22.952 | 49.101 | -29.530 | 1.00 | 47.29 | O |
| ATOM | 4439 | CB  | LEU D 184 | -24.394 | 46.958 | -27.776 | 1.00 | 44.50 | C |
| ATOM | 4440 | CG  | LEU D 184 | -24.612 | 47.213 | -26.292 | 1.00 | 45.26 | C |
| ATOM | 4441 | CD1 | LEU D 184 | -26.085 | 47.082 | -25.939 | 1.00 | 39.79 | C |
| ATOM | 4442 | CD2 | LEU D 184 | -23.767 | 46.257 | -25.445 | 1.00 | 44.49 | C |
| ATOM | 4443 | N   | CYS D 185 | -24.244 | 50.295 | -28.103 | 1.00 | 45.10 | N |
| ATOM | 4444 | CA  | CYS D 185 | -23.422 | 51.491 | -28.096 | 1.00 | 46.68 | C |
| ATOM | 4445 | C   | CYS D 185 | -23.471 | 52.197 | -29.461 | 1.00 | 51.90 | C |
| ATOM | 4446 | O   | CYS D 185 | -22.681 | 53.163 | -29.714 | 1.00 | 55.53 | O |
| ATOM | 4447 | CB  | CYS D 185 | -21.972 | 51.175 | -27.724 | 1.00 | 48.38 | C |
| ATOM | 4448 | SG  | CYS D 185 | -21.817 | 50.392 | -26.101 | 1.00 | 46.02 | S |
| ATOM | 4449 | N   | GLY D 186 | -24.373 | 51.728 | -30.335 | 1.00 | 49.59 | N |
| ATOM | 4450 | CA  | GLY D 186 | -24.696 | 52.402 | -31.615 | 1.00 | 50.52 | C |
| ATOM | 4451 | C   | GLY D 186 | -26.094 | 53.021 | -31.637 | 1.00 | 43.83 | C |
| ATOM | 4452 | O   | GLY D 186 | -26.313 | 54.001 | -32.346 | 1.00 | 43.45 | O |
| ATOM | 4453 | N   | VAL D 187 | -27.020 | 52.434 | -30.869 | 1.00 | 37.98 | N |
| ATOM | 4454 | CA  | VAL D 187 | -28.395 | 52.863 | -30.721 | 1.00 | 41.53 | C |
| ATOM | 4455 | C   | VAL D 187 | -28.792 | 52.598 | -29.278 | 1.00 | 44.71 | C |
| ATOM | 4456 | O   | VAL D 187 | -28.159 | 51.771 | -28.618 | 1.00 | 43.72 | O |
| ATOM | 4457 | CB  | VAL D 187 | -29.355 | 52.074 | -31.649 | 1.00 | 41.30 | C |
| ATOM | 4458 | CG1 | VAL D 187 | -28.904 | 52.113 | -33.097 | 1.00 | 42.67 | C |
| ATOM | 4459 | CG2 | VAL D 187 | -29.552 | 50.625 | -31.185 | 1.00 | 38.19 | C |
| ATOM | 4460 | N   | PRO D 188 | -29.940 | 53.143 | -28.814 | 1.00 | 48.20 | N |
| ATOM | 4461 | CA  | PRO D 188 | -30.425 | 52.874 | -27.461 | 1.00 | 48.62 | C |

|      |      |     |     |   |     |         |        |         |      |       |   |
|------|------|-----|-----|---|-----|---------|--------|---------|------|-------|---|
| ATOM | 4462 | C   | PRO | D | 188 | -30.742 | 51.388 | -27.272 | 1.00 | 46.81 | C |
| ATOM | 4463 | O   | PRO | D | 188 | -31.239 | 50.752 | -28.182 | 1.00 | 54.82 | O |
| ATOM | 4464 | CB  | PRO | D | 188 | -31.701 | 53.723 | -27.298 | 1.00 | 45.99 | C |
| ATOM | 4465 | CG  | PRO | D | 188 | -31.647 | 54.717 | -28.443 | 1.00 | 46.11 | C |
| ATOM | 4466 | CD  | PRO | D | 188 | -30.853 | 54.036 | -29.547 | 1.00 | 49.79 | C |
| ATOM | 4467 | N   | PHE | D | 189 | -30.468 | 50.892 | -26.066 | 1.00 | 48.93 | N |
| ATOM | 4468 | CA  | PHE | D | 189 | -30.669 | 49.527 | -25.679 | 1.00 | 52.64 | C |
| ATOM | 4469 | C   | PHE | D | 189 | -30.850 | 49.508 | -24.164 | 1.00 | 50.44 | C |
| ATOM | 4470 | O   | PHE | D | 189 | -30.007 | 50.049 | -23.463 | 1.00 | 60.18 | O |
| ATOM | 4471 | CB  | PHE | D | 189 | -29.478 | 48.662 | -26.118 | 1.00 | 54.77 | C |
| ATOM | 4472 | CG  | PHE | D | 189 | -29.685 | 47.184 | -25.904 | 1.00 | 55.88 | C |
| ATOM | 4473 | CD1 | PHE | D | 189 | -29.563 | 46.626 | -24.639 | 1.00 | 54.07 | C |
| ATOM | 4474 | CD2 | PHE | D | 189 | -30.022 | 46.355 | -26.960 | 1.00 | 57.20 | C |
| ATOM | 4475 | CE1 | PHE | D | 189 | -29.767 | 45.273 | -24.429 | 1.00 | 51.69 | C |
| ATOM | 4476 | CE2 | PHE | D | 189 | -30.255 | 45.006 | -26.743 | 1.00 | 57.24 | C |
| ATOM | 4477 | CZ  | PHE | D | 189 | -30.125 | 44.469 | -25.481 | 1.00 | 56.20 | C |
| ATOM | 4478 | N   | TYR | D | 190 | -31.933 | 48.881 | -23.689 | 1.00 | 48.58 | N |
| ATOM | 4479 | CA  | TYR | D | 190 | -32.267 | 48.815 | -22.277 | 1.00 | 48.17 | C |
| ATOM | 4480 | C   | TYR | D | 190 | -32.619 | 47.371 | -21.909 | 1.00 | 48.23 | C |
| ATOM | 4481 | O   | TYR | D | 190 | -33.735 | 46.970 | -22.047 | 1.00 | 49.12 | O |
| ATOM | 4482 | CB  | TYR | D | 190 | -33.453 | 49.734 | -21.943 | 1.00 | 50.89 | C |
| ATOM | 4483 | CG  | TYR | D | 190 | -33.319 | 51.170 | -22.387 | 1.00 | 50.06 | C |
| ATOM | 4484 | CD1 | TYR | D | 190 | -33.432 | 51.507 | -23.721 | 1.00 | 52.28 | C |
| ATOM | 4485 | CD2 | TYR | D | 190 | -33.093 | 52.192 | -21.484 | 1.00 | 52.04 | C |
| ATOM | 4486 | CE1 | TYR | D | 190 | -33.289 | 52.817 | -24.152 | 1.00 | 55.54 | C |
| ATOM | 4487 | CE2 | TYR | D | 190 | -32.957 | 53.509 | -21.895 | 1.00 | 51.25 | C |
| ATOM | 4488 | CZ  | TYR | D | 190 | -33.048 | 53.819 | -23.237 | 1.00 | 52.23 | C |
| ATOM | 4489 | OH  | TYR | D | 190 | -32.902 | 55.097 | -23.690 | 1.00 | 56.05 | O |
| ATOM | 4490 | N   | MET | D | 191 | -31.677 | 46.597 | -21.374 | 1.00 | 50.90 | N |
| ATOM | 4491 | CA  | MET | D | 191 | -31.974 | 45.180 | -21.174 | 1.00 | 51.84 | C |
| ATOM | 4492 | C   | MET | D | 191 | -33.196 | 45.024 | -20.272 | 1.00 | 52.11 | C |
| ATOM | 4493 | O   | MET | D | 191 | -34.187 | 44.463 | -20.678 | 1.00 | 60.26 | O |
| ATOM | 4494 | CB  | MET | D | 191 | -30.808 | 44.404 | -20.565 | 1.00 | 51.26 | C |

|      |      |     |     |   |     |         |        |         |      |       |     |
|------|------|-----|-----|---|-----|---------|--------|---------|------|-------|-----|
| ATOM | 4495 | CG  | MET | D | 191 | -30.886 | 42.910 | -20.807 | 1.00 | 47.56 | C   |
| ATOM | 4496 | SD  | MET | D | 191 | -29.572 | 42.105 | -19.886 | 1.00 | 48.23 | S   |
| ATOM | 4497 | CE  | MET | D | 191 | -29.773 | 40.378 | -20.321 | 1.00 | 51.28 | C   |
| ATOM | 4498 | N   | ASP | D | 192 | -33.100 | 45.520 | -19.043 | 1.00 | 58.22 | N   |
| ATOM | 4499 | CA  | ASP | D | 192 | -34.085 | 45.224 | -18.007 | 1.00 | 54.24 | C   |
| ATOM | 4500 | C   | ASP | D | 192 | -35.461 | 45.810 | -18.388 | 1.00 | 59.41 | C   |
| ATOM | 4501 | O   | ASP | D | 192 | -36.489 | 45.136 | -18.273 | 1.00 | 54.72 | O   |
| ATOM | 4502 | CB  | ASP | D | 192 | -33.535 | 45.666 | -16.652 | 1.00 | 50.39 | C   |
| ATOM | 4503 | CG  | ASP | D | 192 | -32.494 | 44.705 | -16.093 | 1.00 | 52.60 | C   |
| ATOM | 4504 | OD1 | ASP | D | 192 | -31.977 | 43.862 | -16.865 | 1.00 | 48.48 | O   |
| ATOM | 4505 | OD2 | ASP | D | 192 | -32.245 | 44.770 | -14.870 | 1.00 | 57.15 | O1- |
| ATOM | 4506 | N   | LYS | D | 193 | -35.484 | 47.043 | -18.906 | 1.00 | 63.96 | N   |
| ATOM | 4507 | CA  | LYS | D | 193 | -36.746 | 47.724 | -19.214 | 1.00 | 67.21 | C   |
| ATOM | 4508 | C   | LYS | D | 193 | -37.480 | 47.027 | -20.378 | 1.00 | 62.27 | C   |
| ATOM | 4509 | O   | LYS | D | 193 | -38.702 | 47.006 | -20.414 | 1.00 | 51.06 | O   |
| ATOM | 4510 | CB  | LYS | D | 193 | -36.517 | 49.223 | -19.459 | 1.00 | 69.09 | C   |
| ATOM | 4511 | CG  | LYS | D | 193 | -37.130 | 50.116 | -18.383 | 1.00 | 75.92 | C   |
| ATOM | 4512 | CD  | LYS | D | 193 | -36.156 | 50.976 | -17.622 | 1.00 | 81.65 | C   |
| ATOM | 4513 | CE  | LYS | D | 193 | -36.289 | 50.779 | -16.127 | 1.00 | 85.86 | C   |
| ATOM | 4514 | NZ  | LYS | D | 193 | -35.333 | 51.632 | -15.389 | 1.00 | 88.28 | N1+ |
| ATOM | 4515 | N   | TRP | D | 194 | -36.729 | 46.416 | -21.297 | 1.00 | 57.27 | N   |
| ATOM | 4516 | CA  | TRP | D | 194 | -37.289 | 45.702 | -22.438 | 1.00 | 45.22 | C   |
| ATOM | 4517 | C   | TRP | D | 194 | -37.496 | 44.228 | -22.088 | 1.00 | 45.24 | C   |
| ATOM | 4518 | O   | TRP | D | 194 | -37.683 | 43.412 | -22.974 | 1.00 | 50.13 | O   |
| ATOM | 4519 | CB  | TRP | D | 194 | -36.389 | 45.880 | -23.665 | 1.00 | 40.68 | C   |
| ATOM | 4520 | CG  | TRP | D | 194 | -36.345 | 47.280 | -24.184 | 1.00 | 38.05 | C   |
| ATOM | 4521 | CD1 | TRP | D | 194 | -37.113 | 48.328 | -23.767 | 1.00 | 40.16 | C   |
| ATOM | 4522 | CD2 | TRP | D | 194 | -35.532 | 47.776 | -25.265 | 1.00 | 44.99 | C   |
| ATOM | 4523 | CE2 | TRP | D | 194 | -35.833 | 49.154 | -25.407 | 1.00 | 46.87 | C   |
| ATOM | 4524 | CE3 | TRP | D | 194 | -34.543 | 47.215 | -26.089 | 1.00 | 46.90 | C   |
| ATOM | 4525 | NE1 | TRP | D | 194 | -36.811 | 49.457 | -24.487 | 1.00 | 46.74 | N   |
| ATOM | 4526 | CZ2 | TRP | D | 194 | -35.199 | 49.963 | -26.354 | 1.00 | 45.69 | C   |
| ATOM | 4527 | CZ3 | TRP | D | 194 | -33.909 | 48.018 | -27.020 | 1.00 | 46.83 | C   |

|      |      |     |     |   |     |         |        |         |      |       |     |
|------|------|-----|-----|---|-----|---------|--------|---------|------|-------|-----|
| ATOM | 4528 | CH2 | TRP | D | 194 | -34.252 | 49.368 | -27.166 | 1.00 | 47.54 | C   |
| ATOM | 4529 | N   | GLU | D | 195 | -37.476 | 43.911 | -20.788 | 1.00 | 52.51 | N   |
| ATOM | 4530 | CA  | GLU | D | 195 | -37.728 | 42.573 | -20.250 | 1.00 | 54.73 | C   |
| ATOM | 4531 | C   | GLU | D | 195 | -37.018 | 41.507 | -21.110 | 1.00 | 58.31 | C   |
| ATOM | 4532 | O   | GLU | D | 195 | -37.635 | 40.521 | -21.514 | 1.00 | 60.66 | O   |
| ATOM | 4533 | CB  | GLU | D | 195 | -39.242 | 42.394 | -20.140 | 1.00 | 61.27 | C   |
| ATOM | 4534 | CG  | GLU | D | 195 | -39.871 | 43.039 | -18.911 | 1.00 | 64.98 | C   |
| ATOM | 4535 | CD  | GLU | D | 195 | -41.345 | 42.689 | -18.694 | 1.00 | 75.19 | C   |
| ATOM | 4536 | OE1 | GLU | D | 195 | -41.719 | 41.480 | -18.828 | 1.00 | 69.11 | O   |
| ATOM | 4537 | OE2 | GLU | D | 195 | -42.137 | 43.623 | -18.402 | 1.00 | 68.76 | O1- |
| ATOM | 4538 | N   | ILE | D | 196 | -35.713 | 41.712 | -21.376 | 1.00 | 56.06 | N   |
| ATOM | 4539 | CA  | ILE | D | 196 | -34.843 | 40.774 | -22.105 | 1.00 | 49.88 | C   |
| ATOM | 4540 | C   | ILE | D | 196 | -34.162 | 39.855 | -21.080 | 1.00 | 50.44 | C   |
| ATOM | 4541 | O   | ILE | D | 196 | -33.804 | 40.300 | -20.014 | 1.00 | 53.87 | O   |
| ATOM | 4542 | CB  | ILE | D | 196 | -33.803 | 41.519 | -22.965 | 1.00 | 49.24 | C   |
| ATOM | 4543 | CG1 | ILE | D | 196 | -34.440 | 42.382 | -24.057 | 1.00 | 50.04 | C   |
| ATOM | 4544 | CG2 | ILE | D | 196 | -32.794 | 40.543 | -23.558 | 1.00 | 52.72 | C   |
| ATOM | 4545 | CD1 | ILE | D | 196 | -33.478 | 43.347 | -24.723 | 1.00 | 45.98 | C   |
| ATOM | 4546 | N   | ASP | D | 197 | -33.974 | 38.579 | -21.436 | 1.00 | 48.52 | N   |
| ATOM | 4547 | CA  | ASP | D | 197 | -33.525 | 37.549 | -20.516 | 1.00 | 46.34 | C   |
| ATOM | 4548 | C   | ASP | D | 197 | -32.092 | 37.086 | -20.836 | 1.00 | 47.14 | C   |
| ATOM | 4549 | O   | ASP | D | 197 | -31.439 | 36.513 | -19.969 | 1.00 | 46.15 | O   |
| ATOM | 4550 | CB  | ASP | D | 197 | -34.483 | 36.360 | -20.537 | 1.00 | 49.39 | C   |
| ATOM | 4551 | CG  | ASP | D | 197 | -35.851 | 36.653 | -19.943 | 1.00 | 54.49 | C   |
| ATOM | 4552 | OD1 | ASP | D | 197 | -35.979 | 36.668 | -18.690 | 1.00 | 52.94 | O   |
| ATOM | 4553 | OD2 | ASP | D | 197 | -36.788 | 36.844 | -20.741 | 1.00 | 61.27 | O1- |
| ATOM | 4554 | N   | GLY | D | 198 | -31.628 | 37.287 | -22.082 | 1.00 | 46.57 | N   |
| ATOM | 4555 | CA  | GLY | D | 198 | -30.291 | 36.907 | -22.538 | 1.00 | 40.66 | C   |
| ATOM | 4556 | C   | GLY | D | 198 | -29.786 | 37.898 | -23.566 | 1.00 | 46.67 | C   |
| ATOM | 4557 | O   | GLY | D | 198 | -30.561 | 38.360 | -24.402 | 1.00 | 52.31 | O   |
| ATOM | 4558 | N   | VAL | D | 199 | -28.504 | 38.269 | -23.473 | 1.00 | 47.62 | N   |
| ATOM | 4559 | CA  | VAL | D | 199 | -27.920 | 39.228 | -24.394 | 1.00 | 48.75 | C   |
| ATOM | 4560 | C   | VAL | D | 199 | -26.422 | 38.965 | -24.515 | 1.00 | 47.49 | C   |



|      |      |     |     |   |     |         |        |         |      |       |   |
|------|------|-----|-----|---|-----|---------|--------|---------|------|-------|---|
| ATOM | 4561 | O   | VAL | D | 199 | -25.788 | 38.462 | -23.570 | 1.00 | 43.28 | O |
| ATOM | 4562 | CB  | VAL | D | 199 | -28.186 | 40.684 | -23.963 | 1.00 | 58.68 | C |
| ATOM | 4563 | CG1 | VAL | D | 199 | -27.349 | 41.086 | -22.762 | 1.00 | 57.53 | C |
| ATOM | 4564 | CG2 | VAL | D | 199 | -27.966 | 41.660 | -25.116 | 1.00 | 58.98 | C |
| ATOM | 4565 | N   | TYR | D | 200 | -25.884 | 39.281 | -25.699 | 1.00 | 42.35 | N |
| ATOM | 4566 | CA  | TYR | D | 200 | -24.472 | 39.244 | -25.933 | 1.00 | 43.75 | C |
| ATOM | 4567 | C   | TYR | D | 200 | -24.141 | 40.330 | -26.953 | 1.00 | 46.53 | C |
| ATOM | 4568 | O   | TYR | D | 200 | -25.014 | 40.761 | -27.694 | 1.00 | 49.69 | O |
| ATOM | 4569 | CB  | TYR | D | 200 | -24.017 | 37.841 | -26.336 | 1.00 | 47.57 | C |
| ATOM | 4570 | CG  | TYR | D | 200 | -24.529 | 37.337 | -27.664 | 1.00 | 48.88 | C |
| ATOM | 4571 | CD1 | TYR | D | 200 | -25.709 | 36.624 | -27.743 | 1.00 | 46.75 | C |
| ATOM | 4572 | CD2 | TYR | D | 200 | -23.821 | 37.546 | -28.840 | 1.00 | 47.13 | C |
| ATOM | 4573 | CE1 | TYR | D | 200 | -26.189 | 36.154 | -28.954 | 1.00 | 47.51 | C |
| ATOM | 4574 | CE2 | TYR | D | 200 | -24.294 | 37.090 | -30.059 | 1.00 | 46.41 | C |
| ATOM | 4575 | CZ  | TYR | D | 200 | -25.488 | 36.391 | -30.119 | 1.00 | 44.53 | C |
| ATOM | 4576 | OH  | TYR | D | 200 | -25.979 | 35.931 | -31.309 | 1.00 | 40.40 | O |
| ATOM | 4577 | N   | THR | D | 201 | -22.888 | 40.804 | -26.933 | 1.00 | 47.40 | N |
| ATOM | 4578 | CA  | THR | D | 201 | -22.372 | 41.699 | -27.961 | 1.00 | 42.53 | C |
| ATOM | 4579 | C   | THR | D | 201 | -20.968 | 41.222 | -28.304 | 1.00 | 37.84 | C |
| ATOM | 4580 | O   | THR | D | 201 | -20.501 | 40.252 | -27.743 | 1.00 | 38.50 | O |
| ATOM | 4581 | CB  | THR | D | 201 | -22.447 | 43.170 | -27.527 | 1.00 | 41.13 | C |
| ATOM | 4582 | CG2 | THR | D | 201 | -21.583 | 43.468 | -26.326 | 1.00 | 44.54 | C |
| ATOM | 4583 | OG1 | THR | D | 201 | -22.014 | 43.975 | -28.622 | 1.00 | 41.05 | O |
| ATOM | 4584 | N   | GLY | D | 202 | -20.313 | 41.948 | -29.202 | 1.00 | 40.51 | N |
| ATOM | 4585 | CA  | GLY | D | 202 | -18.974 | 41.636 | -29.686 | 1.00 | 44.07 | C |
| ATOM | 4586 | C   | GLY | D | 202 | -17.996 | 42.785 | -29.450 | 1.00 | 48.85 | C |
| ATOM | 4587 | O   | GLY | D | 202 | -18.360 | 43.965 | -29.476 | 1.00 | 46.46 | O |
| ATOM | 4588 | N   | SER | D | 203 | -16.728 | 42.411 | -29.237 | 1.00 | 50.79 | N |
| ATOM | 4589 | CA  | SER | D | 203 | -15.689 | 43.313 | -28.801 | 1.00 | 47.75 | C |
| ATOM | 4590 | C   | SER | D | 203 | -15.193 | 44.156 | -29.978 | 1.00 | 48.76 | C |
| ATOM | 4591 | O   | SER | D | 203 | -14.774 | 45.320 | -29.785 | 1.00 | 44.92 | O |
| ATOM | 4592 | CB  | SER | D | 203 | -14.560 | 42.554 | -28.121 | 1.00 | 46.00 | C |
| ATOM | 4593 | OG  | SER | D | 203 | -13.900 | 41.634 | -28.983 | 1.00 | 36.10 | O |

|      |      |     |     |   |     |         |        |         |      |       |     |
|------|------|-----|-----|---|-----|---------|--------|---------|------|-------|-----|
| ATOM | 4594 | N   | GLN | D | 204 | -15.270 | 43.581 | -31.188 | 1.00 | 45.32 | N   |
| ATOM | 4595 | CA  | GLN | D | 204 | -14.563 | 44.137 | -32.324 | 1.00 | 46.46 | C   |
| ATOM | 4596 | C   | GLN | D | 204 | -15.507 | 45.031 | -33.140 | 1.00 | 46.97 | C   |
| ATOM | 4597 | O   | GLN | D | 204 | -15.102 | 45.533 | -34.204 | 1.00 | 44.58 | O   |
| ATOM | 4598 | CB  | GLN | D | 204 | -13.890 | 43.022 | -33.138 | 1.00 | 50.64 | C   |
| ATOM | 4599 | CG  | GLN | D | 204 | -14.816 | 42.239 | -34.071 | 1.00 | 55.59 | C   |
| ATOM | 4600 | CD  | GLN | D | 204 | -15.500 | 41.041 | -33.448 | 1.00 | 54.37 | C   |
| ATOM | 4601 | NE2 | GLN | D | 204 | -16.106 | 40.216 | -34.294 | 1.00 | 45.08 | N   |
| ATOM | 4602 | OE1 | GLN | D | 204 | -15.512 | 40.870 | -32.224 | 1.00 | 55.21 | O   |
| ATOM | 4603 | N   | LYS | D | 205 | -16.726 | 45.267 | -32.631 | 1.00 | 41.22 | N   |
| ATOM | 4604 | CA  | LYS | D | 205 | -17.728 | 45.977 | -33.383 | 1.00 | 46.92 | C   |
| ATOM | 4605 | C   | LYS | D | 205 | -17.760 | 47.400 | -32.814 | 1.00 | 50.23 | C   |
| ATOM | 4606 | O   | LYS | D | 205 | -16.706 | 48.066 | -32.791 | 1.00 | 47.19 | O   |
| ATOM | 4607 | CB  | LYS | D | 205 | -19.038 | 45.168 | -33.453 | 1.00 | 55.01 | C   |
| ATOM | 4608 | CG  | LYS | D | 205 | -18.908 | 43.752 | -34.063 | 1.00 | 64.49 | C   |
| ATOM | 4609 | CD  | LYS | D | 205 | -19.463 | 43.490 | -35.488 | 1.00 | 63.69 | C   |
| ATOM | 4610 | CE  | LYS | D | 205 | -18.783 | 42.360 | -36.268 | 1.00 | 64.81 | C   |
| ATOM | 4611 | NZ  | LYS | D | 205 | -19.629 | 41.147 | -36.486 | 1.00 | 69.61 | N1+ |
| ATOM | 4612 | N   | VAL | D | 206 | -18.918 | 47.877 | -32.343 | 1.00 | 48.24 | N   |
| ATOM | 4613 | CA  | VAL | D | 206 | -19.027 | 49.298 | -31.969 | 1.00 | 49.52 | C   |
| ATOM | 4614 | C   | VAL | D | 206 | -17.955 | 49.651 | -30.920 | 1.00 | 48.41 | C   |
| ATOM | 4615 | O   | VAL | D | 206 | -17.363 | 50.747 | -30.961 | 1.00 | 50.38 | O   |
| ATOM | 4616 | CB  | VAL | D | 206 | -20.444 | 49.680 | -31.495 | 1.00 | 51.65 | C   |
| ATOM | 4617 | CG1 | VAL | D | 206 | -20.547 | 51.163 | -31.203 | 1.00 | 53.09 | C   |
| ATOM | 4618 | CG2 | VAL | D | 206 | -21.517 | 49.282 | -32.494 | 1.00 | 53.41 | C   |
| ATOM | 4619 | N   | LEU | D | 207 | -17.688 | 48.733 | -29.984 | 1.00 | 47.07 | N   |
| ATOM | 4620 | CA  | LEU | D | 207 | -16.781 | 49.009 | -28.848 | 1.00 | 48.17 | C   |
| ATOM | 4621 | C   | LEU | D | 207 | -15.359 | 49.405 | -29.296 | 1.00 | 45.39 | C   |
| ATOM | 4622 | O   | LEU | D | 207 | -14.664 | 50.093 | -28.574 | 1.00 | 45.89 | O   |
| ATOM | 4623 | CB  | LEU | D | 207 | -16.757 | 47.772 | -27.947 | 1.00 | 48.01 | C   |
| ATOM | 4624 | CG  | LEU | D | 207 | -17.908 | 47.722 | -26.947 | 1.00 | 49.75 | C   |
| ATOM | 4625 | CD1 | LEU | D | 207 | -18.066 | 46.345 | -26.311 | 1.00 | 51.05 | C   |
| ATOM | 4626 | CD2 | LEU | D | 207 | -17.685 | 48.781 | -25.888 | 1.00 | 55.46 | C   |

|      |      |     |     |   |     |         |        |         |      |       |   |
|------|------|-----|-----|---|-----|---------|--------|---------|------|-------|---|
| ATOM | 4627 | N   | GLY | D | 208 | -14.922 | 48.962 | -30.473 | 1.00 | 41.48 | N |
| ATOM | 4628 | CA  | GLY | D | 208 | -13.607 | 49.249 | -30.957 | 1.00 | 39.18 | C |
| ATOM | 4629 | C   | GLY | D | 208 | -12.542 | 48.575 | -30.121 | 1.00 | 41.70 | C |
| ATOM | 4630 | O   | GLY | D | 208 | -11.475 | 49.166 | -29.880 | 1.00 | 45.74 | O |
| ATOM | 4631 | N   | ALA | D | 209 | -12.836 | 47.354 | -29.657 | 1.00 | 40.98 | N |
| ATOM | 4632 | CA  | ALA | D | 209 | -11.839 | 46.533 | -28.965 | 1.00 | 43.48 | C |
| ATOM | 4633 | C   | ALA | D | 209 | -11.392 | 45.388 | -29.876 | 1.00 | 42.74 | C |
| ATOM | 4634 | O   | ALA | D | 209 | -12.000 | 45.132 | -30.910 | 1.00 | 48.58 | O |
| ATOM | 4635 | CB  | ALA | D | 209 | -12.384 | 46.053 | -27.646 | 1.00 | 38.74 | C |
| ATOM | 4636 | N   | PRO | D | 210 | -10.267 | 44.715 | -29.581 | 1.00 | 40.38 | N |
| ATOM | 4637 | CA  | PRO | D | 210 | -9.821  | 43.584 | -30.382 | 1.00 | 41.08 | C |
| ATOM | 4638 | C   | PRO | D | 210 | -10.748 | 42.391 | -30.222 | 1.00 | 40.22 | C |
| ATOM | 4639 | O   | PRO | D | 210 | -11.346 | 42.192 | -29.154 | 1.00 | 38.57 | O |
| ATOM | 4640 | CB  | PRO | D | 210 | -8.420  | 43.264 | -29.852 | 1.00 | 38.22 | C |
| ATOM | 4641 | CG  | PRO | D | 210 | -7.997  | 44.563 | -29.229 | 1.00 | 39.61 | C |
| ATOM | 4642 | CD  | PRO | D | 210 | -9.267  | 45.082 | -28.578 | 1.00 | 43.27 | C |
| ATOM | 4643 | N   | PRO | D | 211 | -10.886 | 41.592 | -31.307 | 1.00 | 38.81 | N |
| ATOM | 4644 | CA  | PRO | D | 211 | -11.732 | 40.397 | -31.291 | 1.00 | 40.09 | C |
| ATOM | 4645 | C   | PRO | D | 211 | -11.155 | 39.333 | -30.352 | 1.00 | 34.77 | C |
| ATOM | 4646 | O   | PRO | D | 211 | -9.920  | 39.254 | -30.278 | 1.00 | 37.17 | O |
| ATOM | 4647 | CB  | PRO | D | 211 | -11.651 | 39.902 | -32.740 | 1.00 | 40.22 | C |
| ATOM | 4648 | CG  | PRO | D | 211 | -10.283 | 40.371 | -33.179 | 1.00 | 38.97 | C |
| ATOM | 4649 | CD  | PRO | D | 211 | -10.190 | 41.759 | -32.590 | 1.00 | 38.19 | C |
| ATOM | 4650 | N   | GLY | D | 212 | -12.030 | 38.549 | -29.694 | 1.00 | 30.91 | N |
| ATOM | 4651 | CA  | GLY | D | 212 | -11.633 | 37.327 | -28.963 | 1.00 | 31.68 | C |
| ATOM | 4652 | C   | GLY | D | 212 | -12.224 | 37.181 | -27.559 | 1.00 | 30.18 | C |
| ATOM | 4653 | O   | GLY | D | 212 | -11.978 | 36.196 | -26.895 | 1.00 | 28.08 | O |
| ATOM | 4654 | N   | ILE | D | 213 | -13.003 | 38.157 | -27.105 | 1.00 | 33.19 | N |
| ATOM | 4655 | CA  | ILE | D | 213 | -13.592 | 38.180 | -25.751 | 1.00 | 36.13 | C |
| ATOM | 4656 | C   | ILE | D | 213 | -15.028 | 38.697 | -25.896 | 1.00 | 36.26 | C |
| ATOM | 4657 | O   | ILE | D | 213 | -15.219 | 39.737 | -26.530 | 1.00 | 36.24 | O |
| ATOM | 4658 | CB  | ILE | D | 213 | -12.730 | 39.037 | -24.786 | 1.00 | 34.45 | C |
| ATOM | 4659 | CG1 | ILE | D | 213 | -13.293 | 39.105 | -23.365 | 1.00 | 34.92 | C |

|      |      |     |     |   |     |         |        |         |      |       |   |
|------|------|-----|-----|---|-----|---------|--------|---------|------|-------|---|
| ATOM | 4660 | CG2 | ILE | D | 213 | -12.521 | 40.442 | -25.324 | 1.00 | 33.51 | C |
| ATOM | 4661 | CD1 | ILE | D | 213 | -13.310 | 37.782 | -22.651 | 1.00 | 37.53 | C |
| ATOM | 4662 | N   | THR | D | 214 | -16.003 | 37.966 | -25.337 | 1.00 | 37.76 | N |
| ATOM | 4663 | CA  | THR | D | 214 | -17.417 | 38.158 | -25.683 | 1.00 | 41.27 | C |
| ATOM | 4664 | C   | THR | D | 214 | -18.292 | 38.386 | -24.445 | 1.00 | 38.99 | C |
| ATOM | 4665 | O   | THR | D | 214 | -18.656 | 37.459 | -23.718 | 1.00 | 39.18 | O |
| ATOM | 4666 | CB  | THR | D | 214 | -17.938 | 36.977 | -26.509 | 1.00 | 45.19 | C |
| ATOM | 4667 | CG2 | THR | D | 214 | -19.431 | 37.043 | -26.744 | 1.00 | 45.52 | C |
| ATOM | 4668 | OG1 | THR | D | 214 | -17.276 | 37.017 | -27.772 | 1.00 | 45.33 | O |
| ATOM | 4669 | N   | PRO | D | 215 | -18.718 | 39.644 | -24.208 | 1.00 | 35.50 | N |
| ATOM | 4670 | CA  | PRO | D | 215 | -19.656 | 39.962 | -23.138 | 1.00 | 37.27 | C |
| ATOM | 4671 | C   | PRO | D | 215 | -21.006 | 39.239 | -23.235 | 1.00 | 40.49 | C |
| ATOM | 4672 | O   | PRO | D | 215 | -21.503 | 39.024 | -24.347 | 1.00 | 38.83 | O |
| ATOM | 4673 | CB  | PRO | D | 215 | -19.923 | 41.459 | -23.333 | 1.00 | 37.16 | C |
| ATOM | 4674 | CG  | PRO | D | 215 | -18.718 | 41.977 | -24.060 | 1.00 | 36.57 | C |
| ATOM | 4675 | CD  | PRO | D | 215 | -18.275 | 40.836 | -24.938 | 1.00 | 36.26 | C |
| ATOM | 4676 | N   | ILE | D | 216 | -21.598 | 38.947 | -22.061 | 1.00 | 45.85 | N |
| ATOM | 4677 | CA  | ILE | D | 216 | -22.886 | 38.233 | -21.924 | 1.00 | 44.24 | C |
| ATOM | 4678 | C   | ILE | D | 216 | -23.514 | 38.570 | -20.569 | 1.00 | 45.62 | C |
| ATOM | 4679 | O   | ILE | D | 216 | -22.819 | 38.754 | -19.579 | 1.00 | 47.23 | O |
| ATOM | 4680 | CB  | ILE | D | 216 | -22.694 | 36.714 | -22.122 | 1.00 | 43.59 | C |
| ATOM | 4681 | CG1 | ILE | D | 216 | -24.004 | 35.942 | -22.209 | 1.00 | 43.81 | C |
| ATOM | 4682 | CG2 | ILE | D | 216 | -21.798 | 36.110 | -21.067 | 1.00 | 44.05 | C |
| ATOM | 4683 | CD1 | ILE | D | 216 | -23.794 | 34.512 | -22.656 | 1.00 | 45.51 | C |
| ATOM | 4684 | N   | SER | D | 217 | -24.847 | 38.674 | -20.562 | 1.00 | 47.65 | N |
| ATOM | 4685 | CA  | SER | D | 217 | -25.641 | 38.854 | -19.359 | 1.00 | 46.31 | C |
| ATOM | 4686 | C   | SER | D | 217 | -26.938 | 38.045 | -19.494 | 1.00 | 47.24 | C |
| ATOM | 4687 | O   | SER | D | 217 | -27.497 | 37.943 | -20.575 | 1.00 | 46.75 | O |
| ATOM | 4688 | CB  | SER | D | 217 | -25.916 | 40.313 | -19.120 | 1.00 | 44.08 | C |
| ATOM | 4689 | OG  | SER | D | 217 | -26.654 | 40.476 | -17.918 | 1.00 | 45.54 | O |
| ATOM | 4690 | N   | ILE | D | 218 | -27.394 | 37.450 | -18.391 | 1.00 | 48.14 | N |
| ATOM | 4691 | CA  | ILE | D | 218 | -28.677 | 36.773 | -18.366 | 1.00 | 50.66 | C |
| ATOM | 4692 | C   | ILE | D | 218 | -29.453 | 37.197 | -17.116 | 1.00 | 53.72 | C |

|      |      |     |     |   |     |         |        |         |      |       |     |
|------|------|-----|-----|---|-----|---------|--------|---------|------|-------|-----|
| ATOM | 4693 | O   | ILE | D | 218 | -28.860 | 37.477 | -16.063 | 1.00 | 54.26 | O   |
| ATOM | 4694 | CB  | ILE | D | 218 | -28.518 | 35.241 | -18.440 | 1.00 | 56.45 | C   |
| ATOM | 4695 | CG1 | ILE | D | 218 | -27.994 | 34.666 | -17.114 | 1.00 | 53.18 | C   |
| ATOM | 4696 | CG2 | ILE | D | 218 | -27.671 | 34.841 | -19.658 | 1.00 | 51.05 | C   |
| ATOM | 4697 | CD1 | ILE | D | 218 | -28.118 | 33.170 | -16.997 | 1.00 | 52.75 | C   |
| ATOM | 4698 | N   | SER | D | 219 | -30.785 | 37.192 | -17.249 | 1.00 | 54.09 | N   |
| ATOM | 4699 | CA  | SER | D | 219 | -31.718 | 37.615 | -16.212 | 1.00 | 54.90 | C   |
| ATOM | 4700 | C   | SER | D | 219 | -31.821 | 36.552 | -15.129 | 1.00 | 47.61 | C   |
| ATOM | 4701 | O   | SER | D | 219 | -31.511 | 35.384 | -15.368 | 1.00 | 52.64 | O   |
| ATOM | 4702 | CB  | SER | D | 219 | -33.084 | 37.884 | -16.789 | 1.00 | 64.06 | C   |
| ATOM | 4703 | OG  | SER | D | 219 | -33.785 | 36.662 | -17.015 | 1.00 | 78.00 | O   |
| ATOM | 4704 | N   | PRO | D | 220 | -32.305 | 36.923 | -13.923 | 1.00 | 46.13 | N   |
| ATOM | 4705 | CA  | PRO | D | 220 | -32.640 | 35.961 | -12.869 | 1.00 | 46.98 | C   |
| ATOM | 4706 | C   | PRO | D | 220 | -33.460 | 34.752 | -13.339 | 1.00 | 53.60 | C   |
| ATOM | 4707 | O   | PRO | D | 220 | -33.151 | 33.631 | -12.942 | 1.00 | 61.22 | O   |
| ATOM | 4708 | CB  | PRO | D | 220 | -33.471 | 36.797 | -11.885 | 1.00 | 44.28 | C   |
| ATOM | 4709 | CG  | PRO | D | 220 | -32.883 | 38.176 | -12.018 | 1.00 | 45.49 | C   |
| ATOM | 4710 | CD  | PRO | D | 220 | -32.517 | 38.312 | -13.487 | 1.00 | 47.25 | C   |
| ATOM | 4711 | N   | LYS | D | 221 | -34.489 | 34.994 | -14.165 | 1.00 | 60.65 | N   |
| ATOM | 4712 | CA  | LYS | D | 221 | -35.333 | 33.921 | -14.720 | 1.00 | 66.18 | C   |
| ATOM | 4713 | C   | LYS | D | 221 | -34.474 | 32.946 | -15.535 | 1.00 | 63.50 | C   |
| ATOM | 4714 | O   | LYS | D | 221 | -34.540 | 31.723 | -15.345 | 1.00 | 61.18 | O   |
| ATOM | 4715 | CB  | LYS | D | 221 | -36.450 | 34.508 | -15.586 | 1.00 | 72.14 | C   |
| ATOM | 4716 | CG  | LYS | D | 221 | -37.573 | 35.165 | -14.797 | 1.00 | 80.80 | C   |
| ATOM | 4717 | CD  | LYS | D | 221 | -38.518 | 36.010 | -15.631 | 1.00 | 82.53 | C   |
| ATOM | 4718 | CE  | LYS | D | 221 | -39.726 | 36.468 | -14.842 | 1.00 | 82.89 | C   |
| ATOM | 4719 | NZ  | LYS | D | 221 | -40.783 | 36.998 | -15.732 | 1.00 | 85.21 | N1+ |
| ATOM | 4720 | N   | ALA | D | 222 | -33.663 | 33.496 | -16.439 | 1.00 | 57.48 | N   |
| ATOM | 4721 | CA  | ALA | D | 222 | -32.866 | 32.681 | -17.343 | 1.00 | 57.28 | C   |
| ATOM | 4722 | C   | ALA | D | 222 | -31.946 | 31.761 | -16.534 | 1.00 | 57.71 | C   |
| ATOM | 4723 | O   | ALA | D | 222 | -31.824 | 30.574 | -16.836 | 1.00 | 60.91 | O   |
| ATOM | 4724 | CB  | ALA | D | 222 | -32.102 | 33.577 | -18.283 | 1.00 | 57.69 | C   |
| ATOM | 4725 | N   | LEU | D | 223 | -31.312 | 32.329 | -15.502 | 1.00 | 60.54 | N   |

|      |      |     |     |   |     |         |        |         |      |       |     |
|------|------|-----|-----|---|-----|---------|--------|---------|------|-------|-----|
| ATOM | 4726 | CA  | LEU | D | 223 | -30.418 | 31.601 | -14.585 | 1.00 | 60.32 | C   |
| ATOM | 4727 | C   | LEU | D | 223 | -31.161 | 30.405 | -13.967 | 1.00 | 57.67 | C   |
| ATOM | 4728 | O   | LEU | D | 223 | -30.591 | 29.298 | -13.866 | 1.00 | 52.27 | O   |
| ATOM | 4729 | CB  | LEU | D | 223 | -29.929 | 32.576 | -13.501 | 1.00 | 60.20 | C   |
| ATOM | 4730 | CG  | LEU | D | 223 | -29.010 | 32.006 | -12.413 | 1.00 | 56.76 | C   |
| ATOM | 4731 | CD1 | LEU | D | 223 | -27.803 | 31.327 | -13.024 | 1.00 | 59.50 | C   |
| ATOM | 4732 | CD2 | LEU | D | 223 | -28.545 | 33.092 | -11.456 | 1.00 | 55.55 | C   |
| ATOM | 4733 | N   | GLU | D | 224 | -32.414 | 30.640 | -13.538 | 1.00 | 62.31 | N   |
| ATOM | 4734 | CA  | GLU | D | 224 | -33.220 | 29.637 | -12.801 | 1.00 | 66.28 | C   |
| ATOM | 4735 | C   | GLU | D | 224 | -33.601 | 28.481 | -13.741 | 1.00 | 61.33 | C   |
| ATOM | 4736 | O   | GLU | D | 224 | -33.585 | 27.305 | -13.330 | 1.00 | 59.71 | O   |
| ATOM | 4737 | CB  | GLU | D | 224 | -34.461 | 30.264 | -12.157 | 1.00 | 71.45 | C   |
| ATOM | 4738 | CG  | GLU | D | 224 | -34.608 | 29.918 | -10.674 | 1.00 | 84.51 | C   |
| ATOM | 4739 | CD  | GLU | D | 224 | -35.914 | 29.253 | -10.238 | 1.00 | 88.52 | C   |
| ATOM | 4740 | OE1 | GLU | D | 224 | -35.842 | 28.339 | -9.381  | 1.00 | 83.65 | O   |
| ATOM | 4741 | OE2 | GLU | D | 224 | -37.002 | 29.651 | -10.734 | 1.00 | 84.30 | O1- |
| ATOM | 4742 | N   | VAL | D | 225 | -33.907 | 28.814 | -15.003 | 1.00 | 58.98 | N   |
| ATOM | 4743 | CA  | VAL | D | 225 | -34.134 | 27.820 | -16.061 | 1.00 | 58.27 | C   |
| ATOM | 4744 | C   | VAL | D | 225 | -32.878 | 26.943 | -16.165 | 1.00 | 56.18 | C   |
| ATOM | 4745 | O   | VAL | D | 225 | -32.963 | 25.711 | -16.100 | 1.00 | 55.19 | O   |
| ATOM | 4746 | CB  | VAL | D | 225 | -34.512 | 28.498 | -17.393 | 1.00 | 61.01 | C   |
| ATOM | 4747 | CG1 | VAL | D | 225 | -34.452 | 27.551 | -18.573 | 1.00 | 63.39 | C   |
| ATOM | 4748 | CG2 | VAL | D | 225 | -35.882 | 29.146 | -17.318 | 1.00 | 63.83 | C   |
| ATOM | 4749 | N   | ILE | D | 226 | -31.705 | 27.579 | -16.242 | 1.00 | 55.44 | N   |
| ATOM | 4750 | CA  | ILE | D | 226 | -30.440 | 26.828 | -16.335 | 1.00 | 60.68 | C   |
| ATOM | 4751 | C   | ILE | D | 226 | -30.297 | 25.937 | -15.095 | 1.00 | 53.24 | C   |
| ATOM | 4752 | O   | ILE | D | 226 | -29.859 | 24.819 | -15.202 | 1.00 | 51.81 | O   |
| ATOM | 4753 | CB  | ILE | D | 226 | -29.199 | 27.732 | -16.551 | 1.00 | 63.08 | C   |
| ATOM | 4754 | CG1 | ILE | D | 226 | -29.339 | 28.644 | -17.779 | 1.00 | 67.12 | C   |
| ATOM | 4755 | CG2 | ILE | D | 226 | -27.941 | 26.873 | -16.649 | 1.00 | 64.71 | C   |
| ATOM | 4756 | CD1 | ILE | D | 226 | -28.374 | 29.813 | -17.823 | 1.00 | 64.41 | C   |
| ATOM | 4757 | N   | ARG | D | 227 | -30.686 | 26.445 | -13.929 | 1.00 | 57.57 | N   |
| ATOM | 4758 | CA  | ARG | D | 227 | -30.510 | 25.700 | -12.667 | 1.00 | 63.82 | C   |

|      |      |     |     |   |     |         |        |         |      |       |     |
|------|------|-----|-----|---|-----|---------|--------|---------|------|-------|-----|
| ATOM | 4759 | C   | ARG | D | 227 | -31.509 | 24.534 | -12.590 | 1.00 | 64.74 | C   |
| ATOM | 4760 | O   | ARG | D | 227 | -31.184 | 23.510 | -12.014 | 1.00 | 58.82 | O   |
| ATOM | 4761 | CB  | ARG | D | 227 | -30.635 | 26.631 | -11.452 | 1.00 | 65.35 | C   |
| ATOM | 4762 | CG  | ARG | D | 227 | -29.311 | 27.221 | -10.985 | 1.00 | 66.64 | C   |
| ATOM | 4763 | CD  | ARG | D | 227 | -29.459 | 28.332 | -9.966  | 1.00 | 67.30 | C   |
| ATOM | 4764 | NE  | ARG | D | 227 | -28.145 | 28.813 | -9.559  | 1.00 | 74.91 | N   |
| ATOM | 4765 | CZ  | ARG | D | 227 | -27.911 | 29.988 | -8.971  | 1.00 | 79.63 | C   |
| ATOM | 4766 | NH1 | ARG | D | 227 | -28.899 | 30.850 | -8.796  | 1.00 | 65.76 | N1+ |
| ATOM | 4767 | NH2 | ARG | D | 227 | -26.693 | 30.296 | -8.555  | 1.00 | 76.46 | N   |
| ATOM | 4768 | N   | SER | D | 228 | -32.713 | 24.704 | -13.158 | 1.00 | 68.83 | N   |
| ATOM | 4769 | CA  | SER | D | 228 | -33.778 | 23.679 | -13.131 | 1.00 | 65.61 | C   |
| ATOM | 4770 | C   | SER | D | 228 | -33.462 | 22.494 | -14.048 | 1.00 | 63.62 | C   |
| ATOM | 4771 | O   | SER | D | 228 | -33.938 | 21.432 | -13.777 | 1.00 | 64.77 | O   |
| ATOM | 4772 | CB  | SER | D | 228 | -35.110 | 24.263 | -13.496 | 1.00 | 65.42 | C   |
| ATOM | 4773 | OG  | SER | D | 228 | -35.513 | 25.199 | -12.516 | 1.00 | 69.84 | O   |
| ATOM | 4774 | N   | ARG | D | 229 | -32.702 | 22.705 | -15.137 | 1.00 | 69.40 | N   |
| ATOM | 4775 | CA  | ARG | D | 229 | -32.300 | 21.633 | -16.096 | 1.00 | 68.26 | C   |
| ATOM | 4776 | C   | ARG | D | 229 | -32.137 | 20.281 | -15.374 | 1.00 | 72.37 | C   |
| ATOM | 4777 | O   | ARG | D | 229 | -31.518 | 20.237 | -14.315 | 1.00 | 68.24 | O   |
| ATOM | 4778 | CB  | ARG | D | 229 | -30.954 | 21.966 | -16.755 | 1.00 | 66.46 | C   |
| ATOM | 4779 | CG  | ARG | D | 229 | -31.021 | 22.907 | -17.950 | 1.00 | 65.87 | C   |
| ATOM | 4780 | CD  | ARG | D | 229 | -29.709 | 22.987 | -18.720 | 1.00 | 60.70 | C   |
| ATOM | 4781 | NE  | ARG | D | 229 | -29.383 | 21.768 | -19.460 | 1.00 | 56.55 | N   |
| ATOM | 4782 | CZ  | ARG | D | 229 | -29.129 | 21.691 | -20.773 | 1.00 | 56.88 | C   |
| ATOM | 4783 | NH1 | ARG | D | 229 | -29.066 | 22.776 | -21.525 | 1.00 | 58.49 | N1+ |
| ATOM | 4784 | NH2 | ARG | D | 229 | -28.916 | 20.515 | -21.333 | 1.00 | 51.35 | N   |
| ATOM | 4785 | N   | LYS | D | 230 | -32.655 | 19.192 | -15.970 | 1.00 | 71.07 | N   |
| ATOM | 4786 | CA  | LYS | D | 230 | -32.393 | 17.811 | -15.509 | 1.00 | 68.85 | C   |
| ATOM | 4787 | C   | LYS | D | 230 | -31.134 | 17.263 | -16.194 | 1.00 | 65.50 | C   |
| ATOM | 4788 | O   | LYS | D | 230 | -30.317 | 16.611 | -15.557 | 1.00 | 53.60 | O   |
| ATOM | 4789 | CB  | LYS | D | 230 | -33.585 | 16.887 | -15.791 | 1.00 | 82.52 | C   |
| ATOM | 4790 | CG  | LYS | D | 230 | -34.600 | 16.770 | -14.657 | 1.00 | 94.21 | C   |
| ATOM | 4791 | CD  | LYS | D | 230 | -35.518 | 15.560 | -14.748 | 1.00 | 97.57 | C   |

|      |      |     |     |   |     |         |        |         |      |       |     |
|------|------|-----|-----|---|-----|---------|--------|---------|------|-------|-----|
| ATOM | 4792 | CE  | LYS | D | 230 | -36.701 | 15.758 | -15.674 | 1.00 | 98.00 | C   |
| ATOM | 4793 | NZ  | LYS | D | 230 | -37.144 | 14.472 | -16.261 | 1.00 | 98.72 | N1+ |
| ATOM | 4794 | N   | THR | D | 231 | -30.990 | 17.526 | -17.502 | 1.00 | 66.64 | N   |
| ATOM | 4795 | CA  | THR | D | 231 | -29.809 | 17.088 | -18.269 | 1.00 | 63.85 | C   |
| ATOM | 4796 | C   | THR | D | 231 | -28.730 | 18.169 | -18.210 | 1.00 | 66.82 | C   |
| ATOM | 4797 | O   | THR | D | 231 | -29.023 | 19.362 | -18.122 | 1.00 | 69.10 | O   |
| ATOM | 4798 | CB  | THR | D | 231 | -30.179 | 16.711 | -19.714 | 1.00 | 69.32 | C   |
| ATOM | 4799 | CG2 | THR | D | 231 | -31.178 | 15.575 | -19.771 | 1.00 | 68.81 | C   |
| ATOM | 4800 | OG1 | THR | D | 231 | -30.721 | 17.822 | -20.431 | 1.00 | 61.08 | O   |
| ATOM | 4801 | N   | PRO | D | 232 | -27.432 | 17.797 | -18.237 | 1.00 | 64.15 | N   |
| ATOM | 4802 | CA  | PRO | D | 232 | -26.354 | 18.785 | -18.237 | 1.00 | 60.20 | C   |
| ATOM | 4803 | C   | PRO | D | 232 | -26.072 | 19.363 | -19.634 | 1.00 | 57.84 | C   |
| ATOM | 4804 | O   | PRO | D | 232 | -26.010 | 18.627 | -20.604 | 1.00 | 65.93 | O   |
| ATOM | 4805 | CB  | PRO | D | 232 | -25.186 | 17.950 | -17.692 | 1.00 | 57.47 | C   |
| ATOM | 4806 | CG  | PRO | D | 232 | -25.427 | 16.580 | -18.242 | 1.00 | 53.47 | C   |
| ATOM | 4807 | CD  | PRO | D | 232 | -26.930 | 16.419 | -18.250 | 1.00 | 58.18 | C   |
| ATOM | 4808 | N   | SER | D | 233 | -25.874 | 20.681 | -19.721 | 1.00 | 55.45 | N   |
| ATOM | 4809 | CA  | SER | D | 233 | -25.499 | 21.340 | -20.971 | 1.00 | 50.40 | C   |
| ATOM | 4810 | C   | SER | D | 233 | -24.255 | 20.656 | -21.562 | 1.00 | 47.93 | C   |
| ATOM | 4811 | O   | SER | D | 233 | -23.450 | 20.080 | -20.845 | 1.00 | 47.12 | O   |
| ATOM | 4812 | CB  | SER | D | 233 | -25.306 | 22.833 | -20.748 | 1.00 | 53.50 | C   |
| ATOM | 4813 | OG  | SER | D | 233 | -24.383 | 23.114 | -19.694 | 1.00 | 59.32 | O   |
| ATOM | 4814 | N   | LYS | D | 234 | -24.072 | 20.778 | -22.879 | 1.00 | 51.39 | N   |
| ATOM | 4815 | CA  | LYS | D | 234 | -23.150 | 19.920 | -23.657 | 1.00 | 49.70 | C   |
| ATOM | 4816 | C   | LYS | D | 234 | -21.691 | 20.396 | -23.574 | 1.00 | 49.74 | C   |
| ATOM | 4817 | O   | LYS | D | 234 | -20.768 | 19.614 | -23.893 | 1.00 | 46.24 | O   |
| ATOM | 4818 | CB  | LYS | D | 234 | -23.635 | 19.856 | -25.111 | 1.00 | 52.35 | C   |
| ATOM | 4819 | CG  | LYS | D | 234 | -25.097 | 19.426 | -25.260 | 1.00 | 57.64 | C   |
| ATOM | 4820 | CD  | LYS | D | 234 | -25.311 | 18.212 | -26.147 | 1.00 | 64.93 | C   |
| ATOM | 4821 | CE  | LYS | D | 234 | -26.069 | 17.069 | -25.492 | 1.00 | 69.03 | C   |
| ATOM | 4822 | NZ  | LYS | D | 234 | -27.505 | 17.384 | -25.314 | 1.00 | 68.01 | N1+ |
| ATOM | 4823 | N   | VAL | D | 235 | -21.473 | 21.656 | -23.160 | 1.00 | 50.60 | N   |
| ATOM | 4824 | CA  | VAL | D | 235 | -20.167 | 22.333 | -23.304 | 1.00 | 53.96 | C   |



|      |      |     |     |   |     |         |        |         |      |       |   |
|------|------|-----|-----|---|-----|---------|--------|---------|------|-------|---|
| ATOM | 4825 | C   | VAL | D | 235 | -19.675 | 22.850 | -21.949 | 1.00 | 50.89 | C |
| ATOM | 4826 | O   | VAL | D | 235 | -20.105 | 23.913 | -21.483 | 1.00 | 56.26 | O |
| ATOM | 4827 | CB  | VAL | D | 235 | -20.208 | 23.483 | -24.334 | 1.00 | 52.57 | C |
| ATOM | 4828 | CG1 | VAL | D | 235 | -18.847 | 24.171 | -24.445 | 1.00 | 48.95 | C |
| ATOM | 4829 | CG2 | VAL | D | 235 | -20.676 | 22.999 | -25.702 | 1.00 | 49.03 | C |
| ATOM | 4830 | N   | PHE | D | 236 | -18.697 | 22.143 | -21.379 | 1.00 | 44.98 | N |
| ATOM | 4831 | CA  | PHE | D | 236 | -18.097 | 22.572 | -20.121 | 1.00 | 48.94 | C |
| ATOM | 4832 | C   | PHE | D | 236 | -17.553 | 24.008 | -20.266 | 1.00 | 46.01 | C |
| ATOM | 4833 | O   | PHE | D | 236 | -17.710 | 24.819 | -19.360 | 1.00 | 44.24 | O |
| ATOM | 4834 | CB  | PHE | D | 236 | -17.023 | 21.577 | -19.673 | 1.00 | 50.79 | C |
| ATOM | 4835 | CG  | PHE | D | 236 | -16.205 | 22.040 | -18.500 | 1.00 | 53.90 | C |
| ATOM | 4836 | CD1 | PHE | D | 236 | -15.064 | 22.806 | -18.693 | 1.00 | 53.57 | C |
| ATOM | 4837 | CD2 | PHE | D | 236 | -16.581 | 21.721 | -17.202 | 1.00 | 53.21 | C |
| ATOM | 4838 | CE1 | PHE | D | 236 | -14.312 | 23.241 | -17.610 | 1.00 | 52.56 | C |
| ATOM | 4839 | CE2 | PHE | D | 236 | -15.813 | 22.136 | -16.122 | 1.00 | 51.19 | C |
| ATOM | 4840 | CZ  | PHE | D | 236 | -14.674 | 22.885 | -16.328 | 1.00 | 50.25 | C |
| ATOM | 4841 | N   | TYR | D | 237 | -16.962 | 24.307 | -21.430 | 1.00 | 41.79 | N |
| ATOM | 4842 | CA  | TYR | D | 237 | -16.202 | 25.520 | -21.674 | 1.00 | 40.57 | C |
| ATOM | 4843 | C   | TYR | D | 237 | -17.060 | 26.782 | -21.529 | 1.00 | 38.31 | C |
| ATOM | 4844 | O   | TYR | D | 237 | -16.502 | 27.809 | -21.200 | 1.00 | 37.57 | O |
| ATOM | 4845 | CB  | TYR | D | 237 | -15.508 | 25.466 | -23.035 | 1.00 | 39.23 | C |
| ATOM | 4846 | CG  | TYR | D | 237 | -14.637 | 26.656 | -23.387 | 1.00 | 40.57 | C |
| ATOM | 4847 | CD1 | TYR | D | 237 | -13.373 | 26.824 | -22.836 | 1.00 | 38.17 | C |
| ATOM | 4848 | CD2 | TYR | D | 237 | -15.056 | 27.590 | -24.325 | 1.00 | 38.06 | C |
| ATOM | 4849 | CE1 | TYR | D | 237 | -12.562 | 27.886 | -23.208 | 1.00 | 40.07 | C |
| ATOM | 4850 | CE2 | TYR | D | 237 | -14.262 | 28.655 | -24.704 | 1.00 | 36.29 | C |
| ATOM | 4851 | CZ  | TYR | D | 237 | -13.014 | 28.817 | -24.133 | 1.00 | 39.31 | C |
| ATOM | 4852 | OH  | TYR | D | 237 | -12.239 | 29.878 | -24.519 | 1.00 | 38.58 | O |
| ATOM | 4853 | N   | TRP | D | 238 | -18.381 | 26.702 | -21.743 | 1.00 | 40.77 | N |
| ATOM | 4854 | CA  | TRP | D | 238 | -19.259 | 27.886 | -21.601 | 1.00 | 40.98 | C |
| ATOM | 4855 | C   | TRP | D | 238 | -20.592 | 27.551 | -20.932 | 1.00 | 38.84 | C |
| ATOM | 4856 | O   | TRP | D | 238 | -21.618 | 28.188 | -21.226 | 1.00 | 44.13 | O |
| ATOM | 4857 | CB  | TRP | D | 238 | -19.494 | 28.597 | -22.942 | 1.00 | 43.04 | C |

|      |      |     |     |   |     |         |        |         |      |       |     |
|------|------|-----|-----|---|-----|---------|--------|---------|------|-------|-----|
| ATOM | 4858 | CG  | TRP | D | 238 | -19.977 | 27.749 | -24.077 | 1.00 | 41.59 | C   |
| ATOM | 4859 | CD1 | TRP | D | 238 | -21.072 | 26.939 | -24.104 | 1.00 | 43.04 | C   |
| ATOM | 4860 | CD2 | TRP | D | 238 | -19.403 | 27.689 | -25.398 | 1.00 | 39.08 | C   |
| ATOM | 4861 | CE2 | TRP | D | 238 | -20.184 | 26.793 | -26.151 | 1.00 | 37.22 | C   |
| ATOM | 4862 | CE3 | TRP | D | 238 | -18.302 | 28.298 | -26.009 | 1.00 | 39.41 | C   |
| ATOM | 4863 | NE1 | TRP | D | 238 | -21.179 | 26.342 | -25.336 | 1.00 | 44.35 | N   |
| ATOM | 4864 | CZ2 | TRP | D | 238 | -19.900 | 26.482 | -27.471 | 1.00 | 40.42 | C   |
| ATOM | 4865 | CZ3 | TRP | D | 238 | -18.009 | 27.980 | -27.317 | 1.00 | 40.31 | C   |
| ATOM | 4866 | CH2 | TRP | D | 238 | -18.800 | 27.087 | -28.036 | 1.00 | 43.52 | C   |
| ATOM | 4867 | N   | ASP | D | 239 | -20.551 | 26.586 | -20.019 | 1.00 | 38.40 | N   |
| ATOM | 4868 | CA  | ASP | D | 239 | -21.619 | 26.304 | -19.059 | 1.00 | 39.44 | C   |
| ATOM | 4869 | C   | ASP | D | 239 | -21.603 | 27.469 | -18.072 | 1.00 | 38.69 | C   |
| ATOM | 4870 | O   | ASP | D | 239 | -20.614 | 27.665 | -17.386 | 1.00 | 42.10 | O   |
| ATOM | 4871 | CB  | ASP | D | 239 | -21.371 | 24.925 | -18.416 | 1.00 | 36.85 | C   |
| ATOM | 4872 | CG  | ASP | D | 239 | -22.169 | 24.592 | -17.166 | 1.00 | 37.88 | C   |
| ATOM | 4873 | OD1 | ASP | D | 239 | -22.896 | 25.478 | -16.650 | 1.00 | 37.15 | O   |
| ATOM | 4874 | OD2 | ASP | D | 239 | -22.036 | 23.436 | -16.705 | 1.00 | 39.26 | O1- |
| ATOM | 4875 | N   | LEU | D | 240 | -22.670 | 28.269 | -18.032 | 1.00 | 42.76 | N   |
| ATOM | 4876 | CA  | LEU | D | 240 | -22.610 | 29.545 | -17.307 | 1.00 | 42.76 | C   |
| ATOM | 4877 | C   | LEU | D | 240 | -22.700 | 29.336 | -15.778 | 1.00 | 47.76 | C   |
| ATOM | 4878 | O   | LEU | D | 240 | -22.485 | 30.286 | -15.030 | 1.00 | 49.24 | O   |
| ATOM | 4879 | CB  | LEU | D | 240 | -23.707 | 30.473 | -17.835 | 1.00 | 41.73 | C   |
| ATOM | 4880 | CG  | LEU | D | 240 | -23.655 | 30.800 | -19.327 | 1.00 | 44.90 | C   |
| ATOM | 4881 | CD1 | LEU | D | 240 | -24.749 | 31.800 | -19.720 | 1.00 | 45.44 | C   |
| ATOM | 4882 | CD2 | LEU | D | 240 | -22.289 | 31.336 | -19.725 | 1.00 | 50.41 | C   |
| ATOM | 4883 | N   | LEU | D | 241 | -22.966 | 28.105 | -15.305 | 1.00 | 50.07 | N   |
| ATOM | 4884 | CA  | LEU | D | 241 | -23.022 | 27.816 | -13.858 | 1.00 | 52.57 | C   |
| ATOM | 4885 | C   | LEU | D | 241 | -21.614 | 27.646 | -13.262 | 1.00 | 50.58 | C   |
| ATOM | 4886 | O   | LEU | D | 241 | -21.463 | 27.686 | -12.036 | 1.00 | 51.89 | O   |
| ATOM | 4887 | CB  | LEU | D | 241 | -23.855 | 26.555 | -13.607 | 1.00 | 58.18 | C   |
| ATOM | 4888 | CG  | LEU | D | 241 | -25.342 | 26.639 | -13.954 | 1.00 | 60.00 | C   |
| ATOM | 4889 | CD1 | LEU | D | 241 | -26.014 | 25.282 | -13.776 | 1.00 | 58.71 | C   |
| ATOM | 4890 | CD2 | LEU | D | 241 | -26.036 | 27.710 | -13.126 | 1.00 | 54.70 | C   |

|      |      |     |     |   |     |         |        |         |      |       |   |
|------|------|-----|-----|---|-----|---------|--------|---------|------|-------|---|
| ATOM | 4891 | N   | ILE | D | 242 | -20.601 | 27.427 | -14.111 | 1.00 | 50.78 | N |
| ATOM | 4892 | CA  | ILE | D | 242 | -19.206 | 27.265 | -13.658 | 1.00 | 47.49 | C |
| ATOM | 4893 | C   | ILE | D | 242 | -18.347 | 28.424 | -14.195 | 1.00 | 48.42 | C |
| ATOM | 4894 | O   | ILE | D | 242 | -17.634 | 29.026 | -13.414 | 1.00 | 47.80 | O |
| ATOM | 4895 | CB  | ILE | D | 242 | -18.638 | 25.872 | -13.997 | 1.00 | 49.33 | C |
| ATOM | 4896 | CG1 | ILE | D | 242 | -18.767 | 25.534 | -15.479 | 1.00 | 57.23 | C |
| ATOM | 4897 | CG2 | ILE | D | 242 | -19.284 | 24.777 | -13.157 | 1.00 | 51.32 | C |
| ATOM | 4898 | CD1 | ILE | D | 242 | -18.454 | 24.082 | -15.772 | 1.00 | 61.41 | C |
| ATOM | 4899 | N   | LEU | D | 243 | -18.439 | 28.770 | -15.491 | 1.00 | 45.11 | N |
| ATOM | 4900 | CA  | LEU | D | 243 | -17.850 | 30.001 | -15.990 | 1.00 | 40.84 | C |
| ATOM | 4901 | C   | LEU | D | 243 | -18.253 | 31.181 | -15.094 | 1.00 | 42.79 | C |
| ATOM | 4902 | O   | LEU | D | 243 | -17.407 | 32.011 | -14.772 | 1.00 | 46.72 | O |
| ATOM | 4903 | CB  | LEU | D | 243 | -18.275 | 30.273 | -17.436 | 1.00 | 42.00 | C |
| ATOM | 4904 | CG  | LEU | D | 243 | -17.699 | 31.542 | -18.079 | 1.00 | 37.78 | C |
| ATOM | 4905 | CD1 | LEU | D | 243 | -16.194 | 31.512 | -18.083 | 1.00 | 39.65 | C |
| ATOM | 4906 | CD2 | LEU | D | 243 | -18.182 | 31.716 | -19.500 | 1.00 | 39.41 | C |
| ATOM | 4907 | N   | GLY | D | 244 | -19.536 | 31.265 | -14.725 | 1.00 | 43.08 | N |
| ATOM | 4908 | CA  | GLY | D | 244 | -20.043 | 32.319 | -13.848 | 1.00 | 43.23 | C |
| ATOM | 4909 | C   | GLY | D | 244 | -19.419 | 32.290 | -12.452 | 1.00 | 44.43 | C |
| ATOM | 4910 | O   | GLY | D | 244 | -19.424 | 33.302 | -11.740 | 1.00 | 45.89 | O |
| ATOM | 4911 | N   | ASN | D | 245 | -18.879 | 31.133 | -12.047 | 1.00 | 43.84 | N |
| ATOM | 4912 | CA  | ASN | D | 245 | -18.250 | 30.962 | -10.737 | 1.00 | 41.21 | C |
| ATOM | 4913 | C   | ASN | D | 245 | -16.950 | 31.784 | -10.719 | 1.00 | 41.41 | C |
| ATOM | 4914 | O   | ASN | D | 245 | -16.777 | 32.655 | -9.882  | 1.00 | 41.90 | O |
| ATOM | 4915 | CB  | ASN | D | 245 | -18.064 | 29.477 | -10.403 | 1.00 | 37.05 | C |
| ATOM | 4916 | CG  | ASN | D | 245 | -17.174 | 29.224 | -9.199  | 1.00 | 42.73 | C |
| ATOM | 4917 | ND2 | ASN | D | 245 | -17.773 | 28.922 | -8.057  | 1.00 | 36.29 | N |
| ATOM | 4918 | OD1 | ASN | D | 245 | -15.944 | 29.248 | -9.310  | 1.00 | 47.68 | O |
| ATOM | 4919 | N   | TYR | D | 246 | -16.067 | 31.511 | -11.680 | 1.00 | 37.09 | N |
| ATOM | 4920 | CA  | TYR | D | 246 | -14.804 | 32.178 | -11.790 | 1.00 | 40.31 | C |
| ATOM | 4921 | C   | TYR | D | 246 | -15.011 | 33.705 | -11.923 | 1.00 | 39.77 | C |
| ATOM | 4922 | O   | TYR | D | 246 | -14.264 | 34.477 | -11.340 | 1.00 | 38.33 | O |
| ATOM | 4923 | CB  | TYR | D | 246 | -13.985 | 31.603 | -12.952 | 1.00 | 40.78 | C |

|      |      |     |     |   |     |         |        |         |      |       |   |
|------|------|-----|-----|---|-----|---------|--------|---------|------|-------|---|
| ATOM | 4924 | CG  | TYR | D | 246 | -12.755 | 32.423 | -13.226 | 1.00 | 40.59 | C |
| ATOM | 4925 | CD1 | TYR | D | 246 | -11.623 | 32.291 | -12.443 | 1.00 | 45.92 | C |
| ATOM | 4926 | CD2 | TYR | D | 246 | -12.757 | 33.404 | -14.197 | 1.00 | 40.99 | C |
| ATOM | 4927 | CE1 | TYR | D | 246 | -10.506 | 33.094 | -12.638 | 1.00 | 47.52 | C |
| ATOM | 4928 | CE2 | TYR | D | 246 | -11.651 | 34.211 | -14.408 | 1.00 | 43.51 | C |
| ATOM | 4929 | CZ  | TYR | D | 246 | -10.526 | 34.066 | -13.620 | 1.00 | 43.52 | C |
| ATOM | 4930 | OH  | TYR | D | 246 | -9.456  | 34.877 | -13.831 | 1.00 | 49.65 | O |
| ATOM | 4931 | N   | TRP | D | 247 | -16.026 | 34.129 | -12.689 | 1.00 | 37.80 | N |
| ATOM | 4932 | CA  | TRP | D | 247 | -16.347 | 35.535 | -12.910 | 1.00 | 37.19 | C |
| ATOM | 4933 | C   | TRP | D | 247 | -17.063 | 36.168 | -11.701 | 1.00 | 40.87 | C |
| ATOM | 4934 | O   | TRP | D | 247 | -17.511 | 37.342 | -11.787 | 1.00 | 41.66 | O |
| ATOM | 4935 | CB  | TRP | D | 247 | -17.162 | 35.691 | -14.200 | 1.00 | 37.08 | C |
| ATOM | 4936 | CG  | TRP | D | 247 | -16.290 | 35.682 | -15.419 | 1.00 | 40.50 | C |
| ATOM | 4937 | CD1 | TRP | D | 247 | -15.712 | 34.589 | -15.993 | 1.00 | 40.15 | C |
| ATOM | 4938 | CD2 | TRP | D | 247 | -15.835 | 36.819 | -16.175 | 1.00 | 38.31 | C |
| ATOM | 4939 | CE2 | TRP | D | 247 | -15.004 | 36.320 | -17.199 | 1.00 | 37.41 | C |
| ATOM | 4940 | CE3 | TRP | D | 247 | -16.051 | 38.206 | -16.099 | 1.00 | 42.67 | C |
| ATOM | 4941 | NE1 | TRP | D | 247 | -14.956 | 34.958 | -17.062 | 1.00 | 37.81 | N |
| ATOM | 4942 | CZ2 | TRP | D | 247 | -14.380 | 37.159 | -18.132 | 1.00 | 38.72 | C |
| ATOM | 4943 | CZ3 | TRP | D | 247 | -15.440 | 39.037 | -17.027 | 1.00 | 40.51 | C |
| ATOM | 4944 | CH2 | TRP | D | 247 | -14.603 | 38.519 | -18.023 | 1.00 | 38.18 | C |
| ATOM | 4945 | N   | GLY | D | 248 | -17.179 | 35.420 | -10.591 | 1.00 | 40.54 | N |
| ATOM | 4946 | CA  | GLY | D | 248 | -17.638 | 35.935 | -9.300  | 1.00 | 40.46 | C |
| ATOM | 4947 | C   | GLY | D | 248 | -19.107 | 36.320 | -9.310  | 1.00 | 44.41 | C |
| ATOM | 4948 | O   | GLY | D | 248 | -19.509 | 37.260 | -8.628  | 1.00 | 50.63 | O |
| ATOM | 4949 | N   | CYS | D | 249 | -19.924 | 35.589 | -10.074 | 1.00 | 52.97 | N |
| ATOM | 4950 | CA  | CYS | D | 249 | -21.326 | 35.978 | -10.338 | 1.00 | 53.13 | C |
| ATOM | 4951 | C   | CYS | D | 249 | -22.267 | 35.433 | -9.258  | 1.00 | 53.95 | C |
| ATOM | 4952 | O   | CYS | D | 249 | -23.367 | 35.950 | -9.113  | 1.00 | 58.17 | O |
| ATOM | 4953 | CB  | CYS | D | 249 | -21.767 | 35.516 | -11.720 | 1.00 | 53.64 | C |
| ATOM | 4954 | SG  | CYS | D | 249 | -20.972 | 36.436 | -13.067 | 1.00 | 53.84 | S |
| ATOM | 4955 | N   | TYR | D | 250 | -21.789 | 34.448 | -8.474  | 1.00 | 57.60 | N |
| ATOM | 4956 | CA  | TYR | D | 250 | -22.600 | 33.639 | -7.537  | 1.00 | 56.84 | C |

|      |      |     |     |   |     |         |        |         |      |       |     |
|------|------|-----|-----|---|-----|---------|--------|---------|------|-------|-----|
| ATOM | 4957 | C   | TYR | D | 250 | -22.043 | 33.739 | -6.099  | 1.00 | 57.52 | C   |
| ATOM | 4958 | O   | TYR | D | 250 | -20.993 | 34.304 | -5.893  | 1.00 | 60.51 | O   |
| ATOM | 4959 | CB  | TYR | D | 250 | -22.619 | 32.194 | -8.045  | 1.00 | 53.40 | C   |
| ATOM | 4960 | CG  | TYR | D | 250 | -23.056 | 32.027 | -9.482  | 1.00 | 56.89 | C   |
| ATOM | 4961 | CD1 | TYR | D | 250 | -24.154 | 32.717 | -9.984  | 1.00 | 55.08 | C   |
| ATOM | 4962 | CD2 | TYR | D | 250 | -22.386 | 31.165 | -10.344 | 1.00 | 58.81 | C   |
| ATOM | 4963 | CE1 | TYR | D | 250 | -24.569 | 32.568 | -11.297 | 1.00 | 48.53 | C   |
| ATOM | 4964 | CE2 | TYR | D | 250 | -22.793 | 31.001 | -11.659 | 1.00 | 54.49 | C   |
| ATOM | 4965 | CZ  | TYR | D | 250 | -23.889 | 31.707 | -12.129 | 1.00 | 50.77 | C   |
| ATOM | 4966 | OH  | TYR | D | 250 | -24.291 | 31.581 | -13.417 | 1.00 | 56.25 | O   |
| ATOM | 4967 | N   | ASP | D | 251 | -22.760 | 33.184 | -5.110  | 1.00 | 59.43 | N   |
| ATOM | 4968 | CA  | ASP | D | 251 | -22.278 | 33.109 | -3.712  | 1.00 | 65.91 | C   |
| ATOM | 4969 | C   | ASP | D | 251 | -21.573 | 31.770 | -3.462  | 1.00 | 65.84 | C   |
| ATOM | 4970 | O   | ASP | D | 251 | -22.174 | 30.865 | -2.903  | 1.00 | 70.79 | O   |
| ATOM | 4971 | CB  | ASP | D | 251 | -23.414 | 33.222 | -2.689  | 1.00 | 63.68 | C   |
| ATOM | 4972 | CG  | ASP | D | 251 | -24.170 | 34.533 | -2.722  | 1.00 | 69.61 | C   |
| ATOM | 4973 | OD1 | ASP | D | 251 | -23.539 | 35.583 | -2.937  | 1.00 | 63.87 | O   |
| ATOM | 4974 | OD2 | ASP | D | 251 | -25.385 | 34.486 | -2.513  | 1.00 | 82.89 | O1- |
| ATOM | 4975 | N   | GLU | D | 252 | -20.309 | 31.654 | -3.884  | 1.00 | 65.72 | N   |
| ATOM | 4976 | CA  | GLU | D | 252 | -19.516 | 30.404 | -3.790  | 1.00 | 62.01 | C   |
| ATOM | 4977 | C   | GLU | D | 252 | -18.033 | 30.773 | -3.888  | 1.00 | 63.17 | C   |
| ATOM | 4978 | O   | GLU | D | 252 | -17.691 | 31.864 | -4.299  | 1.00 | 70.52 | O   |
| ATOM | 4979 | CB  | GLU | D | 252 | -19.814 | 29.397 | -4.909  | 1.00 | 64.35 | C   |
| ATOM | 4980 | CG  | GLU | D | 252 | -21.243 | 29.408 | -5.445  | 1.00 | 68.37 | C   |
| ATOM | 4981 | CD  | GLU | D | 252 | -21.542 | 28.648 | -6.736  | 1.00 | 67.57 | C   |
| ATOM | 4982 | OE1 | GLU | D | 252 | -22.746 | 28.443 | -7.002  | 1.00 | 81.05 | O   |
| ATOM | 4983 | OE2 | GLU | D | 252 | -20.606 | 28.296 | -7.500  | 1.00 | 53.40 | O1- |
| ATOM | 4984 | N   | GLN | D | 253 | -17.157 | 29.844 | -3.522  | 1.00 | 67.61 | N   |
| ATOM | 4985 | CA  | GLN | D | 253 | -15.726 | 30.076 | -3.624  | 1.00 | 68.52 | C   |
| ATOM | 4986 | C   | GLN | D | 253 | -15.337 | 29.917 | -5.101  | 1.00 | 60.32 | C   |
| ATOM | 4987 | O   | GLN | D | 253 | -15.675 | 28.913 | -5.725  | 1.00 | 61.15 | O   |
| ATOM | 4988 | CB  | GLN | D | 253 | -14.952 | 29.113 | -2.708  | 1.00 | 74.94 | C   |
| ATOM | 4989 | CG  | GLN | D | 253 | -13.958 | 29.795 | -1.767  | 1.00 | 78.30 | C   |

|      |      |     |     |   |     |         |        |         |      |       |     |
|------|------|-----|-----|---|-----|---------|--------|---------|------|-------|-----|
| ATOM | 4990 | CD  | GLN | D | 253 | -12.694 | 29.005 | -1.506  | 1.00 | 78.47 | C   |
| ATOM | 4991 | NE2 | GLN | D | 253 | -12.804 | 27.685 | -1.465  | 1.00 | 76.04 | N   |
| ATOM | 4992 | OE1 | GLN | D | 253 | -11.616 | 29.574 | -1.337  | 1.00 | 76.04 | O   |
| ATOM | 4993 | N   | LYS | D | 254 | -14.643 | 30.920 | -5.648  | 1.00 | 55.47 | N   |
| ATOM | 4994 | CA  | LYS | D | 254 | -14.115 | 30.870 | -7.008  | 1.00 | 56.82 | C   |
| ATOM | 4995 | C   | LYS | D | 254 | -13.219 | 29.631 | -7.177  | 1.00 | 51.80 | C   |
| ATOM | 4996 | O   | LYS | D | 254 | -12.320 | 29.421 | -6.404  | 1.00 | 53.26 | O   |
| ATOM | 4997 | CB  | LYS | D | 254 | -13.323 | 32.144 | -7.334  | 1.00 | 54.11 | C   |
| ATOM | 4998 | CG  | LYS | D | 254 | -14.146 | 33.404 | -7.592  | 1.00 | 54.98 | C   |
| ATOM | 4999 | CD  | LYS | D | 254 | -13.297 | 34.673 | -7.553  | 1.00 | 53.93 | C   |
| ATOM | 5000 | CE  | LYS | D | 254 | -13.932 | 35.861 | -8.238  | 1.00 | 59.04 | C   |
| ATOM | 5001 | NZ  | LYS | D | 254 | -13.376 | 37.138 | -7.731  | 1.00 | 63.60 | N1+ |
| ATOM | 5002 | N   | ARG | D | 255 | -13.468 | 28.827 | -8.217  | 1.00 | 55.39 | N   |
| ATOM | 5003 | CA  | ARG | D | 255 | -12.512 | 27.793 | -8.663  | 1.00 | 56.55 | C   |
| ATOM | 5004 | C   | ARG | D | 255 | -11.983 | 28.185 | -10.054 | 1.00 | 54.13 | C   |
| ATOM | 5005 | O   | ARG | D | 255 | -12.497 | 29.100 | -10.707 | 1.00 | 53.45 | O   |
| ATOM | 5006 | CB  | ARG | D | 255 | -13.143 | 26.392 | -8.663  | 1.00 | 56.51 | C   |
| ATOM | 5007 | CG  | ARG | D | 255 | -14.023 | 26.076 | -7.456  | 1.00 | 60.48 | C   |
| ATOM | 5008 | CD  | ARG | D | 255 | -14.968 | 24.883 | -7.646  | 1.00 | 64.36 | C   |
| ATOM | 5009 | NE  | ARG | D | 255 | -15.926 | 25.015 | -8.755  | 1.00 | 65.80 | N   |
| ATOM | 5010 | CZ  | ARG | D | 255 | -17.223 | 25.344 | -8.639  | 1.00 | 63.49 | C   |
| ATOM | 5011 | NH1 | ARG | D | 255 | -17.774 | 25.496 | -7.448  | 1.00 | 66.40 | N1+ |
| ATOM | 5012 | NH2 | ARG | D | 255 | -17.976 | 25.507 | -9.714  | 1.00 | 54.21 | N   |
| ATOM | 5013 | N   | TYR | D | 256 | -10.916 | 27.506 | -10.481 | 1.00 | 52.30 | N   |
| ATOM | 5014 | CA  | TYR | D | 256 | -10.384 | 27.631 | -11.832 | 1.00 | 49.97 | C   |
| ATOM | 5015 | C   | TYR | D | 256 | -11.356 | 26.972 | -12.815 | 1.00 | 48.10 | C   |
| ATOM | 5016 | O   | TYR | D | 256 | -11.684 | 25.789 | -12.667 | 1.00 | 47.94 | O   |
| ATOM | 5017 | CB  | TYR | D | 256 | -8.997  | 26.981 | -11.924 | 1.00 | 52.29 | C   |
| ATOM | 5018 | CG  | TYR | D | 256 | -8.509  | 26.651 | -13.319 | 1.00 | 52.36 | C   |
| ATOM | 5019 | CD1 | TYR | D | 256 | -7.852  | 27.602 | -14.092 | 1.00 | 47.18 | C   |
| ATOM | 5020 | CD2 | TYR | D | 256 | -8.693  | 25.385 | -13.866 | 1.00 | 45.47 | C   |
| ATOM | 5021 | CE1 | TYR | D | 256 | -7.415  | 27.315 | -15.373 | 1.00 | 43.17 | C   |
| ATOM | 5022 | CE2 | TYR | D | 256 | -8.255  | 25.080 | -15.144 | 1.00 | 44.43 | C   |

|      |      |     |     |   |     |         |        |         |      |       |   |
|------|------|-----|-----|---|-----|---------|--------|---------|------|-------|---|
| ATOM | 5023 | CZ  | TYR | D | 256 | -7.617  | 26.051 | -15.896 | 1.00 | 44.63 | C |
| ATOM | 5024 | OH  | TYR | D | 256 | -7.161  | 25.756 | -17.136 | 1.00 | 44.08 | O |
| ATOM | 5025 | N   | HIS | D | 257 | -11.781 | 27.725 | -13.833 | 1.00 | 48.11 | N |
| ATOM | 5026 | CA  | HIS | D | 257 | -12.613 | 27.176 | -14.913 | 1.00 | 49.36 | C |
| ATOM | 5027 | C   | HIS | D | 257 | -11.743 | 26.911 | -16.154 | 1.00 | 47.61 | C |
| ATOM | 5028 | O   | HIS | D | 257 | -11.592 | 25.760 | -16.595 | 1.00 | 51.15 | O |
| ATOM | 5029 | CB  | HIS | D | 257 | -13.823 | 28.082 | -15.168 | 1.00 | 48.40 | C |
| ATOM | 5030 | CG  | HIS | D | 257 | -14.644 | 27.609 | -16.315 | 1.00 | 52.66 | C |
| ATOM | 5031 | CD2 | HIS | D | 257 | -15.354 | 26.479 | -16.499 | 1.00 | 55.95 | C |
| ATOM | 5032 | ND1 | HIS | D | 257 | -14.756 | 28.324 | -17.481 | 1.00 | 51.70 | N |
| ATOM | 5033 | CE1 | HIS | D | 257 | -15.502 | 27.655 | -18.328 | 1.00 | 52.75 | C |
| ATOM | 5034 | NE2 | HIS | D | 257 | -15.869 | 26.518 | -17.760 | 1.00 | 53.64 | N |
| ATOM | 5035 | N   | HIS | D | 258 | -11.163 | 27.986 | -16.694 | 1.00 | 47.07 | N |
| ATOM | 5036 | CA  | HIS | D | 258 | -10.234 | 27.971 | -17.838 | 1.00 | 45.60 | C |
| ATOM | 5037 | C   | HIS | D | 258 | -9.390  | 29.246 | -17.759 | 1.00 | 42.03 | C |
| ATOM | 5038 | O   | HIS | D | 258 | -9.772  | 30.152 | -17.031 | 1.00 | 39.81 | O |
| ATOM | 5039 | CB  | HIS | D | 258 | -11.007 | 27.915 | -19.163 | 1.00 | 46.13 | C |
| ATOM | 5040 | CG  | HIS | D | 258 | -11.554 | 29.239 | -19.582 | 1.00 | 43.80 | C |
| ATOM | 5041 | CD2 | HIS | D | 258 | -11.062 | 30.193 | -20.422 | 1.00 | 41.81 | C |
| ATOM | 5042 | ND1 | HIS | D | 258 | -12.742 | 29.728 | -19.078 | 1.00 | 40.40 | N |
| ATOM | 5043 | CE1 | HIS | D | 258 | -12.976 | 30.920 | -19.610 | 1.00 | 42.09 | C |
| ATOM | 5044 | NE2 | HIS | D | 258 | -11.952 | 31.236 | -20.432 | 1.00 | 40.67 | N |
| ATOM | 5045 | N   | THR | D | 259 | -8.276  | 29.315 | -18.501 | 1.00 | 39.30 | N |
| ATOM | 5046 | CA  | THR | D | 259 | -7.420  | 30.516 | -18.500 | 1.00 | 39.18 | C |
| ATOM | 5047 | C   | THR | D | 259 | -7.984  | 31.625 | -19.398 | 1.00 | 39.16 | C |
| ATOM | 5048 | O   | THR | D | 259 | -7.943  | 31.508 | -20.640 | 1.00 | 41.45 | O |
| ATOM | 5049 | CB  | THR | D | 259 | -6.002  | 30.227 | -18.982 | 1.00 | 35.59 | C |
| ATOM | 5050 | CG2 | THR | D | 259 | -5.208  | 31.504 | -19.095 | 1.00 | 36.31 | C |
| ATOM | 5051 | OG1 | THR | D | 259 | -5.375  | 29.336 | -18.060 | 1.00 | 34.87 | O |
| ATOM | 5052 | N   | VAL | D | 260 | -8.436  | 32.723 | -18.771 | 1.00 | 37.26 | N |
| ATOM | 5053 | CA  | VAL | D | 260 | -9.059  | 33.827 | -19.491 | 1.00 | 36.32 | C |
| ATOM | 5054 | C   | VAL | D | 260 | -7.989  | 34.614 | -20.232 | 1.00 | 39.41 | C |
| ATOM | 5055 | O   | VAL | D | 260 | -6.869  | 34.762 | -19.739 | 1.00 | 43.50 | O |

|      |      |     |     |   |     |         |        |         |      |       |   |
|------|------|-----|-----|---|-----|---------|--------|---------|------|-------|---|
| ATOM | 5056 | CB  | VAL | D | 260 | -9.856  | 34.748 | -18.556 | 1.00 | 38.75 | C |
| ATOM | 5057 | CG1 | VAL | D | 260 | -11.053 | 34.018 | -17.974 | 1.00 | 42.84 | C |
| ATOM | 5058 | CG2 | VAL | D | 260 | -9.020  | 35.367 | -17.446 | 1.00 | 39.24 | C |
| ATOM | 5059 | N   | PRO | D | 261 | -8.334  | 35.244 | -21.377 | 1.00 | 39.93 | N |
| ATOM | 5060 | CA  | PRO | D | 261 | -7.346  | 35.974 | -22.175 | 1.00 | 38.76 | C |
| ATOM | 5061 | C   | PRO | D | 261 | -7.131  | 37.389 | -21.601 | 1.00 | 37.52 | C |
| ATOM | 5062 | O   | PRO | D | 261 | -7.727  | 38.359 | -22.059 | 1.00 | 40.66 | O |
| ATOM | 5063 | CB  | PRO | D | 261 | -8.036  | 35.939 | -23.553 | 1.00 | 39.07 | C |
| ATOM | 5064 | CG  | PRO | D | 261 | -9.530  | 36.125 | -23.217 | 1.00 | 34.57 | C |
| ATOM | 5065 | CD  | PRO | D | 261 | -9.712  | 35.417 | -21.888 | 1.00 | 35.13 | C |
| ATOM | 5066 | N   | SER | D | 262 | -6.297  | 37.501 | -20.568 | 1.00 | 36.95 | N |
| ATOM | 5067 | CA  | SER | D | 262 | -6.222  | 38.718 | -19.751 | 1.00 | 37.88 | C |
| ATOM | 5068 | C   | SER | D | 262 | -5.861  | 39.957 | -20.592 | 1.00 | 35.73 | C |
| ATOM | 5069 | O   | SER | D | 262 | -6.341  | 41.045 | -20.319 | 1.00 | 35.60 | O |
| ATOM | 5070 | CB  | SER | D | 262 | -5.253  | 38.526 | -18.605 | 1.00 | 39.52 | C |
| ATOM | 5071 | OG  | SER | D | 262 | -3.995  | 38.057 | -19.062 | 1.00 | 36.36 | O |
| ATOM | 5072 | N   | ASN | D | 263 | -4.993  | 39.798 | -21.590 | 1.00 | 34.34 | N |
| ATOM | 5073 | CA  | ASN | D | 263 | -4.666  | 40.884 | -22.518 | 1.00 | 37.54 | C |
| ATOM | 5074 | C   | ASN | D | 263 | -5.942  | 41.498 | -23.139 | 1.00 | 38.94 | C |
| ATOM | 5075 | O   | ASN | D | 263 | -6.179  | 42.743 | -23.080 | 1.00 | 31.01 | O |
| ATOM | 5076 | CB  | ASN | D | 263 | -3.699  | 40.399 | -23.597 | 1.00 | 36.36 | C |
| ATOM | 5077 | CG  | ASN | D | 263 | -2.417  | 39.895 | -22.975 | 1.00 | 41.39 | C |
| ATOM | 5078 | ND2 | ASN | D | 263 | -1.414  | 40.763 | -22.869 | 1.00 | 38.99 | N |
| ATOM | 5079 | OD1 | ASN | D | 263 | -2.361  | 38.735 | -22.559 | 1.00 | 43.81 | O |
| ATOM | 5080 | N   | LEU | D | 264 | -6.785  | 40.630 | -23.714 | 1.00 | 38.57 | N |
| ATOM | 5081 | CA  | LEU | D | 264 | -8.034  | 41.065 | -24.374 | 1.00 | 40.42 | C |
| ATOM | 5082 | C   | LEU | D | 264 | -8.980  | 41.695 | -23.355 | 1.00 | 38.07 | C |
| ATOM | 5083 | O   | LEU | D | 264 | -9.645  | 42.673 | -23.681 | 1.00 | 41.27 | O |
| ATOM | 5084 | CB  | LEU | D | 264 | -8.686  | 39.877 | -25.089 | 1.00 | 40.03 | C |
| ATOM | 5085 | CG  | LEU | D | 264 | -7.816  | 39.228 | -26.167 | 1.00 | 40.84 | C |
| ATOM | 5086 | CD1 | LEU | D | 264 | -8.595  | 38.161 | -26.908 | 1.00 | 42.77 | C |
| ATOM | 5087 | CD2 | LEU | D | 264 | -7.304  | 40.278 | -27.148 | 1.00 | 40.12 | C |
| ATOM | 5088 | N   | ILE | D | 265 | -9.006  | 41.138 | -22.133 | 1.00 | 34.14 | N |



|      |      |     |     |   |     |         |        |         |      |       |   |
|------|------|-----|-----|---|-----|---------|--------|---------|------|-------|---|
| ATOM | 5089 | CA  | ILE | D | 265 | -9.809  | 41.688 | -21.040 | 1.00 | 33.35 | C |
| ATOM | 5090 | C   | ILE | D | 265 | -9.345  | 43.103 | -20.651 | 1.00 | 31.79 | C |
| ATOM | 5091 | O   | ILE | D | 265 | -10.171 | 43.941 | -20.392 | 1.00 | 31.79 | O |
| ATOM | 5092 | CB  | ILE | D | 265 | -9.809  | 40.752 | -19.831 | 1.00 | 31.33 | C |
| ATOM | 5093 | CG1 | ILE | D | 265 | -10.621 | 39.497 | -20.132 | 1.00 | 33.46 | C |
| ATOM | 5094 | CG2 | ILE | D | 265 | -10.320 | 41.474 | -18.605 | 1.00 | 31.65 | C |
| ATOM | 5095 | CD1 | ILE | D | 265 | -10.392 | 38.367 | -19.158 | 1.00 | 35.11 | C |
| ATOM | 5096 | N   | PHE | D | 266 | -8.032  | 43.349 | -20.614 | 1.00 | 36.27 | N |
| ATOM | 5097 | CA  | PHE | D | 266 | -7.457  | 44.695 | -20.375 | 1.00 | 36.33 | C |
| ATOM | 5098 | C   | PHE | D | 266 | -7.954  | 45.671 | -21.450 | 1.00 | 38.40 | C |
| ATOM | 5099 | O   | PHE | D | 266 | -8.414  | 46.781 | -21.117 | 1.00 | 39.86 | O |
| ATOM | 5100 | CB  | PHE | D | 266 | -5.921  | 44.676 | -20.365 | 1.00 | 36.32 | C |
| ATOM | 5101 | CG  | PHE | D | 266 | -5.249  | 43.718 | -19.405 | 1.00 | 36.17 | C |
| ATOM | 5102 | CD1 | PHE | D | 266 | -5.813  | 43.401 | -18.178 | 1.00 | 35.87 | C |
| ATOM | 5103 | CD2 | PHE | D | 266 | -4.023  | 43.147 | -19.724 | 1.00 | 37.26 | C |
| ATOM | 5104 | CE1 | PHE | D | 266 | -5.177  | 42.528 | -17.304 | 1.00 | 37.22 | C |
| ATOM | 5105 | CE2 | PHE | D | 266 | -3.388  | 42.280 | -18.845 | 1.00 | 36.98 | C |
| ATOM | 5106 | CZ  | PHE | D | 266 | -3.962  | 41.974 | -17.636 | 1.00 | 36.66 | C |
| ATOM | 5107 | N   | ALA | D | 267 | -7.876  | 45.248 | -22.723 | 1.00 | 36.65 | N |
| ATOM | 5108 | CA  | ALA | D | 267 | -8.320  | 46.070 | -23.861 | 1.00 | 35.54 | C |
| ATOM | 5109 | C   | ALA | D | 267 | -9.807  | 46.407 | -23.746 | 1.00 | 35.99 | C |
| ATOM | 5110 | O   | ALA | D | 267 | -10.202 | 47.529 | -23.992 | 1.00 | 35.95 | O |
| ATOM | 5111 | CB  | ALA | D | 267 | -8.069  | 45.355 | -25.162 | 1.00 | 35.77 | C |
| ATOM | 5112 | N   | LEU | D | 268 | -10.615 | 45.407 | -23.391 | 1.00 | 35.76 | N |
| ATOM | 5113 | CA  | LEU | D | 268 | -12.037 | 45.583 | -23.227 | 1.00 | 38.37 | C |
| ATOM | 5114 | C   | LEU | D | 268 | -12.338 | 46.554 | -22.071 | 1.00 | 39.79 | C |
| ATOM | 5115 | O   | LEU | D | 268 | -13.288 | 47.341 | -22.135 | 1.00 | 37.05 | O |
| ATOM | 5116 | CB  | LEU | D | 268 | -12.680 | 44.214 | -22.967 | 1.00 | 39.98 | C |
| ATOM | 5117 | CG  | LEU | D | 268 | -14.188 | 44.276 | -22.747 | 1.00 | 38.59 | C |
| ATOM | 5118 | CD1 | LEU | D | 268 | -14.889 | 44.678 | -24.032 | 1.00 | 40.96 | C |
| ATOM | 5119 | CD2 | LEU | D | 268 | -14.727 | 42.967 | -22.201 | 1.00 | 37.39 | C |
| ATOM | 5120 | N   | ARG | D | 269 | -11.565 | 46.477 | -20.983 | 1.00 | 39.82 | N |
| ATOM | 5121 | CA  | ARG | D | 269 | -11.850 | 47.331 | -19.824 | 1.00 | 41.36 | C |

|      |      |     |     |   |     |         |        |         |      |       |     |
|------|------|-----|-----|---|-----|---------|--------|---------|------|-------|-----|
| ATOM | 5122 | C   | ARG | D | 269 | -11.739 | 48.798 | -20.270 | 1.00 | 41.08 | C   |
| ATOM | 5123 | O   | ARG | D | 269 | -12.627 | 49.605 | -20.006 | 1.00 | 40.90 | O   |
| ATOM | 5124 | CB  | ARG | D | 269 | -10.925 | 46.961 | -18.658 | 1.00 | 41.74 | C   |
| ATOM | 5125 | CG  | ARG | D | 269 | -11.211 | 47.730 | -17.371 | 1.00 | 43.01 | C   |
| ATOM | 5126 | CD  | ARG | D | 269 | -10.420 | 49.024 | -17.252 | 1.00 | 38.88 | C   |
| ATOM | 5127 | NE  | ARG | D | 269 | -10.656 | 49.661 | -15.961 | 1.00 | 42.85 | N   |
| ATOM | 5128 | CZ  | ARG | D | 269 | -10.432 | 50.954 | -15.692 | 1.00 | 46.61 | C   |
| ATOM | 5129 | NH1 | ARG | D | 269 | -9.759  | 51.704 | -16.550 | 1.00 | 43.43 | N1+ |
| ATOM | 5130 | NH2 | ARG | D | 269 | -10.932 | 51.505 | -14.594 | 1.00 | 43.61 | N   |
| ATOM | 5131 | N   | GLU | D | 270 | -10.675 | 49.095 | -21.020 | 1.00 | 37.02 | N   |
| ATOM | 5132 | CA  | GLU | D | 270 | -10.372 | 50.416 | -21.509 | 1.00 | 39.57 | C   |
| ATOM | 5133 | C   | GLU | D | 270 | -11.396 | 50.879 | -22.569 | 1.00 | 39.88 | C   |
| ATOM | 5134 | O   | GLU | D | 270 | -11.744 | 52.065 | -22.628 | 1.00 | 47.77 | O   |
| ATOM | 5135 | CB  | GLU | D | 270 | -8.931  | 50.426 | -22.047 | 1.00 | 40.13 | C   |
| ATOM | 5136 | CG  | GLU | D | 270 | -7.859  | 50.299 | -20.970 | 1.00 | 37.73 | C   |
| ATOM | 5137 | CD  | GLU | D | 270 | -7.704  | 51.499 | -20.038 | 1.00 | 37.64 | C   |
| ATOM | 5138 | OE1 | GLU | D | 270 | -8.409  | 51.527 | -19.021 | 1.00 | 39.83 | O   |
| ATOM | 5139 | OE2 | GLU | D | 270 | -6.869  | 52.415 | -20.323 | 1.00 | 36.46 | O1- |
| ATOM | 5140 | N   | ALA | D | 271 | -11.887 | 49.970 | -23.408 | 1.00 | 37.47 | N   |
| ATOM | 5141 | CA  | ALA | D | 271 | -12.898 | 50.319 | -24.434 | 1.00 | 39.12 | C   |
| ATOM | 5142 | C   | ALA | D | 271 | -14.214 | 50.772 | -23.783 | 1.00 | 37.35 | C   |
| ATOM | 5143 | O   | ALA | D | 271 | -14.832 | 51.729 | -24.220 | 1.00 | 39.47 | O   |
| ATOM | 5144 | CB  | ALA | D | 271 | -13.129 | 49.165 | -25.380 | 1.00 | 36.41 | C   |
| ATOM | 5145 | N   | ILE | D | 272 | -14.630 | 50.087 | -22.723 | 1.00 | 40.61 | N   |
| ATOM | 5146 | CA  | ILE | D | 272 | -15.869 | 50.422 | -21.992 | 1.00 | 39.59 | C   |
| ATOM | 5147 | C   | ILE | D | 272 | -15.653 | 51.724 | -21.225 | 1.00 | 40.02 | C   |
| ATOM | 5148 | O   | ILE | D | 272 | -16.517 | 52.567 | -21.195 | 1.00 | 44.87 | O   |
| ATOM | 5149 | CB  | ILE | D | 272 | -16.277 | 49.280 | -21.041 | 1.00 | 37.87 | C   |
| ATOM | 5150 | CG1 | ILE | D | 272 | -16.627 | 47.999 | -21.799 | 1.00 | 39.03 | C   |
| ATOM | 5151 | CG2 | ILE | D | 272 | -17.410 | 49.729 | -20.162 | 1.00 | 39.73 | C   |
| ATOM | 5152 | CD1 | ILE | D | 272 | -16.516 | 46.737 | -20.985 | 1.00 | 41.75 | C   |
| ATOM | 5153 | N   | ALA | D | 273 | -14.473 | 51.872 | -20.621 | 1.00 | 42.68 | N   |
| ATOM | 5154 | CA  | ALA | D | 273 | -14.116 | 53.098 | -19.922 | 1.00 | 43.21 | C   |

|      |      |     |     |   |     |         |        |         |      |       |   |
|------|------|-----|-----|---|-----|---------|--------|---------|------|-------|---|
| ATOM | 5155 | C   | ALA | D | 273 | -14.303 | 54.301 | -20.859 | 1.00 | 46.12 | C |
| ATOM | 5156 | O   | ALA | D | 273 | -14.894 | 55.305 | -20.456 | 1.00 | 46.61 | O |
| ATOM | 5157 | CB  | ALA | D | 273 | -12.707 | 53.016 | -19.385 | 1.00 | 43.48 | C |
| ATOM | 5158 | N   | GLN | D | 274 | -13.817 | 54.205 | -22.104 | 1.00 | 43.59 | N |
| ATOM | 5159 | CA  | GLN | D | 274 | -13.957 | 55.326 | -23.051 | 1.00 | 42.40 | C |
| ATOM | 5160 | C   | GLN | D | 274 | -15.440 | 55.708 | -23.198 | 1.00 | 40.57 | C |
| ATOM | 5161 | O   | GLN | D | 274 | -15.802 | 56.860 | -23.324 | 1.00 | 42.04 | O |
| ATOM | 5162 | CB  | GLN | D | 274 | -13.353 | 54.963 | -24.412 | 1.00 | 43.55 | C |
| ATOM | 5163 | CG  | GLN | D | 274 | -11.837 | 55.101 | -24.487 | 1.00 | 46.38 | C |
| ATOM | 5164 | CD  | GLN | D | 274 | -11.224 | 54.407 | -25.681 | 1.00 | 44.99 | C |
| ATOM | 5165 | NE2 | GLN | D | 274 | -12.054 | 53.666 | -26.398 | 1.00 | 38.58 | N |
| ATOM | 5166 | OE1 | GLN | D | 274 | -10.024 | 54.540 | -25.959 | 1.00 | 40.86 | O |
| ATOM | 5167 | N   | ILE | D | 275 | -16.324 | 54.725 | -23.194 | 1.00 | 43.57 | N |
| ATOM | 5168 | CA  | ILE | D | 275 | -17.736 | 55.019 | -23.372 | 1.00 | 49.41 | C |
| ATOM | 5169 | C   | ILE | D | 275 | -18.323 | 55.596 | -22.074 | 1.00 | 49.98 | C |
| ATOM | 5170 | O   | ILE | D | 275 | -19.114 | 56.528 | -22.131 | 1.00 | 45.38 | O |
| ATOM | 5171 | CB  | ILE | D | 275 | -18.467 | 53.768 | -23.892 | 1.00 | 48.19 | C |
| ATOM | 5172 | CG1 | ILE | D | 275 | -18.131 | 53.547 | -25.370 | 1.00 | 47.38 | C |
| ATOM | 5173 | CG2 | ILE | D | 275 | -19.968 | 53.872 | -23.671 | 1.00 | 51.47 | C |
| ATOM | 5174 | CD1 | ILE | D | 275 | -17.897 | 52.110 | -25.737 | 1.00 | 51.54 | C |
| ATOM | 5175 | N   | ALA | D | 276 | -17.903 | 55.060 | -20.916 | 1.00 | 47.50 | N |
| ATOM | 5176 | CA  | ALA | D | 276 | -18.284 | 55.595 | -19.612 | 1.00 | 47.23 | C |
| ATOM | 5177 | C   | ALA | D | 276 | -17.930 | 57.094 | -19.474 | 1.00 | 46.16 | C |
| ATOM | 5178 | O   | ALA | D | 276 | -18.712 | 57.853 | -18.957 | 1.00 | 45.52 | O |
| ATOM | 5179 | CB  | ALA | D | 276 | -17.655 | 54.750 | -18.534 | 1.00 | 50.49 | C |
| ATOM | 5180 | N   | GLU | D | 277 | -16.771 | 57.518 | -19.992 | 1.00 | 51.48 | N |
| ATOM | 5181 | CA  | GLU | D | 277 | -16.228 | 58.880 | -19.822 | 1.00 | 51.55 | C |
| ATOM | 5182 | C   | GLU | D | 277 | -16.913 | 59.891 | -20.749 | 1.00 | 49.79 | C |
| ATOM | 5183 | O   | GLU | D | 277 | -17.138 | 61.029 | -20.352 | 1.00 | 49.26 | O |
| ATOM | 5184 | CB  | GLU | D | 277 | -14.733 | 58.932 | -20.128 | 1.00 | 53.48 | C |
| ATOM | 5185 | CG  | GLU | D | 277 | -13.876 | 58.149 | -19.154 | 1.00 | 60.28 | C |
| ATOM | 5186 | CD  | GLU | D | 277 | -12.424 | 58.048 | -19.591 | 1.00 | 64.33 | C |
| ATOM | 5187 | OE1 | GLU | D | 277 | -12.013 | 58.894 | -20.456 | 1.00 | 64.34 | O |

|      |      |     |     |   |     |         |        |         |      |       |     |
|------|------|-----|-----|---|-----|---------|--------|---------|------|-------|-----|
| ATOM | 5188 | OE2 | GLU | D | 277 | -11.712 | 57.117 | -19.094 | 1.00 | 58.57 | 01- |
| ATOM | 5189 | N   | GLU | D | 278 | -17.212 | 59.496 | -21.990 | 1.00 | 51.60 | N   |
| ATOM | 5190 | CA  | GLU | D | 278 | -17.926 | 60.386 | -22.915 | 1.00 | 53.88 | C   |
| ATOM | 5191 | C   | GLU | D | 278 | -19.414 | 60.417 | -22.522 | 1.00 | 49.69 | C   |
| ATOM | 5192 | O   | GLU | D | 278 | -20.025 | 61.472 | -22.505 | 1.00 | 48.16 | O   |
| ATOM | 5193 | CB  | GLU | D | 278 | -17.689 | 59.986 | -24.373 | 1.00 | 53.41 | C   |
| ATOM | 5194 | CG  | GLU | D | 278 | -18.022 | 61.105 | -25.352 | 1.00 | 61.99 | C   |
| ATOM | 5195 | CD  | GLU | D | 278 | -17.878 | 60.742 | -26.826 | 1.00 | 71.95 | C   |
| ATOM | 5196 | OE1 | GLU | D | 278 | -17.104 | 59.804 | -27.111 | 1.00 | 72.70 | O   |
| ATOM | 5197 | OE2 | GLU | D | 278 | -18.552 | 61.377 | -27.694 | 1.00 | 66.78 | 01- |
| ATOM | 5198 | N   | GLY | D | 279 | -19.945 | 59.272 | -22.093 | 1.00 | 49.40 | N   |
| ATOM | 5199 | CA  | GLY | D | 279 | -21.370 | 59.092 | -21.847 | 1.00 | 51.34 | C   |
| ATOM | 5200 | C   | GLY | D | 279 | -21.978 | 58.252 | -22.958 | 1.00 | 54.43 | C   |
| ATOM | 5201 | O   | GLY | D | 279 | -21.594 | 58.396 | -24.138 | 1.00 | 57.26 | O   |
| ATOM | 5202 | N   | LEU | D | 280 | -22.887 | 57.345 | -22.583 | 1.00 | 56.99 | N   |
| ATOM | 5203 | CA  | LEU | D | 280 | -23.574 | 56.432 | -23.531 | 1.00 | 56.23 | C   |
| ATOM | 5204 | C   | LEU | D | 280 | -24.411 | 57.242 | -24.545 | 1.00 | 55.74 | C   |
| ATOM | 5205 | O   | LEU | D | 280 | -24.371 | 56.965 | -25.748 | 1.00 | 53.65 | O   |
| ATOM | 5206 | CB  | LEU | D | 280 | -24.460 | 55.464 | -22.734 | 1.00 | 57.21 | C   |
| ATOM | 5207 | CG  | LEU | D | 280 | -24.250 | 53.974 | -23.019 | 1.00 | 58.32 | C   |
| ATOM | 5208 | CD1 | LEU | D | 280 | -25.284 | 53.149 | -22.268 | 1.00 | 53.80 | C   |
| ATOM | 5209 | CD2 | LEU | D | 280 | -24.280 | 53.669 | -24.519 | 1.00 | 51.61 | C   |
| ATOM | 5210 | N   | GLU | D | 281 | -25.156 | 58.248 | -24.053 | 1.00 | 53.45 | N   |
| ATOM | 5211 | CA  | GLU | D | 281 | -26.053 | 59.037 | -24.886 | 1.00 | 53.20 | C   |
| ATOM | 5212 | C   | GLU | D | 281 | -25.237 | 59.792 | -25.937 | 1.00 | 49.45 | C   |
| ATOM | 5213 | O   | GLU | D | 281 | -25.495 | 59.659 | -27.139 | 1.00 | 48.42 | O   |
| ATOM | 5214 | CB  | GLU | D | 281 | -26.938 | 59.929 | -24.006 | 1.00 | 57.06 | C   |
| ATOM | 5215 | CG  | GLU | D | 281 | -27.868 | 60.850 | -24.790 | 1.00 | 58.57 | C   |
| ATOM | 5216 | CD  | GLU | D | 281 | -29.093 | 61.343 | -24.035 | 1.00 | 64.05 | C   |
| ATOM | 5217 | OE1 | GLU | D | 281 | -29.430 | 62.527 | -24.185 | 1.00 | 76.48 | O   |
| ATOM | 5218 | OE2 | GLU | D | 281 | -29.717 | 60.548 | -23.301 | 1.00 | 64.79 | 01- |
| ATOM | 5219 | N   | PRO | D | 282 | -24.208 | 60.576 | -25.535 | 1.00 | 44.30 | N   |
| ATOM | 5220 | CA  | PRO | D | 282 | -23.346 | 61.255 | -26.505 | 1.00 | 47.66 | C   |

|      |      |     |     |   |     |         |        |         |      |       |     |
|------|------|-----|-----|---|-----|---------|--------|---------|------|-------|-----|
| ATOM | 5221 | C   | PRO | D | 282 | -22.726 | 60.322 | -27.554 | 1.00 | 50.88 | C   |
| ATOM | 5222 | O   | PRO | D | 282 | -22.601 | 60.743 | -28.694 | 1.00 | 54.40 | O   |
| ATOM | 5223 | CB  | PRO | D | 282 | -22.261 | 61.941 | -25.651 | 1.00 | 42.61 | C   |
| ATOM | 5224 | CG  | PRO | D | 282 | -22.923 | 62.088 | -24.282 | 1.00 | 40.54 | C   |
| ATOM | 5225 | CD  | PRO | D | 282 | -23.824 | 60.886 | -24.144 | 1.00 | 42.10 | C   |
| ATOM | 5226 | N   | VAL | D | 283 | -22.344 | 59.095 | -27.150 | 1.00 | 53.66 | N   |
| ATOM | 5227 | CA  | VAL | D | 283 | -21.719 | 58.084 | -28.043 | 1.00 | 52.12 | C   |
| ATOM | 5228 | C   | VAL | D | 283 | -22.746 | 57.574 | -29.071 | 1.00 | 48.43 | C   |
| ATOM | 5229 | O   | VAL | D | 283 | -22.401 | 57.393 | -30.228 | 1.00 | 43.63 | O   |
| ATOM | 5230 | CB  | VAL | D | 283 | -21.108 | 56.904 | -27.250 | 1.00 | 57.01 | C   |
| ATOM | 5231 | CG1 | VAL | D | 283 | -20.908 | 55.662 | -28.115 | 1.00 | 55.99 | C   |
| ATOM | 5232 | CG2 | VAL | D | 283 | -19.793 | 57.280 | -26.583 | 1.00 | 54.97 | C   |
| ATOM | 5233 | N   | ILE | D | 284 | -23.981 | 57.283 | -28.637 | 1.00 | 49.64 | N   |
| ATOM | 5234 | CA  | ILE | D | 284 | -25.041 | 56.823 | -29.561 | 1.00 | 51.21 | C   |
| ATOM | 5235 | C   | ILE | D | 284 | -25.409 | 57.934 | -30.546 | 1.00 | 53.16 | C   |
| ATOM | 5236 | O   | ILE | D | 284 | -25.613 | 57.674 | -31.725 | 1.00 | 60.36 | O   |
| ATOM | 5237 | CB  | ILE | D | 284 | -26.281 | 56.353 | -28.797 | 1.00 | 51.05 | C   |
| ATOM | 5238 | CG1 | ILE | D | 284 | -26.013 | 55.054 | -28.038 | 1.00 | 50.51 | C   |
| ATOM | 5239 | CG2 | ILE | D | 284 | -27.459 | 56.227 | -29.739 | 1.00 | 53.23 | C   |
| ATOM | 5240 | CD1 | ILE | D | 284 | -27.109 | 54.709 | -27.045 | 1.00 | 55.97 | C   |
| ATOM | 5241 | N   | ARG | D | 285 | -25.506 | 59.164 | -30.045 | 1.00 | 57.13 | N   |
| ATOM | 5242 | CA  | ARG | D | 285 | -25.886 | 60.299 | -30.870 | 1.00 | 60.73 | C   |
| ATOM | 5243 | C   | ARG | D | 285 | -24.790 | 60.605 | -31.895 | 1.00 | 61.64 | C   |
| ATOM | 5244 | O   | ARG | D | 285 | -25.132 | 60.998 | -33.005 | 1.00 | 65.73 | O   |
| ATOM | 5245 | CB  | ARG | D | 285 | -26.141 | 61.553 | -30.028 | 1.00 | 69.83 | C   |
| ATOM | 5246 | CG  | ARG | D | 285 | -27.584 | 61.748 | -29.598 | 1.00 | 69.40 | C   |
| ATOM | 5247 | CD  | ARG | D | 285 | -27.778 | 63.123 | -28.991 | 1.00 | 75.36 | C   |
| ATOM | 5248 | NE  | ARG | D | 285 | -28.856 | 63.106 | -28.012 | 1.00 | 78.25 | N   |
| ATOM | 5249 | CZ  | ARG | D | 285 | -30.108 | 62.740 | -28.285 | 1.00 | 81.06 | C   |
| ATOM | 5250 | NH1 | ARG | D | 285 | -30.408 | 62.186 | -29.451 | 1.00 | 83.38 | N1+ |
| ATOM | 5251 | NH2 | ARG | D | 285 | -31.061 | 62.934 | -27.392 | 1.00 | 69.51 | N   |
| ATOM | 5252 | N   | ARG | D | 286 | -23.502 | 60.459 | -31.520 | 1.00 | 59.71 | N   |
| ATOM | 5253 | CA  | ARG | D | 286 | -22.387 | 60.673 | -32.475 | 1.00 | 59.66 | C   |

|      |      |     |     |   |     |         |        |         |      |       |     |
|------|------|-----|-----|---|-----|---------|--------|---------|------|-------|-----|
| ATOM | 5254 | C   | ARG | D | 286 | -22.519 | 59.666 | -33.626 | 1.00 | 54.41 | C   |
| ATOM | 5255 | O   | ARG | D | 286 | -22.193 | 59.980 | -34.769 | 1.00 | 48.49 | O   |
| ATOM | 5256 | CB  | ARG | D | 286 | -20.990 | 60.568 | -31.843 | 1.00 | 66.93 | C   |
| ATOM | 5257 | CG  | ARG | D | 286 | -19.848 | 60.495 | -32.862 | 1.00 | 73.95 | C   |
| ATOM | 5258 | CD  | ARG | D | 286 | -18.513 | 61.114 | -32.464 | 1.00 | 77.09 | C   |
| ATOM | 5259 | NE  | ARG | D | 286 | -18.135 | 60.753 | -31.107 | 1.00 | 78.68 | N   |
| ATOM | 5260 | CZ  | ARG | D | 286 | -17.800 | 59.533 | -30.710 | 1.00 | 79.22 | C   |
| ATOM | 5261 | NH1 | ARG | D | 286 | -17.419 | 58.616 | -31.585 | 1.00 | 90.44 | N1+ |
| ATOM | 5262 | NH2 | ARG | D | 286 | -17.870 | 59.234 | -29.429 | 1.00 | 70.31 | N   |
| ATOM | 5263 | N   | ARG | D | 287 | -22.993 | 58.457 | -33.311 | 1.00 | 54.64 | N   |
| ATOM | 5264 | CA  | ARG | D | 287 | -23.138 | 57.407 | -34.310 | 1.00 | 60.67 | C   |
| ATOM | 5265 | C   | ARG | D | 287 | -24.352 | 57.691 | -35.210 | 1.00 | 55.77 | C   |
| ATOM | 5266 | O   | ARG | D | 287 | -24.250 | 57.526 | -36.437 | 1.00 | 44.82 | O   |
| ATOM | 5267 | CB  | ARG | D | 287 | -23.150 | 56.031 | -33.636 | 1.00 | 62.02 | C   |
| ATOM | 5268 | CG  | ARG | D | 287 | -21.865 | 55.255 | -33.892 | 1.00 | 66.55 | C   |
| ATOM | 5269 | CD  | ARG | D | 287 | -21.253 | 54.656 | -32.646 | 1.00 | 69.44 | C   |
| ATOM | 5270 | NE  | ARG | D | 287 | -19.817 | 54.478 | -32.757 | 1.00 | 64.89 | N   |
| ATOM | 5271 | CZ  | ARG | D | 287 | -19.021 | 54.326 | -31.711 | 1.00 | 69.91 | C   |
| ATOM | 5272 | NH1 | ARG | D | 287 | -19.553 | 54.084 | -30.526 | 1.00 | 71.79 | N1+ |
| ATOM | 5273 | NH2 | ARG | D | 287 | -17.710 | 54.418 | -31.850 | 1.00 | 69.49 | N   |
| ATOM | 5274 | N   | GLN | D | 288 | -25.465 | 58.136 | -34.616 | 1.00 | 53.24 | N   |
| ATOM | 5275 | CA  | GLN | D | 288 | -26.640 | 58.550 | -35.418 | 1.00 | 63.85 | C   |
| ATOM | 5276 | C   | GLN | D | 288 | -26.230 | 59.687 | -36.371 | 1.00 | 56.78 | C   |
| ATOM | 5277 | O   | GLN | D | 288 | -26.546 | 59.658 | -37.562 | 1.00 | 55.60 | O   |
| ATOM | 5278 | CB  | GLN | D | 288 | -27.839 | 58.922 | -34.536 | 1.00 | 61.31 | C   |
| ATOM | 5279 | CG  | GLN | D | 288 | -28.754 | 57.738 | -34.234 | 1.00 | 66.25 | C   |
| ATOM | 5280 | CD  | GLN | D | 288 | -29.353 | 57.793 | -32.848 | 1.00 | 75.36 | C   |
| ATOM | 5281 | NE2 | GLN | D | 288 | -29.682 | 56.627 | -32.312 | 1.00 | 68.07 | N   |
| ATOM | 5282 | OE1 | GLN | D | 288 | -29.525 | 58.865 | -32.259 | 1.00 | 83.17 | O   |
| ATOM | 5283 | N   | GLU | D | 289 | -25.477 | 60.658 | -35.857 | 1.00 | 54.86 | N   |
| ATOM | 5284 | CA  | GLU | D | 289 | -25.165 | 61.845 | -36.629 | 1.00 | 57.03 | C   |
| ATOM | 5285 | C   | GLU | D | 289 | -24.274 | 61.429 | -37.799 | 1.00 | 51.27 | C   |
| ATOM | 5286 | O   | GLU | D | 289 | -24.412 | 61.946 | -38.891 | 1.00 | 53.22 | O   |

|      |      |     |     |   |     |         |        |         |      |       |     |
|------|------|-----|-----|---|-----|---------|--------|---------|------|-------|-----|
| ATOM | 5287 | CB  | GLU | D | 289 | -24.537 | 62.926 | -35.744 | 1.00 | 60.65 | C   |
| ATOM | 5288 | CG  | GLU | D | 289 | -25.541 | 63.580 | -34.804 | 1.00 | 69.22 | C   |
| ATOM | 5289 | CD  | GLU | D | 289 | -24.957 | 64.441 | -33.693 | 1.00 | 80.15 | C   |
| ATOM | 5290 | OE1 | GLU | D | 289 | -23.750 | 64.773 | -33.780 | 1.00 | 86.34 | O   |
| ATOM | 5291 | OE2 | GLU | D | 289 | -25.711 | 64.778 | -32.739 | 1.00 | 81.25 | O1- |
| ATOM | 5292 | N   | CYS | D | 290 | -23.376 | 60.476 | -37.536 | 1.00 | 53.65 | N   |
| ATOM | 5293 | CA  | CYS | D | 290 | -22.385 | 59.987 | -38.492 | 1.00 | 50.53 | C   |
| ATOM | 5294 | C   | CYS | D | 290 | -23.095 | 59.278 | -39.660 | 1.00 | 50.73 | C   |
| ATOM | 5295 | O   | CYS | D | 290 | -22.657 | 59.404 | -40.826 | 1.00 | 42.37 | O   |
| ATOM | 5296 | CB  | CYS | D | 290 | -21.384 | 59.055 | -37.809 | 1.00 | 53.18 | C   |
| ATOM | 5297 | SG  | CYS | D | 290 | -19.877 | 59.859 | -37.194 | 1.00 | 49.02 | S   |
| ATOM | 5298 | N   | ALA | D | 291 | -24.170 | 58.546 | -39.322 | 1.00 | 47.11 | N   |
| ATOM | 5299 | CA  | ALA | D | 291 | -25.059 | 57.846 | -40.264 | 1.00 | 54.22 | C   |
| ATOM | 5300 | C   | ALA | D | 291 | -25.706 | 58.837 | -41.233 | 1.00 | 54.27 | C   |
| ATOM | 5301 | O   | ALA | D | 291 | -25.572 | 58.688 | -42.462 | 1.00 | 50.09 | O   |
| ATOM | 5302 | CB  | ALA | D | 291 | -26.125 | 57.070 | -39.509 | 1.00 | 56.80 | C   |
| ATOM | 5303 | N   | GLU | D | 292 | -26.431 | 59.815 | -40.674 | 1.00 | 60.27 | N   |
| ATOM | 5304 | CA  | GLU | D | 292 | -27.106 | 60.877 | -41.464 | 1.00 | 66.20 | C   |
| ATOM | 5305 | C   | GLU | D | 292 | -26.158 | 61.416 | -42.553 | 1.00 | 58.22 | C   |
| ATOM | 5306 | O   | GLU | D | 292 | -26.529 | 61.596 | -43.710 | 1.00 | 61.05 | O   |
| ATOM | 5307 | CB  | GLU | D | 292 | -27.587 | 62.002 | -40.541 | 1.00 | 70.60 | C   |
| ATOM | 5308 | CG  | GLU | D | 292 | -28.814 | 61.638 | -39.717 | 1.00 | 72.27 | C   |
| ATOM | 5309 | CD  | GLU | D | 292 | -30.050 | 61.322 | -40.542 | 1.00 | 81.50 | C   |
| ATOM | 5310 | OE1 | GLU | D | 292 | -30.086 | 61.703 | -41.742 | 1.00 | 80.93 | O   |
| ATOM | 5311 | OE2 | GLU | D | 292 | -30.976 | 60.693 | -39.985 | 1.00 | 84.11 | O1- |
| ATOM | 5312 | N   | GLN | D | 293 | -24.911 | 61.672 | -42.177 | 1.00 | 51.67 | N   |
| ATOM | 5313 | CA  | GLN | D | 293 | -23.911 | 62.170 | -43.111 | 1.00 | 55.70 | C   |
| ATOM | 5314 | C   | GLN | D | 293 | -23.750 | 61.166 | -44.263 | 1.00 | 60.76 | C   |
| ATOM | 5315 | O   | GLN | D | 293 | -23.734 | 61.538 | -45.445 | 1.00 | 62.78 | O   |
| ATOM | 5316 | CB  | GLN | D | 293 | -22.585 | 62.365 | -42.374 | 1.00 | 50.00 | C   |
| ATOM | 5317 | CG  | GLN | D | 293 | -21.541 | 63.121 | -43.170 | 1.00 | 50.85 | C   |
| ATOM | 5318 | CD  | GLN | D | 293 | -21.889 | 64.584 | -43.293 | 1.00 | 54.36 | C   |
| ATOM | 5319 | NE2 | GLN | D | 293 | -21.191 | 65.258 | -44.186 | 1.00 | 54.09 | N   |

|      |      |     |     |   |     |         |        |         |      |       |     |
|------|------|-----|-----|---|-----|---------|--------|---------|------|-------|-----|
| ATOM | 5320 | OE1 | GLN | D | 293 | -22.777 | 65.101 | -42.612 | 1.00 | 52.08 | O   |
| ATOM | 5321 | N   | MET | D | 294 | -23.598 | 59.895 | -43.866 | 1.00 | 62.52 | N   |
| ATOM | 5322 | CA  | MET | D | 294 | -23.390 | 58.775 | -44.722 | 1.00 | 57.27 | C   |
| ATOM | 5323 | C   | MET | D | 294 | -24.540 | 58.738 | -45.730 | 1.00 | 56.28 | C   |
| ATOM | 5324 | O   | MET | D | 294 | -24.322 | 58.736 | -46.947 | 1.00 | 51.60 | O   |
| ATOM | 5325 | CB  | MET | D | 294 | -23.330 | 57.484 | -43.890 | 1.00 | 60.16 | C   |
| ATOM | 5326 | CG  | MET | D | 294 | -23.126 | 56.200 | -44.689 | 1.00 | 58.23 | C   |
| ATOM | 5327 | SD  | MET | D | 294 | -21.598 | 56.168 | -45.674 | 1.00 | 57.25 | S   |
| ATOM | 5328 | CE  | MET | D | 294 | -20.468 | 55.594 | -44.408 | 1.00 | 61.52 | C   |
| ATOM | 5329 | N   | TYR | D | 295 | -25.761 | 58.783 | -45.206 | 1.00 | 55.79 | N   |
| ATOM | 5330 | CA  | TYR | D | 295 | -26.969 | 58.797 | -46.049 | 1.00 | 59.91 | C   |
| ATOM | 5331 | C   | TYR | D | 295 | -26.898 | 59.947 | -47.072 | 1.00 | 59.44 | C   |
| ATOM | 5332 | O   | TYR | D | 295 | -26.934 | 59.707 | -48.278 | 1.00 | 63.11 | O   |
| ATOM | 5333 | CB  | TYR | D | 295 | -28.215 | 58.876 | -45.165 | 1.00 | 51.30 | C   |
| ATOM | 5334 | CG  | TYR | D | 295 | -28.348 | 57.741 | -44.178 | 1.00 | 53.28 | C   |
| ATOM | 5335 | CD1 | TYR | D | 295 | -27.570 | 56.592 | -44.283 | 1.00 | 47.94 | C   |
| ATOM | 5336 | CD2 | TYR | D | 295 | -29.298 | 57.790 | -43.164 | 1.00 | 50.82 | C   |
| ATOM | 5337 | CE1 | TYR | D | 295 | -27.727 | 55.536 | -43.404 | 1.00 | 43.29 | C   |
| ATOM | 5338 | CE2 | TYR | D | 295 | -29.463 | 56.739 | -42.277 | 1.00 | 46.86 | C   |
| ATOM | 5339 | CZ  | TYR | D | 295 | -28.670 | 55.614 | -42.400 | 1.00 | 42.03 | C   |
| ATOM | 5340 | OH  | TYR | D | 295 | -28.800 | 54.586 | -41.522 | 1.00 | 48.01 | O   |
| ATOM | 5341 | N   | ARG | D | 296 | -26.743 | 61.174 | -46.576 | 1.00 | 57.90 | N   |
| ATOM | 5342 | CA  | ARG | D | 296 | -26.734 | 62.377 | -47.392 | 1.00 | 65.87 | C   |
| ATOM | 5343 | C   | ARG | D | 296 | -25.678 | 62.260 | -48.497 | 1.00 | 61.34 | C   |
| ATOM | 5344 | O   | ARG | D | 296 | -25.878 | 62.719 | -49.609 | 1.00 | 58.66 | O   |
| ATOM | 5345 | CB  | ARG | D | 296 | -26.471 | 63.623 | -46.533 | 1.00 | 73.57 | C   |
| ATOM | 5346 | CG  | ARG | D | 296 | -27.689 | 64.146 | -45.777 | 1.00 | 78.13 | C   |
| ATOM | 5347 | CD  | ARG | D | 296 | -27.479 | 65.570 | -45.275 | 1.00 | 84.70 | C   |
| ATOM | 5348 | NE  | ARG | D | 296 | -26.491 | 65.642 | -44.204 | 1.00 | 85.23 | N   |
| ATOM | 5349 | CZ  | ARG | D | 296 | -26.785 | 65.667 | -42.907 | 1.00 | 83.81 | C   |
| ATOM | 5350 | NH1 | ARG | D | 296 | -28.035 | 65.864 | -42.525 | 1.00 | 80.92 | N1+ |
| ATOM | 5351 | NH2 | ARG | D | 296 | -25.841 | 65.465 | -42.001 | 1.00 | 76.65 | N   |
| ATOM | 5352 | N   | GLY | D | 297 | -24.530 | 61.668 | -48.182 | 1.00 | 61.06 | N   |



|      |      |     |     |   |     |         |        |         |      |       |   |
|------|------|-----|-----|---|-----|---------|--------|---------|------|-------|---|
| ATOM | 5353 | CA  | GLY | D | 297 | -23.479 | 61.527 | -49.174 | 1.00 | 57.08 | C |
| ATOM | 5354 | C   | GLY | D | 297 | -23.830 | 60.475 | -50.209 | 1.00 | 55.70 | C |
| ATOM | 5355 | O   | GLY | D | 297 | -23.427 | 60.602 | -51.361 | 1.00 | 52.91 | O |
| ATOM | 5356 | N   | LEU | D | 298 | -24.543 | 59.426 | -49.771 | 1.00 | 57.47 | N |
| ATOM | 5357 | CA  | LEU | D | 298 | -24.993 | 58.317 | -50.646 | 1.00 | 65.51 | C |
| ATOM | 5358 | C   | LEU | D | 298 | -26.083 | 58.848 | -51.588 | 1.00 | 65.72 | C |
| ATOM | 5359 | O   | LEU | D | 298 | -26.023 | 58.623 | -52.801 | 1.00 | 58.91 | O |
| ATOM | 5360 | CB  | LEU | D | 298 | -25.486 | 57.112 | -49.823 | 1.00 | 58.66 | C |
| ATOM | 5361 | CG  | LEU | D | 298 | -24.395 | 56.236 | -49.181 | 1.00 | 56.42 | C |
| ATOM | 5362 | CD1 | LEU | D | 298 | -24.988 | 55.149 | -48.297 | 1.00 | 56.84 | C |
| ATOM | 5363 | CD2 | LEU | D | 298 | -23.483 | 55.608 | -50.215 | 1.00 | 53.46 | C |
| ATOM | 5364 | N   | GLN | D | 299 | -27.045 | 59.582 | -51.024 | 1.00 | 62.80 | N |
| ATOM | 5365 | CA  | GLN | D | 299 | -28.034 | 60.313 | -51.806 | 1.00 | 66.64 | C |
| ATOM | 5366 | C   | GLN | D | 299 | -27.379 | 61.070 | -52.970 | 1.00 | 66.05 | C |
| ATOM | 5367 | O   | GLN | D | 299 | -27.754 | 60.872 | -54.109 | 1.00 | 79.35 | O |
| ATOM | 5368 | CB  | GLN | D | 299 | -28.769 | 61.334 | -50.948 | 1.00 | 66.09 | C |
| ATOM | 5369 | CG  | GLN | D | 299 | -29.839 | 62.089 | -51.719 | 1.00 | 66.19 | C |
| ATOM | 5370 | CD  | GLN | D | 299 | -30.683 | 62.888 | -50.765 | 1.00 | 64.71 | C |
| ATOM | 5371 | NE2 | GLN | D | 299 | -30.103 | 63.930 | -50.186 | 1.00 | 64.13 | N |
| ATOM | 5372 | OE1 | GLN | D | 299 | -31.826 | 62.542 | -50.511 | 1.00 | 69.17 | O |
| ATOM | 5373 | N   | ALA | D | 300 | -26.390 | 61.919 | -52.673 | 1.00 | 61.23 | N |
| ATOM | 5374 | CA  | ALA | D | 300 | -25.782 | 62.811 | -53.669 | 1.00 | 59.82 | C |
| ATOM | 5375 | C   | ALA | D | 300 | -24.993 | 62.019 | -54.714 | 1.00 | 60.67 | C |
| ATOM | 5376 | O   | ALA | D | 300 | -24.487 | 62.588 | -55.671 | 1.00 | 60.06 | O |
| ATOM | 5377 | CB  | ALA | D | 300 | -24.886 | 63.819 | -52.993 | 1.00 | 58.73 | C |
| ATOM | 5378 | N   | MET | D | 301 | -24.856 | 60.712 | -54.493 | 1.00 | 66.83 | N |
| ATOM | 5379 | CA  | MET | D | 301 | -24.038 | 59.845 | -55.322 | 1.00 | 67.79 | C |
| ATOM | 5380 | C   | MET | D | 301 | -24.919 | 59.006 | -56.265 | 1.00 | 62.09 | C |
| ATOM | 5381 | O   | MET | D | 301 | -24.405 | 58.371 | -57.177 | 1.00 | 56.01 | O |
| ATOM | 5382 | CB  | MET | D | 301 | -23.228 | 58.921 | -54.410 | 1.00 | 71.88 | C |
| ATOM | 5383 | CG  | MET | D | 301 | -21.746 | 59.005 | -54.638 | 1.00 | 74.65 | C |
| ATOM | 5384 | SD  | MET | D | 301 | -20.847 | 58.558 | -53.151 | 1.00 | 83.35 | S |
| ATOM | 5385 | CE  | MET | D | 301 | -19.317 | 58.032 | -53.923 | 1.00 | 79.00 | C |

|      |      |     |     |   |     |         |        |         |      |       |     |
|------|------|-----|-----|---|-----|---------|--------|---------|------|-------|-----|
| ATOM | 5386 | N   | GLY | D | 302 | -26.238 | 59.010 | -56.015 | 1.00 | 60.66 | N   |
| ATOM | 5387 | CA  | GLY | D | 302 | -27.215 | 58.264 | -56.766 | 1.00 | 56.94 | C   |
| ATOM | 5388 | C   | GLY | D | 302 | -27.228 | 56.795 | -56.392 | 1.00 | 61.35 | C   |
| ATOM | 5389 | O   | GLY | D | 302 | -27.705 | 55.969 | -57.160 | 1.00 | 70.60 | O   |
| ATOM | 5390 | N   | LEU | D | 303 | -26.725 | 56.459 | -55.201 | 1.00 | 59.31 | N   |
| ATOM | 5391 | CA  | LEU | D | 303 | -26.703 | 55.064 | -54.754 | 1.00 | 61.20 | C   |
| ATOM | 5392 | C   | LEU | D | 303 | -27.820 | 54.836 | -53.737 | 1.00 | 54.49 | C   |
| ATOM | 5393 | O   | LEU | D | 303 | -28.212 | 55.747 | -53.000 | 1.00 | 52.02 | O   |
| ATOM | 5394 | CB  | LEU | D | 303 | -25.326 | 54.733 | -54.175 | 1.00 | 63.51 | C   |
| ATOM | 5395 | CG  | LEU | D | 303 | -24.178 | 54.890 | -55.170 | 1.00 | 62.35 | C   |
| ATOM | 5396 | CD1 | LEU | D | 303 | -22.860 | 55.153 | -54.458 | 1.00 | 61.83 | C   |
| ATOM | 5397 | CD2 | LEU | D | 303 | -24.087 | 53.673 | -56.073 | 1.00 | 63.78 | C   |
| ATOM | 5398 | N   | GLU | D | 304 | -28.351 | 53.615 | -53.757 | 1.00 | 50.27 | N   |
| ATOM | 5399 | CA  | GLU | D | 304 | -29.484 | 53.265 | -52.937 | 1.00 | 57.25 | C   |
| ATOM | 5400 | C   | GLU | D | 304 | -28.994 | 52.385 | -51.783 | 1.00 | 52.85 | C   |
| ATOM | 5401 | O   | GLU | D | 304 | -27.856 | 51.992 | -51.741 | 1.00 | 49.49 | O   |
| ATOM | 5402 | CB  | GLU | D | 304 | -30.555 | 52.554 | -53.771 | 1.00 | 61.73 | C   |
| ATOM | 5403 | CG  | GLU | D | 304 | -31.096 | 53.396 | -54.913 | 1.00 | 67.52 | C   |
| ATOM | 5404 | CD  | GLU | D | 304 | -32.326 | 52.840 | -55.613 | 1.00 | 70.89 | C   |
| ATOM | 5405 | OE1 | GLU | D | 304 | -32.198 | 51.853 | -56.377 | 1.00 | 63.57 | O   |
| ATOM | 5406 | OE2 | GLU | D | 304 | -33.410 | 53.404 | -55.392 | 1.00 | 74.50 | O1- |
| ATOM | 5407 | N   | ILE | D | 305 | -29.906 | 52.073 | -50.865 | 1.00 | 56.90 | N   |
| ATOM | 5408 | CA  | ILE | D | 305 | -29.598 | 51.441 | -49.608 | 1.00 | 56.17 | C   |
| ATOM | 5409 | C   | ILE | D | 305 | -30.599 | 50.302 | -49.420 | 1.00 | 53.88 | C   |
| ATOM | 5410 | O   | ILE | D | 305 | -31.795 | 50.541 | -49.376 | 1.00 | 58.48 | O   |
| ATOM | 5411 | CB  | ILE | D | 305 | -29.657 | 52.490 | -48.472 | 1.00 | 61.90 | C   |
| ATOM | 5412 | CG1 | ILE | D | 305 | -28.472 | 53.464 | -48.532 | 1.00 | 63.06 | C   |
| ATOM | 5413 | CG2 | ILE | D | 305 | -29.786 | 51.834 | -47.104 | 1.00 | 62.23 | C   |
| ATOM | 5414 | CD1 | ILE | D | 305 | -28.734 | 54.790 | -47.849 | 1.00 | 66.38 | C   |
| ATOM | 5415 | N   | PHE | D | 306 | -30.080 | 49.079 | -49.269 | 1.00 | 55.76 | N   |
| ATOM | 5416 | CA  | PHE | D | 306 | -30.865 | 47.843 | -49.182 | 1.00 | 58.60 | C   |
| ATOM | 5417 | C   | PHE | D | 306 | -32.154 | 48.048 | -48.376 | 1.00 | 56.61 | C   |
| ATOM | 5418 | O   | PHE | D | 306 | -33.203 | 47.582 | -48.802 | 1.00 | 68.99 | O   |

|      |      |     |     |   |     |         |        |         |      |       |     |
|------|------|-----|-----|---|-----|---------|--------|---------|------|-------|-----|
| ATOM | 5419 | CB  | PHE | D | 306 | -30.037 | 46.706 | -48.571 | 1.00 | 59.86 | C   |
| ATOM | 5420 | CG  | PHE | D | 306 | -30.752 | 45.377 | -48.539 | 1.00 | 53.11 | C   |
| ATOM | 5421 | CD1 | PHE | D | 306 | -30.978 | 44.671 | -49.707 | 1.00 | 48.88 | C   |
| ATOM | 5422 | CD2 | PHE | D | 306 | -31.199 | 44.839 | -47.344 | 1.00 | 49.76 | C   |
| ATOM | 5423 | CE1 | PHE | D | 306 | -31.640 | 43.452 | -49.688 | 1.00 | 48.36 | C   |
| ATOM | 5424 | CE2 | PHE | D | 306 | -31.840 | 43.606 | -47.325 | 1.00 | 56.43 | C   |
| ATOM | 5425 | CZ  | PHE | D | 306 | -32.066 | 42.915 | -48.498 | 1.00 | 51.62 | C   |
| ATOM | 5426 | N   | VAL | D | 307 | -32.049 | 48.691 | -47.208 | 1.00 | 53.01 | N   |
| ATOM | 5427 | CA  | VAL | D | 307 | -33.195 | 49.001 | -46.366 | 1.00 | 58.98 | C   |
| ATOM | 5428 | C   | VAL | D | 307 | -33.625 | 50.443 | -46.662 | 1.00 | 65.74 | C   |
| ATOM | 5429 | O   | VAL | D | 307 | -33.055 | 51.390 | -46.122 | 1.00 | 61.05 | O   |
| ATOM | 5430 | CB  | VAL | D | 307 | -32.879 | 48.807 | -44.875 | 1.00 | 56.23 | C   |
| ATOM | 5431 | CG1 | VAL | D | 307 | -34.066 | 49.204 | -44.016 | 1.00 | 58.69 | C   |
| ATOM | 5432 | CG2 | VAL | D | 307 | -32.430 | 47.387 | -44.561 | 1.00 | 56.02 | C   |
| ATOM | 5433 | N   | LYS | D | 308 | -34.628 | 50.586 | -47.536 | 1.00 | 74.98 | N   |
| ATOM | 5434 | CA  | LYS | D | 308 | -35.029 | 51.884 | -48.079 | 1.00 | 75.14 | C   |
| ATOM | 5435 | C   | LYS | D | 308 | -35.578 | 52.748 | -46.936 | 1.00 | 69.98 | C   |
| ATOM | 5436 | O   | LYS | D | 308 | -35.120 | 53.864 | -46.755 | 1.00 | 67.24 | O   |
| ATOM | 5437 | CB  | LYS | D | 308 | -35.994 | 51.688 | -49.255 | 1.00 | 81.84 | C   |
| ATOM | 5438 | CG  | LYS | D | 308 | -35.354 | 51.070 | -50.497 | 1.00 | 85.48 | C   |
| ATOM | 5439 | CD  | LYS | D | 308 | -36.173 | 49.956 | -51.153 | 1.00 | 93.13 | C   |
| ATOM | 5440 | CE  | LYS | D | 308 | -35.334 | 48.758 | -51.557 | 1.00 | 93.24 | C   |
| ATOM | 5441 | NZ  | LYS | D | 308 | -35.855 | 48.121 | -52.787 | 1.00 | 91.77 | N1+ |
| ATOM | 5442 | N   | ASP | D | 309 | -36.506 | 52.201 | -46.144 | 1.00 | 68.15 | N   |
| ATOM | 5443 | CA  | ASP | D | 309 | -37.148 | 52.917 | -45.022 | 1.00 | 75.01 | C   |
| ATOM | 5444 | C   | ASP | D | 309 | -36.091 | 53.373 | -44.006 | 1.00 | 92.44 | C   |
| ATOM | 5445 | O   | ASP | D | 309 | -35.503 | 52.549 | -43.293 | 1.00 | 91.23 | O   |
| ATOM | 5446 | CB  | ASP | D | 309 | -38.196 | 52.011 | -44.365 | 1.00 | 77.99 | C   |
| ATOM | 5447 | CG  | ASP | D | 309 | -39.176 | 52.710 | -43.440 | 1.00 | 76.58 | C   |
| ATOM | 5448 | OD1 | ASP | D | 309 | -38.921 | 53.867 | -43.062 | 1.00 | 73.10 | O   |
| ATOM | 5449 | OD2 | ASP | D | 309 | -40.202 | 52.085 | -43.126 | 1.00 | 83.42 | O1- |
| ATOM | 5450 | N   | PRO | D | 310 | -35.795 | 54.694 | -43.896 | 1.00 | 83.95 | N   |
| ATOM | 5451 | CA  | PRO | D | 310 | -34.876 | 55.192 | -42.867 | 1.00 | 70.80 | C   |

|      |      |     |     |   |     |         |        |         |      |       |     |
|------|------|-----|-----|---|-----|---------|--------|---------|------|-------|-----|
| ATOM | 5452 | C   | PRO | D | 310 | -35.262 | 54.841 | -41.421 | 1.00 | 67.54 | C   |
| ATOM | 5453 | O   | PRO | D | 310 | -34.392 | 54.615 | -40.598 | 1.00 | 69.39 | O   |
| ATOM | 5454 | CB  | PRO | D | 310 | -34.888 | 56.713 | -43.102 | 1.00 | 73.05 | C   |
| ATOM | 5455 | CG  | PRO | D | 310 | -35.227 | 56.851 | -44.570 | 1.00 | 73.01 | C   |
| ATOM | 5456 | CD  | PRO | D | 310 | -36.253 | 55.762 | -44.801 | 1.00 | 76.77 | C   |
| ATOM | 5457 | N   | GLU | D | 311 | -36.560 | 54.769 | -41.134 | 1.00 | 70.61 | N   |
| ATOM | 5458 | CA  | GLU | D | 311 | -37.080 | 54.432 | -39.793 | 1.00 | 76.01 | C   |
| ATOM | 5459 | C   | GLU | D | 311 | -36.450 | 53.161 | -39.193 | 1.00 | 72.22 | C   |
| ATOM | 5460 | O   | GLU | D | 311 | -36.496 | 52.998 | -37.987 | 1.00 | 77.96 | O   |
| ATOM | 5461 | CB  | GLU | D | 311 | -38.589 | 54.193 | -39.867 | 1.00 | 82.48 | C   |
| ATOM | 5462 | CG  | GLU | D | 311 | -39.408 | 55.465 | -39.938 | 1.00 | 82.26 | C   |
| ATOM | 5463 | CD  | GLU | D | 311 | -39.717 | 56.058 | -38.579 | 1.00 | 86.97 | C   |
| ATOM | 5464 | OE1 | GLU | D | 311 | -40.253 | 57.185 | -38.554 | 1.00 | 76.51 | O   |
| ATOM | 5465 | OE2 | GLU | D | 311 | -39.424 | 55.383 | -37.549 | 1.00 | 86.03 | O1- |
| ATOM | 5466 | N   | TYR | D | 312 | -35.942 | 52.240 | -40.026 | 1.00 | 70.42 | N   |
| ATOM | 5467 | CA  | TYR | D | 312 | -35.569 | 50.884 | -39.592 | 1.00 | 69.41 | C   |
| ATOM | 5468 | C   | TYR | D | 312 | -34.100 | 50.559 | -39.905 | 1.00 | 65.26 | C   |
| ATOM | 5469 | O   | TYR | D | 312 | -33.712 | 49.400 | -39.837 | 1.00 | 57.18 | O   |
| ATOM | 5470 | CB  | TYR | D | 312 | -36.470 | 49.843 | -40.265 | 1.00 | 75.17 | C   |
| ATOM | 5471 | CG  | TYR | D | 312 | -37.930 | 49.931 | -39.904 | 1.00 | 76.52 | C   |
| ATOM | 5472 | CD1 | TYR | D | 312 | -38.325 | 50.210 | -38.605 | 1.00 | 80.01 | C   |
| ATOM | 5473 | CD2 | TYR | D | 312 | -38.920 | 49.727 | -40.852 | 1.00 | 77.73 | C   |
| ATOM | 5474 | CE1 | TYR | D | 312 | -39.663 | 50.296 | -38.258 | 1.00 | 85.64 | C   |
| ATOM | 5475 | CE2 | TYR | D | 312 | -40.265 | 49.802 | -40.518 | 1.00 | 78.95 | C   |
| ATOM | 5476 | CZ  | TYR | D | 312 | -40.638 | 50.090 | -39.217 | 1.00 | 77.63 | C   |
| ATOM | 5477 | OH  | TYR | D | 312 | -41.947 | 50.170 | -38.849 | 1.00 | 70.83 | O   |
| ATOM | 5478 | N   | ARG | D | 313 | -33.287 | 51.577 | -40.216 | 1.00 | 56.70 | N   |
| ATOM | 5479 | CA  | ARG | D | 313 | -31.906 | 51.361 | -40.555 | 1.00 | 59.22 | C   |
| ATOM | 5480 | C   | ARG | D | 313 | -31.112 | 51.245 | -39.246 | 1.00 | 61.86 | C   |
| ATOM | 5481 | O   | ARG | D | 313 | -31.467 | 51.856 | -38.235 | 1.00 | 65.39 | O   |
| ATOM | 5482 | CB  | ARG | D | 313 | -31.405 | 52.451 | -41.511 | 1.00 | 64.12 | C   |
| ATOM | 5483 | CG  | ARG | D | 313 | -32.075 | 52.406 | -42.882 | 1.00 | 66.55 | C   |
| ATOM | 5484 | CD  | ARG | D | 313 | -31.413 | 53.183 | -44.018 | 1.00 | 68.35 | C   |

|      |      |     |     |   |     |         |        |         |      |       |     |
|------|------|-----|-----|---|-----|---------|--------|---------|------|-------|-----|
| ATOM | 5485 | NE  | ARG | D | 313 | -31.935 | 54.536 | -44.206 | 1.00 | 70.94 | N   |
| ATOM | 5486 | CZ  | ARG | D | 313 | -31.925 | 55.230 | -45.344 | 1.00 | 69.42 | C   |
| ATOM | 5487 | NH1 | ARG | D | 313 | -31.850 | 54.627 | -46.517 | 1.00 | 66.90 | N1+ |
| ATOM | 5488 | NH2 | ARG | D | 313 | -31.952 | 56.548 | -45.295 | 1.00 | 72.03 | N   |
| ATOM | 5489 | N   | LEU | D | 314 | -30.109 | 50.358 | -39.268 | 1.00 | 59.45 | N   |
| ATOM | 5490 | CA  | LEU | D | 314 | -29.080 | 50.238 | -38.237 | 1.00 | 55.94 | C   |
| ATOM | 5491 | C   | LEU | D | 314 | -27.951 | 51.209 | -38.587 | 1.00 | 61.87 | C   |
| ATOM | 5492 | O   | LEU | D | 314 | -27.274 | 51.041 | -39.614 | 1.00 | 54.78 | O   |
| ATOM | 5493 | CB  | LEU | D | 314 | -28.591 | 48.784 | -38.183 | 1.00 | 54.49 | C   |
| ATOM | 5494 | CG  | LEU | D | 314 | -27.259 | 48.500 | -37.482 | 1.00 | 52.36 | C   |
| ATOM | 5495 | CD1 | LEU | D | 314 | -27.301 | 48.847 | -36.002 | 1.00 | 54.45 | C   |
| ATOM | 5496 | CD2 | LEU | D | 314 | -26.875 | 47.041 | -37.652 | 1.00 | 49.90 | C   |
| ATOM | 5497 | N   | PRO | D | 315 | -27.740 | 52.259 | -37.750 | 1.00 | 54.79 | N   |
| ATOM | 5498 | CA  | PRO | D | 315 | -26.767 | 53.303 | -38.054 | 1.00 | 50.60 | C   |
| ATOM | 5499 | C   | PRO | D | 315 | -25.336 | 52.772 | -38.232 | 1.00 | 46.65 | C   |
| ATOM | 5500 | O   | PRO | D | 315 | -24.567 | 53.404 | -38.947 | 1.00 | 46.80 | O   |
| ATOM | 5501 | CB  | PRO | D | 315 | -26.852 | 54.303 | -36.875 | 1.00 | 53.20 | C   |
| ATOM | 5502 | CG  | PRO | D | 315 | -27.689 | 53.634 | -35.810 | 1.00 | 50.75 | C   |
| ATOM | 5503 | CD  | PRO | D | 315 | -28.455 | 52.511 | -36.486 | 1.00 | 53.65 | C   |
| ATOM | 5504 | N   | THR | D | 316 | -25.011 | 51.614 | -37.637 | 1.00 | 44.91 | N   |
| ATOM | 5505 | CA  | THR | D | 316 | -23.621 | 51.128 | -37.601 | 1.00 | 48.25 | C   |
| ATOM | 5506 | C   | THR | D | 316 | -23.230 | 50.457 | -38.928 | 1.00 | 49.79 | C   |
| ATOM | 5507 | O   | THR | D | 316 | -22.038 | 50.488 | -39.305 | 1.00 | 46.02 | O   |
| ATOM | 5508 | CB  | THR | D | 316 | -23.388 | 50.229 | -36.382 | 1.00 | 50.01 | C   |
| ATOM | 5509 | CG2 | THR | D | 316 | -23.585 | 50.966 | -35.072 | 1.00 | 50.58 | C   |
| ATOM | 5510 | OG1 | THR | D | 316 | -24.303 | 49.138 | -36.456 | 1.00 | 48.67 | O   |
| ATOM | 5511 | N   | VAL | D | 317 | -24.219 | 49.903 | -39.646 | 1.00 | 46.40 | N   |
| ATOM | 5512 | CA  | VAL | D | 317 | -23.976 | 49.168 | -40.897 | 1.00 | 47.88 | C   |
| ATOM | 5513 | C   | VAL | D | 317 | -24.984 | 49.618 | -41.961 | 1.00 | 47.41 | C   |
| ATOM | 5514 | O   | VAL | D | 317 | -26.220 | 49.534 | -41.747 | 1.00 | 51.26 | O   |
| ATOM | 5515 | CB  | VAL | D | 317 | -24.062 | 47.644 | -40.688 | 1.00 | 51.43 | C   |
| ATOM | 5516 | CG1 | VAL | D | 317 | -23.628 | 46.884 | -41.933 | 1.00 | 54.11 | C   |
| ATOM | 5517 | CG2 | VAL | D | 317 | -23.243 | 47.180 | -39.492 | 1.00 | 52.68 | C   |

|      |      |     |     |   |     |         |        |         |      |       |   |
|------|------|-----|-----|---|-----|---------|--------|---------|------|-------|---|
| ATOM | 5518 | N   | THR | D | 318 | -24.444 | 50.037 | -43.112 | 1.00 | 40.02 | N |
| ATOM | 5519 | CA  | THR | D | 318 | -25.200 | 50.615 | -44.212 | 1.00 | 48.21 | C |
| ATOM | 5520 | C   | THR | D | 318 | -24.897 | 49.803 | -45.488 | 1.00 | 51.52 | C |
| ATOM | 5521 | O   | THR | D | 318 | -23.745 | 49.856 | -46.010 | 1.00 | 45.85 | O |
| ATOM | 5522 | CB  | THR | D | 318 | -24.840 | 52.101 | -44.412 | 1.00 | 50.07 | C |
| ATOM | 5523 | CG2 | THR | D | 318 | -25.572 | 52.715 | -45.585 | 1.00 | 54.42 | C |
| ATOM | 5524 | OG1 | THR | D | 318 | -25.113 | 52.896 | -43.253 | 1.00 | 51.33 | O |
| ATOM | 5525 | N   | CYS | D | 319 | -25.900 | 49.062 | -45.999 | 1.00 | 52.01 | N |
| ATOM | 5526 | CA  | CYS | D | 319 | -25.707 | 48.231 | -47.204 | 1.00 | 51.75 | C |
| ATOM | 5527 | C   | CYS | D | 319 | -26.059 | 49.033 | -48.466 | 1.00 | 51.78 | C |
| ATOM | 5528 | O   | CYS | D | 319 | -27.197 | 49.437 | -48.670 | 1.00 | 56.00 | O |
| ATOM | 5529 | CB  | CYS | D | 319 | -26.504 | 46.944 | -47.107 | 1.00 | 53.66 | C |
| ATOM | 5530 | SG  | CYS | D | 319 | -26.094 | 46.008 | -45.617 | 1.00 | 59.81 | S |
| ATOM | 5531 | N   | ILE | D | 320 | -25.044 | 49.248 | -49.297 | 1.00 | 47.39 | N |
| ATOM | 5532 | CA  | ILE | D | 320 | -25.045 | 50.164 | -50.417 | 1.00 | 46.96 | C |
| ATOM | 5533 | C   | ILE | D | 320 | -25.169 | 49.323 | -51.693 | 1.00 | 55.95 | C |
| ATOM | 5534 | O   | ILE | D | 320 | -24.188 | 48.628 | -52.060 | 1.00 | 58.89 | O |
| ATOM | 5535 | CB  | ILE | D | 320 | -23.723 | 50.957 | -50.438 | 1.00 | 46.60 | C |
| ATOM | 5536 | CG1 | ILE | D | 320 | -23.481 | 51.717 | -49.128 | 1.00 | 48.35 | C |
| ATOM | 5537 | CG2 | ILE | D | 320 | -23.634 | 51.876 | -51.656 | 1.00 | 44.76 | C |
| ATOM | 5538 | CD1 | ILE | D | 320 | -22.075 | 52.270 | -48.991 | 1.00 | 44.21 | C |
| ATOM | 5539 | N   | MET | D | 321 | -26.331 | 49.394 | -52.360 | 1.00 | 53.57 | N |
| ATOM | 5540 | CA  | MET | D | 321 | -26.613 | 48.546 | -53.514 | 1.00 | 56.27 | C |
| ATOM | 5541 | C   | MET | D | 321 | -25.540 | 48.764 | -54.593 | 1.00 | 60.95 | C |
| ATOM | 5542 | O   | MET | D | 321 | -25.127 | 49.886 | -54.856 | 1.00 | 53.82 | O |
| ATOM | 5543 | CB  | MET | D | 321 | -27.986 | 48.863 | -54.096 | 1.00 | 55.35 | C |
| ATOM | 5544 | CG  | MET | D | 321 | -29.108 | 48.754 | -53.084 | 1.00 | 59.55 | C |
| ATOM | 5545 | SD  | MET | D | 321 | -29.216 | 47.163 | -52.225 | 1.00 | 60.67 | S |
| ATOM | 5546 | CE  | MET | D | 321 | -28.976 | 45.976 | -53.549 | 1.00 | 59.75 | C |
| ATOM | 5547 | N   | ILE | D | 322 | -25.042 | 47.672 | -55.176 | 1.00 | 60.22 | N |
| ATOM | 5548 | CA  | ILE | D | 322 | -24.199 | 47.785 | -56.348 | 1.00 | 68.59 | C |
| ATOM | 5549 | C   | ILE | D | 322 | -25.112 | 48.165 | -57.511 | 1.00 | 71.15 | C |
| ATOM | 5550 | O   | ILE | D | 322 | -26.082 | 47.466 | -57.782 | 1.00 | 74.85 | O |

|      |      |     |     |   |     |         |        |         |      |       |     |
|------|------|-----|-----|---|-----|---------|--------|---------|------|-------|-----|
| ATOM | 5551 | CB  | ILE | D | 322 | -23.434 | 46.474 | -56.622 | 1.00 | 72.90 | C   |
| ATOM | 5552 | CG1 | ILE | D | 322 | -22.679 | 45.976 | -55.385 | 1.00 | 80.18 | C   |
| ATOM | 5553 | CG2 | ILE | D | 322 | -22.499 | 46.624 | -57.819 | 1.00 | 69.76 | C   |
| ATOM | 5554 | CD1 | ILE | D | 322 | -22.254 | 44.520 | -55.455 | 1.00 | 79.39 | C   |
| ATOM | 5555 | N   | PRO | D | 323 | -24.861 | 49.273 | -58.238 | 1.00 | 75.50 | N   |
| ATOM | 5556 | CA  | PRO | D | 323 | -25.670 | 49.595 | -59.413 | 1.00 | 75.12 | C   |
| ATOM | 5557 | C   | PRO | D | 323 | -25.376 | 48.593 | -60.543 | 1.00 | 73.57 | C   |
| ATOM | 5558 | O   | PRO | D | 323 | -24.260 | 48.019 | -60.588 | 1.00 | 57.28 | O   |
| ATOM | 5559 | CB  | PRO | D | 323 | -25.242 | 51.031 | -59.764 | 1.00 | 73.41 | C   |
| ATOM | 5560 | CG  | PRO | D | 323 | -23.821 | 51.126 | -59.248 | 1.00 | 78.08 | C   |
| ATOM | 5561 | CD  | PRO | D | 323 | -23.783 | 50.246 | -58.011 | 1.00 | 78.97 | C   |
| ATOM | 5562 | N   | LYS | D | 324 | -26.360 | 48.412 | -61.442 | 1.00 | 68.28 | N   |
| ATOM | 5563 | CA  | LYS | D | 324 | -26.299 | 47.398 | -62.494 | 1.00 | 67.98 | C   |
| ATOM | 5564 | C   | LYS | D | 324 | -25.044 | 47.620 | -63.355 | 1.00 | 67.33 | C   |
| ATOM | 5565 | O   | LYS | D | 324 | -24.822 | 48.688 | -63.921 | 1.00 | 68.32 | O   |
| ATOM | 5566 | CB  | LYS | D | 324 | -27.612 | 47.380 | -63.287 | 1.00 | 78.94 | C   |
| ATOM | 5567 | CG  | LYS | D | 324 | -28.687 | 46.442 | -62.725 | 1.00 | 90.96 | C   |
| ATOM | 5568 | CD  | LYS | D | 324 | -30.152 | 46.842 | -62.996 | 1.00 | 91.63 | C   |
| ATOM | 5569 | CE  | LYS | D | 324 | -30.931 | 45.879 | -63.877 | 1.00 | 90.08 | C   |
| ATOM | 5570 | NZ  | LYS | D | 324 | -30.974 | 46.327 | -65.292 | 1.00 | 88.85 | N1+ |
| ATOM | 5571 | N   | GLY | D | 325 | -24.181 | 46.602 | -63.391 | 1.00 | 60.99 | N   |
| ATOM | 5572 | CA  | GLY | D | 325 | -23.043 | 46.573 | -64.281 | 1.00 | 62.25 | C   |
| ATOM | 5573 | C   | GLY | D | 325 | -21.742 | 46.981 | -63.620 | 1.00 | 64.44 | C   |
| ATOM | 5574 | O   | GLY | D | 325 | -20.745 | 47.209 | -64.305 | 1.00 | 68.80 | O   |
| ATOM | 5575 | N   | VAL | D | 326 | -21.723 | 47.061 | -62.289 | 1.00 | 66.66 | N   |
| ATOM | 5576 | CA  | VAL | D | 326 | -20.509 | 47.499 | -61.613 | 1.00 | 68.53 | C   |
| ATOM | 5577 | C   | VAL | D | 326 | -19.908 | 46.303 | -60.868 | 1.00 | 65.91 | C   |
| ATOM | 5578 | O   | VAL | D | 326 | -20.596 | 45.637 | -60.090 | 1.00 | 69.61 | O   |
| ATOM | 5579 | CB  | VAL | D | 326 | -20.769 | 48.714 | -60.699 | 1.00 | 73.28 | C   |
| ATOM | 5580 | CG1 | VAL | D | 326 | -19.664 | 48.888 | -59.665 | 1.00 | 73.93 | C   |
| ATOM | 5581 | CG2 | VAL | D | 326 | -20.964 | 49.999 | -61.503 | 1.00 | 63.71 | C   |
| ATOM | 5582 | N   | ASN | D | 327 | -18.622 | 46.052 | -61.147 | 1.00 | 61.50 | N   |
| ATOM | 5583 | CA  | ASN | D | 327 | -17.804 | 45.016 | -60.528 | 1.00 | 60.66 | C   |

|      |      |     |     |   |     |         |        |         |      |        |   |
|------|------|-----|-----|---|-----|---------|--------|---------|------|--------|---|
| ATOM | 5584 | C   | ASN | D | 327 | -17.298 | 45.489 | -59.148 | 1.00 | 64.13  | C |
| ATOM | 5585 | O   | ASN | D | 327 | -16.246 | 46.165 | -59.055 | 1.00 | 59.36  | O |
| ATOM | 5586 | CB  | ASN | D | 327 | -16.650 | 44.639 | -61.462 | 1.00 | 65.62  | C |
| ATOM | 5587 | CG  | ASN | D | 327 | -15.728 | 43.563 | -60.922 | 1.00 | 61.60  | C |
| ATOM | 5588 | ND2 | ASN | D | 327 | -14.893 | 43.013 | -61.787 | 1.00 | 53.70  | N |
| ATOM | 5589 | OD1 | ASN | D | 327 | -15.746 | 43.248 | -59.734 | 1.00 | 62.30  | O |
| ATOM | 5590 | N   | TRP | D | 328 | -18.013 | 45.060 | -58.090 | 1.00 | 61.25  | N |
| ATOM | 5591 | CA  | TRP | D | 328 | -17.827 | 45.506 | -56.707 | 1.00 | 59.21  | C |
| ATOM | 5592 | C   | TRP | D | 328 | -16.436 | 45.125 | -56.188 | 1.00 | 66.13  | C |
| ATOM | 5593 | O   | TRP | D | 328 | -15.798 | 45.951 | -55.516 | 1.00 | 67.95  | O |
| ATOM | 5594 | CB  | TRP | D | 328 | -18.921 | 44.957 | -55.783 | 1.00 | 58.73  | C |
| ATOM | 5595 | CG  | TRP | D | 328 | -18.703 | 43.527 | -55.389 | 1.00 | 64.85  | C |
| ATOM | 5596 | CD1 | TRP | D | 328 | -19.246 | 42.422 | -55.970 | 1.00 | 59.67  | C |
| ATOM | 5597 | CD2 | TRP | D | 328 | -17.851 | 43.046 | -54.333 | 1.00 | 66.69  | C |
| ATOM | 5598 | CE2 | TRP | D | 328 | -17.945 | 41.639 | -54.340 | 1.00 | 66.25  | C |
| ATOM | 5599 | CE3 | TRP | D | 328 | -17.025 | 43.664 | -53.385 | 1.00 | 64.39  | C |
| ATOM | 5600 | NE1 | TRP | D | 328 | -18.796 | 41.290 | -55.352 | 1.00 | 60.40  | N |
| ATOM | 5601 | CZ2 | TRP | D | 328 | -17.240 | 40.842 | -53.439 | 1.00 | 67.95  | C |
| ATOM | 5602 | CZ3 | TRP | D | 328 | -16.327 | 42.881 | -52.492 | 1.00 | 65.90  | C |
| ATOM | 5603 | CH2 | TRP | D | 328 | -16.437 | 41.488 | -52.520 | 1.00 | 72.21  | C |
| ATOM | 5604 | N   | TRP | D | 329 | -15.969 | 43.898 | -56.475 | 1.00 | 64.54  | N |
| ATOM | 5605 | CA  | TRP | D | 329 | -14.649 | 43.516 | -56.011 | 1.00 | 63.80  | C |
| ATOM | 5606 | C   | TRP | D | 329 | -13.652 | 44.581 | -56.473 | 1.00 | 60.79  | C |
| ATOM | 5607 | O   | TRP | D | 329 | -12.755 | 44.932 | -55.717 | 1.00 | 66.27  | O |
| ATOM | 5608 | CB  | TRP | D | 329 | -14.191 | 42.102 | -56.425 | 1.00 | 66.72  | C |
| ATOM | 5609 | CG  | TRP | D | 329 | -12.710 | 41.901 | -56.237 | 1.00 | 78.37  | C |
| ATOM | 5610 | CD1 | TRP | D | 329 | -11.753 | 41.877 | -57.218 | 1.00 | 78.92  | C |
| ATOM | 5611 | CD2 | TRP | D | 329 | -11.990 | 41.802 | -54.985 | 1.00 | 92.30  | C |
| ATOM | 5612 | CE2 | TRP | D | 329 | -10.612 | 41.699 | -55.307 | 1.00 | 93.24  | C |
| ATOM | 5613 | CE3 | TRP | D | 329 | -12.365 | 41.798 | -53.629 | 1.00 | 94.12  | C |
| ATOM | 5614 | NE1 | TRP | D | 329 | -10.500 | 41.743 | -56.673 | 1.00 | 79.85  | N |
| ATOM | 5615 | CZ2 | TRP | D | 329 | -9.626  | 41.582 | -54.322 | 1.00 | 101.07 | C |
| ATOM | 5616 | CZ3 | TRP | D | 329 | -11.388 | 41.688 | -52.657 | 1.00 | 96.03  | C |



|      |      |     |     |   |     |         |        |         |      |        |     |
|------|------|-----|-----|---|-----|---------|--------|---------|------|--------|-----|
| ATOM | 5617 | CH2 | TRP | D | 329 | -10.037 | 41.579 | -53.003 | 1.00 | 100.87 | C   |
| ATOM | 5618 | N   | LYS | D | 330 | -13.799 | 45.092 | -57.700 | 1.00 | 61.44  | N   |
| ATOM | 5619 | CA  | LYS | D | 330 | -12.725 | 45.951 | -58.275 | 1.00 | 67.92  | C   |
| ATOM | 5620 | C   | LYS | D | 330 | -12.733 | 47.325 | -57.582 | 1.00 | 58.94  | C   |
| ATOM | 5621 | O   | LYS | D | 330 | -11.680 | 47.895 | -57.353 | 1.00 | 45.03  | O   |
| ATOM | 5622 | CB  | LYS | D | 330 | -12.794 | 46.026 | -59.811 | 1.00 | 73.49  | C   |
| ATOM | 5623 | CG  | LYS | D | 330 | -12.073 | 44.884 | -60.535 | 1.00 | 75.20  | C   |
| ATOM | 5624 | CD  | LYS | D | 330 | -11.645 | 45.175 | -61.974 | 1.00 | 77.51  | C   |
| ATOM | 5625 | CE  | LYS | D | 330 | -12.748 | 44.965 | -62.996 | 1.00 | 76.34  | C   |
| ATOM | 5626 | NZ  | LYS | D | 330 | -12.235 | 45.006 | -64.386 | 1.00 | 72.10  | N1+ |
| ATOM | 5627 | N   | VAL | D | 331 | -13.915 | 47.833 | -57.224 | 1.00 | 55.76  | N   |
| ATOM | 5628 | CA  | VAL | D | 331 | -14.010 | 49.054 | -56.455 | 1.00 | 57.44  | C   |
| ATOM | 5629 | C   | VAL | D | 331 | -13.205 | 48.878 | -55.158 | 1.00 | 56.14  | C   |
| ATOM | 5630 | O   | VAL | D | 331 | -12.206 | 49.600 | -54.952 | 1.00 | 59.40  | O   |
| ATOM | 5631 | CB  | VAL | D | 331 | -15.476 | 49.442 | -56.191 | 1.00 | 57.81  | C   |
| ATOM | 5632 | CG1 | VAL | D | 331 | -15.602 | 50.544 | -55.150 | 1.00 | 56.89  | C   |
| ATOM | 5633 | CG2 | VAL | D | 331 | -16.156 | 49.859 | -57.486 | 1.00 | 61.48  | C   |
| ATOM | 5634 | N   | SER | D | 332 | -13.595 | 47.888 | -54.339 | 1.00 | 52.76  | N   |
| ATOM | 5635 | CA  | SER | D | 332 | -12.954 | 47.585 | -53.032 | 1.00 | 51.50  | C   |
| ATOM | 5636 | C   | SER | D | 332 | -11.424 | 47.499 | -53.168 | 1.00 | 52.81  | C   |
| ATOM | 5637 | O   | SER | D | 332 | -10.702 | 48.121 | -52.380 | 1.00 | 60.17  | O   |
| ATOM | 5638 | CB  | SER | D | 332 | -13.508 | 46.321 | -52.417 | 1.00 | 51.98  | C   |
| ATOM | 5639 | OG  | SER | D | 332 | -14.859 | 46.484 | -52.007 | 1.00 | 52.45  | O   |
| ATOM | 5640 | N   | GLU | D | 333 | -10.951 | 46.770 | -54.189 | 1.00 | 47.42  | N   |
| ATOM | 5641 | CA  | GLU | D | 333 | -9.531  | 46.514 | -54.446 | 1.00 | 53.85  | C   |
| ATOM | 5642 | C   | GLU | D | 333 | -8.753  | 47.817 | -54.710 | 1.00 | 61.39  | C   |
| ATOM | 5643 | O   | GLU | D | 333 | -7.603  | 47.989 | -54.216 | 1.00 | 58.29  | O   |
| ATOM | 5644 | CB  | GLU | D | 333 | -9.394  | 45.580 | -55.648 | 1.00 | 60.51  | C   |
| ATOM | 5645 | CG  | GLU | D | 333 | -8.031  | 44.928 | -55.763 | 1.00 | 65.50  | C   |
| ATOM | 5646 | CD  | GLU | D | 333 | -7.614  | 44.551 | -57.172 | 1.00 | 71.14  | C   |
| ATOM | 5647 | OE1 | GLU | D | 333 | -8.365  | 44.857 | -58.129 | 1.00 | 70.55  | O   |
| ATOM | 5648 | OE2 | GLU | D | 333 | -6.525  | 43.960 | -57.309 | 1.00 | 81.77  | O1- |
| ATOM | 5649 | N   | TYR | D | 334 | -9.341  | 48.710 | -55.522 | 1.00 | 57.20  | N   |

|      |      |     |     |   |     |         |        |         |      |       |   |
|------|------|-----|-----|---|-----|---------|--------|---------|------|-------|---|
| ATOM | 5650 | CA  | TYR | D | 334 | -8.765  | 50.021 | -55.745 | 1.00 | 58.06 | C |
| ATOM | 5651 | C   | TYR | D | 334 | -8.694  | 50.788 | -54.414 | 1.00 | 51.68 | C |
| ATOM | 5652 | O   | TYR | D | 334 | -7.637  | 51.252 | -54.057 | 1.00 | 54.05 | O |
| ATOM | 5653 | CB  | TYR | D | 334 | -9.544  | 50.804 | -56.800 | 1.00 | 58.88 | C |
| ATOM | 5654 | CG  | TYR | D | 334 | -8.820  | 52.038 | -57.270 | 1.00 | 59.53 | C |
| ATOM | 5655 | CD1 | TYR | D | 334 | -7.844  | 51.968 | -58.253 | 1.00 | 59.06 | C |
| ATOM | 5656 | CD2 | TYR | D | 334 | -9.092  | 53.276 | -56.709 | 1.00 | 61.86 | C |
| ATOM | 5657 | CE1 | TYR | D | 334 | -7.174  | 53.106 | -58.684 | 1.00 | 62.75 | C |
| ATOM | 5658 | CE2 | TYR | D | 334 | -8.436  | 54.425 | -57.126 | 1.00 | 57.40 | C |
| ATOM | 5659 | CZ  | TYR | D | 334 | -7.481  | 54.338 | -58.121 | 1.00 | 61.60 | C |
| ATOM | 5660 | OH  | TYR | D | 334 | -6.846  | 55.469 | -58.523 | 1.00 | 54.10 | O |
| ATOM | 5661 | N   | ALA | D | 335 | -9.799  | 50.850 | -53.666 | 1.00 | 47.53 | N |
| ATOM | 5662 | CA  | ALA | D | 335 | -9.873  | 51.608 | -52.388 | 1.00 | 53.73 | C |
| ATOM | 5663 | C   | ALA | D | 335 | -8.751  | 51.218 | -51.402 | 1.00 | 61.50 | C |
| ATOM | 5664 | O   | ALA | D | 335 | -8.064  | 52.112 | -50.856 | 1.00 | 59.56 | O |
| ATOM | 5665 | CB  | ALA | D | 335 | -11.224 | 51.434 | -51.758 | 1.00 | 51.44 | C |
| ATOM | 5666 | N   | MET | D | 336 | -8.557  | 49.904 | -51.184 | 1.00 | 60.00 | N |
| ATOM | 5667 | CA  | MET | D | 336 | -7.506  | 49.373 | -50.298 | 1.00 | 52.13 | C |
| ATOM | 5668 | C   | MET | D | 336 | -6.119  | 49.795 | -50.799 | 1.00 | 54.65 | C |
| ATOM | 5669 | O   | MET | D | 336 | -5.316  | 50.306 | -50.020 | 1.00 | 64.28 | O |
| ATOM | 5670 | CB  | MET | D | 336 | -7.547  | 47.842 | -50.218 | 1.00 | 49.50 | C |
| ATOM | 5671 | CG  | MET | D | 336 | -6.458  | 47.229 | -49.307 | 1.00 | 50.11 | C |
| ATOM | 5672 | SD  | MET | D | 336 | -6.429  | 47.838 | -47.564 | 1.00 | 46.31 | S |
| ATOM | 5673 | CE  | MET | D | 336 | -8.185  | 47.722 | -47.194 | 1.00 | 44.18 | C |
| ATOM | 5674 | N   | ASN | D | 337 | -5.842  | 49.572 | -52.090 | 1.00 | 58.46 | N |
| ATOM | 5675 | CA  | ASN | D | 337 | -4.491  | 49.737 | -52.653 | 1.00 | 57.42 | C |
| ATOM | 5676 | C   | ASN | D | 337 | -4.147  | 51.217 | -52.772 | 1.00 | 56.48 | C |
| ATOM | 5677 | O   | ASN | D | 337 | -2.956  | 51.565 | -52.778 | 1.00 | 53.48 | O |
| ATOM | 5678 | CB  | ASN | D | 337 | -4.323  | 49.107 | -54.040 | 1.00 | 60.32 | C |
| ATOM | 5679 | CG  | ASN | D | 337 | -4.486  | 47.603 | -54.023 | 1.00 | 59.73 | C |
| ATOM | 5680 | ND2 | ASN | D | 337 | -4.733  | 47.011 | -55.174 | 1.00 | 58.85 | N |
| ATOM | 5681 | OD1 | ASN | D | 337 | -4.400  | 46.980 | -52.973 | 1.00 | 63.35 | O |
| ATOM | 5682 | N   | ASN | D | 338 | -5.183  | 52.061 | -52.891 | 1.00 | 54.83 | N |

|      |      |     |     |   |     |         |        |         |      |       |   |
|------|------|-----|-----|---|-----|---------|--------|---------|------|-------|---|
| ATOM | 5683 | CA  | ASN | D | 338 | -4.996  | 53.476 | -53.182 | 1.00 | 55.02 | C |
| ATOM | 5684 | C   | ASN | D | 338 | -5.144  | 54.290 | -51.891 | 1.00 | 55.16 | C |
| ATOM | 5685 | O   | ASN | D | 338 | -4.314  | 55.159 | -51.673 | 1.00 | 55.82 | O |
| ATOM | 5686 | CB  | ASN | D | 338 | -5.858  | 53.941 | -54.370 | 1.00 | 53.56 | C |
| ATOM | 5687 | CG  | ASN | D | 338 | -5.112  | 53.831 | -55.691 | 1.00 | 53.04 | C |
| ATOM | 5688 | ND2 | ASN | D | 338 | -4.660  | 54.963 | -56.214 | 1.00 | 55.92 | N |
| ATOM | 5689 | OD1 | ASN | D | 338 | -4.904  | 52.737 | -56.222 | 1.00 | 47.49 | O |
| ATOM | 5690 | N   | PHE | D | 339 | -6.134  | 53.970 | -51.039 | 1.00 | 54.43 | N |
| ATOM | 5691 | CA  | PHE | D | 339 | -6.434  | 54.756 | -49.812 | 1.00 | 52.29 | C |
| ATOM | 5692 | C   | PHE | D | 339 | -6.306  | 53.951 | -48.501 | 1.00 | 52.61 | C |
| ATOM | 5693 | O   | PHE | D | 339 | -6.642  | 54.480 | -47.409 | 1.00 | 43.96 | O |
| ATOM | 5694 | CB  | PHE | D | 339 | -7.845  | 55.323 | -49.903 | 1.00 | 49.77 | C |
| ATOM | 5695 | CG  | PHE | D | 339 | -8.064  | 56.123 | -51.153 | 1.00 | 56.26 | C |
| ATOM | 5696 | CD1 | PHE | D | 339 | -7.722  | 57.466 | -51.206 | 1.00 | 56.29 | C |
| ATOM | 5697 | CD2 | PHE | D | 339 | -8.585  | 55.525 | -52.291 | 1.00 | 61.43 | C |
| ATOM | 5698 | CE1 | PHE | D | 339 | -7.915  | 58.199 | -52.363 | 1.00 | 55.53 | C |
| ATOM | 5699 | CE2 | PHE | D | 339 | -8.768  | 56.257 | -53.453 | 1.00 | 58.65 | C |
| ATOM | 5700 | CZ  | PHE | D | 339 | -8.430  | 57.591 | -53.488 | 1.00 | 56.64 | C |
| ATOM | 5701 | N   | SER | D | 340 | -5.833  | 52.698 | -48.576 | 1.00 | 45.48 | N |
| ATOM | 5702 | CA  | SER | D | 340 | -5.714  | 51.862 | -47.388 | 1.00 | 46.92 | C |
| ATOM | 5703 | C   | SER | D | 340 | -7.067  | 51.767 | -46.677 | 1.00 | 42.88 | C |
| ATOM | 5704 | O   | SER | D | 340 | -7.089  | 51.621 | -45.472 | 1.00 | 45.02 | O |
| ATOM | 5705 | CB  | SER | D | 340 | -4.650  | 52.394 | -46.432 | 1.00 | 48.75 | C |
| ATOM | 5706 | OG  | SER | D | 340 | -3.458  | 51.624 | -46.497 | 1.00 | 54.39 | O |
| ATOM | 5707 | N   | LEU | D | 341 | -8.171  | 51.880 | -47.422 | 1.00 | 40.29 | N |
| ATOM | 5708 | CA  | LEU | D | 341 | -9.523  | 51.897 | -46.856 | 1.00 | 42.19 | C |
| ATOM | 5709 | C   | LEU | D | 341 | -10.220 | 50.563 | -47.147 | 1.00 | 45.35 | C |
| ATOM | 5710 | O   | LEU | D | 341 | -10.199 | 50.127 | -48.298 | 1.00 | 43.46 | O |
| ATOM | 5711 | CB  | LEU | D | 341 | -10.323 | 53.047 | -47.480 | 1.00 | 43.60 | C |
| ATOM | 5712 | CG  | LEU | D | 341 | -11.842 | 52.928 | -47.335 | 1.00 | 47.00 | C |
| ATOM | 5713 | CD1 | LEU | D | 341 | -12.253 | 53.077 | -45.889 | 1.00 | 47.88 | C |
| ATOM | 5714 | CD2 | LEU | D | 341 | -12.578 | 53.947 | -48.188 | 1.00 | 49.11 | C |
| ATOM | 5715 | N   | GLU | D | 342 | -10.828 | 49.955 | -46.106 | 1.00 | 47.16 | N |

|      |      |     |     |   |     |         |        |         |      |       |     |
|------|------|-----|-----|---|-----|---------|--------|---------|------|-------|-----|
| ATOM | 5716 | CA  | GLU | D | 342 | -11.669 | 48.740 | -46.200 | 1.00 | 46.82 | C   |
| ATOM | 5717 | C   | GLU | D | 342 | -13.069 | 49.139 | -46.670 | 1.00 | 47.91 | C   |
| ATOM | 5718 | O   | GLU | D | 342 | -13.852 | 49.659 | -45.873 | 1.00 | 47.97 | O   |
| ATOM | 5719 | CB  | GLU | D | 342 | -11.764 | 48.009 | -44.846 | 1.00 | 48.28 | C   |
| ATOM | 5720 | CG  | GLU | D | 342 | -12.779 | 46.851 | -44.758 | 1.00 | 44.03 | C   |
| ATOM | 5721 | CD  | GLU | D | 342 | -12.402 | 45.518 | -45.410 | 1.00 | 45.90 | C   |
| ATOM | 5722 | OE1 | GLU | D | 342 | -11.395 | 45.459 | -46.160 | 1.00 | 42.79 | O   |
| ATOM | 5723 | OE2 | GLU | D | 342 | -13.134 | 44.518 | -45.179 | 1.00 | 47.44 | O1- |
| ATOM | 5724 | N   | ILE | D | 343 | -13.377 | 48.844 | -47.943 | 1.00 | 49.69 | N   |
| ATOM | 5725 | CA  | ILE | D | 343 | -14.764 | 48.823 | -48.461 | 1.00 | 48.46 | C   |
| ATOM | 5726 | C   | ILE | D | 343 | -15.204 | 47.364 | -48.622 | 1.00 | 45.78 | C   |
| ATOM | 5727 | O   | ILE | D | 343 | -14.856 | 46.685 | -49.592 | 1.00 | 44.89 | O   |
| ATOM | 5728 | CB  | ILE | D | 343 | -14.910 | 49.594 | -49.789 | 1.00 | 50.58 | C   |
| ATOM | 5729 | CG1 | ILE | D | 343 | -14.282 | 50.986 | -49.711 | 1.00 | 49.99 | C   |
| ATOM | 5730 | CG2 | ILE | D | 343 | -16.380 | 49.659 | -50.183 | 1.00 | 53.78 | C   |
| ATOM | 5731 | CD1 | ILE | D | 343 | -14.399 | 51.778 | -50.974 | 1.00 | 49.97 | C   |
| ATOM | 5732 | N   | GLN | D | 344 | -15.988 | 46.891 | -47.665 | 1.00 | 47.79 | N   |
| ATOM | 5733 | CA  | GLN | D | 344 | -16.238 | 45.479 | -47.531 | 1.00 | 52.35 | C   |
| ATOM | 5734 | C   | GLN | D | 344 | -17.389 | 45.110 | -48.467 | 1.00 | 51.50 | C   |
| ATOM | 5735 | O   | GLN | D | 344 | -18.386 | 45.845 | -48.554 | 1.00 | 50.61 | O   |
| ATOM | 5736 | CB  | GLN | D | 344 | -16.541 | 45.114 | -46.074 | 1.00 | 53.80 | C   |
| ATOM | 5737 | CG  | GLN | D | 344 | -16.963 | 43.663 | -45.876 | 1.00 | 60.50 | C   |
| ATOM | 5738 | CD  | GLN | D | 344 | -16.142 | 42.907 | -44.855 | 1.00 | 63.63 | C   |
| ATOM | 5739 | NE2 | GLN | D | 344 | -15.479 | 41.869 | -45.327 | 1.00 | 59.66 | N   |
| ATOM | 5740 | OE1 | GLN | D | 344 | -16.095 | 43.235 | -43.666 | 1.00 | 73.09 | O   |
| ATOM | 5741 | N   | GLY | D | 345 | -17.241 | 43.953 | -49.124 | 1.00 | 48.49 | N   |
| ATOM | 5742 | CA  | GLY | D | 345 | -18.298 | 43.350 | -49.935 | 1.00 | 47.11 | C   |
| ATOM | 5743 | C   | GLY | D | 345 | -19.502 | 42.945 | -49.109 | 1.00 | 40.98 | C   |
| ATOM | 5744 | O   | GLY | D | 345 | -19.499 | 43.115 | -47.905 | 1.00 | 51.57 | O   |
| ATOM | 5745 | N   | GLY | D | 346 | -20.511 | 42.371 | -49.775 | 1.00 | 44.83 | N   |
| ATOM | 5746 | CA  | GLY | D | 346 | -21.783 | 41.920 | -49.142 | 1.00 | 46.20 | C   |
| ATOM | 5747 | C   | GLY | D | 346 | -21.667 | 40.530 | -48.544 | 1.00 | 45.91 | C   |
| ATOM | 5748 | O   | GLY | D | 346 | -20.626 | 39.865 | -48.706 | 1.00 | 43.53 | O   |

|      |      |     |     |   |     |         |        |         |      |       |   |
|------|------|-----|-----|---|-----|---------|--------|---------|------|-------|---|
| ATOM | 5749 | N   | PHE | D | 347 | -22.748 | 40.094 | -47.880 | 1.00 | 43.77 | N |
| ATOM | 5750 | CA  | PHE | D | 347 | -22.753 | 38.880 | -47.082 | 1.00 | 44.53 | C |
| ATOM | 5751 | C   | PHE | D | 347 | -24.193 | 38.490 | -46.725 | 1.00 | 43.46 | C |
| ATOM | 5752 | O   | PHE | D | 347 | -25.013 | 39.333 | -46.404 | 1.00 | 39.09 | O |
| ATOM | 5753 | CB  | PHE | D | 347 | -21.879 | 39.052 | -45.834 | 1.00 | 46.17 | C |
| ATOM | 5754 | CG  | PHE | D | 347 | -21.846 | 37.861 | -44.900 | 1.00 | 50.58 | C |
| ATOM | 5755 | CD1 | PHE | D | 347 | -21.228 | 36.673 | -45.286 | 1.00 | 50.30 | C |
| ATOM | 5756 | CD2 | PHE | D | 347 | -22.424 | 37.926 | -43.633 | 1.00 | 49.37 | C |
| ATOM | 5757 | CE1 | PHE | D | 347 | -21.210 | 35.573 | -44.436 | 1.00 | 49.77 | C |
| ATOM | 5758 | CE2 | PHE | D | 347 | -22.395 | 36.831 | -42.784 | 1.00 | 50.92 | C |
| ATOM | 5759 | CZ  | PHE | D | 347 | -21.796 | 35.651 | -43.190 | 1.00 | 48.75 | C |
| ATOM | 5760 | N   | GLY | D | 348 | -24.482 | 37.181 | -46.797 | 1.00 | 49.30 | N |
| ATOM | 5761 | CA  | GLY | D | 348 | -25.796 | 36.625 | -46.456 | 1.00 | 47.63 | C |
| ATOM | 5762 | C   | GLY | D | 348 | -26.831 | 37.142 | -47.437 | 1.00 | 48.55 | C |
| ATOM | 5763 | O   | GLY | D | 348 | -26.541 | 37.168 | -48.630 | 1.00 | 43.81 | O |
| ATOM | 5764 | N   | PRO | D | 349 | -27.995 | 37.660 | -46.975 | 1.00 | 55.31 | N |
| ATOM | 5765 | CA  | PRO | D | 349 | -29.020 | 38.197 | -47.880 | 1.00 | 56.79 | C |
| ATOM | 5766 | C   | PRO | D | 349 | -28.558 | 39.339 | -48.806 | 1.00 | 63.04 | C |
| ATOM | 5767 | O   | PRO | D | 349 | -29.197 | 39.612 | -49.812 | 1.00 | 64.74 | O |
| ATOM | 5768 | CB  | PRO | D | 349 | -30.104 | 38.737 | -46.931 | 1.00 | 57.22 | C |
| ATOM | 5769 | CG  | PRO | D | 349 | -29.401 | 38.901 | -45.597 | 1.00 | 56.25 | C |
| ATOM | 5770 | CD  | PRO | D | 349 | -28.382 | 37.783 | -45.560 | 1.00 | 55.43 | C |
| ATOM | 5771 | N   | THR | D | 350 | -27.436 | 39.978 | -48.470 | 1.00 | 63.54 | N |
| ATOM | 5772 | CA  | THR | D | 350 | -26.923 | 41.103 | -49.227 | 1.00 | 62.57 | C |
| ATOM | 5773 | C   | THR | D | 350 | -25.730 | 40.679 | -50.104 | 1.00 | 49.94 | C |
| ATOM | 5774 | O   | THR | D | 350 | -25.083 | 41.520 | -50.693 | 1.00 | 49.53 | O |
| ATOM | 5775 | CB  | THR | D | 350 | -26.622 | 42.251 | -48.247 | 1.00 | 63.44 | C |
| ATOM | 5776 | CG2 | THR | D | 350 | -25.231 | 42.201 | -47.656 | 1.00 | 56.58 | C |
| ATOM | 5777 | OG1 | THR | D | 350 | -26.802 | 43.499 | -48.915 | 1.00 | 67.98 | O |
| ATOM | 5778 | N   | MET | D | 351 | -25.453 | 39.379 | -50.194 | 1.00 | 47.14 | N |
| ATOM | 5779 | CA  | MET | D | 351 | -24.337 | 38.826 | -51.002 | 1.00 | 51.77 | C |
| ATOM | 5780 | C   | MET | D | 351 | -24.543 | 39.108 | -52.507 | 1.00 | 56.41 | C |
| ATOM | 5781 | O   | MET | D | 351 | -25.641 | 38.906 | -53.094 | 1.00 | 59.98 | O |

|      |      |     |     |   |     |         |        |         |      |       |   |
|------|------|-----|-----|---|-----|---------|--------|---------|------|-------|---|
| ATOM | 5782 | CB  | MET | D | 351 | -24.243 | 37.311 | -50.766 | 1.00 | 61.35 | C |
| ATOM | 5783 | CG  | MET | D | 351 | -23.495 | 36.513 | -51.836 | 1.00 | 67.67 | C |
| ATOM | 5784 | SD  | MET | D | 351 | -21.708 | 36.515 | -51.558 | 1.00 | 83.58 | S |
| ATOM | 5785 | CE  | MET | D | 351 | -21.073 | 36.728 | -53.227 | 1.00 | 85.33 | C |
| ATOM | 5786 | N   | GLY | D | 352 | -23.474 | 39.570 | -53.156 | 1.00 | 50.98 | N |
| ATOM | 5787 | CA  | GLY | D | 352 | -23.430 | 39.745 | -54.600 | 1.00 | 50.70 | C |
| ATOM | 5788 | C   | GLY | D | 352 | -24.021 | 41.072 | -55.076 | 1.00 | 52.42 | C |
| ATOM | 5789 | O   | GLY | D | 352 | -23.761 | 41.458 | -56.229 | 1.00 | 47.65 | O |
| ATOM | 5790 | N   | ILE | D | 353 | -24.777 | 41.775 | -54.208 | 1.00 | 55.73 | N |
| ATOM | 5791 | CA  | ILE | D | 353 | -25.626 | 42.928 | -54.602 | 1.00 | 60.68 | C |
| ATOM | 5792 | C   | ILE | D | 353 | -25.308 | 44.231 | -53.840 | 1.00 | 65.94 | C |
| ATOM | 5793 | O   | ILE | D | 353 | -25.749 | 45.299 | -54.289 | 1.00 | 69.88 | O |
| ATOM | 5794 | CB  | ILE | D | 353 | -27.114 | 42.564 | -54.450 | 1.00 | 56.51 | C |
| ATOM | 5795 | CG1 | ILE | D | 353 | -27.539 | 42.480 | -52.986 | 1.00 | 62.41 | C |
| ATOM | 5796 | CG2 | ILE | D | 353 | -27.417 | 41.285 | -55.203 | 1.00 | 55.20 | C |
| ATOM | 5797 | CD1 | ILE | D | 353 | -29.007 | 42.146 | -52.781 | 1.00 | 62.84 | C |
| ATOM | 5798 | N   | ALA | D | 354 | -24.575 | 44.176 | -52.714 | 1.00 | 65.92 | N |
| ATOM | 5799 | CA  | ALA | D | 354 | -24.374 | 45.372 | -51.857 | 1.00 | 62.99 | C |
| ATOM | 5800 | C   | ALA | D | 354 | -23.001 | 45.362 | -51.169 | 1.00 | 62.32 | C |
| ATOM | 5801 | O   | ALA | D | 354 | -22.483 | 44.301 | -50.837 | 1.00 | 59.29 | O |
| ATOM | 5802 | CB  | ALA | D | 354 | -25.474 | 45.461 | -50.838 | 1.00 | 56.75 | C |
| ATOM | 5803 | N   | TRP | D | 355 | -22.417 | 46.561 | -50.994 | 1.00 | 55.45 | N |
| ATOM | 5804 | CA  | TRP | D | 355 | -21.305 | 46.766 | -50.073 | 1.00 | 52.77 | C |
| ATOM | 5805 | C   | TRP | D | 355 | -21.866 | 47.014 | -48.666 | 1.00 | 49.53 | C |
| ATOM | 5806 | O   | TRP | D | 355 | -23.024 | 47.434 | -48.516 | 1.00 | 41.59 | O |
| ATOM | 5807 | CB  | TRP | D | 355 | -20.409 | 47.936 | -50.481 | 1.00 | 49.32 | C |
| ATOM | 5808 | CG  | TRP | D | 355 | -19.717 | 47.851 | -51.801 | 1.00 | 45.15 | C |
| ATOM | 5809 | CD1 | TRP | D | 355 | -18.501 | 47.306 | -52.076 | 1.00 | 46.27 | C |
| ATOM | 5810 | CD2 | TRP | D | 355 | -20.168 | 48.450 | -53.026 | 1.00 | 50.01 | C |
| ATOM | 5811 | CE2 | TRP | D | 355 | -19.174 | 48.200 | -54.002 | 1.00 | 45.95 | C |
| ATOM | 5812 | CE3 | TRP | D | 355 | -21.319 | 49.169 | -53.388 | 1.00 | 47.19 | C |
| ATOM | 5813 | NE1 | TRP | D | 355 | -18.165 | 47.505 | -53.390 | 1.00 | 44.93 | N |
| ATOM | 5814 | CZ2 | TRP | D | 355 | -19.300 | 48.644 | -55.319 | 1.00 | 43.16 | C |

|      |      |     |     |   |     |         |        |         |      |       |     |
|------|------|-----|-----|---|-----|---------|--------|---------|------|-------|-----|
| ATOM | 5815 | CZ3 | TRP | D | 355 | -21.439 | 49.608 | -54.692 | 1.00 | 46.15 | C   |
| ATOM | 5816 | CH2 | TRP | D | 355 | -20.446 | 49.340 | -55.640 | 1.00 | 45.14 | C   |
| ATOM | 5817 | N   | ARG | D | 356 | -21.022 | 46.777 | -47.653 | 1.00 | 45.36 | N   |
| ATOM | 5818 | CA  | ARG | D | 356 | -21.384 | 47.019 | -46.253 | 1.00 | 50.05 | C   |
| ATOM | 5819 | C   | ARG | D | 356 | -20.458 | 48.090 | -45.641 | 1.00 | 49.26 | C   |
| ATOM | 5820 | O   | ARG | D | 356 | -19.217 | 47.921 | -45.539 | 1.00 | 42.53 | O   |
| ATOM | 5821 | CB  | ARG | D | 356 | -21.354 | 45.690 | -45.499 | 1.00 | 49.17 | C   |
| ATOM | 5822 | CG  | ARG | D | 356 | -22.275 | 44.633 | -46.098 | 1.00 | 52.75 | C   |
| ATOM | 5823 | CD  | ARG | D | 356 | -22.410 | 43.395 | -45.223 | 1.00 | 47.83 | C   |
| ATOM | 5824 | NE  | ARG | D | 356 | -21.179 | 42.612 | -45.171 | 1.00 | 42.53 | N   |
| ATOM | 5825 | CZ  | ARG | D | 356 | -20.821 | 41.827 | -44.157 | 1.00 | 38.39 | C   |
| ATOM | 5826 | NH1 | ARG | D | 356 | -21.594 | 41.747 | -43.088 | 1.00 | 33.75 | N1+ |
| ATOM | 5827 | NH2 | ARG | D | 356 | -19.702 | 41.115 | -44.234 | 1.00 | 38.20 | N   |
| ATOM | 5828 | N   | ALA | D | 357 | -21.063 | 49.225 | -45.275 | 1.00 | 52.19 | N   |
| ATOM | 5829 | CA  | ALA | D | 357 | -20.312 | 50.385 | -44.728 | 1.00 | 51.96 | C   |
| ATOM | 5830 | C   | ALA | D | 357 | -20.488 | 50.416 | -43.205 | 1.00 | 49.59 | C   |
| ATOM | 5831 | O   | ALA | D | 357 | -21.630 | 50.463 | -42.681 | 1.00 | 42.01 | O   |
| ATOM | 5832 | CB  | ALA | D | 357 | -20.746 | 51.676 | -45.377 | 1.00 | 50.84 | C   |
| ATOM | 5833 | N   | GLY | D | 358 | -19.337 | 50.331 | -42.514 | 1.00 | 49.13 | N   |
| ATOM | 5834 | CA  | GLY | D | 358 | -19.258 | 50.350 | -41.068 | 1.00 | 50.16 | C   |
| ATOM | 5835 | C   | GLY | D | 358 | -18.974 | 51.738 | -40.509 | 1.00 | 48.45 | C   |
| ATOM | 5836 | O   | GLY | D | 358 | -18.112 | 52.465 | -41.008 | 1.00 | 50.69 | O   |
| ATOM | 5837 | N   | ILE | D | 359 | -19.754 | 52.083 | -39.486 | 1.00 | 52.10 | N   |
| ATOM | 5838 | CA  | ILE | D | 359 | -19.538 | 53.204 | -38.595 | 1.00 | 60.76 | C   |
| ATOM | 5839 | C   | ILE | D | 359 | -19.284 | 52.612 | -37.197 | 1.00 | 58.67 | C   |
| ATOM | 5840 | O   | ILE | D | 359 | -20.215 | 52.510 | -36.353 | 1.00 | 52.18 | O   |
| ATOM | 5841 | CB  | ILE | D | 359 | -20.753 | 54.164 | -38.641 | 1.00 | 65.29 | C   |
| ATOM | 5842 | CG1 | ILE | D | 359 | -20.784 | 54.959 | -39.951 | 1.00 | 72.86 | C   |
| ATOM | 5843 | CG2 | ILE | D | 359 | -20.798 | 55.098 | -37.439 | 1.00 | 68.39 | C   |
| ATOM | 5844 | CD1 | ILE | D | 359 | -22.112 | 55.645 | -40.262 | 1.00 | 68.09 | C   |
| ATOM | 5845 | N   | MET | D | 360 | -18.039 | 52.167 | -36.964 | 1.00 | 50.81 | N   |
| ATOM | 5846 | CA  | MET | D | 360 | -17.718 | 51.460 | -35.720 | 1.00 | 51.71 | C   |
| ATOM | 5847 | C   | MET | D | 360 | -16.335 | 51.845 | -35.198 | 1.00 | 50.29 | C   |

|      |      |     |     |   |     |         |        |         |      |       |     |
|------|------|-----|-----|---|-----|---------|--------|---------|------|-------|-----|
| ATOM | 5848 | O   | MET | D | 360 | -15.399 | 52.177 | -35.991 | 1.00 | 40.25 | O   |
| ATOM | 5849 | CB  | MET | D | 360 | -17.746 | 49.942 | -35.921 | 1.00 | 54.67 | C   |
| ATOM | 5850 | CG  | MET | D | 360 | -19.118 | 49.346 | -35.857 | 1.00 | 49.46 | C   |
| ATOM | 5851 | SD  | MET | D | 360 | -19.073 | 47.693 | -36.522 | 1.00 | 55.96 | S   |
| ATOM | 5852 | CE  | MET | D | 360 | -20.797 | 47.259 | -36.263 | 1.00 | 55.13 | C   |
| ATOM | 5853 | N   | GLY | D | 361 | -16.218 | 51.767 | -33.858 | 1.00 | 48.44 | N   |
| ATOM | 5854 | CA  | GLY | D | 361 | -14.971 | 52.046 | -33.156 | 1.00 | 46.56 | C   |
| ATOM | 5855 | C   | GLY | D | 361 | -14.478 | 53.452 | -33.462 | 1.00 | 42.56 | C   |
| ATOM | 5856 | O   | GLY | D | 361 | -15.259 | 54.393 | -33.391 | 1.00 | 41.61 | O   |
| ATOM | 5857 | N   | GLU | D | 362 | -13.204 | 53.571 | -33.844 | 1.00 | 39.31 | N   |
| ATOM | 5858 | CA  | GLU | D | 362 | -12.549 | 54.852 | -34.007 | 1.00 | 42.45 | C   |
| ATOM | 5859 | C   | GLU | D | 362 | -12.879 | 55.467 | -35.371 | 1.00 | 44.46 | C   |
| ATOM | 5860 | O   | GLU | D | 362 | -12.465 | 56.604 | -35.629 | 1.00 | 47.32 | O   |
| ATOM | 5861 | CB  | GLU | D | 362 | -11.027 | 54.758 | -33.795 | 1.00 | 46.65 | C   |
| ATOM | 5862 | CG  | GLU | D | 362 | -10.610 | 54.568 | -32.330 | 1.00 | 48.14 | C   |
| ATOM | 5863 | CD  | GLU | D | 362 | -11.275 | 55.494 | -31.308 | 1.00 | 45.35 | C   |
| ATOM | 5864 | OE1 | GLU | D | 362 | -10.629 | 56.456 | -30.910 | 1.00 | 46.04 | O   |
| ATOM | 5865 | OE2 | GLU | D | 362 | -12.440 | 55.249 | -30.917 | 1.00 | 46.20 | O1- |
| ATOM | 5866 | N   | SER | D | 363 | -13.657 | 54.779 | -36.215 | 1.00 | 42.25 | N   |
| ATOM | 5867 | CA  | SER | D | 363 | -14.069 | 55.393 | -37.461 | 1.00 | 42.82 | C   |
| ATOM | 5868 | C   | SER | D | 363 | -15.490 | 55.976 | -37.373 | 1.00 | 46.87 | C   |
| ATOM | 5869 | O   | SER | D | 363 | -16.108 | 56.182 | -38.406 | 1.00 | 53.18 | O   |
| ATOM | 5870 | CB  | SER | D | 363 | -13.917 | 54.441 | -38.582 | 1.00 | 46.94 | C   |
| ATOM | 5871 | OG  | SER | D | 363 | -12.541 | 54.179 | -38.826 | 1.00 | 53.51 | O   |
| ATOM | 5872 | N   | SER | D | 364 | -15.955 | 56.315 | -36.156 | 1.00 | 45.76 | N   |
| ATOM | 5873 | CA  | SER | D | 364 | -17.263 | 56.966 | -35.905 | 1.00 | 47.04 | C   |
| ATOM | 5874 | C   | SER | D | 364 | -17.122 | 58.495 | -35.772 | 1.00 | 51.75 | C   |
| ATOM | 5875 | O   | SER | D | 364 | -17.472 | 59.091 | -34.733 | 1.00 | 54.55 | O   |
| ATOM | 5876 | CB  | SER | D | 364 | -17.910 | 56.384 | -34.688 | 1.00 | 45.71 | C   |
| ATOM | 5877 | OG  | SER | D | 364 | -17.876 | 54.965 | -34.744 | 1.00 | 48.76 | O   |
| ATOM | 5878 | N   | THR | D | 365 | -16.623 | 59.131 | -36.840 | 1.00 | 48.32 | N   |
| ATOM | 5879 | CA  | THR | D | 365 | -16.451 | 60.564 | -36.907 | 1.00 | 49.86 | C   |
| ATOM | 5880 | C   | THR | D | 365 | -16.966 | 61.045 | -38.265 | 1.00 | 52.58 | C   |



|      |      |     |     |   |     |         |        |         |      |       |     |
|------|------|-----|-----|---|-----|---------|--------|---------|------|-------|-----|
| ATOM | 5881 | O   | THR | D | 365 | -16.982 | 60.281 | -39.221 | 1.00 | 47.44 | O   |
| ATOM | 5882 | CB  | THR | D | 365 | -14.986 | 60.972 | -36.667 | 1.00 | 53.35 | C   |
| ATOM | 5883 | CG2 | THR | D | 365 | -14.475 | 60.430 | -35.353 | 1.00 | 53.66 | C   |
| ATOM | 5884 | OG1 | THR | D | 365 | -14.089 | 60.570 | -37.717 | 1.00 | 45.26 | O   |
| ATOM | 5885 | N   | LEU | D | 366 | -17.363 | 62.322 | -38.326 | 1.00 | 56.19 | N   |
| ATOM | 5886 | CA  | LEU | D | 366 | -17.804 | 62.952 | -39.568 | 1.00 | 55.25 | C   |
| ATOM | 5887 | C   | LEU | D | 366 | -16.651 | 62.913 | -40.586 | 1.00 | 49.28 | C   |
| ATOM | 5888 | O   | LEU | D | 366 | -16.865 | 62.609 | -41.747 | 1.00 | 50.38 | O   |
| ATOM | 5889 | CB  | LEU | D | 366 | -18.286 | 64.388 | -39.290 | 1.00 | 54.46 | C   |
| ATOM | 5890 | CG  | LEU | D | 366 | -19.579 | 64.534 | -38.477 | 1.00 | 54.07 | C   |
| ATOM | 5891 | CD1 | LEU | D | 366 | -19.913 | 65.996 | -38.235 | 1.00 | 52.09 | C   |
| ATOM | 5892 | CD2 | LEU | D | 366 | -20.757 | 63.856 | -39.158 | 1.00 | 54.17 | C   |
| ATOM | 5893 | N   | GLN | D | 367 | -15.425 | 63.173 | -40.125 | 1.00 | 47.02 | N   |
| ATOM | 5894 | CA  | GLN | D | 367 | -14.221 | 63.215 | -40.992 | 1.00 | 46.50 | C   |
| ATOM | 5895 | C   | GLN | D | 367 | -14.010 | 61.849 | -41.677 | 1.00 | 44.23 | C   |
| ATOM | 5896 | O   | GLN | D | 367 | -13.780 | 61.800 | -42.843 | 1.00 | 51.37 | O   |
| ATOM | 5897 | CB  | GLN | D | 367 | -12.981 | 63.667 | -40.203 | 1.00 | 44.17 | C   |
| ATOM | 5898 | CG  | GLN | D | 367 | -13.028 | 65.097 | -39.666 | 1.00 | 43.90 | C   |
| ATOM | 5899 | CD  | GLN | D | 367 | -13.508 | 65.259 | -38.232 | 1.00 | 49.20 | C   |
| ATOM | 5900 | NE2 | GLN | D | 367 | -13.270 | 66.442 | -37.680 | 1.00 | 49.84 | N   |
| ATOM | 5901 | OE1 | GLN | D | 367 | -14.129 | 64.380 | -37.621 | 1.00 | 46.18 | O   |
| ATOM | 5902 | N   | ARG | D | 368 | -14.076 | 60.746 | -40.927 | 1.00 | 46.19 | N   |
| ATOM | 5903 | CA  | ARG | D | 368 | -13.935 | 59.369 | -41.463 | 1.00 | 45.94 | C   |
| ATOM | 5904 | C   | ARG | D | 368 | -15.069 | 59.039 | -42.460 | 1.00 | 45.77 | C   |
| ATOM | 5905 | O   | ARG | D | 368 | -14.849 | 58.400 | -43.518 | 1.00 | 40.32 | O   |
| ATOM | 5906 | CB  | ARG | D | 368 | -13.960 | 58.337 | -40.325 | 1.00 | 43.07 | C   |
| ATOM | 5907 | CG  | ARG | D | 368 | -12.610 | 58.103 | -39.668 | 1.00 | 43.45 | C   |
| ATOM | 5908 | CD  | ARG | D | 368 | -11.661 | 57.215 | -40.456 | 1.00 | 45.13 | C   |
| ATOM | 5909 | NE  | ARG | D | 368 | -10.259 | 57.501 | -40.129 | 1.00 | 48.19 | N   |
| ATOM | 5910 | CZ  | ARG | D | 368 | -9.527  | 56.820 | -39.243 | 1.00 | 46.63 | C   |
| ATOM | 5911 | NH1 | ARG | D | 368 | -10.084 | 55.861 | -38.520 | 1.00 | 42.98 | N1+ |
| ATOM | 5912 | NH2 | ARG | D | 368 | -8.238  | 57.085 | -39.107 | 1.00 | 40.77 | N   |
| ATOM | 5913 | N   | VAL | D | 369 | -16.299 | 59.431 | -42.124 | 1.00 | 43.28 | N   |

|      |      |     |     |   |     |         |        |         |      |       |   |
|------|------|-----|-----|---|-----|---------|--------|---------|------|-------|---|
| ATOM | 5914 | CA  | VAL | D | 369 | -17.402 | 59.208 | -43.046 | 1.00 | 48.37 | C |
| ATOM | 5915 | C   | VAL | D | 369 | -17.149 | 59.957 | -44.368 | 1.00 | 53.33 | C |
| ATOM | 5916 | O   | VAL | D | 369 | -17.266 | 59.367 | -45.440 | 1.00 | 56.37 | O |
| ATOM | 5917 | CB  | VAL | D | 369 | -18.742 | 59.604 | -42.425 | 1.00 | 46.40 | C |
| ATOM | 5918 | CG1 | VAL | D | 369 | -19.783 | 59.825 | -43.510 | 1.00 | 48.97 | C |
| ATOM | 5919 | CG2 | VAL | D | 369 | -19.202 | 58.562 | -41.403 | 1.00 | 46.02 | C |
| ATOM | 5920 | N   | ASN | D | 370 | -16.791 | 61.247 | -44.270 | 1.00 | 56.12 | N |
| ATOM | 5921 | CA  | ASN | D | 370 | -16.502 | 62.111 | -45.424 | 1.00 | 54.72 | C |
| ATOM | 5922 | C   | ASN | D | 370 | -15.369 | 61.501 | -46.254 | 1.00 | 53.79 | C |
| ATOM | 5923 | O   | ASN | D | 370 | -15.402 | 61.554 | -47.485 | 1.00 | 60.02 | O |
| ATOM | 5924 | CB  | ASN | D | 370 | -16.130 | 63.547 | -45.019 | 1.00 | 51.92 | C |
| ATOM | 5925 | CG  | ASN | D | 370 | -17.315 | 64.367 | -44.534 | 1.00 | 51.47 | C |
| ATOM | 5926 | ND2 | ASN | D | 370 | -17.070 | 65.292 | -43.625 | 1.00 | 49.29 | N |
| ATOM | 5927 | OD1 | ASN | D | 370 | -18.450 | 64.168 | -44.957 | 1.00 | 46.93 | O |
| ATOM | 5928 | N   | PHE | D | 371 | -14.368 | 60.930 | -45.573 | 1.00 | 49.85 | N |
| ATOM | 5929 | CA  | PHE | D | 371 | -13.201 | 60.376 | -46.262 | 1.00 | 51.01 | C |
| ATOM | 5930 | C   | PHE | D | 371 | -13.536 | 59.058 | -46.992 | 1.00 | 52.78 | C |
| ATOM | 5931 | O   | PHE | D | 371 | -12.850 | 58.707 | -47.941 | 1.00 | 48.12 | O |
| ATOM | 5932 | CB  | PHE | D | 371 | -12.039 | 60.117 | -45.303 | 1.00 | 46.47 | C |
| ATOM | 5933 | CG  | PHE | D | 371 | -10.878 | 59.472 | -46.015 | 1.00 | 43.81 | C |
| ATOM | 5934 | CD1 | PHE | D | 371 | -10.137 | 60.194 | -46.931 | 1.00 | 43.65 | C |
| ATOM | 5935 | CD2 | PHE | D | 371 | -10.617 | 58.123 | -45.867 | 1.00 | 43.86 | C |
| ATOM | 5936 | CE1 | PHE | D | 371 | -9.095  | 59.604 | -47.623 | 1.00 | 44.40 | C |
| ATOM | 5937 | CE2 | PHE | D | 371 | -9.596  | 57.525 | -46.582 | 1.00 | 45.30 | C |
| ATOM | 5938 | CZ  | PHE | D | 371 | -8.824  | 58.270 | -47.443 | 1.00 | 45.83 | C |
| ATOM | 5939 | N   | TYR | D | 372 | -14.530 | 58.322 | -46.479 | 1.00 | 54.33 | N |
| ATOM | 5940 | CA  | TYR | D | 372 | -14.999 | 57.075 | -47.022 | 1.00 | 55.40 | C |
| ATOM | 5941 | C   | TYR | D | 372 | -15.701 | 57.338 | -48.346 | 1.00 | 59.90 | C |
| ATOM | 5942 | O   | TYR | D | 372 | -15.397 | 56.679 | -49.375 | 1.00 | 55.61 | O |
| ATOM | 5943 | CB  | TYR | D | 372 | -16.017 | 56.439 | -46.082 | 1.00 | 51.39 | C |
| ATOM | 5944 | CG  | TYR | D | 372 | -16.554 | 55.101 | -46.507 | 1.00 | 52.08 | C |
| ATOM | 5945 | CD1 | TYR | D | 372 | -15.876 | 53.934 | -46.202 | 1.00 | 55.04 | C |
| ATOM | 5946 | CD2 | TYR | D | 372 | -17.783 | 54.988 | -47.130 | 1.00 | 54.46 | C |

|      |      |     |     |   |     |         |        |         |      |       |   |
|------|------|-----|-----|---|-----|---------|--------|---------|------|-------|---|
| ATOM | 5947 | CE1 | TYR | D | 372 | -16.400 | 52.690 | -46.521 | 1.00 | 58.47 | C |
| ATOM | 5948 | CE2 | TYR | D | 372 | -18.315 | 53.754 | -47.472 | 1.00 | 54.51 | C |
| ATOM | 5949 | CZ  | TYR | D | 372 | -17.619 | 52.598 | -47.169 | 1.00 | 56.59 | C |
| ATOM | 5950 | OH  | TYR | D | 372 | -18.133 | 51.378 | -47.491 | 1.00 | 48.68 | O |
| ATOM | 5951 | N   | LEU | D | 373 | -16.644 | 58.291 | -48.295 | 1.00 | 54.56 | N |
| ATOM | 5952 | CA  | LEU | D | 373 | -17.437 | 58.674 | -49.472 | 1.00 | 52.88 | C |
| ATOM | 5953 | C   | LEU | D | 373 | -16.502 | 59.155 | -50.591 | 1.00 | 50.70 | C |
| ATOM | 5954 | O   | LEU | D | 373 | -16.554 | 58.676 | -51.723 | 1.00 | 46.82 | O |
| ATOM | 5955 | CB  | LEU | D | 373 | -18.428 | 59.759 | -49.062 | 1.00 | 49.21 | C |
| ATOM | 5956 | CG  | LEU | D | 373 | -19.573 | 59.291 | -48.166 | 1.00 | 48.36 | C |
| ATOM | 5957 | CD1 | LEU | D | 373 | -20.286 | 60.481 | -47.547 | 1.00 | 50.96 | C |
| ATOM | 5958 | CD2 | LEU | D | 373 | -20.558 | 58.439 | -48.944 | 1.00 | 47.09 | C |
| ATOM | 5959 | N   | TYR | D | 374 | -15.608 | 60.079 | -50.242 | 1.00 | 48.21 | N |
| ATOM | 5960 | CA  | TYR | D | 374 | -14.648 | 60.581 | -51.179 | 1.00 | 49.45 | C |
| ATOM | 5961 | C   | TYR | D | 374 | -13.956 | 59.399 | -51.893 | 1.00 | 52.10 | C |
| ATOM | 5962 | O   | TYR | D | 374 | -13.794 | 59.425 | -53.126 | 1.00 | 57.22 | O |
| ATOM | 5963 | CB  | TYR | D | 374 | -13.658 | 61.534 | -50.496 | 1.00 | 45.15 | C |
| ATOM | 5964 | CG  | TYR | D | 374 | -12.442 | 61.816 | -51.349 | 1.00 | 45.29 | C |
| ATOM | 5965 | CD1 | TYR | D | 374 | -12.470 | 62.788 | -52.336 | 1.00 | 47.67 | C |
| ATOM | 5966 | CD2 | TYR | D | 374 | -11.276 | 61.077 | -51.218 | 1.00 | 43.68 | C |
| ATOM | 5967 | CE1 | TYR | D | 374 | -11.364 | 63.048 | -53.130 | 1.00 | 46.21 | C |
| ATOM | 5968 | CE2 | TYR | D | 374 | -10.164 | 61.310 | -52.014 | 1.00 | 45.50 | C |
| ATOM | 5969 | CZ  | TYR | D | 374 | -10.209 | 62.297 | -52.986 | 1.00 | 48.91 | C |
| ATOM | 5970 | OH  | TYR | D | 374 | -9.133  | 62.539 | -53.797 | 1.00 | 48.68 | O |
| ATOM | 5971 | N   | ALA | D | 375 | -13.522 | 58.388 | -51.121 | 1.00 | 51.07 | N |
| ATOM | 5972 | CA  | ALA | D | 375 | -12.629 | 57.308 | -51.611 | 1.00 | 52.09 | C |
| ATOM | 5973 | C   | ALA | D | 375 | -13.446 | 56.261 | -52.374 | 1.00 | 46.44 | C |
| ATOM | 5974 | O   | ALA | D | 375 | -12.978 | 55.718 | -53.339 | 1.00 | 50.93 | O |
| ATOM | 5975 | CB  | ALA | D | 375 | -11.855 | 56.674 | -50.477 | 1.00 | 52.32 | C |
| ATOM | 5976 | N   | PHE | D | 376 | -14.670 | 56.010 | -51.922 | 1.00 | 47.26 | N |
| ATOM | 5977 | CA  | PHE | D | 376 | -15.671 | 55.265 | -52.691 | 1.00 | 55.80 | C |
| ATOM | 5978 | C   | PHE | D | 376 | -15.819 | 55.874 | -54.092 | 1.00 | 55.51 | C |
| ATOM | 5979 | O   | PHE | D | 376 | -15.573 | 55.192 | -55.091 | 1.00 | 56.27 | O |

|      |      |     |     |   |     |         |        |         |      |       |     |
|------|------|-----|-----|---|-----|---------|--------|---------|------|-------|-----|
| ATOM | 5980 | CB  | PHE | D | 376 | -17.002 | 55.259 | -51.938 | 1.00 | 58.83 | C   |
| ATOM | 5981 | CG  | PHE | D | 376 | -18.051 | 54.324 | -52.470 | 1.00 | 62.98 | C   |
| ATOM | 5982 | CD1 | PHE | D | 376 | -17.744 | 53.308 | -53.362 | 1.00 | 66.95 | C   |
| ATOM | 5983 | CD2 | PHE | D | 376 | -19.357 | 54.427 | -52.018 | 1.00 | 70.73 | C   |
| ATOM | 5984 | CE1 | PHE | D | 376 | -18.730 | 52.443 | -53.810 | 1.00 | 68.52 | C   |
| ATOM | 5985 | CE2 | PHE | D | 376 | -20.343 | 53.560 | -52.467 | 1.00 | 68.81 | C   |
| ATOM | 5986 | CZ  | PHE | D | 376 | -20.027 | 52.572 | -53.365 | 1.00 | 65.01 | C   |
| ATOM | 5987 | N   | LYS | D | 377 | -16.170 | 57.168 | -54.139 | 1.00 | 60.97 | N   |
| ATOM | 5988 | CA  | LYS | D | 377 | -16.377 | 57.931 | -55.390 | 1.00 | 64.93 | C   |
| ATOM | 5989 | C   | LYS | D | 377 | -15.163 | 57.769 | -56.304 | 1.00 | 59.87 | C   |
| ATOM | 5990 | O   | LYS | D | 377 | -15.294 | 57.361 | -57.435 | 1.00 | 62.29 | O   |
| ATOM | 5991 | CB  | LYS | D | 377 | -16.591 | 59.429 | -55.125 | 1.00 | 73.66 | C   |
| ATOM | 5992 | CG  | LYS | D | 377 | -16.932 | 60.260 | -56.360 | 1.00 | 76.92 | C   |
| ATOM | 5993 | CD  | LYS | D | 377 | -18.032 | 61.294 | -56.143 | 1.00 | 80.89 | C   |
| ATOM | 5994 | CE  | LYS | D | 377 | -18.206 | 62.247 | -57.313 | 1.00 | 80.02 | C   |
| ATOM | 5995 | NZ  | LYS | D | 377 | -18.922 | 63.484 | -56.907 | 1.00 | 78.07 | N1+ |
| ATOM | 5996 | N   | GLU | D | 378 | -13.977 | 58.098 | -55.782 | 1.00 | 57.20 | N   |
| ATOM | 5997 | CA  | GLU | D | 378 | -12.784 | 58.095 | -56.568 | 1.00 | 53.75 | C   |
| ATOM | 5998 | C   | GLU | D | 378 | -12.508 | 56.672 | -57.070 | 1.00 | 60.12 | C   |
| ATOM | 5999 | O   | GLU | D | 378 | -11.861 | 56.490 | -58.122 | 1.00 | 57.61 | O   |
| ATOM | 6000 | CB  | GLU | D | 378 | -11.622 | 58.655 | -55.751 | 1.00 | 51.89 | C   |
| ATOM | 6001 | CG  | GLU | D | 378 | -11.689 | 60.159 | -55.578 | 1.00 | 58.46 | C   |
| ATOM | 6002 | CD  | GLU | D | 378 | -11.749 | 60.959 | -56.875 | 1.00 | 57.53 | C   |
| ATOM | 6003 | OE1 | GLU | D | 378 | -10.794 | 60.855 | -57.693 | 1.00 | 50.38 | O   |
| ATOM | 6004 | OE2 | GLU | D | 378 | -12.771 | 61.662 | -57.072 | 1.00 | 52.04 | O1- |
| ATOM | 6005 | N   | SER | D | 379 | -12.975 | 55.676 | -56.305 | 1.00 | 59.67 | N   |
| ATOM | 6006 | CA  | SER | D | 379 | -12.687 | 54.272 | -56.576 | 1.00 | 62.49 | C   |
| ATOM | 6007 | C   | SER | D | 379 | -13.654 | 53.754 | -57.652 | 1.00 | 53.27 | C   |
| ATOM | 6008 | O   | SER | D | 379 | -13.225 | 53.113 | -58.584 | 1.00 | 51.61 | O   |
| ATOM | 6009 | CB  | SER | D | 379 | -12.703 | 53.435 | -55.292 | 1.00 | 61.10 | C   |
| ATOM | 6010 | OG  | SER | D | 379 | -11.502 | 53.608 | -54.540 | 1.00 | 47.43 | O   |
| ATOM | 6011 | N   | LEU | D | 380 | -14.941 | 54.062 | -57.522 | 1.00 | 51.11 | N   |
| ATOM | 6012 | CA  | LEU | D | 380 | -15.908 | 53.828 | -58.611 | 1.00 | 63.58 | C   |

|      |      |     |     |   |     |         |        |         |      |       |     |
|------|------|-----|-----|---|-----|---------|--------|---------|------|-------|-----|
| ATOM | 6013 | C   | LEU | D | 380 | -15.326 | 54.303 | -59.948 | 1.00 | 64.44 | C   |
| ATOM | 6014 | O   | LEU | D | 380 | -15.105 | 53.499 | -60.863 | 1.00 | 61.16 | O   |
| ATOM | 6015 | CB  | LEU | D | 380 | -17.198 | 54.603 | -58.321 | 1.00 | 64.69 | C   |
| ATOM | 6016 | CG  | LEU | D | 380 | -18.338 | 53.800 | -57.704 | 1.00 | 70.25 | C   |
| ATOM | 6017 | CD1 | LEU | D | 380 | -19.526 | 54.703 | -57.431 | 1.00 | 70.47 | C   |
| ATOM | 6018 | CD2 | LEU | D | 380 | -18.752 | 52.651 | -58.608 | 1.00 | 67.82 | C   |
| ATOM | 6019 | N   | LYS | D | 381 | -15.079 | 55.620 | -60.010 | 1.00 | 62.48 | N   |
| ATOM | 6020 | CA  | LYS | D | 381 | -14.754 | 56.380 | -61.217 | 1.00 | 62.63 | C   |
| ATOM | 6021 | C   | LYS | D | 381 | -13.530 | 55.790 | -61.910 | 1.00 | 60.41 | C   |
| ATOM | 6022 | O   | LYS | D | 381 | -13.563 | 55.576 | -63.104 | 1.00 | 76.32 | O   |
| ATOM | 6023 | CB  | LYS | D | 381 | -14.479 | 57.854 | -60.888 | 1.00 | 64.31 | C   |
| ATOM | 6024 | CG  | LYS | D | 381 | -15.698 | 58.668 | -60.476 | 1.00 | 66.05 | C   |
| ATOM | 6025 | CD  | LYS | D | 381 | -15.359 | 60.047 | -59.930 | 1.00 | 73.07 | C   |
| ATOM | 6026 | CE  | LYS | D | 381 | -14.440 | 60.862 | -60.819 | 1.00 | 73.58 | C   |
| ATOM | 6027 | NZ  | LYS | D | 381 | -14.415 | 62.279 | -60.386 | 1.00 | 75.24 | N1+ |
| ATOM | 6028 | N   | ALA | D | 382 | -12.464 | 55.546 | -61.148 | 1.00 | 58.70 | N   |
| ATOM | 6029 | CA  | ALA | D | 382 | -11.183 | 55.072 | -61.697 | 1.00 | 71.66 | C   |
| ATOM | 6030 | C   | ALA | D | 382 | -11.308 | 53.674 | -62.325 | 1.00 | 77.08 | C   |
| ATOM | 6031 | O   | ALA | D | 382 | -10.487 | 53.343 | -63.204 | 1.00 | 69.04 | O   |
| ATOM | 6032 | CB  | ALA | D | 382 | -10.115 | 55.063 | -60.629 | 1.00 | 75.66 | C   |
| ATOM | 6033 | N   | THR | D | 383 | -12.273 | 52.862 | -61.845 | 1.00 | 71.29 | N   |
| ATOM | 6034 | CA  | THR | D | 383 | -12.440 | 51.478 | -62.279 | 1.00 | 65.97 | C   |
| ATOM | 6035 | C   | THR | D | 383 | -13.668 | 51.336 | -63.180 | 1.00 | 75.77 | C   |
| ATOM | 6036 | O   | THR | D | 383 | -13.872 | 50.267 | -63.732 | 1.00 | 78.41 | O   |
| ATOM | 6037 | CB  | THR | D | 383 | -12.533 | 50.494 | -61.100 | 1.00 | 63.41 | C   |
| ATOM | 6038 | CG2 | THR | D | 383 | -11.184 | 50.252 | -60.454 | 1.00 | 60.55 | C   |
| ATOM | 6039 | OG1 | THR | D | 383 | -13.469 | 50.937 | -60.115 | 1.00 | 51.42 | O   |
| ATOM | 6040 | N   | HIS | D | 384 | -14.470 | 52.404 | -63.323 | 1.00 | 84.46 | N   |
| ATOM | 6041 | CA  | HIS | D | 384 | -15.700 | 52.395 | -64.151 | 1.00 | 82.52 | C   |
| ATOM | 6042 | C   | HIS | D | 384 | -15.962 | 53.774 | -64.762 | 1.00 | 87.38 | C   |
| ATOM | 6043 | O   | HIS | D | 384 | -16.749 | 54.545 | -64.212 | 1.00 | 83.24 | O   |
| ATOM | 6044 | CB  | HIS | D | 384 | -16.904 | 51.940 | -63.309 | 1.00 | 76.04 | C   |
| ATOM | 6045 | CG  | HIS | D | 384 | -16.743 | 50.594 | -62.681 | 1.00 | 76.66 | C   |

|        |      |     |     |   |     |         |        |         |      |       |     |
|--------|------|-----|-----|---|-----|---------|--------|---------|------|-------|-----|
| ATOM   | 6046 | CD2 | HIS | D | 384 | -17.263 | 49.389 | -62.999 | 1.00 | 78.73 | C   |
| ATOM   | 6047 | ND1 | HIS | D | 384 | -15.969 | 50.392 | -61.558 | 1.00 | 74.31 | N   |
| ATOM   | 6048 | CE1 | HIS | D | 384 | -16.018 | 49.123 | -61.215 | 1.00 | 71.10 | C   |
| ATOM   | 6049 | NE2 | HIS | D | 384 | -16.802 | 48.486 | -62.080 | 1.00 | 73.04 | N   |
| ATOM   | 6050 | N   | PRO | D | 385 | -15.320 | 54.140 | -65.902 | 1.00 | 94.34 | N   |
| ATOM   | 6051 | CA  | PRO | D | 385 | -15.643 | 55.386 | -66.614 | 1.00 | 92.03 | C   |
| ATOM   | 6052 | C   | PRO | D | 385 | -17.141 | 55.577 | -66.941 | 1.00 | 92.74 | C   |
| ATOM   | 6053 | O   | PRO | D | 385 | -17.578 | 55.159 | -68.008 | 1.00 | 74.06 | O   |
| ATOM   | 6054 | CB  | PRO | D | 385 | -14.826 | 55.256 | -67.911 | 1.00 | 89.84 | C   |
| ATOM   | 6055 | CG  | PRO | D | 385 | -13.642 | 54.390 | -67.523 | 1.00 | 94.27 | C   |
| ATOM   | 6056 | CD  | PRO | D | 385 | -14.207 | 53.401 | -66.526 | 1.00 | 95.68 | C   |
| ATOM   | 6057 | N   | ASP | D | 386 | -17.904 | 56.206 | -66.021 | 1.00 | 97.82 | N   |
| ATOM   | 6058 | CA  | ASP | D | 386 | -19.390 | 56.325 | -66.100 | 1.00 | 91.71 | C   |
| ATOM   | 6059 | C   | ASP | D | 386 | -19.919 | 57.242 | -64.982 | 1.00 | 85.56 | C   |
| ATOM   | 6060 | O   | ASP | D | 386 | -19.177 | 58.010 | -64.361 | 1.00 | 83.97 | O   |
| ATOM   | 6061 | CB  | ASP | D | 386 | -20.079 | 54.955 | -66.001 | 1.00 | 93.24 | C   |
| ATOM   | 6062 | CG  | ASP | D | 386 | -19.733 | 53.942 | -67.092 | 1.00 | 93.28 | C   |
| ATOM   | 6063 | OD1 | ASP | D | 386 | -20.167 | 54.131 | -68.248 | 1.00 | 84.85 | O   |
| ATOM   | 6064 | OD2 | ASP | D | 386 | -19.036 | 52.948 | -66.776 | 1.00 | 94.39 | O1- |
| TER    | 6065 |     | ASP | D | 386 |         |        |         |      |       |     |
| HETATM | 6066 | P   | PLP | D | 401 | -17.794 | 36.932 | -34.600 | 1.00 | 54.82 | P   |
| HETATM | 6067 | O1P | PLP | D | 401 | -18.037 | 35.509 | -34.172 | 1.00 | 47.24 | O   |
| HETATM | 6068 | O2P | PLP | D | 401 | -17.068 | 37.705 | -33.535 | 1.00 | 58.27 | O1- |
| HETATM | 6069 | O3P | PLP | D | 401 | -17.179 | 37.125 | -35.998 | 1.00 | 46.01 | O   |
| HETATM | 6070 | O4P | PLP | D | 401 | -19.224 | 37.681 | -34.554 | 1.00 | 49.11 | O   |
| HETAT  | 6071 | N1  | PLP | D | 401 | -23.811 | 38.696 | -34.781 | 1.00 | 46.22 | N   |
| HETATM | 6072 | C2  | PLP | D | 401 | -23.738 | 39.901 | -35.408 | 1.00 | 50.02 | C   |
| HETATM | 6073 | C2A | PLP | D | 401 | -24.946 | 40.820 | -35.456 | 1.00 | 53.20 | C   |
| HETATM | 6074 | C3  | PLP | D | 401 | -22.473 | 40.338 | -36.048 | 1.00 | 48.15 | C   |
| HETATM | 6075 | O3  | PLP | D | 401 | -22.403 | 41.548 | -36.676 | 1.00 | 48.26 | O   |
| HETATM | 6076 | C4  | PLP | D | 401 | -21.297 | 39.438 | -36.015 | 1.00 | 50.52 | C   |
| HETATM | 6077 | C4A | PLP | D | 401 | -20.012 | 39.886 | -36.656 | 1.00 | 55.99 | C   |
| HETATM | 6078 | C5  | PLP | D | 401 | -21.503 | 38.135 | -35.293 | 1.00 | 50.43 | C   |

|         |      |      |      |   |     |         |        |         |      |       |   |
|---------|------|------|------|---|-----|---------|--------|---------|------|-------|---|
| HETATM  | 6079 | C5A  | PLP  | D | 401 | -20.388 | 37.094 | -35.156 | 1.00 | 49.61 | C |
| HETATM  | 6080 | C6   | PLP  | D | 401 | -22.758 | 37.852 | -34.720 | 1.00 | 49.14 | C |
| END     |      |      |      |   |     |         |        |         |      |       |   |
| CONNECT | 1575 | 3033 |      |   |     |         |        |         |      |       |   |
| CONNECT | 3022 | 3023 | 3024 |   |     |         |        |         |      |       |   |
| CONNECT | 3022 | 3025 |      |   |     |         |        |         |      |       |   |
| CONNECT | 3022 | 3025 |      |   |     |         |        |         |      |       |   |
| CONNECT | 3022 | 3026 |      |   |     |         |        |         |      |       |   |
| CONNECT | 3023 | 3022 |      |   |     |         |        |         |      |       |   |
| CONNECT | 3024 | 3022 |      |   |     |         |        |         |      |       |   |
| CONNECT | 3025 | 3022 |      |   |     |         |        |         |      |       |   |
| CONNECT | 3025 | 3022 |      |   |     |         |        |         |      |       |   |
| CONNECT | 3026 | 3022 | 3035 |   |     |         |        |         |      |       |   |
| CONNECT | 3027 | 3028 |      |   |     |         |        |         |      |       |   |
| CONNECT | 3027 | 3028 |      |   |     |         |        |         |      |       |   |
| CONNECT | 3027 | 3028 |      |   |     |         |        |         |      |       |   |
| CONNECT | 3027 | 3028 |      |   |     |         |        |         |      |       |   |
| CONNECT | 3027 | 3036 |      |   |     |         |        |         |      |       |   |
| CONNECT | 3027 | 3036 |      |   |     |         |        |         |      |       |   |
| CONNECT | 3027 | 3036 |      |   |     |         |        |         |      |       |   |
| CONNECT | 3027 | 3036 |      |   |     |         |        |         |      |       |   |
| CONNECT | 3027 | 3036 |      |   |     |         |        |         |      |       |   |
| CONNECT | 3028 | 3027 |      |   |     |         |        |         |      |       |   |
| CONNECT | 3028 | 3027 |      |   |     |         |        |         |      |       |   |
| CONNECT | 3028 | 3027 |      |   |     |         |        |         |      |       |   |
| CONNECT | 3028 | 3027 |      |   |     |         |        |         |      |       |   |
| CONNECT | 3028 | 3029 |      |   |     |         |        |         |      |       |   |
| CONNECT | 3028 | 3030 |      |   |     |         |        |         |      |       |   |
| CONNECT | 3028 | 3030 |      |   |     |         |        |         |      |       |   |
| CONNECT | 3028 | 3030 |      |   |     |         |        |         |      |       |   |
| CONNECT | 3028 | 3030 |      |   |     |         |        |         |      |       |   |
| CONNECT | 3029 | 3028 |      |   |     |         |        |         |      |       |   |
| CONNECT | 3030 | 3028 |      |   |     |         |        |         |      |       |   |
| CONNECT | 3030 | 3028 |      |   |     |         |        |         |      |       |   |

CONNECT 3030 3028  
CONNECT 3030 3028  
CONNECT 3030 3031  
CONNECT 3030 3032  
CONNECT 3030 3032  
CONNECT 3030 3032  
CONNECT 3030 3032  
CONNECT 3031 3030  
CONNECT 3032 3033  
CONNECT 3032 3034  
CONNECT 3032 3034  
CONNECT 3032 3034  
CONNECT 3032 3034  
CONNECT 3033 1575 3032  
CONNECT 3034 3035  
CONNECT 3034 3036  
CONNECT 3034 3036  
CONNECT 3034 3036  
CONNECT 3034 3036  
CONNECT 3035 3026 3034  
CONNECT 3036 3027  
CONNECT 3036 3034



CONNECT 3036 3034  
CONNECT 3036 3034  
CONNECT 3036 3034  
CONNECT 4611 6077  
CONNECT 6066 6067 6068  
CONNECT 6066 6069  
CONNECT 6066 6069  
CONNECT 6066 6070  
CONNECT 6067 6066  
CONNECT 6068 6066  
CONNECT 6069 6066  
CONNECT 6069 6066  
CONNECT 6070 6066 6079  
CONNECT 6071 6072  
CONNECT 6071 6072  
CONNECT 6071 6072  
CONNECT 6071 6072  
CONNECT 6071 6080  
CONNECT 6071 6080  
CONNECT 6071 6080  
CONNECT 6071 6080  
CONNECT 6072 6071  
CONNECT 6072 6071  
CONNECT 6072 6071  
CONNECT 6072 6071  
CONNECT 6072 6073  
CONNECT 6072 6074  
CONNECT 6072 6074  
CONNECT 6072 6074  
CONNECT 6072 6074  
CONNECT 6073 6072  
CONNECT 6074 6072  
CONNECT 6074 6072

CONNECT 6074 6072  
CONNECT 6074 6072  
CONNECT 6074 6075  
CONNECT 6074 6076  
CONNECT 6074 6076  
CONNECT 6074 6076  
CONNECT 6075 6074  
CONNECT 6076 6077  
CONNECT 6076 6078  
CONNECT 6076 6078  
CONNECT 6076 6078  
CONNECT 6076 6078  
CONNECT 6077 4611 6076  
CONNECT 6078 6079  
CONNECT 6078 6080  
CONNECT 6078 6080  
CONNECT 6078 6080  
CONNECT 6078 6080  
CONNECT 6079 6070 6078  
CONNECT 6080 6071  
CONNECT 6080 6071  
CONNECT 6080 6071  
CONNECT 6080 6071  
CONNECT 6080 6078

CONNECT 6080 6078  
CONNECT 6080 6078  
CONNECT 6080 6078  
END



QSAR

“Leave-N-Out” Cross Validation

|          |          |          |          |          |          |          |          |          |          |          |
|----------|----------|----------|----------|----------|----------|----------|----------|----------|----------|----------|
| 0,608273 | 0,608273 | 0,608273 | 0,608273 | 0,608273 | 0,608273 | 0,608273 | 0,608273 | 0,608273 | 0,608273 | 0,608273 |
| 0,581904 | 0,616446 | 0,597623 | 0,61217  | 0,630716 | 0,629799 | 0,607343 | 0,602562 | 0,580299 | 0,607537 | 0,60664  |
| 0,607811 | 0,552917 | 0,556211 | 0,631025 | 0,620883 | 0,617015 | 0,603128 | 0,570232 | 0,634198 | 0,610809 | 0,600423 |
| 0,484199 | 0,536605 | 0,605827 | 0,548813 | 0,557491 | 0,558146 | 0,60994  | 0,626824 | 0,587406 | 0,62675  | 0,5742   |
| 0,437665 | 0,538183 | 0,438924 | 0,574526 | 0,60754  | 0,568051 | 0,511475 | 0,665014 | 0,599328 | 0,646778 | 0,558748 |
| 0,594698 | 0,573302 | 0,48796  | 0,616658 | 0,518724 | 0,616694 | 0,514392 | 0,507362 | 0,650272 | 0,60679  | 0,568685 |
| 0,551093 | 0,623575 | 0,572385 | 0,565126 | 0,341361 | 0,559457 | 0,53023  | 0,549799 | 0,661785 | 0,539292 | 0,54941  |
| 0,257754 | 0,432299 | 0,545004 | 0,606888 | 0,453611 | 0,554256 | 0,567427 | 0,521926 | 0,58613  | 0,518621 | 0,504392 |

- 1 0,608273
- 2 0,60664
- 3 0,600423
- 4 0,5742
- 5 0,558748
- 6 0,568685
- 7 0,54941
- 8 0,504392

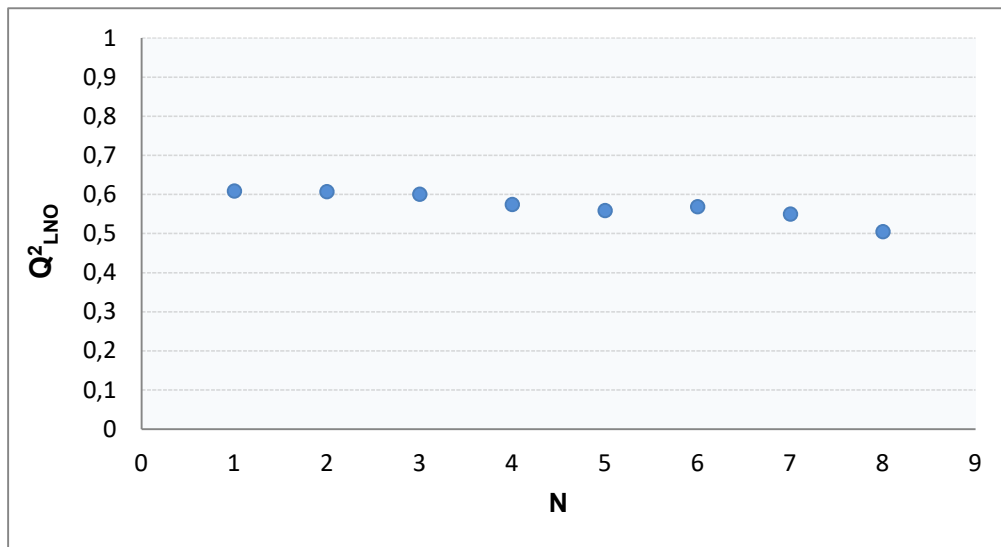

QSAR  
Descriptors from Dragon

| No. | NAME          | MW     | AMW      | Sv      | Mv       | Me       | Mp       | Mi       | nTA | nBM | SCBO | RBN  |   |
|-----|---------------|--------|----------|---------|----------|----------|----------|----------|-----|-----|------|------|---|
| 1   | 4a_docked.pdb | 217,22 | 8,6888   | 17,031  | 0,68124  | 1,031124 | 0,681592 | 1,12312  |     | 2   | 13   | 24,5 | 4 |
| 2   | 4e_docked.pdb | 231,25 | 8,258929 | 18,5578 | 0,662779 | 1,023632 | 0,671471 | 1,124757 |     | 3   | 13   | 25,5 | 4 |
| 3   | 4d_docked.pdb | 296,11 | 11,8444  | 18,0562 | 0,722248 | 1,040288 | 0,735684 | 1,116784 |     | 3   | 13   | 25,5 | 4 |
| 4   | 4b_docked.pdb | 247,25 | 8,525862 | 19,2726 | 0,664572 | 1,034103 | 0,66399  | 1,127676 |     | 3   | 13   | 26,5 | 5 |
| 5   | 4j_docked.pdb | 251,66 | 10,0664  | 17,8585 | 0,71434  | 1,044072 | 0,715908 | 1,12088  |     | 3   | 13   | 25,5 | 4 |
| 6   | 4l_docked.pdb | 247,25 | 8,525862 | 19,2726 | 0,664572 | 1,034103 | 0,66399  | 1,127676 |     | 3   | 13   | 26,5 | 5 |
| 7   | 4g_docked.pdb | 235,21 | 9,4084   | 17,4143 | 0,696572 | 1,051632 | 0,679092 | 1,136708 |     | 3   | 13   | 25,5 | 4 |
| 8   | 4m_docked.pdb | 231,25 | 8,258929 | 18,5578 | 0,662779 | 1,023632 | 0,671471 | 1,124757 |     | 3   | 13   | 25,5 | 4 |
| 9   | 4k_docked.pdb | 261,23 | 9,329643 | 19,4606 | 0,695021 | 1,051168 | 0,676743 | 1,124886 |     | 2   | 13   | 28,5 | 4 |
| 10  | 4i_docked.pdb | 262,22 | 9,711852 | 18,9552 | 0,702044 | 1,061144 | 0,673819 | 1,132589 |     | 4   | 15   | 29,5 | 5 |
| 11  | 4p_docked.pdb | 262,22 | 9,711852 | 18,9552 | 0,702044 | 1,061144 | 0,673819 | 1,132589 |     | 4   | 15   | 29,5 | 5 |
| 12  | 4h_docked.pdb | 285,22 | 10,18643 | 19,7077 | 0,703846 | 1,078564 | 0,664775 | 1,161154 |     | 5   | 13   | 28,5 | 4 |
| 13  | 4c_docked.pdb | 286,1  | 11,444   | 18,686  | 0,74744  | 1,05702  | 0,750224 | 1,11864  |     | 4   | 13   | 26,5 | 4 |
| 14  | 4n_docked.pdb | 207,18 | 9,417273 | 15,219  | 0,691773 | 1,055536 | 0,669677 | 1,130555 |     | 2   | 12   | 23   | 4 |
| 15  | 4o_docked.pdb | 223,25 | 10,14773 | 15,6913 | 0,713241 | 1,044132 | 0,723914 | 1,1174   |     | 2   | 12   | 23   | 4 |
| 16  | 4f_docked.pdb | 231,25 | 8,258929 | 18,5578 | 0,662779 | 1,023632 | 0,671471 | 1,124757 |     | 3   | 13   | 25,5 | 4 |
| 17  | 4q_docked.pdb | 235,21 | 9,4084   | 17,4143 | 0,696572 | 1,051632 | 0,679092 | 1,136708 |     | 3   | 13   | 25,5 | 4 |
| 18  | 4r_docked.pdb | 296,11 | 11,8444  | 18,0562 | 0,722248 | 1,040288 | 0,735684 | 1,116784 |     | 3   | 13   | 25,5 | 4 |
| 19  | 4s_docked.pdb | 251,66 | 10,0664  | 17,8585 | 0,71434  | 1,044072 | 0,715908 | 1,12088  |     | 3   | 13   | 25,5 | 4 |
| 20  | 6a_docked.pdb | 231,25 | 8,258929 | 18,5578 | 0,662779 | 1,023632 | 0,671471 | 1,124757 |     | 2   | 13   | 25,5 | 5 |
| 21  | 6b_docked.pdb | 261,28 | 8,165    | 20,7994 | 0,649981 | 1,027269 | 0,656784 | 1,128681 |     | 3   | 13   | 27,5 | 6 |
| 22  | 6c_docked.pdb | 300,13 | 10,71893 | 20,2128 | 0,721886 | 1,046754 | 0,73275  | 1,120757 |     | 4   | 13   | 27,5 | 5 |
| 23  | 6d_docked.pdb | 310,14 | 11,07643 | 19,583  | 0,699393 | 1,031814 | 0,719768 | 1,1191   |     | 3   | 13   | 26,5 | 5 |
| 24  | 6e_docked.pdb | 245,28 | 7,912258 | 20,0846 | 0,64789  | 1,01759  | 0,66331  | 1,126077 |     | 3   | 13   | 26,5 | 5 |
| 25  | 6f_docked.pdb | 245,28 | 7,912258 | 20,0846 | 0,64789  | 1,01759  | 0,66331  | 1,126077 |     | 3   | 13   | 26,5 | 5 |
| 26  | 6g_docked.pdb | 281,31 | 8,273824 | 23,0846 | 0,678959 | 1,016038 | 0,693018 | 1,114953 |     | 2   | 18   | 33   | 5 |
| 27  | 6h_docked.pdb | 299,25 | 9,653226 | 21,2345 | 0,684984 | 1,067206 | 0,657261 | 1,158952 |     | 5   | 13   | 29,5 | 5 |
| 28  | 6i_docked.pdb | 357,14 | 12,755   | 19,8746 | 0,709807 | 1,0261   | 0,766439 | 1,114779 |     | 3   | 13   | 26,5 | 5 |
| 29  | 6j_docked.pdb | 265,69 | 9,488929 | 19,3853 | 0,692332 | 1,035193 | 0,702111 | 1,122757 |     | 3   | 13   | 26,5 | 5 |
| 30  | 6k_docked.pdb | 275,26 | 8,879355 | 20,9874 | 0,677013 | 1,042461 | 0,668071 | 1,126194 |     | 2   | 13   | 29,5 | 5 |



| RBF      | nDB | nAB | nH | nO | nF | nCL | nBR | nHM | nHet | nX | C% | N%       | O%       | nCsp3    |   |
|----------|-----|-----|----|----|----|-----|-----|-----|------|----|----|----------|----------|----------|---|
| 0,153846 | 2   | 11  | 11 | 9  | 3  | 0   | 0   | 0   | 0    | 5  | 0  | 44       | 8        | 12       | 2 |
| 0,137931 | 2   | 11  | 11 | 11 | 3  | 0   | 0   | 0   | 0    | 5  | 0  | 42,85714 | 7,142857 | 10,71429 | 3 |
| 0,153846 | 2   | 11  | 11 | 8  | 3  | 0   | 0   | 1   | 1    | 6  | 1  | 44       | 8        | 12       | 2 |
| 0,166667 | 2   | 11  | 11 | 11 | 4  | 0   | 0   | 0   | 0    | 6  | 0  | 41,37931 | 6,896552 | 13,7931  | 3 |
| 0,153846 | 2   | 11  | 11 | 8  | 3  | 0   | 1   | 0   | 1    | 6  | 1  | 44       | 8        | 12       | 2 |
| 0,166667 | 2   | 11  | 11 | 11 | 4  | 0   | 0   | 0   | 0    | 6  | 0  | 41,37931 | 6,896552 | 13,7931  | 3 |
| 0,153846 | 2   | 11  | 11 | 8  | 3  | 1   | 0   | 0   | 0    | 6  | 1  | 44       | 8        | 12       | 2 |
| 0,137931 | 2   | 11  | 11 | 11 | 3  | 0   | 0   | 0   | 0    | 5  | 0  | 42,85714 | 7,142857 | 10,71429 | 3 |
| 0,133333 | 2   | 11  | 11 | 9  | 5  | 0   | 0   | 0   | 0    | 7  | 0  | 42,85714 | 7,142857 | 17,85714 | 3 |
| 0,178571 | 4   | 11  | 11 | 8  | 5  | 0   | 0   | 0   | 0    | 8  | 0  | 40,74074 | 11,11111 | 18,51852 | 2 |
| 0,178571 | 4   | 11  | 11 | 8  | 5  | 0   | 0   | 0   | 0    | 8  | 0  | 40,74074 | 11,11111 | 18,51852 | 2 |
| 0,137931 | 2   | 11  | 11 | 8  | 3  | 3   | 0   | 0   | 0    | 8  | 3  | 42,85714 | 7,142857 | 10,71429 | 3 |
| 0,153846 | 2   | 11  | 11 | 7  | 3  | 0   | 2   | 0   | 2    | 7  | 2  | 44       | 8        | 12       | 2 |
| 0,173913 | 2   | 10  | 10 | 7  | 4  | 0   | 0   | 0   | 0    | 6  | 0  | 40,90909 | 9,090909 | 18,18182 | 2 |
| 0,173913 | 2   | 10  | 10 | 7  | 3  | 0   | 0   | 0   | 1    | 6  | 0  | 40,90909 | 9,090909 | 13,63636 | 2 |
| 0,137931 | 2   | 11  | 11 | 11 | 3  | 0   | 0   | 0   | 0    | 5  | 0  | 42,85714 | 7,142857 | 10,71429 | 3 |
| 0,153846 | 2   | 11  | 11 | 8  | 3  | 1   | 0   | 0   | 0    | 6  | 1  | 44       | 8        | 12       | 2 |
| 0,153846 | 2   | 11  | 11 | 8  | 3  | 0   | 0   | 1   | 1    | 6  | 1  | 44       | 8        | 12       | 2 |
| 0,153846 | 2   | 11  | 11 | 8  | 3  | 0   | 1   | 0   | 1    | 6  | 1  | 44       | 8        | 12       | 2 |
| 0,172414 | 2   | 11  | 11 | 11 | 3  | 0   | 0   | 0   | 0    | 5  | 0  | 42,85714 | 7,142857 | 10,71429 | 3 |
| 0,181818 | 2   | 11  | 11 | 13 | 4  | 0   | 0   | 0   | 0    | 6  | 0  | 40,625   | 6,25     | 12,5     | 4 |
| 0,172414 | 2   | 11  | 11 | 9  | 3  | 0   | 2   | 0   | 2    | 7  | 2  | 42,85714 | 7,142857 | 10,71429 | 3 |
| 0,172414 | 2   | 11  | 11 | 10 | 3  | 0   | 0   | 1   | 1    | 6  | 1  | 42,85714 | 7,142857 | 10,71429 | 3 |
| 0,15625  | 2   | 11  | 11 | 13 | 3  | 0   | 0   | 0   | 0    | 5  | 0  | 41,93548 | 6,451613 | 9,677419 | 4 |
| 0,15625  | 2   | 11  | 11 | 13 | 3  | 0   | 0   | 0   | 0    | 5  | 0  | 41,93548 | 6,451613 | 9,677419 | 4 |
| 0,138889 | 2   | 16  | 16 | 13 | 3  | 0   | 0   | 0   | 0    | 5  | 0  | 47,05882 | 5,882353 | 8,823529 | 3 |
| 0,15625  | 2   | 11  | 11 | 10 | 3  | 3   | 0   | 0   | 0    | 8  | 3  | 41,93548 | 6,451613 | 9,677419 | 4 |
| 0,172414 | 2   | 11  | 11 | 10 | 3  | 0   | 0   | 0   | 1    | 6  | 1  | 42,85714 | 7,142857 | 10,71429 | 3 |
| 0,172414 | 2   | 11  | 11 | 10 | 3  | 0   | 1   | 0   | 1    | 6  | 1  | 42,85714 | 7,142857 | 10,71429 | 3 |
| 0,151515 | 2   | 11  | 11 | 11 | 5  | 0   | 0   | 0   | 0    | 7  | 0  | 41,93548 | 6,451613 | 16,12903 | 4 |

| nCIC | MCD      | nR05 | nR06 | nR09 | ARR | ZM1Kup   | Qindex   | DBI | Ram      | BLI | PJI2     | ICR      | S2K      | S3K      |          |
|------|----------|------|------|------|-----|----------|----------|-----|----------|-----|----------|----------|----------|----------|----------|
| 2    | 0,6875   | 1    | 1    | 1    | 0   | 0,647059 | 317,4968 | 10  | 2,54951  | 4   | 0,852981 | 1        | 2,483459 | 4,68873  | 2,756226 |
| 2    | 0,647059 | 1    | 1    | 1    | 0   | 0,611111 | 325,4968 | 11  | 2,645751 | 5   | 0,87404  | 0,833333 | 2,571319 | 4,896962 | 2,988493 |
| 2    | 0,647059 | 1    | 1    | 1    | 0   | 0,611111 | 344,1513 | 11  | 2,645751 | 5   | 0,95437  | 0,833333 | 2,571319 | 5,215654 | 3,223022 |
| 2    | 0,611111 | 1    | 1    | 1    | 0   | 0,578947 | 373,2324 | 11  | 2,828427 | 5   | 0,845781 | 1        | 2,710777 | 5,539971 | 3,237486 |
| 2    | 0,647059 | 1    | 1    | 1    | 0   | 0,611111 | 351,7002 | 11  | 2,645751 | 5   | 0,885198 | 0,833333 | 2,571319 | 5,085761 | 3,127134 |
| 2    | 0,611111 | 1    | 1    | 1    | 0   | 0,578947 | 373,2324 | 11  | 2,828427 | 5   | 0,845781 | 0,833333 | 2,584963 | 5,539971 | 3,237486 |
| 2    | 0,647059 | 1    | 1    | 1    | 0   | 0,611111 | 411,6079 | 11  | 2,645751 | 5   | 0,822204 | 0,833333 | 2,571319 | 4,854343 | 2,957319 |
| 2    | 0,647059 | 1    | 1    | 1    | 0   | 0,611111 | 325,4968 | 11  | 2,645751 | 5   | 0,875037 | 1        | 2,469241 | 4,896962 | 2,771325 |
| 3    | 0,736842 | 2    | 1    | 1    | 1   | 0,52381  | 430,9679 | 15  | 2,738613 | 6   | 0,806644 | 0,833333 | 2,575589 | 4,899277 | 2,535413 |
| 2    | 0,578947 | 1    | 1    | 1    | 0   | 0,55     | 448,613  | 12  | 3,162278 | 6   | 0,799949 | 1        | 2,694781 | 5,484649 | 3,28584  |
| 2    | 0,578947 | 1    | 1    | 1    | 0   | 0,55     | 448,613  | 12  | 3,162278 | 6   | 0,799949 | 0,833333 | 2,575589 | 5,484649 | 3,28584  |
| 2    | 0,55     | 1    | 1    | 1    | 0   | 0,52381  | 601,8302 | 14  | 3,605551 | 7   | 0,794455 | 1        | 2,665957 | 5,437943 | 3,662329 |
| 2    | 0,611111 | 1    | 1    | 1    | 0   | 0,578947 | 385,9036 | 12  | 2,738613 | 6   | 0,914969 | 0,833333 | 2,584963 | 5,484649 | 3,301361 |
| 2    | 0,666667 | 2    | 0    | 0    | 0   | 0,625    | 347,2324 | 10  | 2,54951  | 4   | 0,809633 | 0,8      | 2,289246 | 4,173326 | 2,373515 |
| 2    | 0,666667 | 2    | 0    | 0    | 0   | 0,625    | 318,3572 | 10  | 2,54951  | 4   | 0,974568 | 0,8      | 2,289246 | 4,428867 | 2,5528   |
| 2    | 0,647059 | 1    | 1    | 1    | 0   | 0,611111 | 325,4968 | 11  | 2,645751 | 5   | 0,87404  | 1        | 2,469241 | 4,896962 | 2,988493 |
| 2    | 0,647059 | 1    | 1    | 1    | 0   | 0,611111 | 411,6079 | 11  | 2,645751 | 5   | 0,823201 | 1        | 2,469241 | 4,854343 | 2,741909 |
| 2    | 0,647059 | 1    | 1    | 1    | 0   | 0,611111 | 344,1513 | 11  | 2,645751 | 5   | 0,95437  | 1        | 2,469241 | 5,215654 | 3,223022 |
| 2    | 0,647059 | 1    | 1    | 1    | 0   | 0,611111 | 351,7002 | 11  | 2,645751 | 5   | 0,886195 | 1        | 2,469241 | 5,085761 | 2,902225 |
| 2    | 0,647059 | 1    | 1    | 1    | 0   | 0,611111 | 321,4968 | 10  | 2,738613 | 4   | 0,888926 | 0,833333 | 2,571319 | 5,374142 | 3,232225 |
| 2    | 0,578947 | 1    | 1    | 1    | 0   | 0,55     | 377,2324 | 11  | 3        | 5   | 0,878492 | 0,857143 | 2,786115 | 6,231744 | 3,715693 |
| 2    | 0,578947 | 1    | 1    | 1    | 0   | 0,55     | 389,9036 | 12  | 2,915476 | 6   | 0,94422  | 1        | 2,720583 | 6,153613 | 3,771185 |
| 2    | 0,611111 | 1    | 1    | 1    | 0   | 0,578947 | 348,1513 | 11  | 2,828427 | 5   | 0,983088 | 1        | 2,710777 | 5,896591 | 3,749829 |
| 2    | 0,611111 | 1    | 1    | 1    | 0   | 0,578947 | 329,4968 | 11  | 2,828427 | 5   | 0,906985 | 1        | 2,710777 | 5,566504 | 3,501815 |
| 2    | 0,611111 | 1    | 1    | 1    | 0   | 0,578947 | 329,4968 | 11  | 2,828427 | 5   | 0,906985 | 0,833333 | 2,557728 | 5,566504 | 3,501815 |
| 3    | 0,714286 | 1    | 2    | 1    | 0   | 0,695652 | 371,4968 | 15  | 2,915476 | 6   | 0,879684 | 1        | 2,701376 | 5,861531 | 2,987199 |
| 2    | 0,52381  | 1    | 1    | 1    | 0   | 0,5      | 605,8302 | 14  | 3,741657 | 7   | 0,826526 | 0,857143 | 2,743308 | 6,068597 | 4,139496 |
| 2    | 0,611111 | 1    | 1    | 1    | 0   | 0,578947 | 343,1453 | 11  | 2,828427 | 5   | 1,028206 | 1        | 2,710777 | 6,068079 | 3,879575 |
| 2    | 0,611111 | 1    | 1    | 1    | 0   | 0,578947 | 355,7002 | 11  | 2,828427 | 5   | 0,917556 | 1        | 2,710777 | 5,762147 | 3,648534 |
| 3    | 0,7      | 2    | 1    | 1    | 1   | 0,5      | 434,9679 | 15  | 2,915476 | 6   | 0,83816  | 1        | 2,708695 | 5,510553 | 2,936824 |

| MAXDP    | Psi_i_A  | LOC      | X2v      | X4v      | X3sol    | X4sol    | AAC      | IDDE     | Ges | rGes     | IC1      | IC2      | IC3      | BIC2     |
|----------|----------|----------|----------|----------|----------|----------|----------|----------|-----|----------|----------|----------|----------|----------|
| 3,24845  | 2,697917 | 1,375    | 3,249757 | 1,269883 | 5,05055  | 3,978581 | 1,710338 | 3,625    | 13  | 0,8125   | 3,235085 | 3,509275 | 3,973661 | 0,692699 |
| 3,285927 | 2,637255 | 1,403374 | 3,749757 | 1,385291 | 5,461234 | 4,130277 | 1,670634 | 3,734522 | 14  | 0,823529 | 3,39123  | 3,851823 | 4,137538 | 0,742188 |
| 3,280718 | 2,681373 | 1,403374 | 4,3063   | 1,545951 | 6,038584 | 4,463611 | 1,891511 | 3,734522 | 14  | 0,823529 | 3,523856 | 3,763856 | 4,083856 | 0,742951 |
| 3,305096 | 2,685185 | 1,478028 | 3,612233 | 1,422749 | 5,869482 | 4,440895 | 1,717522 | 3,836592 | 15  | 0,833333 | 3,490688 | 3,935399 | 4,211261 | 0,752636 |
| 3,271266 | 2,761438 | 1,403374 | 3,82706  | 1,407607 | 5,749909 | 4,296944 | 1,891511 | 3,734522 | 14  | 0,823529 | 3,523856 | 3,763856 | 4,083856 | 0,742951 |
| 3,315431 | 2,685185 | 1,478028 | 3,615687 | 1,444819 | 5,801441 | 4,504522 | 1,717522 | 3,947703 | 17  | 0,944444 | 3,490688 | 4,07333  | 4,487123 | 0,779015 |
| 4,680756 | 2,990196 | 1,403374 | 3,390624 | 1,281619 | 5,05055  | 3,978581 | 1,891511 | 3,734522 | 14  | 0,823529 | 3,523856 | 3,763856 | 4,083856 | 0,742951 |
| 3,302565 | 2,637255 | 1,403374 | 3,698653 | 1,498592 | 5,517378 | 4,37899  | 1,670634 | 3,969816 | 15  | 0,882353 | 3,39123  | 3,923252 | 4,351823 | 0,755951 |
| 3,345964 | 2,684211 | 1,236188 | 3,951772 | 1,718288 | 6,730964 | 5,540008 | 1,765979 | 3,932138 | 18  | 0,947368 | 3,628085 | 4,066109 | 4,450212 | 0,777634 |
| 3,496129 | 3,096491 | 1,48586  | 3,687715 | 1,414876 | 6,160026 | 4,656061 | 1,850507 | 3,681881 | 15  | 0,789474 | 3,643776 | 3,865999 | 4,162295 | 0,739364 |
| 3,636227 | 3,096491 | 1,48586  | 3,69117  | 1,441223 | 6,098858 | 4,67346  | 1,850507 | 3,681881 | 17  | 0,894737 | 3,643776 | 4,014147 | 4,458591 | 0,767697 |
| 4,390911 | 3,404167 | 1,480482 | 3,958841 | 1,49094  | 5,461234 | 4,130277 | 2,002736 | 3,584184 | 15  | 0,75     | 3,637538 | 3,851823 | 4,137538 | 0,742188 |
| 3,298475 | 2,817901 | 1,408856 | 4,32702  | 1,615969 | 6,954016 | 4,776431 | 1,985451 | 4,058814 | 17  | 0,944444 | 3,623465 | 3,893661 | 4,323856 | 0,768573 |
| 3,188609 | 2,844444 | 1,429423 | 2,861033 | 1,071279 | 4,80055  | 3,801804 | 1,814849 | 2,656565 | 14  | 0,933333 | 3,606937 | 3,913977 | 4,186704 | 0,797649 |
| 3,209185 | 2,733333 | 1,429423 | 3,808727 | 1,720478 | 5,481737 | 4,446463 | 1,962354 | 2,656565 | 14  | 0,933333 | 3,606937 | 3,913977 | 4,186704 | 0,797649 |
| 3,293105 | 2,637255 | 1,403374 | 3,753211 | 1,466812 | 5,377677 | 4,282191 | 1,670634 | 3,969816 | 15  | 0,882353 | 3,39123  | 3,99468  | 4,423252 | 0,769714 |
| 5,372868 | 2,990196 | 1,403374 | 3,363578 | 1,317354 | 5,05055  | 3,978581 | 1,891511 | 3,969816 | 16  | 0,941176 | 3,523856 | 3,843856 | 4,323856 | 0,758742 |
| 3,286907 | 2,681373 | 1,403374 | 4,309754 | 1,709467 | 5,902055 | 4,789065 | 1,891511 | 3,969816 | 16  | 0,941176 | 3,523856 | 3,923856 | 4,403856 | 0,774534 |
| 3,281454 | 2,761438 | 1,403374 | 3,770778 | 1,537603 | 5,875792 | 4,700469 | 1,891511 | 3,969816 | 16  | 0,941176 | 3,523856 | 3,843856 | 4,323856 | 0,758742 |
| 3,238448 | 2,627451 | 1,565426 | 3,60331  | 1,44484  | 5,292132 | 4,22432  | 1,670634 | 3,219528 | 14  | 0,823529 | 3,281317 | 3,722907 | 4,137538 | 0,717347 |
| 3,286983 | 2,622807 | 1,656656 | 3,965786 | 1,597705 | 6,111064 | 4,686633 | 1,680893 | 3,932138 | 15  | 0,789474 | 3,483459 | 4,10141  | 4,35141  | 0,768076 |
| 3,280673 | 2,748538 | 1,591124 | 4,680573 | 1,790926 | 7,195598 | 5,02217  | 1,939363 | 4,142664 | 17  | 0,894737 | 3,628085 | 4,066109 | 4,450212 | 0,783477 |
| 3,26591  | 2,615741 | 1,58914  | 4,659853 | 1,720908 | 6,280166 | 4,70935  | 1,843294 | 3,725481 | 15  | 0,833333 | 3,539149 | 3,950212 | 4,235926 | 0,761146 |
| 3,270348 | 2,574074 | 1,58914  | 4,10331  | 1,560248 | 5,702816 | 4,376016 | 1,632702 | 3,725481 | 14  | 0,777778 | 3,388734 | 4,026619 | 4,284684 | 0,759198 |
| 3,275925 | 2,574074 | 1,58914  | 4,106765 | 1,641768 | 5,619259 | 4,52793  | 1,632702 | 3,725481 | 16  | 0,888889 | 3,388734 | 4,155652 | 4,542748 | 0,783526 |
| 3,384888 | 2,47619  | 1,368868 | 4,763994 | 2,270157 | 7,211321 | 6,15299  | 1,591563 | 4,106603 | 19  | 0,904762 | 3,298853 | 3,876838 | 4,454822 | 0,701873 |
| 4,427914 | 3,313492 | 1,65266  | 4,312394 | 1,665897 | 5,702816 | 4,376016 | 1,959526 | 3,748995 | 16  | 0,761905 | 3,655336 | 4,026619 | 4,284684 | 0,759198 |
| 3,269638 | 2,580741 | 1,58914  | 4,98981  | 1,816158 | 6,568841 | 4,876016 | 1,843294 | 3,725481 | 15  | 0,833333 | 3,539149 | 3,950212 | 4,235926 | 0,761146 |
| 3,257856 | 2,691358 | 1,58914  | 4,180614 | 1,582563 | 5,991491 | 4,542683 | 1,843294 | 3,725481 | 15  | 0,833333 | 3,539149 | 3,950212 | 4,235926 | 0,761146 |
| 3,321077 | 2,625    | 1,412675 | 4,305325 | 1,893245 | 6,972546 | 5,785747 | 1,735838 | 4,221928 | 18  | 0,9      | 3,615171 | 4,220168 | 4,5671   | 0,790316 |

| BIC3     | SpPosA_A | VE1_A    | VE1sign_A | VE3sign_A | J_D      | VE1sign_D | VE3sign_D | TI2_L    | SpMax_L  | SpMAD_L  | SpMAD_X  | VE1_X    | VE2_X    | VE3_X    |
|----------|----------|----------|-----------|-----------|----------|-----------|-----------|----------|----------|----------|----------|----------|----------|----------|
| 0,784365 | 0,642907 | 3,247545 | 0,001939  | -4,33991  | 1,697151 | 0,130136  | -1,41696  | 3,425003 | 4,834669 | 1,414279 | 0,598004 | 3,545482 | 0,221593 | 0,87948  |
| 0,79724  | 0,629521 | 3,324175 | 0,101759  | -1,68713  | 1,699982 | 0,11033   | -1,62742  | 3,51921  | 4,85577  | 1,427051 | 0,585084 | 3,465271 | 0,203839 | 0,917553 |
| 0,806116 | 0,629521 | 3,324175 | 0,101759  | -1,68713  | 1,699982 | 0,11033   | -1,62742  | 3,51921  | 4,85577  | 1,427051 | 0,585084 | 3,465271 | 0,203839 | 0,917553 |
| 0,805394 | 0,639073 | 3,398723 | 0,053744  | -2,2854   | 1,68951  | 0,074666  | -2,02838  | 3,645878 | 4,861636 | 1,414269 | 0,604533 | 3,487753 | 0,193764 | 0,976582 |
| 0,806116 | 0,629521 | 3,324175 | 0,101759  | -1,68713  | 1,699982 | 0,11033   | -1,62742  | 3,51921  | 4,85577  | 1,427051 | 0,585084 | 3,465271 | 0,203839 | 0,917553 |
| 0,858152 | 0,63878  | 3,384234 | 0,074009  | -2,03529  | 1,73828  | 0,140857  | -1,5322   | 3,60197  | 4,884538 | 1,413347 | 0,603887 | 3,505342 | 0,194741 | 0,980515 |
| 0,806116 | 0,629521 | 3,324175 | 0,101759  | -1,68713  | 1,699982 | 0,11033   | -1,62742  | 3,51921  | 4,85577  | 1,427051 | 0,585084 | 3,465271 | 0,203839 | 0,917553 |
| 0,83853  | 0,629917 | 3,268355 | 0,129344  | -1,51003  | 1,761627 | 0,181875  | -1,25839  | 3,438552 | 4,979968 | 1,426765 | 0,58707  | 3,514012 | 0,206707 | 0,927866 |
| 0,851093 | 0,650931 | 3,376838 | 0,016994  | -3,36244  | 1,453828 | 0,178582  | -1,42151  | 3,608838 | 4,964783 | 1,429824 | 0,583422 | 2,787669 | 0,146719 | 0,845958 |
| 0,79603  | 0,625492 | 3,493888 | 0,037824  | -2,70224  | 1,699532 | 0,078904  | -2,09551  | 3,763882 | 4,892308 | 1,450949 | 0,581466 | 3,52647  | 0,185604 | 1,039946 |
| 0,852696 | 0,625319 | 3,475413 | 0,017039  | -3,36026  | 1,76473  | 0,154501  | -1,54103  | 3,700982 | 4,927417 | 1,453911 | 0,580951 | 3,545887 | 0,186626 | 1,044477 |
| 0,79724  | 0,609146 | 3,54512  | 0,21888   | -1,31959  | 1,725282 | 0,107878  | -1,93414  | 3,863798 | 5,315138 | 1,484535 | 0,556187 | 3,576347 | 0,178817 | 1,106879 |
| 0,85349  | 0,626233 | 3,370119 | 0,01852   | -3,11824  | 1,747483 | 0,153168  | -1,4667   | 3,555775 | 4,938724 | 1,443177 | 0,585853 | 3,489702 | 0,193872 | 0,977019 |
| 0,85323  | 0,633846 | 3,201168 | 0,010718  | -2,95482  | 1,69124  | 0,139142  | -1,28481  | 3,339691 | 4,81047  | 1,404034 | 0,586657 | 2,669823 | 0,177988 | 0,639724 |
| 0,85323  | 0,633846 | 3,201168 | 0,010718  | -2,95482  | 1,69124  | 0,139142  | -1,28481  | 3,339691 | 4,81047  | 1,404034 | 0,586657 | 2,669823 | 0,177988 | 0,639724 |
| 0,852293 | 0,626202 | 3,31117  | 0,123362  | -1,54499  | 1,728691 | 0,150166  | -1,39983  | 3,497493 | 4,87462  | 1,434695 | 0,579678 | 3,478168 | 0,204598 | 0,920296 |
| 0,85349  | 0,629917 | 3,268355 | 0,129344  | -1,51003  | 1,761627 | 0,181875  | -1,25839  | 3,438552 | 4,979968 | 1,426765 | 0,58707  | 3,514012 | 0,206707 | 0,927866 |
| 0,869281 | 0,626202 | 3,31117  | 0,123362  | -1,54499  | 1,728691 | 0,150166  | -1,39983  | 3,497493 | 4,87462  | 1,434695 | 0,579678 | 3,478168 | 0,204598 | 0,920296 |
| 0,85349  | 0,629917 | 3,268355 | 0,129344  | -1,51003  | 1,761627 | 0,181875  | -1,25839  | 3,438552 | 4,979968 | 1,426765 | 0,58707  | 3,514012 | 0,206707 | 0,927866 |
| 0,79724  | 0,639264 | 3,245853 | 0,03307   | -2,51697  | 1,641029 | 0,172919  | -1,29567  | 3,941644 | 4,83432  | 1,402081 | 0,59646  | 3,608778 | 0,212281 | 0,947512 |
| 0,814894 | 0,636022 | 3,396035 | 0,075375  | -2,13327  | 1,644619 | 0,126278  | -1,70747  | 4,128237 | 4,861392 | 1,403789 | 0,602811 | 3,798851 | 0,19994  | 1,101339 |
| 0,857488 | 0,623876 | 3,367453 | 0,003059  | -4,77738  | 1,695194 | 0,198367  | -1,33481  | 4,052412 | 4,938634 | 1,430944 | 0,585118 | 3,823829 | 0,201254 | 1,106747 |
| 0,816198 | 0,625813 | 3,321523 | 0,126493  | -1,61628  | 1,6489   | 0,157431  | -1,44524  | 4,021493 | 4,855505 | 1,419328 | 0,583059 | 3,924814 | 0,218045 | 1,068874 |
| 0,807855 | 0,625813 | 3,321523 | 0,126493  | -1,61628  | 1,6489   | 0,157431  | -1,44524  | 4,021493 | 4,855505 | 1,419328 | 0,583059 | 3,924814 | 0,218045 | 1,068874 |
| 0,856511 | 0,623688 | 3,308453 | 0,100044  | -1,79966  | 1,673925 | 0,193842  | -1,28259  | 4,003179 | 4,874404 | 1,422135 | 0,579237 | 3,931626 | 0,218424 | 1,07023  |
| 0,806513 | 0,653363 | 3,540933 | 0,001904  | -5,7128   | 1,479882 | 0,295853  | -1,11074  | 4,010845 | 5,119288 | 1,420736 | 0,592501 | 3,800709 | 0,180986 | 1,217716 |
| 0,807855 | 0,607807 | 3,542985 | 0,209315  | -1,42632  | 1,683568 | 0,154076  | -1,70576  | 4,314962 | 5,315137 | 1,473676 | 0,55693  | 3,704392 | 0,1764   | 1,194306 |
| 0,816198 | 0,625813 | 3,321523 | 0,126493  | -1,61628  | 1,6489   | 0,157431  | -1,44524  | 4,021493 | 4,855505 | 1,419328 | 0,583059 | 3,924814 | 0,218045 | 1,068874 |
| 0,816198 | 0,625813 | 3,321523 | 0,126493  | -1,61628  | 1,6489   | 0,157431  | -1,44524  | 4,021493 | 4,855505 | 1,419328 | 0,583059 | 3,924814 | 0,218045 | 1,068874 |
| 0,855286 | 0,647768 | 3,374173 | 0,001535  | -5,62783  | 1,406176 | 0,222511  | -1,3053   | 4,096644 | 4,964721 | 1,417067 | 0,583154 | 2,842629 | 0,142131 | 0,90744  |

| VE1sign_X | SpMAD_H: | WiA_D/Dt | VE1_D/Dt | VE2_D/Dt | VE1sign_D,SM1_Dz(Z) | VE1sign_D | VE3sign_D | SM1_Dz(v) | VE1sign_D:VE3sign_D | Chi_Dz(p) | J_Dz(p)  | VE1_B(m) |          |          |
|-----------|----------|----------|----------|----------|---------------------|-----------|-----------|-----------|---------------------|-----------|----------|----------|----------|----------|
| 0,142389  | 1,251089 | 0,653646 | 3,116404 | 0,194775 | 0,145696            | 0,710847  | 0,215774  | -1,0654   | -1,04218            | 0,23761   | -0,99862 | 0,301267 | 1,707178 | 3,130331 |
| 0,087655  | 1,240364 | 0,668521 | 3,425181 | 0,201481 | 0,159802            | 0,710847  | 0,183507  | -1,25151  | -1,04218            | 0,232276  | -1,07779 | 0,290704 | 1,744222 | 3,189678 |
| 0,087655  | 1,240364 | 0,668521 | 3,425181 | 0,201481 | 0,159802            | 1,052319  | 0,242436  | -1,04167  | -0,95989            | 0,245571  | -1,0367  | 0,293251 | 1,759505 | 3,156133 |
| 0,05329   | 1,244023 | 0,685353 | 3,687086 | 0,204838 | 0,194179            | 0,826679  | 0,168503  | -1,39235  | -1,17384            | 0,123586  | -1,63446 | 0,260279 | 1,648435 | 3,246855 |
| 0,087655  | 1,240364 | 0,668521 | 3,425181 | 0,201481 | 0,159802            | 0,986851  | 0,230077  | -1,08149  | -1,01236            | 0,237262  | -1,06211 | 0,291852 | 1,751115 | 3,173506 |
| 0,091555  | 1,242388 | 0,661657 | 3,437899 | 0,190994 | 0,175769            | 0,826679  | 0,227617  | -1,15718  | -1,17384            | 0,179824  | -1,34127 | 0,264768 | 1,676861 | 3,244568 |
| 0,087655  | 1,240364 | 0,668521 | 3,425181 | 0,201481 | 0,159802            | 0,862488  | 0,208028  | -1,15022  | -1,21835            | 0,198235  | -1,19479 | 0,278958 | 1,67375  | 3,185216 |
| 0,062653  | 1,2418   | 0,643308 | 3,12538  | 0,183846 | 0,143728            | 0,710847  | 0,250676  | -1,02132  | -1,04218            | 0,282785  | -0,93252 | 0,297835 | 1,78701  | 3,171358 |
| 0,296593  | 1,256951 | 0,55649  | 3,576161 | 0,188219 | 0,223796            | 0,930475  | 0,262879  | -1,10267  | -1,29017            | 0,203546  | -1,31354 | 0,264779 | 1,390089 | 3,244334 |
| 0,220406  | 1,23165  | 0,70058  | 3,875374 | 0,203967 | 0,211638            | 0,985284  | 0,203802  | -1,3124   | -1,37437            | 0,149862  | -1,56619 | 0,253668 | 1,691122 | 3,393159 |
| 0,100215  | 1,23059  | 0,669281 | 3,542201 | 0,186432 | 0,192612            | 0,985284  | 0,27211   | -1,0739   | -1,37437            | 0,212327  | -1,27869 | 0,259704 | 1,731358 | 3,388451 |
| 0,388744  | 1,213409 | 0,714417 | 4,022399 | 0,20112  | 0,22131             | 1,110447  | 0,157347  | -1,57463  | -1,49828            | 0,128975  | -1,77899 | 0,237839 | 1,664875 | 3,405855 |
| 0,070509  | 1,226672 | 0,666208 | 3,578381 | 0,198799 | 0,150845            | 1,202922  | 0,288967  | -0,96587  | -0,98163            | 0,279437  | -0,99669 | 0,288584 | 1,827697 | 3,213863 |
| 0,296082  | 1,217709 | 0,666805 | 3,493614 | 0,232908 | 0,421433            | 0,826679  | 0,244353  | -0,91802  | -1,17384            | 0,172927  | -1,14321 | 0,291696 | 1,555711 | 3,299752 |
| 0,296082  | 1,217709 | 0,666805 | 3,493614 | 0,232908 | 0,421433            | 0,978595  | 0,287787  | -0,81115  | -0,985              | 0,22968   | -0,95831 | 0,317846 | 1,695176 | 3,470654 |
| 0,275892  | 1,239846 | 0,654558 | 3,278192 | 0,192835 | 0,149303            | 0,710847  | 0,220053  | -1,11748  | -1,04218            | 0,25967   | -0,99548 | 0,294071 | 1,764427 | 3,184197 |
| 0,062653  | 1,2418   | 0,643308 | 3,12538  | 0,183846 | 0,143728            | 0,862488  | 0,26868   | -0,96511  | -1,21835            | 0,256814  | -1,00365 | 0,284949 | 1,709692 | 3,171334 |
| 0,275892  | 1,239846 | 0,654558 | 3,278192 | 0,192835 | 0,149303            | 1,052319  | 0,27136   | -0,95942  | -0,95989            | 0,271446  | -0,96274 | 0,296761 | 1,780568 | 3,154965 |
| 0,062653  | 1,2418   | 0,643308 | 3,12538  | 0,183846 | 0,143728            | 0,986851  | 0,285098  | -0,92446  | -1,01236            | 0,286629  | -0,92256 | 0,299126 | 1,794755 | 3,165267 |
| 0,321922  | 1,251371 | 0,679297 | 3,410544 | 0,20062  | 0,210738            | 0,710847  | 0,289777  | -0,91439  | -1,04218            | 0,275731  | -0,95117 | 0,274148 | 1,644888 | 3,104901 |
| 0,119911  | 1,245642 | 0,70567  | 3,80628  | 0,200331 | 0,218336            | 0,826679  | 0,261225  | -1,10783  | -1,17384            | 0,190591  | -1,36781 | 0,240866 | 1,605772 | 3,22871  |
| 0,118373  | 1,234005 | 0,687769 | 3,690372 | 0,19423  | 0,173803            | 1,202922  | 0,363925  | -0,83083  | -0,98163            | 0,324     | -0,92996 | 0,26388  | 1,759201 | 3,197748 |
| 0,358151  | 1,246235 | 0,691472 | 3,577306 | 0,198739 | 0,190301            | 1,052319  | 0,317869  | -0,89296  | -0,95989            | 0,288514  | -0,9717  | 0,267617 | 1,694908 | 3,133203 |
| 0,358151  | 1,246235 | 0,691472 | 3,577306 | 0,198739 | 0,190301            | 0,710847  | 0,269877  | -1,02376  | -1,04218            | 0,277282  | -1,00274 | 0,265595 | 1,682101 | 3,172314 |
| 0,077607  | 1,241043 | 0,678229 | 3,510714 | 0,19504  | 0,200711            | 0,710847  | 0,300563  | -0,9396   | -1,04218            | 0,301288  | -0,93783 | 0,268359 | 1,699606 | 3,168292 |
| 0,030252  | 1,280445 | 0,543716 | 3,162185 | 0,15058  | 0,044532            | 0,710847  | 0,437149  | -0,75458  | -1,04218            | 0,460691  | -0,70684 | 0,276366 | 1,589104 | 3,427216 |
| 0,301574  | 1,215098 | 0,730562 | 4,106712 | 0,195558 | 0,236928            | 1,110447  | 0,252826  | -1,23602  | -1,49828            | 0,198535  | -1,47454 | 0,222121 | 1,628886 | 3,392978 |
| 0,358151  | 1,246235 | 0,691472 | 3,577306 | 0,198739 | 0,190301            | 1,072442  | 0,321101  | -0,88544  | -0,90349            | 0,295579  | -0,95279 | 0,268836 | 1,702628 | 3,124489 |
| 0,358151  | 1,246235 | 0,691472 | 3,577306 | 0,198739 | 0,190301            | 0,986851  | 0,307688  | -0,91926  | -1,01236            | 0,281486  | -0,99098 | 0,266508 | 1,687882 | 3,152662 |
| 0,377071  | 1,259733 | 0,582991 | 3,644528 | 0,182226 | 0,307538            | 0,930475  | 0,3466    | -0,9205   | -1,29017            | 0,26384   | -1,15732 | 0,245211 | 1,348661 | 3,230469 |

| VE1sign_B VE3sign_B AVS_B(v) | SpMAD_B( VE1_B(v) | VE1sign_B VE3sign_B AVS_B(e) | SpPosA_B( | SpMax_B(€ | VE1sign_B VE3sign_B SpMax_B(† | SpDiam_B( | SpMAD_B( |          |          |          |          |          |          |          |
|------------------------------|-------------------|------------------------------|-----------|-----------|-------------------------------|-----------|----------|----------|----------|----------|----------|----------|----------|----------|
| 0,025492                     | -2,54977          | 3,491728                     | 1,577033  | 3,319287  | 0,007961                      | -3,35846  | 3,656821 | 1,41492  | 3,840508 | 0,024954 | -2,56456 | 3,670664 | 5,352352 | 1,590935 |
| 0,093955                     | -1,74604          | 3,476332                     | 1,530852  | 3,346466  | 0,103335                      | -1,67578  | 3,631714 | 1,411418 | 3,849843 | 0,094271 | -1,74356 | 3,706369 | 5,419869 | 1,547266 |
| 0,006864                     | -3,67777          | 3,493308                     | 1,541195  | 3,346638  | 0,090375                      | -1,77472  | 3,641767 | 1,419709 | 3,850681 | 0,085592 | -1,81486 | 3,72575  | 5,430617 | 1,575914 |
| 0,029356                     | -2,75815          | 3,435802                     | 1,545708  | 3,413788  | 0,06645                       | -2,1195   | 3,61658  | 1,408671 | 3,85178  | 0,029892 | -2,74401 | 3,697747 | 5,425306 | 1,560444 |
| 0,036836                     | -2,43734          | 3,481679                     | 1,533954  | 3,346636  | 0,098912                      | -1,70807  | 3,647332 | 1,424406 | 3,851212 | 0,081288 | -1,85295 | 3,711056 | 5,421143 | 1,555767 |
| 0,083462                     | -1,94132          | 3,435802                     | 1,545266  | 3,40344   | 0,075939                      | -2,01516  | 3,61658  | 1,408555 | 3,855053 | 0,083065 | -1,94505 | 3,701876 | 5,436535 | 1,559951 |
| 0,068611                     | -1,97813          | 3,455549                     | 1,539207  | 3,344032  | 0,12442                       | -1,53869  | 3,658449 | 1,433986 | 3,852455 | 0,073585 | -1,92646 | 3,697394 | 5,426874 | 1,561317 |
| 0,111574                     | -1,61915          | 3,476332                     | 1,531506  | 3,303961  | 0,127604                      | -1,52003  | 3,631714 | 1,411889 | 3,864243 | 0,111947 | -1,61668 | 3,730246 | 5,469031 | 1,547965 |
| 0,029356                     | -2,91139          | 3,494276                     | 1,536967  | 3,387977  | 0,008092                      | -3,9747   | 3,697776 | 1,425435 | 3,882195 | 0,02894  | -2,92316 | 3,744394 | 5,508587 | 1,548556 |
| 0,080292                     | -2,08112          | 3,484637                     | 1,576661  | 3,285861  | 0,193083                      | -1,35709  | 3,709295 | 1,446931 | 3,893158 | 0,080601 | -2,07796 | 3,724822 | 5,676205 | 1,597667 |
| 0,03079                      | -2,87203          | 3,484637                     | 1,576577  | 3,30324   | 0,176422                      | -1,43155  | 3,709295 | 1,446633 | 3,902329 | 0,031872 | -2,84351 | 3,731645 | 5,68868  | 1,597648 |
| 0,075129                     | -2,24838          | 3,376987                     | 1,49066   | 3,613178  | 0,183693                      | -1,47182  | 3,630232 | 1,443053 | 3,864663 | 0,086427 | -2,1267  | 3,726647 | 5,51262  | 1,526771 |
| 0,02935                      | -2,75832          | 3,472858                     | 1,514953  | 3,369224  | 0,008783                      | -3,70148  | 3,639008 | 1,431531 | 3,871654 | 0,030272 | -2,73412 | 3,768362 | 5,520464 | 1,5289   |
| 0,042801                     | -2,05282          | 3,473663                     | 1,55879   | 3,49597   | 0,202641                      | -1,03991  | 3,690597 | 1,459297 | 3,866809 | 0,042223 | -2,06168 | 3,634665 | 5,295313 | 1,577389 |
| 0,075286                     | -1,68492          | 3,50515                      | 1,563025  | 3,178772  | 0,287429                      | -0,81221  | 3,67387  | 1,448624 | 3,851375 | 0,040997 | -2,08087 | 3,789288 | 5,44826  | 1,590589 |
| 0,150656                     | -1,39743          | 3,476332                     | 1,531605  | 3,334649  | 0,115629                      | -1,59279  | 3,631714 | 1,41182  | 3,852633 | 0,150064 | -1,40033 | 3,711611 | 5,430586 | 1,548302 |
| 0,08468                      | -1,82277          | 3,455549                     | 1,539823  | 3,296037  | 0,149776                      | -1,40175  | 3,658449 | 1,43435  | 3,87041  | 0,090068 | -1,77723 | 3,716359 | 5,479412 | 1,56189  |
| 0,060194                     | -2,07476          | 3,493308                     | 1,541944  | 3,335977  | 0,102709                      | -1,68026  | 3,641767 | 1,420123 | 3,853706 | 0,141234 | -1,4451  | 3,732931 | 5,442004 | 1,576783 |
| 0,04935                      | -2,22141          | 3,481679                     | 1,534563  | 3,305389  | 0,122833                      | -1,54817  | 3,647332 | 1,424813 | 3,867503 | 0,098301 | -1,71265 | 3,737228 | 5,470485 | 1,55634  |
| 0,007163                     | -3,64631          | 3,464567                     | 1,548577  | 3,233439  | 0,050974                      | -2,19751  | 3,619949 | 1,403977 | 3,837317 | 0,006471 | -3,7213  | 3,669551 | 5,348712 | 1,560653 |
| 0,042269                     | -2,61056          | 3,414655                     | 1,521538  | 3,364328  | 0,099318                      | -1,90565  | 3,585918 | 1,399658 | 3,849025 | 0,042906 | -2,59821 | 3,696955 | 5,423985 | 1,534204 |
| 0,017742                     | -3,3269           | 3,44976                      | 1,493584  | 3,337342  | 0,012587                      | -3,61014  | 3,607165 | 1,421142 | 3,86955  | 0,021782 | -3,1576  | 3,768022 | 5,519806 | 1,506803 |
| 0,023289                     | -2,93912          | 3,46768                      | 1,51865   | 3,28919   | 0,128578                      | -1,6035   | 3,607891 | 1,409414 | 3,847887 | 0,098228 | -1,81398 | 3,725204 | 5,429056 | 1,551253 |
| 0,1061                       | -1,75371          | 3,451647                     | 1,509393  | 3,291975  | 0,13941                       | -1,54027  | 3,598397 | 1,401607 | 3,847016 | 0,106522 | -1,75061 | 3,705662 | 5,418376 | 1,523577 |
| 0,13889                      | -1,54319          | 3,451647                     | 1,507253  | 3,285105  | 0,081833                      | -1,95673  | 3,598397 | 1,401702 | 3,849891 | 0,138199 | -1,54709 | 3,71093  | 5,429236 | 1,522074 |
| 0,017653                     | -3,68167          | 3,584909                     | 1,586691  | 3,504438  | 0,004819                      | -4,86586  | 3,710695 | 1,410067 | 3,951368 | 0,017352 | -3,69737 | 3,903239 | 5,805055 | 1,597087 |
| 0,065718                     | -2,48286          | 3,360845                     | 1,470631  | 3,586854  | 0,165285                      | -1,64171  | 3,602031 | 1,43364  | 3,8624   | 0,077182 | -2,33621 | 3,726106 | 5,511968 | 1,503026 |
| 0,012966                     | -3,39693          | 3,48388                      | 1,530123  | 3,286132  | 0,119951                      | -1,65779  | 3,599002 | 1,402097 | 3,847068 | 0,105956 | -1,75477 | 3,914723 | 5,610605 | 1,613595 |
| 0,051663                     | -2,31627          | 3,456697                     | 1,511954  | 3,291152  | 0,135702                      | -1,56135  | 3,613147 | 1,413838 | 3,848438 | 0,094117 | -1,84739 | 3,710391 | 5,419612 | 1,531328 |
| 0,019362                     | -3,42609          | 3,471362                     | 1,514517  | 3,354397  | 0,01441                       | -3,68268  | 3,664687 | 1,415686 | 3,880405 | 0,018872 | -3,44835 | 3,74394  | 5,507886 | 1,524566 |

| VE1_B(p) | VE2_B(p) | VE3sign_B | VE1_B(i) | VE1sign_B | VE1_B(s) | VE1sign_B | VE3sign_B | ATS5m    | ATS8m    | ATS4s    | ATS5s    | ATS6s    | ATS8s    | ATSC3m   |
|----------|----------|-----------|----------|-----------|----------|-----------|-----------|----------|----------|----------|----------|----------|----------|----------|
| 3,641392 | 0,227587 | -1,59998  | 3,111673 | 0,039974  | 3,024675 | 0,054825  | -2,01763  | 3,055744 | 2,333161 | 5,147501 | 5,190798 | 4,804938 | 4,548602 | 11,0212  |
| 3,489859 | 0,205286 | -1,91751  | 3,166924 | 0,084961  | 3,089474 | 0,049989  | -2,21191  | 3,111184 | 2,469353 | 5,263272 | 5,24849  | 4,878169 | 4,70351  | 11,92327 |
| 3,516974 | 0,206881 | -2,40228  | 3,166734 | 0,082226  | 3,080996 | 0,019107  | -2,92196  | 3,32524  | 2,826081 | 5,18101  | 5,19589  | 4,874356 | 4,563917 | 17,67059 |
| 3,526873 | 0,195937 | -2,14999  | 3,229837 | 0,022214  | 3,110425 | 0,035025  | -2,62011  | 3,186365 | 2,672727 | 5,321117 | 5,33326  | 5,008789 | 4,831645 | 11,84259 |
| 3,499915 | 0,205877 | -2,06675  | 3,166233 | 0,076882  | 3,066863 | 0,010144  | -3,38943  | 3,182402 | 2,578555 | 5,208683 | 5,208377 | 4,93488  | 4,584971 | 12,57028 |
| 3,501951 | 0,194553 | -1,85124  | 3,22746  | 0,099544  | 3,099074 | 0,067867  | -2,10301  | 3,291565 | 2,592035 | 5,32139  | 5,40143  | 5,090855 | 4,791884 | 11,84259 |
| 3,448666 | 0,202863 | -1,49785  | 3,163478 | 0,059855  | 3,04589  | 0,040243  | -2,37202  | 3,1239   | 2,46881  | 5,283775 | 5,243221 | 5,09     | 4,64279  | 10,70498 |
| 3,394997 | 0,199706 | -1,5995   | 3,150617 | 0,101739  | 3,019429 | 0,064736  | -2,02105  | 3,191851 | 2,457465 | 5,298047 | 5,371932 | 4,948373 | 4,644398 | 12,00809 |
| 3,460249 | 0,182118 | -3,78216  | 3,224283 | 0,039584  | 3,089568 | 0,047577  | -2,51294  | 3,294007 | 2,667845 | 5,330039 | 5,360776 | 5,08846  | 4,763839 | 10,50213 |
| 3,034224 | 0,159696 | -1,10224  | 3,377182 | 0,100753  | 3,164789 | 0,003039  | -4,78292  | 3,236005 | 2,868285 | 5,557262 | 5,440739 | 5,008791 | 5,118996 | 10,04628 |
| 3,074933 | 0,161839 | -1,14658  | 3,373457 | 0,033156  | 3,149626 | 0,101784  | -1,88541  | 3,381203 | 2,656009 | 5,536028 | 5,522354 | 5,415116 | 4,768802 | 10,04628 |
| 3,673516 | 0,183676 | -1,09982  | 3,388038 | 0,08925   | 3,184179 | 0,041146  | -2,77135  | 3,32133  | 3,104363 | 5,756888 | 5,583607 | 5,086921 | 5,383161 | 9,547606 |
| 3,452302 | 0,191795 | -3,47058  | 3,21422  | 0,039837  | 3,078347 | 0,048747  | -2,3617   | 3,435143 | 2,805057 | 5,273197 | 5,312481 | 5,041039 | 4,679043 | 14,60856 |
| 2,932536 | 0,195502 | -0,62348  | 3,484881 | 0,134577  | 3,103164 | 0,004666  | -3,49652  | 2,941371 | 2,286969 | 5,061018 | 5,08158  | 4,696185 | 4,637962 | 9,360622 |
| 2,680659 | 0,178711 | -0,61004  | 3,317448 | 0,104908  | 2,903207 | 0,069842  | -1,73382  | 3,00963  | 2,596022 | 5,004884 | 5,065933 | 4,641454 | 4,382023 | 11,82217 |
| 3,461911 | 0,203642 | -1,53302  | 3,161785 | 0,164232  | 3,072091 | 0,152179  | -1,39     | 3,177079 | 2,453823 | 5,254025 | 5,292751 | 4,995715 | 4,61787  | 11,92327 |
| 3,35335  | 0,197256 | -1,31098  | 3,150875 | 0,075376  | 2,997708 | 0,039019  | -2,39484  | 3,213113 | 2,489921 | 5,480413 | 5,403932 | 4,878591 | 4,749278 | 10,65703 |
| 3,490835 | 0,205343 | -1,64659  | 3,161705 | 0,161586  | 3,065615 | 0,123091  | -1,54662  | 3,613999 | 2,889485 | 5,180855 | 5,247759 | 4,87255  | 4,599183 | 17,67059 |
| 3,40572  | 0,200336 | -1,69357  | 3,151087 | 0,093362  | 3,01174  | 0,002107  | -4,54965  | 3,338114 | 2,614502 | 5,303587 | 5,289766 | 4,833198 | 4,617508 | 11,76516 |
| 3,38181  | 0,19893  | -1,67689  | 3,082394 | 0,019426  | 3,041202 | 0,052731  | -2,17248  | 3,025824 | 2,300832 | 5,204163 | 5,093757 | 5,103589 | 4,324141 | 13,63445 |
| 3,428474 | 0,180446 | -1,71181  | 3,210191 | 0,035855  | 3,120462 | 0,033571  | -2,80066  | 3,160157 | 2,649813 | 5,368961 | 5,24966  | 5,258657 | 4,66737  | 14,55884 |
| 3,385895 | 0,178205 | -2,87972  | 3,202248 | 0,031318  | 3,083835 | 0,047782  | -2,5094   | 3,414766 | 2,785012 | 5,323331 | 5,227048 | 5,283865 | 4,485519 | 18,77271 |
| 3,361062 | 0,186726 | -1,54074  | 3,147403 | 0,09543   | 3,090076 | 0,020438  | -3,04121  | 3,302469 | 2,806458 | 5,235855 | 5,099367 | 5,155541 | 4,343273 | 21,46193 |
| 3,359176 | 0,186621 | -1,44626  | 3,147771 | 0,098032  | 3,097484 | 0,051194  | -2,32341  | 3,082901 | 2,441198 | 5,313894 | 5,157146 | 5,158421 | 4,514525 | 14,54562 |
| 3,348196 | 0,186011 | -2,31194  | 3,144372 | 0,151561  | 3,079603 | 0,150941  | -1,47814  | 3,150623 | 2,425222 | 5,305105 | 5,20554  | 5,248488 | 4,410785 | 14,54562 |
| 3,538136 | 0,168483 | -3,92094  | 3,4108   | 0,023747  | 3,286626 | 0,031245  | -3,16097  | 3,450862 | 2,691458 | 5,465132 | 5,434941 | 5,410657 | 4,6228   | 16,09006 |
| 3,640919 | 0,173377 | -1,23227  | 3,374318 | 0,079371  | 3,19022  | 0,042129  | -2,88837  | 3,298469 | 3,089541 | 5,788092 | 5,519134 | 5,320032 | 5,291846 | 12,98934 |
| 3,362971 | 0,186832 | -1,62822  | 3,148245 | 0,102035  | 3,09651  | 0,045025  | -2,42378  | 3,436985 | 3,018696 | 5,223484 | 5,09294  | 5,133499 | 4,330918 | 32,3533  |
| 3,360023 | 0,186668 | -1,48285  | 3,146548 | 0,09035   | 3,077067 | 0,008684  | -3,71027  | 3,156088 | 2,55335  | 5,262071 | 5,113111 | 5,201565 | 4,369457 | 15,76506 |
| 3,404737 | 0,170237 | -3,19624  | 3,209755 | 0,029296  | 3,095251 | 0,046589  | -2,66343  | 3,270506 | 2,644818 | 5,377468 | 5,27954  | 5,321251 | 4,587524 | 13,59938 |

| ATSC4m   | ATSC5m   | ATSC6m   | ATSC7m   | ATSC8m   | ATSC3v   | ATSC6p   | ATSC7p   | ATSC8p   | ATSC3i   | ATSC6s   | ATSC7s   | MATS1m   | MATS2m   | MATS3m   |
|----------|----------|----------|----------|----------|----------|----------|----------|----------|----------|----------|----------|----------|----------|----------|
| 9,786909 | 6,976807 | 4,61628  | 5,041895 | 6,117931 | 4,678518 | 1,97971  | 2,327492 | 2,371541 | 0,583116 | 22,17443 | 14,37144 | 0,050394 | 0,047051 | -0,03653 |
| 13,06592 | 10,10529 | 5,334302 | 6,642619 | 7,727525 | 5,520692 | 2,280156 | 2,427018 | 2,824348 | 0,660218 | 20,35758 | 15,42394 | 0,050589 | 0,158037 | -0,1595  |
| 15,24265 | 3,762829 | 2,932162 | 5,453742 | 6,732621 | 4,620182 | 2,063072 | 2,671983 | 2,71687  | 0,582319 | 22,8688  | 15,85189 | 0,001593 | 0,027905 | -0,09631 |
| 11,55653 | 11,03888 | 7,756022 | 5,904284 | 8,082715 | 4,903621 | 2,871822 | 2,594611 | 2,534135 | 0,640617 | 30,65962 | 15,03913 | 0,056912 | 0,112777 | -0,12335 |
| 10,70847 | 5,731091 | 4,07474  | 5,415936 | 6,509677 | 4,347038 | 1,977154 | 2,429414 | 2,538887 | 0,563011 | 25,96634 | 20,44227 | 0,017741 | 0,069866 | -0,13083 |
| 11,55771 | 10,93714 | 7,488128 | 8,25088  | 7,896314 | 4,903621 | 2,890612 | 2,788629 | 2,819262 | 0,640617 | 27,18051 | 23,28706 | 0,056912 | 0,112777 | -0,12335 |
| 9,252719 | 6,226135 | 3,953059 | 4,857419 | 6,216028 | 4,010509 | 1,989048 | 2,361151 | 2,382919 | 0,704641 | 33,67324 | 34,17846 | 0,037819 | 0,08385  | -0,11554 |
| 12,25968 | 11,47584 | 7,782185 | 5,310264 | 8,394672 | 5,524556 | 2,731962 | 2,646288 | 3,164326 | 0,661974 | 29,52131 | 10,84177 | 0,050589 | 0,158037 | -0,09856 |
| 9,819215 | 8,797868 | 5,187811 | 5,926884 | 7,061615 | 4,253929 | 2,336934 | 2,500086 | 2,69073  | 0,647489 | 29,5567  | 23,41982 | 0,062339 | 0,058667 | -0,12651 |
| 10,10948 | 7,530876 | 3,496653 | 5,152358 | 6,913841 | 3,989958 | 2,106905 | 2,235497 | 2,50398  | 0,644833 | 37,35044 | 40,24121 | 0,059697 | 0,104764 | -0,03635 |
| 10,30498 | 6,514623 | 4,804693 | 5,3435   | 5,834261 | 3,989958 | 2,025817 | 2,485525 | 2,264561 | 0,644833 | 51,8099  | 49,17671 | 0,059697 | 0,104764 | -0,03635 |
| 11,32123 | 8,991389 | 2,997818 | 5,487847 | 7,616572 | 4,415462 | 2,349418 | 2,433976 | 2,89651  | 0,947622 | 54,43422 | 55,19371 | 0,02319  | 0,198241 | 0,028395 |
| 10,11563 | 5,61584  | 2,633571 | 4,462949 | 8,636707 | 4,100188 | 1,998669 | 2,409536 | 2,737498 | 0,546023 | 28,97862 | 26,60867 | 0,006184 | 0,07407  | 0,071728 |
| 6,529728 | 4,435857 | 3,553098 | 3,602279 | 4,928638 | 3,013112 | 1,585829 | 1,691053 | 1,622222 | 0,434699 | 25,34461 | 17,97067 | 0,056787 | 0,085979 | -0,05856 |
| 6,589115 | 3,821034 | 5,188621 | 5,503448 | 6,277148 | 3,352606 | 2,244341 | 2,354992 | 2,169041 | 0,522704 | 21,33323 | 12,80891 | 0,04957  | 0,017579 | -0,08289 |
| 13,15074 | 9,214223 | 7,595923 | 6,828881 | 6,208907 | 5,520692 | 2,345383 | 2,813598 | 2,657038 | 0,660218 | 28,0916  | 16,85366 | 0,050589 | 0,158037 | -0,1595  |
| 9,328844 | 6,350131 | 3,898455 | 4,941838 | 6,354971 | 4,06024  | 2,002344 | 2,384413 | 2,420218 | 0,726998 | 32,35978 | 42,4384  | 0,037819 | 0,08385  | -0,00602 |
| 11,01028 | 9,713193 | 2,92835  | 3,805269 | 15,32878 | 4,620182 | 2,271272 | 2,49137  | 3,172905 | 0,582319 | 22,40779 | 17,25266 | 0,001593 | 0,027905 | -0,09631 |
| 11,6012  | 7,427848 | 3,402024 | 6,794565 | 8,559935 | 4,359331 | 1,99633  | 2,506097 | 2,66458  | 0,561098 | 25,73758 | 22,08676 | 0,017741 | 0,069866 | -0,00273 |
| 12,50038 | 9,662464 | 6,678043 | 6,27907  | 6,632431 | 6,094635 | 2,282934 | 2,644497 | 2,791503 | 0,66516  | 35,83283 | 21,87231 | 0,050589 | 0,040086 | 0,018593 |
| 14,38049 | 13,53183 | 9,653207 | 7,275729 | 8,69947  | 6,330575 | 3,138196 | 2,906409 | 2,973513 | 0,721641 | 44,39437 | 23,82727 | 0,056963 | 0,095818 | -0,05108 |
| 14,18184 | 8,785596 | 4,794956 | 5,496816 | 8,975174 | 5,634007 | 2,411641 | 2,767219 | 3,099128 | 0,629765 | 38,96684 | 30,92312 | 0,008772 | 0,081048 | 0,130294 |
| 19,05745 | 6,899396 | 5,307162 | 6,817102 | 7,071744 | 6,156967 | 2,418025 | 3,012965 | 3,075248 | 0,668701 | 35,49879 | 22,60406 | 0,002691 | 0,033066 | -0,05895 |
| 15,54442 | 12,49389 | 7,45389  | 8,004953 | 8,29477  | 6,927965 | 2,57268  | 2,736994 | 3,254334 | 0,742691 | 36,38441 | 25,91756 | 0,050271 | 0,131998 | -0,09076 |
| 15,59895 | 11,79967 | 9,607317 | 8,160816 | 6,865367 | 6,927965 | 2,617146 | 3,123232 | 3,107867 | 0,742691 | 44,21965 | 26,45871 | 0,050271 | 0,131998 | -0,09076 |
| 15,24173 | 13,79523 | 11,3843  | 8,777399 | 8,18254  | 8,025275 | 3,711572 | 3,576394 | 3,85948  | 0,889266 | 46,51233 | 27,48395 | 0,053801 | 0,034345 | 0,026949 |
| 14,9467  | 11,90532 | 4,964241 | 6,706627 | 8,250829 | 5,909954 | 2,636345 | 2,742465 | 3,337606 | 1,011884 | 53,80643 | 58,98497 | 0,02528  | 0,19     | 0,096108 |
| 28,19264 | 5,929965 | 3,699098 | 7,944948 | 9,142272 | 6,510865 | 2,844578 | 3,657865 | 3,401102 | 0,723913 | 34,38199 | 20,88695 | 0,000172 | 0,017285 | -0,05198 |
| 14,00454 | 8,676993 | 6,199847 | 6,594152 | 6,963752 | 5,9174   | 2,31912  | 2,764438 | 2,917892 | 0,645899 | 37,78372 | 26,39682 | 0,020331 | 0,070844 | -0,05561 |
| 13,06288 | 11,55585 | 7,213658 | 7,163685 | 7,717692 | 5,805654 | 2,620862 | 2,809566 | 3,116413 | 0,729806 | 41,8435  | 30,32757 | 0,065371 | 0,061662 | -0,03558 |



| MATS4m   | MATS5m   | MATS6m   | MATS7m   | MATS8m   | MATS1v   | MATS2v   | MATS3v   | MATS4v   | MATS5v   | MATS6v   | MATS7v   | MATS8v   | MATS1e   | MATS2e   |
|----------|----------|----------|----------|----------|----------|----------|----------|----------|----------|----------|----------|----------|----------|----------|
| -0,25075 | -0,05894 | -0,2672  | -0,05536 | 0,355621 | -0,02651 | -0,17176 | 0,02216  | -0,02854 | -0,02652 | -0,28741 | -0,19145 | 0,099291 | 0,08424  | 0,261192 |
| -0,16708 | 0,167478 | -0,16318 | -0,17714 | 0,062556 | -0,02353 | -0,01256 | -0,12822 | -0,05585 | 0,160006 | -0,31262 | -0,13536 | -0,00336 | 0,092166 | 0,278366 |
| -0,17498 | 0,00827  | 0,036746 | 0,132024 | 0,159665 | -0,02272 | -0,08801 | -0,01224 | -0,12959 | 0,057499 | -0,26991 | -0,05339 | 0,266048 | 0,069119 | 0,238733 |
| -0,3798  | 0,082079 | 0,168138 | 0,060767 | 0,119781 | -0,05286 | 0,034544 | -0,0241  | -0,21127 | 0,016661 | 0,008658 | -0,21385 | 0,072646 | 0,040596 | 0,10691  |
| -0,34315 | -0,01482 | 0,014037 | 0,2426   | 0,381637 | -0,02489 | -0,10907 | -0,00379 | -0,11565 | 0,043936 | -0,28676 | -0,08104 | 0,249034 | 0,058801 | 0,213201 |
| -0,29393 | 0,104304 | -0,02617 | -0,03473 | -0,08666 | -0,05286 | 0,034544 | -0,0241  | -0,15348 | 0,016449 | -0,2361  | 0,002362 | -0,09775 | 0,040596 | 0,10691  |
| -0,39886 | -0,04262 | -0,09766 | 0,195096 | 0,489197 | -0,02754 | -0,15166 | 0,013579 | -0,07105 | 0,005685 | -0,303   | -0,14707 | 0,178963 | 0,038512 | 0,155405 |
| -0,22487 | -0,00075 | -0,21398 | -0,27275 | 0,318395 | -0,02353 | -0,01256 | -0,04197 | -0,17598 | 0,047902 | -0,12018 | -0,40501 | 0,106542 | 0,092166 | 0,278366 |
| -0,41692 | 0,091561 | 0,135852 | 0,048901 | 0,077813 | -0,05112 | 0,004413 | -0,037   | -0,17102 | 0,019439 | -0,14758 | -0,07184 | 0,014143 | -0,01546 | 0,089098 |
| -0,4065  | -0,20077 | -0,12484 | 0,267249 | 0,58623  | -0,02961 | -0,14317 | 0,013253 | -0,07699 | 0,010157 | -0,30039 | -0,12052 | 0,191841 | 0,182081 | 0,256471 |
| -0,32395 | -0,1178  | -0,13757 | 0,184132 | 0,307033 | -0,02961 | -0,14317 | 0,013253 | -0,00064 | -0,07147 | -0,23322 | -0,12098 | 0,03978  | 0,182081 | 0,256471 |
| -0,41291 | -0,32256 | -0,10737 | 0,326968 | 0,620534 | -0,02619 | -0,11555 | -0,02194 | -0,08704 | 0,058068 | -0,30361 | -0,09372 | 0,186557 | 0,008766 | 0,420289 |
| -0,3247  | -0,06509 | 0,08953  | 0,257726 | 0,06634  | -0,0229  | -0,04975 | 0,080358 | -0,08787 | -0,05588 | -0,24965 | 0,022147 | 0,113587 | 0,039454 | 0,173747 |
| -0,32105 | -0,17371 | -0,33595 | -0,14141 | 0,609521 | -0,0716  | -0,15388 | 0,093392 | -0,04173 | -0,13072 | -0,28612 | -0,28793 | 0,205701 | 0,002913 | 0,113264 |
| -0,14036 | -0,10702 | -0,45206 | -0,29566 | 0,628648 | -0,00629 | -0,11141 | 0,020541 | 0,006765 | -0,07585 | -0,39886 | -0,38794 | 0,232053 | 0,059577 | 0,234496 |
| -0,10503 | 0,006718 | -0,14352 | -0,25442 | 0,077646 | -0,02353 | -0,01256 | -0,12822 | 0,031972 | -0,11896 | -0,04778 | -0,21476 | -0,16518 | 0,092166 | 0,278366 |
| -0,29231 | -0,07073 | -0,22911 | -0,27065 | 0,167578 | -0,02754 | -0,15166 | 0,06949  | -0,06021 | -0,04353 | -0,27559 | -0,28135 | 0,052503 | 0,038512 | 0,155405 |
| -0,0854  | -0,06471 | 0,036612 | 0,073819 | -0,13218 | -0,02272 | -0,08801 | -0,01224 | 0,024115 | -0,12899 | -0,19856 | -0,05072 | -0,05066 | 0,069119 | 0,238733 |
| -0,23636 | -0,07165 | -0,12438 | -0,31744 | -0,02398 | -0,02489 | -0,10907 | 0,110351 | -0,09992 | -0,06514 | -0,22529 | -0,3607  | -0,01973 | 0,058801 | 0,213201 |
| -0,13248 | -0,38904 | -0,22499 | -0,02093 | 0,13249  | -0,02353 | -0,16774 | 0,046175 | 0,010099 | -0,04356 | -0,27246 | -0,20048 | -0,04169 | 0,092166 | 0,266306 |
| -0,26089 | -0,19094 | 0,11695  | 0,089028 | -0,01245 | -0,04815 | 0,002959 | 0,011127 | -0,14449 | -0,01438 | -0,04139 | -0,20598 | -0,02909 | 0,051469 | 0,124608 |
| -0,18927 | -0,18071 | 0,076269 | 0,198375 | 0,003494 | -0,02107 | -0,05513 | 0,12188  | -0,00387 | -0,03929 | -0,22083 | -0,0466  | -0,04424 | 0,048573 | 0,188893 |
| -0,12104 | -0,04583 | 0,034522 | 0,114889 | 0,120748 | -0,02077 | -0,09061 | 0,032444 | -0,05522 | 0,03114  | -0,2464  | -0,09363 | 0,090552 | 0,077719 | 0,247165 |
| -0,1016  | -0,15614 | -0,13574 | -0,1106  | -0,07781 | -0,02112 | -0,03501 | -0,07879 | -0,02827 | 0,099288 | -0,28988 | -0,14582 | -0,09766 | 0,098278 | 0,279203 |
| -0,04871 | -0,27866 | -0,13276 | -0,17957 | -0,07164 | -0,02112 | -0,03501 | -0,07879 | 0,045323 | -0,11861 | -0,08537 | -0,213   | -0,23523 | 0,098278 | 0,279203 |
| -0,13579 | -0,23088 | -0,06786 | -0,15033 | -0,1296  | 0,006813 | -0,10599 | 0,08898  | -0,06482 | -0,10153 | -0,07061 | -0,1553  | -0,23255 | 0,098414 | 0,258211 |
| -0,25176 | -0,4983  | -0,10505 | 0,275664 | 0,430326 | -0,02325 | -0,11675 | 0,027677 | -0,03304 | 0,021755 | -0,27703 | -0,12224 | 0,038288 | 0,014629 | 0,425245 |
| -0,08178 | -0,0093  | 0,019719 | 0,06241  | 0,073565 | -0,01794 | -0,06398 | 0,02272  | -0,06755 | 0,046918 | -0,21891 | -0,06219 | 0,113308 | 0,090087 | 0,267734 |
| -0,21353 | -0,21442 | 0,003916 | 0,201015 | 0,231406 | -0,02241 | -0,10972 | 0,038389 | -0,04425 | 0,017737 | -0,26229 | -0,11733 | 0,069464 | 0,067298 | 0,223205 |
| -0,25895 | -0,2048  | 0,095004 | 0,053896 | -0,05891 | -0,04469 | -0,01829 | 0,011585 | -0,09539 | -0,00791 | -0,16136 | -0,10243 | -0,09927 | 0,001147 | 0,117749 |

| MATS3e   | MATS4e   | MATS6e   | MATS7e   | MATS8e   | MATS1p   | MATS2p   | MATS3p   | MATS4p   | MATS5p   | MATS6p   | MATS7p   | MATS8p   | MATS2i   | MATS3i   |
|----------|----------|----------|----------|----------|----------|----------|----------|----------|----------|----------|----------|----------|----------|----------|
| -0,16713 | -0,39779 | 0,016799 | 0,073931 | 0,153415 | -0,04899 | -0,20549 | 0,01175  | 0,023175 | 0,107494 | -0,17706 | -0,21649 | -0,14469 | -0,15625 | -0,13296 |
| -0,16635 | -0,26569 | 0,085334 | -0,08052 | -0,04952 | -0,04607 | -0,06792 | -0,10253 | -0,03561 | 0,203191 | -0,29202 | -0,11175 | -0,08474 | -0,06201 | -0,18806 |
| -0,22906 | -0,48274 | 0,149839 | 0,266876 | 0,174905 | -0,02156 | -0,04816 | 0,004155 | -0,04364 | 0,203801 | -0,23112 | -0,14442 | 0,077907 | -0,11052 | -0,11319 |
| -0,22831 | -0,36198 | 0,280704 | 0,269042 | -0,04488 | -0,12047 | -0,00246 | -0,00256 | -0,11549 | 0,035319 | -0,00872 | -0,29437 | -0,07566 | -0,02637 | -0,124   |
| -0,23897 | -0,48276 | 0,185849 | 0,316952 | 0,170795 | -0,03488 | -0,10806 | 0,014878 | -0,0235  | 0,206274 | -0,24682 | -0,18691 | 0,016933 | -0,14258 | -0,12754 |
| -0,22831 | -0,33657 | 0,233247 | -0,054   | -0,16115 | -0,12047 | -0,00246 | -0,00256 | -0,10514 | 0,075318 | -0,25008 | -0,01968 | -0,13077 | -0,02637 | -0,124   |
| -0,23441 | -0,4397  | 0,215925 | 0,35475  | 0,148751 | -0,04878 | -0,20796 | 0,010123 | 0,02541  | 0,097248 | -0,16812 | -0,21426 | -0,15349 | -0,16881 | -0,12914 |
| -0,16205 | -0,26364 | -0,07953 | 0,026426 | 0,168229 | -0,04607 | -0,06792 | -0,02164 | -0,16398 | 0,118609 | 0,004041 | -0,37404 | -0,09169 | -0,06201 | -0,12446 |
| -0,22116 | -0,41986 | 0,331721 | 0,13798  | -0,10257 | -0,14555 | 0,003925 | -0,03685 | -0,0693  | 0,073994 | -0,16138 | -0,12739 | -0,10891 | -0,008   | -0,15063 |
| -0,18455 | -0,51001 | 0,042098 | 0,442879 | 0,394575 | 0,024219 | -0,17187 | -0,05429 | -0,00765 | 0,160607 | -0,24731 | -0,16678 | -0,12761 | -0,16176 | -0,1925  |
| -0,18455 | -0,49752 | 0,159337 | 0,349203 | 0,075848 | 0,024219 | -0,17187 | -0,05429 | 0,030397 | 0,009819 | -0,06463 | -0,18275 | -0,24638 | -0,16176 | -0,1925  |
| -0,10294 | -0,44087 | -0,05088 | 0,390341 | 0,408815 | -0,0455  | -0,03999 | -0,11922 | -0,04225 | 0,20027  | -0,29255 | -0,09955 | -0,09454 | 0,281078 | -0,21509 |
| -0,20654 | -0,55188 | 0,316516 | 0,314435 | 0,031786 | -0,02257 | -0,03091 | 0,146065 | 0,045327 | 0,06066  | -0,26498 | -0,0851  | -0,09431 | -0,12858 | -0,11754 |
| -0,18682 | -0,38783 | -0,14038 | -0,04021 | 0,652709 | -0,16041 | -0,25284 | 0,121124 | 0,032085 | 0,045996 | -0,1109  | -0,29915 | 0,001009 | -0,22963 | 0,008182 |
| -0,23565 | -0,54265 | 0,04301  | 0,110897 | 0,295278 | 0,037484 | -0,07139 | -0,07735 | 0,071548 | 0,162696 | -0,27402 | -0,4079  | -0,20057 | -0,08437 | -0,22534 |
| -0,16635 | -0,26131 | -0,03887 | -0,12512 | 0,104624 | -0,04607 | -0,06792 | -0,10253 | 0,046749 | -0,07949 | 0,019332 | -0,12852 | -0,31726 | -0,06201 | -0,18806 |
| -0,20676 | -0,31998 | -0,03907 | -0,11589 | -0,05194 | -0,04878 | -0,20796 | 0,001048 | 0,027253 | 0,109222 | -0,1807  | -0,20336 | -0,13668 | -0,16881 | -0,20296 |
| -0,22906 | -0,46277 | 0,154146 | 0,097538 | 0,063158 | -0,02156 | -0,04816 | 0,004155 | 0,1169   | -0,08904 | -0,13994 | -0,01905 | -0,22647 | -0,11052 | -0,11319 |
| -0,21663 | -0,37926 | -0,026   | -0,05755 | 0,01979  | -0,03488 | -0,10806 | 0,131317 | -0,06325 | 0,031003 | -0,07162 | -0,34071 | -0,22547 | -0,14258 | -0,10836 |
| -0,11485 | -0,28894 | 0,434498 | 0,243311 | 0,168152 | -0,04607 | -0,2066  | 0,020869 | 0,027425 | 0,101374 | -0,06965 | -0,19937 | -0,1415  | -0,16582 | -0,11367 |
| -0,16849 | -0,27907 | 0,52813  | 0,386212 | -0,00886 | -0,11165 | -0,03263 | 0,009379 | -0,08841 | 0,035618 | 0,03915  | -0,26378 | -0,07365 | -0,04849 | -0,10634 |
| -0,12416 | -0,39188 | 0,597287 | 0,385038 | 0,093186 | -0,02475 | -0,04631 | 0,153599 | 0,063936 | 0,092061 | -0,12003 | -0,08787 | -0,12157 | -0,14159 | -0,09824 |
| -0,15956 | -0,34871 | 0,527177 | 0,394587 | 0,198776 | -0,02306 | -0,05999 | 0,024685 | -0,01877 | 0,191041 | -0,12095 | -0,1345  | 0,032732 | -0,12491 | -0,09411 |
| -0,12156 | -0,20433 | 0,494436 | 0,107719 | -0,02294 | -0,0433  | -0,08722 | -0,07412 | -0,02551 | 0,174965 | -0,17227 | -0,11362 | -0,08529 | -0,07996 | -0,16181 |
| -0,12156 | -0,2003  | 0,322968 | 0,066072 | 0,117145 | -0,0433  | -0,08722 | -0,07412 | 0,044709 | -0,05365 | 0,063504 | -0,12796 | -0,28019 | -0,07996 | -0,16181 |
| -0,09471 | -0,19537 | 0,292497 | 0,059534 | 0,060337 | -0,00149 | -0,11772 | 0,096424 | -0,04089 | -0,05597 | 0,017803 | -0,08613 | -0,23671 | -0,07532 | 0,006713 |
| -0,05757 | -0,33739 | 0,116821 | 0,412002 | 0,447065 | -0,04278 | -0,06214 | -0,09082 | -0,03269 | 0,171504 | -0,17863 | -0,10243 | -0,09093 | 0,260379 | -0,19913 |
| -0,13127 | -0,31521 | 0,476657 | 0,298849 | 0,182419 | -0,00549 | 0,00755  | 0,000419 | -0,03438 | 0,139032 | -0,09639 | -0,07016 | 0,071692 | -0,0856  | -0,07495 |
| -0,16758 | -0,34895 | 0,524095 | 0,421775 | 0,19694  | -0,03464 | -0,11774 | 0,032586 | -0,00262 | 0,189442 | -0,11815 | -0,17251 | -0,02097 | -0,15383 | -0,10801 |
| -0,1562  | -0,31456 | 0,551886 | 0,225826 | -0,04262 | -0,1341  | -0,02597 | -0,01689 | -0,04687 | 0,071676 | -0,07443 | -0,127   | -0,10753 | -0,03124 | -0,12906 |

| MATS4i   | MATS5i   | MATS6i   | MATS7i   | MATS8i   | MATS1s   | MATS2s   | MATS3s   | MATS8s   | GATS1m   | GATS2m   | GATS3m   | GATS4m   | GATS5m   | GATS6m   |
|----------|----------|----------|----------|----------|----------|----------|----------|----------|----------|----------|----------|----------|----------|----------|
| -0,01726 | 0,233765 | 0,08686  | -0,14486 | -0,16881 | -0,00666 | 0,247741 | -0,15947 | 0,169116 | 0,612233 | 0,743604 | 1,024591 | 1,250112 | 1,019333 | 1,134039 |
| -0,06316 | 0,25504  | -0,21232 | 0,126937 | -0,09916 | -0,00954 | 0,270956 | -0,16938 | 0,091381 | 0,653993 | 0,674997 | 1,077137 | 1,171851 | 0,863691 | 1,013107 |
| -0,00695 | 0,308066 | -0,10152 | -0,15022 | -0,10823 | -0,00701 | 0,259578 | -0,18216 | 0,182622 | 0,462247 | 0,570084 | 1,070993 | 1,03202  | 0,456098 | 0,886186 |
| -0,10664 | 0,106805 | 0,1314   | -0,31387 | 0,073603 | -0,01517 | 0,221091 | -0,18719 | 0,051981 | 0,633646 | 0,741206 | 1,044721 | 1,308653 | 0,914355 | 0,79419  |
| -0,01332 | 0,264442 | 0,021765 | -0,14866 | -0,15023 | -0,01069 | 0,248076 | -0,19484 | 0,174033 | 0,4935   | 0,602539 | 1,126185 | 1,263174 | 0,70766  | 0,855139 |
| -0,10724 | 0,155821 | -0,14451 | 0,14688  | -0,12362 | -0,01517 | 0,222205 | -0,19617 | 0,020248 | 0,633646 | 0,741206 | 1,044721 | 1,22574  | 0,879967 | 0,928556 |
| -0,03615 | 0,055019 | 0,302642 | -0,1024  | -0,19431 | -0,01512 | 0,174261 | -0,18748 | 0,122731 | 0,552056 | 0,669648 | 1,11919  | 1,380159 | 0,95056  | 0,937725 |
| -0,2442  | 0,306372 | 0,156727 | -0,24406 | -0,12432 | -0,00792 | 0,266068 | -0,16275 | 0,143047 | 0,653993 | 0,674997 | 1,018373 | 1,180013 | 1,0214   | 1,187506 |
| -0,07115 | 0,161328 | -0,05272 | 0,044032 | -0,12123 | -0,02314 | 0,192275 | -0,18496 | 0,046628 | 0,561168 | 0,758464 | 1,062643 | 1,350781 | 0,908393 | 0,733624 |
| -0,06577 | 0,153934 | 0,119316 | 0,028372 | -0,18891 | 0,008401 | 0,279281 | -0,0883  | 0,195107 | 0,528414 | 0,648824 | 1,017978 | 1,411058 | 1,184787 | 0,917252 |
| -0,09241 | 0,178049 | 0,229801 | -0,14413 | -0,20053 | 0,008401 | 0,279903 | -0,0914  | 0,085029 | 0,528414 | 0,648824 | 1,017978 | 1,331557 | 1,009611 | 0,997211 |
| -0,17641 | 0,03485  | -0,18831 | 0,388647 | -0,12385 | -0,05965 | 0,434229 | -0,0463  | 0,155348 | 0,509198 | 0,565578 | 0,895832 | 1,423824 | 1,323382 | 0,836821 |
| 0,012967 | 0,215431 | 0,023255 | -0,13643 | -0,16324 | -0,01057 | 0,233236 | -0,17864 | 0,068208 | 0,465236 | 0,56973  | 0,938491 | 1,222928 | 0,85737  | 0,774432 |
| -0,11002 | 0,327617 | 0,066698 | -0,19755 | -0,03784 | -0,01367 | 0,22695  | -0,20702 | 0,424274 | 0,558263 | 0,710249 | 1,127998 | 1,25571  | 1,037133 | 1,227028 |
| -0,02151 | 0,426708 | -0,01638 | -0,27191 | -0,21104 | -0,00195 | 0,260217 | -0,20565 | 0,123083 | 0,637322 | 0,884149 | 1,161334 | 0,959768 | 0,782608 | 1,567074 |
| 0,001591 | -0,07468 | 0,338724 | -0,07267 | -0,26738 | -0,00954 | 0,271933 | -0,1744  | 0,143711 | 0,653993 | 0,674997 | 1,077137 | 1,112018 | 0,954905 | 1,094756 |
| 0,091199 | 0,134797 | -0,01362 | -0,05326 | -0,09735 | -0,01401 | 0,158447 | -0,16604 | -0,09784 | 0,552056 | 0,669648 | 1,014046 | 1,291137 | 0,995367 | 1,052512 |
| 0,055371 | 0,084027 | 0,090542 | -0,1024  | -0,1984  | -0,00701 | 0,260622 | -0,18939 | 0,121045 | 0,462247 | 0,570084 | 1,070993 | 0,946022 | 1,127294 | 0,886315 |
| -0,04981 | 0,239141 | 0,106871 | -0,16435 | -0,18105 | -0,00909 | 0,236853 | -0,18414 | 0,013263 | 0,4935   | 0,602539 | 1,003213 | 1,372895 | 1,047409 | 0,805489 |
| -0,01753 | 0,13476  | 0,173534 | -0,05566 | -0,11961 | 0,008255 | 0,257478 | -0,10856 | 0,096337 | 0,653993 | 0,777835 | 0,966591 | 1,14453  | 1,391132 | 1,142785 |
| -0,09286 | 0,048275 | 0,187274 | -0,21604 | 0,094757 | 0,000132 | 0,232346 | -0,13174 | -0,00074 | 0,668942 | 0,772048 | 0,991438 | 1,213965 | 1,191909 | 0,851287 |
| 0,007922 | 0,120373 | 0,133074 | -0,04197 | -0,11926 | 0,003759 | 0,246001 | -0,10524 | 0,045085 | 0,477094 | 0,570882 | 0,862345 | 1,089575 | 0,965978 | 0,747029 |
| -0,00861 | 0,199032 | 0,03026  | -0,05441 | -0,07529 | 0,007755 | 0,269307 | -0,12266 | 0,115263 | 0,468092 | 0,563506 | 1,001907 | 0,945733 | 0,494971 | 0,815102 |
| -0,05722 | 0,168604 | -0,08405 | 0,164702 | -0,06275 | 0,003491 | 0,275622 | -0,12329 | 0,022514 | 0,692299 | 0,718537 | 1,024486 | 1,104758 | 1,197209 | 1,05027  |
| -0,0005  | -0,11023 | 0,367621 | -0,00768 | -0,20685 | 0,003491 | 0,276556 | -0,12795 | 0,065503 | 0,692299 | 0,718537 | 1,024486 | 1,053578 | 1,273177 | 1,113073 |
| -0,08984 | -0,08202 | 0,178639 | 0,067306 | -0,17629 | 0,005636 | 0,241639 | -0,09711 | 0,040878 | 0,649976 | 0,769536 | 0,925468 | 1,091827 | 1,214351 | 1,066622 |
| -0,15669 | 0,007779 | -0,14626 | 0,380564 | -0,08152 | -0,05065 | 0,440146 | -0,00885 | 0,175297 | 0,536845 | 0,593621 | 0,834952 | 1,272413 | 1,495753 | 0,861547 |
| -0,00359 | 0,227604 | -0,07589 | -0,05155 | -0,03721 | 0,009454 | 0,269402 | -0,11695 | 0,112074 | 0,466274 | 0,562562 | 0,982523 | 0,883091 | 0,401049 | 0,836485 |
| -0,01425 | 0,159826 | 0,125623 | -0,0556  | -0,10577 | 0,004065 | 0,258799 | -0,13088 | 0,117513 | 0,518383 | 0,618857 | 1,037407 | 1,138118 | 0,931866 | 0,8476   |
| -0,06208 | 0,091246 | 0,038588 | 0,092963 | -0,08094 | -0,00794 | 0,209694 | -0,12607 | 0,004324 | 0,594666 | 0,774696 | 0,989615 | 1,22483  | 1,207433 | 0,798394 |

| GATS8m   | GATS2v   | GATS3v   | GATS4v   | GATS5v   | GATS6v   | GATS7v   | GATS8v   | GATS1e   | GATS2e   | GATS6e   | GATS7e   | GATS8e   | GATS2p   | GATS1i   |
|----------|----------|----------|----------|----------|----------|----------|----------|----------|----------|----------|----------|----------|----------|----------|
| 0,740745 | 1,091218 | 0,982471 | 0,910317 | 0,834194 | 1,16626  | 1,317076 | 1,074195 | 0,556329 | 0,467484 | 1,018261 | 0,515542 | 0,567428 | 1,186686 | 1,162597 |
| 0,981951 | 0,971996 | 1,097926 | 0,984731 | 0,743308 | 1,199596 | 1,138445 | 1,071675 | 0,547269 | 0,444671 | 0,941552 | 0,715525 | 0,982845 | 1,075882 | 1,189444 |
| 0,482075 | 0,941172 | 1,029542 | 1,022294 | 0,729432 | 1,116499 | 1,190779 | 0,942726 | 0,573466 | 0,494092 | 0,876041 | 0,381433 | 0,584295 | 0,847171 | 1,111545 |
| 0,909054 | 0,909117 | 0,985073 | 1,099879 | 0,936272 | 0,979986 | 1,260027 | 0,965522 | 0,654444 | 0,752768 | 0,641172 | 0,40887  | 0,819973 | 1,008649 | 1,286891 |
| 0,569021 | 0,990826 | 1,022086 | 1,009259 | 0,769822 | 1,133071 | 1,226667 | 0,995576 | 0,573361 | 0,511017 | 0,831915 | 0,374804 | 0,583335 | 1,005908 | 1,15671  |
| 1,120975 | 0,909117 | 0,985073 | 1,044079 | 0,901914 | 1,180382 | 1,051012 | 1,142676 | 0,654444 | 0,752768 | 0,652806 | 0,727046 | 1,161243 | 1,008649 | 1,286891 |
| 0,675673 | 1,074151 | 1,000741 | 0,961256 | 0,831378 | 1,160766 | 1,293318 | 1,074102 | 0,564381 | 0,543382 | 0,784503 | 0,424892 | 0,572173 | 1,18546  | 1,001048 |
| 0,729911 | 0,971996 | 1,014757 | 1,082713 | 0,820821 | 1,043551 | 1,470045 | 1,037927 | 0,547269 | 0,444671 | 1,265392 | 0,514244 | 0,468994 | 1,075882 | 1,189444 |
| 1,038142 | 0,895727 | 1,033656 | 1,067618 | 0,915801 | 1,028939 | 1,142599 | 1,129838 | 0,732198 | 0,808632 | 0,622424 | 0,611059 | 1,020221 | 0,983914 | 1,266008 |
| 0,618831 | 1,089045 | 1,040379 | 1,005725 | 0,881549 | 1,190108 | 1,196369 | 1,024547 | 0,461062 | 0,471237 | 0,824875 | 0,349947 | 0,564998 | 1,206794 | 1,129519 |
| 0,834162 | 1,089045 | 1,040379 | 0,932197 | 0,88081  | 1,045785 | 1,259742 | 1,187655 | 0,461062 | 0,471237 | 0,867735 | 0,535485 | 0,687442 | 1,206794 | 1,129519 |
| 0,566797 | 1,032205 | 1,087282 | 1,029788 | 0,845503 | 1,209319 | 1,134938 | 0,988423 | 0,590021 | 0,409569 | 0,785589 | 0,453923 | 0,563436 | 1,051805 | 0,931895 |
| 1,070444 | 0,906674 | 0,957939 | 1,002531 | 0,856955 | 1,06116  | 1,16957  | 1,179229 | 0,598052 | 0,55658  | 0,687412 | 0,417182 | 0,819389 | 0,873778 | 1,151542 |
| 0,630112 | 1,064004 | 0,923551 | 0,857332 | 0,91614  | 1,186703 | 1,422344 | 1,017845 | 0,696092 | 0,699046 | 1,199935 | 0,823549 | 0,301923 | 1,239039 | 1,315208 |
| 0,627507 | 1,020049 | 1,015754 | 0,79729  | 0,817839 | 1,345652 | 1,572618 | 1,021065 | 0,586478 | 0,504378 | 0,925324 | 0,441161 | 0,559687 | 1,050749 | 1,055514 |
| 0,880927 | 0,971996 | 1,097926 | 0,90005  | 0,988345 | 0,930739 | 1,262174 | 1,252671 | 0,547269 | 0,444671 | 1,052045 | 0,949519 | 0,566027 | 1,075882 | 1,189444 |
| 1,006359 | 1,074151 | 0,947066 | 0,909918 | 0,823625 | 1,169649 | 1,387034 | 1,127814 | 0,564381 | 0,543382 | 0,895648 | 1,010354 | 1,021844 | 1,18546  | 1,001048 |
| 1,502099 | 0,941172 | 1,029542 | 0,874736 | 0,937403 | 1,048002 | 1,169692 | 1,282378 | 0,573466 | 0,494092 | 0,871906 | 0,5349   | 0,709067 | 0,847171 | 1,111545 |
| 1,309431 | 0,990826 | 0,912507 | 0,981288 | 0,857244 | 1,085124 | 1,484074 | 1,232311 | 0,573361 | 0,511017 | 0,991379 | 0,778238 | 0,812747 | 1,005908 | 1,15671  |
| 0,837132 | 1,117542 | 0,963159 | 0,907192 | 0,861199 | 1,113231 | 1,217327 | 1,187641 | 0,547269 | 0,451921 | 0,792112 | 0,53613  | 0,30258  | 1,212382 | 1,189444 |
| 0,964972 | 0,960546 | 0,972174 | 1,068222 | 0,938359 | 0,970904 | 1,187616 | 1,0711   | 0,643044 | 0,725326 | 0,520207 | 0,43063  | 0,621371 | 1,055158 | 1,302895 |
| 1,039703 | 0,941478 | 0,92204  | 0,959777 | 0,862404 | 1,009708 | 1,072665 | 1,250668 | 0,576194 | 0,525307 | 0,510822 | 0,427843 | 0,567424 | 0,914973 | 1,178456 |
| 0,487266 | 0,975077 | 0,988116 | 0,982024 | 0,764609 | 1,057991 | 1,101424 | 1,056561 | 0,559154 | 0,473025 | 0,66505  | 0,410231 | 0,321362 | 0,884402 | 1,140459 |
| 1,038811 | 1,014333 | 1,065922 | 0,970592 | 0,781005 | 1,148413 | 1,086409 | 1,166467 | 0,541514 | 0,434595 | 0,740488 | 0,727285 | 0,734677 | 1,113237 | 1,212342 |
| 0,956026 | 1,014333 | 1,065922 | 0,899375 | 0,981651 | 0,928601 | 1,190675 | 1,332823 | 0,541514 | 0,434595 | 0,882465 | 0,944116 | 0,311141 | 1,113237 | 1,212342 |
| 1,059864 | 1,031573 | 0,91584  | 1,003899 | 0,981137 | 0,948921 | 1,116641 | 1,322028 | 0,528382 | 0,436208 | 0,941134 | 0,943342 | 0,434904 | 1,093539 | 1,060166 |
| 0,638176 | 1,061327 | 1,046396 | 1,000083 | 0,867186 | 1,150157 | 1,069408 | 1,100333 | 0,571164 | 0,390691 | 0,643589 | 0,444416 | 0,437253 | 1,090793 | 0,952686 |
| 0,464812 | 0,90271  | 0,990214 | 0,982661 | 0,700894 | 1,029649 | 1,057359 | 0,967416 | 0,552812 | 0,454996 | 0,74877  | 0,485287 | 0,30402  | 0,654087 | 1,047695 |
| 0,625374 | 1,022207 | 0,985257 | 0,976336 | 0,804038 | 1,076409 | 1,132211 | 1,111436 | 0,558427 | 0,488157 | 0,634187 | 0,39882  | 0,337976 | 1,042218 | 1,183657 |
| 1,067805 | 0,942795 | 1,005117 | 1,033855 | 0,920372 | 1,006887 | 1,079626 | 1,220516 | 0,713525 | 0,774447 | 0,492938 | 0,605782 | 0,809897 | 1,03057  | 1,283691 |

| GATS3i   | GATS4i   | GATS5i   | GATS6i   | GATS8i   | GATS2s   | GATS6s   | GATS7s   | GATS8s   | GGI1 | GGI3 | GGI4     | GGI7     | GGI8     | GGI9     |          |
|----------|----------|----------|----------|----------|----------|----------|----------|----------|------|------|----------|----------|----------|----------|----------|
| 1,07472  | 1,054533 | 0,845255 | 0,914417 | 0,968593 | 0,392196 | 0,892613 | 0,551605 | 0,779568 |      | 3    | 0,534722 | 0,566111 | 0,105903 | 0,082137 | 0,044375 |
| 1,169965 | 1,065692 | 0,761634 | 1,243742 | 0,915978 | 0,366091 | 0,838862 | 0,610814 | 0,80718  |      | 4    | 0,597222 | 0,757222 | 0,177969 | 0,106828 | 0,055625 |
| 1,059709 | 1,072377 | 0,802909 | 1,083281 | 0,915849 | 0,388279 | 0,849714 | 0,518033 | 0,787443 |      | 4    | 0,597222 | 0,757222 | 0,177969 | 0,106828 | 0,055625 |
| 1,116563 | 1,157426 | 0,898653 | 0,830962 | 0,875934 | 0,451898 | 0,665585 | 0,499632 | 0,822933 |      | 4    | 0,597222 | 0,797222 | 0,177969 | 0,138078 | 0,055625 |
| 1,070705 | 1,064235 | 0,838357 | 0,973305 | 0,958576 | 0,401658 | 0,822922 | 0,524579 | 0,78332  |      | 4    | 0,597222 | 0,757222 | 0,177969 | 0,106828 | 0,055625 |
| 1,116563 | 1,157997 | 0,860369 | 1,161134 | 0,956501 | 0,450971 | 0,678405 | 0,581014 | 0,888647 |      | 4    | 0,722222 | 0,877222 | 0,177969 | 0,082137 | 0,084375 |
| 1,069987 | 0,96791  | 0,748978 | 0,710915 | 0,87535  | 0,466284 | 0,808584 | 0,633778 | 0,713909 |      | 4    | 0,597222 | 0,757222 | 0,177969 | 0,106828 | 0,055625 |
| 1,108638 | 1,271785 | 0,773231 | 0,791893 | 0,935577 | 0,370803 | 0,825069 | 0,545975 | 0,683046 |      | 3,5  | 0,972222 | 0,712222 | 0,105903 | 0,131519 | 0,044375 |
| 1,128968 | 1,11539  | 0,864769 | 1,084012 | 0,945778 | 0,469384 | 0,726031 | 0,58689  | 0,882108 |      | 4    | 0,729167 | 0,903333 | 0,168403 | 0,088695 | 0,080316 |
| 1,16397  | 1,040793 | 0,82479  | 0,931605 | 0,983942 | 0,382274 | 0,767615 | 0,556131 | 0,760583 |      | 4,5  | 0,847222 | 0,837222 | 0,199653 | 0,194019 | 0,075625 |
| 1,16397  | 1,066442 | 0,864076 | 0,812101 | 1,072924 | 0,381675 | 0,979768 | 0,642314 | 0,73359  |      | 4,5  | 0,847222 | 0,917222 | 0,250035 | 0,106828 | 0,084375 |
| 0,939474 | 1,112545 | 0,905209 | 0,97008  | 0,95426  | 0,368711 | 0,730227 | 0,613623 | 0,770734 |      | 6    | 1,097222 | 0,877222 | 0,252586 | 0,249961 | 0,095625 |
| 1,062338 | 1,05337  | 0,892782 | 0,968141 | 0,958695 | 0,430307 | 0,79318  | 0,544585 | 0,924149 |      | 4,5  | 0,784722 | 1,028333 | 0,209219 | 0,106828 | 0,095625 |
| 0,898866 | 1,137827 | 0,753204 | 0,864559 | 0,79371  | 0,438919 | 1,022466 | 0,702892 | 0,699    |      | 3    | 0,375    | 0,625    | 0,103316 | 0,067515 | 0,049383 |
| 1,164917 | 1,059754 | 0,617095 | 0,987415 | 1,007632 | 0,388023 | 0,919177 | 0,590115 | 0,975555 |      | 3    | 0,375    | 0,625    | 0,103316 | 0,067515 | 0,049383 |
| 1,169965 | 1,003251 | 1,121862 | 0,740303 | 1,129144 | 0,365148 | 0,829226 | 0,606254 | 0,769765 |      | 4    | 0,722222 | 0,837222 | 0,137153 | 0,082137 | 0,084375 |
| 1,140855 | 1,03678  | 0,929211 | 0,850161 | 1,098357 | 0,481465 | 0,796941 | 1,05963  | 1,212412 |      | 3,5  | 0,972222 | 0,712222 | 0,105903 | 0,131519 | 0,044375 |
| 1,059709 | 1,012554 | 1,00899  | 0,8989   | 0,99134  | 0,387277 | 0,862552 | 0,557127 | 0,832873 |      | 4    | 0,722222 | 0,837222 | 0,137153 | 0,082137 | 0,084375 |
| 1,052289 | 1,087154 | 0,846369 | 0,902021 | 0,968129 | 0,412432 | 0,89311  | 0,706216 | 0,966749 |      | 3,5  | 0,972222 | 0,712222 | 0,105903 | 0,131519 | 0,044375 |
| 1,052267 | 1,028109 | 0,91063  | 0,882166 | 0,975037 | 0,376159 | 0,637973 | 0,722824 | 0,468084 |      | 3    | 0,659722 | 0,406111 | 0,125035 | 0,082137 | 0,065625 |
| 1,091425 | 1,125523 | 0,947247 | 0,822157 | 0,892634 | 0,435427 | 0,492992 | 0,666508 | 0,564252 |      | 4    | 0,722222 | 0,637222 | 0,197102 | 0,138078 | 0,085625 |
| 1,041298 | 1,0277   | 0,954369 | 0,927439 | 0,966247 | 0,406097 | 0,553213 | 0,690365 | 0,613198 |      | 4,5  | 0,909722 | 0,868333 | 0,228352 | 0,131519 | 0,085625 |
| 1,037493 | 1,041694 | 0,875409 | 1,020507 | 0,92662  | 0,370725 | 0,59618  | 0,691528 | 0,470524 |      | 4    | 0,722222 | 0,597222 | 0,197102 | 0,106828 | 0,085625 |
| 1,13909  | 1,046533 | 0,832049 | 1,163713 | 0,928688 | 0,354938 | 0,6048   | 0,769387 | 0,535792 |      | 4    | 0,722222 | 0,597222 | 0,197102 | 0,106828 | 0,085625 |
| 1,13909  | 0,991646 | 1,140353 | 0,742279 | 1,119549 | 0,354035 | 0,640922 | 0,765154 | 0,469188 |      | 4    | 0,847222 | 0,677222 | 0,156285 | 0,106828 | 0,065625 |
| 0,958428 | 1,121586 | 1,153947 | 0,898625 | 1,055071 | 0,371547 | 0,581508 | 0,748391 | 0,473615 |      | 3,5  | 1,159722 | 0,765556 | 0,17191  | 0,090199 | 0,09125  |
| 0,9143   | 1,072234 | 0,889947 | 0,906504 | 0,950612 | 0,351028 | 0,582675 | 0,6474   | 0,631232 |      | 6    | 1,222222 | 0,717222 | 0,271719 | 0,249961 | 0,125625 |
| 1,019267 | 1,030514 | 0,804057 | 1,107462 | 0,851784 | 0,368927 | 0,610306 | 0,699511 | 0,466123 |      | 4    | 0,722222 | 0,597222 | 0,197102 | 0,106828 | 0,085625 |
| 1,048692 | 1,036637 | 0,907342 | 0,931342 | 0,966156 | 0,382336 | 0,579007 | 0,684383 | 0,47931  |      | 4    | 0,722222 | 0,597222 | 0,197102 | 0,106828 | 0,085625 |
| 1,102142 | 1,086814 | 0,919441 | 1,035604 | 0,955434 | 0,451471 | 0,52657  | 0,733597 | 0,599708 |      | 4    | 0,854167 | 0,743333 | 0,187535 | 0,113387 | 0,070316 |

| GGI10    | SpMax3_B | SpMax4_B | SpMax5_B | SpMax6_B | SpMax7_B | SpMax8_B | SpMax5_B | SpMax4_B | SpMax8_B | SpMin1_Bf | SpMin3_Bf | SpMin4_Bf | SpMin5_Bf | SpMin6_Bf |
|----------|----------|----------|----------|----------|----------|----------|----------|----------|----------|-----------|-----------|-----------|-----------|-----------|
| 0,024691 | 3,561905 | 2,880962 | 2,68665  | 2,582704 | 1,954053 | 1,891111 | 2,715168 | 2,807938 | 3,441495 | 2,014761  | 1,303935  | 1,216585  | 1,180549  | 0,765676  |
| 0,057749 | 3,579044 | 2,999528 | 2,739725 | 2,68665  | 2,238227 | 1,950957 | 2,715168 | 2,980285 | 3,614738 | 2,040256  | 1,556578  | 1,275885  | 1,180549  | 1,069026  |
| 0,057749 | 3,687571 | 3,52084  | 2,836322 | 2,68665  | 2,44893  | 1,951859 | 2,715168 | 2,887805 | 3,52661  | 1,965659  | 1,28467   | 1,180549  | 1,138199  | 0,707804  |
| 0,057749 | 3,577975 | 3,069209 | 2,808262 | 2,68665  | 2,498944 | 1,953983 | 2,739222 | 2,954919 | 3,674222 | 1,992121  | 1,573656  | 1,285094  | 1,180549  | 1,148332  |
| 0,057749 | 3,618384 | 3,251861 | 2,788147 | 2,68665  | 2,270413 | 1,950745 | 2,715168 | 2,843488 | 3,674222 | 1,975818  | 1,286365  | 1,180549  | 1,151152  | 0,70782   |
| 0,057749 | 3,575199 | 3,066307 | 2,860778 | 2,607809 | 2,524795 | 1,954058 | 2,810065 | 2,964121 | 3,516235 | 1,992303  | 1,573226  | 1,297671  | 1,212396  | 1,06592   |
| 0,057749 | 3,57641  | 2,933809 | 2,68665  | 2,668049 | 1,980787 | 1,942291 | 2,715168 | 2,806352 | 3,674222 | 1,985687  | 1,288621  | 1,180549  | 1,165619  | 0,707883  |
| 0,024691 | 3,568991 | 2,967169 | 2,869176 | 2,604189 | 2,227924 | 1,950962 | 2,81445  | 3,022834 | 3,499681 | 2,039548  | 1,552602  | 1,300911  | 1,212951  | 1,006335  |
| 0,070807 | 3,5985   | 3,156293 | 2,824633 | 2,681255 | 2,367175 | 1,954285 | 2,767022 | 2,987901 | 3,673739 | 1,949483  | 1,439644  | 1,283744  | 1,150207  | 1,051148  |
| 0,057749 | 3,624774 | 3,377472 | 2,824153 | 2,68665  | 2,438871 | 1,952054 | 2,715168 | 2,989963 | 3,751771 | 2,011604  | 1,339139  | 1,252673  | 1,180549  | 0,933243  |
| 0,090807 | 3,618362 | 3,390966 | 2,866168 | 2,603815 | 2,456611 | 1,954005 | 2,808814 | 3,015408 | 3,781493 | 2,011558  | 1,323532  | 1,267529  | 1,209636  | 0,792255  |
| 0,074278 | 3,604753 | 3,292834 | 2,819677 | 2,68665  | 2,437565 | 1,952128 | 2,715168 | 2,972909 | 3,858092 | 2,004877  | 1,308699  | 1,228109  | 1,180549  | 0,845411  |
| 0,057749 | 3,62181  | 3,400261 | 3,211191 | 2,782383 | 2,462599 | 2,047356 | 2,76207  | 2,856264 | 3,678149 | 1,938407  | 1,283619  | 1,16077   | 1,031634  | 0,707793  |
| 0        | 3,546101 | 2,826553 | 2,331968 | 2,233479 | 1,950357 | 1,742372 | 2,26302  | 2,706454 | 3,238369 | 1,869897  | 1,449495  | 1,262137  | 0,824443  | 0,707759  |
| 0        | 3,583343 | 2,828452 | 2,682437 | 2,331241 | 1,950779 | 1,798029 | 2,269285 | 2,706482 | 3,095507 | 1,869716  | 1,334594  | 1,242316  | 0,792427  | 0,707756  |
| 0,024691 | 3,576073 | 2,98414  | 2,84207  | 2,595553 | 2,194893 | 1,953936 | 2,804871 | 3,005231 | 3,461807 | 2,039946  | 1,555072  | 1,294077  | 1,211533  | 0,946134  |
| 0,024691 | 3,567758 | 2,89132  | 2,814034 | 2,598091 | 1,977182 | 1,941545 | 2,73406  | 2,80766  | 3,545033 | 1,986557  | 1,302471  | 1,213833  | 1,103946  | 0,707954  |
| 0,024691 | 3,687482 | 3,528291 | 2,869025 | 2,606084 | 2,47171  | 1,953993 | 2,772406 | 2,889806 | 3,45144  | 1,965977  | 1,297597  | 1,212279  | 1,04345   | 0,763645  |
| 0,024691 | 3,590295 | 3,28858  | 2,875403 | 2,607247 | 2,25848  | 1,950806 | 2,764681 | 2,82622  | 3,516023 | 1,976958  | 1,302242  | 1,213641  | 1,085565  | 0,707851  |
| 0,037241 | 3,608014 | 3,077735 | 2,68665  | 2,673217 | 2,263313 | 1,933363 | 2,715168 | 2,970403 | 3,533952 | 2,015092  | 1,499666  | 1,249557  | 1,180549  | 0,976954  |
| 0,045404 | 3,625452 | 3,129821 | 2,980839 | 2,68665  | 2,561843 | 2,255941 | 2,881197 | 3,017881 | 3,674222 | 1,992812  | 1,574476  | 1,497248  | 1,180549  | 1,166682  |
| 0,078461 | 3,665064 | 3,400717 | 3,250173 | 3,000427 | 2,496576 | 2,282837 | 2,76697  | 2,995135 | 3,739663 | 1,947961  | 1,497727  | 1,173645  | 1,040326  | 0,96881   |
| 0,045404 | 3,6995   | 3,559448 | 3,059649 | 2,68665  | 2,532525 | 2,235119 | 2,715168 | 3,012516 | 3,605258 | 1,967789  | 1,498135  | 1,180549  | 1,156565  | 0,972847  |
| 0,045404 | 3,62684  | 3,110615 | 2,889276 | 2,68665  | 2,355401 | 2,167254 | 2,829355 | 3,061857 | 3,674222 | 2,040398  | 1,561593  | 1,490975  | 1,180549  | 1,084511  |
| 0,070299 | 3,624244 | 3,096789 | 2,934177 | 2,675711 | 2,274519 | 2,187358 | 2,923774 | 3,048326 | 3,546929 | 2,040101  | 1,558149  | 1,494956  | 1,23579   | 0,98025   |
| 0,090909 | 3,655383 | 3,34103  | 3,089018 | 2,872645 | 2,539329 | 2,399067 | 3,032882 | 3,316179 | 3,684434 | 2,153893  | 1,670338  | 1,499362  | 1,319969  | 1,045739  |
| 0,078461 | 3,650285 | 3,311848 | 3,040441 | 2,68665  | 2,513885 | 2,236771 | 2,867043 | 3,056978 | 3,948364 | 2,005322  | 1,499644  | 1,264892  | 1,180549  | 0,979218  |
| 0,045404 | 3,70344  | 3,572753 | 3,06295  | 2,68665  | 2,555241 | 2,240333 | 2,715942 | 3,234554 | 3,539186 | 1,964289  | 1,498049  | 1,180549  | 1,151748  | 0,972613  |
| 0,045404 | 3,662111 | 3,28258  | 3,015154 | 2,68665  | 2,387993 | 2,175461 | 2,715168 | 2,988534 | 3,674222 | 1,977159  | 1,498372  | 1,180549  | 1,170427  | 0,973495  |
| 0,065404 | 3,646461 | 3,194658 | 3,009268 | 2,719275 | 2,422926 | 2,237477 | 2,895699 | 3,052759 | 3,73891  | 1,954497  | 1,49813   | 1,439279  | 1,164851  | 1,055649  |

| SpMin7_Bf | SpMin8_Bf | SpMin3_Bf | SpMin5_Bf | SpMin1_Bf | SpMin2_Bf | SpMin3_Bf | SpMin4_Bf | SpMin6_Bf | SpMin3_Bf | SpMin4_Bf | SpMin6_Bf | P_VSA_Log | P_VSA_Log | P_VSA_Log |
|-----------|-----------|-----------|-----------|-----------|-----------|-----------|-----------|-----------|-----------|-----------|-----------|-----------|-----------|-----------|
| 0,707746  | 0,55381   | 1,434721  | 1,10684   | 1,98059   | 1,914046  | 1,523253  | 1,396822  | 0,988207  | 1,190665  | 1,080198  | 0         | 0         | 5,069063  | 47,38124  |
| 0,707791  | 0,639993  | 1,518927  | 1,188123  | 2,002148  | 1,914877  | 1,524849  | 1,507986  | 1,06232   | 1,259738  | 1,149736  | 0,088193  | 8,825204  | 5,069063  | 37,90499  |
| 0,668594  | 0,553298  | 1,433248  | 1,10684   | 1,960384  | 1,912814  | 1,523185  | 1,371645  | 0,979225  | 1,192045  | 1,084505  | 0         | 0         | 5,069063  | 37,90499  |
| 0,707832  | 0,687138  | 1,547356  | 1,280083  | 1,987665  | 1,91442   | 1,546817  | 1,522433  | 1,06232   | 1,219989  | 1,145149  | 0,197544  | 10,88306  | 5,069063  | 37,90499  |
| 0,680498  | 0,553376  | 1,433397  | 1,10684   | 1,965428  | 1,913213  | 1,5232    | 1,377534  | 0,980908  | 1,191119  | 1,081658  | 0         | 0         | 5,069063  | 37,90499  |
| 0,764107  | 0,707745  | 1,541604  | 1,318537  | 1,987805  | 1,914415  | 1,535857  | 1,522308  | 0,997706  | 1,206077  | 1,139887  | 0,138734  | 10,88306  | 5,069063  | 37,90499  |
| 0,695281  | 0,553462  | 1,433898  | 1,10684   | 1,982245  | 1,914114  | 1,52326   | 1,399082  | 0,989301  | 1,1885    | 1,072581  | 0         | 0         | 5,069063  | 37,90499  |
| 0,707796  | 0,640438  | 1,46954   | 1,335126  | 2,003309  | 1,914704  | 1,523267  | 1,418235  | 0,994489  | 1,190925  | 1,130898  | 0,046194  | 8,825204  | 5,069063  | 37,90499  |
| 0,707803  | 0,666318  | 1,487292  | 1,295873  | 1,95788   | 1,912637  | 1,523799  | 1,521047  | 0,988904  | 1,189974  | 1,133306  | 0,12322   | 0         | 11,7193   | 28,42874  |
| 0,707778  | 0,586598  | 1,589176  | 1,200282  | 2,081399  | 1,916173  | 1,697286  | 1,522948  | 1,06232   | 1,276898  | 1,154189  | 0         | 5,670051  | 5,069063  | 37,90499  |
| 0,747302  | 0,707745  | 1,576803  | 1,299143  | 2,081849  | 1,916013  | 1,687017  | 1,523021  | 0,991655  | 1,247972  | 1,155469  | 0         | 5,670051  | 5,069063  | 37,90499  |
| 0,707771  | 0,555957  | 1,45062   | 1,119506  | 2,004649  | 1,914948  | 1,528229  | 1,51793   | 1,06232   | 1,234051  | 1,139893  | 0         | 0         | 5,069063  | 37,90499  |
| 0,646008  | 0,553119  | 1,432852  | 1,053249  | 1,950751  | 1,911776  | 1,523171  | 1,367488  | 0,975679  | 1,191336  | 1,082239  | 0         | 0         | 5,069063  | 28,42874  |
| 0,55407   | 0,340937  | 1,565678  | 1,022277  | 1,917058  | 1,692217  | 1,585542  | 1,522727  | 0,929157  | 1,329761  | 1,156839  | 0         | 0         | 5,069063  | 30,69199  |
| 0,554063  | 0,336761  | 1,49516   | 0,989866  | 1,916725  | 1,653288  | 1,523028  | 1,45269   | 0,880276  | 1,378321  | 1,15948   | 0         | 0         | 5,069063  | 26,60157  |
| 0,762369  | 0,707746  | 1,502451  | 1,293555  | 2,002328  | 1,914799  | 1,523765  | 1,486693  | 0,991198  | 1,231775  | 1,14676   | 0,012763  | 8,825204  | 5,069063  | 37,90499  |
| 0,696626  | 0,553362  | 1,434721  | 1,078801  | 1,982356  | 1,914101  | 1,523253  | 1,396823  | 0,98856   | 1,190659  | 1,079923  | 0         | 0         | 5,069063  | 37,90499  |
| 0,707745  | 0,55381   | 1,433946  | 1,046262  | 1,959963  | 1,912849  | 1,523212  | 1,385385  | 0,977504  | 1,191313  | 1,081981  | 0         | 0         | 5,069063  | 37,90499  |
| 0,681578  | 0,553259  | 1,434721  | 1,060902  | 1,964255  | 1,913347  | 1,523251  | 1,396818  | 0,98216   | 1,190666  | 1,080255  | 0         | 0         | 5,069063  | 37,90499  |
| 0,764572  | 0,642086  | 1,582487  | 1,128536  | 1,980845  | 1,93669   | 1,640543  | 1,398837  | 1,06232   | 1,330481  | 1,099816  | 0         | 0         | 7,603595  | 47,38124  |
| 0,973574  | 0,687272  | 1,585211  | 1,280232  | 1,987808  | 1,937134  | 1,641104  | 1,545205  | 1,18859   | 1,332299  | 1,188765  | 0,217552  | 10,88306  | 7,603595  | 37,90499  |
| 0,649494  | 0,638371  | 1,58178   | 1,127787  | 1,953388  | 1,932132  | 1,640262  | 1,371016  | 1,011209  | 1,330602  | 1,102407  | 0         | 0         | 7,603595  | 28,42874  |
| 0,669248  | 0,641106  | 1,581999  | 1,127778  | 1,961557  | 1,934603  | 1,640331  | 1,374968  | 1,06232   | 1,33071   | 1,105265  | 0         | 0         | 7,603595  | 37,90499  |
| 0,969326  | 0,646417  | 1,586362  | 1,18979   | 2,002211  | 1,937611  | 1,641279  | 1,508701  | 1,160891  | 1,338074  | 1,229394  | 0,108678  | 8,825204  | 7,603595  | 37,90499  |
| 0,94336   | 0,761381  | 1,584651  | 1,293815  | 2,002367  | 1,937592  | 1,640999  | 1,486707  | 1,192403  | 1,334394  | 1,199948  | 0,019002  | 8,825204  | 7,603595  | 37,90499  |
| 0,96905   | 0,947814  | 1,639363  | 1,362838  | 2,126753  | 1,938583  | 1,645192  | 1,617151  | 1,201544  | 1,467061  | 1,327426  | 0,075609  | 0         | 7,603595  | 66,33373  |
| 0,842976  | 0,642332  | 1,583609  | 1,140685  | 2,004702  | 1,937681  | 1,641421  | 1,521836  | 1,165725  | 1,335155  | 1,197307  | 0         | 0         | 7,603595  | 37,90499  |
| 0,665521  | 0,640918  | 1,581927  | 1,127668  | 1,954794  | 1,932679  | 1,640253  | 1,366766  | 1,06232   | 1,330916  | 1,110023  | 0         | 0         | 7,603595  | 37,90499  |
| 0,680763  | 0,641459  | 1,582058  | 1,12787   | 1,966212  | 1,935374  | 1,640382  | 1,380513  | 1,06232   | 1,330557  | 1,101651  | 0         | 0         | 7,603595  | 37,90499  |
| 0,971448  | 0,667027  | 1,581781  | 1,296301  | 1,959299  | 1,934183  | 1,640363  | 1,521614  | 1,19224   | 1,329734  | 1,142539  | 0,129405  | 0         | 14,25383  | 28,42874  |

| P_VSA_Loξ | P_VSA_Loξ | P_VSA_Loξ | P_VSA_MFP | P_VSA_MFP | P_VSA_MFP | P_VSA_MFP | P_VSA_m_ | P_VSA_v_ξ | P_VSA_e_ξ | P_VSA_i_1 | P_VSA_i_2 | P_VSA_i_3 | P_VSA_s_ξ | P_VSA_s_4 |
|-----------|-----------|-----------|-----------|-----------|-----------|-----------|----------|-----------|-----------|-----------|-----------|-----------|-----------|-----------|
| 0         | 105,9399  | 0         | 60,02397  | 10,08906  | 50,56681  | 0         | 105,2221 | 68,83995  | 68,83995  | 0         | 68,83995  | 165,9639  | 21,45871  | 47,38124  |
| 0         | 129,4821  | 0         | 60,02397  | 18,91426  | 44,27614  | 0         | 107,7566 | 71,37448  | 71,37448  | 0         | 71,37448  | 189,5061  | 24,64429  | 46,73019  |
| 0         | 94,16882  | 45,95409  | 60,02397  | 10,08906  | 44,14567  | 45,95409  | 98,80093 | 108,3729  | 62,41881  | 0         | 108,3729  | 154,1928  | 24,51382  | 37,90499  |
| 0         | 129,4821  | 0         | 71,02386  | 10,08906  | 57,21705  | 0         | 111,8723 | 75,49019  | 75,49019  | 0         | 75,49019  | 200,506   | 26,70214  | 48,78805  |
| 0         | 94,16882  | 39,14864  | 60,02397  | 10,08906  | 44,59117  | 0         | 99,24643 | 102,013   | 62,86431  | 0         | 62,86431  | 193,3414  | 24,95932  | 37,90499  |
| 0         | 129,4821  | 0         | 71,02386  | 10,08906  | 57,21705  | 0         | 111,8723 | 75,49019  | 75,49019  | 0         | 75,49019  | 200,506   | 26,70214  | 48,78805  |
| 14,96011  | 94,16882  | 0         | 60,02397  | 10,08906  | 50,21158  | 0         | 104,8668 | 68,48472  | 68,48472  | 0         | 68,48472  | 154,1928  | 30,57973  | 37,90499  |
| 0         | 129,4821  | 0         | 60,02397  | 18,91426  | 44,27614  | 0         | 107,7566 | 71,37448  | 71,37448  | 0         | 71,37448  | 189,5061  | 24,64429  | 46,73019  |
| 23,5422   | 82,39771  | 0         | 82,02375  | 16,7393   | 42,10117  | 0         | 103,4067 | 67,02455  | 67,02455  | 0         | 67,02455  | 187,9637  | 38,5958   | 28,42874  |
| 0         | 94,16882  | 50,74691  | 60,02397  | 10,08906  | 43,84731  | 0         | 104,1726 | 62,12045  | 62,12045  | 0         | 62,12045  | 204,9397  | 24,21546  | 43,57504  |
| 0         | 94,16882  | 50,74691  | 60,02397  | 10,08906  | 43,84731  | 0         | 104,1726 | 62,12045  | 62,12045  | 0         | 62,12045  | 204,9397  | 24,21546  | 43,57504  |
| 0         | 94,16882  | 7,759516  | 104,9043  | 17,84857  | 44,27614  | 0         | 106,6909 | 70,30879  | 70,30879  | 0         | 70,30879  | 154,1928  | 24,64429  | 37,90499  |
| 0         | 82,39771  | 78,29729  | 60,02397  | 10,08906  | 38,61553  | 0         | 93,27079 | 135,186   | 56,88867  | 0         | 56,88867  | 220,719   | 28,45992  | 28,42874  |
| 17,21992  | 70,62661  | 0         | 69,53132  | 10,08906  | 36,14081  | 0         | 90,79607 | 54,41395  | 54,41395  | 0         | 54,41395  | 151,929   | 23,72196  | 30,69199  |
| 13,1295   | 101,9043  | 0         | 60,02397  | 10,08906  | 27,95997  | 31,27769  | 82,61523 | 77,51079  | 77,51079  | 31,27769  | 46,23311  | 142,4217  | 50,90922  | 26,60157  |
| 0         | 129,4821  | 0         | 60,02397  | 18,91426  | 44,27614  | 0         | 107,7566 | 71,37448  | 71,37448  | 0         | 71,37448  | 189,5061  | 24,64429  | 46,73019  |
| 14,96011  | 94,16882  | 0         | 60,02397  | 10,08906  | 50,21158  | 0         | 104,8668 | 68,48472  | 68,48472  | 0         | 68,48472  | 154,1928  | 30,57973  | 37,90499  |
| 0         | 94,16882  | 45,95409  | 60,02397  | 10,08906  | 44,14567  | 45,95409  | 98,80093 | 108,3729  | 62,41881  | 0         | 108,3729  | 154,1928  | 24,51382  | 37,90499  |
| 0         | 94,16882  | 39,14864  | 60,02397  | 10,08906  | 44,59117  | 0         | 99,24643 | 102,013   | 62,86431  | 0         | 62,86431  | 193,3414  | 24,95932  | 37,90499  |
| 0         | 129,4821  | 0         | 60,02397  | 12,62359  | 50,56681  | 0         | 107,7566 | 71,37448  | 71,37448  | 0         | 71,37448  | 189,5061  | 23,99324  | 47,38124  |
| 0         | 153,0243  | 0         | 71,02386  | 12,62359  | 57,21705  | 0         | 114,4068 | 78,02472  | 78,02472  | 0         | 78,02472  | 224,0482  | 29,23667  | 48,78805  |
| 0         | 105,9399  | 78,29729  | 60,02397  | 12,62359  | 38,61553  | 0         | 95,80532 | 137,7205  | 59,4232   | 0         | 59,4232   | 244,2612  | 30,99446  | 28,42874  |
| 0         | 117,711   | 45,95409  | 60,02397  | 12,62359  | 44,14567  | 45,95409  | 101,3355 | 110,9074  | 64,95334  | 0         | 110,9074  | 177,735   | 27,04835  | 37,90499  |
| 0         | 153,0243  | 0         | 60,02397  | 21,44879  | 44,27614  | 0         | 110,2911 | 73,90901  | 73,90901  | 0         | 73,90901  | 213,0483  | 27,17882  | 46,73019  |
| 0         | 153,0243  | 0         | 60,02397  | 21,44879  | 44,27614  | 0         | 110,2911 | 73,90901  | 73,90901  | 0         | 73,90901  | 213,0483  | 27,17882  | 46,73019  |
| 0         | 153,0243  | 0         | 60,02397  | 12,62359  | 74,66524  | 0         | 131,855  | 95,4729   | 95,4729   | 0         | 95,4729   | 213,0483  | 29,13917  | 66,33373  |
| 0         | 117,711   | 7,759516  | 104,9043  | 20,3831   | 44,27614  | 0         | 109,2254 | 72,84332  | 72,84332  | 0         | 72,84332  | 177,735   | 27,17882  | 37,90499  |
| 0         | 174,493   | 0         | 60,02397  | 12,62359  | 42,75021  | 56,78201  | 99,94    | 63,55788  | 120,3399  | 56,78201  | 63,55788  | 177,735   | 25,65289  | 94,687    |
| 0         | 117,711   | 39,14864  | 60,02397  | 12,62359  | 44,59117  | 0         | 101,781  | 104,5475  | 65,39884  | 0         | 65,39884  | 216,8836  | 27,49385  | 37,90499  |
| 23,5422   | 105,9399  | 0         | 82,02375  | 19,27383  | 42,10117  | 0         | 105,9412 | 69,55908  | 69,55908  | 0         | 69,55908  | 211,5059  | 41,13034  | 28,42874  |



| P_VSA_s  | ε        | P_VSA_pp | P_VSA_pp | P_VSA_pp | Eta_betaS | Eta_betaP | Eta_L    | Eta_L_A  | Eta_F_A  | Eta_FL   | Eta_sh_p | Eta_sh_y | SpMAD_E/ | SpMaxA_E | SpMAD_E/ |
|----------|----------|----------|----------|----------|-----------|-----------|----------|----------|----------|----------|----------|----------|----------|----------|----------|
| 96,4061  | 55,63588 | 104,031  | 50,28985 | 0,640625 | 0,8125    | 3,010542  | 0,188159 | 0,865604 | 4,743478 | 0,091324 | 0,273973 | 1,462282 | 0,542492 | 2,068228 |          |
| 96,4061  | 58,17041 | 97,7403  | 59,11506 | 0,632353 | 0,764706  | 3,36378   | 0,197869 | 0,858062 | 4,784087 | 0,149573 | 0,320513 | 1,468734 | 0,513133 | 2,050025 |          |
| 96,4061  | 92,11372 | 97,60983 | 96,24395 | 0,632353 | 0,764706  | 3,603029  | 0,211943 | 0,793918 | 4,544838 | 0,23166  | 0,289575 | 1,468734 | 0,513133 | 2,050025 |          |
| 107,406  | 46,15963 | 99,79815 | 61,17291 | 0,652778 | 0,75      | 3,457756  | 0,192098 | 0,901488 | 5,228116 | 0,143443 | 0,307377 | 1,457814 | 0,486383 | 2,008927 |          |
| 135,5547 | 85,30827 | 98,05533 | 89,4385  | 0,647059 | 0,764706  | 3,331699  | 0,195982 | 0,862757 | 4,816168 | 0,172311 | 0,311943 | 1,468734 | 0,513133 | 2,050025 |          |
| 107,406  | 46,15963 | 99,79815 | 61,17291 | 0,652778 | 0,75      | 3,457756  | 0,192098 | 0,906826 | 5,228116 | 0,143443 | 0,307377 | 1,45784  | 0,491179 | 2,008828 |          |
| 111,3662 | 46,15963 | 103,6757 | 65,24997 | 0,647059 | 0,764706  | 3,200726  | 0,188278 | 0,898834 | 4,947141 | 0,125549 | 0,329567 | 1,468734 | 0,513133 | 2,050025 |          |
| 96,4061  | 58,17041 | 97,7403  | 59,11506 | 0,632353 | 0,764706  | 3,364697  | 0,197923 | 0,862191 | 4,800007 | 0,149573 | 0,320513 | 1,468009 | 0,556104 | 2,049615 |          |
| 118,4059 | 36,68338 | 95,56533 | 50,28985 | 0,697368 | 0,736842  | 3,711565  | 0,195346 | 0,908654 | 5,508782 | 0,07874  | 0,354331 | 1,501279 | 0,458789 | 2,010007 |          |
| 147,153  | 46,15963 | 97,31147 | 101,0368 | 0,657895 | 0,842105  | 3,288627  | 0,173086 | 1,010136 | 5,769924 | 0,159363 | 0,346614 | 1,487552 | 0,462973 | 2,132983 |          |
| 147,153  | 46,15963 | 97,31147 | 101,0368 | 0,657895 | 0,842105  | 3,288627  | 0,173086 | 1,020666 | 5,769924 | 0,159363 | 0,346614 | 1,489458 | 0,470667 | 2,13549  |          |
| 141,2864 | 49,3452  | 97,7403  | 95,17019 | 0,65     | 0,65      | 3,936522  | 0,196826 | 0,983171 | 5,42267  | 0,176018 | 0,288779 | 1,514095 | 0,555173 | 2,013228 |          |
| 174,7034 | 114,9807 | 92,07969 | 128,5871 | 0,652778 | 0,722222  | 3,654714  | 0,20304  | 0,858975 | 4,903836 | 0,240044 | 0,343699 | 1,478199 | 0,494453 | 2,039362 |          |
| 105,9134 | 24,02156 | 99,11232 | 50,28985 | 0,683333 | 0,733333  | 2,863636  | 0,190909 | 0,831205 | 4,390384 | 0,100503 | 0,301508 | 1,466895 | 0,576795 | 2,066494 |          |
| 96,4061  | 55,29925 | 112,7018 | 50,28985 | 0,65     | 0,733333  | 3,240616  | 0,216041 | 0,761814 | 4,013404 | 0,093458 | 0,280374 | 1,466895 | 0,576795 | 2,066494 |          |
| 96,4061  | 58,17041 | 97,7403  | 59,11506 | 0,632353 | 0,764706  | 3,36378   | 0,197869 | 0,859855 | 4,784087 | 0,149573 | 0,320513 | 1,473228 | 0,517093 | 2,055315 |          |
| 111,3662 | 46,15963 | 103,6757 | 65,24997 | 0,647059 | 0,764706  | 3,202031  | 0,188355 | 0,908128 | 4,962673 | 0,125549 | 0,329567 | 1,468009 | 0,556104 | 2,049615 |          |
| 96,4061  | 92,11372 | 97,60983 | 96,24395 | 0,632353 | 0,764706  | 3,603029  | 0,211943 | 0,79235  | 4,544838 | 0,23166  | 0,289575 | 1,473228 | 0,517093 | 2,055315 |          |
| 135,5547 | 85,30827 | 98,05533 | 89,4385  | 0,647059 | 0,764706  | 3,333005  | 0,196059 | 0,867443 | 4,831699 | 0,172311 | 0,311943 | 1,468009 | 0,556104 | 2,049615 |          |
| 96,4061  | 58,17041 | 104,031  | 50,28985 | 0,632353 | 0,764706  | 3,510542  | 0,206502 | 0,835058 | 4,743478 | 0,08547  | 0,25641  | 1,446824 | 0,512328 | 2,018186 |          |
| 107,406  | 48,69416 | 99,79815 | 61,17291 | 0,644737 | 0,710526  | 3,957756  | 0,208303 | 0,872626 | 5,228116 | 0,135135 | 0,289575 | 1,444156 | 0,462041 | 1,966905 |          |
| 174,7034 | 117,5152 | 92,07969 | 128,5871 | 0,644737 | 0,684211  | 4,154714  | 0,218669 | 0,830362 | 4,903836 | 0,227038 | 0,325077 | 1,464175 | 0,469715 | 1,996613 |          |
| 96,4061  | 94,64825 | 97,60983 | 96,24395 | 0,625    | 0,722222  | 4,103029  | 0,227946 | 0,765947 | 4,544838 | 0,218978 | 0,273723 | 1,453363 | 0,486103 | 2,003142 |          |
| 96,4061  | 60,70494 | 97,7403  | 59,11506 | 0,625    | 0,722222  | 3,86378   | 0,214654 | 0,828707 | 4,784087 | 0,140562 | 0,301205 | 1,453363 | 0,486103 | 2,003142 |          |
| 96,4061  | 60,70494 | 97,7403  | 59,11506 | 0,625    | 0,722222  | 3,86378   | 0,214654 | 0,830251 | 4,784087 | 0,140562 | 0,301205 | 1,458008 | 0,489857 | 2,008586 |          |
| 96,4061  | 82,26883 | 128,1294 | 50,28985 | 0,630952 | 0,809524  | 4,27153   | 0,203406 | 0,933339 | 5,965654 | 0,068027 | 0,306122 | 1,476253 | 0,471986 | 2,095805 |          |
| 141,2864 | 51,87974 | 97,7403  | 95,17019 | 0,642857 | 0,619048  | 4,436522  | 0,211263 | 0,954254 | 5,42267  | 0,166407 | 0,273011 | 1,498945 | 0,529938 | 1,974618 |          |
| 96,4061  | 105,4762 | 96,21437 | 107,0719 | 0,625    | 0,722222  | 4,170934  | 0,231719 | 0,748134 | 4,476933 | 0,244579 | 0,26475  | 1,453363 | 0,486103 | 2,003142 |          |
| 135,5547 | 87,8428  | 98,05533 | 89,4385  | 0,638889 | 0,722222  | 3,831699  | 0,212872 | 0,833274 | 4,816168 | 0,162192 | 0,293624 | 1,453363 | 0,486103 | 2,003142 |          |
| 118,4059 | 39,21791 | 95,56533 | 50,28985 | 0,6875   | 0,7       | 4,211565  | 0,210578 | 0,88114  | 5,508782 | 0,074349 | 0,334572 | 1,486985 | 0,437929 | 1,971869 |          |

| SpMAD_E  | SpDiam_AI | SpMAD_Af | SpMax_AE | SpMAD_Af | Chi1_EA(d) | SM07_EA(i) | SM14_AEA | SM15_AEA | SM05_AEA | SM13_AEA | SM07_AEA | SM08_AEA | Eig12_EA(t) | Eig03_EA(r) |
|----------|-----------|----------|----------|----------|------------|------------|----------|----------|----------|----------|----------|----------|-------------|-------------|
| 1,434247 | 5,982913  | 1,483114 | 4,293305 | 1,555604 | 2,70681    | 7,46509    | 1        | 0,686489 | -1       | 4,147575 | -2,46237 | -3,80353 | -1,85138    | 2,117209    |
| 1,442332 | 5,599554  | 1,508452 | 4,306604 | 1,564619 | 4,177398   | 7,647792   | 1        | 0,718439 | -1       | 5,064127 | -3       | -3,01413 | -1,5        | 2,230756    |
| 1,387842 | 5,599554  | 1,508452 | 4,306604 | 1,564041 | 3,382486   | 7,49905    | 1        | 0,718439 | -1       | 5,064127 | -3       | -3,01413 | -1,5        | 2,128937    |
| 1,406733 | 5,737669  | 1,502381 | 4,30906  | 1,550501 | 7,357973   | 7,618995   | 1        | 0,742979 | -0,88311 | 5,074485 | -2,42573 | -3       | -1,5        | 2,213699    |
| 1,397016 | 5,599554  | 1,508452 | 4,306604 | 1,564869 | 3,347836   | 7,514035   | 1        | 0,718439 | -1       | 5,064127 | -3       | -3,01413 | -1,5        | 2,135377    |
| 1,406744 | 5,797063  | 1,498219 | 4,322952 | 1,553411 | 7,357973   | 7,629934   | 1,097838 | 0,690535 | -0,80486 | 5,06037  | -2,10752 | -2,54253 | -1,1754     | 2,189742    |
| 1,421316 | 5,599554  | 1,508452 | 4,306604 | 1,564332 | 3,369062   | 7,571279   | 1        | 0,718439 | -1       | 5,064127 | -3       | -3,01413 | -1,5        | 2,170275    |
| 1,441645 | 6,148719  | 1,518224 | 4,391291 | 1,565096 | 4,177398   | 7,810253   | 1,112256 | 0,701231 | -0,91601 | 4,882458 | -2,49182 | -3,45902 | -1,84024    | 2,158373    |
| 1,447285 | 5,814358  | 1,512449 | 4,387978 | 1,589796 | 10,54709   | 7,894108   | 1,402788 | 1,048215 | -0,63356 | 5,081714 | -2       | -2,47119 | -1,0936     | 2,303385    |
| 1,454104 | 5,609753  | 1,530084 | 4,344097 | 1,594827 | 7,850113   | 7,840441   | 1,095047 | 1        | -0,88232 | 5,085267 | -2       | -2,43992 | -1,5        | 2,333044    |
| 1,455948 | 5,782959  | 1,529312 | 4,373096 | 1,598724 | 7,850113   | 7,850308   | 1,1184   | 1        | -0,79216 | 5,079187 | -2       | -2,24577 | -1,19712    | 2,304992    |
| 1,426268 | 6,525474  | 1,522254 | 4,455905 | 1,529392 | 6,860517   | 8,067454   | 1,225341 | 1        | -0,88206 | 5,177422 | -2,44365 | -3       | -1          | 2,357855    |
| 1,367791 | 5,605967  | 1,530048 | 4,359662 | 1,59764  | 3,613357   | 7,584885   | 1,327499 | 0,720237 | -0,86841 | 5,072959 | -2,40092 | -3,14939 | -1,43774    | 2,168251    |
| 1,437148 | 5,780701  | 1,479257 | 4,300361 | 1,541187 | 2,70681    | 7,512078   | 0,618034 | 0,618034 | -1,15124 | 4,16124  | -3,86037 | -4,37228 | -2          | 2,119031    |
| 1,3812   | 5,780701  | 1,479257 | 4,300361 | 1,541187 | 2,70681    | 7,262153   | 0,618034 | 0,618034 | -1,15124 | 4,16124  | -3,86037 | -4,37228 | -2          | 2,080516    |
| 1,446745 | 5,754457  | 1,507928 | 4,318541 | 1,570406 | 4,177398   | 7,661063   | 1,09463  | 0,689083 | -0,91241 | 5,04203  | -2,52765 | -3,38956 | -1,76802    | 2,200906    |
| 1,420869 | 6,148719  | 1,518224 | 4,391291 | 1,566737 | 3,369062   | 7,689709   | 1,112256 | 0,701231 | -0,91601 | 4,882458 | -2,49182 | -3,45902 | -1,84024    | 2,146652    |
| 1,390358 | 5,754457  | 1,507928 | 4,318541 | 1,56999  | 3,382486   | 7,503689   | 1,09463  | 0,689083 | -0,91241 | 5,04203  | -2,52765 | -3,38956 | -1,76802    | 2,129205    |
| 1,396822 | 6,148719  | 1,518224 | 4,391291 | 1,567374 | 3,347836   | 7,583091   | 1,112256 | 0,701231 | -0,91601 | 4,882458 | -2,49182 | -3,45902 | -1,84024    | 2,134129    |
| 1,420417 | 5,982803  | 1,471016 | 4,292356 | 1,532767 | 4,339518   | 7,46509    | 1        | 0,90178  | -1       | 4,21456  | -2,34683 | -3,04631 | -1,5        | 2,186672    |
| 1,395696 | 5,745258  | 1,493828 | 4,308289 | 1,532711 | 8,99068    | 7,618995   | 1        | 0,976298 | -0,52979 | 5,159897 | -2       | -3       | -1,32752    | 2,224718    |
| 1,359146 | 5,79686   | 1,517677 | 4,359272 | 1,58139  | 5,246065   | 7,584885   | 1,396535 | 0,959316 | -0,63237 | 5,159597 | -2       | -2,88336 | -1,28038    | 2,20705     |
| 1,37693  | 5,743928  | 1,496523 | 4,305804 | 1,543768 | 5,015193   | 7,49905    | 1        | 0,959112 | -1       | 5,157536 | -2,83854 | -3       | -1,49193    | 2,191689    |
| 1,428427 | 5,743928  | 1,496523 | 4,305804 | 1,542107 | 5,810106   | 7,647792   | 1        | 0,959112 | -1       | 5,157536 | -2,83854 | -3       | -1,49193    | 2,233259    |
| 1,432985 | 5,760717  | 1,49628  | 4,31784  | 1,547847 | 5,810106   | 7,661063   | 1,15278  | 0,90594  | -0,7276  | 5,152311 | -2,01437 | -3,07172 | -1,37981    | 2,220202    |
| 1,45564  | 6,38392   | 1,509155 | 4,570841 | 1,555354 | 4,339518   | 8,168983   | 1,503747 | 1,260012 | -0,19338 | 5,162618 | -1,09293 | -1,4781  | -0,61028    | 2,248153    |
| 1,415173 | 6,669953  | 1,515179 | 4,455868 | 1,517625 | 8,493224   | 8,067454   | 1,298205 | 1        | -0,47364 | 5,181782 | -2       | -3       | -1          | 2,329532    |
| 1,357266 | 5,743928  | 1,496523 | 4,305804 | 1,541988 | 5,114711   | 7,474698   | 1        | 0,959112 | -1       | 5,157536 | -2,83854 | -3       | -1,49193    | 2,188028    |
| 1,385587 | 5,743928  | 1,496523 | 4,305804 | 1,544784 | 4,980543   | 7,514035   | 1        | 0,959112 | -1       | 5,157536 | -2,83854 | -3       | -1,49193    | 2,194214    |
| 1,4355   | 5,863684  | 1,507884 | 4,387728 | 1,573865 | 12,1798    | 7,894108   | 1,455623 | 1,094674 | -0,20603 | 5,161357 | -1,78076 | -2       | -0,83902    | 2,279239    |

| Eig04_EA(r | Eig12_EA(r | Eig13_EA(r | Eig14_AEA | Eig03_AEA | Eig05_AEA | Eig06_AEA | Eig07_AEA | RGyr     | SPAN     | SPAM     | SPH      | PJ13     | L/Bw  | HOMA     |
|------------|------------|------------|-----------|-----------|-----------|-----------|-----------|----------|----------|----------|----------|----------|-------|----------|
| 1,664753   | -1         | -1,38942   | 1         | 2,515513  | 1,4       | 1,235727  | 1         | 3,160605 | 5,642359 | 0,475073 | 0,87799  | 0,853243 | 3,88  | 0,75366  |
| 2,038429   | -1         | -1,17097   | 1         | 2,629396  | 1,486384  | 1,4       | 1         | 3,391339 | 6,266586 | 0,473082 | 0,909601 | 0,78265  | 4,46  | 0,754685 |
| 1,814289   | -1         | -1         | 1         | 2,827305  | 1,528426  | 1,4       | 1         | 3,915985 | 6,229035 | 0,499161 | 0,912478 | 0,753873 | 8,22  | 0,761655 |
| 2,031499   | -1         | -1         | 1,125182  | 2,794993  | 1,567894  | 1,4       | 1,086198  | 3,597083 | 6,909282 | 0,48811  | 0,895959 | 0,892545 | 4,82  | 0,747688 |
| 1,862178   | -1         | -1         | 1         | 2,851411  | 1,532588  | 1,4       | 1         | 3,640873 | 5,426699 | 0,465906 | 0,893283 | 0,776233 | 5,54  | 0,757914 |
| 1,983626   | -0,89755   | -1         | 1,286551  | 2,78055   | 1,588303  | 1,4       | 1,19353   | 3,570434 | 6,703777 | 0,480796 | 0,863093 | 0,791194 | 6,28  | 0,745285 |
| 1,978727   | -1         | -1,06662   | 1         | 2,836515  | 1,52999   | 1,4       | 1         | 3,470552 | 5,510934 | 0,469508 | 0,78708  | 0,781776 | 5,42  | 0,761321 |
| 1,764338   | -1         | -1,38879   | 1,052675  | 2,682537  | 1,497023  | 1,4       | 1,221868  | 3,363792 | 5,837261 | 0,456589 | 0,845814 | 0,960307 | 6,9   | 0,624137 |
| 2,067345   | -0,8537    | -0,9243    | 1,557104  | 2,928877  | 1,992041  | 1,820233  | 1,412186  | 3,64726  | 6,213208 | 0,471063 | 0,894891 | 0,835814 | 6,14  | 0,677199 |
| 2,088213   | -1         | -1         | 1,31873   | 2,964373  | 2,028899  | 1,416091  | 1,4       | 3,949455 | 6,032364 | 0,472674 | 0,880342 | 0,83341  | 10,78 | 0,750679 |
| 2,076383   | -0,89858   | -1         | 1,374134  | 2,96464   | 1,989291  | 1,4       | 1,392933  | 3,562064 | 5,165169 | 0,437381 | 0,866041 | 0,617628 | 3,53  | 0,744356 |
| 2,099841   | -0,7       | -0,86218   | 2         | 2,966132  | 2,051513  | 1,420208  | 1,4       | 3,924732 | 6,061563 | 0,465279 | 0,904504 | 0,804832 | 6,61  | 0,752317 |
| 1,952923   | -0,95684   | -1         | 1,280614  | 2,920742  | 2,138231  | 1,502982  | 1,4       | 3,784767 | 5,856244 | 0,483994 | 0,828007 | 0,760622 | 6,64  | 0,756581 |
| 1,59265    | -1,47568   | -1,58191   | 0,874578  | 2,525148  | 1,4       | 1,092217  | 0,779831  | 3,088864 | 5,451598 | 0,497795 | 0,847155 | 0,696309 | 4,41  | 0,737526 |
| 1,526623   | -1,27346   | -1,4754    | 0,874578  | 2,525148  | 1,4       | 1,092217  | 0,779831  | 3,129832 | 5,23937  | 0,488009 | 0,82276  | 0,713538 | 4,44  | 0,769295 |
| 1,991564   | -1         | -1,29982   | 1,071057  | 2,644964  | 1,489082  | 1,4       | 1,164034  | 3,343448 | 6,046659 | 0,464706 | 0,843957 | 0,808019 | 4,78  | 0,756398 |
| 1,730641   | -1         | -1,27456   | 1,052675  | 2,759077  | 1,592079  | 1,4       | 1,225049  | 3,226858 | 5,604351 | 0,47347  | 0,767922 | 0,757898 | 4,78  | 0,73962  |
| 1,776473   | -1         | -1,08679   | 1,071057  | 2,805076  | 1,543921  | 1,4       | 1,173521  | 3,770148 | 5,949567 | 0,487835 | 0,839428 | 0,881018 | 9,19  | 0,761302 |
| 1,698807   | -1         | -1,13941   | 1,052675  | 2,764245  | 1,596871  | 1,4       | 1,225197  | 3,34566  | 5,671756 | 0,476309 | 0,828458 | 0,959333 | 4,73  | 0,69593  |
| 1,692371   | -1         | -1,12679   | 1,025573  | 2,525602  | 1,4       | 1,373807  | 1,082895  | 3,076063 | 5,666456 | 0,449859 | 0,783529 | 0,897316 | 3,5   | 0,756079 |
| 2,090078   | -1         | -1         | 1,278621  | 2,797579  | 1,60767   | 1,4       | 1,273915  | 3,499124 | 6,923652 | 0,46515  | 0,852609 | 0,940969 | 4,28  | 0,750191 |
| 1,990853   | -0,87821   | -1         | 1,281098  | 2,924805  | 2,1387    | 1,558261  | 1,4       | 3,815281 | 6,023665 | 0,463822 | 0,820729 | 0,755827 | 5,56  | 0,75345  |
| 1,837284   | -1         | -1         | 1,24151   | 2,83014   | 1,578994  | 1,4       | 1,234126  | 3,89754  | 6,069679 | 0,46559  | 0,790233 | 0,759238 | 9,17  | 0,755763 |
| 2,103189   | -1         | -1,06742   | 1,24151   | 2,634813  | 1,546164  | 1,4       | 1,215368  | 3,297606 | 6,254226 | 0,449165 | 0,845634 | 0,771854 | 3,88  | 0,753626 |
| 2,04325    | -1         | -1,12325   | 1,233531  | 2,651336  | 1,537737  | 1,4       | 1,282694  | 3,306079 | 6,089049 | 0,443194 | 0,80686  | 0,913848 | 4,41  | 0,751391 |
| 2,11212    | -0,43161   | -0,61803   | 2         | 2,772398  | 1,618034  | 1,591408  | 1,4       | 3,959288 | 6,331133 | 0,43152  | 0,926756 | 0,896357 | 7,04  | 0,678428 |
| 2,175992   | -0,7       | -0,7       | 2         | 2,969231  | 2,056497  | 1,494473  | 1,4       | 3,861374 | 6,032519 | 0,441132 | 0,8317   | 0,757486 | 6,72  | 0,750444 |
| 1,738676   | -1         | -1         | 1,24151   | 2,771013  | 1,571141  | 1,4       | 1,229604  | 4,04837  | 6,705926 | 0,489385 | 0,809263 | 0,719869 | 12,03 | 0,752734 |
| 1,886405   | -1         | -1         | 1,24151   | 2,854377  | 1,582285  | 1,4       | 1,236032  | 3,578517 | 5,502442 | 0,443301 | 0,791426 | 0,773382 | 5,6   | 0,759069 |
| 2,147311   | -0,64202   | -0,89895   | 1,557104  | 2,932736  | 1,99211   | 1,826407  | 1,48188   | 3,682861 | 6,266973 | 0,449623 | 0,785031 | 0,759928 | 4,65  | 0,680959 |

| CMBL  | HOMT     | DISPm    | QXXm     | DISPv    | QXXv     | DISPe    | QYYp     | DISPi    | QXXs     | WiA_G    | J_G      | VE1sign_G | VE3sign_G | VE1_RG   |
|-------|----------|----------|----------|----------|----------|----------|----------|----------|----------|----------|----------|-----------|-----------|----------|
| 1,479 | 9,043918 | 3,029649 | 42,62891 | 1,036704 | 35,20728 | 0,291038 | 164,1866 | 0,558114 | 162,2356 | 4,57715  | 2,158189 | 0,064733  | -2,97219  | 2,794194 |
| 1,478 | 9,056222 | 6,550633 | 46,43715 | 2,845569 | 38,66005 | 0,370771 | 216,5016 | 0,367486 | 178,0691 | 4,95872  | 2,207818 | 0,036246  | -4,03407  | 2,255056 |
| 1,477 | 9,139857 | 17,47797 | 53,51366 | 7,76943  | 36,97063 | 0,155781 | 213,3139 | 0,924133 | 165,523  | 4,620353 | 2,145971 | 0,106074  | -2,43597  | 2,782844 |
| 1,479 | 8,972256 | 4,725782 | 52,08914 | 3,322805 | 44,32616 | 0,227643 | 235,735  | 0,23078  | 197,1476 | 5,121847 | 2,204247 | 0,061755  | -3,50705  | 2,302102 |
| 1,478 | 9,094965 | 7,291234 | 47,10904 | 6,377616 | 36,62323 | 0,118103 | 195,0288 | 0,670928 | 167,64   | 4,61701  | 2,146089 | 0,096333  | -2,54056  | 2,783563 |
| 1,479 | 8,94342  | 5,275059 | 46,62927 | 3,210214 | 40,33038 | 0,261833 | 244,8157 | 0,234927 | 172,866  | 5,143675 | 2,202636 | 0,045841  | -3,88237  | 2,354097 |
| 1,477 | 9,135857 | 2,578622 | 46,14213 | 3,221476 | 37,10482 | 0,122496 | 168,1576 | 0,220794 | 177,1918 | 4,607643 | 2,147618 | 0,072487  | -2,84935  | 2,774768 |
| 1,498 | 7,489643 | 5,552699 | 42,76712 | 1,857347 | 42,19153 | 0,378111 | 200,943  | 0,526495 | 175,7461 | 4,817841 | 2,274681 | 0,058398  | -3,45409  | 2,259433 |
| 1,477 | 8,126391 | 0,423998 | 46,326   | 1,586159 | 37,61162 | 0,054597 | 231,2511 | 0,352687 | 169,2454 | 5,030542 | 1,7419   | 0,06208   | -3,37973  | 2,782676 |
| 1,478 | 9,008154 | 4,620741 | 40,49419 | 4,076228 | 33,06207 | 0,206038 | 228,36   | 0,035178 | 168,7868 | 5,046174 | 2,1125   | 0,05731   | -3,35278  | 2,778918 |
| 1,479 | 8,932274 | 2,873882 | 75,62778 | 2,664951 | 54,11497 | 0,204767 | 182,0117 | 0,293101 | 300,943  | 4,782274 | 2,213745 | 0,036838  | -3,87101  | 2,781055 |
| 1,478 | 9,027806 | 7,483266 | 56,04977 | 4,054049 | 41,31713 | 0,453656 | 212,6649 | 1,63458  | 224,3814 | 4,99446  | 2,196765 | 0,058354  | -3,45501  | 2,784836 |
| 1,478 | 9,078969 | 13,30336 | 63,54692 | 10,38212 | 42,60529 | 0,098556 | 221,0314 | 0,770242 | 190,8709 | 4,65661  | 2,13361  | 0,119449  | -2,30705  | 2,777458 |
| 1,465 | 8,112788 | 2,028634 | 37,97142 | 1,58892  | 28,91882 | 0,206925 | 135,0896 | 0,382255 | 142,8232 | 4,406372 | 2,011821 | 0,135021  | -1,91312  | 2,758407 |
| 1,66  | 8,46225  | 1,533326 | 44,10395 | 2,954972 | 31,64253 | 0,273982 | 151,4948 | 0,776327 | 148,8626 | 4,489792 | 1,974626 | 0,179402  | -1,64158  | 2,748288 |
| 1,477 | 9,076773 | 6,333332 | 46,4507  | 2,877483 | 41,77729 | 0,363604 | 207,817  | 0,406642 | 175,8869 | 4,887479 | 2,238863 | 0,003348  | -6,93046  | 2,236688 |
| 1,482 | 8,875438 | 2,224469 | 51,65385 | 1,214268 | 38,62369 | 0,254602 | 173,0177 | 0,469579 | 202,8723 | 4,62486  | 2,138159 | 0,059     | -3,07286  | 2,755638 |
| 1,477 | 9,135618 | 15,73118 | 76,66967 | 7,003424 | 41,67814 | 0,165068 | 206,0247 | 0,870005 | 174,91   | 4,623793 | 2,14338  | 0,094419  | -2,56236  | 2,780985 |
| 1,489 | 8,351159 | 5,909012 | 60,27072 | 4,387763 | 38,34511 | 0,326272 | 193,6561 | 0,654401 | 175,8872 | 4,759637 | 2,084715 | 0,064855  | -2,97014  | 2,770375 |
| 1,478 | 9,07295  | 0,542362 | 48,15018 | 3,072996 | 41,5047  | 0,162395 | 183,5348 | 0,539298 | 184,9825 | 4,557127 | 2,390856 | 0,189182  | -2,02474  | 3,124327 |
| 1,478 | 9,002293 | 1,563186 | 58,57785 | 1,885567 | 51,50825 | 0,08733  | 256,2973 | 0,241742 | 220,6263 | 5,105998 | 2,408587 | 0,193793  | -2,28052  | 2,309192 |
| 1,478 | 9,041399 | 16,30283 | 76,3837  | 12,61902 | 54,20817 | 0,243499 | 250,7564 | 0,735299 | 237,5508 | 4,737987 | 2,305784 | 0,214185  | -1,87379  | 3,120854 |
| 1,478 | 9,069154 | 19,47911 | 55,69508 | 9,480792 | 42,74433 | 0,07744  | 243,8403 | 0,888101 | 186,3312 | 4,626437 | 2,363514 | 0,225492  | -1,81123  | 3,12585  |
| 1,478 | 9,043507 | 3,349952 | 52,48688 | 0,856555 | 45,32883 | 0,231948 | 236,8977 | 0,369996 | 201,134  | 4,934118 | 2,423266 | 0,169689  | -2,38808  | 2,265653 |
| 1,479 | 9,016696 | 3,560231 | 50,95875 | 1,552252 | 47,18644 | 0,2435   | 235,8915 | 0,409744 | 195,1457 | 4,926761 | 2,425561 | 0,135227  | -2,6937   | 2,259477 |
| 1,501 | 11,53328 | 3,956617 | 56,06182 | 3,400629 | 60,65895 | 0,387377 | 326,5198 | 0,868611 | 204,7439 | 5,411528 | 1,910709 | 0,015778  | -6,12667  | 3,17275  |
| 1,478 | 9,005326 | 9,95796  | 60,99297 | 6,109532 | 47,52481 | 0,544822 | 236,0539 | 1,532999 | 243,8901 | 4,984043 | 2,404226 | 0,191127  | -2,2279   | 3,117767 |
| 1,479 | 9,032811 | 27,67244 | 65,08688 | 11,31942 | 44,73838 | 0,135554 | 298,1923 | 1,17755  | 192,5811 | 4,623743 | 2,366582 | 0,234598  | -1,76309  | 3,123676 |
| 1,477 | 9,108832 | 9,537467 | 51,90354 | 8,088909 | 42,92557 | 0,088652 | 218,7974 | 0,639696 | 189,2588 | 4,600696 | 2,373838 | 0,217534  | -1,85492  | 3,12338  |
| 1,477 | 8,171511 | 3,416941 | 68,06499 | 4,238498 | 56,06102 | 0,099129 | 264,5849 | 0,369744 | 244,6548 | 5,153381 | 1,84016  | 0,145627  | -2,59395  | 3,089162 |

| VE2_RG   | VE3_RG   | Chi_G/D  | J_G/D    | SpPosA_G/VE1_G/D | VE2_G/D  | VE1sign_G | VE3sign_G | TDB03u   | TDB06u   | TDB08u   | TDB10u   | TDB04m   | TDB10m   |          |
|----------|----------|----------|----------|------------------|----------|-----------|-----------|----------|----------|----------|----------|----------|----------|----------|
| 0,111768 | 1,115641 | 1,028919 | 8,917301 | 1,04217          | 4,322021 | 0,172881  | 0,077478  | -2,77706 | 3,1128   | 6,06088  | 7,291346 | 8,162667 | 2,07423  | 2,726277 |
| 0,080538 | 0,98884  | 1,025576 | 9,913904 | 1,041833         | 4,382281 | 0,15651   | 0,062981  | -3,36221 | 3,124911 | 6,104143 | 7,452281 | 9,1105   | 1,748767 | 2,057351 |
| 0,111314 | 1,111222 | 1,019857 | 8,838758 | 1,065038         | 2,303972 | 0,092159  | 0,063716  | -2,98938 | 3,16438  | 6,1094   | 7,277538 | 8,315111 | 2,921128 | 10,71524 |
| 0,079383 | 1,050161 | 1,037074 | 10,37074 | 1,036397         | 4,56651  | 0,157466  | 0,137348  | -2,50032 | 3,126436 | 5,966314 | 7,404706 | 8,922467 | 2,015759 | 3,41581  |
| 0,111343 | 1,111503 | 1,020857 | 8,847431 | 1,058952         | 4,369989 | 0,1748    | 0,061964  | -3,01965 | 3,15436  | 6,10464  | 7,292731 | 8,312889 | 2,432329 | 6,17145  |
| 0,081176 | 1,078291 | 1,022669 | 10,22669 | 1,043066         | 4,394607 | 0,151538  | 0,08013   | -3,179   | 3,126018 | 6,029568 | 7,580818 | 9,443333 | 2,121927 | 3,220099 |
| 0,110991 | 1,108067 | 1,023773 | 8,872696 | 1,045766         | 4,305721 | 0,172229  | 0,070578  | -2,87832 | 3,12978  | 6,0914   | 7,259654 | 8,442556 | 2,260034 | 4,641556 |
| 0,080694 | 0,991199 | 1,019253 | 9,852779 | 1,039924         | 4,610428 | 0,164658  | 0,077669  | -3,1073  | 3,134393 | 5,894471 | 7,627657 | 8,570933 | 1,915096 | 2,214562 |
| 0,099381 | 1,244496 | 1,046253 | 7,846896 | 1,055349         | 4,429056 | 0,158181  | 0,07726   | -3,11373 | 3,155636 | 6,186258 | 7,554323 | 9,308111 | 2,317161 | 4,449967 |
| 0,102923 | 1,198465 | 1,004152 | 9,372086 | 1,044476         | 4,701616 | 0,174134  | 0,052432  | -3,45709 | 3,142185 | 6,166926 | 7,817367 | 9,6068   | 2,344823 | 4,877482 |
| 0,103002 | 1,199366 | 1,02439  | 9,560973 | 1,04579          | 4,287231 | 0,158786  | 0,144348  | -2,26959 | 3,138796 | 6,105    | 7,329464 | 8,140267 | 2,454151 | 4,861824 |
| 0,099458 | 1,245439 | 1,017337 | 9,834254 | 1,060877         | 4,322006 | 0,154357  | 0,091883  | -2,90295 | 3,147357 | 6,114893 | 7,485125 | 9,173389 | 2,520066 | 4,962935 |
| 0,111098 | 1,109119 | 1,012814 | 8,777723 | 1,070696         | 3,048283 | 0,121931  | 0,092268  | -2,58737 | 3,19518  | 6,1426   | 7,328731 | 8,422444 | 3,114596 | 13,7804  |
| 0,125382 | 0,969448 | 1,021675 | 7,832838 | 1,041825         | 4,081592 | 0,185527  | 0,064607  | -2,61739 | 3,12935  | 6,1218   | 7,450842 | 8,4225   | 2,696555 | 0,94364  |
| 0,124922 | 0,965937 | 1,001117 | 7,675232 | 1,071199         | 3,462244 | 0,157375  | 0,009106  | -4,48948 | 3,189875 | 6,2219   | 7,611368 | 8,57575  | 3,21935  | 0,96081  |
| 0,079882 | 0,978895 | 1,022148 | 9,880765 | 1,039003         | 4,525754 | 0,161634  | 0,010511  | -5,53939 | 3,125179 | 6,071618 | 7,448621 | 8,7125   | 1,826821 | 2,713638 |
| 0,110226 | 1,100555 | 1,020573 | 8,844966 | 1,046997         | 4,38323  | 0,175329  | 0,032488  | -3,72068 | 3,131    | 6,11028  | 7,302192 | 8,513556 | 2,560838 | 2,941175 |
| 0,111239 | 1,110497 | 1,018985 | 8,831201 | 1,05997          | 3,266933 | 0,130677  | 0,08894   | -2,62726 | 3,16506  | 6,10532  | 7,338192 | 8,267111 | 3,682245 | 20,60848 |
| 0,110815 | 1,106346 | 1,002463 | 8,68801  | 1,051261         | 4,078077 | 0,163123  | 0,02447   | -4,02843 | 3,15774  | 6,15     | 7,752885 | 9,131222 | 3,012287 | 3,094584 |
| 0,111583 | 1,385318 | 1,076872 | 10,40976 | 1,044859         | 4,492581 | 0,160449  | 0,088896  | -2,94313 | 3,078661 | 5,558613 | 7,071333 | 7,0907   | 1,779067 | 2,332698 |
| 0,072162 | 1,163072 | 1,08051  | 11,88561 | 1,041811         | 4,87147  | 0,152233  | 0,090393  | -3,34037 | 3,092844 | 5,616805 | 7,173605 | 7,744615 | 1,798798 | 2,773556 |
| 0,111459 | 1,383966 | 1,04306  | 10,08291 | 1,069634         | 4,286773 | 0,153099  | 0,14544   | -2,34449 | 3,148305 | 5,891968 | 7,158933 | 7,63045  | 2,709048 | 5,506174 |
| 0,111638 | 1,385911 | 1,06468  | 10,2919  | 1,065215         | 4,534153 | 0,161934  | 0,100216  | -2,79738 | 3,122763 | 5,633645 | 7,131667 | 7,2721   | 2,479238 | 6,022172 |
| 0,073086 | 1,101099 | 1,07305  | 11,44586 | 1,047385         | 4,663323 | 0,15043   | 0,09784   | -3,1294  | 3,0916   | 5,636559 | 7,210222 | 7,937966 | 1,559607 | 2,009532 |
| 0,072886 | 1,097425 | 1,062195 | 11,33008 | 1,041498         | 4,738464 | 0,152854  | 0,043817  | -4,21092 | 3,092415 | 5,7182   | 7,317879 | 7,998586 | 1,618462 | 2,047513 |
| 0,093316 | 1,704882 | 1,04706  | 9,423538 | 1,063113         | 4,951396 | 0,145629  | 0,1533    | -2,76915 | 3,122197 | 5,942627 | 7,610171 | 9,146079 | 1,975253 | 3,338412 |
| 0,100573 | 1,530915 | 1,063423 | 11,34318 | 1,063155         | 4,801491 | 0,154887  | 0,045514  | -4,15974 | 3,111462 | 5,648353 | 7,271889 | 8,03631  | 2,224189 | 3,877987 |
| 0,11156  | 1,385065 | 1,064087 | 10,28617 | 1,072015         | 2,907612 | 0,103843  | 0,127196  | -2,50747 | 3,134136 | 5,653161 | 7,080333 | 7,2198   | 2,94924  | 8,218817 |
| 0,111549 | 1,38495  | 1,068067 | 10,32465 | 1,061795         | 4,520316 | 0,16144   | 0,08188   | -3,04311 | 3,114169 | 5,618774 | 7,089333 | 7,1682   | 2,077048 | 3,894236 |
| 0,09965  | 1,518506 | 1,067844 | 8,809717 | 1,049647         | 4,743598 | 0,153019  | 0,083179  | -3,34795 | 3,120953 | 6,030243 | 7,464    | 8,461034 | 2,090781 | 3,073182 |

| TDB03v   | TDB04v   | TDB05v   | TDB07v   | TDB03e   | TDB06e   | TDB08e   | TDB03p   | TDB04p   | TDB06p   | TDB08p   | TDB10p   | TDB03i   | TDB05i   | TDB06i   |
|----------|----------|----------|----------|----------|----------|----------|----------|----------|----------|----------|----------|----------|----------|----------|
| 1,415518 | 1,812554 | 2,480185 | 2,788206 | 3,258785 | 6,542134 | 7,153354 | 1,442158 | 1,753577 | 3,080193 | 2,844825 | 2,027539 | 3,918159 | 6,547482 | 7,465825 |
| 1,472086 | 1,656533 | 2,185347 | 2,836588 | 3,24792  | 6,53026  | 7,504064 | 1,524137 | 1,690143 | 3,190204 | 2,90768  | 2,692023 | 3,865286 | 6,603159 | 7,387028 |
| 1,628502 | 1,992855 | 2,678289 | 3,363813 | 3,370333 | 6,741799 | 7,216725 | 1,744407 | 2,032539 | 3,562011 | 3,330411 | 4,614712 | 3,936204 | 6,536385 | 7,431767 |
| 1,523915 | 1,843898 | 2,108364 | 3,064375 | 3,334953 | 6,338445 | 7,606611 | 1,509408 | 1,816585 | 2,720604 | 2,867003 | 3,231392 | 3,897094 | 6,298823 | 7,522875 |
| 1,581885 | 1,954599 | 2,638095 | 3,24833  | 3,38438  | 6,795378 | 7,26734  | 1,630207 | 1,927841 | 3,382671 | 3,151923 | 3,66138  | 3,955456 | 6,556855 | 7,497426 |
| 1,52361  | 1,875056 | 2,248008 | 2,701854 | 3,334659 | 6,463103 | 7,905172 | 1,509012 | 1,820401 | 2,82799  | 2,99419  | 2,73756  | 3,896758 | 6,28138  | 7,517982 |
| 1,486256 | 1,879248 | 2,563343 | 2,997562 | 3,400457 | 6,897348 | 7,327497 | 1,435747 | 1,749127 | 3,064186 | 2,831354 | 2,001989 | 4,033037 | 6,660322 | 7,743572 |
| 1,511937 | 1,782514 | 2,086074 | 3,124723 | 3,2582   | 6,262262 | 7,405841 | 1,556425 | 1,80594  | 2,764588 | 2,934442 | 1,904325 | 3,875437 | 6,5445   | 7,394076 |
| 1,604438 | 1,988208 | 2,399277 | 3,192733 | 3,416254 | 6,956312 | 7,967633 | 1,545206 | 1,878486 | 3,02726  | 3,059391 | 2,865054 | 3,920875 | 6,58542  | 7,735318 |
| 1,566811 | 1,895423 | 2,466295 | 3,310291 | 3,404091 | 6,88025  | 8,39523  | 1,494139 | 1,729069 | 3,207611 | 3,092701 | 2,771288 | 3,965788 | 6,662772 | 7,621143 |
| 1,564421 | 1,932314 | 2,680156 | 3,158544 | 3,40037  | 7,149534 | 7,598395 | 1,491301 | 1,739279 | 2,860103 | 3,034486 | 2,212381 | 3,961773 | 6,704432 | 7,920778 |
| 1,609844 | 1,883992 | 2,403868 | 3,248978 | 3,445453 | 6,887376 | 8,476432 | 1,511227 | 1,66117  | 3,151989 | 2,842682 | 2,521895 | 4,0092   | 7,085192 | 7,631464 |
| 1,795973 | 2,176145 | 2,917218 | 3,527623 | 3,520509 | 7,049832 | 7,625077 | 1,870525 | 2,173262 | 3,742769 | 3,672999 | 4,440716 | 3,990904 | 6,6064   | 7,515909 |
| 1,382443 | 2,006695 | 2,656632 | 2,866172 | 3,463075 | 6,887173 | 7,75757  | 1,313859 | 1,772345 | 2,879262 | 2,66184  | 1,45733  | 4,081127 | 6,677574 | 7,648933 |
| 1,499173 | 2,163662 | 2,810247 | 3,143213 | 3,440102 | 6,771609 | 7,683728 | 1,556891 | 2,056695 | 3,55852  | 3,085843 | 1,483846 | 4,030401 | 6,720508 | 7,46779  |
| 1,472481 | 1,708975 | 2,34413  | 2,756558 | 3,248285 | 6,497271 | 7,320679 | 1,524413 | 1,728565 | 2,781192 | 3,221794 | 2,321623 | 3,865601 | 6,490582 | 7,86212  |
| 1,506165 | 1,93572  | 2,618834 | 2,94534  | 3,406251 | 6,726008 | 7,503777 | 1,436154 | 1,749538 | 3,087534 | 2,858711 | 2,138127 | 4,031481 | 6,80818  | 7,60599  |
| 1,629544 | 2,095222 | 2,834543 | 3,143638 | 3,371151 | 6,743084 | 7,426943 | 1,745326 | 2,14691  | 3,657841 | 3,687412 | 3,297211 | 3,936959 | 6,540055 | 7,427069 |
| 1,62753  | 2,073143 | 2,747168 | 3,305063 | 3,391196 | 6,702637 | 7,893609 | 1,672476 | 2,034823 | 3,378133 | 3,48129  | 2,276383 | 3,957365 | 6,578222 | 7,534204 |
| 1,316512 | 1,640782 | 2,155955 | 2,708471 | 3,170014 | 6,038415 | 6,738616 | 1,378271 | 1,64969  | 2,757005 | 2,921944 | 2,188592 | 3,886659 | 6,199431 | 6,934708 |
| 1,420744 | 1,708733 | 1,943149 | 2,939535 | 3,242457 | 6,007757 | 7,189574 | 1,443278 | 1,730264 | 2,529212 | 2,909422 | 2,835639 | 3,870463 | 6,161265 | 7,139504 |
| 1,648397 | 1,985232 | 2,603595 | 3,402938 | 3,392044 | 6,761805 | 7,221854 | 1,748026 | 2,030414 | 3,393874 | 3,738692 | 3,764608 | 3,947645 | 6,540419 | 7,347944 |
| 1,497078 | 1,789852 | 2,320703 | 3,218797 | 3,264957 | 6,24053  | 6,870944 | 1,634598 | 1,880549 | 3,164995 | 3,381307 | 3,425132 | 3,902419 | 6,183003 | 6,952858 |
| 1,374873 | 1,541592 | 1,972628 | 2,756099 | 3,168296 | 6,077509 | 7,080923 | 1,454949 | 1,616343 | 2,871819 | 2,941921 | 2,536123 | 3,843219 | 6,32415  | 6,917028 |
| 1,374246 | 1,582445 | 2,106264 | 2,730414 | 3,16902  | 6,154835 | 7,013129 | 1,454766 | 1,646928 | 2,596218 | 3,300047 | 2,501423 | 3,84419  | 6,198815 | 7,439104 |
| 1,542739 | 1,94607  | 2,324594 | 3,207843 | 3,175348 | 6,334619 | 7,423923 | 1,621949 | 2,015429 | 2,784994 | 3,76867  | 3,491532 | 3,8163   | 6,229328 | 7,586785 |
| 1,493883 | 1,737826 | 2,15707  | 3,117731 | 3,338973 | 6,372412 | 7,979919 | 1,444196 | 1,591969 | 2,844349 | 2,904169 | 2,450067 | 3,96785  | 6,73224  | 7,120085 |
| 1,558892 | 1,842472 | 2,378875 | 3,367619 | 3,238235 | 6,18965  | 6,77318  | 1,895899 | 2,116355 | 3,55821  | 3,788829 | 4,572022 | 3,882002 | 6,181334 | 6,911397 |
| 1,458027 | 1,75959  | 2,288178 | 3,106725 | 3,276848 | 6,273163 | 6,857591 | 1,537936 | 1,79477  | 3,013655 | 3,199653 | 2,946008 | 3,918486 | 6,202633 | 6,99287  |
| 1,497491 | 1,85566  | 2,243285 | 3,162352 | 3,315729 | 6,80286  | 7,652516 | 1,479861 | 1,803208 | 2,875456 | 3,207879 | 2,784755 | 3,894456 | 6,565815 | 7,641155 |

| TDB07i   | TDB09i   | TDB10i   | TDB06s   | TDB08s   | TDB09s   | TDB10s   | TDB08r   | TDB10r   | RDF025u  | RDF030u  | RDF035u  | RDF040u  | RDF050u  | RDF065u  |
|----------|----------|----------|----------|----------|----------|----------|----------|----------|----------|----------|----------|----------|----------|----------|
| 8,177192 | 10,15604 | 11,25085 | 27,78123 | 23,94524 | 35,72914 | 51,29259 | 3,367938 | 3,417556 | 19,21991 | 6,091142 | 10,85769 | 10,73191 | 7,890061 | 6,600485 |
| 8,633942 | 10,05516 | 12,17368 | 27,04345 | 23,47936 | 33,79652 | 31,31507 | 3,483609 | 3,493119 | 19,86596 | 6,709942 | 12,47759 | 12,3257  | 8,673546 | 6,490043 |
| 8,12586  | 9,947789 | 10,86612 | 30,31008 | 24,26659 | 37,80781 | 53,85452 | 3,779238 | 5,716658 | 17,6254  | 9,098872 | 10,62741 | 9,726143 | 10,43405 | 6,782044 |
| 8,2816   | 10,47453 | 11,47762 | 24,66288 | 25,49104 | 34,97473 | 41,42868 | 3,663144 | 4,577263 | 19,41149 | 7,803788 | 11,30402 | 13,05289 | 10,1844  | 12,17448 |
| 8,195264 | 10,14094 | 11,25053 | 32,54904 | 25,12712 | 40,34778 | 59,39686 | 3,698641 | 5,242405 | 17,47355 | 6,843012 | 10,03194 | 11,31166 | 8,4867   | 6,770837 |
| 8,856827 | 10,55804 | 12,66353 | 25,69422 | 25,60906 | 33,5242  | 45,05528 | 3,74775  | 3,763856 | 20,09801 | 6,642139 | 10,29087 | 9,515891 | 7,808733 | 9,399239 |
| 8,409453 | 10,8235  | 12,80207 | 38,7483  | 27,9407  | 48,38427 | 75,82309 | 3,517223 | 4,205666 | 18,40361 | 4,047756 | 8,545331 | 5,943509 | 5,511337 | 9,897828 |
| 8,275918 | 10,743   | 12,06129 | 22,97861 | 21,72097 | 34,47739 | 56,51273 | 3,410643 | 3,410624 | 21,07052 | 6,379266 | 9,901278 | 9,356764 | 7,793169 | 8,696754 |
| 8,685017 | 10,51982 | 12,43524 | 30,93903 | 26,5158  | 36,4656  | 52,72137 | 3,924462 | 4,392463 | 17,54534 | 9,239393 | 12,53817 | 10,29398 | 6,749125 | 9,903761 |
| 8,903318 | 11,25805 | 13,4132  | 32,05196 | 43,17986 | 46,52255 | 68,13246 | 4,219063 | 5,139355 | 20,19245 | 6,368181 | 12,68467 | 4,989727 | 6,998211 | 9,025251 |
| 8,414286 | 10,65794 | 11,30585 | 43,43313 | 29,79538 | 44,33267 | 66,42255 | 3,930339 | 4,260348 | 22,48445 | 5,175528 | 9,097698 | 9,191479 | 9,288431 | 8,478019 |
| 9,300923 | 10,49767 | 14,22159 | 33,84615 | 51,62707 | 45,79806 | 71,0891  | 3,993804 | 4,547577 | 20,33469 | 8,230123 | 11,89014 | 10,21559 | 11,65471 | 9,26347  |
| 8,189294 | 10,13657 | 11,28005 | 37,03792 | 28,61175 | 43,87626 | 103,7371 | 4,286607 | 6,886731 | 16,54191 | 7,563392 | 8,806886 | 11,42877 | 5,824115 | 6,611309 |
| 8,349101 | 10,43138 | 12,30082 | 31,78443 | 36,81273 | 49,32849 | 58,9575  | 3,464393 | 2,983421 | 11,52066 | 4,247329 | 7,966228 | 2,923518 | 2,03815  | 8,410093 |
| 8,190023 | 10,62889 | 12,52464 | 30,089   | 29,20053 | 49,54324 | 60,03025 | 3,824879 | 3,037705 | 14,74718 | 2,510392 | 9,031652 | 5,897612 | 4,22132  | 5,802065 |
| 8,383483 | 10,74034 | 11,7503  | 25,18267 | 23,51286 | 27,80753 | 38,33046 | 3,709698 | 3,357539 | 19,78206 | 6,398231 | 12,04427 | 11,42512 | 5,470226 | 7,898623 |
| 8,4506   | 10,61324 | 11,71898 | 30,64518 | 29,28317 | 68,70293 | 55,13077 | 3,570485 | 3,634291 | 19,42368 | 3,369966 | 10,32235 | 4,184958 | 2,862637 | 6,144259 |
| 8,137074 | 9,986297 | 11,01691 | 30,30775 | 25,71375 | 36,84826 | 77,1285  | 4,119699 | 5,529623 | 17,32029 | 8,628943 | 9,963463 | 9,482624 | 6,234078 | 8,104998 |
| 8,418003 | 11,04764 | 12,5812  | 28,46552 | 28,2445  | 55,92383 | 58,086   | 4,114137 | 3,851696 | 18,5202  | 4,541685 | 8,859146 | 9,097349 | 6,987005 | 7,252798 |
| 7,867583 | 9,153308 | 9,397302 | 25,78088 | 15,87366 | 21,05878 | 32,22241 | 3,198256 | 3,012575 | 21,51689 | 7,966432 | 11,80123 | 11,44351 | 13,79322 | 4,640911 |
| 7,9661   | 9,564725 | 9,913145 | 23,75181 | 18,90088 | 23,24577 | 31,22684 | 3,480943 | 3,749427 | 21,3008  | 8,643727 | 15,37546 | 11,62077 | 16,24317 | 11,07401 |
| 7,991379 | 9,48826  | 9,930248 | 35,02283 | 20,49322 | 28,81437 | 41,95032 | 4,103298 | 4,792082 | 20,21611 | 5,998792 | 12,94593 | 14,8639  | 9,711163 | 4,204165 |
| 7,873574 | 9,140092 | 9,360486 | 28,0415  | 16,55745 | 23,25106 | 35,47351 | 3,603348 | 4,138955 | 18,80489 | 10,53084 | 14,47526 | 11,05898 | 16,06676 | 4,858579 |
| 8,302441 | 9,080656 | 10,43478 | 25,5122  | 16,73746 | 20,8901  | 26,31813 | 3,306123 | 3,162681 | 22,18526 | 8,650107 | 14,30156 | 13,34178 | 14,3464  | 6,568412 |
| 8,154496 | 10,00508 | 10,5719  | 24,18296 | 16,56285 | 19,60995 | 26,1513  | 3,574298 | 3,149849 | 21,72897 | 8,735595 | 17,63057 | 12,38941 | 14,24907 | 5,280589 |
| 8,490968 | 10,28446 | 11,6321  | 24,57043 | 18,96376 | 23,51719 | 34,51026 | 4,095386 | 4,324098 | 29,33051 | 11,76275 | 14,15603 | 13,09608 | 10,89089 | 7,816454 |
| 8,879693 | 9,493559 | 11,78377 | 31,08922 | 41,93955 | 30,08954 | 51,42519 | 3,783491 | 3,851754 | 23,12115 | 10,2978  | 11,92878 | 11,85192 | 19,51985 | 6,475861 |
| 7,808309 | 8,905121 | 9,072343 | 27,60807 | 16,2002  | 22,42904 | 34,33026 | 3,66666  | 4,358824 | 18,95885 | 11,90622 | 13,80647 | 12,13003 | 13,13487 | 5,77002  |
| 7,905537 | 9,16755  | 9,404741 | 29,81611 | 17,05824 | 24,63453 | 37,30646 | 3,500673 | 3,864235 | 19,22759 | 9,0747   | 13,55011 | 13,19967 | 14,14774 | 4,41897  |
| 8,531994 | 9,99867  | 11,14031 | 30,72169 | 19,99447 | 25,83949 | 32,27266 | 3,830447 | 3,903073 | 21,18753 | 7,57077  | 18,57594 | 5,732198 | 5,91374  | 12,02915 |

| RDF070u  | RDF075u  | RDF080u  | RDF085u  | RDF090u  | RDF095u  | RDF100u  | RDF105u  | RDF110u  | RDF120u  | RDF025m  | RDF030m  | RDF035m  | RDF045m  | RDF050m  |
|----------|----------|----------|----------|----------|----------|----------|----------|----------|----------|----------|----------|----------|----------|----------|
| 4,175675 | 6,186772 | 4,113838 | 3,921128 | 2,188689 | 2,349092 | 0,266469 | 0        | 0        | 0        | 13,83171 | 4,068866 | 5,721166 | 6,367768 | 3,641223 |
| 5,323044 | 6,229661 | 5,172928 | 3,833114 | 3,843575 | 3,582742 | 3,036055 | 2,616761 | 0,150495 | 0        | 15,93262 | 4,666055 | 5,953596 | 6,780448 | 3,674627 |
| 4,597799 | 4,874929 | 3,694332 | 3,107641 | 0,77614  | 1,967039 | 0,711203 | 0,102275 | 0,17052  | 0        | 13,86797 | 8,190272 | 4,930761 | 6,266278 | 4,516578 |
| 3,095865 | 10,67972 | 5,502555 | 8,837875 | 3,732716 | 5,137608 | 1,267155 | 2,93023  | 1,461691 | 0,413293 | 15,71562 | 4,568577 | 5,611982 | 7,748806 | 4,168374 |
| 3,939379 | 5,666364 | 5,809771 | 3,563124 | 0,675167 | 1,263051 | 1,013259 | 0,004683 | 0,00076  | 0        | 13,88554 | 4,169922 | 5,017714 | 8,98932  | 3,341478 |
| 3,977048 | 8,31262  | 3,617043 | 5,671932 | 5,141131 | 2,888177 | 4,857262 | 1,484458 | 2,696909 | 0        | 15,78837 | 3,591205 | 5,134676 | 9,21014  | 3,780532 |
| 5,09778  | 4,667719 | 2,885063 | 2,403212 | 2,454521 | 1,80517  | 1,719452 | 0        | 0        | 0        | 14,81397 | 2,004017 | 5,882474 | 8,022941 | 3,747143 |
| 6,486203 | 5,153721 | 7,169864 | 3,001577 | 2,018226 | 0,83403  | 1,075916 | 0,009017 | 0,000332 | 0        | 14,68158 | 4,750309 | 5,179576 | 7,100508 | 4,170127 |
| 6,100673 | 5,995698 | 3,475905 | 6,127417 | 4,107092 | 1,963941 | 2,49173  | 3,791389 | 1,347567 | 0,000352 | 15,38985 | 4,194466 | 8,58518  | 9,318403 | 3,988517 |
| 6,737985 | 3,964084 | 5,311224 | 5,52489  | 5,032216 | 2,40047  | 3,301177 | 2,103398 | 1,61987  | 0,428956 | 16,41494 | 4,115874 | 8,268714 | 8,597341 | 4,103732 |
| 6,655156 | 7,016806 | 4,272438 | 5,219107 | 0,374393 | 0,693488 | 0,007758 | 0        | 0        | 0        | 16,77714 | 3,65629  | 6,264095 | 3,603502 | 7,936618 |
| 3,866054 | 7,057319 | 3,843905 | 6,7178   | 2,553781 | 2,852938 | 4,608807 | 2,791195 | 0,663445 | 0        | 16,86484 | 5,837658 | 6,627559 | 8,491324 | 7,688678 |
| 5,309891 | 5,472736 | 4,130229 | 3,497884 | 2,016356 | 1,103546 | 1,749899 | 0,105448 | 0        | 0        | 13,92631 | 3,682712 | 5,310229 | 10,71701 | 3,638414 |
| 2,813359 | 3,460084 | 2,509498 | 0,985165 | 0,805337 | 0,353608 | 0        | 0        | 0        | 0        | 10,32294 | 2,806224 | 8,863242 | 6,371058 | 1,799752 |
| 2,678112 | 5,125843 | 1,33227  | 4,864416 | 1,232825 | 1,857053 | 0        | 0        | 0        | 0        | 14,97325 | 1,324457 | 7,328329 | 5,647693 | 3,336635 |
| 6,543775 | 8,768779 | 3,75981  | 8,886245 | 7,813638 | 3,108927 | 2,260632 | 1,133677 | 0        | 0        | 15,93392 | 4,552844 | 6,048414 | 6,90795  | 3,114511 |
| 5,289777 | 6,912102 | 4,118707 | 3,411936 | 1,8422   | 1,556889 | 0,611956 | 0        | 0        | 0        | 14,99361 | 1,391896 | 7,932359 | 9,20294  | 1,968918 |
| 4,895446 | 8,53108  | 2,083842 | 5,226909 | 3,64087  | 1,515065 | 1,351438 | 0,000103 | 0        | 0        | 13,8472  | 7,46883  | 5,628844 | 7,241874 | 3,694943 |
| 4,373905 | 3,774749 | 4,753127 | 5,315322 | 2,609374 | 1,825363 | 1,760817 | 0,021459 | 0        | 0        | 13,78834 | 4,672926 | 5,614332 | 9,826139 | 4,352489 |
| 4,256687 | 6,5293   | 4,822214 | 3,276956 | 1,618633 | 2,609728 | 0,117586 | 0        | 0        | 0        | 15,02422 | 4,893247 | 6,246694 | 2,752067 | 5,070652 |
| 6,978062 | 8,017526 | 5,906481 | 7,507168 | 4,570911 | 2,097377 | 4,899422 | 2,338002 | 3,221669 | 0,170559 | 17,04284 | 3,782797 | 10,1295  | 8,444172 | 4,551366 |
| 5,443983 | 5,58268  | 8,876322 | 1,284286 | 2,325004 | 2,529398 | 2,131738 | 1,294996 | 0        | 0        | 15,82946 | 3,96707  | 9,097653 | 11,3014  | 6,645255 |
| 7,628867 | 6,183854 | 5,058871 | 3,94858  | 3,877572 | 2,128866 | 1,011059 | 0,010446 | 0,455223 | 0        | 14,8502  | 8,9024   | 7,510846 | 2,350237 | 7,620557 |
| 6,998219 | 4,396187 | 7,302001 | 5,605255 | 1,861114 | 6,474301 | 3,414094 | 2,306258 | 1,596267 | 0        | 17,20889 | 5,393647 | 9,103557 | 3,978892 | 3,812608 |
| 6,473251 | 7,05904  | 4,720387 | 4,723526 | 6,288462 | 5,357274 | 4,80084  | 1,005284 | 0,153064 | 0        | 16,88038 | 4,611355 | 8,531265 | 3,10249  | 6,957711 |
| 7,568614 | 11,2359  | 11,51756 | 4,272244 | 5,002275 | 6,020324 | 6,434921 | 3,164837 | 2,401047 | 1,312012 | 19,84869 | 7,735133 | 3,712993 | 8,338629 | 8,145254 |
| 5,240206 | 6,509353 | 6,122175 | 6,828006 | 4,618874 | 5,658766 | 4,03437  | 3,590944 | 1,037865 | 0        | 18,22795 | 8,147089 | 9,214533 | 3,798688 | 8,863654 |
| 5,477887 | 3,720607 | 6,466123 | 5,705706 | 2,161765 | 0,194647 | 0,795644 | 1,006927 | 1,697276 | 0        | 14,84718 | 21,30086 | 8,581626 | 10,41202 | 9,395079 |
| 6,580669 | 5,378591 | 6,562377 | 5,483515 | 3,672226 | 1,113379 | 1,104358 | 0,21002  | 0,000266 | 0        | 14,93931 | 5,616266 | 8,160483 | 5,411787 | 5,808327 |
| 5,462465 | 5,536716 | 6,767851 | 5,379645 | 6,180863 | 2,84958  | 4,095301 | 3,143575 | 2,022656 | 0,000123 | 17,02703 | 1,178186 | 14,06793 | 7,831252 | 3,939365 |



| RDF055m  | RDF060m  | RDF065m  | RDF070m  | RDF075m  | RDF080m  | RDF085m  | RDF090m  | RDF095m  | RDF100m  | RDF105m  | RDF110m  | RDF115m  | RDF020v  | RDF040v  |
|----------|----------|----------|----------|----------|----------|----------|----------|----------|----------|----------|----------|----------|----------|----------|
| 5,582807 | 2,249086 | 2,085137 | 0,581794 | 1,531822 | 1,224694 | 1,753199 | 0,120875 | 0,137752 | 0,001885 | 0        | 0        | 0        | 1,2952   | 3,035649 |
| 3,760186 | 3,438765 | 2,794479 | 1,208353 | 1,188172 | 1,578172 | 1,902487 | 1,174033 | 0,434091 | 0,145669 | 0,183896 | 0,001064 | 0        | 1,401203 | 3,682872 |
| 3,743379 | 3,587129 | 3,625794 | 13,47614 | 1,422434 | 2,3699   | 1,451621 | 0,06701  | 5,187142 | 6,176109 | 0,057223 | 0,095406 | 0        | 1,810464 | 3,106783 |
| 4,485577 | 3,015182 | 8,08181  | 0,936325 | 3,580101 | 2,245892 | 3,79906  | 1,475236 | 1,418001 | 1,030441 | 0,064672 | 0,10758  | 0,001757 | 1,780973 | 3,741493 |
| 5,414787 | 4,558095 | 3,304178 | 2,874581 | 1,211882 | 8,58624  | 1,872613 | 0,146895 | 1,692105 | 3,898898 | 0,001162 | 0,000189 | 0        | 1,25762  | 4,76561  |
| 6,254338 | 4,193584 | 5,354158 | 1,693926 | 5,443939 | 1,294231 | 3,587396 | 0,44811  | 0,45309  | 1,363581 | 0,051544 | 0,57631  | 0,009741 | 1,778591 | 2,744201 |
| 5,424671 | 3,291741 | 7,628734 | 3,944049 | 1,612325 | 0,373299 | 1,007991 | 3,684695 | 0,11465  | 1,751051 | 0        | 0        | 0        | 1,237139 | 1,952663 |
| 2,850217 | 4,261759 | 5,30491  | 2,513032 | 0,926563 | 2,925929 | 1,161721 | 1,614411 | 0,072835 | 0,105172 | 0        | 0        | 0        | 1,374471 | 2,986709 |
| 7,38627  | 3,219563 | 6,97097  | 2,935832 | 3,369267 | 1,772267 | 4,795061 | 1,936219 | 1,546739 | 0,412312 | 1,239918 | 0,137203 | 0,022841 | 1,796804 | 3,259843 |
| 2,488988 | 0,796783 | 4,856062 | 4,273553 | 2,054022 | 2,34904  | 5,174106 | 1,160242 | 0,86152  | 2,376717 | 2,409087 | 0,671893 | 1,868232 | 1,265621 | 1,525733 |
| 7,82754  | 3,234563 | 6,748421 | 5,324271 | 4,26298  | 3,46839  | 3,50813  | 0,143252 | 0,056105 | 0,000961 | 0        | 0        | 0        | 1,276858 | 2,414842 |
| 4,543899 | 2,873635 | 7,008162 | 2,456748 | 3,833389 | 1,42214  | 7,2789   | 2,406784 | 2,279668 | 5,48505  | 0,329714 | 0,137754 | 0,016728 | 1,243576 | 3,136121 |
| 3,606099 | 4,849172 | 1,999543 | 3,979296 | 3,953122 | 9,617608 | 2,639149 | 2,151894 | 3,22158  | 6,025805 | 0,026176 | 0        | 0        | 1,195413 | 6,238257 |
| 8,56324  | 3,22367  | 3,539661 | 1,64015  | 0,464589 | 0,241393 | 0,099924 | 0,089936 | 0,012916 | 0        | 0        | 0        | 0        | 1,325122 | 0,974215 |
| 3,244492 | 4,401664 | 2,042824 | 1,606685 | 3,582974 | 0,111236 | 2,154704 | 0,00872  | 0,103608 | 0        | 0        | 0        | 0        | 1,097476 | 2,976065 |
| 3,658006 | 3,290266 | 2,102706 | 1,90477  | 3,584131 | 1,742499 | 3,22267  | 0,403557 | 0,136169 | 0,057721 | 0,113041 | 0        | 0        | 1,389474 | 3,535135 |
| 3,145719 | 1,310755 | 1,075808 | 5,156806 | 2,626574 | 1,052157 | 1,568992 | 0,540369 | 0,028911 | 0,067732 | 0        | 0        | 0        | 1,250781 | 1,235398 |
| 5,554324 | 2,467383 | 10,63043 | 8,412962 | 5,42674  | 0,972844 | 3,05958  | 5,934478 | 0,138063 | 0,460497 | 0,000913 | 0        | 0        | 1,816594 | 3,04401  |
| 2,466855 | 2,850897 | 8,582873 | 4,553351 | 0,825001 | 2,931738 | 1,425683 | 1,39956  | 0,123626 | 0,098181 | 0,000152 | 0        | 0        | 1,246095 | 3,985487 |
| 2,602021 | 4,078002 | 0,347245 | 1,950014 | 2,35103  | 2,401579 | 0,190971 | 0,065773 | 0,028425 | 0,000832 | 0        | 0        | 0        | 1,41933  | 4,223591 |
| 8,190225 | 2,363481 | 5,780881 | 2,339794 | 3,782316 | 1,474697 | 2,603513 | 1,405313 | 0,463133 | 1,307557 | 0,114951 | 0,13213  | 0,000267 | 1,875373 | 4,361797 |
| 7,075416 | 6,978248 | 3,654189 | 4,20861  | 2,457132 | 6,801387 | 0,347451 | 0,50057  | 8,21808  | 0,529226 | 0,321467 | 0        | 0        | 1,355566 | 6,931133 |
| 2,759953 | 6,084471 | 0,381126 | 15,43913 | 10,41512 | 3,544505 | 0,9712   | 0,280114 | 9,959791 | 0,653153 | 0,006919 | 0,254697 | 0        | 1,911321 | 4,244799 |
| 4,516766 | 4,426607 | 1,658536 | 2,474091 | 0,563666 | 2,600843 | 0,252539 | 1,301024 | 0,347388 | 0,157833 | 0,087326 | 0,01129  | 0        | 1,634746 | 4,554521 |
| 3,421569 | 9,064186 | 0,699351 | 3,76307  | 2,303644 | 2,122755 | 1,177237 | 0,497678 | 1,492209 | 0,133027 | 0,008957 | 0,001083 | 0        | 1,507061 | 4,539918 |
| 3,951501 | 4,361777 | 3,082312 | 2,577712 | 4,564686 | 3,901913 | 0,915924 | 1,78615  | 2,256668 | 3,638066 | 2,009737 | 0,967828 | 0,13916  | 1,521022 | 3,937117 |
| 3,007788 | 3,574532 | 3,116787 | 4,777195 | 3,199129 | 3,021024 | 6,123517 | 4,332718 | 3,276451 | 3,98434  | 2,030729 | 0,138084 | 0,008157 | 1,454314 | 4,355126 |
| 3,474714 | 8,487475 | 4,405069 | 2,880911 | 5,674393 | 2,678049 | 14,40015 | 0,250835 | 0,432506 | 0,754549 | 1,177129 | 1,508229 | 0        | 1,818638 | 3,821092 |
| 2,571944 | 6,802851 | 0,332381 | 5,49404  | 1,986239 | 6,736103 | 3,117674 | 2,264885 | 1,586051 | 2,964391 | 0,052135 | 0        | 0        | 1,348534 | 5,673565 |
| 5,297326 | 5,096155 | 5,422822 | 2,781016 | 2,452202 | 4,595918 | 1,655695 | 5,959948 | 1,494387 | 0,880267 | 0,05111  | 0,020225 | 0,000153 | 1,975184 | 1,770557 |

| RDF070v  | RDF075v  | RDF080v  | RDF085v  | RDF090v  | RDF100v  | RDF110v  | RDF045e  | RDF055e  | RDF060e  | RDF065p  | RDF085p  | RDF090p  | RDF095p  | RDF100p  |
|----------|----------|----------|----------|----------|----------|----------|----------|----------|----------|----------|----------|----------|----------|----------|
| 1,285083 | 1,695127 | 1,586375 | 1,448522 | 0,417322 | 0,018488 | 0        | 7,814221 | 7,914047 | 6,509202 | 3,028486 | 1,439022 | 0,639805 | 0,372884 | 0,03862  |
| 1,817998 | 1,67455  | 1,843892 | 1,465103 | 1,6929   | 0,509536 | 0,010441 | 10,62577 | 5,844507 | 6,222756 | 3,487178 | 1,38569  | 2,0333   | 1,260707 | 0,797908 |
| 2,938061 | 1,709898 | 1,656437 | 1,092061 | 0,20446  | 0,65083  | 0,057878 | 8,432724 | 4,988231 | 5,067655 | 3,607159 | 1,038462 | 0,295536 | 1,856354 | 0,566935 |
| 1,301364 | 3,668811 | 2,163102 | 3,558672 | 1,160618 | 0,667142 | 0,231911 | 12,67114 | 7,686466 | 6,393542 | 6,344339 | 3,559651 | 1,074365 | 1,389161 | 0,53321  |
| 1,692637 | 1,546331 | 3,30265  | 1,422536 | 0,20372  | 0,778687 | 0,000218 | 9,3911   | 6,346866 | 5,392388 | 3,549183 | 1,331379 | 0,283845 | 0,856628 | 0,568288 |
| 1,633334 | 4,037384 | 1,626917 | 2,431086 | 0,962673 | 1,779002 | 0,686336 | 13,23636 | 7,709607 | 9,688068 | 3,956402 | 1,984073 | 1,193467 | 0,755106 | 2,121469 |
| 3,059224 | 2,006102 | 0,662572 | 0,870172 | 1,536804 | 0,517956 | 0        | 14,88746 | 8,479337 | 6,440003 | 4,02148  | 0,887453 | 0,774699 | 0,242385 | 0,226397 |
| 2,945248 | 1,540995 | 2,496694 | 1,160508 | 1,016218 | 0,1852   | 0        | 14,10406 | 7,070739 | 10,60275 | 4,867706 | 1,19743  | 0,796615 | 0,217671 | 0,182131 |
| 2,69624  | 2,549107 | 1,95919  | 2,92668  | 1,478601 | 0,654118 | 0,272825 | 11,09015 | 9,581413 | 5,561763 | 4,657871 | 2,115431 | 1,219442 | 1,597572 | 0,820766 |
| 3,728007 | 1,430631 | 2,063704 | 2,855418 | 1,420304 | 1,610147 | 0,53286  | 11,66018 | 7,544878 | 4,189021 | 3,674315 | 2,324509 | 1,699797 | 0,498204 | 1,279817 |
| 3,384    | 3,144001 | 1,868125 | 2,225938 | 0,138831 | 0,001102 | 0        | 7,417533 | 11,31343 | 7,704126 | 3,4897   | 1,666129 | 0,148847 | 0,110169 | 0,001245 |
| 1,593179 | 2,580471 | 1,727566 | 3,052918 | 1,575213 | 2,224599 | 0,120328 | 10,41403 | 6,556795 | 4,748941 | 4,865494 | 2,064926 | 1,349091 | 1,176712 | 1,271437 |
| 2,368219 | 3,546167 | 2,813571 | 1,564248 | 1,089479 | 1,25021  | 0        | 11,58413 | 6,31997  | 5,499663 | 2,535808 | 1,452044 | 1,365424 | 1,356707 | 0,963874 |
| 1,293436 | 1,048304 | 0,428928 | 0,200701 | 0,151247 | 0        | 0        | 9,796627 | 11,23794 | 4,845266 | 2,981206 | 0,285663 | 0,139268 | 0,054037 | 0        |
| 1,151835 | 3,175934 | 0,30258  | 1,824962 | 0,085533 | 0        | 0        | 7,35965  | 5,779387 | 5,966336 | 2,63126  | 1,833125 | 0,178676 | 0,293364 | 0        |
| 2,743883 | 3,633192 | 1,698073 | 3,054241 | 1,379805 | 0,17871  | 0        | 11,34147 | 7,807806 | 5,88292  | 3,27148  | 3,163553 | 2,143439 | 0,773258 | 0,338478 |
| 3,419244 | 2,723851 | 1,511097 | 1,320751 | 0,582525 | 0,114278 | 0        | 13,5852  | 4,952391 | 2,982446 | 2,188288 | 1,316799 | 0,621463 | 0,230435 | 0,105663 |
| 2,225217 | 4,17318  | 1,049114 | 2,058801 | 1,655722 | 0,242448 | 0        | 9,669075 | 7,641762 | 5,744861 | 4,289943 | 2,011703 | 2,325247 | 0,312087 | 0,459092 |
| 2,521669 | 1,229272 | 1,856111 | 1,885033 | 1,111705 | 0,219278 | 0        | 9,372268 | 5,248621 | 4,666547 | 4,206185 | 2,113643 | 1,05974  | 0,494232 | 0,278157 |
| 1,706672 | 3,032818 | 2,366432 | 0,598253 | 0,209317 | 0,008158 | 0        | 4,351328 | 3,394844 | 6,94864  | 1,324867 | 0,916239 | 0,320631 | 0,408741 | 0,017042 |
| 2,325672 | 3,475778 | 2,090614 | 2,527738 | 1,317322 | 1,808904 | 0,498938 | 14,7026  | 13,08658 | 6,463202 | 3,960522 | 2,703686 | 1,442972 | 0,592313 | 2,1752   |
| 2,438861 | 1,799858 | 3,926137 | 0,297437 | 0,659261 | 0,612554 | 0        | 13,95216 | 12,8709  | 8,546703 | 2,324583 | 0,465185 | 0,970333 | 2,51443  | 1,005203 |
| 4,271513 | 3,490948 | 2,829302 | 0,835506 | 0,757589 | 0,356793 | 0,154511 | 4,340019 | 4,019706 | 8,179675 | 1,482538 | 1,299738 | 1,040251 | 2,217799 | 0,682448 |
| 2,587321 | 1,033663 | 3,074533 | 0,891705 | 0,905709 | 0,573488 | 0,110748 | 8,213729 | 7,479535 | 7,49936  | 2,477112 | 1,415674 | 0,756572 | 1,534421 | 0,903776 |
| 3,582916 | 2,975798 | 2,224398 | 1,842949 | 1,411751 | 0,582544 | 0,01062  | 7,214374 | 5,990711 | 12,9641  | 1,617496 | 2,285979 | 1,991437 | 1,409536 | 0,998872 |
| 3,385572 | 4,92594  | 4,289498 | 1,309026 | 1,97824  | 2,765165 | 0,867357 | 13,50309 | 8,386127 | 10,83437 | 3,745265 | 1,63341  | 2,172488 | 2,56087  | 2,517274 |
| 2,483507 | 2,450255 | 2,609379 | 2,368407 | 2,194617 | 1,660057 | 0,176791 | 5,45558  | 6,394744 | 6,445106 | 1,871329 | 1,640437 | 1,379121 | 1,244664 | 1,0771   |
| 2,780947 | 1,992615 | 2,692762 | 2,367143 | 0,509211 | 0,335358 | 0,706448 | 8,876351 | 4,454365 | 11,7398  | 2,751949 | 4,214091 | 0,697166 | 0,141374 | 0,925916 |
| 3,485105 | 2,577871 | 3,504977 | 1,71492  | 1,381766 | 1,116958 | 0        | 6,799835 | 3,770274 | 8,468001 | 1,207879 | 2,264801 | 1,758401 | 0,781252 | 1,284059 |
| 2,049769 | 2,002837 | 3,662406 | 1,73807  | 3,412562 | 1,408539 | 0,15508  | 13,16039 | 12,287   | 12,10911 | 4,18806  | 1,855289 | 2,532363 | 0,903479 | 1,686975 |

| RDF105p  | RDF020s  | RDF025s  | RDF030s  | RDF035s  | RDF040s  | RDF045s  | RDF050s  | RDF055s  | RDF060s  | RDF065s  | RDF070s  | RDF075s  | RDF080s  | RDF085s  |
|----------|----------|----------|----------|----------|----------|----------|----------|----------|----------|----------|----------|----------|----------|----------|
| 0        | 8,270539 | 71,26524 | 32,56464 | 40,90904 | 48,32177 | 36,97362 | 34,85703 | 40,35205 | 22,12996 | 15,21457 | 8,179979 | 24,41548 | 13,19316 | 20,80708 |
| 0,592749 | 8,792241 | 77,52119 | 34,32774 | 43,81484 | 58,37332 | 44,47002 | 36,26227 | 27,95017 | 31,55938 | 17,68509 | 13,76235 | 18,18203 | 20,22676 | 20,01891 |
| 0,067477 | 9,789371 | 69,11893 | 38,35254 | 39,1093  | 50,80683 | 43,64041 | 33,39185 | 28,96095 | 30,37827 | 24,52435 | 19,8093  | 12,59919 | 14,51261 | 15,81883 |
| 0,551775 | 17,76972 | 78,17642 | 33,46587 | 39,51465 | 61,14019 | 51,65405 | 38,04525 | 38,30347 | 27,37634 | 52,07253 | 7,545095 | 40,42405 | 27,18877 | 36,36874 |
| 0,002208 | 7,873593 | 68,89602 | 31,61267 | 35,32285 | 57,75772 | 51,82433 | 29,58182 | 43,32487 | 20,77873 | 22,50473 | 14,72512 | 18,47515 | 48,96533 | 19,22798 |
| 0,340777 | 17,77042 | 79,29297 | 27,17086 | 35,90775 | 36,16542 | 68,51222 | 22,49978 | 49,16734 | 30,166   | 46,94945 | 11,38292 | 56,3664  | 9,428606 | 34,58333 |
| 0        | 7,76847  | 80,24911 | 18,32546 | 37,00618 | 25,70578 | 67,71178 | 43,94809 | 49,00709 | 26,0041  | 81,4544  | 35,76661 | 12,07482 | 4,470324 | 12,24749 |
| 0,001307 | 8,899513 | 75,97074 | 26,96164 | 34,06454 | 35,31033 | 70,49236 | 22,54691 | 29,20652 | 33,44547 | 35,52355 | 19,6553  | 14,42833 | 34,36504 | 13,49768 |
| 1,02212  | 18,3627  | 76,45127 | 33,09023 | 50,94524 | 40,69014 | 64,3259  | 23,02229 | 58,36884 | 17,92101 | 48,00029 | 18,07662 | 26,14478 | 13,06925 | 39,72539 |
| 0,697384 | 10,79503 | 79,24401 | 47,08903 | 61,10555 | 25,93246 | 61,99672 | 48,85561 | 35,41506 | 7,658882 | 39,76876 | 39,94155 | 25,15881 | 20,27103 | 54,75717 |
| 0        | 10,88474 | 98,93172 | 30,56502 | 43,88358 | 35,47365 | 27,71098 | 65,11905 | 74,08986 | 31,83886 | 72,27877 | 46,37003 | 48,08189 | 56,7404  | 41,94193 |
| 0,597701 | 8,211941 | 84,11554 | 51,03375 | 57,56944 | 54,69988 | 66,40093 | 67,95834 | 41,66177 | 23,85841 | 49,87888 | 29,15729 | 46,50254 | 13,32668 | 82,93761 |
| 0,049723 | 7,466375 | 66,3261  | 31,02497 | 35,01252 | 72,55482 | 48,05352 | 34,33642 | 28,82127 | 30,40988 | 20,5179  | 19,77687 | 25,9053  | 53,94562 | 19,53841 |
| 0        | 8,106193 | 53,97594 | 22,78534 | 54,5792  | 12,35032 | 57,19874 | 18,14075 | 73,21841 | 25,58482 | 37,40606 | 20,64923 | 6,528493 | 13,55435 | 1,784691 |
| 0        | 6,688961 | 61,48969 | 12,15828 | 47,54012 | 28,65517 | 31,61216 | 29,69446 | 37,92753 | 31,38157 | 21,70677 | 19,02084 | 30,22708 | 4,026056 | 25,59047 |
| 0,192418 | 8,767029 | 76,9674  | 37,78376 | 42,69582 | 59,56528 | 39,38836 | 19,65781 | 25,35417 | 32,19057 | 18,9726  | 15,08692 | 36,66532 | 16,99389 | 37,21497 |
| 0        | 7,937305 | 80,61292 | 15,69713 | 52,22934 | 19,18047 | 88,445   | 16,0188  | 50,03095 | 13,26095 | 11,9915  | 71,67618 | 27,715   | 7,966631 | 18,58349 |
| 0        | 9,863544 | 68,46664 | 35,46437 | 39,47638 | 49,06782 | 38,5238  | 32,99933 | 33,13287 | 25,84917 | 33,3077  | 16,54913 | 42,9755  | 5,256503 | 30,41124 |
| 0,00311  | 7,988033 | 68,6896  | 22,70908 | 34,72973 | 49,42668 | 61,82292 | 24,86409 | 20,21098 | 13,68928 | 61,26056 | 17,87614 | 10,37245 | 24,97201 | 18,84265 |
| 0        | 9,024349 | 79,47305 | 37,44158 | 45,02665 | 47,96395 | 17,21708 | 47,56249 | 12,74688 | 20,84672 | 7,951348 | 22,09937 | 17,28031 | 20,26149 | 4,657299 |
| 0,400644 | 18,29662 | 85,5912  | 31,4539  | 61,79784 | 67,49926 | 64,10693 | 49,2878  | 74,61714 | 18,03031 | 55,80422 | 28,4956  | 29,2755  | 13,62228 | 27,99263 |
| 0,610636 | 8,900576 | 83,5762  | 32,50435 | 62,33296 | 82,21109 | 80,0488  | 55,53876 | 50,17813 | 39,82022 | 20,13735 | 27,08656 | 24,08199 | 35,66275 | 3,508396 |
| 0,007081 | 10,40428 | 71,17102 | 43,27165 | 60,51386 | 46,40873 | 15,98651 | 60,08486 | 18,73273 | 39,98394 | 7,569041 | 36,70594 | 34,30148 | 28,72124 | 6,287061 |
| 0,551614 | 10,22532 | 85,76726 | 42,08281 | 61,71616 | 46,58652 | 32,6625  | 51,05618 | 45,11062 | 33,04178 | 12,89558 | 26,35896 | 17,202   | 20,75098 | 7,669975 |
| 0,146193 | 9,455249 | 80,3123  | 33,7874  | 69,45971 | 48,7259  | 28,21472 | 49,67434 | 29,44133 | 75,53714 | 9,466904 | 25,76277 | 26,70371 | 18,29921 | 8,742969 |
| 1,663898 | 9,996103 | 88,33188 | 52,11845 | 35,1839  | 38,26359 | 64,30539 | 39,90438 | 29,20158 | 27,515   | 19,37224 | 20,47375 | 36,70444 | 47,15643 | 7,802052 |
| 0,706304 | 9,50947  | 93,80035 | 68,40111 | 69,52121 | 58,16898 | 24,73918 | 101,74   | 32,57536 | 17,68536 | 29,72294 | 55,36975 | 38,38315 | 23,57094 | 75,63068 |
| 1,220194 | 9,495552 | 73,69799 | 50,10492 | 61,42375 | 49,49094 | 59,32604 | 40,14099 | 32,96665 | 65,15523 | 9,450656 | 21,41457 | 13,28794 | 24,55911 | 12,44954 |
| 0,099032 | 8,443651 | 73,46815 | 37,40248 | 59,15103 | 67,79896 | 39,37504 | 52,75427 | 15,56173 | 29,10543 | 6,450622 | 33,90669 | 14,04601 | 36,0764  | 12,81121 |
| 0,522451 | 20,11856 | 88,47882 | 20,8766  | 75,40691 | 16,19805 | 69,07359 | 20,03943 | 43,59439 | 45,13249 | 58,12712 | 29,44394 | 22,7581  | 32,99953 | 15,10367 |

| RDF090s  | RDF095s  | RDF100s  | RDF105s  | RDF110s  | Mor02u   | Mor03u   | Mor04u   | Mor05u   | Mor06u   | Mor07u   | Mor08u   | Mor09u   | Mor10u   | Mor11u   |
|----------|----------|----------|----------|----------|----------|----------|----------|----------|----------|----------|----------|----------|----------|----------|
| 3,091438 | 9,273538 | 0,266469 | 0        | 0        | 26,17711 | -2,26381 | -0,98303 | -3,4092  | -1,60544 | 4,153759 | -0,06831 | -0,4755  | -0,61554 | 0,543323 |
| 8,249044 | 8,012561 | 4,386948 | 9,394031 | 0,150495 | 28,63096 | -1,96655 | -0,72377 | -3,40797 | -1,45331 | 3,412661 | 0,425821 | -0,38274 | -0,74463 | 0,533645 |
| 1,310806 | 7,981764 | 13,34102 | 0,281257 | 0,468931 | 24,18821 | -2,23323 | -0,65653 | -2,97651 | -0,93952 | 3,304881 | 0,006802 | -0,69304 | -0,33676 | 0,498322 |
| 12,95805 | 29,93193 | 11,37455 | 3,527576 | 6,317476 | 28,03486 | -1,65052 | -1,57229 | -3,74151 | -1,25405 | 4,184423 | 0,495535 | -0,38829 | -0,72463 | 0,651985 |
| 1,292333 | 7,038708 | 28,58677 | 0,019251 | 0,003124 | 24,56651 | -2,29399 | -0,80996 | -3,2685  | -0,78967 | 3,358982 | 0,059832 | -0,65618 | -0,55446 | 0,585966 |
| 16,93851 | 11,12278 | 8,528631 | 1,788813 | 16,38865 | 28,24636 | -2,0048  | -1,3075  | -4,52193 | -1,44092 | 3,806431 | 0,399729 | -0,28597 | -0,49703 | 0,422824 |
| 29,35965 | 7,466514 | 50,76239 | 0        | 0        | 25,90671 | -2,5399  | -1,181   | -3,10432 | -1,56253 | 3,863625 | 0,391786 | -0,96883 | -0,15822 | 1,092077 |
| 17,85386 | 3,321704 | 6,651258 | 0,009017 | 0,000332 | 29,758   | -1,84351 | -0,3006  | -3,28626 | -1,82963 | 3,248982 | 0,580456 | -0,74002 | -0,86068 | 0,404282 |
| 15,61675 | 5,980126 | 7,314274 | 12,69574 | 7,376634 | 27,87345 | -1,96393 | -1,29108 | -3,9299  | -0,88003 | 4,512983 | 0,386708 | -1,52424 | -0,33234 | 0,707436 |
| 12,39025 | 25,44784 | 19,15748 | 29,77453 | 8,13608  | 26,29672 | -1,38364 | -1,48983 | -3,34322 | -2,03453 | 4,829404 | 0,024367 | -0,77752 | -0,02304 | 0,799247 |
| 1,439631 | 3,098835 | 0,043828 | 0        | 0        | 28,42796 | -3,11789 | -0,42824 | -3,52512 | -1,34713 | 3,854187 | 0,426661 | -0,94362 | -0,43185 | 0,483466 |
| 19,40654 | 19,6875  | 75,98386 | 15,62672 | 6,51054  | 26,70726 | -2,76285 | -0,61033 | -3,56314 | -1,1923  | 4,519631 | -0,19654 | -0,99789 | 0,041027 | 0,711767 |
| 7,534974 | 6,777997 | 44,63172 | 0,433508 | 0        | 23,28899 | -2,73485 | -1,05364 | -3,75048 | -0,24186 | 2,726819 | 0,385712 | -0,58964 | -0,05587 | 0,609282 |
| 5,616897 | 0,948938 | 0        | 0        | 0        | 25,22895 | -1,88071 | -1,13273 | -2,12128 | -2,00741 | 3,906309 | 0,938583 | -1,38115 | -0,19746 | 0,409451 |
| 1,232827 | 7,028698 | 0        | 0        | 0        | 24,16241 | -2,24951 | -0,9485  | -2,09797 | -1,79829 | 3,159933 | 0,218575 | -0,41655 | -0,28675 | 0,305777 |
| 11,42982 | 4,471642 | 2,729051 | 7,136938 | 0        | 29,09953 | -3,17819 | -0,97062 | -4,09059 | -1,26412 | 3,67977  | 0,496366 | -0,61294 | -0,37719 | 0,500139 |
| 9,328279 | 2,580015 | 4,23625  | 0        | 0        | 26,23495 | -2,62696 | -1,73577 | -3,17581 | -2,04805 | 4,27312  | 0,208854 | -0,98093 | -0,19784 | 0,683918 |
| 7,792559 | 4,045312 | 2,577667 | 0,001983 | 0        | 24,53353 | -2,50551 | -1,12463 | -3,86151 | -0,87847 | 3,456147 | 0,588858 | -0,79341 | -0,02904 | 0,508314 |
| 15,90309 | 4,73011  | 6,660963 | 0,021459 | 0        | 26,43996 | -2,12801 | -0,24339 | -2,84346 | -1,16901 | 3,148466 | 0,36367  | -0,60058 | -0,51717 | 0,662404 |
| 3,555077 | 2,674425 | 0,117586 | 0        | 0        | 28,25809 | -2,06041 | -0,56327 | -2,9681  | -2,50397 | 3,496512 | -0,13507 | 0,172887 | -0,67788 | 0,486838 |
| 10,1667  | 5,400932 | 9,647275 | 4,503291 | 4,22918  | 30,25823 | -2,11746 | -0,59857 | -3,29794 | -2,42758 | 4,425477 | 0,441134 | 0,03769  | -0,67665 | 0,294496 |
| 6,850754 | 35,23848 | 8,763825 | 5,323858 | 0        | 26,38833 | -3,22126 | -0,99938 | -3,21523 | -1,29562 | 2,620756 | 0,836433 | -0,77975 | -0,58431 | 0,516373 |
| 11,09984 | 15,4385  | 2,800123 | 0,02897  | 1,251863 | 26,57888 | -2,16218 | -0,10986 | -2,96526 | -2,03003 | 2,803746 | -0,17574 | -0,1917  | -0,56289 | 0,398836 |
| 14,95946 | 10,73137 | 4,968898 | 3,226895 | 1,596267 | 31,08378 | -2,04496 | -0,20052 | -3,47577 | -2,62013 | 3,303126 | 0,720289 | 0,271563 | -0,82495 | 0,186507 |
| 15,08187 | 20,93495 | 5,638346 | 1,110858 | 0,153064 | 31,89595 | -2,44931 | -0,36996 | -3,99426 | -2,53007 | 3,169168 | 0,015079 | 0,110979 | -0,97069 | 0,17307  |
| 18,38897 | 22,15758 | 34,83287 | 15,16347 | 11,817   | 34,08191 | -4,12563 | -0,32421 | -5,38088 | -2,20354 | 3,988927 | 0,635722 | -1,08814 | -0,09852 | 0,472934 |
| 41,23795 | 46,05052 | 68,60373 | 31,52149 | 8,302917 | 29,13076 | -2,86522 | 0,008267 | -3,45536 | -2,07217 | 3,882299 | -0,07002 | -0,16627 | -0,26447 | 0,498469 |
| 6,23235  | 0,307653 | 1,711656 | 2,165613 | 3,598226 | 25,92887 | -2,22466 | -0,26478 | -2,87802 | -2,50689 | 3,099325 | 0,175147 | -0,47082 | -0,18826 | 0,407182 |
| 10,63456 | 6,558191 | 6,585624 | 0,863412 | 0,001092 | 26,64648 | -2,24482 | -0,02318 | -3,04052 | -1,9421  | 2,670618 | 0,091015 | -0,0726  | -0,61873 | 0,513542 |
| 43,53252 | 10,99192 | 9,102003 | 3,476205 | 2,06693  | 32,40475 | -2,76802 | -2,07977 | -3,31394 | -3,14509 | 5,057523 | 1,032016 | -1,53338 | -0,0215  | 0,469499 |

| Mor12u   | Mor13u   | Mor14u   | Mor15u   | Mor16u   | Mor17u   | Mor20u   | Mor21u   | Mor22u   | Mor23u   | Mor24u   | Mor25u   | Mor27u   | Mor28u   | Mor29u   |
|----------|----------|----------|----------|----------|----------|----------|----------|----------|----------|----------|----------|----------|----------|----------|
| -0,55081 | -0,1202  | 0,961627 | -0,31912 | 0,713959 | -0,53495 | 0,953891 | -0,49158 | 0,398818 | -0,66105 | -0,31567 | 0,724883 | -0,11818 | -0,11623 | -0,15291 |
| -0,72228 | 0,026346 | 0,898051 | -0,33172 | 0,591567 | -0,54175 | 1,121977 | -0,62464 | 0,154017 | -0,43238 | -0,38617 | 0,87379  | 0,046099 | -0,24572 | -0,22841 |
| -0,32212 | -0,50868 | 0,825763 | -0,3343  | 0,697613 | -0,5746  | 0,757782 | -0,44651 | 0,162498 | -0,60193 | -0,35146 | 0,678184 | -0,1798  | 0,070282 | -0,12686 |
| -0,44891 | -0,18485 | 0,765874 | -0,1615  | 0,54429  | -0,4847  | 1,093721 | -0,58458 | 0,187571 | -0,65327 | -0,34922 | 0,870331 | 0,085798 | -0,29207 | -0,17432 |
| -0,4419  | -0,07765 | 0,755987 | -0,33474 | 0,594752 | -0,48208 | 0,922568 | -0,59059 | 0,364306 | -0,4818  | -0,20218 | 0,672882 | -0,05694 | -0,03197 | -0,25664 |
| -0,57899 | -0,01415 | 0,832445 | -0,26106 | 0,615603 | -0,45835 | 1,024751 | -0,37616 | 0,125258 | -0,75934 | -0,13659 | 0,670255 | -0,25619 | -0,07277 | -0,3982  |
| -0,61841 | -0,22214 | 0,453419 | 0,059203 | 0,61147  | -0,13645 | 0,676773 | -0,3085  | 0,30883  | -0,67135 | -0,28957 | 0,69001  | -0,19345 | -0,08282 | -0,12437 |
| -0,99432 | 0,251295 | 1,330052 | -0,61871 | 1,029855 | -0,59405 | 0,686419 | -0,4579  | 0,047335 | -0,62894 | -0,34308 | 0,731392 | -0,10264 | -0,20933 | -0,35981 |
| -0,10946 | -0,38083 | 0,537378 | -0,41173 | 0,873684 | -0,52861 | 0,90318  | -0,33859 | 0,224886 | -0,70489 | -0,23037 | 0,712907 | -0,06645 | -0,24281 | -0,22145 |
| -0,49339 | -0,15262 | 0,497578 | -0,27047 | 0,654671 | -0,42271 | 0,751463 | -0,56123 | 0,325843 | -0,59177 | -0,11633 | 0,646558 | -0,08382 | -0,15334 | -0,16104 |
| -0,31644 | -0,13656 | 0,588231 | -0,04181 | 0,758714 | -0,41743 | 0,841259 | -0,59706 | 0,451297 | -0,66672 | -0,26592 | 0,75108  | -0,06603 | -0,16704 | -0,24288 |
| -0,41444 | -0,27351 | 0,60283  | -0,21609 | 0,734601 | -0,73907 | 1,060005 | -0,60439 | 0,262159 | -0,5893  | -0,14409 | 0,662705 | -0,20029 | -0,08652 | -0,10739 |
| -0,2046  | -0,29171 | 0,601289 | -0,33192 | 0,426885 | -0,02387 | 0,769893 | -0,457   | 0,250948 | -0,40504 | -0,22294 | 0,473178 | -0,09951 | 0,009986 | -0,07557 |
| -0,56065 | 0,235074 | 0,055661 | -0,11108 | 0,71001  | -0,17427 | 0,11639  | -0,03485 | 0,147378 | -0,57834 | -0,31568 | 0,525331 | 0,011249 | -0,41118 | -0,40713 |
| -0,60381 | 0,165146 | 0,524825 | -0,23821 | 0,471006 | -0,23021 | 0,306758 | -0,03573 | 0,09347  | -0,47358 | -0,17806 | 0,398874 | -0,08613 | -0,18704 | -0,26994 |
| -0,58508 | 0,320683 | 0,890186 | -0,50681 | 0,528513 | -0,47282 | 0,997365 | -0,43025 | 0,278082 | -0,72208 | -0,3762  | 0,725704 | -0,06123 | -0,21152 | -0,34051 |
| -0,30501 | -0,21082 | 0,29667  | -0,32474 | 0,184776 | -0,3277  | 0,76842  | -0,37152 | 0,283507 | -0,80032 | -0,22197 | 0,654727 | -0,04673 | -0,20936 | -0,11904 |
| -0,1921  | -0,31601 | 0,873298 | -0,34749 | 0,552714 | -0,37559 | 0,693198 | -0,24099 | 0,321138 | -0,65599 | -0,22495 | 0,61716  | -0,15753 | 0,001827 | -0,23077 |
| -0,65838 | 0,124383 | 0,975943 | -0,28541 | 0,778469 | -0,38568 | 0,635573 | -0,42586 | 0,192861 | -0,52462 | -0,14743 | 0,615934 | -0,0978  | 0,051671 | -0,18804 |
| -1,39615 | 0,473261 | 1,07348  | -0,70652 | 1,058396 | -0,9423  | 0,953203 | -0,74684 | 0,484261 | -0,97938 | -0,16624 | 0,670254 | -0,03065 | -0,13385 | -0,31843 |
| -0,98431 | 0,165822 | 0,724963 | 0,084749 | 0,780355 | -0,93139 | 0,961063 | -0,7301  | 0,291372 | -0,86452 | -0,14242 | 0,912469 | -0,16508 | -0,24043 | -0,33918 |
| -0,74231 | -0,00908 | 0,769578 | 0,207893 | 0,451057 | -0,0524  | 0,735087 | -0,75284 | 0,418576 | -0,56081 | -0,14012 | 0,667036 | -0,02549 | -0,29539 | -0,19214 |
| -0,91652 | 0,263421 | 0,79124  | -0,45282 | 1,083412 | -1,07808 | 0,990134 | -0,81826 | 0,293927 | -0,69805 | -0,3828  | 0,781947 | 0,082191 | -0,20321 | -0,24544 |
| -1,49349 | 0,475746 | 1,054212 | -0,39982 | 0,708912 | -0,88587 | 1,189929 | -0,82732 | 0,02345  | -0,48412 | -0,32936 | 0,5885   | 0,163985 | -0,38119 | -0,2616  |
| -1,46232 | 0,58194  | 0,960089 | -0,39991 | 1,035899 | -1,03907 | 1,420838 | -1,01094 | 0,202608 | -0,64058 | -0,48141 | 0,796323 | 0,08914  | -0,37192 | -0,29697 |
| -0,40639 | -0,25409 | 1,348206 | -0,27503 | 0,978193 | -0,82747 | 1,318204 | -0,88335 | 0,426794 | -0,8964  | -0,30138 | 1,131946 | -0,11253 | -0,23338 | -0,38278 |
| -1,2309  | 0,28666  | 0,478894 | 0,086837 | 0,892992 | -0,9049  | 1,099798 | -0,70625 | 0,051296 | -0,70665 | -0,0108  | 0,670072 | -0,00531 | -0,22524 | -0,08229 |
| -1,04936 | 0,212784 | 1,099195 | -0,73322 | 1,115511 | -0,68104 | 0,993783 | -0,73247 | 0,405617 | -0,57177 | -0,22257 | 0,670053 | -0,08138 | -0,00317 | -0,29844 |
| -1,27637 | 0,435006 | 0,899279 | -0,71196 | 1,058551 | -0,86822 | 1,080725 | -0,70925 | 0,401826 | -0,49085 | -0,24205 | 0,598734 | 0,113348 | -0,17047 | -0,28604 |
| -0,50257 | -0,02217 | 0,53188  | 0,016832 | 1,040702 | -0,32825 | 1,075656 | -0,42849 | 0,124062 | -0,90459 | -0,13057 | 0,656095 | 0,113246 | -0,5066  | -0,50694 |

| Mor30u   | Mor32u   | Mor02m   | Mor03m   | Mor04m   | Mor05m   | Mor06m   | Mor07m   | Mor08m   | Mor09m   | Mor10m   | Mor11m   | Mor12m   | Mor13m   | Mor14m   |
|----------|----------|----------|----------|----------|----------|----------|----------|----------|----------|----------|----------|----------|----------|----------|
| -0,15301 | -0,25758 | 15,08567 | -1,6713  | -1,54424 | -2,85954 | 0,337942 | 3,515105 | -0,78121 | -1,47273 | 0,075482 | 0,540826 | 0,658406 | -0,84674 | -0,13819 |
| -0,21377 | -0,24228 | 16,25275 | -1,66289 | -1,63693 | -2,97087 | 0,747954 | 3,392446 | -0,9291  | -1,61393 | 0,223976 | 0,567633 | 0,630783 | -0,94038 | 0,002799 |
| -0,13512 | -0,22972 | 18,37284 | -1,94561 | -0,96614 | -2,75538 | 1,148784 | 1,062275 | -0,03688 | -1,60255 | -0,22488 | 0,38461  | 1,644631 | -1,15806 | -0,8215  |
| 0,083939 | -0,23562 | 17,90712 | -1,46187 | -1,9155  | -3,19958 | 0,524136 | 4,251167 | -0,89171 | -1,71768 | 0,234217 | 0,760268 | 0,900502 | -0,96906 | -0,32012 |
| -0,0707  | -0,17153 | 17,08491 | -1,76299 | -1,51832 | -3,06866 | 1,346456 | 2,46728  | -0,87439 | -1,28201 | -0,30562 | 0,546048 | 0,590227 | -0,47779 | -0,30512 |
| 0,18767  | 0,006013 | 17,28554 | -1,67416 | -1,76024 | -3,21253 | 0,216493 | 4,17771  | -0,88269 | -1,63593 | 0,158434 | 0,559639 | 0,822186 | -0,79779 | -0,21548 |
| -0,04237 | -0,07521 | 17,22231 | -1,72805 | -2,00736 | -2,63191 | 0,232782 | 3,78536  | -0,83998 | -1,64021 | 0,420441 | 0,947176 | 0,854486 | -0,84089 | -0,36625 |
| -0,11024 | -0,17242 | 16,45169 | -0,68572 | -1,28737 | -2,81458 | 0,597184 | 2,916401 | -0,56952 | -1,72017 | 0,311696 | 0,638845 | 0,478464 | -0,65279 | 0,087019 |
| 0,0808   | -0,2174  | 21,19256 | -1,80645 | -2,5035  | -3,04115 | 0,11876  | 4,980667 | -0,93494 | -2,24052 | 0,317911 | 0,844388 | 0,764271 | -0,85626 | -0,37196 |
| 0,01263  | -0,05586 | 19,08412 | -0,23644 | -2,05308 | -3,01162 | -0,71577 | 4,627506 | -0,77994 | -1,61537 | 0,503479 | 0,89053  | 0,734978 | -0,70111 | -0,38269 |
| -0,01226 | -0,06702 | 20,14501 | -1,68272 | -1,29353 | -2,65251 | 0,523645 | 3,832063 | -0,61465 | -1,84028 | 0,414489 | 0,326243 | 0,938581 | -0,60285 | -0,46555 |
| -0,04159 | -0,15207 | 22,38423 | -2,85148 | -1,13909 | -3,12002 | -0,1166  | 4,783256 | -1,1057  | -2,14387 | 0,925279 | 0,798379 | 0,52504  | -0,67376 | -0,41831 |
| -0,22571 | -0,07139 | 18,0944  | -2,48153 | -1,40521 | -3,1957  | 1,690155 | 1,910948 | -0,94177 | -0,61333 | -0,73274 | 0,809384 | 0,618482 | -0,27153 | -0,70377 |
| 0,20239  | 0,050845 | 15,21525 | -1,17831 | -2,26374 | -1,69586 | -0,69956 | 3,73906  | -0,12726 | -1,99719 | 0,102122 | 0,519955 | 0,592617 | -0,66785 | -0,24147 |
| 0,023444 | 0,055286 | 15,38626 | -2,4762  | -2,35382 | -2,01938 | -0,45359 | 2,726514 | -0,90944 | -0,56942 | 0,045928 | 0,480043 | 0,314869 | -0,40849 | -0,02544 |
| -0,23815 | -0,07352 | 15,80374 | -1,95267 | -1,60452 | -2,84108 | 0,391112 | 3,339537 | -0,86089 | -1,59921 | 0,219424 | 0,495454 | 0,782089 | -0,89612 | 0,031968 |
| -0,02178 | -0,0572  | 15,10676 | -1,68437 | -2,10944 | -2,86828 | -0,06919 | 3,89698  | -1,00092 | -1,74044 | 0,205205 | 0,805488 | 0,960031 | -0,87545 | -0,51855 |
| -0,19197 | -0,02278 | 16,67694 | -3,43647 | -0,33878 | -3,92175 | 1,898298 | 1,918559 | 0,72332  | -1,32211 | -0,0876  | 0,433737 | 1,748452 | -0,87463 | -0,47192 |
| -0,05235 | -0,16891 | 15,86506 | -0,55089 | -0,6488  | -3,14279 | 1,613196 | 2,21399  | -0,31759 | -1,21406 | 0,069594 | 0,780135 | 0,764751 | -0,44701 | -0,08658 |
| -0,01404 | -0,0509  | 14,21042 | -0,87498 | -2,25717 | -3,02404 | 0,44483  | 2,790957 | -1,21689 | -1,01931 | -0,01081 | 0,747151 | 0,353887 | -0,40712 | -0,07419 |
| 0,259998 | -0,01415 | 17,20273 | -0,86687 | -2,13716 | -3,23008 | 0,445769 | 4,502766 | -1,07499 | -1,3453  | 0,083725 | 0,805878 | 0,747723 | -1,19139 | -0,17862 |
| 0,011606 | -0,30103 | 18,18268 | -2,01141 | -1,12667 | -3,2326  | 1,46111  | 2,014471 | -1,08545 | -0,72821 | -0,63149 | 0,770075 | 0,487373 | -0,54488 | -0,22255 |
| 0,066387 | -0,01986 | 18,58869 | -1,1044  | -1,20032 | -3,62594 | 0,76962  | 0,922648 | -0,67314 | -1,12685 | -0,41257 | 0,44688  | 1,412022 | -0,71792 | -0,67546 |
| -0,06902 | -0,1896  | 15,48577 | -0,97559 | -1,98438 | -3,27417 | 0,551295 | 3,383471 | -1,23155 | -1,1042  | 0,205994 | 0,663254 | 0,347346 | -0,80365 | 0,078924 |
| -0,07551 | 0,014248 | 15,61807 | -1,13119 | -2,03616 | -3,18314 | 0,331193 | 2,864087 | -1,56404 | -1,27202 | 0,108969 | 0,533972 | 0,317077 | -0,63164 | 0,036407 |
| -0,06712 | -0,13328 | 18,8948  | -2,41651 | -1,29504 | -4,47207 | 1,453182 | 3,186311 | -0,9512  | -1,92277 | 0,746037 | 0,677015 | 0,868852 | -1,17997 | -0,24109 |
| 0,033449 | -0,10906 | 22,37215 | -2,09584 | -1,56451 | -3,28427 | -0,03594 | 4,412093 | -1,57588 | -1,4963  | 0,622628 | 0,705986 | 0,568007 | -0,62257 | -0,45473 |
| -0,0657  | -0,16684 | 18,22408 | -1,44426 | -0,09172 | -3,19249 | -1,44884 | 3,19275  | 0,018685 | -2,37719 | 1,7067   | 0,367002 | 0,214196 | -1,01146 | 1,561667 |
| -0,00221 | -0,00116 | 16,63809 | -1,04799 | -1,7356  | -3,34275 | 1,030772 | 1,703045 | -1,10589 | -1,13219 | -0,03581 | 0,612909 | 0,36374  | -0,24642 | -0,10864 |
| 0,047026 | -0,07545 | 22,16387 | -1,83466 | -2,69411 | -2,56307 | -1,0067  | 4,65477  | -0,8069  | -1,97533 | 0,223941 | 1,099992 | 0,811966 | -0,85908 | -0,35457 |

| Mor15m   | Mor16m   | Mor17m   | Mor18m   | Mor19m   | Mor20m   | Mor21m   | Mor22m   | Mor23m   | Mor24m   | Mor25m   | Mor26m   | Mor27m   | Mor28m   | Mor29m   |
|----------|----------|----------|----------|----------|----------|----------|----------|----------|----------|----------|----------|----------|----------|----------|
| 0,212182 | 0,314762 | 0,208578 | -0,78858 | 0,174397 | 0,221389 | -0,03002 | 0,264689 | -0,3021  | -0,04595 | 0,224465 | -0,02982 | 0,051214 | -0,00841 | 0,003461 |
| 0,061571 | 0,287096 | 0,222383 | -0,79509 | 0,241736 | 0,258578 | -0,0151  | 0,21711  | -0,3156  | -0,07803 | 0,329219 | 0,044483 | 0,122378 | 0,003728 | -0,005   |
| 0,638758 | -0,14228 | -0,14001 | -0,57951 | 0,501395 | -0,28381 | 0,393081 | 0,164107 | -0,70725 | -0,14342 | 0,381882 | -0,1817  | -0,04822 | 0,430419 | -0,25709 |
| 0,296387 | 0,249258 | 0,292993 | -0,96    | 0,040336 | 0,438166 | -0,14873 | 0,284412 | -0,4894  | -0,08677 | 0,374729 | -0,01783 | 0,099875 | -0,08005 | 0,040086 |
| 0,264136 | 0,295315 | 0,269624 | -0,92422 | -0,00525 | 0,493015 | -0,36174 | 0,438829 | -0,22192 | 0,01617  | 0,206962 | 0,10932  | 0,194619 | -0,12093 | -0,10245 |
| 0,355765 | 0,211846 | 0,449907 | -0,81451 | 0,050969 | 0,341181 | -0,04795 | 0,512658 | -0,61801 | 0,061788 | 0,247709 | 0,089333 | -0,05922 | 0,011703 | -0,04285 |
| 0,444474 | 0,329329 | 0,447423 | -0,76982 | -0,01125 | 0,229069 | -0,10506 | 0,38295  | -0,61984 | -0,05159 | 0,260177 | 0,094111 | -0,21615 | 0,028328 | -0,01997 |
| 0,007363 | 0,58252  | 0,123033 | -0,71077 | 0,391543 | 0,059583 | -0,13597 | 0,106892 | -0,36036 | -0,03886 | 0,174412 | -0,05877 | -0,00206 | 0,028771 | -0,00669 |
| 0,063021 | 0,578803 | 0,167295 | -0,99609 | 0,106921 | 0,12696  | 0,09501  | 0,437987 | -0,68776 | -0,05003 | 0,363686 | 0,053665 | 0,090404 | -0,12761 | -0,13441 |
| -0,02479 | 0,344176 | 0,293161 | -0,82264 | 0,315963 | 0,213474 | -0,2695  | 0,373827 | -0,34152 | 0,061373 | 0,230615 | -0,07295 | -0,10633 | 0,013549 | 0,002249 |
| 0,39618  | 0,449753 | 0,354411 | -0,75017 | 0,316209 | 0,191264 | -0,14785 | 0,380091 | -0,40784 | 0,001222 | 0,294596 | -0,18173 | 0,029916 | -0,04729 | -0,0531  |
| 0,352667 | 0,4768   | -0,07685 | -0,68732 | 0,169468 | 0,405053 | -0,05208 | 0,273865 | -0,51361 | 0,165591 | 0,23014  | 0,124761 | -0,02357 | -0,1178  | 0,042617 |
| 0,497866 | 0,068902 | 0,829695 | -1,14165 | 0,221644 | 0,548122 | -0,44838 | 0,3111   | -0,06716 | 0,016011 | 0,242058 | 0,09581  | 0,166396 | -0,2005  | 0,229767 |
| -0,29449 | 0,813782 | 0,304537 | -0,5839  | 0,220429 | -0,18319 | 0,092288 | 0,417216 | -0,48054 | -0,11375 | 0,184633 | 0,171379 | 0,010116 | -0,23196 | -0,26539 |
| -0,37657 | 0,214023 | 0,446465 | -0,64567 | -0,02142 | 0,032731 | 0,072506 | 0,391086 | -0,56377 | 0,028782 | 0,164507 | 0,026547 | -0,05968 | -0,16708 | -0,00417 |
| -0,14615 | 0,289439 | 0,306538 | -0,8637  | 0,249777 | 0,224638 | 0,008268 | 0,357286 | -0,47863 | -0,01213 | 0,287429 | -0,01699 | 0,001523 | -0,03453 | -0,08383 |
| 0,148069 | 0,106162 | 0,272535 | -0,78327 | 0,191388 | 0,248913 | 0,133199 | 0,256884 | -0,531   | -0,07614 | 0,287734 | 0,086659 | -0,01948 | -0,04716 | -0,01398 |
| 0,677358 | -0,25625 | -0,01431 | -0,99092 | 0,623116 | -0,2115  | 0,485401 | 0,381458 | -0,81573 | 0,143    | 0,220649 | -0,24903 | -0,10702 | 0,286188 | -0,2807  |
| 0,319924 | 0,312397 | 0,352029 | -0,75827 | 0,233935 | 0,101364 | -0,09682 | 0,13105  | -0,27453 | 0,00332  | 0,135484 | 0,08562  | 0,023051 | 0,030604 | 0,095418 |
| -0,07673 | 0,536524 | 0,020154 | -0,50894 | 0,208521 | 0,159622 | -0,20384 | 0,382298 | -0,4295  | 0,025172 | 0,121132 | 0,116051 | 0,039158 | -0,02156 | -0,06559 |
| 0,29279  | 0,485016 | 0,074845 | -0,84602 | 0,297181 | 0,185482 | -0,1297  | 0,398498 | -0,42034 | -0,07261 | 0,385485 | -0,00794 | -0,10025 | -0,06068 | -0,07622 |
| 0,709547 | 0,267892 | 0,583809 | -1,08967 | 0,287637 | 0,366255 | -0,50655 | 0,270243 | 0,026331 | -0,17754 | 0,335322 | -0,03259 | 0,113472 | -0,3797  | 0,076613 |
| 0,488393 | 0,035839 | -0,14007 | -0,42748 | 0,510591 | -0,28682 | 0,087512 | 0,090673 | -0,66848 | -0,00698 | 0,303109 | -0,33711 | 0,016185 | 0,414517 | -0,28671 |
| -0,08474 | 0,619778 | 0,064856 | -0,58612 | 0,319762 | 0,237198 | -0,31597 | 0,211718 | -0,11714 | -0,15609 | 0,153955 | 0,061114 | 0,145611 | -0,0924  | -0,05044 |
| -0,01242 | 0,612776 | 0,113156 | -0,6345  | 0,356608 | 0,315525 | -0,25654 | 0,294746 | -0,31768 | -0,12246 | 0,097834 | 0,039575 | 0,056105 | -0,02388 | -0,07514 |
| 0,401292 | 0,406506 | 0,189884 | -0,81931 | 0,293106 | 0,39823  | -0,25454 | 0,356984 | -0,4586  | 0,125742 | 0,361112 | -0,02566 | -0,09661 | -0,06785 | -0,02218 |
| 0,348316 | 0,819976 | -0,28201 | -0,53482 | 0,348062 | 0,460206 | -0,14668 | 0,134896 | -0,50453 | 0,155794 | 0,275948 | 0,010088 | 0,116796 | -0,18866 | 0,089595 |
| -1,44897 | 1,717107 | 0,518015 | -0,74657 | -0,31934 | 0,932488 | -0,86855 | 0,959294 | 0,015742 | -0,19553 | -0,1675  | 0,374485 | -0,24357 | 0,166255 | -0,06299 |
| -0,08432 | 0,62898  | 0,162732 | -0,65927 | -0,01473 | 0,532145 | -0,46888 | 0,381986 | -0,1354  | -0,02702 | 0,200675 | 0,006506 | 0,174933 | -0,21032 | -0,03855 |
| 0,200649 | 0,940348 | 0,269169 | -0,93201 | 0,117927 | 0,28908  | 0,132498 | 0,328133 | -0,60795 | -0,06562 | 0,363415 | -0,02643 | 0,096038 | -0,13604 | -0,2759  |

| Mor30m   | Mor31m   | Mor32m   | Mor03v   | Mor04v   | Mor06v   | Mor11v   | Mor14v   | Mor16v   | Mor17v   | Mor18v   | Mor19v   | Mor21v   | Mor22v   | Mor23v   |
|----------|----------|----------|----------|----------|----------|----------|----------|----------|----------|----------|----------|----------|----------|----------|
| 0,146424 | 0,0587   | -0,17547 | -1,17563 | -1,39454 | 0,175656 | 0,52678  | 0,186028 | 0,246444 | -0,03919 | -0,75281 | 0,288671 | -0,18384 | 0,171186 | -0,30219 |
| -0,00103 | 0,078119 | -0,08962 | -1,10159 | -1,29904 | 0,46563  | 0,590027 | 0,27746  | 0,167091 | -0,06846 | -0,74102 | 0,372685 | -0,20842 | 0,112483 | -0,27562 |
| 0,147819 | -0,09046 | -0,122   | -1,30221 | -1,13041 | 0,583943 | 0,48366  | 0,049477 | 0,166021 | -0,08214 | -0,66524 | 0,362793 | -0,13915 | 0,115648 | -0,3606  |
| 0,179547 | 0,057409 | -0,23295 | -0,95897 | -1,45002 | 0,211247 | 0,62707  | 0,11169  | 0,153066 | -0,00568 | -0,80294 | 0,23012  | -0,25369 | 0,138094 | -0,38936 |
| 0,124061 | 0,107186 | -0,23958 | -1,29517 | -1,26786 | 0,683236 | 0,556298 | 0,097191 | 0,193164 | -0,00978 | -0,76572 | 0,216479 | -0,29942 | 0,207626 | -0,26233 |
| 0,277998 | 0,020039 | -0,05078 | -1,105   | -1,44445 | 0,131507 | 0,426884 | 0,177861 | 0,171531 | 0,143163 | -0,74175 | 0,298399 | -0,18956 | 0,224273 | -0,46983 |
| 0,233902 | 0,069856 | -0,20641 | -1,26943 | -1,52388 | 0,052402 | 0,787915 | 0,020545 | 0,214988 | 0,192367 | -0,66103 | 0,205991 | -0,21084 | 0,205808 | -0,399   |
| 0,071508 | 0,069603 | -0,06611 | -0,67066 | -0,94883 | 0,228136 | 0,550461 | 0,427323 | 0,358975 | -0,10331 | -0,71359 | 0,51704  | -0,21566 | -0,01503 | -0,29425 |
| 0,324157 | 0,057292 | -0,19116 | -1,15956 | -1,77925 | 0,119303 | 0,613478 | -0,00157 | 0,365215 | -0,05995 | -0,83598 | 0,258646 | -0,08289 | 0,205075 | -0,45598 |
| 0,222858 | -0,06173 | -0,00924 | -0,70318 | -1,53399 | -0,38054 | 0,7645   | 0,013524 | 0,211541 | -0,00032 | -0,75042 | 0,345855 | -0,28872 | 0,150643 | -0,28648 |
| 0,170636 | -0,01157 | -0,14942 | -1,45767 | -1,05292 | 0,373552 | 0,402372 | 0,006168 | 0,235856 | 0,036866 | -0,69305 | 0,399444 | -0,26106 | 0,198052 | -0,32193 |
| 0,274895 | -0,20031 | -0,15948 | -1,40094 | -1,284   | 0,519248 | 0,701555 | 0,096216 | 0,256263 | -0,15178 | -0,69797 | 0,298081 | -0,27161 | 0,150271 | -0,30622 |
| -0,10894 | 0,293519 | -0,34368 | -1,69147 | -1,18699 | 0,836188 | 0,607054 | 0,017746 | 0,104932 | 0,260206 | -0,76384 | 0,263821 | -0,34304 | 0,191289 | -0,20342 |
| 0,283752 | 0,127528 | 0,025658 | -0,60945 | -1,66983 | -0,67246 | 0,431565 | 0,009591 | 0,479383 | 0,058638 | -0,54641 | 0,371922 | -0,00713 | 0,17492  | -0,33897 |
| 0,006331 | -0,09248 | 0,056608 | -1,22675 | -1,5712  | -0,41022 | 0,388656 | 0,188068 | 0,121144 | 0,094638 | -0,4876  | 0,215793 | -0,0415  | 0,116367 | -0,2701  |
| -0,03185 | 0,063232 | -0,06389 | -1,46638 | -1,25237 | 0,254897 | 0,533623 | 0,324517 | 0,165772 | 0,017747 | -0,80186 | 0,397067 | -0,1693  | 0,194876 | -0,39746 |
| 0,186116 | 0,047579 | -0,13445 | -1,26132 | -1,70851 | -0,19002 | 0,668733 | -0,08964 | 0,042738 | 0,046815 | -0,72413 | 0,30396  | -0,10659 | 0,131339 | -0,38604 |
| 0,154892 | 0,143186 | 0,227071 | -1,62855 | -1,17258 | 0,52495  | 0,49253  | 0,151365 | 0,117383 | 0,04103  | -0,71447 | 0,374699 | -0,0767  | 0,197246 | -0,41016 |
| 0,106886 | 0,045076 | -0,1413  | -0,94514 | -0,94904 | 0,551474 | 0,589771 | 0,227176 | 0,29489  | -0,00961 | -0,71162 | 0,355497 | -0,23504 | 0,056275 | -0,24876 |
| 0,142996 | 0,037353 | -0,14162 | -0,8583  | -1,61324 | -0,06633 | 0,600804 | 0,321261 | 0,404827 | -0,1487  | -0,58528 | 0,427661 | -0,32628 | 0,222466 | -0,38444 |
| 0,299875 | -0,04564 | -0,12575 | -0,76189 | -1,47362 | -0,06246 | 0,594892 | 0,194445 | 0,264891 | -0,20908 | -0,7529  | 0,483646 | -0,27588 | 0,290213 | -0,39064 |
| 0,1059   | 0,337653 | -0,4889  | -1,60622 | -1,31656 | 0,536067 | 0,582479 | 0,209026 | 0,215338 | 0,154734 | -0,81136 | 0,385478 | -0,45332 | 0,232603 | -0,19107 |
| 0,280414 | -0,14108 | -0,04702 | -1,07577 | -1,27755 | 0,168009 | 0,480401 | 0,17291  | 0,347789 | -0,17494 | -0,53785 | 0,383849 | -0,33384 | 0,13568  | -0,34298 |
| 0,092904 | 0,049779 | -0,10471 | -0,85936 | -1,4157  | 0,014401 | 0,578463 | 0,395199 | 0,329076 | -0,17723 | -0,67553 | 0,517607 | -0,40216 | 0,09286  | -0,18481 |
| 0,170781 | -0,01482 | -0,01245 | -1,11373 | -1,33211 | 0,003368 | 0,4785   | 0,353835 | 0,357407 | -0,13959 | -0,62523 | 0,48338  | -0,3958  | 0,149881 | -0,30617 |
| 0,159936 | -0,04046 | -0,19238 | -1,93307 | -1,12389 | 0,834691 | 0,6048   | 0,224625 | 0,313199 | -0,10384 | -0,83692 | 0,473968 | -0,38033 | 0,215689 | -0,45432 |
| 0,26669  | -0,22373 | -0,21132 | -1,16769 | -1,42092 | 0,165029 | 0,653412 | 0,167041 | 0,420514 | -0,23957 | -0,63433 | 0,534201 | -0,33737 | 0,079754 | -0,31012 |
| 0,182031 | -0,01233 | -0,12405 | -1,1236  | -1,12538 | -0,24287 | 0,410231 | 0,545079 | 0,501446 | 0,000442 | -0,58914 | 0,304293 | -0,37814 | 0,256574 | -0,22198 |
| 0,121773 | 0,054291 | -0,20831 | -1,05464 | -1,33987 | 0,277285 | 0,515165 | 0,25781  | 0,368884 | -0,09236 | -0,59639 | 0,313378 | -0,37996 | 0,220638 | -0,2045  |
| 0,195286 | 0,042418 | -0,21842 | -1,27813 | -2,29801 | -0,87004 | 0,660379 | 0,111453 | 0,525175 | -0,03337 | -0,79022 | 0,345496 | -0,08666 | 0,147928 | -0,45751 |



| Mor25v   | Mor26v   | Mor27v   | Mor28v   | Mor29v   | Mor31v   | Mor18e   | Mor19e   | Mor26e   | Mor31e   | Mor08p   | Mor09p   | Mor10p   | Mor13p   | Mor20p   |
|----------|----------|----------|----------|----------|----------|----------|----------|----------|----------|----------|----------|----------|----------|----------|
| 0,316311 | -0,03045 | -0,06013 | 0,015647 | 0,01198  | 0,143872 | -1,37442 | 0,781417 | 0,121649 | 0,577156 | -0,49603 | -0,73602 | 0,033454 | -0,50292 | 0,51664  |
| 0,362757 | 0,052451 | 0,018509 | -0,00917 | -0,0136  | 0,166549 | -1,30433 | 0,800809 | 0,30707  | 0,742345 | -0,45166 | -0,72439 | 0,034343 | -0,51042 | 0,548897 |
| 0,324672 | -0,01813 | -0,07416 | 0,111551 | -0,04149 | 0,09281  | -1,11125 | 0,778562 | 0,219948 | 0,508458 | -0,35551 | -0,83186 | 0,095335 | -0,71201 | 0,354903 |
| 0,423293 | 0,004355 | 0,027133 | -0,06373 | 0,008134 | 0,121335 | -1,41654 | 0,634704 | 0,285076 | 0,525166 | -0,4462  | -0,71615 | 0,058351 | -0,55705 | 0,570773 |
| 0,306291 | 0,06087  | 0,014568 | 0,005477 | -0,05378 | 0,141443 | -1,26075 | 0,578871 | 0,352669 | 0,559697 | -0,49281 | -0,70978 | -0,0554  | -0,42573 | 0,582879 |
| 0,317994 | 0,067515 | -0,1329  | 0,027967 | -0,07987 | 0,094832 | -1,22656 | 0,765451 | 0,468843 | 0,424352 | -0,41038 | -0,67042 | 0,146785 | -0,4763  | 0,539578 |
| 0,280857 | 0,077794 | -0,18395 | 0,02528  | -0,01186 | 0,098803 | -1,09436 | 0,336577 | 0,22958  | 0,494098 | -0,44087 | -0,80569 | 0,155601 | -0,55434 | 0,384314 |
| 0,246553 | -0,03461 | -0,0624  | 0,001145 | -0,04964 | 0,137807 | -1,41027 | 1,149548 | 0,146361 | 0,62707  | -0,32522 | -0,78031 | -0,01639 | -0,38348 | 0,377071 |
| 0,358453 | 0,069108 | -0,02191 | -0,06177 | -0,09121 | 0,145772 | -1,54011 | 0,542546 | 0,371471 | 0,491825 | -0,4483  | -1,14865 | 0,222444 | -0,54758 | 0,384263 |
| 0,27659  | -0,05693 | -0,11555 | 0,026444 | 0,005042 | 0,025878 | -1,32268 | 0,826508 | 0,018278 | 0,376848 | -0,58837 | -0,77552 | 0,289508 | -0,53453 | 0,46767  |
| 0,313545 | -0,10781 | -0,05135 | -0,01855 | -0,01051 | 0,035375 | -1,173   | 0,815762 | -0,05242 | 0,348297 | -0,50716 | -0,86662 | 0,088383 | -0,56231 | 0,481157 |
| 0,282221 | 0,092832 | -0,09156 | -0,00606 | 0,008149 | 0,050279 | -1,04939 | 0,570225 | 0,353891 | 0,301456 | -0,68353 | -0,85819 | 0,260351 | -0,56022 | 0,518842 |
| 0,233296 | 0,064755 | -0,05852 | -0,00925 | 0,080754 | 0,177707 | -1,34187 | 0,64548  | 0,32789  | 0,588325 | -0,46112 | -0,45584 | -0,01532 | -0,40479 | 0,549406 |
| 0,173317 | 0,138414 | -0,03662 | -0,18113 | -0,17927 | 0,158381 | -1,0507  | 0,669625 | 0,231811 | 0,430156 | 0,06271  | -0,961   | 0,040091 | -0,27532 | 0,036988 |
| 0,122146 | 0,050402 | -0,0921  | -0,06624 | -0,03896 | 0,027849 | -0,87902 | 0,503817 | 0,193381 | 0,291568 | -0,53636 | -0,17467 | 0,056875 | -0,29678 | 0,156825 |
| 0,297382 | 0,018553 | -0,0649  | -0,00665 | -0,05535 | 0,165137 | -1,54752 | 0,885188 | 0,330456 | 0,703018 | -0,47806 | -0,72363 | 0,123946 | -0,40592 | 0,511176 |
| 0,268706 | 0,057956 | -0,10119 | -0,009   | 0,007863 | 0,111444 | -1,20042 | 0,553342 | 0,191377 | 0,468211 | -0,49357 | -0,71778 | 0,132808 | -0,5483  | 0,481091 |
| 0,271069 | -0,03629 | -0,08691 | 0,087756 | -0,06235 | 0,157585 | -1,27594 | 0,864779 | 0,214057 | 0,627902 | -0,05329 | -0,78964 | 0,196665 | -0,56171 | 0,353008 |
| 0,230207 | 0,044997 | -0,05421 | 0,068753 | 0,033841 | 0,149894 | -1,20626 | 0,803904 | 0,234863 | 0,537316 | -0,35938 | -0,66251 | -0,05116 | -0,31949 | 0,3858   |
| 0,232056 | 0,11033  | -0,06206 | 0,011551 | -0,06009 | 0,130043 | -1,01926 | 0,973268 | 0,421308 | 0,562108 | -0,61549 | -0,47946 | -0,11044 | -0,26006 | 0,48942  |
| 0,405824 | 0,047669 | -0,09745 | -0,06312 | -0,0705  | 0,078753 | -1,39909 | 0,997446 | 0,412086 | 0,38137  | -0,46454 | -0,53684 | -0,0367  | -0,61484 | 0,513525 |
| 0,261898 | 0,0415   | -0,07499 | -0,11718 | 0,018506 | 0,22062  | -1,60476 | 0,945936 | 0,237162 | 0,648336 | -0,52056 | -0,52097 | -0,17719 | -0,45305 | 0,514327 |
| 0,304502 | -0,09099 | -0,0142  | 0,019706 | -0,07406 | 0,101675 | -0,72523 | 0,646364 | -0,06114 | 0,4336   | -0,49493 | -0,62931 | -0,05274 | -0,46493 | 0,394143 |
| 0,216571 | 0,100645 | 0,026785 | -0,04522 | -0,06271 | 0,216094 | -1,25329 | 1,003312 | 0,359192 | 0,797827 | -0,44627 | -0,4157  | -0,07896 | -0,40824 | 0,568146 |
| 0,211009 | 0,074589 | -0,0126  | -0,04933 | -0,05588 | 0,152395 | -1,08487 | 0,779092 | 0,269058 | 0,587911 | -0,67057 | -0,5763  | -0,06698 | -0,35295 | 0,653191 |
| 0,462843 | 0,011471 | -0,16549 | -0,03158 | -0,06146 | 0,119881 | -1,41063 | 1,00291  | 0,314496 | 0,742314 | -0,63102 | -1,13898 | 0,457566 | -0,78071 | 0,772338 |
| 0,255521 | 0,088921 | -0,04801 | -0,02435 | 0,03342  | 0,047335 | -1,13893 | 1,088194 | 0,216009 | 0,286531 | -0,73738 | -0,51756 | 0,000942 | -0,44462 | 0,533608 |
| 0,206598 | 0,122222 | -0,0852  | 0,010382 | -0,05038 | 0,133974 | -1,04103 | 0,689008 | 0,285656 | 0,570579 | -0,35457 | -0,91398 | 0,477493 | -0,41839 | 0,718052 |
| 0,23617  | 0,005209 | 0,020633 | -0,07731 | -0,02209 | 0,101701 | -1,0118  | 0,72525  | 0,170876 | 0,415803 | -0,55375 | -0,49742 | -0,10657 | -0,22333 | 0,627523 |
| 0,33115  | 0,041401 | 0,016982 | -0,14379 | -0,21407 | 0,169513 | -1,67433 | 0,815783 | 0,220998 | 0,443952 | -0,42502 | -1,00703 | 0,255869 | -0,56361 | 0,451276 |

| Mor24p   | Mor30p   | Mor32p   | Mor03s   | Mor04s   | Mor05s   | Mor06s   | Mor08s   | Mor09s   | Mor10s   | Mor11s   | Mor12s   | Mor13s   | Mor14s   | Mor15s   |
|----------|----------|----------|----------|----------|----------|----------|----------|----------|----------|----------|----------|----------|----------|----------|
| -0,03895 | -0,03601 | -0,14856 | -15,3781 | -2,99648 | -15,9323 | -5,99354 | -0,13045 | -7,77133 | -2,15347 | 1,715568 | 1,279763 | -1,00533 | -0,77028 | -0,82403 |
| -0,06966 | -0,10927 | -0,1043  | -13,926  | -3,26124 | -14,9444 | -4,66148 | 0,001626 | -8,21246 | -1,39155 | 1,63304  | 0,783967 | -0,86404 | 0,218441 | -1,55362 |
| -0,06439 | -0,00806 | -0,11114 | -15,2091 | -2,21744 | -14,4911 | -3,90327 | -0,30776 | -7,92238 | -1,73988 | 2,335002 | 1,254149 | -0,45869 | -1,12663 | -0,95504 |
| -0,09686 | 0,028868 | -0,08882 | -13,3946 | -6,27317 | -17,1999 | -5,11255 | 1,075588 | -8,71335 | -2,15788 | 3,673577 | 1,179075 | -0,62759 | -1,7182  | -0,33329 |
| -0,00998 | -0,02444 | -0,12962 | -15,1682 | -2,75122 | -15,6505 | -1,95599 | 0,042631 | -7,43619 | -2,62303 | 1,698297 | 0,272678 | 1,22343  | -1,62594 | -0,78615 |
| 0,005746 | 0,092277 | -0,00132 | -16,5076 | -3,13093 | -19,8923 | -6,34933 | 0,71927  | -7,28686 | -2,73248 | 3,188212 | 0,890087 | 0,436191 | -1,213   | -0,57167 |
| -0,00796 | 0,007465 | -0,05467 | -17,4262 | -5,05779 | -9,80122 | -6,37158 | 0,365905 | -10,0559 | 2,324308 | 6,228308 | 1,340921 | -0,60548 | -2,56216 | 2,156855 |
| -0,08167 | -0,0465  | -0,07113 | -7,07635 | -0,15083 | -14,2274 | -5,75197 | 2,829235 | -10,6755 | -0,71158 | 2,675198 | -1,75393 | 1,65705  | 0,405158 | -2,72899 |
| -0,04662 | 0,06209  | -0,1454  | -17,132  | -6,83749 | -16,583  | -5,06507 | -0,62617 | -11,5673 | -0,5913  | 3,950493 | 0,667994 | -0,59877 | -1,74092 | -1,77899 |
| 0,024021 | 0,05484  | -0,00677 | -5,78364 | -4,45082 | -12,4296 | -16,9906 | 1,217268 | -10,7912 | 3,871312 | 3,860202 | -0,70297 | 1,750805 | -2,22743 | -4,26738 |
| -0,04664 | 0,029509 | -0,04541 | -25,9289 | 0,436021 | -7,35966 | -9,67082 | 5,076925 | -11,036  | 2,834393 | 0,643807 | 3,448146 | 2,47026  | -2,19657 | -0,84986 |
| 0,014237 | -0,01615 | -0,08156 | -52,4513 | 11,22928 | -9,00917 | -26,379  | -1,1025  | -18,4221 | 11,73911 | 0,433726 | -2,26247 | 4,713192 | -5,94002 | 0,601406 |
| 0,000109 | -0,0832  | -0,11111 | -18,0659 | -3,77855 | -14,8362 | -0,9217  | 1,53239  | -5,98805 | -2,30751 | 1,266454 | 2,120764 | 0,6518   | -2,72134 | -0,67013 |
| -0,0587  | 0,125592 | 0,001534 | -15,8901 | -5,96537 | -7,23907 | -10,0727 | 2,08591  | -11,8521 | 1,345171 | 2,168003 | 0,476002 | -0,19666 | -2,50554 | -1,97002 |
| 0,060025 | -0,07078 | 0,050404 | -15,8661 | -5,23137 | -7,59003 | -9,47344 | -0,71065 | -7,15575 | 0,541278 | 2,000901 | -0,51128 | 1,18607  | -1,26931 | -2,37108 |
| -0,048   | -0,11653 | -0,02966 | -17,4353 | -3,5807  | -15,3421 | -5,29253 | 0,820511 | -9,05696 | -0,78363 | 0,633376 | 2,095221 | -0,35003 | -0,18512 | -4,01659 |
| 0,010244 | 0,014205 | -0,06543 | -16,7633 | -6,70418 | -14,6282 | -7,90184 | -2,57529 | -12,8948 | 0,068242 | 3,690285 | 2,963584 | -0,49117 | -3,80493 | -1,06494 |
| 0,002031 | -0,04934 | 0,004551 | -17,5948 | -2,69803 | -16,578  | -3,91298 | 3,149746 | -7,94906 | -1,00249 | 1,878128 | 2,833309 | -1,33847 | -1,10493 | -1,34049 |
| 0,012171 | -0,02652 | -0,10505 | -7,8993  | 0,752083 | -13,6607 | -1,22248 | 3,667082 | -7,22846 | 0,36057  | 4,32232  | 0,46052  | 1,947282 | -0,32336 | -1,28148 |
| -0,04387 | 0,031185 | -0,07821 | -9,47951 | -5,9776  | -15,3517 | -4,29148 | -2,91806 | -3,74917 | -0,54233 | 2,971265 | -0,72488 | 3,608876 | -0,79281 | -3,61065 |
| 0,003152 | 0,096092 | -0,0471  | -12,0673 | -1,00767 | -15,2484 | -6,51074 | -0,31884 | -4,94564 | -2,38653 | 4,036278 | 0,393229 | -1,14231 | -0,70869 | -0,01681 |
| -0,00088 | 0,018417 | -0,20766 | -13,844  | 2,235985 | -16,6557 | -5,01049 | 1,800188 | -6,89978 | -2,21583 | 2,271115 | -0,06333 | -1,00886 | 1,158441 | 0,223583 |
| -0,08764 | 0,053491 | -0,04959 | -8,9931  | -4,81645 | -16,1546 | -5,61196 | -3,87448 | -5,259   | -0,97539 | 2,464812 | 0,810408 | 3,938146 | -0,91303 | -2,48654 |
| -0,09765 | -0,05651 | -0,1149  | -8,94809 | -0,97208 | -18,3295 | -5,63418 | -1,63011 | -4,28009 | -0,40699 | 0,678087 | -1,85113 | 0,942203 | 0,834296 | -2,84904 |
| -0,10614 | -0,04245 | -0,00953 | -9,05011 | -4,82801 | -18,3704 | -8,04732 | -4,73331 | -5,46531 | -2,52364 | 1,658911 | -1,77782 | 3,118863 | 0,032306 | -2,19966 |
| 0,014447 | 0,044233 | -0,11069 | -21,8803 | -1,92919 | -22,117  | -5,01409 | 3,001408 | -10,614  | 2,394275 | 3,139058 | 2,574605 | -1,21352 | -1,39758 | -0,73599 |
| 0,03354  | -0,02158 | -0,08887 | -44,2227 | 12,15957 | -10,0772 | -21,7884 | -5,7387  | -12,9545 | 10,95426 | -1,8203  | -1,31469 | 6,889357 | -8,2369  | 3,191579 |
| -0,04048 | 0,00921  | -0,06934 | -10,6734 | -4,14884 | -15,3325 | -8,92822 | 0,177765 | -9,56388 | 0,816297 | 2,562326 | -0,32877 | 1,139792 | 0,728336 | -2,46571 |
| -0,05369 | 0,005259 | -0,07323 | -9,3714  | -1,75459 | -16,1547 | -4,35725 | -1,01821 | -6,09869 | 0,25672  | 3,747296 | -1,77866 | 3,741714 | 0,119614 | -4,36125 |
| 0,012251 | -0,01093 | -0,08246 | -16,6501 | -0,99214 | -14,3117 | -14,7782 | 2,897149 | -11,5629 | 1,134307 | 4,593669 | 1,856042 | 0,817886 | -2,26651 | 0,126458 |

| Mor16s   | Mor17s   | Mor18s   | Mor19s   | Mor20s   | Mor21s   | Mor22s   | Mor23s   | Mor24s   | Mor25s   | Mor26s   | Mor27s   | Mor28s   | Mor29s   | Mor30s   |
|----------|----------|----------|----------|----------|----------|----------|----------|----------|----------|----------|----------|----------|----------|----------|
| 2,940478 | -0,87941 | -4,57355 | 2,384003 | 0,776681 | 0,392142 | 1,753654 | -2,26531 | -0,78697 | 1,530501 | -0,32566 | 0,879632 | -0,55324 | -0,58338 | 1,155668 |
| 2,961485 | 0,132434 | -4,60033 | 2,371203 | 1,375848 | 0,699509 | 0,76925  | -2,17187 | -0,8421  | 3,207791 | 0,225567 | 1,242896 | -0,13106 | -0,73625 | 0,218995 |
| 2,770666 | -0,92855 | -3,55654 | 2,397156 | 0,399065 | 0,231309 | 2,720201 | -2,99282 | -1,16602 | 1,605645 | 0,768901 | 0,51421  | 0,253362 | -0,45773 | 0,472121 |
| 2,127065 | -0,01829 | -5,5493  | 1,354852 | 2,389722 | -0,58883 | 1,909759 | -2,9357  | -0,49786 | 2,329084 | 0,238046 | 1,12316  | -0,89797 | -0,42111 | 1,347006 |
| 2,151509 | -0,52106 | -4,59576 | 0,795123 | 1,271984 | -1,05661 | 2,986878 | -2,06331 | -0,00138 | 1,176015 | 0,923563 | 1,386323 | -0,71357 | -1,34866 | 1,23768  |
| 2,151196 | -0,08995 | -3,56677 | 1,142213 | 1,074619 | 0,332079 | 3,349073 | -4,35532 | 0,500119 | 1,353233 | 1,04762  | 0,089661 | -0,19299 | -0,70359 | 2,138687 |
| 3,415074 | 0,118921 | -3,708   | -0,98564 | 1,110681 | 0,716489 | 2,303596 | -4,88125 | -1,22066 | 2,56508  | -0,28782 | -0,8603  | 0,120443 | -0,88599 | 2,145671 |
| 5,650275 | -0,80191 | -4,11632 | 2,955896 | -0,54903 | -0,30297 | 0,784113 | -3,17826 | -0,53826 | 2,151771 | -0,56814 | 0,522606 | 0,067862 | -1,00346 | 0,369265 |
| 3,836257 | -1,11716 | -4,81455 | 0,617823 | 0,29926  | 0,517374 | 2,997482 | -4,38862 | -0,18519 | 1,756615 | 0,551391 | 1,043032 | -1,33608 | -0,95722 | 2,170557 |
| 4,849401 | 0,548484 | -5,06861 | 4,070192 | -0,2577  | -2,32566 | 4,310775 | -3,16794 | 0,223023 | 1,93528  | -0,73175 | -0,43958 | -0,46381 | -0,86211 | 1,462319 |
| 6,329629 | 1,366945 | -3,84813 | 3,133992 | 0,039148 | -0,07746 | 4,928005 | -4,71934 | 0,807067 | 3,130189 | -2,27968 | 0,895757 | -0,53618 | -1,81887 | 0,80835  |
| 6,364111 | -6,64119 | -0,33965 | 2,012074 | -0,6154  | 2,850943 | 1,605118 | -5,39505 | 3,167768 | 0,077336 | 0,591551 | 2,165784 | -2,64876 | -0,07376 | 3,40124  |
| 1,662536 | 1,944479 | -6,00245 | 2,445499 | 1,881737 | -1,11209 | 1,697341 | -1,89484 | 0,102694 | 1,443474 | 0,555973 | 0,623596 | -0,13443 | -0,27913 | -0,20216 |
| 5,561459 | 0,816875 | -3,04052 | 1,468742 | -1,90956 | 1,545301 | 2,117104 | -3,23059 | -0,51765 | 1,885206 | -0,02106 | 0,853544 | -1,44063 | -2,25155 | 1,937982 |
| 4,509741 | -0,11658 | -3,13543 | 0,846765 | -0,75673 | 0,96668  | 1,502514 | -2,93207 | -0,84332 | 1,493718 | -0,13502 | 0,752154 | -1,44524 | -1,22408 | 1,02267  |
| 2,761245 | 0,340525 | -5,4696  | 2,590392 | 0,89989  | 1,199088 | 2,086909 | -3,60739 | -0,73848 | 2,831554 | -0,24353 | 0,47272  | -0,7887  | -1,9341  | -0,08754 |
| 0,527766 | -1,23155 | -3,57776 | 1,272601 | 0,837452 | 2,180262 | 1,925144 | -4,98433 | -1,16341 | 2,189585 | 0,151392 | 1,158149 | -0,49655 | -0,66692 | 1,155608 |
| 2,009994 | -0,29129 | -4,68532 | 3,236756 | 0,393927 | 0,935864 | 2,074814 | -2,85986 | 0,240816 | 1,285373 | -0,13584 | 0,539654 | 0,620653 | -0,79739 | 0,816052 |
| 4,144924 | 0,239247 | -3,68674 | 1,998604 | -0,72787 | 0,571304 | 1,333726 | -3,26635 | 0,279614 | 1,85411  | -0,10624 | 0,75991  | 0,102711 | -0,34633 | 1,261825 |
| 4,627873 | -3,37174 | -1,48778 | 1,633469 | 0,764024 | -1,00827 | 3,401615 | -4,55157 | 0,590638 | 1,493035 | 0,545982 | 1,321305 | -0,72499 | -1,48183 | 0,495627 |
| 4,884925 | -1,66049 | -4,74678 | 2,104312 | 0,298002 | -0,68019 | 2,041528 | -2,9355  | -0,57309 | 3,448185 | 0,077206 | -0,80527 | -0,03144 | -1,76313 | 2,246398 |
| 2,908935 | 0,644835 | -5,87528 | 2,968029 | 0,020004 | -1,01315 | 2,055019 | -2,51385 | -0,58118 | 2,262138 | -0,01506 | 0,539109 | -1,59792 | -1,27489 | 1,544782 |
| 5,994341 | -3,23276 | -1,52523 | 1,14683  | 0,970614 | -2,07798 | 1,732592 | -3,12502 | -1,00543 | 2,545341 | -1,18325 | 1,23754  | 0,17777  | -1,00042 | 1,985154 |
| 5,342978 | -1,89842 | -2,15593 | 1,825045 | 1,732656 | -1,96658 | 1,201533 | -1,7039  | -0,66278 | 0,980194 | 0,419369 | 1,430342 | -1,22905 | -0,95929 | 1,157228 |
| 6,567442 | -2,03575 | -2,6358  | 1,681616 | 2,651882 | -1,90453 | 2,100439 | -3,12859 | -1,3391  | 1,677118 | -0,54852 | 1,044955 | -0,66262 | -1,22823 | 1,537388 |
| 3,962533 | -1,51675 | -3,62872 | 1,847666 | 1,34145  | -1,03385 | 2,505253 | -3,01643 | -0,052   | 3,190169 | 0,436242 | 0,47755  | -1,14211 | -0,94007 | 0,951469 |
| 8,442026 | -7,89572 | -0,44521 | 3,421517 | 0,384609 | 1,047309 | 0,4114   | -6,89145 | 4,513534 | 1,438531 | -1,28634 | 4,235236 | -4,01874 | 0,45461  | 3,631381 |
| 5,652159 | -0,07648 | -2,71192 | 0,797411 | 0,331184 | -0,35536 | 2,819182 | -2,38001 | -0,42103 | 1,532178 | 0,473442 | -0,05541 | -0,45995 | -1,17833 | 0,649575 |
| 5,527785 | -1,59844 | -2,91504 | 0,439892 | 1,903134 | -1,28458 | 2,037412 | -2,02199 | -0,3101  | 2,059598 | -0,4361  | 1,854328 | -0,99392 | -1,32479 | 1,135315 |
| 7,001691 | 0,803709 | -5,1452  | 1,358175 | 1,553784 | 1,206597 | 2,029104 | -4,05826 | -1,06571 | 2,25833  | -0,49827 | 1,086281 | -0,66012 | -2,39628 | 1,673096 |

| Mor31s   | Mor32s   | P1u      | P2u      | G1u      | G2u      | G3u      | E1u      | E2u      | E3u      | L2m      | G1m      | G2m      | G3m      | E2m      |
|----------|----------|----------|----------|----------|----------|----------|----------|----------|----------|----------|----------|----------|----------|----------|
| 0,637326 | -1,496   | 0,804493 | 0,154837 | 0,223323 | 0,177184 | 0,177184 | 0,634069 | 0,493222 | 0,417791 | 2,007546 | 0,177184 | 0,177184 | 0,177184 | 0,497179 |
| 1,198919 | -0,78453 | 0,838618 | 0,131249 | 0,172195 | 0,211885 | 0,232505 | 0,621437 | 0,473693 | 0,361227 | 2,122063 | 0,172195 | 0,172195 | 0,172195 | 0,559512 |
| 0,541235 | -1,5606  | 0,808117 | 0,162709 | 0,177184 | 0,177184 | 0,247819 | 0,59213  | 0,509258 | 0,283047 | 1,87985  | 0,177184 | 0,189669 | 0,200769 | 0,359909 |
| 0,818007 | -1,98972 | 0,834263 | 0,131057 | 0,170707 | 0,208607 | 0,181063 | 0,606179 | 0,466789 | 0,363251 | 2,208421 | 0,170707 | 0,190227 | 0,199329 | 0,537942 |
| 0,914029 | -1,32033 | 0,80705  | 0,157377 | 0,223323 | 0,177184 | 0,223323 | 0,602077 | 0,501606 | 0,366779 | 2,055324 | 0,177184 | 0,30698  | 0,177184 | 0,532494 |
| 0,368626 | -0,13171 | 0,847735 | 0,10663  | 0,170707 | 0,170707 | 0,208607 | 0,602106 | 0,462889 | 0,576698 | 1,708965 | 0,190227 | 0,170707 | 0,170707 | 0,477071 |
| 1,145725 | -1,97136 | 0,798576 | 0,130451 | 0,177184 | 0,177184 | 0,223323 | 0,631534 | 0,553106 | 0,415099 | 1,804692 | 0,177184 | 0,177184 | 0,177184 | 0,640045 |
| 1,011396 | -0,6061  | 0,787494 | 0,16111  | 0,192603 | 0,192603 | 0,192603 | 0,638877 | 0,422561 | 0,220056 | 1,365282 | 0,172195 | 0,192603 | 0,172195 | 0,172709 |
| 0,511087 | -0,9161  | 0,85253  | 0,112434 | 0,211885 | 0,192603 | 0,243575 | 0,594762 | 0,439948 | 0,394603 | 1,824656 | 0,172195 | 0,211885 | 0,192603 | 0,492721 |
| 0,555661 | -1,16231 | 0,860993 | 0,099121 | 0,19514  | 0,19514  | 0,19514  | 0,605901 | 0,450518 | 0,289762 | 1,290979 | 0,19514  | 0,173765 | 0,173765 | 0,46014  |
| 1,18591  | -1,67948 | 0,768814 | 0,186533 | 0,173765 | 0,173765 | 0,261365 | 0,663824 | 0,483781 | 0,246828 | 2,693554 | 0,173765 | 0,173765 | 0,173765 | 0,57713  |
| -3,36767 | -0,00671 | 0,837817 | 0,130351 | 0,172195 | 0,202142 | 0,255269 | 0,612336 | 0,484761 | 0,385195 | 2,033251 | 0,172195 | 0,211885 | 0,211885 | 0,517592 |
| 1,079473 | -1,05804 | 0,797116 | 0,145552 | 0,200769 | 0,200769 | 0,177184 | 0,600388 | 0,503727 | 0,520148 | 1,95967  | 0,177184 | 0,211886 | 0,200769 | 0,560561 |
| 0,666245 | 0,205091 | 0,809772 | 0,139279 | 0,238013 | 0,183169 | 0,183169 | 0,635378 | 0,494876 | 0,471445 | 1,705171 | 0,183169 | 0,210991 | 0,238013 | 0,484937 |
| 0,338218 | 0,269292 | 0,81063  | 0,13029  | 0,183169 | 0,210991 | 0,210991 | 0,625463 | 0,477408 | 0,48731  | 1,715387 | 0,210991 | 0,183169 | 0,183169 | 0,535001 |
| 1,002049 | -0,78853 | 0,810643 | 0,137343 | 0,192603 | 0,172195 | 0,221972 | 0,642031 | 0,492487 | 0,472001 | 1,905255 | 0,172195 | 0,192603 | 0,172195 | 0,48135  |
| 0,538076 | -1,39569 | 0,797973 | 0,124668 | 0,177184 | 0,200769 | 0,223323 | 0,641608 | 0,57084  | 0,449968 | 1,667708 | 0,177184 | 0,200769 | 0,177184 | 0,528247 |
| 1,16863  | -0,4987  | 0,796907 | 0,149568 | 0,177184 | 0,177184 | 0,247819 | 0,622595 | 0,505328 | 0,501684 | 1,503515 | 0,200769 | 0,177184 | 0,200769 | 0,219797 |
| 0,199589 | -1,15072 | 0,827349 | 0,11547  | 0,177184 | 0,177184 | 0,344052 | 0,645537 | 0,380748 | 0,235678 | 1,856488 | 0,177184 | 0,177184 | 0,211886 | 0,441941 |
| 0,936206 | -1,05921 | 0,786536 | 0,141307 | 0,192603 | 0,183017 | 0,202142 | 0,597006 | 0,438397 | 0,413766 | 2,007815 | 0,192603 | 0,192603 | 0,202142 | 0,591036 |
| -0,39818 | -0,50041 | 0,821125 | 0,129745 | 0,183908 | 0,166667 | 0,2      | 0,579598 | 0,444317 | 0,420914 | 2,249992 | 0,183908 | 0,166667 | 0,2      | 0,557541 |
| 1,585873 | -2,69769 | 0,773907 | 0,166337 | 0,192603 | 0,211885 | 0,192603 | 0,574592 | 0,487029 | 0,516491 | 2,405906 | 0,172195 | 0,172195 | 0,172195 | 0,555609 |
| -0,45617 | -0,04178 | 0,792755 | 0,137322 | 0,172195 | 0,172195 | 0,211885 | 0,559866 | 0,4437   | 0,415086 | 1,722261 | 0,172195 | 0,192603 | 0,172195 | 0,370755 |
| 0,402736 | -0,43574 | 0,823821 | 0,124724 | 0,185892 | 0,239729 | 0,239729 | 0,593695 | 0,422937 | 0,380122 | 2,174166 | 0,167949 | 0,185892 | 0,202685 | 0,618004 |
| -0,24162 | -0,08454 | 0,807286 | 0,128335 | 0,167949 | 0,202685 | 0,250133 | 0,631298 | 0,456603 | 0,415005 | 1,943736 | 0,167949 | 0,202685 | 0,185892 | 0,522227 |
| 0,444469 | -1,53397 | 0,813466 | 0,16212  | 0,164272 | 0,164272 | 0,328544 | 0,634589 | 0,413849 | 0,215037 | 1,91361  | 0,164272 | 0,164272 | 0,195095 | 0,177466 |
| -3,86809 | -0,39544 | 0,825155 | 0,118745 | 0,185892 | 0,167949 | 0,239729 | 0,587134 | 0,427476 | 0,419055 | 1,958718 | 0,167949 | 0,202685 | 0,185892 | 0,500697 |
| 0,892632 | -1,32968 | 0,788057 | 0,148364 | 0,192603 | 0,267679 | 0,255269 | 0,546525 | 0,453424 | 0,385231 | 1,647283 | 0,192603 | 0,172195 | 0,172195 | 0,276108 |
| 0,09536  | -0,76464 | 0,788905 | 0,141571 | 0,192603 | 0,172195 | 0,232505 | 0,566371 | 0,448749 | 0,410081 | 1,981645 | 0,172195 | 0,192603 | 0,192603 | 0,539899 |
| -0,12372 | -1,47179 | 0,81182  | 0,116524 | 0,185892 | 0,239729 | 0,202685 | 0,604107 | 0,352583 | 0,409607 | 2,302305 | 0,167949 | 0,211391 | 0,185892 | 0,54578  |

| E3m      | L2v      | L3v      | P1v      | P2v      | G1v      | G2v      | G3v      | E1v      | E2v      | E3v      | G1e      | G2e      | G3e      | E1e      |
|----------|----------|----------|----------|----------|----------|----------|----------|----------|----------|----------|----------|----------|----------|----------|
| 0,079401 | 1,720018 | 0,335445 | 0,809303 | 0,159576 | 0,177184 | 0,177184 | 0,223323 | 0,48088  | 0,399133 | 0,168676 | 0,177184 | 0,200769 | 0,177184 | 0,596848 |
| 0,069606 | 1,788581 | 0,282098 | 0,836017 | 0,141643 | 0,172195 | 0,172195 | 0,221972 | 0,441455 | 0,409667 | 0,14032  | 0,172195 | 0,172195 | 0,192603 | 0,591359 |
| 0,030607 | 1,826155 | 0,218921 | 0,834514 | 0,147771 | 0,200769 | 0,200769 | 0,177184 | 0,592533 | 0,394475 | 0,097345 | 0,177184 | 0,177184 | 0,223323 | 0,579884 |
| 0,068937 | 1,926602 | 0,354257 | 0,832686 | 0,141327 | 0,170707 | 0,190227 | 0,199329 | 0,44203  | 0,415459 | 0,145573 | 0,170707 | 0,170707 | 0,199329 | 0,588519 |
| 0,051165 | 1,771098 | 0,279521 | 0,82931  | 0,147423 | 0,200769 | 0,189669 | 0,223323 | 0,567068 | 0,397247 | 0,131989 | 0,177184 | 0,200769 | 0,200769 | 0,599558 |
| 0,133882 | 1,498578 | 0,589116 | 0,847012 | 0,109817 | 0,170707 | 0,170707 | 0,170707 | 0,424056 | 0,362478 | 0,303884 | 0,170707 | 0,170707 | 0,170707 | 0,579485 |
| 0,082557 | 1,450317 | 0,669686 | 0,814695 | 0,126769 | 0,177184 | 0,177184 | 0,211886 | 0,543065 | 0,414248 | 0,215159 | 0,177184 | 0,177184 | 0,177184 | 0,653655 |
| 0,213519 | 1,604432 | 0,651638 | 0,813635 | 0,132535 | 0,172195 | 0,172195 | 0,172195 | 0,520087 | 0,219349 | 0,201988 | 0,192603 | 0,172195 | 0,192603 | 0,625652 |
| 0,081693 | 1,568073 | 0,360174 | 0,856689 | 0,116542 | 0,172195 | 0,183017 | 0,172195 | 0,451688 | 0,361966 | 0,161435 | 0,192603 | 0,192603 | 0,192603 | 0,585234 |
| 0,192335 | 1,208586 | 0,529674 | 0,879473 | 0,083801 | 0,173765 | 0,185094 | 0,173765 | 0,537669 | 0,303573 | 0,254307 | 0,173765 | 0,288759 | 0,173765 | 0,64932  |
| 0,199741 | 2,306645 | 0,525777 | 0,769054 | 0,188076 | 0,173765 | 0,19514  | 0,173765 | 0,545933 | 0,422507 | 0,239379 | 0,19514  | 0,173765 | 0,173765 | 0,662789 |
| 0,157624 | 1,769095 | 0,326879 | 0,848927 | 0,127512 | 0,172195 | 0,172195 | 0,202142 | 0,525707 | 0,394994 | 0,172209 | 0,172195 | 0,172195 | 0,183017 | 0,671582 |
| 0,211503 | 1,678487 | 0,581357 | 0,823756 | 0,130904 | 0,177184 | 0,177184 | 0,223323 | 0,633869 | 0,411236 | 0,276447 | 0,177184 | 0,177184 | 0,223323 | 0,618084 |
| 0,095463 | 1,463524 | 0,414117 | 0,814785 | 0,144366 | 0,183169 | 0,183169 | 0,197862 | 0,499442 | 0,396781 | 0,21897  | 0,210991 | 0,183169 | 0,183169 | 0,598085 |
| 0,106101 | 1,45436  | 0,533689 | 0,809955 | 0,139028 | 0,183169 | 0,210991 | 0,183169 | 0,478119 | 0,396402 | 0,240816 | 0,183169 | 0,183169 | 0,224248 | 0,587415 |
| 0,09944  | 1,675492 | 0,57043  | 0,815864 | 0,137368 | 0,192603 | 0,172195 | 0,202142 | 0,468867 | 0,368824 | 0,230665 | 0,172195 | 0,183017 | 0,172195 | 0,615141 |
| 0,170722 | 1,401425 | 0,795528 | 0,801671 | 0,126513 | 0,200769 | 0,177184 | 0,211886 | 0,495573 | 0,409571 | 0,246679 | 0,177184 | 0,200769 | 0,177184 | 0,59947  |
| 0,158251 | 1,66701  | 0,569431 | 0,814238 | 0,138465 | 0,177184 | 0,177184 | 0,200769 | 0,584601 | 0,377201 | 0,314169 | 0,177184 | 0,200769 | 0,200769 | 0,602717 |
| 0,291116 | 1,406713 | 0,715939 | 0,821934 | 0,118007 | 0,177184 | 0,177184 | 0,200769 | 0,489605 | 0,302117 | 0,219731 | 0,177184 | 0,223323 | 0,200769 | 0,610021 |
| 0,096059 | 1,625116 | 0,604417 | 0,789481 | 0,153448 | 0,172195 | 0,172195 | 0,183017 | 0,446703 | 0,393063 | 0,190451 | 0,172195 | 0,172195 | 0,172195 | 0,548411 |
| 0,09947  | 1,933384 | 0,528426 | 0,815315 | 0,145043 | 0,166667 | 0,2      | 0,183908 | 0,408068 | 0,409238 | 0,19321  | 0,183908 | 0,191898 | 0,166667 | 0,549187 |
| 0,278049 | 2,071586 | 0,607535 | 0,801073 | 0,153817 | 0,192603 | 0,172195 | 0,211885 | 0,625322 | 0,41332  | 0,283766 | 0,192603 | 0,192603 | 0,202142 | 0,58346  |
| 0,049469 | 1,610733 | 0,570373 | 0,824726 | 0,129439 | 0,172195 | 0,172195 | 0,202142 | 0,574422 | 0,373159 | 0,167955 | 0,172195 | 0,172195 | 0,211885 | 0,540164 |
| 0,080908 | 1,749022 | 0,500678 | 0,817362 | 0,141991 | 0,167949 | 0,185892 | 0,194224 | 0,408659 | 0,395866 | 0,167442 | 0,167949 | 0,167949 | 0,211391 | 0,550339 |
| 0,104169 | 1,649557 | 0,695078 | 0,809407 | 0,134091 | 0,167949 | 0,185892 | 0,239729 | 0,450039 | 0,370397 | 0,218296 | 0,167949 | 0,167949 | 0,194224 | 0,590446 |
| 0,174039 | 2,268056 | 0,349878 | 0,837342 | 0,140919 | 0,180253 | 0,164272 | 0,210612 | 0,541057 | 0,251485 | 0,146583 | 0,180253 | 0,164272 | 0,236228 | 0,638282 |
| 0,133435 | 1,659925 | 0,577695 | 0,837603 | 0,12047  | 0,167949 | 0,167949 | 0,177476 | 0,504819 | 0,369174 | 0,195871 | 0,167949 | 0,185892 | 0,202685 | 0,640493 |
| 0,032601 | 1,745269 | 0,498292 | 0,827133 | 0,134474 | 0,172195 | 0,192603 | 0,221972 | 0,621409 | 0,378455 | 0,147208 | 0,192603 | 0,192603 | 0,211885 | 0,510984 |
| 0,064054 | 1,654311 | 0,559692 | 0,814683 | 0,13847  | 0,172195 | 0,202142 | 0,211885 | 0,543129 | 0,388529 | 0,165816 | 0,172195 | 0,183017 | 0,172195 | 0,554897 |
| 0,100395 | 1,849348 | 0,816954 | 0,810513 | 0,131428 | 0,167949 | 0,202685 | 0,185892 | 0,459094 | 0,342877 | 0,185186 | 0,167949 | 0,239729 | 0,167949 | 0,583713 |

| E2e      | E3e      | P1p      | P2p      | G1p      | G2p      | G3p      | E2p      | G1i      | G2i      | G3i      | E1i      | L2s      | L3s      | P2s      |
|----------|----------|----------|----------|----------|----------|----------|----------|----------|----------|----------|----------|----------|----------|----------|
| 0,560324 | 0,386794 | 0,825245 | 0,140879 | 0,235255 | 0,223323 | 0,200769 | 0,331416 | 0,223323 | 0,177184 | 0,177184 | 0,638724 | 2,378316 | 0,389224 | 0,199098 |
| 0,548968 | 0,33708  | 0,850921 | 0,124335 | 0,172195 | 0,172195 | 0,192603 | 0,332905 | 0,172195 | 0,211885 | 0,172195 | 0,636464 | 2,547347 | 0,344389 | 0,178232 |
| 0,571966 | 0,257366 | 0,856    | 0,125249 | 0,177184 | 0,177184 | 0,247819 | 0,311295 | 0,177184 | 0,200769 | 0,200769 | 0,583145 | 2,613973 | 0,276512 | 0,204923 |
| 0,528721 | 0,320766 | 0,842184 | 0,127892 | 0,170707 | 0,170707 | 0,190227 | 0,352561 | 0,170707 | 0,170707 | 0,199329 | 0,623556 | 2,700437 | 0,379732 | 0,175033 |
| 0,564552 | 0,329262 | 0,845193 | 0,129199 | 0,200769 | 0,189669 | 0,223323 | 0,318856 | 0,223323 | 0,177184 | 0,200769 | 0,603548 | 2,595013 | 0,321192 | 0,194577 |
| 0,495281 | 0,574873 | 0,8558   | 0,101157 | 0,170707 | 0,170707 | 0,190227 | 0,320089 | 0,170707 | 0,190227 | 0,170707 | 0,620106 | 2,028239 | 0,647993 | 0,129208 |
| 0,583533 | 0,47473  | 0,818312 | 0,119373 | 0,189669 | 0,177184 | 0,177184 | 0,364144 | 0,177184 | 0,200769 | 0,200769 | 0,668395 | 2,173238 | 0,723272 | 0,145991 |
| 0,393237 | 0,285042 | 0,812068 | 0,142167 | 0,192603 | 0,183017 | 0,192603 | 0,265722 | 0,172195 | 0,172195 | 0,172195 | 0,645593 | 1,77263  | 1,052884 | 0,124829 |
| 0,491292 | 0,349704 | 0,863711 | 0,10601  | 0,192603 | 0,172195 | 0,202142 | 0,303584 | 0,172195 | 0,172195 | 0,192603 | 0,610501 | 2,222308 | 0,39305  | 0,145019 |
| 0,457734 | 0,379725 | 0,875669 | 0,089881 | 0,173765 | 0,19514  | 0,205155 | 0,291324 | 0,173765 | 0,19514  | 0,173765 | 0,630404 | 1,767436 | 0,688902 | 0,090126 |
| 0,564969 | 0,331608 | 0,788741 | 0,171827 | 0,173765 | 0,205155 | 0,173765 | 0,321817 | 0,19514  | 0,19514  | 0,261365 | 0,676337 | 3,341295 | 0,734891 | 0,216682 |
| 0,526981 | 0,384226 | 0,848682 | 0,125329 | 0,172195 | 0,183017 | 0,172195 | 0,337856 | 0,172195 | 0,172195 | 0,202142 | 0,684303 | 2,45579  | 0,491876 | 0,126897 |
| 0,573977 | 0,494338 | 0,83649  | 0,117598 | 0,177184 | 0,200769 | 0,177184 | 0,356417 | 0,200769 | 0,200769 | 0,200769 | 0,600276 | 2,41175  | 0,666129 | 0,16846  |
| 0,545659 | 0,50091  | 0,831772 | 0,127191 | 0,183169 | 0,183169 | 0,197862 | 0,336839 | 0,210991 | 0,183169 | 0,183169 | 0,634819 | 1,985545 | 0,507744 | 0,171711 |
| 0,540056 | 0,4859   | 0,827189 | 0,118633 | 0,183169 | 0,183169 | 0,183169 | 0,326258 | 0,183169 | 0,210991 | 0,183169 | 0,629581 | 2,095539 | 0,590005 | 0,176861 |
| 0,522694 | 0,46387  | 0,825376 | 0,127271 | 0,172195 | 0,172195 | 0,211885 | 0,33194  | 0,211885 | 0,202142 | 0,202142 | 0,655759 | 2,251275 | 0,633913 | 0,160967 |
| 0,606301 | 0,556148 | 0,822016 | 0,112428 | 0,200769 | 0,177184 | 0,177184 | 0,370134 | 0,177184 | 0,200769 | 0,177184 | 0,633551 | 1,868147 | 1,185631 | 0,151615 |
| 0,571122 | 0,478057 | 0,828215 | 0,124698 | 0,177184 | 0,177184 | 0,200769 | 0,352771 | 0,177184 | 0,200769 | 0,200769 | 0,618105 | 2,291136 | 0,5879   | 0,180753 |
| 0,403531 | 0,308432 | 0,828457 | 0,12239  | 0,177184 | 0,189669 | 0,200769 | 0,3478   | 0,177184 | 0,200769 | 0,211886 | 0,650589 | 1,686464 | 1,175068 | 0,124488 |
| 0,513532 | 0,38126  | 0,808401 | 0,129237 | 0,192603 | 0,172195 | 0,243575 | 0,304365 | 0,172195 | 0,192603 | 0,202142 | 0,598354 | 2,519139 | 0,604551 | 0,232222 |
| 0,498721 | 0,385557 | 0,82821  | 0,128273 | 0,166667 | 0,166667 | 0,2      | 0,346557 | 0,166667 | 0,183908 | 0,183908 | 0,594174 | 2,843461 | 0,550473 | 0,203977 |
| 0,546615 | 0,493148 | 0,819995 | 0,133663 | 0,172195 | 0,172195 | 0,172195 | 0,353082 | 0,172195 | 0,172195 | 0,192603 | 0,570133 | 3,065851 | 0,720881 | 0,214162 |
| 0,51555  | 0,372587 | 0,846665 | 0,104837 | 0,192603 | 0,172195 | 0,192603 | 0,275494 | 0,172195 | 0,192603 | 0,192603 | 0,547376 | 2,58091  | 0,570703 | 0,21427  |
| 0,498122 | 0,348043 | 0,835891 | 0,11938  | 0,167949 | 0,167949 | 0,194224 | 0,30796  | 0,185892 | 0,185892 | 0,202685 | 0,605482 | 2,713439 | 0,506863 | 0,211139 |
| 0,50194  | 0,398433 | 0,821822 | 0,11868  | 0,185892 | 0,167949 | 0,185892 | 0,312145 | 0,167949 | 0,167949 | 0,229846 | 0,641967 | 2,403767 | 0,679305 | 0,183856 |
| 0,385943 | 0,265376 | 0,829637 | 0,15105  | 0,164272 | 0,164272 | 0,210612 | 0,29791  | 0,164272 | 0,164272 | 0,255441 | 0,644243 | 2,340886 | 0,60324  | 0,120751 |
| 0,472349 | 0,388476 | 0,835404 | 0,114897 | 0,167949 | 0,167949 | 0,194224 | 0,304847 | 0,167949 | 0,185892 | 0,202685 | 0,659088 | 2,400466 | 0,657418 | 0,126209 |
| 0,533275 | 0,345552 | 0,867575 | 0,09667  | 0,172195 | 0,172195 | 0,211885 | 0,253631 | 0,172195 | 0,183017 | 0,192603 | 0,521191 | 2,74981  | 0,506828 | 0,232152 |
| 0,519494 | 0,363173 | 0,831489 | 0,116477 | 0,172195 | 0,192603 | 0,192603 | 0,296331 | 0,172195 | 0,172195 | 0,172195 | 0,564131 | 2,639679 | 0,540288 | 0,211541 |
| 0,414167 | 0,350291 | 0,82273  | 0,113136 | 0,167949 | 0,185892 | 0,185892 | 0,262663 | 0,185892 | 0,185892 | 0,185892 | 0,615857 | 2,864849 | 0,803656 | 0,18912  |

| G2s      | G3s      | E2s      | E3s      | Gu       | Dv       | Dp       | Di       | Ds       | Vu       | Vm       | Vp       | Vs       | ISH      | H1u      |
|----------|----------|----------|----------|----------|----------|----------|----------|----------|----------|----------|----------|----------|----------|----------|
| 0,177184 | 0,200769 | 0,528828 | 0,207441 | 0,191393 | 0,349563 | 0,367424 | 0,543408 | 0,43574  | 47,72581 | 31,98091 | 35,50185 | 46,7673  | 0,875    | 2,063257 |
| 0,172195 | 0,172195 | 0,657735 | 0,204094 | 0,203947 | 0,330481 | 0,338644 | 0,515162 | 0,468993 | 57,28328 | 38,35379 | 41,57035 | 58,13862 | 0,845224 | 1,977151 |
| 0,177184 | 0,177184 | 0,664005 | 0,152217 | 0,19815  | 0,361451 | 0,386179 | 0,484774 | 0,462455 | 46,68402 | 52,28861 | 40,17411 | 49,12509 | 0,827305 | 1,977289 |
| 0,181063 | 0,190227 | 0,699464 | 0,16702  | 0,186124 | 0,334354 | 0,345211 | 0,503463 | 0,472438 | 68,23239 | 45,5034  | 49,91078 | 67,14954 | 0,803422 | 2,088153 |
| 0,200769 | 0,235255 | 0,772847 | 0,16473  | 0,206743 | 0,365434 | 0,379608 | 0,517439 | 0,526292 | 48,10953 | 43,75921 | 39,04141 | 53,24388 | 0,874007 | 2,028832 |
| 0,170707 | 0,170707 | 0,542147 | 0,238856 | 0,182506 | 0,363473 | 0,393611 | 0,578128 | 0,44206  | 69,12438 | 46,61016 | 50,24503 | 68,97341 | 0,840125 | 2,162698 |
| 0,177184 | 0,189669 | 0,939332 | 0,150208 | 0,191393 | 0,390824 | 0,388582 | 0,569651 | 0,668958 | 54,54298 | 44,40899 | 39,62623 | 70,03172 | 0,88487  | 2,077746 |
| 0,172195 | 0,172195 | 0,266744 | 0,380532 | 0,192603 | 0,313808 | 0,319303 | 0,44561  | 0,458218 | 64,98253 | 41,84222 | 47,40147 | 69,43691 | 0,798523 | 2,091274 |
| 0,172195 | 0,172195 | 0,629676 | 0,176694 | 0,215013 | 0,32503  | 0,333496 | 0,504754 | 0,455633 | 59,21516 | 42,7467  | 43,23236 | 60,53683 | 0,876101 | 2,135691 |
| 0,173765 | 0,185094 | 0,812613 | 0,345945 | 0,19514  | 0,365183 | 0,317632 | 0,478557 | 0,716005 | 58,93138 | 51,57234 | 42,20122 | 83,85227 | 0,817188 | 1,879074 |
| 0,173765 | 0,173765 | 0,88506  | 0,272332 | 0,199094 | 0,402607 | 0,347047 | 0,492226 | 0,664845 | 63,71075 | 58,65628 | 46,8211  | 91,97167 | 0,841968 | 2,104819 |
| 0,172195 | 0,172195 | 0,765302 | 0,37001  | 0,207121 | 0,364303 | 0,331683 | 0,543428 | 0,718359 | 59,57011 | 56,97497 | 41,69519 | 88,73322 | 0,85244  | 1,93623  |
| 0,177184 | 0,177184 | 0,733111 | 0,284289 | 0,192578 | 0,440517 | 0,468268 | 0,570679 | 0,587773 | 55,48454 | 64,38828 | 49,47285 | 68,56904 | 0,910005 | 2,056689 |
| 0,183169 | 0,183169 | 0,54722  | 0,172723 | 0,19988  | 0,371731 | 0,384185 | 0,562048 | 0,460121 | 41,95412 | 29,92149 | 31,54853 | 44,32935 | 0,863489 | 1,94678  |
| 0,183169 | 0,183169 | 0,601119 | 0,185365 | 0,201277 | 0,371779 | 0,393391 | 0,555752 | 0,471479 | 46,11027 | 33,55301 | 34,87798 | 49,02136 | 0,897617 | 1,968402 |
| 0,183017 | 0,192603 | 0,506686 | 0,216202 | 0,194534 | 0,356119 | 0,383774 | 0,565424 | 0,439293 | 64,66126 | 41,58986 | 46,85557 | 63,28287 | 0,942435 | 2,166139 |
| 0,177184 | 0,189669 | 0,579725 | 0,303835 | 0,199535 | 0,383941 | 0,398973 | 0,587424 | 0,490889 | 56,08977 | 42,3575  | 40,8391  | 63,36653 | 0,902789 | 2,083894 |
| 0,177184 | 0,177184 | 0,516246 | 0,251467 | 0,19815  | 0,425323 | 0,467881 | 0,564185 | 0,462091 | 53,24403 | 58,76898 | 47,56891 | 55,42247 | 0,88487  | 2,067528 |
| 0,177184 | 0,177184 | 0,418536 | 0,480466 | 0,22105  | 0,337151 | 0,341449 | 0,439878 | 0,505739 | 55,28527 | 49,40048 | 44,25888 | 67,28224 | 0,816442 | 1,988327 |
| 0,172195 | 0,221972 | 0,772356 | 0,187443 | 0,192429 | 0,343406 | 0,361302 | 0,505388 | 0,457144 | 54,39126 | 33,60003 | 40,82858 | 48,2629  | 0,769741 | 2,159621 |
| 0,175824 | 0,191898 | 0,849158 | 0,203305 | 0,183018 | 0,336839 | 0,355259 | 0,504634 | 0,484567 | 75,44928 | 46,91331 | 55,58503 | 67,8057  | 0,739569 | 2,153855 |
| 0,172195 | 0,192603 | 0,861412 | 0,310881 | 0,198827 | 0,440803 | 0,471112 | 0,550861 | 0,595789 | 64,69466 | 78,32184 | 58,98139 | 79,66542 | 0,832615 | 2,117592 |
| 0,172195 | 0,172195 | 0,927574 | 0,166875 | 0,184522 | 0,371846 | 0,404405 | 0,493515 | 0,516623 | 56,9696  | 59,00842 | 48,84875 | 54,64655 | 0,765388 | 2,142565 |
| 0,185892 | 0,211391 | 0,859389 | 0,171247 | 0,220242 | 0,323989 | 0,338768 | 0,489688 | 0,475418 | 64,87872 | 39,37232 | 47,44853 | 58,48804 | 0,776776 | 2,113525 |
| 0,167949 | 0,220422 | 0,625593 | 0,193669 | 0,204201 | 0,346244 | 0,371348 | 0,524604 | 0,428347 | 70,55473 | 41,44395 | 51,80472 | 61,82483 | 0,803422 | 2,218028 |
| 0,164272 | 0,164272 | 0,263258 | 0,310732 | 0,20697  | 0,313042 | 0,319376 | 0,440753 | 0,463077 | 86,48663 | 58,14116 | 65,28622 | 92,42342 | 0,727669 | 2,094891 |
| 0,177476 | 0,185892 | 0,759275 | 0,250592 | 0,195608 | 0,356622 | 0,336139 | 0,518374 | 0,657958 | 68,32276 | 61,01251 | 48,30499 | 94,59697 | 0,840036 | 2,083679 |
| 0,221972 | 0,221972 | 0,857055 | 0,152388 | 0,236098 | 0,382357 | 0,466785 | 0,47924  | 0,479773 | 56,81257 | 67,09932 | 54,73786 | 53,17643 | 0,691982 | 2,133866 |
| 0,172195 | 0,183017 | 1,001551 | 0,153235 | 0,197563 | 0,365825 | 0,384558 | 0,497289 | 0,555238 | 56,09668 | 47,76783 | 45,85549 | 56,73434 | 0,740073 | 2,150798 |
| 0,167949 | 0,185892 | 0,813025 | 0,16865  | 0,208258 | 0,329052 | 0,337152 | 0,475184 | 0,487421 | 86,49599 | 62,17673 | 64,0019  | 85,9952  | 0,829302 | 2,304683 |

| H4u      | H5u      | H6u      | H7u      | HATS0u   | HATS2u   | HATS3u   | HATS4u   | HATS5u   | HATS6u   | HATS8u   | H4m      | H5m      | H6m      | H7m      |
|----------|----------|----------|----------|----------|----------|----------|----------|----------|----------|----------|----------|----------|----------|----------|
| 0,483204 | 0,090131 | 0,042662 | 0,113057 | 0,458606 | 0,449745 | 0,716396 | 0,549056 | 0,356493 | 0,263405 | 0,52029  | 0,080269 | 0,020382 | 0,003588 | 0,002252 |
| 0,994993 | 0,353001 | 0,080175 | 0,150312 | 0,422334 | 0,423184 | 0,607053 | 0,588418 | 0,392493 | 0,199578 | 0,44013  | 0,144419 | 0,053742 | 0,007213 | 0,003441 |
| 0,536988 | 0,127664 | 0,043126 | 0,112483 | 0,490707 | 0,462986 | 0,765259 | 0,524279 | 0,315103 | 0,240963 | 0,523112 | 0,306328 | 0,034496 | 0,003876 | 0,001636 |
| 0,751331 | 0,505582 | 0,180991 | 0,170327 | 0,39772  | 0,414383 | 0,499086 | 0,462506 | 0,483647 | 0,307414 | 0,414    | 0,221681 | 0,091806 | 0,011762 | 0,004268 |
| 0,498892 | 0,100075 | 0,042565 | 0,119299 | 0,467061 | 0,450985 | 0,734368 | 0,540183 | 0,341553 | 0,255145 | 0,518336 | 0,174422 | 0,023524 | 0,00358  | 0,002258 |
| 0,741582 | 0,445708 | 0,097126 | 0,180743 | 0,399532 | 0,414549 | 0,497097 | 0,449263 | 0,434967 | 0,357914 | 0,406556 | 0,087781 | 0,029236 | 0,006775 | 0,007522 |
| 0,502681 | 0,078095 | 0,004818 | 0,133652 | 0,48638  | 0,414584 | 0,627839 | 0,573652 | 0,404656 | 0,29275  | 0,441715 | 0,120905 | 0,0083   | 0,000405 | 0,005037 |
| 0,690856 | 0,275785 | 0,178085 | 0,093639 | 0,484985 | 0,43814  | 0,495998 | 0,497423 | 0,346938 | 0,271294 | 0,514941 | 0,112964 | 0,065083 | 0,018198 | 0,001726 |
| 0,645192 | 0,337278 | 0,07152  | 0,163776 | 0,424894 | 0,44533  | 0,563822 | 0,495864 | 0,440878 | 0,262448 | 0,431571 | 0,13272  | 0,061344 | 0,010673 | 0,00469  |
| 0,971381 | 0,427176 | 0,109783 | 0,232639 | 0,467335 | 0,349484 | 0,557573 | 0,66322  | 0,464196 | 0,268835 | 0,392455 | 0,329115 | 0,138587 | 0,022395 | 0,04193  |
| 0,850564 | 0,13328  | 0,018725 | 0,065707 | 0,509419 | 0,418968 | 0,524426 | 0,533797 | 0,348896 | 0,296233 | 0,343375 | 0,162474 | 0,023658 | 0,002098 | 0,001742 |
| 0,991539 | 0,380306 | 0,080324 | 0,141199 | 0,426883 | 0,429811 | 0,577505 | 0,59076  | 0,389365 | 0,189514 | 0,427917 | 0,407689 | 0,123515 | 0,007369 | 0,003124 |
| 0,435728 | 0,045204 | 0,027153 | 0,10137  | 0,466457 | 0,41545  | 0,684045 | 0,562448 | 0,409131 | 0,290387 | 0,478833 | 0,131778 | 0,015203 | 0,002284 | 0,001788 |
| 0,467978 | 0,085033 | 0,007976 | 0,158338 | 0,568185 | 0,487232 | 0,698546 | 0,521896 | 0,329866 | 0,290594 | 0,509121 | 0,076865 | 0,009276 | 0,010625 | 0,011478 |
| 0,417657 | 0,05876  | 0,022704 | 0,193592 | 0,552499 | 0,490017 | 0,692684 | 0,51169  | 0,343337 | 0,309745 | 0,513652 | 0,062966 | 0,006559 | 0,043264 | 0,030427 |
| 0,813161 | 0,093568 | 0,081635 | 0,123032 | 0,413572 | 0,421365 | 0,535885 | 0,538739 | 0,436085 | 0,337354 | 0,355247 | 0,063995 | 0,029758 | 0,007625 | 0,005176 |
| 0,470926 | 0,057388 | 0,009172 | 0,13465  | 0,481882 | 0,405395 | 0,623187 | 0,585551 | 0,429346 | 0,297742 | 0,443243 | 0,06596  | 0,008132 | 0,000771 | 0,041331 |
| 0,436985 | 0,047239 | 0,028748 | 0,098473 | 0,468868 | 0,422872 | 0,684164 | 0,557817 | 0,403519 | 0,286652 | 0,499185 | 0,054409 | 0,017022 | 0,002418 | 0,001629 |
| 0,573295 | 0,239661 | 0,066251 | 0,12569  | 0,533725 | 0,429455 | 0,616804 | 0,577339 | 0,327422 | 0,241623 | 0,462534 | 0,512337 | 0,359709 | 0,005958 | 0,002233 |
| 0,65449  | 0,214676 | 0,103748 | 0,106516 | 0,408703 | 0,411707 | 0,639313 | 0,566554 | 0,415566 | 0,273287 | 0,383824 | 0,150619 | 0,033634 | 0,009769 | 0,001769 |
| 1,015121 | 0,697661 | 0,29627  | 0,21034  | 0,354971 | 0,373051 | 0,494874 | 0,506867 | 0,488401 | 0,304781 | 0,320121 | 0,294637 | 0,100569 | 0,01948  | 0,00861  |
| 0,602739 | 0,143061 | 0,034739 | 0,155988 | 0,426341 | 0,386673 | 0,642719 | 0,544291 | 0,399056 | 0,267282 | 0,365248 | 0,276446 | 0,194773 | 0,104366 | 0,007554 |
| 0,641387 | 0,212175 | 0,094785 | 0,122435 | 0,408934 | 0,408065 | 0,64596  | 0,566064 | 0,405716 | 0,272513 | 0,373677 | 0,401261 | 0,03299  | 0,008784 | 0,002024 |
| 1,164718 | 0,45662  | 0,133044 | 0,146693 | 0,373796 | 0,382102 | 0,556077 | 0,612725 | 0,437312 | 0,225985 | 0,330564 | 0,202289 | 0,066137 | 0,012605 | 0,004113 |
| 0,978745 | 0,191317 | 0,140003 | 0,155901 | 0,374054 | 0,401268 | 0,526589 | 0,540623 | 0,424246 | 0,292296 | 0,299225 | 0,115459 | 0,041371 | 0,013458 | 0,007866 |
| 1,128598 | 0,910841 | 0,256809 | 0,044697 | 0,41971  | 0,373272 | 0,546612 | 0,458806 | 0,332185 | 0,244305 | 0,266354 | 0,380269 | 0,218567 | 0,111096 | 0,010373 |
| 1,166996 | 0,491657 | 0,138688 | 0,15826  | 0,372852 | 0,386023 | 0,537611 | 0,609028 | 0,436575 | 0,21772  | 0,323718 | 0,472188 | 0,147953 | 0,013204 | 0,048184 |
| 0,644835 | 0,20026  | 0,083715 | 0,114679 | 0,41142  | 0,408142 | 0,652274 | 0,568214 | 0,400746 | 0,272211 | 0,374166 | 0,541295 | 0,030395 | 0,007705 | 0,001844 |
| 0,643197 | 0,196946 | 0,089535 | 0,11973  | 0,407744 | 0,408037 | 0,645532 | 0,567645 | 0,407696 | 0,274564 | 0,377258 | 0,254958 | 0,029748 | 0,008254 | 0,001961 |
| 0,729809 | 0,252139 | 0,049053 | 0,130809 | 0,379549 | 0,386972 | 0,493514 | 0,51998  | 0,501573 | 0,31223  | 0,323435 | 0,134729 | 0,01231  | 0,004125 | 0,003645 |



| H8m      | HATS0m   | HATS3m   | HATS4m   | HATS6m   | HATS8m   | H0v      | H1v      | H2v      | H4v      | HATS1v   | HATS5v   | HATS6v   | HATS7v   | HATS8v   |
|----------|----------|----------|----------|----------|----------|----------|----------|----------|----------|----------|----------|----------|----------|----------|
| 0,021322 | 0,253958 | 0,154016 | 0,16173  | 0,144523 | 0,115765 | 1,23537  | 1,140217 | 0,893736 | 0,112176 | 0,138013 | 0,129033 | 0,109677 | 0,102335 | 0,133885 |
| 0,040192 | 0,211189 | 0,135574 | 0,136251 | 0,125265 | 0,087609 | 1,139041 | 1,046944 | 0,862751 | 0,210079 | 0,112937 | 0,109366 | 0,087712 | 0,087238 | 0,10752  |
| 0,039325 | 1,606934 | 0,314548 | 0,187949 | 0,285141 | 0,188555 | 1,453553 | 1,187482 | 1,032153 | 0,174349 | 0,140784 | 0,117508 | 0,115566 | 0,124638 | 0,139329 |
| 0,033839 | 0,188949 | 0,133546 | 0,134981 | 0,11446  | 0,104978 | 1,165769 | 1,09338  | 0,908018 | 0,244039 | 0,111711 | 0,121861 | 0,088508 | 0,083918 | 0,111437 |
| 0,026689 | 0,486692 | 0,224966 | 0,17366  | 0,20646  | 0,144172 | 1,394571 | 1,204756 | 1,026702 | 0,152276 | 0,143183 | 0,125968 | 0,118281 | 0,121314 | 0,139707 |
| 0,016284 | 0,260323 | 0,143661 | 0,167432 | 0,175507 | 0,104122 | 1,238627 | 1,165255 | 0,94057  | 0,179279 | 0,129976 | 0,147275 | 0,121154 | 0,097159 | 0,115904 |
| 0,003006 | 0,459542 | 0,195991 | 0,193544 | 0,231191 | 0,161862 | 1,37454  | 1,237287 | 0,971067 | 0,126874 | 0,16309  | 0,153562 | 0,129859 | 0,100447 | 0,14492  |
| 0,001768 | 0,403525 | 0,141504 | 0,128051 | 0,092832 | 0,128581 | 1,26138  | 1,145613 | 0,891289 | 0,141667 | 0,149571 | 0,104126 | 0,084297 | 0,090532 | 0,140639 |
| 0,035521 | 0,25141  | 0,163849 | 0,16458  | 0,176063 | 0,112703 | 1,258411 | 1,198337 | 1,031427 | 0,181304 | 0,13173  | 0,131456 | 0,106714 | 0,100418 | 0,120558 |
| 0,054641 | 0,497167 | 0,216528 | 0,222304 | 0,234609 | 0,212761 | 1,350953 | 1,084168 | 0,837946 | 0,293625 | 0,132728 | 0,159782 | 0,123399 | 0,108037 | 0,130908 |
| 0,000506 | 0,604472 | 0,196535 | 0,216946 | 0,248224 | 0,160209 | 1,452742 | 1,266297 | 1,086668 | 0,201876 | 0,173258 | 0,149873 | 0,131744 | 0,104688 | 0,132394 |
| 0,031101 | 0,44431  | 0,223225 | 0,22068  | 0,135693 | 0,247966 | 1,297952 | 1,130868 | 0,984069 | 0,299741 | 0,125602 | 0,118849 | 0,08781  | 0,103338 | 0,131778 |
| 0,017859 | 1,204551 | 0,741182 | 0,278324 | 0,450966 | 0,230534 | 1,736988 | 1,362946 | 1,213706 | 0,122844 | 0,168134 | 0,180887 | 0,168869 | 0,131496 | 0,171971 |
| 0,004232 | 0,476731 | 0,170396 | 0,204908 | 0,189134 | 0,229897 | 1,305631 | 1,101709 | 0,733656 | 0,107377 | 0,17147  | 0,14405  | 0,118099 | 0,102619 | 0,158652 |
| 0,002885 | 0,603798 | 0,222623 | 0,277537 | 0,217709 | 0,429143 | 1,464571 | 1,198035 | 0,782385 | 0,094007 | 0,186961 | 0,155252 | 0,134716 | 0,123967 | 0,197368 |
| 0,024509 | 0,241111 | 0,14004  | 0,15629  | 0,161931 | 0,090804 | 1,221542 | 1,164789 | 0,967329 | 0,127103 | 0,128915 | 0,141432 | 0,118308 | 0,092492 | 0,109061 |
| 0,020345 | 0,463539 | 0,209526 | 0,267339 | 0,210895 | 0,190386 | 1,379799 | 1,236509 | 0,958195 | 0,102862 | 0,16066  | 0,172592 | 0,128965 | 0,099758 | 0,154301 |
| 0,011784 | 4,046081 | 0,423426 | 0,378183 | 0,640225 | 0,325595 | 1,698757 | 1,306759 | 1,116036 | 0,092832 | 0,163877 | 0,183531 | 0,162585 | 0,115526 | 0,177941 |
| 0,01613  | 0,934682 | 0,268984 | 0,323492 | 0,207034 | 0,277284 | 1,560704 | 1,233324 | 0,948523 | 0,220558 | 0,173381 | 0,152989 | 0,119055 | 0,120415 | 0,188046 |
| 0,001535 | 0,202116 | 0,128987 | 0,146058 | 0,144089 | 0,057245 | 1,227213 | 1,187479 | 0,99389  | 0,169468 | 0,126332 | 0,130328 | 0,109238 | 0,100554 | 0,093182 |
| 0,004119 | 0,170719 | 0,12402  | 0,129    | 0,12154  | 0,065544 | 1,163651 | 1,126834 | 0,97061  | 0,328997 | 0,102561 | 0,122212 | 0,090994 | 0,084074 | 0,085133 |
| 0,004317 | 0,97961  | 0,628857 | 0,222222 | 0,344702 | 0,140579 | 1,67076  | 1,384464 | 1,300874 | 0,195165 | 0,153911 | 0,149409 | 0,14157  | 0,125125 | 0,123919 |
| 0,00164  | 1,453742 | 0,298191 | 0,18746  | 0,293687 | 0,153138 | 1,476652 | 1,287123 | 1,173872 | 0,220028 | 0,136219 | 0,131131 | 0,122536 | 0,119597 | 0,10663  |
| 0,001828 | 0,172009 | 0,118343 | 0,126515 | 0,127727 | 0,05036  | 1,149075 | 1,115557 | 0,979035 | 0,263574 | 0,105381 | 0,114519 | 0,092298 | 0,090169 | 0,081016 |
| 0,000416 | 0,169652 | 0,113695 | 0,124848 | 0,135458 | 0,050417 | 1,179829 | 1,172015 | 1,035328 | 0,177624 | 0,113321 | 0,121896 | 0,101969 | 0,090073 | 0,084805 |
| 0,008204 | 0,322987 | 0,128729 | 0,112469 | 0,1015   | 0,061646 | 1,29185  | 1,199533 | 1,012758 | 0,363759 | 0,127748 | 0,100396 | 0,077668 | 0,078586 | 0,087088 |
| 0,001861 | 0,330536 | 0,194883 | 0,200129 | 0,139795 | 0,164211 | 1,289783 | 1,204277 | 1,113684 | 0,357094 | 0,117645 | 0,123873 | 0,093284 | 0,103701 | 0,098947 |
| 0,001414 | 3,765109 | 0,411916 | 0,21637  | 0,394207 | 0,219172 | 1,630737 | 1,314073 | 1,229267 | 0,232589 | 0,138607 | 0,131449 | 0,126891 | 0,126982 | 0,111661 |
| 0,001504 | 0,417413 | 0,199509 | 0,161991 | 0,204958 | 0,097007 | 1,393051 | 1,269856 | 1,140814 | 0,208091 | 0,134065 | 0,131392 | 0,119962 | 0,1156   | 0,103943 |
| 0,001864 | 0,263922 | 0,160179 | 0,167448 | 0,21011  | 0,070703 | 1,307106 | 1,307636 | 1,223097 | 0,186414 | 0,128538 | 0,144972 | 0,122641 | 0,113821 | 0,09108  |

| H1e      | H8e      | HATS1e   | HATS2e   | HATS4e   | HATS5e   | H1p      | H7p      | HATS1p   | HATS4p   | HATS5p   | HATS6p   | HATS7p   | HATS8p   | HATS2i   |
|----------|----------|----------|----------|----------|----------|----------|----------|----------|----------|----------|----------|----------|----------|----------|
| 2,200223 | 0,119219 | 0,277031 | 0,476072 | 0,610795 | 0,42047  | 1,123234 | 0,020832 | 0,134328 | 0,154267 | 0,113487 | 0,10381  | 0,129444 | 0,161732 | 0,560848 |
| 2,102153 | 0,139923 | 0,24221  | 0,440978 | 0,628555 | 0,434004 | 1,040471 | 0,028572 | 0,111081 | 0,157368 | 0,105584 | 0,080572 | 0,105182 | 0,128359 | 0,543716 |
| 2,120482 | 0,124477 | 0,264919 | 0,489657 | 0,597173 | 0,371215 | 1,223    | 0,018875 | 0,145491 | 0,169831 | 0,106384 | 0,113346 | 0,152593 | 0,175089 | 0,576218 |
| 2,225519 | 0,1307   | 0,245144 | 0,436789 | 0,504364 | 0,504818 | 1,07919  | 0,034064 | 0,111619 | 0,153174 | 0,133809 | 0,092123 | 0,097481 | 0,127075 | 0,541096 |
| 2,195614 | 0,122871 | 0,273172 | 0,483412 | 0,61551  | 0,402682 | 1,19671  | 0,021618 | 0,141606 | 0,167813 | 0,112295 | 0,111552 | 0,144269 | 0,169503 | 0,561479 |
| 2,358716 | 0,12459  | 0,2745   | 0,451624 | 0,512242 | 0,497876 | 1,105242 | 0,036918 | 0,12123  | 0,144542 | 0,137685 | 0,117005 | 0,113395 | 0,128348 | 0,538921 |
| 2,326778 | 0,132177 | 0,316307 | 0,489115 | 0,660314 | 0,496637 | 1,12262  | 0,031894 | 0,140015 | 0,1626   | 0,125105 | 0,105889 | 0,109645 | 0,153229 | 0,5286   |
| 2,209814 | 0,092796 | 0,298729 | 0,498416 | 0,553579 | 0,377263 | 1,134404 | 0,016827 | 0,137287 | 0,142327 | 0,103963 | 0,089918 | 0,111717 | 0,165179 | 0,570068 |
| 2,367433 | 0,115724 | 0,274999 | 0,497987 | 0,56586  | 0,494898 | 1,099997 | 0,03132  | 0,121373 | 0,156145 | 0,124376 | 0,09354  | 0,109998 | 0,133076 | 0,578246 |
| 2,184547 | 0,210787 | 0,284559 | 0,424933 | 0,777532 | 0,582368 | 0,953129 | 0,052765 | 0,106448 | 0,181571 | 0,128326 | 0,095225 | 0,101742 | 0,12084  | 0,450823 |
| 2,475158 | 0,063516 | 0,349888 | 0,537578 | 0,640393 | 0,453187 | 1,084825 | 0,013433 | 0,13494  | 0,151376 | 0,112887 | 0,101007 | 0,098208 | 0,129297 | 0,543518 |
| 2,196019 | 0,124763 | 0,257827 | 0,562691 | 0,722729 | 0,488703 | 1,004159 | 0,026969 | 0,105536 | 0,148778 | 0,098932 | 0,076084 | 0,099859 | 0,121257 | 0,647112 |
| 2,298175 | 0,094248 | 0,290096 | 0,466564 | 0,657622 | 0,511476 | 1,340643 | 0,017969 | 0,162815 | 0,220873 | 0,16454  | 0,148101 | 0,149381 | 0,206056 | 0,5109   |
| 2,188797 | 0,047389 | 0,343512 | 0,573993 | 0,619582 | 0,431048 | 0,988408 | 0,025721 | 0,148964 | 0,140053 | 0,109554 | 0,099436 | 0,11672  | 0,159116 | 0,625183 |
| 2,178144 | 0,032308 | 0,34321  | 0,55932  | 0,601845 | 0,444926 | 1,198375 | 0,092498 | 0,181584 | 0,162709 | 0,125896 | 0,136874 | 0,166744 | 0,207506 | 0,604242 |
| 2,306179 | 0,047223 | 0,273079 | 0,440077 | 0,580842 | 0,487026 | 1,154589 | 0,018984 | 0,125992 | 0,161949 | 0,134738 | 0,111058 | 0,108995 | 0,129772 | 0,539752 |
| 2,327838 | 0,211357 | 0,313311 | 0,469342 | 0,696749 | 0,563545 | 1,127822 | 0,030176 | 0,139136 | 0,164923 | 0,128854 | 0,107141 | 0,108895 | 0,150874 | 0,511969 |
| 2,254691 | 0,085282 | 0,284371 | 0,459002 | 0,631742 | 0,493812 | 1,328685 | 0,017126 | 0,16677  | 0,228141 | 0,18024  | 0,153384 | 0,145631 | 0,23386  | 0,517808 |
| 2,191307 | 0,121849 | 0,316391 | 0,516485 | 0,683677 | 0,425669 | 1,182482 | 0,022329 | 0,154069 | 0,204234 | 0,13288  | 0,109577 | 0,152128 | 0,207241 | 0,544829 |
| 2,260147 | 0,072803 | 0,252822 | 0,426646 | 0,583638 | 0,477305 | 1,202111 | 0,018545 | 0,128063 | 0,163916 | 0,122431 | 0,106038 | 0,116085 | 0,124056 | 0,511423 |
| 2,275123 | 0,164287 | 0,221625 | 0,387627 | 0,527265 | 0,517495 | 1,12811  | 0,052285 | 0,103724 | 0,161135 | 0,132733 | 0,093613 | 0,088529 | 0,103485 | 0,48176  |
| 2,322457 | 0,162372 | 0,262279 | 0,421816 | 0,603721 | 0,47486  | 1,384781 | 0,042353 | 0,152252 | 0,205244 | 0,142306 | 0,127517 | 0,130968 | 0,160326 | 0,47246  |
| 2,268479 | 0,078704 | 0,250741 | 0,428649 | 0,591349 | 0,466468 | 1,339641 | 0,021291 | 0,142639 | 0,189419 | 0,124783 | 0,121046 | 0,134864 | 0,141702 | 0,501798 |
| 2,207102 | 0,100105 | 0,223908 | 0,39033  | 0,616399 | 0,48079  | 1,138583 | 0,029159 | 0,107853 | 0,168754 | 0,114886 | 0,088291 | 0,098842 | 0,103991 | 0,486189 |
| 2,303035 | 0,052172 | 0,238917 | 0,407996 | 0,547135 | 0,463957 | 1,205256 | 0,028717 | 0,117926 | 0,159173 | 0,122908 | 0,099492 | 0,099975 | 0,111067 | 0,511332 |
| 2,18801  | 0,116367 | 0,2443   | 0,421246 | 0,507012 | 0,363209 | 1,207464 | 0,020495 | 0,120297 | 0,137465 | 0,106596 | 0,079689 | 0,080936 | 0,106979 | 0,470923 |
| 2,314554 | 0,095436 | 0,239918 | 0,478964 | 0,691709 | 0,528908 | 1,106075 | 0,03131  | 0,104141 | 0,161335 | 0,110164 | 0,084747 | 0,094984 | 0,099025 | 0,558119 |
| 2,239476 | 0,075413 | 0,245636 | 0,422204 | 0,585098 | 0,4601   | 1,487174 | 0,019781 | 0,160119 | 0,218151 | 0,129561 | 0,138686 | 0,15899  | 0,163157 | 0,497752 |
| 2,288329 | 0,077081 | 0,253037 | 0,430676 | 0,597054 | 0,468615 | 1,287843 | 0,020763 | 0,136563 | 0,179896 | 0,123895 | 0,115476 | 0,127333 | 0,134907 | 0,504399 |
| 2,537963 | 0,09935  | 0,266031 | 0,428562 | 0,568873 | 0,554556 | 1,215006 | 0,027285 | 0,117835 | 0,172156 | 0,142434 | 0,106641 | 0,106295 | 0,105918 | 0,496312 |

| HATS7i   | H1s      | H2s      | H3s      | H6s      | H8s      | HATS0s   | HATS3s   | HATS5s   | HATS6s   | HATS7s   | RARS     | REIG     | R1u      | R2u      |
|----------|----------|----------|----------|----------|----------|----------|----------|----------|----------|----------|----------|----------|----------|----------|
| 0,442941 | 8,915961 | 13,44514 | 5,577107 | 0,082054 | 0,330686 | 4,588094 | 2,383476 | 2,285086 | 1,631313 | 0,694154 | 0,73846  | 0,792268 | 1,921224 | 1,786303 |
| 0,388095 | 8,228057 | 12,13783 | 5,821372 | 0,179369 | 0,528912 | 3,868504 | 2,146525 | 2,003568 | 1,377472 | 0,672332 | 0,699997 | 0,757909 | 1,889439 | 1,860195 |
| 0,440492 | 8,408982 | 12,08392 | 6,094992 | 0,099444 | 0,504179 | 4,236486 | 2,685808 | 1,98949  | 1,521576 | 0,848233 | 0,717858 | 0,793415 | 1,825083 | 1,756099 |
| 0,309237 | 8,58076  | 12,89648 | 5,785186 | 0,363304 | 0,456811 | 3,222315 | 1,838777 | 1,850047 | 1,322015 | 0,623203 | 0,69468  | 0,73728  | 1,963553 | 1,899183 |
| 0,443082 | 9,102897 | 13,88612 | 6,789613 | 0,082553 | 0,385332 | 4,64652  | 2,728668 | 2,156926 | 1,72467  | 0,979361 | 0,72532  | 0,785837 | 1,857477 | 1,757243 |
| 0,4622   | 9,827749 | 15,80254 | 5,907788 | 0,167867 | 0,31388  | 4,348688 | 1,886429 | 2,528792 | 1,903085 | 0,788663 | 0,685069 | 0,737806 | 1,982623 | 1,874213 |
| 0,379291 | 11,44443 | 20,2013  | 6,530685 | 0,009637 | 0,17266  | 9,604905 | 2,898751 | 3,11017  | 2,752991 | 1,287076 | 0,708472 | 0,762601 | 1,875063 | 1,656337 |
| 0,312798 | 9,353891 | 17,89    | 4,101806 | 0,513222 | 0,117219 | 9,35614  | 1,937723 | 1,835399 | 1,066914 | 0,552321 | 0,675692 | 0,751149 | 1,92867  | 1,795998 |
| 0,390646 | 9,577067 | 15,74728 | 6,270101 | 0,165217 | 0,457305 | 4,052873 | 2,140013 | 2,302314 | 1,687527 | 0,806818 | 0,693227 | 0,749416 | 1,974294 | 1,940716 |
| 0,405001 | 11,43641 | 16,5042  | 7,373178 | 0,29997  | 0,735927 | 10,54031 | 2,633162 | 3,769653 | 2,676356 | 2,004828 | 0,673655 | 0,726576 | 1,789024 | 1,593296 |
| 0,33679  | 13,90918 | 29,66022 | 5,777836 | 0,065537 | 0,071609 | 14,0861  | 2,511747 | 3,344371 | 3,089012 | 1,695154 | 0,666522 | 0,74696  | 1,866011 | 1,633111 |
| 0,4145   | 10,16429 | 25,91621 | 9,61356  | 0,187644 | 0,426613 | 9,860277 | 2,856646 | 2,830298 | 1,401244 | 1,979714 | 0,682617 | 0,737292 | 1,799582 | 1,796074 |
| 0,38712  | 10,29341 | 15,80338 | 8,556097 | 0,054306 | 0,266535 | 6,323679 | 3,502229 | 3,082562 | 2,677136 | 1,052139 | 0,70496  | 0,752142 | 1,795764 | 1,666437 |
| 0,397775 | 10,44368 | 17,87494 | 2,274205 | 0,041872 | 0,096097 | 9,975891 | 2,810577 | 3,109999 | 2,358221 | 0,819049 | 0,728324 | 0,796743 | 1,847381 | 1,682891 |
| 0,384723 | 9,995679 | 16,69602 | 2,446763 | 0,055927 | 0,068609 | 9,085833 | 2,563116 | 3,142641 | 2,356737 | 0,736713 | 0,721868 | 0,782532 | 1,832671 | 1,66391  |
| 0,401287 | 9,117863 | 14,05616 | 5,887491 | 0,217502 | 0,281551 | 4,050898 | 1,907483 | 2,372594 | 1,844936 | 0,750049 | 0,70431  | 0,753798 | 1,984103 | 1,870211 |
| 0,395432 | 11,32888 | 19,11648 | 5,585053 | 0,018345 | 1,160204 | 9,531057 | 2,798734 | 4,202989 | 2,439459 | 1,059899 | 0,706837 | 0,759016 | 1,876128 | 1,647704 |
| 0,392676 | 9,470468 | 14,65688 | 5,953955 | 0,057496 | 0,199902 | 5,054841 | 2,45574  | 2,780917 | 2,147075 | 0,682415 | 0,714634 | 0,761651 | 1,839507 | 1,702758 |
| 0,403011 | 10,34906 | 18,54768 | 4,35512  | 0,14139  | 0,313085 | 11,46009 | 2,563034 | 3,006157 | 1,900279 | 0,942273 | 0,686094 | 0,755863 | 1,80581  | 1,63312  |
| 0,431203 | 8,49404  | 13,6382  | 5,963285 | 0,25717  | 0,093772 | 3,512304 | 1,861847 | 1,906272 | 1,638505 | 1,219369 | 0,746816 | 0,785818 | 1,989024 | 1,881132 |
| 0,316934 | 8,356464 | 12,75    | 7,009509 | 0,609551 | 0,219634 | 2,859906 | 1,576529 | 1,605757 | 1,420291 | 1,085608 | 0,701091 | 0,734313 | 2,001439 | 1,967864 |
| 0,375129 | 9,908637 | 16,45281 | 9,212178 | 0,39124  | 0,21668  | 5,906624 | 2,946408 | 2,072951 | 2,238198 | 1,590489 | 0,69923  | 0,739293 | 1,846269 | 1,758715 |
| 0,418522 | 8,594938 | 13,9837  | 6,573715 | 0,222487 | 0,101135 | 3,517684 | 2,032719 | 1,841109 | 1,704699 | 1,333832 | 0,733225 | 0,77356  | 1,927481 | 1,843765 |
| 0,395273 | 8,020539 | 12,92941 | 6,569561 | 0,332165 | 0,125473 | 3,012147 | 1,687736 | 1,692066 | 1,421647 | 1,177941 | 0,712782 | 0,755285 | 1,970759 | 1,944235 |
| 0,370372 | 8,253111 | 13,6219  | 6,364689 | 0,357801 | 0,058819 | 2,847168 | 1,601944 | 1,654363 | 1,541515 | 1,058989 | 0,709009 | 0,752586 | 2,027189 | 1,975421 |
| 0,298253 | 8,919297 | 16,65877 | 3,897326 | 1,74188  | 0,202742 | 7,304625 | 1,862301 | 1,372581 | 1,168354 | 1,136986 | 0,608163 | 0,713522 | 1,91498  | 1,764708 |
| 0,41512  | 10,04034 | 29,16828 | 10,485   | 0,351678 | 0,121072 | 7,065318 | 2,349935 | 2,432807 | 1,484865 | 2,235962 | 0,698052 | 0,739997 | 1,893392 | 1,884843 |
| 0,412923 | 8,36414  | 13,4655  | 6,217266 | 0,191836 | 0,094975 | 3,167823 | 1,966426 | 1,804577 | 1,632883 | 1,26668  | 0,730855 | 0,772485 | 1,9147   | 1,838248 |
| 0,423681 | 8,884924 | 14,43056 | 7,12674  | 0,206838 | 0,097791 | 3,593246 | 2,148729 | 1,844862 | 1,776426 | 1,427302 | 0,737052 | 0,776685 | 1,942523 | 1,851261 |
| 0,397411 | 9,859497 | 16,10083 | 7,031511 | 0,09163  | 0,125138 | 4,085972 | 1,653182 | 1,874574 | 2,054352 | 1,647989 | 0,683018 | 0,718124 | 2,051793 | 1,98372  |

| R4u      | R6u      | R7u      | R8u      | R1u+     | R2u+     | R4m      | R6m      | R2m+     | R4m+     | R5m+     | R8m+     | R2v      | R3v      | R4v      |
|----------|----------|----------|----------|----------|----------|----------|----------|----------|----------|----------|----------|----------|----------|----------|
| 1,104637 | 0,40159  | 0,430517 | 0,506549 | 0,13524  | 0,101014 | 0,399723 | 0,234866 | 0,156246 | 0,039695 | 0,062802 | 0,031945 | 0,778565 | 0,548491 | 0,370721 |
| 1,36861  | 0,36666  | 0,426981 | 0,502249 | 0,140192 | 0,1074   | 0,377543 | 0,228599 | 0,142653 | 0,035643 | 0,055529 | 0,024493 | 0,742265 | 0,55624  | 0,391074 |
| 1,061287 | 0,383452 | 0,424924 | 0,503359 | 0,159983 | 0,121607 | 0,484699 | 0,420623 | 0,292817 | 0,072966 | 0,06753  | 0,080413 | 0,837029 | 0,610206 | 0,381585 |
| 1,184279 | 0,517427 | 0,395453 | 0,50378  | 0,139056 | 0,102436 | 0,406599 | 0,232956 | 0,123492 | 0,031751 | 0,045789 | 0,025214 | 0,741895 | 0,550238 | 0,418678 |
| 1,083155 | 0,393688 | 0,42756  | 0,504387 | 0,143331 | 0,108872 | 0,438667 | 0,317451 | 0,148143 | 0,038071 | 0,059628 | 0,035279 | 0,836958 | 0,607392 | 0,386479 |
| 1,129898 | 0,561972 | 0,491337 | 0,482092 | 0,138028 | 0,087064 | 0,44842  | 0,292216 | 0,149491 | 0,041262 | 0,063685 | 0,031837 | 0,739278 | 0,527991 | 0,416905 |
| 1,087388 | 0,404329 | 0,39171  | 0,471644 | 0,170834 | 0,122249 | 0,433061 | 0,303454 | 0,216962 | 0,045685 | 0,071536 | 0,031598 | 0,802955 | 0,568849 | 0,380859 |
| 1,144189 | 0,49157  | 0,374664 | 0,545033 | 0,176849 | 0,13215  | 0,387456 | 0,200734 | 0,234534 | 0,041852 | 0,064665 | 0,027947 | 0,714216 | 0,510469 | 0,379638 |
| 1,137822 | 0,429855 | 0,428611 | 0,486704 | 0,138222 | 0,097788 | 0,454486 | 0,308145 | 0,141739 | 0,038213 | 0,05868  | 0,030428 | 0,844578 | 0,57946  | 0,420472 |
| 1,351393 | 0,392648 | 0,398716 | 0,430929 | 0,148092 | 0,104386 | 0,540498 | 0,31196  | 0,18526  | 0,050514 | 0,083823 | 0,039337 | 0,779674 | 0,606066 | 0,464586 |
| 1,158433 | 0,447586 | 0,381024 | 0,408806 | 0,185591 | 0,142269 | 0,524617 | 0,359218 | 0,252493 | 0,043916 | 0,072306 | 0,028602 | 0,804004 | 0,567818 | 0,427688 |
| 1,352355 | 0,358795 | 0,421505 | 0,491671 | 0,132301 | 0,098592 | 0,586308 | 0,268489 | 0,229948 | 0,038639 | 0,053655 | 0,040575 | 0,839425 | 0,616363 | 0,459745 |
| 1,071452 | 0,403434 | 0,403069 | 0,484052 | 0,133876 | 0,089182 | 0,594262 | 0,498542 | 0,158102 | 0,086643 | 0,12046  | 0,051802 | 0,909648 | 0,726329 | 0,439183 |
| 0,86987  | 0,366587 | 0,350603 | 0,415038 | 0,179656 | 0,135958 | 0,418698 | 0,235802 | 0,241293 | 0,047653 | 0,073536 | 0,056514 | 0,751764 | 0,45042  | 0,319146 |
| 0,861879 | 0,372292 | 0,350722 | 0,410709 | 0,183159 | 0,129058 | 0,5128   | 0,271633 | 0,229046 | 0,11361  | 0,074204 | 0,129417 | 0,81453  | 0,477605 | 0,341394 |
| 1,284522 | 0,515111 | 0,440167 | 0,435444 | 0,143144 | 0,097448 | 0,406029 | 0,261893 | 0,142749 | 0,039759 | 0,063145 | 0,032104 | 0,754411 | 0,5463   | 0,402336 |
| 1,08976  | 0,403753 | 0,393616 | 0,470165 | 0,161308 | 0,116186 | 0,54804  | 0,282354 | 0,206202 | 0,076408 | 0,078502 | 0,045164 | 0,79083  | 0,573925 | 0,402683 |
| 1,07808  | 0,404246 | 0,408926 | 0,490431 | 0,138065 | 0,091437 | 0,727167 | 0,61451  | 0,357625 | 0,194017 | 0,266463 | 0,11699  | 0,861307 | 0,630521 | 0,427433 |
| 1,076675 | 0,379581 | 0,38693  | 0,441373 | 0,184698 | 0,142844 | 0,724948 | 0,300272 | 0,253514 | 0,177151 | 0,146005 | 0,084121 | 0,801599 | 0,599864 | 0,44033  |
| 1,301318 | 0,510773 | 0,466893 | 0,457746 | 0,131828 | 0,102521 | 0,419313 | 0,301617 | 0,123898 | 0,047249 | 0,034196 | 0,016542 | 0,80244  | 0,577611 | 0,413642 |
| 1,375538 | 0,604884 | 0,433705 | 0,474538 | 0,117215 | 0,079121 | 0,420212 | 0,296236 | 0,093349 | 0,03535  | 0,03051  | 0,014714 | 0,764546 | 0,581927 | 0,451756 |
| 1,220745 | 0,447105 | 0,431072 | 0,448881 | 0,152437 | 0,072367 | 0,544038 | 0,479419 | 0,147771 | 0,07562  | 0,095211 | 0,037009 | 0,911807 | 0,728801 | 0,440638 |
| 1,285587 | 0,503465 | 0,458425 | 0,449711 | 0,12943  | 0,098825 | 0,526265 | 0,502511 | 0,290597 | 0,078655 | 0,065491 | 0,084645 | 0,876724 | 0,651672 | 0,437807 |
| 1,554255 | 0,481924 | 0,473529 | 0,459464 | 0,128785 | 0,09506  | 0,398616 | 0,292723 | 0,108289 | 0,043074 | 0,031718 | 0,01359  | 0,772739 | 0,590981 | 0,433828 |
| 1,444399 | 0,582347 | 0,465743 | 0,4099   | 0,128769 | 0,091529 | 0,404871 | 0,303712 | 0,111884 | 0,04366  | 0,031719 | 0,015925 | 0,771334 | 0,570608 | 0,428151 |
| 1,213621 | 0,52749  | 0,403103 | 0,412221 | 0,148564 | 0,118067 | 0,394455 | 0,256779 | 0,209541 | 0,038948 | 0,026685 | 0,011726 | 0,772    | 0,576709 | 0,419747 |
| 1,535236 | 0,475354 | 0,469699 | 0,450137 | 0,120699 | 0,093225 | 0,592902 | 0,333002 | 0,174901 | 0,04336  | 0,032387 | 0,030801 | 0,860571 | 0,648278 | 0,497742 |
| 1,281543 | 0,49877  | 0,456189 | 0,453098 | 0,135515 | 0,099694 | 0,585627 | 0,615347 | 0,442393 | 0,123762 | 0,10547  | 0,13551  | 0,893554 | 0,669787 | 0,442359 |
| 1,288469 | 0,504833 | 0,461237 | 0,454368 | 0,130323 | 0,098747 | 0,464651 | 0,384739 | 0,133366 | 0,046358 | 0,033407 | 0,037344 | 0,866237 | 0,639547 | 0,433499 |
| 1,289202 | 0,503119 | 0,453346 | 0,432981 | 0,132906 | 0,086732 | 0,460669 | 0,346356 | 0,105282 | 0,033013 | 0,032739 | 0,016084 | 0,874269 | 0,610488 | 0,452072 |

| R5v      | R6v      | R7v      | R8v      | R2v+     | R1e      | R2e      | R3e      | R8e      | RTe      | R5e+     | R4p      | R5p      | R6p      | R7p      |
|----------|----------|----------|----------|----------|----------|----------|----------|----------|----------|----------|----------|----------|----------|----------|
| 0,251449 | 0,185842 | 0,148532 | 0,160256 | 0,044982 | 2,026695 | 1,859863 | 1,866114 | 0,49799  | 19,59279 | 0,062341 | 0,363024 | 0,229149 | 0,178416 | 0,176618 |
| 0,242705 | 0,175155 | 0,147958 | 0,152179 | 0,041069 | 1,982365 | 1,907959 | 1,792363 | 0,504988 | 20,53137 | 0,055122 | 0,416895 | 0,237057 | 0,166778 | 0,170069 |
| 0,248662 | 0,197626 | 0,169805 | 0,166877 | 0,056717 | 1,933419 | 1,842051 | 1,88579  | 0,495361 | 19,29139 | 0,056338 | 0,391864 | 0,231566 | 0,193273 | 0,1997   |
| 0,282695 | 0,185464 | 0,152062 | 0,162704 | 0,039877 | 2,070881 | 1,998329 | 1,680893 | 0,509923 | 21,33746 | 0,04973  | 0,433423 | 0,30169  | 0,188602 | 0,168941 |
| 0,254613 | 0,198616 | 0,167292 | 0,167305 | 0,050648 | 1,980965 | 1,856493 | 1,900852 | 0,49868  | 19,64251 | 0,05919  | 0,386107 | 0,2338   | 0,189294 | 0,192036 |
| 0,309116 | 0,21893  | 0,158593 | 0,160584 | 0,043037 | 2,127915 | 1,99782  | 1,653491 | 0,500861 | 21,38293 | 0,063217 | 0,408452 | 0,303872 | 0,214709 | 0,179584 |
| 0,259831 | 0,196809 | 0,151146 | 0,165663 | 0,062462 | 2,064226 | 1,817517 | 1,831452 | 0,475501 | 19,77736 | 0,071011 | 0,357095 | 0,227447 | 0,173976 | 0,16338  |
| 0,268031 | 0,179233 | 0,143049 | 0,16609  | 0,067521 | 2,019489 | 1,878207 | 1,587185 | 0,528253 | 19,97489 | 0,06419  | 0,389054 | 0,261373 | 0,183736 | 0,169273 |
| 0,277505 | 0,200948 | 0,163811 | 0,164838 | 0,040806 | 2,154414 | 2,148248 | 1,762783 | 0,504632 | 21,40253 | 0,058249 | 0,405329 | 0,26178  | 0,179897 | 0,174412 |
| 0,289649 | 0,193743 | 0,154148 | 0,156786 | 0,053335 | 2,055409 | 1,802478 | 1,783274 | 0,46435  | 20,88769 | 0,083207 | 0,421632 | 0,245274 | 0,164933 | 0,153044 |
| 0,29434  | 0,214974 | 0,162437 | 0,163721 | 0,072691 | 2,16003  | 1,872025 | 1,678991 | 0,426998 | 20,88321 | 0,071775 | 0,376953 | 0,239758 | 0,178135 | 0,157872 |
| 0,264642 | 0,182876 | 0,167391 | 0,176219 | 0,03945  | 2,023397 | 2,175563 | 1,839582 | 0,54692  | 22,43153 | 0,053261 | 0,395778 | 0,227094 | 0,16139  | 0,163835 |
| 0,297206 | 0,235275 | 0,177387 | 0,189393 | 0,058432 | 1,970408 | 1,808172 | 1,888143 | 0,499504 | 19,77731 | 0,064347 | 0,444717 | 0,274857 | 0,216281 | 0,199316 |
| 0,22604  | 0,164541 | 0,132333 | 0,143753 | 0,069466 | 2,039864 | 1,862008 | 1,687926 | 0,449268 | 17,95863 | 0,072996 | 0,2767   | 0,189643 | 0,14592  | 0,141118 |
| 0,236735 | 0,181289 | 0,151181 | 0,167591 | 0,065941 | 1,994563 | 1,795752 | 1,633141 | 0,431016 | 17,47694 | 0,073659 | 0,316204 | 0,211284 | 0,18921  | 0,193159 |
| 0,281346 | 0,205355 | 0,150405 | 0,152824 | 0,041096 | 2,087226 | 1,920005 | 1,70516  | 0,42968  | 20,72625 | 0,062681 | 0,418364 | 0,273741 | 0,19724  | 0,173266 |
| 0,277581 | 0,195066 | 0,152934 | 0,174629 | 0,059364 | 2,062612 | 1,790398 | 1,811049 | 0,508253 | 19,86519 | 0,07191  | 0,354343 | 0,22594  | 0,172963 | 0,16105  |
| 0,295424 | 0,225837 | 0,160588 | 0,187118 | 0,069269 | 1,977639 | 1,801807 | 1,829045 | 0,496428 | 19,40394 | 0,063695 | 0,446329 | 0,284344 | 0,217882 | 0,191728 |
| 0,291687 | 0,193723 | 0,15908  | 0,18325  | 0,072985 | 1,964498 | 1,784065 | 1,751318 | 0,462192 | 19,10737 | 0,083613 | 0,430904 | 0,256319 | 0,182913 | 0,189318 |
| 0,302185 | 0,221972 | 0,174438 | 0,14886  | 0,039107 | 2,064416 | 1,933391 | 1,948254 | 0,435096 | 21,85897 | 0,064655 | 0,433739 | 0,28227  | 0,212947 | 0,186708 |
| 0,319297 | 0,219152 | 0,177119 | 0,157257 | 0,037903 | 2,091436 | 2,046419 | 1,819368 | 0,468214 | 23,51123 | 0,048512 | 0,4878   | 0,335399 | 0,218977 | 0,179634 |
| 0,301977 | 0,238718 | 0,19527  | 0,16951  | 0,054614 | 1,987284 | 1,865929 | 1,980274 | 0,444693 | 21,41297 | 0,04655  | 0,475574 | 0,286177 | 0,224231 | 0,2033   |
| 0,309469 | 0,238939 | 0,19422  | 0,158936 | 0,056287 | 2,018152 | 1,915014 | 1,955833 | 0,430219 | 21,75647 | 0,065845 | 0,476209 | 0,293102 | 0,232274 | 0,207939 |
| 0,29319  | 0,213788 | 0,176404 | 0,146199 | 0,038345 | 2,036685 | 1,971982 | 1,894159 | 0,448359 | 22,84289 | 0,060837 | 0,484947 | 0,288547 | 0,205123 | 0,184    |
| 0,312385 | 0,226839 | 0,171144 | 0,142548 | 0,037319 | 2,08561  | 1,998158 | 1,831532 | 0,390904 | 22,7007  | 0,0569   | 0,470317 | 0,306856 | 0,219614 | 0,181951 |
| 0,296359 | 0,197912 | 0,16175  | 0,14835  | 0,060325 | 1,984125 | 1,830047 | 1,827035 | 0,396572 | 21,52082 | 0,096419 | 0,444536 | 0,303032 | 0,196889 | 0,167205 |
| 0,314078 | 0,221815 | 0,196104 | 0,166189 | 0,037783 | 2,083061 | 2,202115 | 1,945916 | 0,483854 | 24,66383 | 0,059563 | 0,46491  | 0,279519 | 0,200418 | 0,178583 |
| 0,309373 | 0,241762 | 0,200009 | 0,163265 | 0,066161 | 1,993696 | 1,893057 | 1,926197 | 0,431115 | 21,45079 | 0,065477 | 0,517959 | 0,304252 | 0,252705 | 0,232379 |
| 0,307886 | 0,235441 | 0,191111 | 0,158003 | 0,04929  | 2,041651 | 1,930786 | 1,978701 | 0,435868 | 21,98855 | 0,064804 | 0,460753 | 0,28891  | 0,22487  | 0,200428 |
| 0,307491 | 0,223926 | 0,189791 | 0,147467 | 0,037522 | 2,226507 | 2,164698 | 1,812661 | 0,43718  | 23,00465 | 0,043203 | 0,460613 | 0,29876  | 0,2037   | 0,182571 |

| R8p      | R1i      | R2i+     | R3i+     | R4i+     | R5i+     | R3s      | R5s      | R6s      | R4s+     | R6s+     | R7s+     | DP20     | nCp | nArX |
|----------|----------|----------|----------|----------|----------|----------|----------|----------|----------|----------|----------|----------|-----|------|
| 0,177844 | 2,263187 | 0,147308 | 0,122796 | 0,09929  | 0,060037 | 5,828921 | 3,789588 | 2,342884 | 0,475894 | 0,643613 | 0,141458 | 0,533121 | 0   | 0    |
| 0,16924  | 2,240021 | 0,156621 | 0,117889 | 0,096623 | 0,060869 | 5,706094 | 3,644173 | 2,191909 | 0,463111 | 0,584829 | 0,11255  | 2,002006 | 1   | 0    |
| 0,190175 | 2,139235 | 0,17734  | 0,139002 | 0,109595 | 0,065374 | 6,157002 | 3,603693 | 2,315706 | 0,525286 | 0,583768 | 0,171672 | 2,603429 | 0   | 1    |
| 0,173603 | 2,330171 | 0,149382 | 0,095357 | 0,081626 | 0,081762 | 5,529698 | 3,800596 | 2,297805 | 0,391231 | 0,48758  | 0,13562  | 2,874415 | 0   | 0    |
| 0,186053 | 2,18422  | 0,158768 | 0,123569 | 0,101269 | 0,06247  | 6,451286 | 3,723507 | 2,504939 | 0,48538  | 0,614412 | 0,264767 | 2,418001 | 0   | 1    |
| 0,169751 | 2,363782 | 0,126965 | 0,105676 | 0,07512  | 0,070774 | 5,49069  | 4,446059 | 2,834305 | 0,360049 | 0,649948 | 0,109987 | 3,687828 | 0   | 0    |
| 0,172153 | 2,243724 | 0,178807 | 0,132554 | 0,091025 | 0,058956 | 7,245677 | 4,11058  | 3,179267 | 0,436281 | 0,734429 | 0,556578 | 2,233202 | 0   | 1    |
| 0,189459 | 2,259925 | 0,193289 | 0,097184 | 0,093571 | 0,053293 | 5,244502 | 4,157829 | 2,152983 | 0,448482 | 0,54651  | 0,116327 | 1,194817 | 1   | 0    |
| 0,171341 | 2,349612 | 0,142604 | 0,108816 | 0,08495  | 0,069557 | 5,925105 | 4,115911 | 2,637577 | 0,407161 | 0,604134 | 0,169511 | 3,360532 | 0   | 0    |
| 0,148546 | 2,220852 | 0,15268  | 0,094867 | 0,11627  | 0,069082 | 7,217112 | 5,52964  | 3,092092 | 0,55728  | 0,909153 | 0,577499 | 5,218025 | 0   | 0    |
| 0,160549 | 2,302165 | 0,20809  | 0,1054   | 0,101835 | 0,05959  | 6,804899 | 5,209203 | 3,994416 | 0,488092 | 0,685761 | 0,517087 | 1,69858  | 0   | 0    |
| 0,162643 | 2,218796 | 0,219971 | 0,108675 | 0,115403 | 0,061439 | 8,09449  | 5,039547 | 2,446721 | 0,494094 | 0,565324 | 0,504072 | 4,101275 | 1   | 0    |
| 0,210756 | 2,113074 | 0,130054 | 0,107707 | 0,08581  | 0,057292 | 7,621525 | 4,313383 | 3,117389 | 0,411283 | 0,680388 | 0,290849 | 2,703005 | 0   | 2    |
| 0,141007 | 2,201244 | 0,198859 | 0,128482 | 0,104215 | 0,062443 | 5,933278 | 3,759609 | 2,543285 | 0,499501 | 0,747311 | 0,186853 | 0,452254 | 0   | 0    |
| 0,174509 | 2,150152 | 0,188766 | 0,125838 | 0,102841 | 0,063454 | 5,472253 | 3,761822 | 2,483996 | 0,492915 | 0,739693 | 0,180526 | 0,478741 | 0   | 0    |
| 0,170201 | 2,351986 | 0,142108 | 0,104631 | 0,074953 | 0,060529 | 5,427934 | 3,950985 | 2,658407 | 0,359246 | 0,651577 | 0,12738  | 1,750776 | 1   | 0    |
| 0,167478 | 2,24512  | 0,16994  | 0,144237 | 0,085521 | 0,069703 | 7,099459 | 5,344743 | 2,793981 | 0,99371  | 0,73801  | 0,250844 | 0,902507 | 0   | 1    |
| 0,220241 | 2,158193 | 0,133343 | 0,108068 | 0,087363 | 0,057604 | 5,967091 | 4,047354 | 2,664208 | 0,418728 | 0,66834  | 0,140698 | 2,364068 | 0   | 1    |
| 0,198856 | 2,119719 | 0,208931 | 0,103868 | 0,095368 | 0,069418 | 6,212289 | 4,895394 | 2,598215 | 0,634551 | 0,819231 | 0,139055 | 1,086546 | 0   | 1    |
| 0,179824 | 2,332124 | 0,149507 | 0,112564 | 0,076848 | 0,075539 | 5,47943  | 3,662309 | 3,258637 | 0,372402 | 0,6705   | 0,508411 | 0,301443 | 0   | 0    |
| 0,180219 | 2,369579 | 0,115382 | 0,108562 | 0,075238 | 0,074117 | 5,389367 | 3,517266 | 3,135262 | 0,360614 | 0,608112 | 0,49353  | 2,563388 | 0   | 0    |
| 0,204854 | 2,157258 | 0,105533 | 0,103195 | 0,081504 | 0,054386 | 7,209334 | 3,542549 | 3,300276 | 0,324616 | 0,685876 | 0,513641 | 2,43968  | 0   | 2    |
| 0,193773 | 2,250734 | 0,144117 | 0,112899 | 0,070797 | 0,076929 | 5,765405 | 3,656033 | 3,312188 | 0,372648 | 0,663648 | 0,49425  | 2,605783 | 0   | 1    |
| 0,174839 | 2,324309 | 0,138626 | 0,1121   | 0,077753 | 0,071078 | 5,393395 | 3,484373 | 3,047649 | 0,360736 | 0,630379 | 0,483304 | 1,658742 | 1   | 0    |
| 0,172799 | 2,383623 | 0,133477 | 0,105437 | 0,071981 | 0,066478 | 5,226906 | 3,62013  | 3,300832 | 0,344118 | 0,604259 | 0,425599 | 1,474595 | 1   | 0    |
| 0,177193 | 2,219162 | 0,172691 | 0,110725 | 0,092984 | 0,11265  | 5,427306 | 3,464379 | 2,681086 | 0,44567  | 0,616011 | 0,503764 | 4,976068 | 0   | 0    |
| 0,167895 | 2,311342 | 0,167312 | 0,107747 | 0,103381 | 0,069589 | 7,675873 | 4,780748 | 3,328911 | 0,442623 | 0,636414 | 0,490204 | 3,800837 | 1   | 0    |
| 0,211787 | 2,230068 | 0,145384 | 0,111292 | 0,07598  | 0,076499 | 5,59283  | 3,586615 | 3,1517   | 0,357376 | 0,630067 | 0,466768 | 2,838841 | 0   | 1    |
| 0,18935  | 2,274554 | 0,144002 | 0,112523 | 0,072084 | 0,075712 | 6,070537 | 3,657418 | 3,404175 | 0,365383 | 0,657269 | 0,489713 | 2,241317 | 0   | 1    |
| 0,165205 | 2,43777  | 0,126481 | 0,107329 | 0,063941 | 0,062289 | 5,504856 | 3,477378 | 3,105216 | 0,282777 | 0,699223 | 0,542288 | 2,677255 | 0   | 0    |

| C-001 | C-005 | C-025 | C-026 | H-046 | F-084 | SssCH2     | SaaCH    | SaaC     | SaaO     | NaasC | CATS2D_0: | CATS2D_0: | CATS2D_0: | CATS2D_0: |
|-------|-------|-------|-------|-------|-------|------------|----------|----------|----------|-------|-----------|-----------|-----------|-----------|
| 0     | 0     | 1     | 0     | 0     | 0     | 0 0,081934 | 9,333762 | 1,613844 | 4,917233 | 3     | 3         | 2         | 0         | 6         |
| 1     | 0     | 2     | 0     | 3     | 3     | 0 0,080085 | 7,685027 | 2,774623 | 4,947473 | 4     | 3         | 2         | 0         | 6         |
| 0     | 0     | 1     | 1     | 0     | 0     | 0 0,063326 | 7,42461  | 2,524571 | 4,935754 | 4     | 3         | 2         | 0         | 6         |
| 0     | 1     | 1     | 1     | 0     | 0     | 0 0,037434 | 7,164193 | 2,217305 | 4,942554 | 4     | 3         | 4         | 0         | 8         |
| 0     | 0     | 1     | 1     | 0     | 0     | 0 0,032911 | 6,952002 | 2,070773 | 4,914487 | 4     | 3         | 2         | 0         | 6         |
| 0     | 1     | 1     | 1     | 0     | 0     | 0 0,026831 | 7,203621 | 2,116346 | 4,949929 | 4     | 3         | 3         | 0         | 8         |
| 0     | 0     | 1     | 1     | 0     | 1     | -0,05399   | 5,601693 | 0,774206 | 4,853723 | 4     | 3         | 2         | 0         | 6         |
| 1     | 0     | 2     | 0     | 3     | 0     | 0 0,07998  | 7,657454 | 2,721854 | 4,972233 | 4     | 3         | 2         | 0         | 6         |
| 0     | 0     | 1     | 2     | 0     | 0     | 0 0,198958 | 5,283219 | 2,652056 | 4,964545 | 5     | 4         | 5         | 0         | 8         |
| 0     | 0     | 1     | 1     | 0     | 0     | 0 -0,12082 | 5,635027 | 0,943767 | 4,861053 | 4     | 4         | 4         | 2         | 8         |
| 0     | 0     | 1     | 1     | 0     | 0     | 0 -0,16584 | 5,762926 | 0,665732 | 4,847729 | 4     | 4         | 7         | 0         | 8         |
| 0     | 0     | 2     | 0     | 0     | 0     | 0 -0,25931 | 4,255443 | -0,23654 | 4,792525 | 4     | 3         | 2         | 0         | 6         |
| 0     | 0     | 1     | 2     | 0     | 0     | 0 -0,02811 | 4,925889 | 2,033682 | 4,911274 | 5     | 3         | 2         | 0         | 6         |
| 0     | 0     | 0     | 0     | 0     | 0     | 0 0,023641 | 4,881404 | 1,053146 | 9,871422 | 3     | 3         | 2         | 2         | 6         |
| 0     | 0     | 0     | 0     | 0     | 0     | 0 0,103951 | 5,668441 | 1,721665 | 4,893287 | 3     | 3         | 2         | 0         | 4         |
| 1     | 0     | 2     | 0     | 3     | 0     | 0 0,07996  | 7,690704 | 2,740546 | 4,957104 | 4     | 3         | 2         | 0         | 6         |
| 0     | 0     | 1     | 1     | 0     | 1     | -0,13622   | 6,000787 | 0,013521 | 4,805566 | 4     | 3         | 2         | 0         | 6         |
| 0     | 0     | 1     | 1     | 0     | 0     | 0 0,058982 | 7,447162 | 2,460865 | 4,941798 | 4     | 3         | 2         | 0         | 6         |
| 0     | 0     | 1     | 1     | 0     | 0     | 0 0,00391  | 7,074553 | 1,768922 | 4,913591 | 4     | 3         | 2         | 0         | 6         |
| 0     | 0     | 1     | 0     | 2     | 0     | 0 0,898433 | 9,457228 | 1,848661 | 5,026413 | 3     | 3         | 4         | 0         | 6         |
| 0     | 1     | 1     | 1     | 2     | 0     | 0 0,837265 | 7,270038 | 2,467869 | 5,051734 | 4     | 3         | 6         | 0         | 8         |
| 0     | 0     | 1     | 2     | 2     | 0     | 0 0,748144 | 5,008987 | 2,304817 | 5,020454 | 5     | 3         | 4         | 0         | 6         |
| 0     | 0     | 1     | 1     | 2     | 0     | 0 0,872827 | 7,530455 | 2,775136 | 5,044934 | 4     | 3         | 4         | 0         | 6         |
| 1     | 0     | 2     | 0     | 5     | 0     | 0 0,895785 | 7,790872 | 3,025188 | 5,056653 | 4     | 3         | 4         | 0         | 6         |
| 1     | 0     | 2     | 0     | 5     | 0     | 0 0,895574 | 7,791424 | 2,995934 | 5,066284 | 4     | 3         | 4         | 0         | 6         |
| 0     | 0     | 3     | 0     | 2     | 0     | 0 0,858364 | 13,90129 | 1,872625 | 5,175334 | 3     | 3         | 4         | 0         | 6         |
| 0     | 0     | 2     | 0     | 2     | 0     | 0 0,427169 | 4,361288 | 0,014028 | 4,901705 | 4     | 3         | 4         | 0         | 6         |
| 0     | 0     | 1     | 1     | 2     | 0     | 0 0,892111 | 7,749205 | 2,985179 | 5,054778 | 4     | 3         | 4         | 0         | 6         |
| 0     | 0     | 1     | 1     | 2     | 0     | 0 0,831163 | 7,057847 | 2,321337 | 5,023667 | 4     | 3         | 4         | 0         | 6         |
| 0     | 0     | 1     | 2     | 2     | 0     | 0 0,997896 | 5,366318 | 2,923191 | 5,073724 | 5     | 4         | 7         | 0         | 8         |

| CATS2D_0 | T(Cl..Cl) | B05[C-Br] |
|----------|----------|----------|----------|----------|----------|----------|----------|----------|----------|----------|----------|----------|-----------|-----------|
| 10       | 7        | 4        | 1        | 2        | 4        | 4        | 6        | 3        | 3        | 4        | 1        | 0        | 0         | 0         |
| 10       | 7        | 4        | 3        | 3        | 4        | 4        | 8        | 5        | 3        | 4        | 2        | 1        | 0         | 0         |
| 10       | 7        | 2        | 2        | 3        | 4        | 4        | 6        | 4        | 3        | 4        | 1        | 1        | 0         | 1         |
| 12       | 8        | 2        | 0        | 2        | 5        | 5        | 4        | 2        | 3        | 4        | 0        | 0        | 0         | 0         |
| 10       | 7        | 2        | 2        | 3        | 4        | 4        | 6        | 4        | 3        | 4        | 1        | 1        | 0         | 0         |
| 12       | 6        | 3        | 1        | 3        | 5        | 2        | 4        | 2        | 3        | 3        | 1        | 0        | 0         | 0         |
| 10       | 7        | 2        | 0        | 2        | 4        | 4        | 4        | 2        | 3        | 4        | 0        | 0        | 0         | 0         |
| 10       | 9        | 5        | 1        | 2        | 4        | 6        | 8        | 5        | 3        | 5        | 1        | 0        | 0         | 0         |
| 14       | 7        | 1        | 0        | 3        | 6        | 3        | 2        | 1        | 3        | 3        | 0        | 0        | 0         | 0         |
| 16       | 12       | 4        | 0        | 2        | 5        | 7        | 4        | 2        | 3        | 4        | 0        | 0        | 0         | 0         |
| 16       | 10       | 5        | 1        | 3        | 7        | 4        | 4        | 2        | 3        | 3        | 1        | 0        | 0         | 0         |
| 10       | 7        | 4        | 1        | 2        | 4        | 4        | 6        | 3        | 3        | 4        | 1        | 0        | 0         | 0         |
| 10       | 5        | 3        | 3        | 3        | 4        | 2        | 4        | 6        | 3        | 3        | 2        | 1        | 3         | 0         |
| 7        | 4        | 2        | 1        | 0        | 2        | 2        | 0        | 0        | 1        | 2        | 0        | 0        | 0         | 0         |
| 9        | 5        | 1        | 0        | 0        | 4        | 2        | 2        | 0        | 2        | 3        | 0        | 0        | 0         | 0         |
| 10       | 7        | 6        | 2        | 2        | 4        | 4        | 8        | 5        | 3        | 4        | 2        | 0        | 0         | 0         |
| 8        | 6        | 4        | 1        | 2        | 2        | 4        | 4        | 2        | 2        | 3        | 1        | 0        | 0         | 0         |
| 10       | 5        | 5        | 2        | 2        | 4        | 2        | 6        | 4        | 3        | 3        | 2        | 0        | 0         | 0         |
| 8        | 8        | 5        | 1        | 2        | 2        | 6        | 6        | 4        | 2        | 4        | 1        | 0        | 0         | 0         |
| 10       | 11       | 5        | 1        | 0        | 2        | 4        | 7        | 3        | 3        | 5        | 3        | 1        | 0         | 0         |
| 12       | 12       | 3        | 0        | 0        | 3        | 5        | 5        | 2        | 3        | 5        | 2        | 0        | 0         | 0         |
| 10       | 9        | 4        | 3        | 1        | 2        | 4        | 5        | 6        | 3        | 4        | 3        | 2        | 3         | 0         |
| 10       | 11       | 3        | 2        | 1        | 2        | 4        | 7        | 4        | 3        | 5        | 3        | 1        | 0         | 1         |
| 10       | 11       | 5        | 3        | 1        | 2        | 4        | 9        | 5        | 3        | 5        | 4        | 2        | 0         | 0         |
| 10       | 11       | 7        | 2        | 0        | 2        | 4        | 9        | 5        | 3        | 5        | 4        | 2        | 0         | 0         |
| 10       | 13       | 10       | 5        | 1        | 2        | 4        | 15       | 12       | 5        | 6        | 7        | 4        | 0         | 0         |
| 10       | 11       | 5        | 1        | 0        | 2        | 4        | 7        | 3        | 3        | 5        | 3        | 1        | 0         | 0         |
| 10       | 11       | 3        | 2        | 1        | 2        | 4        | 7        | 4        | 3        | 5        | 3        | 1        | 0         | 0         |
| 10       | 11       | 3        | 2        | 1        | 2        | 4        | 7        | 4        | 3        | 5        | 3        | 1        | 0         | 0         |
| 14       | 11       | 2        | 0        | 1        | 4        | 6        | 3        | 1        | 3        | 4        | 1        | 0        | 0         | 0         |



| B06[C-N] | B06[C-F] | B06[C-Cl] | B06[N-Cl] | B06[O-O] | B07[O-O] | B09[C-F] | B10[C-C] | B10[O-O] | F03[C-N] | F04[C-N] | F05[C-C] | F05[C-N] | F05[N-O] | F06[C-N] |   |
|----------|----------|-----------|-----------|----------|----------|----------|----------|----------|----------|----------|----------|----------|----------|----------|---|
| 0        | 0        | 0         | 0         | 0        | 0        | 0        | 0        | 0        | 0        | 6        | 6        | 6        | 3        | 2        | 0 |
| 1        | 0        | 0         | 0         | 0        | 0        | 0        | 0        | 1        | 0        | 6        | 6        | 7        | 3        | 2        | 2 |
| 0        | 0        | 0         | 0         | 0        | 0        | 0        | 0        | 0        | 0        | 6        | 6        | 6        | 3        | 2        | 0 |
| 0        | 0        | 0         | 0         | 0        | 1        | 0        | 1        | 0        | 0        | 6        | 6        | 7        | 3        | 2        | 0 |
| 0        | 0        | 0         | 1         | 0        | 0        | 0        | 0        | 0        | 0        | 6        | 6        | 6        | 3        | 2        | 0 |
| 1        | 0        | 0         | 0         | 1        | 0        | 0        | 1        | 1        | 1        | 6        | 6        | 8        | 3        | 4        | 2 |
| 0        | 0        | 0         | 0         | 0        | 0        | 1        | 0        | 0        | 0        | 6        | 6        | 6        | 3        | 2        | 0 |
| 0        | 0        | 0         | 0         | 0        | 0        | 0        | 0        | 0        | 0        | 6        | 8        | 7        | 3        | 2        | 0 |
| 1        | 0        | 0         | 0         | 1        | 1        | 0        | 1        | 1        | 1        | 6        | 6        | 7        | 3        | 4        | 2 |
| 0        | 0        | 0         | 0         | 0        | 0        | 0        | 0        | 0        | 0        | 8        | 7        | 6        | 4        | 2        | 0 |
| 1        | 0        | 0         | 0         | 0        | 1        | 0        | 0        | 0        | 0        | 8        | 8        | 6        | 3        | 2        | 1 |
| 1        | 1        | 0         | 0         | 0        | 0        | 1        | 1        | 1        | 0        | 6        | 6        | 7        | 3        | 2        | 2 |
| 0        | 0        | 1         | 1         | 0        | 0        | 0        | 0        | 0        | 0        | 6        | 6        | 6        | 3        | 2        | 0 |
| 0        | 0        | 0         | 0         | 0        | 0        | 0        | 0        | 0        | 0        | 4        | 6        | 5        | 1        | 2        | 0 |
| 0        | 0        | 0         | 0         | 0        | 0        | 0        | 0        | 0        | 0        | 4        | 6        | 5        | 1        | 2        | 0 |
| 0        | 0        | 0         | 0         | 0        | 0        | 0        | 0        | 0        | 0        | 6        | 6        | 6        | 5        | 2        | 0 |
| 0        | 1        | 0         | 0         | 0        | 0        | 0        | 0        | 0        | 0        | 6        | 6        | 6        | 3        | 2        | 0 |
| 0        | 0        | 0         | 0         | 0        | 0        | 0        | 0        | 0        | 0        | 6        | 6        | 6        | 3        | 2        | 0 |
| 0        | 0        | 1         | 0         | 0        | 0        | 0        | 0        | 0        | 0        | 6        | 6        | 6        | 3        | 2        | 0 |
| 1        | 0        | 0         | 0         | 1        | 0        | 0        | 1        | 0        | 0        | 6        | 6        | 6        | 4        | 0        | 1 |
| 1        | 0        | 0         | 0         | 1        | 1        | 0        | 1        | 0        | 0        | 6        | 6        | 7        | 4        | 0        | 1 |
| 1        | 0        | 1         | 1         | 1        | 0        | 0        | 1        | 0        | 0        | 6        | 6        | 6        | 4        | 0        | 1 |
| 1        | 0        | 0         | 0         | 1        | 0        | 0        | 1        | 0        | 0        | 6        | 6        | 6        | 4        | 0        | 1 |
| 1        | 0        | 0         | 0         | 1        | 0        | 0        | 1        | 0        | 0        | 6        | 6        | 7        | 4        | 0        | 3 |
| 1        | 0        | 0         | 0         | 1        | 0        | 0        | 1        | 0        | 0        | 6        | 6        | 6        | 6        | 0        | 1 |
| 1        | 0        | 0         | 0         | 1        | 0        | 0        | 1        | 0        | 0        | 6        | 8        | 10       | 8        | 0        | 3 |
| 1        | 1        | 0         | 0         | 1        | 0        | 1        | 1        | 0        | 0        | 6        | 6        | 7        | 4        | 0        | 3 |
| 1        | 0        | 0         | 0         | 1        | 0        | 0        | 1        | 0        | 0        | 6        | 6        | 6        | 4        | 0        | 1 |
| 1        | 0        | 0         | 1         | 1        | 0        | 0        | 1        | 0        | 0        | 6        | 6        | 6        | 4        | 0        | 1 |
| 1        | 0        | 0         | 0         | 1        | 1        | 0        | 1        | 0        | 0        | 6        | 6        | 7        | 4        | 2        | 3 |

| F06[C-O] | F06[N-O] | F07[C-N] | F07[C-O] | F07[N-O] | F08[C-O] | F09[C-O] | F10[C-C] | F10[C-O] | MLOGP    | PDI      | DLS_04 | DLS_05 | LLS_01   | CATS3D_0: |
|----------|----------|----------|----------|----------|----------|----------|----------|----------|----------|----------|--------|--------|----------|-----------|
| 3        | 2        | 0        | 2        | 0        | 4        | 4        | 0        | 2        | 2,310081 | 0,941784 | 0,4    | 0      | 0,5      | 4         |
| 3        | 2        | 0        | 3        | 0        | 4        | 4        | 1        | 2        | 2,591121 | 0,937904 | 0,8    | 0,5    | 0,5      | 4         |
| 3        | 2        | 0        | 2        | 0        | 4        | 4        | 0        | 2        | 2,996116 | 0,951566 | 0,4    | 0      | 0,5      | 4         |
| 3        | 4        | 2        | 3        | 0        | 6        | 5        | 1        | 3        | 2,087164 | 0,923735 | 0,8    | 0      | 0,5      | 4         |
| 3        | 2        | 0        | 2        | 0        | 4        | 4        | 0        | 2        | 2,859121 | 0,942387 | 0,4    | 0      | 0,5      | 4         |
| 4        | 2        | 0        | 4        | 0        | 5        | 5        | 1        | 2        | 2,087164 | 0,923735 | 0,8    | 0      | 0,5      | 4         |
| 3        | 2        | 0        | 2        | 0        | 4        | 4        | 0        | 2        | 2,719823 | 0,942714 | 0,4    | 0      | 0,5      | 3         |
| 3        | 2        | 0        | 2        | 0        | 4        | 6        | 0        | 2        | 2,591121 | 0,937904 | 0,8    | 0,5    | 0,5      | 3         |
| 4        | 4        | 0        | 5        | 0        | 6        | 6        | 1        | 3        | 2,002029 | 0,961888 | 0,6    | 0      | 0,5      | 5         |
| 5        | 2        | 1        | 2        | 5        | 6        | 6        | 0        | 4        | 2,396659 | 0,919845 | 0,4    | 0      | 0,5      | 4         |
| 3        | 7        | 1        | 4        | 0        | 6        | 6        | 0        | 4        | 2,396659 | 0,919845 | 0,4    | 0      | 0,5      | 4         |
| 3        | 2        | 0        | 3        | 0        | 4        | 4        | 1        | 2        | 3,263696 | 0,940512 | 0,6    | 0,5    | 0,333333 | 4         |
| 3        | 2        | 0        | 2        | 0        | 4        | 4        | 0        | 2        | 3,398936 | 0,942907 | 0,4    | 0      | 0,333333 | 4         |
| 3        | 2        | 0        | 3        | 0        | 2        | 4        | 0        | 0        | 1,291068 | 0,928959 | 0,4    | 0      | 0,5      | 3         |
| 2        | 2        | 0        | 2        | 0        | 2        | 4        | 0        | 0        | 2,063025 | 0,947626 | 0,4    | 0      | 0,5      | 3         |
| 4        | 2        | 0        | 2        | 0        | 4        | 4        | 0        | 4        | 2,591121 | 0,937904 | 0,8    | 0,5    | 0,5      | 4         |
| 3        | 2        | 0        | 2        | 0        | 4        | 4        | 0        | 2        | 2,719823 | 0,942714 | 0,4    | 0      | 0,5      | 3         |
| 3        | 2        | 0        | 2        | 0        | 4        | 4        | 0        | 2        | 2,996116 | 0,951566 | 0,4    | 0      | 0,5      | 4         |
| 3        | 2        | 0        | 2        | 0        | 4        | 4        | 0        | 2        | 2,859121 | 0,942387 | 0,4    | 0      | 0,5      | 3         |
| 1        | 2        | 0        | 2        | 2        | 2        | 4        | 1        | 4        | 2,591121 | 0,937904 | 0,8    | 0,5    | 0,5      | 4         |
| 1        | 4        | 2        | 3        | 2        | 4        | 5        | 2        | 5        | 2,358979 | 0,921718 | 0,8    | 0,5    | 0,5      | 4         |
| 1        | 2        | 0        | 2        | 2        | 2        | 4        | 1        | 4        | 3,662504 | 0,939429 | 0,6    | 0,5    | 0,166667 | 4         |
| 1        | 2        | 0        | 2        | 2        | 2        | 4        | 1        | 4        | 3,263696 | 0,947232 | 0,6    | 0,5    | 0,166667 | 4         |
| 1        | 2        | 0        | 3        | 2        | 2        | 4        | 2        | 4        | 2,862936 | 0,93465  | 0,8    | 0,5    | 0,5      | 4         |
| 2        | 2        | 0        | 2        | 2        | 2        | 4        | 2        | 4        | 2,862936 | 0,93465  | 0,8    | 0,5    | 0,5      | 4         |
| 3        | 2        | 0        | 3        | 2        | 2        | 4        | 4        | 6        | 3,478874 | 0,986072 | 0,6    | 0,5    | 0,333333 | 3         |
| 1        | 2        | 0        | 3        | 2        | 2        | 4        | 2        | 4        | 3,523456 | 0,937136 | 0,6    | 0,5    | 0,333333 | 4         |
| 1        | 2        | 0        | 2        | 2        | 2        | 4        | 1        | 4        | 3,394504 | 0,96189  | 0,6    | 0,5    | 0,166667 | 4         |
| 1        | 2        | 0        | 2        | 2        | 2        | 4        | 1        | 4        | 3,130936 | 0,938718 | 0,6    | 0,5    | 0,333333 | 4         |
| 2        | 4        | 0        | 5        | 2        | 4        | 6        | 2        | 6        | 2,273843 | 0,956604 | 0,6    | 0,5    | 0,5      | 5         |

| CATS3D_0: | CATS3D_1: | CATS3D_0: | CATS3D_0: |
|-----------|-----------|-----------|-----------|-----------|-----------|-----------|-----------|-----------|-----------|-----------|-----------|-----------|-----------|-----------|
| 0         | 3         | 1         | 1         | 7         | 9         | 9         | 6         | 5         | 2         | 2         | 0         | 0         | 0         | 3         |
| 0         | 2         | 2         | 1         | 9         | 7         | 9         | 6         | 7         | 4         | 2         | 1         | 0         | 2         | 3         |
| 0         | 3         | 1         | 1         | 8         | 8         | 9         | 4         | 3         | 4         | 3         | 0         | 1         | 0         | 3         |
| 0         | 3         | 1         | 3         | 11        | 9         | 10        | 4         | 3         | 2         | 1         | 2         | 0         | 0         | 3         |
| 0         | 3         | 1         | 1         | 8         | 8         | 9         | 4         | 5         | 2         | 3         | 1         | 0         | 0         | 3         |
| 0         | 3         | 2         | 3         | 8         | 12        | 8         | 5         | 4         | 2         | 3         | 0         | 0         | 0         | 4         |
| 1         | 1         | 4         | 0         | 7         | 9         | 7         | 4         | 4         | 2         | 2         | 0         | 0         | 0         | 4         |
| 1         | 4         | 1         | 0         | 9         | 8         | 9         | 5         | 6         | 3         | 5         | 0         | 0         | 2         | 2         |
| 0         | 3         | 2         | 5         | 8         | 14        | 9         | 3         | 2         | 2         | 3         | 1         | 0         | 0         | 3         |
| 2         | 3         | 1         | 2         | 9         | 15        | 13        | 5         | 3         | 3         | 2         | 3         | 3         | 0         | 3         |
| 1         | 2         | 5         | 5         | 14        | 10        | 11        | 6         | 5         | 6         | 4         | 0         | 0         | 0         | 3         |
| 0         | 3         | 1         | 1         | 8         | 8         | 9         | 6         | 5         | 2         | 2         | 0         | 0         | 0         | 3         |
| 0         | 2         | 2         | 1         | 7         | 9         | 7         | 4         | 6         | 2         | 3         | 2         | 0         | 1         | 4         |
| 3         | 2         | 4         | 1         | 7         | 6         | 4         | 3         | 1         | 2         | 1         | 0         | 0         | 0         | 0         |
| 1         | 1         | 4         | 0         | 5         | 8         | 5         | 2         | 1         | 3         | 1         | 0         | 0         | 0         | 2         |
| 0         | 2         | 2         | 1         | 7         | 9         | 9         | 7         | 7         | 3         | 2         | 1         | 0         | 2         | 4         |
| 1         | 1         | 3         | 1         | 7         | 7         | 6         | 5         | 4         | 3         | 2         | 1         | 0         | 0         | 2         |
| 0         | 2         | 2         | 1         | 7         | 9         | 7         | 6         | 6         | 2         | 2         | 0         | 1         | 0         | 4         |
| 1         | 4         | 1         | 0         | 8         | 7         | 8         | 5         | 5         | 3         | 4         | 0         | 0         | 0         | 2         |
| 0         | 3         | 2         | 0         | 8         | 14        | 10        | 8         | 2         | 3         | 0         | 0         | 0         | 0         | 4         |
| 1         | 2         | 2         | 3         | 10        | 15        | 12        | 5         | 2         | 1         | 1         | 2         | 0         | 0         | 5         |
| 0         | 3         | 0         | 2         | 8         | 11        | 8         | 5         | 7         | 3         | 1         | 2         | 0         | 1         | 5         |
| 0         | 3         | 2         | 0         | 8         | 14        | 9         | 6         | 1         | 4         | 2         | 1         | 0         | 0         | 5         |
| 0         | 3         | 2         | 0         | 9         | 12        | 11        | 8         | 5         | 4         | 1         | 0         | 0         | 2         | 5         |
| 0         | 3         | 2         | 0         | 8         | 14        | 9         | 9         | 4         | 3         | 2         | 1         | 0         | 2         | 4         |
| 0         | 2         | 4         | 0         | 11        | 8         | 13        | 7         | 4         | 5         | 5         | 5         | 5         | 6         | 4         |
| 0         | 3         | 2         | 0         | 8         | 13        | 11        | 8         | 2         | 3         | 0         | 0         | 0         | 0         | 4         |
| 0         | 3         | 1         | 1         | 10        | 11        | 10        | 5         | 2         | 4         | 2         | 1         | 0         | 2         | 4         |
| 0         | 3         | 2         | 0         | 9         | 13        | 10        | 5         | 3         | 3         | 1         | 1         | 0         | 0         | 4         |
| 0         | 3         | 2         | 5         | 10        | 14        | 11        | 4         | 2         | 2         | 4         | 2         | 0         | 0         | 4         |

CATS3D\_0 CATS3D\_0 CATS3D\_0 CATS3D\_0 CATS3D\_10\_LL

|   |   |   |   |   |
|---|---|---|---|---|
| 3 | 4 | 1 | 0 | 0 |
| 3 | 5 | 0 | 2 | 0 |
| 3 | 3 | 0 | 2 | 0 |
| 3 | 3 | 0 | 0 | 0 |
| 3 | 3 | 0 | 2 | 0 |
| 2 | 3 | 0 | 0 | 0 |
| 3 | 2 | 0 | 0 | 0 |
| 5 | 4 | 2 | 0 | 0 |
| 3 | 1 | 0 | 0 | 0 |
| 2 | 3 | 1 | 0 | 0 |
| 2 | 4 | 0 | 0 | 0 |
| 3 | 5 | 0 | 0 | 0 |
| 2 | 1 | 2 | 2 | 0 |
| 2 | 2 | 0 | 0 | 0 |
| 2 | 2 | 0 | 0 | 0 |
| 2 | 5 | 2 | 0 | 0 |
| 2 | 5 | 0 | 0 | 0 |
| 2 | 3 | 1 | 1 | 0 |
| 4 | 3 | 2 | 0 | 0 |
| 5 | 6 | 1 | 0 | 0 |
| 5 | 4 | 0 | 0 | 0 |
| 5 | 1 | 1 | 5 | 0 |
| 5 | 4 | 0 | 2 | 1 |
| 4 | 6 | 2 | 2 | 0 |
| 6 | 5 | 4 | 1 | 0 |
| 7 | 9 | 7 | 4 | 0 |
| 5 | 6 | 1 | 0 | 0 |
| 5 | 4 | 0 | 2 | 1 |
| 5 | 4 | 0 | 2 | 1 |
| 4 | 3 | 0 | 0 | 0 |

QSAR

IC<sub>50</sub> and pIC<sub>50</sub> from Dragon

| IC50uM | pIC50 |
|--------|-------|
| 139    | 3,857 |
| 73     | 4,137 |
| 119    | 3,924 |
| 35     | 4,456 |
| 85     | 4,071 |
| 157    | 3,804 |
| 124    | 3,907 |
| 339    | 3,47  |
| 83     | 4,081 |
| 76     | 4,119 |
| 85     | 4,071 |
| 42     | 4,377 |
| 86     | 4,066 |
| 84     | 4,076 |
| 68     | 4,167 |
| 110    | 3,959 |
| 116    | 3,936 |
| 61     | 4,215 |
| 77     | 4,114 |
| 72     | 4,143 |
| 101    | 3,996 |
| 64     | 4,194 |
| 110    | 3,959 |
| 88     | 4,056 |
| 54     | 4,268 |
| 63     | 4,201 |
| 70     | 4,155 |
| 42     | 4,377 |
| 294    | 3,532 |
| 87     | 4,06  |

QSAR  
Y-scrambling

|          |          |
|----------|----------|
| 0,351225 | -0,42588 |
| 0,245788 | -0,20025 |
| 0,131557 | -0,38015 |
| 0,43502  | -0,0614  |
| 0,064254 | -0,70894 |
| 0,155033 | -0,42309 |
| 0,155614 | -0,75661 |
| 0,348367 | -0,22286 |
| 0,077591 | -0,54344 |
| 0,158453 | -0,7226  |
| 0,029899 | -0,46599 |
| 0,551747 | -0,08296 |
| 0,209912 | -0,51829 |
| 0,250262 | -0,39585 |
| 0,063704 | -0,79056 |
| 0,132301 | -0,40321 |
| 0,25236  | -0,69435 |
| 0,163104 | -0,48643 |
| 0,065393 | -0,69208 |
| 0,258293 | -0,4759  |
| 0,132566 | -0,43489 |
| 0,317597 | -0,16721 |
| 0,166906 | -0,76449 |
| 0,154351 | -0,38189 |
| 0,065342 | -0,7317  |
| 0,080159 | -1,02916 |
| 0,106389 | -0,61379 |
| 0,191567 | -0,38307 |
| 0,061001 | -0,46198 |
| 0,08399  | -0,6104  |
| 0,183838 | -0,6476  |
| 0,071905 | -0,76835 |
| 0,195519 | -0,79365 |

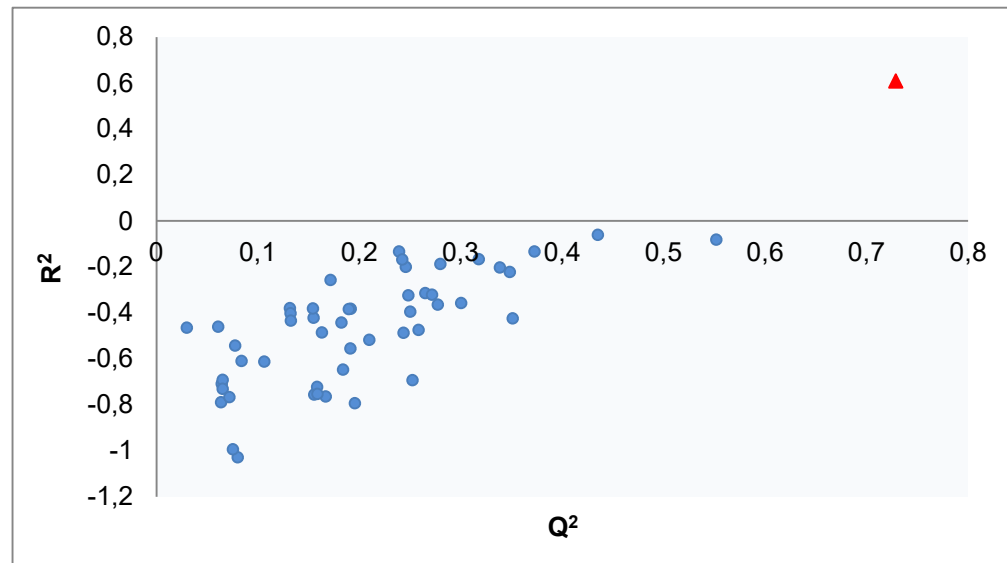



|          |          |
|----------|----------|
| 0,23926  | -0,13424 |
| 0,242255 | -0,16958 |
| 0,372556 | -0,13358 |
| 0,265145 | -0,31491 |
| 0,171487 | -0,25846 |
| 0,189549 | -0,38532 |
| 0,158811 | -0,75415 |
| 0,279925 | -0,18887 |
| 0,191316 | -0,55644 |
| 0,248409 | -0,32483 |
| 0,277365 | -0,36553 |
| 0,338471 | -0,20353 |
| 0,243597 | -0,48739 |
| 0,271607 | -0,32267 |
| 0,300176 | -0,35831 |
| 0,075305 | -0,99442 |
| 0,182484 | -0,44285 |
| 0,72901  | 0,608273 |

QSAR

External Validation

|           | <b>Yexp</b> | <b>Ypred</b> | <b>(B-C)^2</b> | <b>(B-B6)^2</b> | <b>1-(D6/F6)</b> |
|-----------|-------------|--------------|----------------|-----------------|------------------|
| <b>3</b>  | 3,924       | 4,063        | 0,019321       | 0,04906225      |                  |
| <b>12</b> | 4,377       | 4,332        | 0,002025       | 0,05359225      | 0,768291         |
| <b>15</b> | 4,167       | 4,196        | 0,000841       | 0,00046225      |                  |
| <b>19</b> | 4,114       | 4,07         | 0,001936       | 0,00099225      |                  |
|           | 4,1455      |              | 0,024123       | 0,104109        |                  |
|           | <b>Mean</b> |              | <b>Sum</b>     | <b>Sum</b>      |                  |
